# Supplementary material for: Isoliquiritigenin Inhibits the Growth of Colorectal Cancer Cells through the ESR2/PI3K/AKT Signalling Pathway
Source: Pharmaceuticals (Basel). 2023 Dec 27;17(1):43. doi: 10.3390/ph17010043 (PMC10820227; doi:10.3390/ph17010043)
Supplement: Supplementary file 1 [file pharmaceuticals-17-00043-s001.zip]

Archive with 9 entries (9 files):
- crystal structures/ESR2/7xvz.pdb
- crystal structures/ESR2/I1D.pdb
- crystal structures/GSK3a┬/3UO.pdb
- crystal structures/GSK3a┬/5f94.pdb
- crystal structures/PI3KCG/4g11.pdb
- crystal structures/PI3KCG/OW7.pdb
- Figure S1. Fig 5A Supplementary-WB.pdf
- Table S1. Supplementary Materials for molecular docking.xlsx
- Table S2. Supplementary Materials for Network Pharmacology.xlsx
