# Supplementary material for: Isoliquiritigenin Inhibits the Growth of Colorectal Cancer Cells through the ESR2/PI3K/AKT Signalling Pathway
Source: Pharmaceuticals (Basel). 2023 Dec 27;17(1):43. doi: 10.3390/ph17010043 (PMC10820227; doi:10.3390/ph17010043)
Supplement: Supplementary file 1 [file pharmaceuticals-17-00043-s001.zip › crystal structures/ESR2/7xvz.pdb]

HEADER    TRANSCRIPTION/INHIBITOR                 25-MAY-22   7XVZ              
TITLE     HUMAN ESTROGEN RECEPTOR BETA LIGAND-BINDING DOMAIN IN COMPLEX WITH    
TITLE    2 (R)-3-(2-CHLORO-4-HYDROXYPHENYL)-2-(4-HYDROXYPHENYL)PROPANENITRILE   
COMPND    MOL_ID: 1;                                                            
COMPND   2 MOLECULE: ESTROGEN RECEPTOR BETA;                                    
COMPND   3 CHAIN: A, B;                                                         
COMPND   4 FRAGMENT: LIGAND-BINDING DOMAIN;                                     
COMPND   5 SYNONYM: ER-BETA,NUCLEAR RECEPTOR SUBFAMILY 3 GROUP A MEMBER 2;      
COMPND   6 ENGINEERED: YES;                                                     
COMPND   7 MUTATION: YES;                                                       
COMPND   8 MOL_ID: 2;                                                           
COMPND   9 MOLECULE: SRC PEPTIDE;                                               
COMPND  10 CHAIN: C, D;                                                         
COMPND  11 ENGINEERED: YES                                                      
SOURCE    MOL_ID: 1;                                                            
SOURCE   2 ORGANISM_SCIENTIFIC: HOMO SAPIENS;                                   
SOURCE   3 ORGANISM_COMMON: HUMAN;                                              
SOURCE   4 ORGANISM_TAXID: 9606;                                                
SOURCE   5 GENE: ESR2, ESTRB, NR3A2;                                            
SOURCE   6 EXPRESSION_SYSTEM: ESCHERICHIA COLI BL21(DE3);                       
SOURCE   7 EXPRESSION_SYSTEM_TAXID: 469008;                                     
SOURCE   8 MOL_ID: 2;                                                           
SOURCE   9 SYNTHETIC: YES;                                                      
SOURCE  10 ORGANISM_SCIENTIFIC: HOMO SAPIENS;                                   
SOURCE  11 ORGANISM_TAXID: 9606                                                 
KEYWDS    INHIBITOR, TRANSCRIPTION, TRANSCRIPTION-INHIBITOR COMPLEX             
EXPDTA    X-RAY DIFFRACTION                                                     
AUTHOR    N.FURUYA,C.HANDA                                                      
REVDAT   2   27-JUL-22 7XVZ    1       TITLE  JRNL                              
REVDAT   1   20-JUL-22 7XVZ    0                                                
JRNL        AUTH   C.HANDA,Y.YAMAZAKI,S.YONEKUBO,N.FURUYA,T.MOMOSE,T.OZAWA,     
JRNL        AUTH 2 T.FURUISHI,K.FUKUZAWA,E.YONEMOCHI                            
JRNL        TITL   EVALUATING THE CORRELATION OF BINDING AFFINITIES BETWEEN     
JRNL        TITL 2 ISOTHERMAL TITRATION CALORIMETRY AND FRAGMENT MOLECULAR      
JRNL        TITL 3 ORBITAL METHOD OF ESTROGEN RECEPTOR BETA WITH                
JRNL        TITL 4 DIARYLPROPIONITRILE (DPN) OR DPN DERIVATIVES.                
JRNL        REF    J.STEROID BIOCHEM.MOL.BIOL.   V. 222 06152 2022              
JRNL        REFN                   ISSN 0960-0760                               
JRNL        PMID   35810932                                                     
JRNL        DOI    10.1016/J.JSBMB.2022.106152                                  
REMARK   2                                                                      
REMARK   2 RESOLUTION.    2.08 ANGSTROMS.                                       
REMARK   3                                                                      
REMARK   3 REFINEMENT.                                                          
REMARK   3   PROGRAM     : REFMAC 5.8.0238                                      
REMARK   3   AUTHORS     : MURSHUDOV,SKUBAK,LEBEDEV,PANNU,STEINER,              
REMARK   3               : NICHOLLS,WINN,LONG,VAGIN                             
REMARK   3                                                                      
REMARK   3    REFINEMENT TARGET : MAXIMUM LIKELIHOOD                            
REMARK   3                                                                      
REMARK   3  DATA USED IN REFINEMENT.                                            
REMARK   3   RESOLUTION RANGE HIGH (ANGSTROMS) : 2.08                           
REMARK   3   RESOLUTION RANGE LOW  (ANGSTROMS) : 46.06                          
REMARK   3   DATA CUTOFF            (SIGMA(F)) : 0.000                          
REMARK   3   COMPLETENESS FOR RANGE        (%) : 97.5                           
REMARK   3   NUMBER OF REFLECTIONS             : 28068                          
REMARK   3                                                                      
REMARK   3  FIT TO DATA USED IN REFINEMENT.                                     
REMARK   3   CROSS-VALIDATION METHOD          : THROUGHOUT                      
REMARK   3   FREE R VALUE TEST SET SELECTION  : RANDOM                          
REMARK   3   R VALUE     (WORKING + TEST SET) : 0.267                           
REMARK   3   R VALUE            (WORKING SET) : 0.241                           
REMARK   3   FREE R VALUE                     : 0.307                           
REMARK   3   FREE R VALUE TEST SET SIZE   (%) : 5.000                           
REMARK   3   FREE R VALUE TEST SET COUNT      : 1387                            
REMARK   3                                                                      
REMARK   3  FIT IN THE HIGHEST RESOLUTION BIN.                                  
REMARK   3   TOTAL NUMBER OF BINS USED           : NULL                         
REMARK   3   BIN RESOLUTION RANGE HIGH       (A) : 2.08                         
REMARK   3   BIN RESOLUTION RANGE LOW        (A) : 2.13                         
REMARK   3   REFLECTION IN BIN     (WORKING SET) : 798                          
REMARK   3   BIN COMPLETENESS (WORKING+TEST) (%) : 30.31                        
REMARK   3   BIN R VALUE           (WORKING SET) : 0.6700                       
REMARK   3   BIN FREE R VALUE SET COUNT          : 41                           
REMARK   3   BIN FREE R VALUE                    : 0.6890                       
REMARK   3                                                                      
REMARK   3  NUMBER OF NON-HYDROGEN ATOMS USED IN REFINEMENT.                    
REMARK   3   PROTEIN ATOMS            : 3427                                    
REMARK   3   NUCLEIC ACID ATOMS       : 0                                       
REMARK   3   HETEROGEN ATOMS          : 38                                      
REMARK   3   SOLVENT ATOMS            : 10                                      
REMARK   3                                                                      
REMARK   3  B VALUES.                                                           
REMARK   3   FROM WILSON PLOT           (A**2) : NULL                           
REMARK   3   MEAN B VALUE      (OVERALL, A**2) : 36.23                          
REMARK   3   OVERALL ANISOTROPIC B VALUE.                                       
REMARK   3    B11 (A**2) : -1.03000                                             
REMARK   3    B22 (A**2) : 1.74000                                              
REMARK   3    B33 (A**2) : -0.71000                                             
REMARK   3    B12 (A**2) : 0.00000                                              
REMARK   3    B13 (A**2) : 0.00000                                              
REMARK   3    B23 (A**2) : 0.00000                                              
REMARK   3                                                                      
REMARK   3  ESTIMATED OVERALL COORDINATE ERROR.                                 
REMARK   3   ESU BASED ON R VALUE                            (A): 0.241         
REMARK   3   ESU BASED ON FREE R VALUE                       (A): 0.220         
REMARK   3   ESU BASED ON MAXIMUM LIKELIHOOD                 (A): NULL          
REMARK   3   ESU FOR B VALUES BASED ON MAXIMUM LIKELIHOOD (A**2): NULL          
REMARK   3                                                                      
REMARK   3 CORRELATION COEFFICIENTS.                                            
REMARK   3   CORRELATION COEFFICIENT FO-FC      : 0.934                         
REMARK   3   CORRELATION COEFFICIENT FO-FC FREE : 0.903                         
REMARK   3                                                                      
REMARK   3  RMS DEVIATIONS FROM IDEAL VALUES        COUNT    RMS    WEIGHT      
REMARK   3   BOND LENGTHS REFINED ATOMS        (A):  3521 ; 0.009 ; 0.013       
REMARK   3   BOND LENGTHS OTHERS               (A):  3327 ; 0.036 ; 0.017       
REMARK   3   BOND ANGLES REFINED ATOMS   (DEGREES):  4752 ; 1.556 ; 1.614       
REMARK   3   BOND ANGLES OTHERS          (DEGREES):  7708 ; 2.368 ; 1.570       
REMARK   3   TORSION ANGLES, PERIOD 1    (DEGREES):   455 ; 5.971 ; 5.000       
REMARK   3   TORSION ANGLES, PERIOD 2    (DEGREES):   119 ;39.624 ;23.866       
REMARK   3   TORSION ANGLES, PERIOD 3    (DEGREES):   630 ;15.710 ;15.000       
REMARK   3   TORSION ANGLES, PERIOD 4    (DEGREES):     9 ;14.304 ;15.000       
REMARK   3   CHIRAL-CENTER RESTRAINTS       (A**3):   466 ; 0.072 ; 0.200       
REMARK   3   GENERAL PLANES REFINED ATOMS      (A):  3820 ; 0.007 ; 0.020       
REMARK   3   GENERAL PLANES OTHERS             (A):   643 ; 0.010 ; 0.020       
REMARK   3   NON-BONDED CONTACTS REFINED ATOMS (A):  NULL ;  NULL ;  NULL       
REMARK   3   NON-BONDED CONTACTS OTHERS        (A):  NULL ;  NULL ;  NULL       
REMARK   3   NON-BONDED TORSION REFINED ATOMS  (A):  NULL ;  NULL ;  NULL       
REMARK   3   NON-BONDED TORSION OTHERS         (A):  NULL ;  NULL ;  NULL       
REMARK   3   H-BOND (X...Y) REFINED ATOMS      (A):  NULL ;  NULL ;  NULL       
REMARK   3   H-BOND (X...Y) OTHERS             (A):  NULL ;  NULL ;  NULL       
REMARK   3   POTENTIAL METAL-ION REFINED ATOMS (A):  NULL ;  NULL ;  NULL       
REMARK   3   POTENTIAL METAL-ION OTHERS        (A):  NULL ;  NULL ;  NULL       
REMARK   3   SYMMETRY VDW REFINED ATOMS        (A):  NULL ;  NULL ;  NULL       
REMARK   3   SYMMETRY VDW OTHERS               (A):  NULL ;  NULL ;  NULL       
REMARK   3   SYMMETRY H-BOND REFINED ATOMS     (A):  NULL ;  NULL ;  NULL       
REMARK   3   SYMMETRY H-BOND OTHERS            (A):  NULL ;  NULL ;  NULL       
REMARK   3   SYMMETRY METAL-ION REFINED ATOMS  (A):  NULL ;  NULL ;  NULL       
REMARK   3   SYMMETRY METAL-ION OTHERS         (A):  NULL ;  NULL ;  NULL       
REMARK   3                                                                      
REMARK   3  ISOTROPIC THERMAL FACTOR RESTRAINTS.     COUNT   RMS    WEIGHT      
REMARK   3   MAIN-CHAIN BOND REFINED ATOMS  (A**2):  1839 ; 3.354 ; 3.972       
REMARK   3   MAIN-CHAIN BOND OTHER ATOMS    (A**2):  1838 ; 3.348 ; 3.970       
REMARK   3   MAIN-CHAIN ANGLE REFINED ATOMS (A**2):  2289 ; 4.856 ; 5.943       
REMARK   3   MAIN-CHAIN ANGLE OTHER ATOMS   (A**2):  NULL ;  NULL ;  NULL       
REMARK   3   SIDE-CHAIN BOND REFINED ATOMS  (A**2):  NULL ;  NULL ;  NULL       
REMARK   3   SIDE-CHAIN BOND OTHER ATOMS    (A**2):  NULL ;  NULL ;  NULL       
REMARK   3   SIDE-CHAIN ANGLE REFINED ATOMS (A**2):  NULL ;  NULL ;  NULL       
REMARK   3   SIDE-CHAIN ANGLE OTHER ATOMS   (A**2):  NULL ;  NULL ;  NULL       
REMARK   3   LONG RANGE B REFINED ATOMS     (A**2):  NULL ;  NULL ;  NULL       
REMARK   3   LONG RANGE B OTHER ATOMS       (A**2):  NULL ;  NULL ;  NULL       
REMARK   3                                                                      
REMARK   3 ANISOTROPIC THERMAL FACTOR RESTRAINTS.    COUNT   RMS   WEIGHT       
REMARK   3   RIGID-BOND RESTRAINTS          (A**2):  NULL ;  NULL ;  NULL       
REMARK   3   SPHERICITY; FREE ATOMS         (A**2):  NULL ;  NULL ;  NULL       
REMARK   3   SPHERICITY; BONDED ATOMS       (A**2):  NULL ;  NULL ;  NULL       
REMARK   3                                                                      
REMARK   3  NCS RESTRAINTS STATISTICS                                           
REMARK   3   NUMBER OF DIFFERENT NCS GROUPS : NULL                              
REMARK   3                                                                      
REMARK   3  TLS DETAILS                                                         
REMARK   3   NUMBER OF TLS GROUPS  : NULL                                       
REMARK   3                                                                      
REMARK   3  BULK SOLVENT MODELLING.                                             
REMARK   3   METHOD USED : MASK                                                 
REMARK   3   PARAMETERS FOR MASK CALCULATION                                    
REMARK   3   VDW PROBE RADIUS   : 1.20                                          
REMARK   3   ION PROBE RADIUS   : 0.80                                          
REMARK   3   SHRINKAGE RADIUS   : 0.80                                          
REMARK   3                                                                      
REMARK   3  OTHER REFINEMENT REMARKS: HYDROGENS HAVE BEEN ADDED IN THE RIDING   
REMARK   3  POSITIONS U VALUES : REFINED INDIVIDUALLY                           
REMARK   4                                                                      
REMARK   4 7XVZ COMPLIES WITH FORMAT V. 3.30, 13-JUL-11                         
REMARK 100                                                                      
REMARK 100 THIS ENTRY HAS BEEN PROCESSED BY PDBJ ON 01-JUN-22.                  
REMARK 100 THE DEPOSITION ID IS D_1300029738.                                   
REMARK 200                                                                      
REMARK 200 EXPERIMENTAL DETAILS                                                 
REMARK 200  EXPERIMENT TYPE                : X-RAY DIFFRACTION                  
REMARK 200  DATE OF DATA COLLECTION        : 20-MAY-19                          
REMARK 200  TEMPERATURE           (KELVIN) : 100                                
REMARK 200  PH                             : 6.5                                
REMARK 200  NUMBER OF CRYSTALS USED        : 1                                  
REMARK 200                                                                      
REMARK 200  SYNCHROTRON              (Y/N) : Y                                  
REMARK 200  RADIATION SOURCE               : PHOTON FACTORY                     
REMARK 200  BEAMLINE                       : BL-17A                             
REMARK 200  X-RAY GENERATOR MODEL          : NULL                               
REMARK 200  MONOCHROMATIC OR LAUE    (M/L) : M                                  
REMARK 200  WAVELENGTH OR RANGE        (A) : 0.9800                             
REMARK 200  MONOCHROMATOR                  : NULL                               
REMARK 200  OPTICS                         : NULL                               
REMARK 200                                                                      
REMARK 200  DETECTOR TYPE                  : PIXEL                              
REMARK 200  DETECTOR MANUFACTURER          : DECTRIS EIGER X 16M                
REMARK 200  INTENSITY-INTEGRATION SOFTWARE : XDS                                
REMARK 200  DATA SCALING SOFTWARE          : AIMLESS                            
REMARK 200                                                                      
REMARK 200  NUMBER OF UNIQUE REFLECTIONS   : 28068                              
REMARK 200  RESOLUTION RANGE HIGH      (A) : 2.080                              
REMARK 200  RESOLUTION RANGE LOW       (A) : 46.060                             
REMARK 200  REJECTION CRITERIA  (SIGMA(I)) : NULL                               
REMARK 200                                                                      
REMARK 200 OVERALL.                                                             
REMARK 200  COMPLETENESS FOR RANGE     (%) : 97.5                               
REMARK 200  DATA REDUNDANCY                : 6.400                              
REMARK 200  R MERGE                    (I) : NULL                               
REMARK 200  R SYM                      (I) : NULL                               
REMARK 200  <I/SIGMA(I)> FOR THE DATA SET  : 5.6000                             
REMARK 200                                                                      
REMARK 200 IN THE HIGHEST RESOLUTION SHELL.                                     
REMARK 200  HIGHEST RESOLUTION SHELL, RANGE HIGH (A) : 2.08                     
REMARK 200  HIGHEST RESOLUTION SHELL, RANGE LOW  (A) : 2.13                     
REMARK 200  COMPLETENESS FOR SHELL     (%) : NULL                               
REMARK 200  DATA REDUNDANCY IN SHELL       : NULL                               
REMARK 200  R MERGE FOR SHELL          (I) : NULL                               
REMARK 200  R SYM FOR SHELL            (I) : NULL                               
REMARK 200  <I/SIGMA(I)> FOR SHELL         : NULL                               
REMARK 200                                                                      
REMARK 200 DIFFRACTION PROTOCOL: SINGLE WAVELENGTH                              
REMARK 200 METHOD USED TO DETERMINE THE STRUCTURE: MOLECULAR REPLACEMENT        
REMARK 200 SOFTWARE USED: MOLREP                                                
REMARK 200 STARTING MODEL: 2GIU                                                 
REMARK 200                                                                      
REMARK 200 REMARK: NULL                                                         
REMARK 280                                                                      
REMARK 280 CRYSTAL                                                              
REMARK 280 SOLVENT CONTENT, VS   (%): 39.20                                     
REMARK 280 MATTHEWS COEFFICIENT, VM (ANGSTROMS**3/DA): 2.02                     
REMARK 280                                                                      
REMARK 280 CRYSTALLIZATION CONDITIONS: 16-20% PEG3350, 100 MM BISTRIS PH6.5,    
REMARK 280  200 MM MAGNESIUM ACETATE, VAPOR DIFFUSION, SITTING DROP,            
REMARK 280  TEMPERATURE 293K                                                    
REMARK 290                                                                      
REMARK 290 CRYSTALLOGRAPHIC SYMMETRY                                            
REMARK 290 SYMMETRY OPERATORS FOR SPACE GROUP: P 21 21 21                       
REMARK 290                                                                      
REMARK 290      SYMOP   SYMMETRY                                                
REMARK 290     NNNMMM   OPERATOR                                                
REMARK 290       1555   X,Y,Z                                                   
REMARK 290       2555   -X+1/2,-Y,Z+1/2                                         
REMARK 290       3555   -X,Y+1/2,-Z+1/2                                         
REMARK 290       4555   X+1/2,-Y+1/2,-Z                                         
REMARK 290                                                                      
REMARK 290     WHERE NNN -> OPERATOR NUMBER                                     
REMARK 290           MMM -> TRANSLATION VECTOR                                  
REMARK 290                                                                      
REMARK 290 CRYSTALLOGRAPHIC SYMMETRY TRANSFORMATIONS                            
REMARK 290 THE FOLLOWING TRANSFORMATIONS OPERATE ON THE ATOM/HETATM             
REMARK 290 RECORDS IN THIS ENTRY TO PRODUCE CRYSTALLOGRAPHICALLY                
REMARK 290 RELATED MOLECULES.                                                   
REMARK 290   SMTRY1   1  1.000000  0.000000  0.000000        0.00000            
REMARK 290   SMTRY2   1  0.000000  1.000000  0.000000        0.00000            
REMARK 290   SMTRY3   1  0.000000  0.000000  1.000000        0.00000            
REMARK 290   SMTRY1   2 -1.000000  0.000000  0.000000       25.86400            
REMARK 290   SMTRY2   2  0.000000 -1.000000  0.000000        0.00000            
REMARK 290   SMTRY3   2  0.000000  0.000000  1.000000       50.62600            
REMARK 290   SMTRY1   3 -1.000000  0.000000  0.000000        0.00000            
REMARK 290   SMTRY2   3  0.000000  1.000000  0.000000       44.29000            
REMARK 290   SMTRY3   3  0.000000  0.000000 -1.000000       50.62600            
REMARK 290   SMTRY1   4  1.000000  0.000000  0.000000       25.86400            
REMARK 290   SMTRY2   4  0.000000 -1.000000  0.000000       44.29000            
REMARK 290   SMTRY3   4  0.000000  0.000000 -1.000000        0.00000            
REMARK 290                                                                      
REMARK 290 REMARK: NULL                                                         
REMARK 300                                                                      
REMARK 300 BIOMOLECULE: 1                                                       
REMARK 300 SEE REMARK 350 FOR THE AUTHOR PROVIDED AND/OR PROGRAM                
REMARK 300 GENERATED ASSEMBLY INFORMATION FOR THE STRUCTURE IN                  
REMARK 300 THIS ENTRY. THE REMARK MAY ALSO PROVIDE INFORMATION ON               
REMARK 300 BURIED SURFACE AREA.                                                 
REMARK 350                                                                      
REMARK 350 COORDINATES FOR A COMPLETE MULTIMER REPRESENTING THE KNOWN           
REMARK 350 BIOLOGICALLY SIGNIFICANT OLIGOMERIZATION STATE OF THE                
REMARK 350 MOLECULE CAN BE GENERATED BY APPLYING BIOMT TRANSFORMATIONS          
REMARK 350 GIVEN BELOW.  BOTH NON-CRYSTALLOGRAPHIC AND                          
REMARK 350 CRYSTALLOGRAPHIC OPERATIONS ARE GIVEN.                               
REMARK 350                                                                      
REMARK 350 BIOMOLECULE: 1                                                       
REMARK 350 AUTHOR DETERMINED BIOLOGICAL UNIT: TETRAMERIC                        
REMARK 350 SOFTWARE DETERMINED QUATERNARY STRUCTURE: TETRAMERIC                 
REMARK 350 SOFTWARE USED: PISA                                                  
REMARK 350 TOTAL BURIED SURFACE AREA: 3470 ANGSTROM**2                          
REMARK 350 SURFACE AREA OF THE COMPLEX: 20090 ANGSTROM**2                       
REMARK 350 CHANGE IN SOLVENT FREE ENERGY: -35.0 KCAL/MOL                        
REMARK 350 APPLY THE FOLLOWING TO CHAINS: A, B, C, D                            
REMARK 350   BIOMT1   1  1.000000  0.000000  0.000000        0.00000            
REMARK 350   BIOMT2   1  0.000000  1.000000  0.000000        0.00000            
REMARK 350   BIOMT3   1  0.000000  0.000000  1.000000        0.00000            
REMARK 465                                                                      
REMARK 465 MISSING RESIDUES                                                     
REMARK 465 THE FOLLOWING RESIDUES WERE NOT LOCATED IN THE                       
REMARK 465 EXPERIMENT. (M=MODEL NUMBER; RES=RESIDUE NAME; C=CHAIN               
REMARK 465 IDENTIFIER; SSSEQ=SEQUENCE NUMBER; I=INSERTION CODE.)                
REMARK 465                                                                      
REMARK 465   M RES C SSSEQI                                                     
REMARK 465     GLY A   256                                                      
REMARK 465     PRO A   257                                                      
REMARK 465     LEU A   258                                                      
REMARK 465     GLY A   259                                                      
REMARK 465     SER A   260                                                      
REMARK 465     ASP A   261                                                      
REMARK 465     ALA A   262                                                      
REMARK 465     PRO A   285                                                      
REMARK 465     SER A   286                                                      
REMARK 465     ALA A   287                                                      
REMARK 465     PRO A   288                                                      
REMARK 465     PHE A   289                                                      
REMARK 465     THR A   290                                                      
REMARK 465     MET A   410                                                      
REMARK 465     TYR A   411                                                      
REMARK 465     PRO A   412                                                      
REMARK 465     LEU A   413                                                      
REMARK 465     VAL A   414                                                      
REMARK 465     THR A   415                                                      
REMARK 465     ALA A   416                                                      
REMARK 465     THR A   417                                                      
REMARK 465     GLN A   418                                                      
REMARK 465     ASP A   419                                                      
REMARK 465     ALA A   420                                                      
REMARK 465     VAL A   499                                                      
REMARK 465     LEU A   500                                                      
REMARK 465     ASP A   501                                                      
REMARK 465     ASP A   502                                                      
REMARK 465     GLY B   256                                                      
REMARK 465     PRO B   257                                                      
REMARK 465     LEU B   258                                                      
REMARK 465     GLY B   259                                                      
REMARK 465     SER B   260                                                      
REMARK 465     ASP B   261                                                      
REMARK 465     ALA B   262                                                      
REMARK 465     MET B   410                                                      
REMARK 465     TYR B   411                                                      
REMARK 465     PRO B   412                                                      
REMARK 465     LEU B   413                                                      
REMARK 465     VAL B   414                                                      
REMARK 465     THR B   415                                                      
REMARK 465     ALA B   416                                                      
REMARK 465     THR B   417                                                      
REMARK 465     GLN B   418                                                      
REMARK 465     ASP B   419                                                      
REMARK 465     ALA B   420                                                      
REMARK 465     VAL B   499                                                      
REMARK 465     LEU B   500                                                      
REMARK 465     ASP B   501                                                      
REMARK 465     ASP B   502                                                      
REMARK 465     SER C   601                                                      
REMARK 465     GLY C   602                                                      
REMARK 465     THR C   613                                                      
REMARK 465     SER D   601                                                      
REMARK 465     GLY D   602                                                      
REMARK 465     SER D   603                                                      
REMARK 470                                                                      
REMARK 470 MISSING ATOM                                                         
REMARK 470 THE FOLLOWING RESIDUES HAVE MISSING ATOMS (M=MODEL NUMBER;           
REMARK 470 RES=RESIDUE NAME; C=CHAIN IDENTIFIER; SSEQ=SEQUENCE NUMBER;          
REMARK 470 I=INSERTION CODE):                                                   
REMARK 470   M RES CSSEQI  ATOMS                                                
REMARK 470     LEU A 263    CD1  CD2                                            
REMARK 470     LEU A 270    CD1  CD2                                            
REMARK 470     HIS A 279    CB   CG   ND1  CD2  CE1  NE2                        
REMARK 470     ARG A 284    CA   C    O    CB   CG   CD   NE                    
REMARK 470     ARG A 284    CZ   NH1  NH2                                       
REMARK 470     GLU A 291    CB   CG   CD   OE1  OE2                             
REMARK 470     GLU A 321    OE1  OE2                                            
REMARK 470     ARG A 329    CD   NE   CZ   NH1  NH2                             
REMARK 470     GLU A 337    OE1  OE2                                            
REMARK 470     ARG A 364    CG   CD   NE   CZ   NH1  NH2                        
REMARK 470     ASP A 365    CB   CG   OD1  OD2                                  
REMARK 470     LYS A 368    CG   CD   CE   NZ                                   
REMARK 470     LEU A 374    CD1  CD2                                            
REMARK 470     MET A 379    CE                                                  
REMARK 470     ARG A 386    CD   NE   CZ   NH1  NH2                             
REMARK 470     ILE A 404    CG2  CD1                                            
REMARK 470     SER A 409    C    O    CB   OG                                   
REMARK 470     ASP A 421    CB   CG   OD1  OD2                                  
REMARK 470     ARG A 424    CB   CG   CD   NE   CZ   NH1  NH2                   
REMARK 470     LYS A 425    CG   CD   CE   NZ                                   
REMARK 470     LEU A 429    CD1  CD2                                            
REMARK 470     ASN A 431    OD1  ND2                                            
REMARK 470     ASP A 435    OD1  OD2                                            
REMARK 470     ARG A 466    CD   NE   CZ   NH1  NH2                             
REMARK 470     LYS A 471    CG   CD   CE   NZ                                   
REMARK 470     LEU A 477    CD1                                                 
REMARK 470     MET A 479    CE                                                  
REMARK 470     VAL A 487    CB   CG1  CG2                                       
REMARK 470     LEU A 492    CG   CD1  CD2                                       
REMARK 470     GLU A 493    CG   CD   OE1  OE2                                  
REMARK 470     MET A 494    CE                                                  
REMARK 470     LEU A 495    CD1  CD2                                            
REMARK 470     LEU B 263    CB   CG   CD1  CD2                                  
REMARK 470     GLU B 266    OE1  OE2                                            
REMARK 470     LEU B 270    CD1  CD2                                            
REMARK 470     HIS B 279    CB   CG   ND1  CD2  CE1  NE2                        
REMARK 470     SER B 283    CB   OG                                             
REMARK 470     GLU B 291    CG   CD   OE1  OE2                                  
REMARK 470     ILE B 310    CD1                                                 
REMARK 470     LYS B 315    CE   NZ                                             
REMARK 470     LEU B 324    CD1  CD2                                            
REMARK 470     ILE B 348    CD1                                                 
REMARK 470     ILE B 355    CD1                                                 
REMARK 470     LEU B 362    CG   CD1  CD2                                       
REMARK 470     ASP B 365    CG   OD1  OD2                                       
REMARK 470     VAL B 370    CG1  CG2                                            
REMARK 470     ILE B 373    CG2  CD1                                            
REMARK 470     LEU B 374    CD1  CD2                                            
REMARK 470     ARG B 386    CG   CD   NE   CZ   NH1  NH2                        
REMARK 470     VAL B 400    CG1  CG2                                            
REMARK 470     SER B 409    C    O    CB   OG                                   
REMARK 470     SER B 422    OG                                                  
REMARK 470     SER B 423    OG                                                  
REMARK 470     ARG B 424    CG   CD   NE   CZ   NH1  NH2                        
REMARK 470     ASN B 431    OD1  ND2                                            
REMARK 470     LYS B 443    CD   CE   NZ                                        
REMARK 470     SER B 448    OG                                                  
REMARK 470     LEU B 461    CD1  CD2                                            
REMARK 470     LEU B 462    CD1  CD2                                            
REMARK 470     SER B 463    OG                                                  
REMARK 470     ARG B 466    CD   NE   CZ   NH1  NH2                             
REMARK 470     LYS B 471    CD   CE   NZ                                        
REMARK 470     LEU B 477    CD1  CD2                                            
REMARK 470     ASN B 478    OD1                                                 
REMARK 470     ASN B 483    CB   CG   OD1  ND2                                  
REMARK 470     VAL B 484    CG1  CG2                                            
REMARK 470     VAL B 485    CB   CG1  CG2                                       
REMARK 470     VAL B 487    CB   CG1  CG2                                       
REMARK 470     TYR B 488    CB   CG   CD1  CD2  CE1  CE2  CZ                    
REMARK 470     TYR B 488    OH                                                  
REMARK 470     ASP B 489    CB   CG   OD1  OD2                                  
REMARK 470     LEU B 490    CD1  CD2                                            
REMARK 470     MET B 494    CE                                                  
REMARK 470     LEU B 495    CD1  CD2                                            
REMARK 470     HIS B 498    CA   C    O    CB   CG   ND1  CD2                   
REMARK 470     HIS B 498    CE1  NE2                                            
REMARK 470     HIS C 604    CG   ND1  CD2  CE1  NE2                             
REMARK 470     LYS C 605    CG   CD   CE   NZ                                   
REMARK 470     HIS D 604    CG   ND1  CD2  CE1  NE2                             
REMARK 470     LEU D 606    CD1                                                 
REMARK 470     THR D 612    OG1  CG2                                            
REMARK 470     THR D 613    OG1  CG2                                            
REMARK 500                                                                      
REMARK 500 GEOMETRY AND STEREOCHEMISTRY                                         
REMARK 500 SUBTOPIC: TORSION ANGLES                                             
REMARK 500                                                                      
REMARK 500 TORSION ANGLES OUTSIDE THE EXPECTED RAMACHANDRAN REGIONS:            
REMARK 500 (M=MODEL NUMBER; RES=RESIDUE NAME; C=CHAIN IDENTIFIER;               
REMARK 500 SSEQ=SEQUENCE NUMBER; I=INSERTION CODE).                             
REMARK 500                                                                      
REMARK 500 STANDARD TABLE:                                                      
REMARK 500 FORMAT:(10X,I3,1X,A3,1X,A1,I4,A1,4X,F7.2,3X,F7.2)                    
REMARK 500                                                                      
REMARK 500 EXPECTED VALUES: GJ KLEYWEGT AND TA JONES (1996). PHI/PSI-           
REMARK 500 CHOLOGY: RAMACHANDRAN REVISITED. STRUCTURE 4, 1395 - 1400            
REMARK 500                                                                      
REMARK 500  M RES CSSEQI        PSI       PHI                                   
REMARK 500    HIS A 350       69.50   -118.29                                   
REMARK 500    LEU A 392      125.31    -37.06                                   
REMARK 500    ASN B 483      -56.41     77.42                                   
REMARK 500    VAL B 484      -46.01    -21.21                                   
REMARK 500    ASP B 489      -78.56    -32.60                                   
REMARK 500    HIS C 604       41.78   -141.07                                   
REMARK 500                                                                      
REMARK 500 REMARK: NULL                                                         
REMARK 900                                                                      
REMARK 900 RELATED ENTRIES                                                      
REMARK 900 RELATED ID: 7XVY   RELATED DB: PDB                                   
DBREF  7XVZ A  261   500  UNP    Q92731   ESR2_HUMAN     261    500             
DBREF  7XVZ B  261   500  UNP    Q92731   ESR2_HUMAN     261    500             
DBREF  7XVZ C  601   613  PDB    7XVZ     7XVZ           601    613             
DBREF  7XVZ D  601   613  PDB    7XVZ     7XVZ           601    613             
SEQADV 7XVZ GLY A  256  UNP  Q92731              EXPRESSION TAG                 
SEQADV 7XVZ PRO A  257  UNP  Q92731              EXPRESSION TAG                 
SEQADV 7XVZ LEU A  258  UNP  Q92731              EXPRESSION TAG                 
SEQADV 7XVZ GLY A  259  UNP  Q92731              EXPRESSION TAG                 
SEQADV 7XVZ SER A  260  UNP  Q92731              EXPRESSION TAG                 
SEQADV 7XVZ SER A  334  UNP  Q92731    CYS   334 ENGINEERED MUTATION            
SEQADV 7XVZ SER A  369  UNP  Q92731    CYS   369 ENGINEERED MUTATION            
SEQADV 7XVZ SER A  481  UNP  Q92731    CYS   481 ENGINEERED MUTATION            
SEQADV 7XVZ ASP A  501  UNP  Q92731              EXPRESSION TAG                 
SEQADV 7XVZ ASP A  502  UNP  Q92731              EXPRESSION TAG                 
SEQADV 7XVZ GLY B  256  UNP  Q92731              EXPRESSION TAG                 
SEQADV 7XVZ PRO B  257  UNP  Q92731              EXPRESSION TAG                 
SEQADV 7XVZ LEU B  258  UNP  Q92731              EXPRESSION TAG                 
SEQADV 7XVZ GLY B  259  UNP  Q92731              EXPRESSION TAG                 
SEQADV 7XVZ SER B  260  UNP  Q92731              EXPRESSION TAG                 
SEQADV 7XVZ SER B  334  UNP  Q92731    CYS   334 ENGINEERED MUTATION            
SEQADV 7XVZ SER B  369  UNP  Q92731    CYS   369 ENGINEERED MUTATION            
SEQADV 7XVZ SER B  481  UNP  Q92731    CYS   481 ENGINEERED MUTATION            
SEQADV 7XVZ ASP B  501  UNP  Q92731              EXPRESSION TAG                 
SEQADV 7XVZ ASP B  502  UNP  Q92731              EXPRESSION TAG                 
SEQRES   1 A  247  GLY PRO LEU GLY SER ASP ALA LEU SER PRO GLU GLN LEU          
SEQRES   2 A  247  VAL LEU THR LEU LEU GLU ALA GLU PRO PRO HIS VAL LEU          
SEQRES   3 A  247  ILE SER ARG PRO SER ALA PRO PHE THR GLU ALA SER MET          
SEQRES   4 A  247  MET MET SER LEU THR LYS LEU ALA ASP LYS GLU LEU VAL          
SEQRES   5 A  247  HIS MET ILE SER TRP ALA LYS LYS ILE PRO GLY PHE VAL          
SEQRES   6 A  247  GLU LEU SER LEU PHE ASP GLN VAL ARG LEU LEU GLU SER          
SEQRES   7 A  247  SER TRP MET GLU VAL LEU MET MET GLY LEU MET TRP ARG          
SEQRES   8 A  247  SER ILE ASP HIS PRO GLY LYS LEU ILE PHE ALA PRO ASP          
SEQRES   9 A  247  LEU VAL LEU ASP ARG ASP GLU GLY LYS SER VAL GLU GLY          
SEQRES  10 A  247  ILE LEU GLU ILE PHE ASP MET LEU LEU ALA THR THR SER          
SEQRES  11 A  247  ARG PHE ARG GLU LEU LYS LEU GLN HIS LYS GLU TYR LEU          
SEQRES  12 A  247  CYS VAL LYS ALA MET ILE LEU LEU ASN SER SER MET TYR          
SEQRES  13 A  247  PRO LEU VAL THR ALA THR GLN ASP ALA ASP SER SER ARG          
SEQRES  14 A  247  LYS LEU ALA HIS LEU LEU ASN ALA VAL THR ASP ALA LEU          
SEQRES  15 A  247  VAL TRP VAL ILE ALA LYS SER GLY ILE SER SER GLN GLN          
SEQRES  16 A  247  GLN SER MET ARG LEU ALA ASN LEU LEU MET LEU LEU SER          
SEQRES  17 A  247  HIS VAL ARG HIS ALA SER ASN LYS GLY MET GLU HIS LEU          
SEQRES  18 A  247  LEU ASN MET LYS SER LYS ASN VAL VAL PRO VAL TYR ASP          
SEQRES  19 A  247  LEU LEU LEU GLU MET LEU ASN ALA HIS VAL LEU ASP ASP          
SEQRES   1 B  247  GLY PRO LEU GLY SER ASP ALA LEU SER PRO GLU GLN LEU          
SEQRES   2 B  247  VAL LEU THR LEU LEU GLU ALA GLU PRO PRO HIS VAL LEU          
SEQRES   3 B  247  ILE SER ARG PRO SER ALA PRO PHE THR GLU ALA SER MET          
SEQRES   4 B  247  MET MET SER LEU THR LYS LEU ALA ASP LYS GLU LEU VAL          
SEQRES   5 B  247  HIS MET ILE SER TRP ALA LYS LYS ILE PRO GLY PHE VAL          
SEQRES   6 B  247  GLU LEU SER LEU PHE ASP GLN VAL ARG LEU LEU GLU SER          
SEQRES   7 B  247  SER TRP MET GLU VAL LEU MET MET GLY LEU MET TRP ARG          
SEQRES   8 B  247  SER ILE ASP HIS PRO GLY LYS LEU ILE PHE ALA PRO ASP          
SEQRES   9 B  247  LEU VAL LEU ASP ARG ASP GLU GLY LYS SER VAL GLU GLY          
SEQRES  10 B  247  ILE LEU GLU ILE PHE ASP MET LEU LEU ALA THR THR SER          
SEQRES  11 B  247  ARG PHE ARG GLU LEU LYS LEU GLN HIS LYS GLU TYR LEU          
SEQRES  12 B  247  CYS VAL LYS ALA MET ILE LEU LEU ASN SER SER MET TYR          
SEQRES  13 B  247  PRO LEU VAL THR ALA THR GLN ASP ALA ASP SER SER ARG          
SEQRES  14 B  247  LYS LEU ALA HIS LEU LEU ASN ALA VAL THR ASP ALA LEU          
SEQRES  15 B  247  VAL TRP VAL ILE ALA LYS SER GLY ILE SER SER GLN GLN          
SEQRES  16 B  247  GLN SER MET ARG LEU ALA ASN LEU LEU MET LEU LEU SER          
SEQRES  17 B  247  HIS VAL ARG HIS ALA SER ASN LYS GLY MET GLU HIS LEU          
SEQRES  18 B  247  LEU ASN MET LYS SER LYS ASN VAL VAL PRO VAL TYR ASP          
SEQRES  19 B  247  LEU LEU LEU GLU MET LEU ASN ALA HIS VAL LEU ASP ASP          
SEQRES   1 C   13  SER GLY SER HIS LYS LEU VAL GLN LEU LEU THR THR THR          
SEQRES   1 D   13  SER GLY SER HIS LYS LEU VAL GLN LEU LEU THR THR THR          
HET    I1D  A 601      19                                                       
HET    I1D  B 601      19                                                       
HETNAM     I1D (2~{R})-3-(2-CHLORANYL-4-OXIDANYL-PHENYL)-2-(4-                  
HETNAM   2 I1D  HYDROXYPHENYL)PROPANENITRILE                                    
FORMUL   5  I1D    2(C15 H12 CL N O2)                                           
FORMUL   7  HOH   *10(H2 O)                                                     
HELIX    1 AA1 SER A  264  ALA A  275  1                                  12    
HELIX    2 AA2 ALA A  292  LYS A  315  1                                  24    
HELIX    3 AA3 GLY A  318  LEU A  322  5                                   5    
HELIX    4 AA4 SER A  323  ILE A  348  1                                  26    
HELIX    5 AA5 ASP A  363  LYS A  368  1                                   6    
HELIX    6 AA6 GLY A  372  LEU A  390  1                                  19    
HELIX    7 AA7 GLN A  393  ASN A  407  1                                  15    
HELIX    8 AA8 SER A  422  LYS A  443  1                                  22    
HELIX    9 AA9 SER A  447  LYS A  482  1                                  36    
HELIX   10 AB1 TYR A  488  HIS A  498  1                                  11    
HELIX   11 AB2 SER B  264  GLU B  276  1                                  13    
HELIX   12 AB3 THR B  290  LYS B  315  1                                  26    
HELIX   13 AB4 GLY B  318  LEU B  322  5                                   5    
HELIX   14 AB5 SER B  323  SER B  347  1                                  25    
HELIX   15 AB6 ASP B  365  VAL B  370  5                                   6    
HELIX   16 AB7 GLY B  372  LEU B  390  1                                  19    
HELIX   17 AB8 GLN B  393  ASN B  407  1                                  15    
HELIX   18 AB9 SER B  422  LYS B  443  1                                  22    
HELIX   19 AC1 SER B  447  LYS B  482  1                                  36    
HELIX   20 AC2 TYR B  488  ALA B  497  1                                  10    
HELIX   21 AC3 HIS C  604  THR C  612  1                                   9    
HELIX   22 AC4 LYS D  605  THR D  612  1                                   8    
SHEET    1 AA1 2 LEU A 354  ALA A 357  0                                        
SHEET    2 AA1 2 LEU A 360  LEU A 362 -1  O  LEU A 360   N  ALA A 357           
SHEET    1 AA2 2 LYS B 353  ALA B 357  0                                        
SHEET    2 AA2 2 LEU B 360  ASP B 363 -1  O  LEU B 362   N  LEU B 354           
CRYST1   51.728   88.580  101.252  90.00  90.00  90.00 P 21 21 21    8          
ORIGX1      1.000000  0.000000  0.000000        0.00000                         
ORIGX2      0.000000  1.000000  0.000000        0.00000                         
ORIGX3      0.000000  0.000000  1.000000        0.00000                         
SCALE1      0.019332  0.000000  0.000000        0.00000                         
SCALE2      0.000000  0.011289  0.000000        0.00000                         
SCALE3      0.000000  0.000000  0.009876        0.00000                         
ATOM      1  N   LEU A 263      27.805 -23.830 -41.536  1.00 53.85           N  
ATOM      2  CA  LEU A 263      27.304 -22.652 -42.363  1.00 56.57           C  
ATOM      3  C   LEU A 263      27.689 -21.333 -41.650  1.00 48.74           C  
ATOM      4  O   LEU A 263      27.273 -21.153 -40.507  1.00 45.25           O  
ATOM      5  CB  LEU A 263      25.783 -22.819 -42.532  1.00 53.86           C  
ATOM      6  CG  LEU A 263      25.172 -22.284 -43.825  1.00 51.16           C  
ATOM      7  N   SER A 264      28.459 -20.437 -42.275  1.00 42.92           N  
ATOM      8  CA  SER A 264      28.875 -19.149 -41.646  1.00 45.84           C  
ATOM      9  C   SER A 264      27.676 -18.217 -41.421  1.00 43.39           C  
ATOM     10  O   SER A 264      26.625 -18.377 -42.038  1.00 41.65           O  
ATOM     11  CB  SER A 264      29.948 -18.455 -42.452  1.00 44.21           C  
ATOM     12  OG  SER A 264      29.392 -17.762 -43.559  1.00 50.87           O  
ATOM     13  N   PRO A 265      27.784 -17.216 -40.516  1.00 36.33           N  
ATOM     14  CA  PRO A 265      26.768 -16.167 -40.379  1.00 38.10           C  
ATOM     15  C   PRO A 265      26.352 -15.474 -41.681  1.00 36.88           C  
ATOM     16  O   PRO A 265      25.166 -15.209 -41.829  1.00 30.94           O  
ATOM     17  CB  PRO A 265      27.438 -15.149 -39.457  1.00 38.20           C  
ATOM     18  CG  PRO A 265      28.318 -15.995 -38.592  1.00 37.12           C  
ATOM     19  CD  PRO A 265      28.815 -17.115 -39.488  1.00 34.52           C  
ATOM     20  N   GLU A 266      27.306 -15.266 -42.601  1.00 38.73           N  
ATOM     21  CA  GLU A 266      27.057 -14.598 -43.910  1.00 38.69           C  
ATOM     22  C   GLU A 266      26.237 -15.530 -44.818  1.00 35.54           C  
ATOM     23  O   GLU A 266      25.303 -15.067 -45.425  1.00 37.46           O  
ATOM     24  CB  GLU A 266      28.365 -14.167 -44.569  1.00 38.00           C  
ATOM     25  CG  GLU A 266      28.175 -13.219 -45.757  1.00 39.98           C  
ATOM     26  CD  GLU A 266      29.423 -12.854 -46.560  1.00 42.54           C  
ATOM     27  OE1 GLU A 266      30.392 -13.646 -46.571  1.00 46.82           O  
ATOM     28  OE2 GLU A 266      29.423 -11.777 -47.195  1.00 48.28           O  
ATOM     29  N   GLN A 267      26.599 -16.801 -44.905  1.00 40.24           N  
ATOM     30  CA  GLN A 267      25.860 -17.832 -45.672  1.00 42.29           C  
ATOM     31  C   GLN A 267      24.417 -17.893 -45.167  1.00 39.49           C  
ATOM     32  O   GLN A 267      23.514 -17.998 -46.018  1.00 35.37           O  
ATOM     33  CB  GLN A 267      26.516 -19.209 -45.506  1.00 48.21           C  
ATOM     34  CG  GLN A 267      27.845 -19.344 -46.251  1.00 56.33           C  
ATOM     35  CD  GLN A 267      28.605 -20.589 -45.850  1.00 59.72           C  
ATOM     36  OE1 GLN A 267      29.008 -20.746 -44.697  1.00 63.19           O  
ATOM     37  NE2 GLN A 267      28.806 -21.490 -46.803  1.00 61.48           N  
ATOM     38  N   LEU A 268      24.225 -17.878 -43.837  1.00 38.05           N  
ATOM     39  CA  LEU A 268      22.897 -17.978 -43.184  1.00 36.31           C  
ATOM     40  C   LEU A 268      22.076 -16.739 -43.545  1.00 36.03           C  
ATOM     41  O   LEU A 268      20.941 -16.884 -44.022  1.00 38.00           O  
ATOM     42  CB  LEU A 268      23.069 -18.118 -41.672  1.00 37.72           C  
ATOM     43  CG  LEU A 268      21.776 -18.193 -40.863  1.00 37.82           C  
ATOM     44  CD1 LEU A 268      20.779 -19.150 -41.505  1.00 42.10           C  
ATOM     45  CD2 LEU A 268      22.066 -18.609 -39.446  1.00 36.55           C  
ATOM     46  N   VAL A 269      22.639 -15.553 -43.358  1.00 36.52           N  
ATOM     47  CA  VAL A 269      21.915 -14.284 -43.659  1.00 32.18           C  
ATOM     48  C   VAL A 269      21.549 -14.253 -45.146  1.00 35.10           C  
ATOM     49  O   VAL A 269      20.416 -13.807 -45.436  1.00 29.00           O  
ATOM     50  CB  VAL A 269      22.748 -13.061 -43.259  1.00 30.51           C  
ATOM     51  CG1 VAL A 269      22.108 -11.773 -43.763  1.00 31.69           C  
ATOM     52  CG2 VAL A 269      22.937 -13.012 -41.756  1.00 30.62           C  
ATOM     53  N   LEU A 270      22.471 -14.689 -46.037  1.00 35.33           N  
ATOM     54  CA  LEU A 270      22.244 -14.737 -47.506  1.00 36.01           C  
ATOM     55  C   LEU A 270      21.100 -15.720 -47.773  1.00 33.22           C  
ATOM     56  O   LEU A 270      20.236 -15.379 -48.602  1.00 28.80           O  
ATOM     57  CB  LEU A 270      23.520 -15.103 -48.285  1.00 35.45           C  
ATOM     58  CG  LEU A 270      24.384 -13.916 -48.731  1.00 36.84           C  
ATOM     59  N   THR A 271      21.045 -16.851 -47.064  1.00 31.93           N  
ATOM     60  CA  THR A 271      19.925 -17.827 -47.215  1.00 35.84           C  
ATOM     61  C   THR A 271      18.594 -17.181 -46.791  1.00 35.97           C  
ATOM     62  O   THR A 271      17.584 -17.399 -47.478  1.00 30.56           O  
ATOM     63  CB  THR A 271      20.151 -19.131 -46.451  1.00 39.81           C  
ATOM     64  OG1 THR A 271      21.473 -19.616 -46.712  1.00 43.74           O  
ATOM     65  CG2 THR A 271      19.145 -20.181 -46.872  1.00 43.90           C  
ATOM     66  N   LEU A 272      18.593 -16.355 -45.745  1.00 35.94           N  
ATOM     67  CA  LEU A 272      17.387 -15.579 -45.339  1.00 35.19           C  
ATOM     68  C   LEU A 272      17.001 -14.586 -46.438  1.00 35.47           C  
ATOM     69  O   LEU A 272      15.805 -14.475 -46.714  1.00 34.90           O  
ATOM     70  CB  LEU A 272      17.640 -14.895 -43.989  1.00 33.54           C  
ATOM     71  CG  LEU A 272      17.831 -15.857 -42.812  1.00 30.89           C  
ATOM     72  CD1 LEU A 272      18.043 -15.102 -41.532  1.00 30.84           C  
ATOM     73  CD2 LEU A 272      16.641 -16.806 -42.673  1.00 32.18           C  
ATOM     74  N   LEU A 273      17.968 -13.911 -47.067  1.00 41.43           N  
ATOM     75  CA  LEU A 273      17.696 -12.929 -48.158  1.00 40.08           C  
ATOM     76  C   LEU A 273      16.950 -13.664 -49.276  1.00 43.61           C  
ATOM     77  O   LEU A 273      15.986 -13.114 -49.838  1.00 47.65           O  
ATOM     78  CB  LEU A 273      19.011 -12.330 -48.668  1.00 37.73           C  
ATOM     79  CG  LEU A 273      18.885 -11.128 -49.603  1.00 42.27           C  
ATOM     80  CD1 LEU A 273      18.300  -9.929 -48.886  1.00 45.30           C  
ATOM     81  CD2 LEU A 273      20.235 -10.753 -50.206  1.00 44.76           C  
ATOM     82  N   GLU A 274      17.388 -14.884 -49.560  1.00 46.75           N  
ATOM     83  CA  GLU A 274      16.841 -15.754 -50.628  1.00 47.62           C  
ATOM     84  C   GLU A 274      15.429 -16.195 -50.265  1.00 44.98           C  
ATOM     85  O   GLU A 274      14.587 -16.295 -51.170  1.00 45.60           O  
ATOM     86  CB  GLU A 274      17.768 -16.953 -50.799  1.00 53.34           C  
ATOM     87  CG  GLU A 274      19.053 -16.552 -51.479  1.00 57.51           C  
ATOM     88  CD  GLU A 274      18.774 -15.576 -52.602  1.00 59.83           C  
ATOM     89  OE1 GLU A 274      18.177 -16.010 -53.615  1.00 71.12           O  
ATOM     90  OE2 GLU A 274      19.085 -14.380 -52.435  1.00 70.26           O  
ATOM     91  N   ALA A 275      15.200 -16.421 -48.974  1.00 43.00           N  
ATOM     92  CA  ALA A 275      13.963 -16.990 -48.404  1.00 37.06           C  
ATOM     93  C   ALA A 275      12.874 -15.918 -48.345  1.00 34.94           C  
ATOM     94  O   ALA A 275      11.761 -16.267 -47.922  1.00 32.24           O  
ATOM     95  CB  ALA A 275      14.264 -17.549 -47.039  1.00 37.75           C  
ATOM     96  N   GLU A 276      13.177 -14.678 -48.756  1.00 32.46           N  
ATOM     97  CA  GLU A 276      12.289 -13.520 -48.503  1.00 33.95           C  
ATOM     98  C   GLU A 276      11.051 -13.633 -49.385  1.00 39.92           C  
ATOM     99  O   GLU A 276      11.187 -13.735 -50.595  1.00 44.70           O  
ATOM    100  CB  GLU A 276      13.004 -12.204 -48.785  1.00 32.59           C  
ATOM    101  CG  GLU A 276      13.589 -11.567 -47.550  1.00 34.08           C  
ATOM    102  CD  GLU A 276      12.535 -11.105 -46.568  1.00 33.36           C  
ATOM    103  OE1 GLU A 276      12.262 -11.811 -45.529  1.00 26.85           O  
ATOM    104  OE2 GLU A 276      11.997 -10.060 -46.843  1.00 39.05           O  
ATOM    105  N   PRO A 277       9.817 -13.551 -48.836  1.00 44.08           N  
ATOM    106  CA  PRO A 277       8.616 -13.652 -49.660  1.00 44.24           C  
ATOM    107  C   PRO A 277       8.529 -12.472 -50.616  1.00 42.66           C  
ATOM    108  O   PRO A 277       9.073 -11.419 -50.335  1.00 43.04           O  
ATOM    109  CB  PRO A 277       7.453 -13.609 -48.650  1.00 45.80           C  
ATOM    110  CG  PRO A 277       8.027 -12.930 -47.423  1.00 44.83           C  
ATOM    111  CD  PRO A 277       9.502 -13.283 -47.418  1.00 43.59           C  
ATOM    112  N   PRO A 278       7.802 -12.582 -51.747  1.00 47.66           N  
ATOM    113  CA  PRO A 278       7.640 -11.453 -52.663  1.00 49.18           C  
ATOM    114  C   PRO A 278       6.654 -10.428 -52.094  1.00 45.97           C  
ATOM    115  O   PRO A 278       5.940 -10.795 -51.201  1.00 46.09           O  
ATOM    116  CB  PRO A 278       7.057 -12.139 -53.900  1.00 50.45           C  
ATOM    117  CG  PRO A 278       6.205 -13.230 -53.312  1.00 47.36           C  
ATOM    118  CD  PRO A 278       7.033 -13.761 -52.166  1.00 46.18           C  
ATOM    119  N   HIS A 279       6.620  -9.207 -52.632  1.00 49.57           N  
ATOM    120  CA  HIS A 279       5.591  -8.183 -52.300  1.00 53.63           C  
ATOM    121  C   HIS A 279       4.224  -8.779 -52.662  1.00 53.20           C  
ATOM    122  O   HIS A 279       4.102  -9.288 -53.785  1.00 58.91           O  
ATOM    123  N   VAL A 280       3.281  -8.809 -51.719  1.00 49.77           N  
ATOM    124  CA  VAL A 280       1.908  -9.377 -51.890  1.00 49.82           C  
ATOM    125  C   VAL A 280       0.920  -8.215 -52.100  1.00 48.50           C  
ATOM    126  O   VAL A 280       0.923  -7.305 -51.264  1.00 56.19           O  
ATOM    127  CB  VAL A 280       1.516 -10.220 -50.661  1.00 49.58           C  
ATOM    128  CG1 VAL A 280       0.196 -10.941 -50.867  1.00 54.75           C  
ATOM    129  CG2 VAL A 280       2.597 -11.213 -50.262  1.00 50.63           C  
ATOM    130  N   LEU A 281       0.105  -8.237 -53.164  1.00 49.45           N  
ATOM    131  CA  LEU A 281      -0.991  -7.253 -53.411  1.00 49.27           C  
ATOM    132  C   LEU A 281      -2.358  -7.908 -53.179  1.00 55.22           C  
ATOM    133  O   LEU A 281      -2.477  -9.112 -53.442  1.00 56.26           O  
ATOM    134  CB  LEU A 281      -0.884  -6.740 -54.843  1.00 48.67           C  
ATOM    135  CG  LEU A 281       0.188  -5.676 -55.049  1.00 50.77           C  
ATOM    136  CD1 LEU A 281       1.420  -6.287 -55.698  1.00 49.97           C  
ATOM    137  CD2 LEU A 281      -0.357  -4.514 -55.870  1.00 50.64           C  
ATOM    138  N   ILE A 282      -3.363  -7.146 -52.741  1.00 56.32           N  
ATOM    139  CA  ILE A 282      -4.697  -7.697 -52.343  1.00 63.04           C  
ATOM    140  C   ILE A 282      -5.629  -7.767 -53.576  1.00 71.96           C  
ATOM    141  O   ILE A 282      -6.432  -8.728 -53.649  1.00 82.49           O  
ATOM    142  CB  ILE A 282      -5.303  -6.907 -51.155  1.00 56.24           C  
ATOM    143  CG1 ILE A 282      -6.024  -5.640 -51.602  1.00 53.69           C  
ATOM    144  CG2 ILE A 282      -4.257  -6.571 -50.102  1.00 52.50           C  
ATOM    145  CD1 ILE A 282      -6.520  -4.820 -50.451  1.00 57.83           C  
ATOM    146  N   SER A 283      -5.548  -6.796 -54.497  1.00 74.51           N  
ATOM    147  CA  SER A 283      -6.333  -6.703 -55.765  1.00 72.40           C  
ATOM    148  C   SER A 283      -7.803  -6.325 -55.499  1.00 76.00           C  
ATOM    149  O   SER A 283      -8.642  -6.624 -56.367  1.00 90.97           O  
ATOM    150  CB  SER A 283      -6.230  -7.971 -56.581  1.00 61.69           C  
ATOM    151  OG  SER A 283      -4.869  -8.351 -56.755  1.00 61.44           O  
ATOM    152  N   ARG A 284      -8.099  -5.654 -54.379  1.00 65.98           N  
ATOM    153  N   GLU A 291     -15.162   0.829 -43.809  1.00 84.41           N  
ATOM    154  CA  GLU A 291     -15.562   0.151 -42.546  1.00 75.57           C  
ATOM    155  C   GLU A 291     -15.244  -1.348 -42.649  1.00 79.10           C  
ATOM    156  O   GLU A 291     -14.306  -1.795 -41.969  1.00 85.49           O  
ATOM    157  N   ALA A 292     -15.996  -2.094 -43.469  1.00 72.63           N  
ATOM    158  CA  ALA A 292     -15.859  -3.559 -43.673  1.00 68.90           C  
ATOM    159  C   ALA A 292     -14.775  -3.863 -44.728  1.00 68.34           C  
ATOM    160  O   ALA A 292     -14.018  -4.845 -44.553  1.00 63.47           O  
ATOM    161  CB  ALA A 292     -17.196  -4.140 -44.067  1.00 65.96           C  
ATOM    162  N   SER A 293     -14.706  -3.060 -45.793  1.00 60.15           N  
ATOM    163  CA  SER A 293     -13.697  -3.161 -46.879  1.00 59.60           C  
ATOM    164  C   SER A 293     -12.280  -3.265 -46.274  1.00 55.41           C  
ATOM    165  O   SER A 293     -11.514  -4.156 -46.681  1.00 52.83           O  
ATOM    166  CB  SER A 293     -13.850  -1.989 -47.833  1.00 57.14           C  
ATOM    167  OG  SER A 293     -12.801  -1.942 -48.788  1.00 58.61           O  
ATOM    168  N   MET A 294     -11.941  -2.396 -45.321  1.00 51.54           N  
ATOM    169  CA  MET A 294     -10.601  -2.370 -44.678  1.00 47.14           C  
ATOM    170  C   MET A 294     -10.327  -3.763 -44.112  1.00 43.04           C  
ATOM    171  O   MET A 294      -9.363  -4.421 -44.531  1.00 37.08           O  
ATOM    172  CB  MET A 294     -10.538  -1.342 -43.544  1.00 44.45           C  
ATOM    173  CG  MET A 294      -9.163  -1.241 -42.948  1.00 47.71           C  
ATOM    174  SD  MET A 294      -8.948   0.134 -41.828  1.00 50.96           S  
ATOM    175  CE  MET A 294      -9.905  -0.412 -40.415  1.00 54.68           C  
ATOM    176  N   MET A 295     -11.225  -4.201 -43.243  1.00 42.44           N  
ATOM    177  CA  MET A 295     -11.124  -5.465 -42.489  1.00 46.01           C  
ATOM    178  C   MET A 295     -11.206  -6.673 -43.423  1.00 41.80           C  
ATOM    179  O   MET A 295     -10.683  -7.713 -43.046  1.00 43.37           O  
ATOM    180  CB  MET A 295     -12.226  -5.491 -41.433  1.00 43.95           C  
ATOM    181  CG  MET A 295     -12.004  -4.388 -40.420  1.00 51.65           C  
ATOM    182  SD  MET A 295     -10.372  -4.510 -39.556  1.00 52.10           S  
ATOM    183  CE  MET A 295     -10.498  -6.205 -38.988  1.00 48.21           C  
ATOM    184  N   MET A 296     -11.818  -6.536 -44.596  1.00 46.32           N  
ATOM    185  CA  MET A 296     -11.856  -7.622 -45.615  1.00 51.73           C  
ATOM    186  C   MET A 296     -10.478  -7.721 -46.285  1.00 45.12           C  
ATOM    187  O   MET A 296     -10.021  -8.865 -46.586  1.00 38.03           O  
ATOM    188  CB  MET A 296     -12.909  -7.344 -46.692  1.00 59.21           C  
ATOM    189  CG  MET A 296     -13.299  -8.599 -47.465  1.00 70.05           C  
ATOM    190  SD  MET A 296     -13.928  -8.253 -49.137  1.00 89.12           S  
ATOM    191  CE  MET A 296     -15.174  -7.017 -48.764  1.00 87.43           C  
ATOM    192  N   SER A 297      -9.868  -6.557 -46.529  1.00 36.32           N  
ATOM    193  CA  SER A 297      -8.528  -6.395 -47.133  1.00 39.19           C  
ATOM    194  C   SER A 297      -7.438  -7.038 -46.251  1.00 36.39           C  
ATOM    195  O   SER A 297      -6.637  -7.840 -46.784  1.00 36.70           O  
ATOM    196  CB  SER A 297      -8.286  -4.952 -47.391  1.00 41.74           C  
ATOM    197  OG  SER A 297      -9.149  -4.514 -48.420  1.00 42.93           O  
ATOM    198  N   LEU A 298      -7.470  -6.769 -44.951  1.00 33.36           N  
ATOM    199  CA  LEU A 298      -6.444  -7.198 -43.969  1.00 32.69           C  
ATOM    200  C   LEU A 298      -6.490  -8.721 -43.809  1.00 35.61           C  
ATOM    201  O   LEU A 298      -5.404  -9.352 -43.667  1.00 36.96           O  
ATOM    202  CB  LEU A 298      -6.684  -6.473 -42.635  1.00 32.65           C  
ATOM    203  CG  LEU A 298      -6.451  -4.957 -42.637  1.00 31.57           C  
ATOM    204  CD1 LEU A 298      -6.777  -4.337 -41.282  1.00 29.69           C  
ATOM    205  CD2 LEU A 298      -5.018  -4.638 -43.022  1.00 31.92           C  
ATOM    206  N   THR A 299      -7.687  -9.306 -43.785  1.00 34.53           N  
ATOM    207  CA  THR A 299      -7.831 -10.758 -43.549  1.00 34.77           C  
ATOM    208  C   THR A 299      -7.411 -11.438 -44.845  1.00 33.20           C  
ATOM    209  O   THR A 299      -6.741 -12.476 -44.761  1.00 29.94           O  
ATOM    210  CB  THR A 299      -9.225 -11.137 -43.039  1.00 32.66           C  
ATOM    211  OG1 THR A 299     -10.203 -10.690 -43.972  1.00 35.10           O  
ATOM    212  CG2 THR A 299      -9.492 -10.518 -41.691  1.00 35.52           C  
ATOM    213  N   LYS A 300      -7.744 -10.828 -45.987  1.00 32.51           N  
ATOM    214  CA  LYS A 300      -7.355 -11.388 -47.313  1.00 37.30           C  
ATOM    215  C   LYS A 300      -5.822 -11.341 -47.449  1.00 30.82           C  
ATOM    216  O   LYS A 300      -5.253 -12.359 -47.850  1.00 31.53           O  
ATOM    217  CB  LYS A 300      -8.077 -10.673 -48.463  1.00 38.20           C  
ATOM    218  CG  LYS A 300      -8.072 -11.443 -49.774  1.00 41.71           C  
ATOM    219  CD  LYS A 300      -8.061 -10.541 -50.988  1.00 46.35           C  
ATOM    220  CE  LYS A 300      -8.155 -11.287 -52.299  1.00 50.09           C  
ATOM    221  NZ  LYS A 300      -8.859 -10.464 -53.311  1.00 54.44           N  
ATOM    222  N   LEU A 301      -5.194 -10.199 -47.133  1.00 29.37           N  
ATOM    223  CA  LEU A 301      -3.715  -9.999 -47.105  1.00 28.50           C  
ATOM    224  C   LEU A 301      -3.084 -11.055 -46.187  1.00 28.63           C  
ATOM    225  O   LEU A 301      -2.134 -11.720 -46.618  1.00 27.06           O  
ATOM    226  CB  LEU A 301      -3.372  -8.610 -46.557  1.00 28.33           C  
ATOM    227  CG  LEU A 301      -1.881  -8.268 -46.566  1.00 29.36           C  
ATOM    228  CD1 LEU A 301      -1.253  -8.573 -47.923  1.00 30.85           C  
ATOM    229  CD2 LEU A 301      -1.638  -6.801 -46.190  1.00 27.10           C  
ATOM    230  N   ALA A 302      -3.596 -11.173 -44.959  1.00 24.96           N  
ATOM    231  CA  ALA A 302      -3.016 -12.036 -43.916  1.00 26.84           C  
ATOM    232  C   ALA A 302      -3.005 -13.469 -44.458  1.00 30.86           C  
ATOM    233  O   ALA A 302      -1.942 -14.150 -44.315  1.00 30.57           O  
ATOM    234  CB  ALA A 302      -3.797 -11.891 -42.634  1.00 27.86           C  
ATOM    235  N   ASP A 303      -4.116 -13.875 -45.106  1.00 32.49           N  
ATOM    236  CA  ASP A 303      -4.305 -15.250 -45.636  1.00 30.55           C  
ATOM    237  C   ASP A 303      -3.293 -15.445 -46.761  1.00 29.84           C  
ATOM    238  O   ASP A 303      -2.570 -16.445 -46.688  1.00 31.70           O  
ATOM    239  CB  ASP A 303      -5.743 -15.575 -46.075  1.00 31.75           C  
ATOM    240  CG  ASP A 303      -5.927 -17.046 -46.472  1.00 33.32           C  
ATOM    241  OD1 ASP A 303      -5.918 -17.928 -45.599  1.00 36.85           O  
ATOM    242  OD2 ASP A 303      -6.016 -17.309 -47.649  1.00 38.92           O  
ATOM    243  N   LYS A 304      -3.197 -14.530 -47.724  1.00 30.25           N  
ATOM    244  CA  LYS A 304      -2.163 -14.647 -48.796  1.00 32.60           C  
ATOM    245  C   LYS A 304      -0.759 -14.704 -48.179  1.00 30.27           C  
ATOM    246  O   LYS A 304       0.034 -15.566 -48.594  1.00 29.46           O  
ATOM    247  CB  LYS A 304      -2.229 -13.498 -49.798  1.00 37.65           C  
ATOM    248  CG  LYS A 304      -3.419 -13.551 -50.741  1.00 46.99           C  
ATOM    249  CD  LYS A 304      -3.435 -12.431 -51.761  1.00 55.92           C  
ATOM    250  CE  LYS A 304      -2.361 -12.609 -52.814  1.00 61.49           C  
ATOM    251  NZ  LYS A 304      -2.506 -11.613 -53.902  1.00 64.27           N  
ATOM    252  N   GLU A 305      -0.454 -13.831 -47.217  1.00 29.61           N  
ATOM    253  CA  GLU A 305       0.904 -13.750 -46.605  1.00 28.76           C  
ATOM    254  C   GLU A 305       1.222 -15.041 -45.862  1.00 29.31           C  
ATOM    255  O   GLU A 305       2.390 -15.426 -45.833  1.00 32.75           O  
ATOM    256  CB  GLU A 305       1.018 -12.567 -45.661  1.00 27.89           C  
ATOM    257  CG  GLU A 305       1.140 -11.265 -46.395  1.00 30.48           C  
ATOM    258  CD  GLU A 305       1.591 -10.108 -45.527  1.00 36.71           C  
ATOM    259  OE1 GLU A 305       2.811  -9.797 -45.512  1.00 36.53           O  
ATOM    260  OE2 GLU A 305       0.714  -9.512 -44.874  1.00 39.30           O  
ATOM    261  N   LEU A 306       0.220 -15.700 -45.284  1.00 29.81           N  
ATOM    262  CA  LEU A 306       0.487 -16.911 -44.473  1.00 28.25           C  
ATOM    263  C   LEU A 306       1.033 -18.027 -45.371  1.00 27.53           C  
ATOM    264  O   LEU A 306       1.879 -18.817 -44.905  1.00 27.13           O  
ATOM    265  CB  LEU A 306      -0.787 -17.315 -43.733  1.00 29.14           C  
ATOM    266  CG  LEU A 306      -1.047 -16.572 -42.420  1.00 31.55           C  
ATOM    267  CD1 LEU A 306      -2.355 -17.036 -41.814  1.00 30.63           C  
ATOM    268  CD2 LEU A 306       0.084 -16.767 -41.409  1.00 31.67           C  
ATOM    269  N   VAL A 307       0.591 -18.078 -46.614  1.00 27.33           N  
ATOM    270  CA  VAL A 307       1.068 -19.060 -47.632  1.00 30.86           C  
ATOM    271  C   VAL A 307       2.560 -18.818 -47.899  1.00 28.37           C  
ATOM    272  O   VAL A 307       3.297 -19.764 -47.844  1.00 27.63           O  
ATOM    273  CB  VAL A 307       0.235 -18.955 -48.932  1.00 30.34           C  
ATOM    274  CG1 VAL A 307       0.778 -19.857 -50.037  1.00 28.06           C  
ATOM    275  CG2 VAL A 307      -1.221 -19.255 -48.647  1.00 31.03           C  
ATOM    276  N   HIS A 308       2.965 -17.579 -48.193  1.00 29.56           N  
ATOM    277  CA  HIS A 308       4.378 -17.192 -48.446  1.00 30.61           C  
ATOM    278  C   HIS A 308       5.244 -17.472 -47.218  1.00 31.03           C  
ATOM    279  O   HIS A 308       6.431 -17.830 -47.433  1.00 29.68           O  
ATOM    280  CB  HIS A 308       4.496 -15.719 -48.880  1.00 32.01           C  
ATOM    281  CG  HIS A 308       3.908 -15.523 -50.235  1.00 36.08           C  
ATOM    282  ND1 HIS A 308       4.486 -16.087 -51.366  1.00 38.74           N  
ATOM    283  CD2 HIS A 308       2.780 -14.895 -50.641  1.00 37.52           C  
ATOM    284  CE1 HIS A 308       3.753 -15.776 -52.416  1.00 44.09           C  
ATOM    285  NE2 HIS A 308       2.685 -15.067 -51.993  1.00 39.72           N  
ATOM    286  N   MET A 309       4.673 -17.304 -46.018  1.00 25.74           N  
ATOM    287  CA  MET A 309       5.377 -17.458 -44.726  1.00 26.98           C  
ATOM    288  C   MET A 309       5.789 -18.922 -44.502  1.00 28.01           C  
ATOM    289  O   MET A 309       6.836 -19.161 -43.825  1.00 29.57           O  
ATOM    290  CB  MET A 309       4.500 -16.989 -43.564  1.00 26.55           C  
ATOM    291  CG  MET A 309       5.256 -16.931 -42.244  1.00 25.67           C  
ATOM    292  SD  MET A 309       4.117 -16.693 -40.850  1.00 31.01           S  
ATOM    293  CE  MET A 309       3.538 -15.042 -41.248  1.00 30.01           C  
ATOM    294  N   ILE A 310       5.046 -19.883 -45.045  1.00 25.18           N  
ATOM    295  CA  ILE A 310       5.378 -21.309 -44.818  1.00 29.00           C  
ATOM    296  C   ILE A 310       6.516 -21.706 -45.759  1.00 30.05           C  
ATOM    297  O   ILE A 310       7.395 -22.441 -45.289  1.00 34.02           O  
ATOM    298  CB  ILE A 310       4.138 -22.201 -44.955  1.00 31.92           C  
ATOM    299  CG1 ILE A 310       3.050 -21.739 -43.977  1.00 29.95           C  
ATOM    300  CG2 ILE A 310       4.495 -23.680 -44.767  1.00 29.75           C  
ATOM    301  CD1 ILE A 310       1.694 -21.988 -44.527  1.00 31.97           C  
ATOM    302  N   SER A 311       6.527 -21.215 -47.001  1.00 30.85           N  
ATOM    303  CA  SER A 311       7.700 -21.331 -47.911  1.00 33.72           C  
ATOM    304  C   SER A 311       8.932 -20.696 -47.249  1.00 31.69           C  
ATOM    305  O   SER A 311       9.956 -21.354 -47.180  1.00 33.55           O  
ATOM    306  CB  SER A 311       7.450 -20.696 -49.234  1.00 35.29           C  
ATOM    307  OG  SER A 311       6.190 -21.089 -49.704  1.00 44.29           O  
ATOM    308  N   TRP A 312       8.810 -19.472 -46.742  1.00 28.02           N  
ATOM    309  CA  TRP A 312       9.920 -18.752 -46.067  1.00 29.87           C  
ATOM    310  C   TRP A 312      10.509 -19.580 -44.913  1.00 32.98           C  
ATOM    311  O   TRP A 312      11.734 -19.720 -44.894  1.00 29.61           O  
ATOM    312  CB  TRP A 312       9.429 -17.410 -45.560  1.00 28.45           C  
ATOM    313  CG  TRP A 312      10.325 -16.801 -44.538  1.00 28.34           C  
ATOM    314  CD1 TRP A 312      11.477 -16.112 -44.772  1.00 29.39           C  
ATOM    315  CD2 TRP A 312      10.081 -16.708 -43.129  1.00 26.64           C  
ATOM    316  NE1 TRP A 312      11.977 -15.615 -43.601  1.00 28.43           N  
ATOM    317  CE2 TRP A 312      11.150 -15.969 -42.576  1.00 27.50           C  
ATOM    318  CE3 TRP A 312       9.090 -17.207 -42.279  1.00 26.30           C  
ATOM    319  CZ2 TRP A 312      11.252 -15.704 -41.214  1.00 28.47           C  
ATOM    320  CZ3 TRP A 312       9.172 -16.929 -40.932  1.00 27.97           C  
ATOM    321  CH2 TRP A 312      10.229 -16.170 -40.415  1.00 29.12           C  
ATOM    322  N   ALA A 313       9.651 -20.097 -44.009  1.00 30.72           N  
ATOM    323  CA  ALA A 313      10.024 -20.922 -42.842  1.00 29.06           C  
ATOM    324  C   ALA A 313      10.819 -22.150 -43.294  1.00 34.45           C  
ATOM    325  O   ALA A 313      11.911 -22.421 -42.693  1.00 35.01           O  
ATOM    326  CB  ALA A 313       8.797 -21.313 -42.092  1.00 29.21           C  
ATOM    327  N   LYS A 314      10.332 -22.834 -44.329  1.00 32.70           N  
ATOM    328  CA  LYS A 314      10.948 -24.074 -44.889  1.00 37.66           C  
ATOM    329  C   LYS A 314      12.313 -23.806 -45.523  1.00 37.12           C  
ATOM    330  O   LYS A 314      13.092 -24.754 -45.651  1.00 37.86           O  
ATOM    331  CB  LYS A 314      10.113 -24.656 -46.027  1.00 37.93           C  
ATOM    332  CG  LYS A 314       8.823 -25.341 -45.633  1.00 39.47           C  
ATOM    333  CD  LYS A 314       7.926 -25.541 -46.831  1.00 40.59           C  
ATOM    334  CE  LYS A 314       8.067 -26.925 -47.415  1.00 40.20           C  
ATOM    335  NZ  LYS A 314       7.293 -27.039 -48.675  1.00 44.58           N  
ATOM    336  N   LYS A 315      12.569 -22.580 -45.963  1.00 38.96           N  
ATOM    337  CA  LYS A 315      13.889 -22.199 -46.523  1.00 37.10           C  
ATOM    338  C   LYS A 315      14.829 -21.677 -45.426  1.00 36.05           C  
ATOM    339  O   LYS A 315      15.959 -21.313 -45.794  1.00 35.19           O  
ATOM    340  CB  LYS A 315      13.716 -21.139 -47.603  1.00 36.15           C  
ATOM    341  CG  LYS A 315      12.980 -21.608 -48.832  1.00 35.11           C  
ATOM    342  CD  LYS A 315      12.630 -20.453 -49.690  1.00 39.63           C  
ATOM    343  CE  LYS A 315      11.588 -20.787 -50.734  1.00 48.80           C  
ATOM    344  NZ  LYS A 315      10.812 -19.577 -51.103  1.00 56.25           N  
ATOM    345  N   ILE A 316      14.403 -21.621 -44.154  1.00 34.64           N  
ATOM    346  CA  ILE A 316      15.335 -21.365 -43.009  1.00 35.95           C  
ATOM    347  C   ILE A 316      16.160 -22.634 -42.813  1.00 35.89           C  
ATOM    348  O   ILE A 316      15.619 -23.685 -42.499  1.00 34.68           O  
ATOM    349  CB  ILE A 316      14.639 -20.972 -41.695  1.00 30.51           C  
ATOM    350  CG1 ILE A 316      13.890 -19.647 -41.829  1.00 31.61           C  
ATOM    351  CG2 ILE A 316      15.667 -20.947 -40.569  1.00 33.46           C  
ATOM    352  CD1 ILE A 316      12.942 -19.334 -40.685  1.00 29.30           C  
ATOM    353  N   PRO A 317      17.494 -22.586 -43.003  1.00 39.97           N  
ATOM    354  CA  PRO A 317      18.312 -23.795 -42.873  1.00 38.99           C  
ATOM    355  C   PRO A 317      17.968 -24.479 -41.542  1.00 36.61           C  
ATOM    356  O   PRO A 317      17.851 -23.778 -40.563  1.00 40.66           O  
ATOM    357  CB  PRO A 317      19.750 -23.253 -42.892  1.00 39.60           C  
ATOM    358  CG  PRO A 317      19.645 -21.950 -43.660  1.00 39.27           C  
ATOM    359  CD  PRO A 317      18.282 -21.384 -43.326  1.00 37.38           C  
ATOM    360  N   GLY A 318      17.719 -25.784 -41.561  1.00 33.01           N  
ATOM    361  CA  GLY A 318      17.421 -26.576 -40.362  1.00 34.55           C  
ATOM    362  C   GLY A 318      15.941 -26.721 -40.077  1.00 36.61           C  
ATOM    363  O   GLY A 318      15.566 -27.703 -39.410  1.00 43.60           O  
ATOM    364  N   PHE A 319      15.104 -25.802 -40.540  1.00 36.71           N  
ATOM    365  CA  PHE A 319      13.677 -25.737 -40.145  1.00 32.72           C  
ATOM    366  C   PHE A 319      12.952 -27.049 -40.471  1.00 37.16           C  
ATOM    367  O   PHE A 319      12.234 -27.566 -39.574  1.00 37.51           O  
ATOM    368  CB  PHE A 319      12.959 -24.572 -40.818  1.00 29.59           C  
ATOM    369  CG  PHE A 319      11.589 -24.350 -40.241  1.00 32.13           C  
ATOM    370  CD1 PHE A 319      11.437 -23.754 -38.999  1.00 33.20           C  
ATOM    371  CD2 PHE A 319      10.453 -24.803 -40.895  1.00 33.58           C  
ATOM    372  CE1 PHE A 319      10.178 -23.552 -38.459  1.00 33.03           C  
ATOM    373  CE2 PHE A 319       9.194 -24.597 -40.346  1.00 32.70           C  
ATOM    374  CZ  PHE A 319       9.058 -23.990 -39.123  1.00 30.76           C  
ATOM    375  N   VAL A 320      13.093 -27.563 -41.699  1.00 38.98           N  
ATOM    376  CA  VAL A 320      12.402 -28.814 -42.140  1.00 40.77           C  
ATOM    377  C   VAL A 320      13.052 -30.040 -41.504  1.00 40.38           C  
ATOM    378  O   VAL A 320      12.507 -31.121 -41.731  1.00 41.08           O  
ATOM    379  CB  VAL A 320      12.366 -28.980 -43.668  1.00 44.24           C  
ATOM    380  CG1 VAL A 320      11.740 -27.757 -44.323  1.00 44.59           C  
ATOM    381  CG2 VAL A 320      13.744 -29.300 -44.249  1.00 41.94           C  
ATOM    382  N   GLU A 321      14.164 -29.889 -40.768  1.00 40.64           N  
ATOM    383  CA  GLU A 321      14.809 -31.018 -40.042  1.00 41.07           C  
ATOM    384  C   GLU A 321      14.139 -31.146 -38.681  1.00 42.29           C  
ATOM    385  O   GLU A 321      14.231 -32.227 -38.087  1.00 50.08           O  
ATOM    386  CB  GLU A 321      16.321 -30.849 -39.913  1.00 41.19           C  
ATOM    387  CG  GLU A 321      17.053 -30.856 -41.244  1.00 40.50           C  
ATOM    388  CD  GLU A 321      18.426 -30.213 -41.149  1.00 42.36           C  
ATOM    389  N   LEU A 322      13.470 -30.091 -38.221  1.00 36.16           N  
ATOM    390  CA  LEU A 322      12.717 -30.131 -36.955  1.00 37.47           C  
ATOM    391  C   LEU A 322      11.546 -31.100 -37.148  1.00 37.91           C  
ATOM    392  O   LEU A 322      11.116 -31.278 -38.291  1.00 42.19           O  
ATOM    393  CB  LEU A 322      12.242 -28.713 -36.613  1.00 39.94           C  
ATOM    394  CG  LEU A 322      13.333 -27.652 -36.392  1.00 40.70           C  
ATOM    395  CD1 LEU A 322      12.735 -26.340 -35.886  1.00 39.46           C  
ATOM    396  CD2 LEU A 322      14.388 -28.139 -35.417  1.00 43.35           C  
ATOM    397  N   SER A 323      11.021 -31.677 -36.070  1.00 39.14           N  
ATOM    398  CA  SER A 323       9.775 -32.490 -36.092  1.00 39.73           C  
ATOM    399  C   SER A 323       8.615 -31.630 -36.615  1.00 38.04           C  
ATOM    400  O   SER A 323       8.605 -30.380 -36.377  1.00 39.66           O  
ATOM    401  CB  SER A 323       9.469 -33.077 -34.753  1.00 37.13           C  
ATOM    402  OG  SER A 323       8.661 -32.190 -34.006  1.00 42.69           O  
ATOM    403  N   LEU A 324       7.687 -32.263 -37.332  1.00 33.58           N  
ATOM    404  CA  LEU A 324       6.488 -31.602 -37.898  1.00 32.88           C  
ATOM    405  C   LEU A 324       5.728 -30.897 -36.771  1.00 37.40           C  
ATOM    406  O   LEU A 324       5.297 -29.733 -36.970  1.00 36.61           O  
ATOM    407  CB  LEU A 324       5.636 -32.677 -38.564  1.00 32.28           C  
ATOM    408  CG  LEU A 324       4.509 -32.179 -39.452  1.00 33.65           C  
ATOM    409  CD1 LEU A 324       5.037 -31.295 -40.567  1.00 34.47           C  
ATOM    410  CD2 LEU A 324       3.764 -33.369 -40.040  1.00 37.79           C  
ATOM    411  N   PHE A 325       5.615 -31.537 -35.599  1.00 35.39           N  
ATOM    412  CA  PHE A 325       4.957 -30.932 -34.413  1.00 36.38           C  
ATOM    413  C   PHE A 325       5.639 -29.586 -34.102  1.00 36.25           C  
ATOM    414  O   PHE A 325       4.941 -28.572 -33.810  1.00 38.43           O  
ATOM    415  CB  PHE A 325       4.975 -31.899 -33.223  1.00 37.67           C  
ATOM    416  CG  PHE A 325       4.199 -31.415 -32.027  1.00 40.46           C  
ATOM    417  CD1 PHE A 325       2.830 -31.619 -31.940  1.00 42.81           C  
ATOM    418  CD2 PHE A 325       4.830 -30.739 -30.988  1.00 44.82           C  
ATOM    419  CE1 PHE A 325       2.105 -31.155 -30.845  1.00 44.25           C  
ATOM    420  CE2 PHE A 325       4.102 -30.257 -29.905  1.00 45.90           C  
ATOM    421  CZ  PHE A 325       2.740 -30.471 -29.832  1.00 43.73           C  
ATOM    422  N   ASP A 326       6.969 -29.545 -34.143  1.00 34.41           N  
ATOM    423  CA  ASP A 326       7.701 -28.300 -33.800  1.00 38.67           C  
ATOM    424  C   ASP A 326       7.431 -27.250 -34.887  1.00 35.08           C  
ATOM    425  O   ASP A 326       7.108 -26.088 -34.536  1.00 36.60           O  
ATOM    426  CB  ASP A 326       9.190 -28.563 -33.573  1.00 41.95           C  
ATOM    427  CG  ASP A 326       9.527 -29.162 -32.217  1.00 46.05           C  
ATOM    428  OD1 ASP A 326       8.689 -29.079 -31.313  1.00 46.35           O  
ATOM    429  OD2 ASP A 326      10.644 -29.708 -32.081  1.00 48.76           O  
ATOM    430  N   GLN A 327       7.560 -27.653 -36.152  1.00 33.62           N  
ATOM    431  CA  GLN A 327       7.366 -26.792 -37.347  1.00 31.50           C  
ATOM    432  C   GLN A 327       6.006 -26.087 -37.251  1.00 32.88           C  
ATOM    433  O   GLN A 327       5.942 -24.823 -37.429  1.00 31.57           O  
ATOM    434  CB  GLN A 327       7.483 -27.637 -38.614  1.00 31.14           C  
ATOM    435  CG  GLN A 327       8.907 -28.080 -38.903  1.00 33.14           C  
ATOM    436  CD  GLN A 327       9.043 -28.945 -40.126  1.00 33.25           C  
ATOM    437  OE1 GLN A 327       8.407 -28.700 -41.146  1.00 42.02           O  
ATOM    438  NE2 GLN A 327       9.886 -29.962 -40.031  1.00 34.44           N  
ATOM    439  N   VAL A 328       4.969 -26.882 -36.984  1.00 32.48           N  
ATOM    440  CA  VAL A 328       3.555 -26.436 -36.815  1.00 32.69           C  
ATOM    441  C   VAL A 328       3.463 -25.540 -35.578  1.00 31.62           C  
ATOM    442  O   VAL A 328       2.838 -24.495 -35.679  1.00 27.58           O  
ATOM    443  CB  VAL A 328       2.604 -27.652 -36.731  1.00 36.10           C  
ATOM    444  CG1 VAL A 328       1.240 -27.273 -36.175  1.00 34.40           C  
ATOM    445  CG2 VAL A 328       2.454 -28.323 -38.089  1.00 35.58           C  
ATOM    446  N   ARG A 329       4.065 -25.945 -34.458  1.00 33.02           N  
ATOM    447  CA  ARG A 329       3.925 -25.217 -33.171  1.00 34.21           C  
ATOM    448  C   ARG A 329       4.574 -23.833 -33.286  1.00 31.87           C  
ATOM    449  O   ARG A 329       4.000 -22.875 -32.733  1.00 29.83           O  
ATOM    450  CB  ARG A 329       4.478 -26.034 -32.005  1.00 37.16           C  
ATOM    451  CG  ARG A 329       3.491 -27.076 -31.492  1.00 41.59           C  
ATOM    452  N   LEU A 330       5.692 -23.718 -33.998  1.00 30.19           N  
ATOM    453  CA  LEU A 330       6.428 -22.428 -34.134  1.00 29.26           C  
ATOM    454  C   LEU A 330       5.636 -21.473 -35.053  1.00 29.71           C  
ATOM    455  O   LEU A 330       5.463 -20.286 -34.694  1.00 28.28           O  
ATOM    456  CB  LEU A 330       7.813 -22.753 -34.695  1.00 29.82           C  
ATOM    457  CG  LEU A 330       8.763 -23.497 -33.748  1.00 27.81           C  
ATOM    458  CD1 LEU A 330      10.035 -23.878 -34.458  1.00 28.99           C  
ATOM    459  CD2 LEU A 330       9.115 -22.647 -32.555  1.00 28.38           C  
ATOM    460  N   LEU A 331       5.105 -21.982 -36.175  1.00 29.73           N  
ATOM    461  CA  LEU A 331       4.310 -21.183 -37.138  1.00 28.20           C  
ATOM    462  C   LEU A 331       3.013 -20.731 -36.457  1.00 30.11           C  
ATOM    463  O   LEU A 331       2.707 -19.501 -36.465  1.00 29.39           O  
ATOM    464  CB  LEU A 331       4.102 -21.999 -38.415  1.00 29.23           C  
ATOM    465  CG  LEU A 331       5.297 -21.986 -39.371  1.00 30.68           C  
ATOM    466  CD1 LEU A 331       5.169 -23.045 -40.453  1.00 34.25           C  
ATOM    467  CD2 LEU A 331       5.503 -20.620 -40.006  1.00 29.60           C  
ATOM    468  N   GLU A 332       2.339 -21.659 -35.786  1.00 31.04           N  
ATOM    469  CA  GLU A 332       1.075 -21.407 -35.050  1.00 33.90           C  
ATOM    470  C   GLU A 332       1.296 -20.311 -34.009  1.00 32.99           C  
ATOM    471  O   GLU A 332       0.458 -19.397 -33.933  1.00 35.37           O  
ATOM    472  CB  GLU A 332       0.597 -22.697 -34.384  1.00 35.20           C  
ATOM    473  CG  GLU A 332      -0.001 -23.685 -35.370  1.00 36.79           C  
ATOM    474  CD  GLU A 332      -0.790 -24.806 -34.704  1.00 38.58           C  
ATOM    475  OE1 GLU A 332      -0.499 -25.151 -33.538  1.00 40.17           O  
ATOM    476  OE2 GLU A 332      -1.728 -25.286 -35.334  1.00 42.98           O  
ATOM    477  N   SER A 333       2.360 -20.442 -33.208  1.00 31.27           N  
ATOM    478  CA  SER A 333       2.760 -19.457 -32.173  1.00 30.53           C  
ATOM    479  C   SER A 333       3.045 -18.099 -32.800  1.00 29.90           C  
ATOM    480  O   SER A 333       2.416 -17.146 -32.392  1.00 36.52           O  
ATOM    481  CB  SER A 333       3.940 -19.931 -31.422  1.00 32.52           C  
ATOM    482  OG  SER A 333       3.714 -21.271 -31.022  1.00 39.48           O  
ATOM    483  N   SER A 334       3.915 -18.036 -33.800  1.00 28.37           N  
ATOM    484  CA  SER A 334       4.616 -16.783 -34.195  1.00 28.50           C  
ATOM    485  C   SER A 334       3.958 -16.068 -35.378  1.00 25.96           C  
ATOM    486  O   SER A 334       4.375 -14.939 -35.634  1.00 27.20           O  
ATOM    487  CB  SER A 334       6.046 -17.107 -34.501  1.00 31.83           C  
ATOM    488  OG  SER A 334       6.150 -17.926 -35.674  1.00 38.21           O  
ATOM    489  N   TRP A 335       2.984 -16.658 -36.090  1.00 24.43           N  
ATOM    490  CA  TRP A 335       2.591 -16.120 -37.417  1.00 26.01           C  
ATOM    491  C   TRP A 335       2.210 -14.618 -37.356  1.00 26.28           C  
ATOM    492  O   TRP A 335       2.607 -13.853 -38.268  1.00 22.87           O  
ATOM    493  CB  TRP A 335       1.507 -16.958 -38.092  1.00 25.95           C  
ATOM    494  CG  TRP A 335       0.172 -16.983 -37.406  1.00 28.56           C  
ATOM    495  CD1 TRP A 335      -0.244 -17.906 -36.486  1.00 28.88           C  
ATOM    496  CD2 TRP A 335      -0.959 -16.112 -37.636  1.00 30.58           C  
ATOM    497  NE1 TRP A 335      -1.522 -17.627 -36.073  1.00 32.74           N  
ATOM    498  CE2 TRP A 335      -2.012 -16.573 -36.806  1.00 32.84           C  
ATOM    499  CE3 TRP A 335      -1.211 -15.010 -38.469  1.00 30.83           C  
ATOM    500  CZ2 TRP A 335      -3.272 -15.964 -36.781  1.00 31.38           C  
ATOM    501  CZ3 TRP A 335      -2.455 -14.400 -38.427  1.00 31.82           C  
ATOM    502  CH2 TRP A 335      -3.473 -14.872 -37.593  1.00 28.74           C  
ATOM    503  N   MET A 336       1.472 -14.172 -36.342  1.00 27.10           N  
ATOM    504  CA  MET A 336       1.007 -12.762 -36.293  1.00 29.11           C  
ATOM    505  C   MET A 336       2.222 -11.847 -36.012  1.00 30.54           C  
ATOM    506  O   MET A 336       2.309 -10.799 -36.680  1.00 27.72           O  
ATOM    507  CB  MET A 336      -0.091 -12.584 -35.238  1.00 31.34           C  
ATOM    508  CG  MET A 336      -0.542 -11.150 -35.047  1.00 34.61           C  
ATOM    509  SD  MET A 336      -1.643 -10.600 -36.357  1.00 44.47           S  
ATOM    510  CE  MET A 336      -3.187 -11.366 -35.861  1.00 44.46           C  
ATOM    511  N   GLU A 337       3.115 -12.224 -35.073  1.00 29.58           N  
ATOM    512  CA  GLU A 337       4.392 -11.507 -34.798  1.00 29.62           C  
ATOM    513  C   GLU A 337       5.153 -11.374 -36.120  1.00 27.54           C  
ATOM    514  O   GLU A 337       5.520 -10.252 -36.469  1.00 28.35           O  
ATOM    515  CB  GLU A 337       5.244 -12.252 -33.759  1.00 31.25           C  
ATOM    516  CG  GLU A 337       4.836 -12.065 -32.303  1.00 34.40           C  
ATOM    517  CD  GLU A 337       4.108 -13.200 -31.591  1.00 30.81           C  
ATOM    518  N   VAL A 338       5.250 -12.455 -36.902  1.00 26.13           N  
ATOM    519  CA  VAL A 338       6.035 -12.448 -38.177  1.00 27.49           C  
ATOM    520  C   VAL A 338       5.346 -11.592 -39.247  1.00 29.36           C  
ATOM    521  O   VAL A 338       6.093 -10.892 -40.002  1.00 30.15           O  
ATOM    522  CB  VAL A 338       6.318 -13.868 -38.702  1.00 26.75           C  
ATOM    523  CG1 VAL A 338       6.879 -13.835 -40.121  1.00 26.91           C  
ATOM    524  CG2 VAL A 338       7.260 -14.625 -37.777  1.00 26.06           C  
ATOM    525  N   LEU A 339       4.015 -11.606 -39.353  1.00 26.10           N  
ATOM    526  CA  LEU A 339       3.342 -10.625 -40.247  1.00 28.05           C  
ATOM    527  C   LEU A 339       3.687  -9.184 -39.812  1.00 27.80           C  
ATOM    528  O   LEU A 339       4.057  -8.356 -40.670  1.00 27.46           O  
ATOM    529  CB  LEU A 339       1.823 -10.813 -40.247  1.00 29.60           C  
ATOM    530  CG  LEU A 339       1.248 -12.057 -40.935  1.00 31.33           C  
ATOM    531  CD1 LEU A 339      -0.254 -11.902 -41.083  1.00 32.98           C  
ATOM    532  CD2 LEU A 339       1.871 -12.327 -42.290  1.00 31.77           C  
ATOM    533  N   MET A 340       3.530  -8.858 -38.534  1.00 29.58           N  
ATOM    534  CA  MET A 340       3.671  -7.456 -38.053  1.00 29.92           C  
ATOM    535  C   MET A 340       5.112  -6.953 -38.232  1.00 30.75           C  
ATOM    536  O   MET A 340       5.303  -5.750 -38.469  1.00 31.60           O  
ATOM    537  CB  MET A 340       3.239  -7.348 -36.595  1.00 29.80           C  
ATOM    538  CG  MET A 340       1.742  -7.412 -36.473  1.00 33.01           C  
ATOM    539  SD  MET A 340       1.082  -7.272 -34.813  1.00 39.18           S  
ATOM    540  CE  MET A 340      -0.537  -6.652 -35.254  1.00 39.89           C  
ATOM    541  N   MET A 341       6.098  -7.832 -38.121  1.00 30.47           N  
ATOM    542  CA  MET A 341       7.526  -7.496 -38.314  1.00 30.19           C  
ATOM    543  C   MET A 341       7.715  -7.129 -39.781  1.00 29.08           C  
ATOM    544  O   MET A 341       8.370  -6.089 -40.073  1.00 28.59           O  
ATOM    545  CB  MET A 341       8.392  -8.698 -37.920  1.00 33.07           C  
ATOM    546  CG  MET A 341       9.832  -8.342 -37.728  1.00 36.88           C  
ATOM    547  SD  MET A 341      10.165  -7.203 -36.362  1.00 34.98           S  
ATOM    548  CE  MET A 341      11.154  -5.977 -37.233  1.00 34.96           C  
ATOM    549  N   GLY A 342       7.091  -7.909 -40.659  1.00 26.81           N  
ATOM    550  CA  GLY A 342       7.030  -7.667 -42.120  1.00 26.92           C  
ATOM    551  C   GLY A 342       6.431  -6.318 -42.414  1.00 28.19           C  
ATOM    552  O   GLY A 342       7.061  -5.510 -43.126  1.00 27.40           O  
ATOM    553  N   LEU A 343       5.316  -6.022 -41.766  1.00 29.03           N  
ATOM    554  CA  LEU A 343       4.615  -4.732 -41.945  1.00 29.92           C  
ATOM    555  C   LEU A 343       5.550  -3.592 -41.524  1.00 31.46           C  
ATOM    556  O   LEU A 343       5.606  -2.564 -42.239  1.00 29.61           O  
ATOM    557  CB  LEU A 343       3.328  -4.763 -41.114  1.00 29.30           C  
ATOM    558  CG  LEU A 343       2.545  -3.450 -41.068  1.00 32.87           C  
ATOM    559  CD1 LEU A 343       2.000  -3.053 -42.439  1.00 31.60           C  
ATOM    560  CD2 LEU A 343       1.412  -3.547 -40.049  1.00 35.46           C  
ATOM    561  N   MET A 344       6.209  -3.723 -40.366  1.00 35.51           N  
ATOM    562  CA  MET A 344       7.007  -2.619 -39.780  1.00 33.28           C  
ATOM    563  C   MET A 344       8.163  -2.306 -40.731  1.00 33.49           C  
ATOM    564  O   MET A 344       8.359  -1.131 -41.045  1.00 32.67           O  
ATOM    565  CB  MET A 344       7.495  -2.985 -38.388  1.00 37.95           C  
ATOM    566  CG  MET A 344       6.395  -2.830 -37.337  1.00 41.71           C  
ATOM    567  SD  MET A 344       6.946  -3.476 -35.741  1.00 44.97           S  
ATOM    568  CE  MET A 344       5.406  -3.679 -34.855  1.00 44.87           C  
ATOM    569  N   TRP A 345       8.812  -3.332 -41.281  1.00 33.34           N  
ATOM    570  CA  TRP A 345       9.908  -3.167 -42.270  1.00 34.15           C  
ATOM    571  C   TRP A 345       9.393  -2.441 -43.507  1.00 33.03           C  
ATOM    572  O   TRP A 345      10.075  -1.533 -43.993  1.00 37.66           O  
ATOM    573  CB  TRP A 345      10.528  -4.513 -42.647  1.00 33.11           C  
ATOM    574  CG  TRP A 345      11.592  -4.360 -43.687  1.00 37.09           C  
ATOM    575  CD1 TRP A 345      11.567  -4.821 -44.970  1.00 33.57           C  
ATOM    576  CD2 TRP A 345      12.836  -3.640 -43.535  1.00 35.73           C  
ATOM    577  NE1 TRP A 345      12.707  -4.444 -45.616  1.00 35.30           N  
ATOM    578  CE2 TRP A 345      13.514  -3.733 -44.766  1.00 35.81           C  
ATOM    579  CE3 TRP A 345      13.451  -2.955 -42.483  1.00 33.63           C  
ATOM    580  CZ2 TRP A 345      14.793  -3.200 -44.957  1.00 37.40           C  
ATOM    581  CZ3 TRP A 345      14.696  -2.391 -42.684  1.00 36.93           C  
ATOM    582  CH2 TRP A 345      15.358  -2.512 -43.908  1.00 36.83           C  
ATOM    583  N   ARG A 346       8.232  -2.827 -44.025  1.00 33.45           N  
ATOM    584  CA  ARG A 346       7.711  -2.184 -45.253  1.00 31.51           C  
ATOM    585  C   ARG A 346       7.400  -0.726 -44.945  1.00 31.81           C  
ATOM    586  O   ARG A 346       7.440   0.067 -45.869  1.00 37.54           O  
ATOM    587  CB  ARG A 346       6.475  -2.901 -45.793  1.00 28.91           C  
ATOM    588  CG  ARG A 346       6.815  -4.197 -46.499  1.00 28.82           C  
ATOM    589  CD  ARG A 346       5.651  -4.972 -47.074  1.00 29.96           C  
ATOM    590  NE  ARG A 346       4.489  -5.158 -46.213  1.00 27.68           N  
ATOM    591  CZ  ARG A 346       4.187  -6.242 -45.511  1.00 27.09           C  
ATOM    592  NH1 ARG A 346       4.990  -7.280 -45.454  1.00 32.04           N  
ATOM    593  NH2 ARG A 346       3.066  -6.276 -44.833  1.00 26.46           N  
ATOM    594  N   SER A 347       7.088  -0.410 -43.696  1.00 30.79           N  
ATOM    595  CA  SER A 347       6.515   0.898 -43.281  1.00 34.24           C  
ATOM    596  C   SER A 347       7.627   1.864 -42.854  1.00 37.12           C  
ATOM    597  O   SER A 347       7.310   3.054 -42.706  1.00 38.66           O  
ATOM    598  CB  SER A 347       5.505   0.703 -42.157  1.00 32.65           C  
ATOM    599  OG  SER A 347       4.401  -0.104 -42.586  1.00 33.93           O  
ATOM    600  N   ILE A 348       8.862   1.374 -42.676  1.00 34.88           N  
ATOM    601  CA  ILE A 348       9.924   2.057 -41.883  1.00 39.79           C  
ATOM    602  C   ILE A 348      10.206   3.445 -42.474  1.00 42.47           C  
ATOM    603  O   ILE A 348      10.180   4.426 -41.713  1.00 45.73           O  
ATOM    604  CB  ILE A 348      11.161   1.149 -41.799  1.00 42.01           C  
ATOM    605  CG1 ILE A 348      12.105   1.563 -40.677  1.00 42.01           C  
ATOM    606  CG2 ILE A 348      11.896   1.046 -43.122  1.00 46.74           C  
ATOM    607  CD1 ILE A 348      12.976   0.411 -40.212  1.00 43.27           C  
ATOM    608  N   ASP A 349      10.353   3.536 -43.794  1.00 42.45           N  
ATOM    609  CA  ASP A 349      10.634   4.793 -44.541  1.00 47.53           C  
ATOM    610  C   ASP A 349       9.395   5.685 -44.687  1.00 51.01           C  
ATOM    611  O   ASP A 349       9.569   6.815 -45.162  1.00 64.99           O  
ATOM    612  CB  ASP A 349      11.146   4.480 -45.952  1.00 46.36           C  
ATOM    613  CG  ASP A 349      12.544   3.892 -45.956  1.00 47.80           C  
ATOM    614  OD1 ASP A 349      13.203   3.988 -44.908  1.00 49.94           O  
ATOM    615  OD2 ASP A 349      12.969   3.347 -47.005  1.00 52.39           O  
ATOM    616  N   HIS A 350       8.192   5.228 -44.338  1.00 44.89           N  
ATOM    617  CA  HIS A 350       6.930   5.940 -44.677  1.00 45.94           C  
ATOM    618  C   HIS A 350       6.206   6.342 -43.396  1.00 46.74           C  
ATOM    619  O   HIS A 350       5.156   5.785 -43.071  1.00 45.63           O  
ATOM    620  CB  HIS A 350       6.061   5.075 -45.603  1.00 50.22           C  
ATOM    621  CG  HIS A 350       6.756   4.524 -46.808  1.00 52.93           C  
ATOM    622  ND1 HIS A 350       7.739   3.545 -46.727  1.00 62.03           N  
ATOM    623  CD2 HIS A 350       6.591   4.772 -48.122  1.00 55.18           C  
ATOM    624  CE1 HIS A 350       8.150   3.225 -47.941  1.00 61.63           C  
ATOM    625  NE2 HIS A 350       7.459   3.957 -48.814  1.00 61.26           N  
ATOM    626  N   PRO A 351       6.755   7.312 -42.626  1.00 45.30           N  
ATOM    627  CA  PRO A 351       6.265   7.601 -41.281  1.00 43.10           C  
ATOM    628  C   PRO A 351       4.802   8.049 -41.327  1.00 47.11           C  
ATOM    629  O   PRO A 351       4.421   8.669 -42.285  1.00 49.77           O  
ATOM    630  CB  PRO A 351       7.154   8.747 -40.753  1.00 46.64           C  
ATOM    631  CG  PRO A 351       7.850   9.320 -41.991  1.00 46.17           C  
ATOM    632  CD  PRO A 351       7.879   8.194 -43.013  1.00 49.66           C  
ATOM    633  N   GLY A 352       4.032   7.700 -40.301  1.00 47.85           N  
ATOM    634  CA  GLY A 352       2.581   7.935 -40.249  1.00 49.15           C  
ATOM    635  C   GLY A 352       1.800   6.978 -41.138  1.00 55.09           C  
ATOM    636  O   GLY A 352       0.542   7.115 -41.166  1.00 59.26           O  
ATOM    637  N   LYS A 353       2.474   6.032 -41.813  1.00 52.06           N  
ATOM    638  CA  LYS A 353       1.842   5.120 -42.810  1.00 49.57           C  
ATOM    639  C   LYS A 353       2.153   3.653 -42.464  1.00 44.69           C  
ATOM    640  O   LYS A 353       3.269   3.335 -42.027  1.00 38.96           O  
ATOM    641  CB  LYS A 353       2.302   5.474 -44.229  1.00 53.52           C  
ATOM    642  CG  LYS A 353       1.648   6.706 -44.843  1.00 60.00           C  
ATOM    643  CD  LYS A 353       2.316   7.185 -46.137  1.00 67.28           C  
ATOM    644  CE  LYS A 353       1.942   6.373 -47.365  1.00 69.63           C  
ATOM    645  NZ  LYS A 353       2.727   6.747 -48.572  1.00 73.33           N  
ATOM    646  N   LEU A 354       1.169   2.776 -42.627  1.00 43.42           N  
ATOM    647  CA  LEU A 354       1.349   1.308 -42.506  1.00 39.26           C  
ATOM    648  C   LEU A 354       1.163   0.716 -43.910  1.00 38.15           C  
ATOM    649  O   LEU A 354       0.072   0.842 -44.498  1.00 33.95           O  
ATOM    650  CB  LEU A 354       0.377   0.748 -41.463  1.00 35.69           C  
ATOM    651  CG  LEU A 354       0.698   1.093 -40.011  1.00 34.62           C  
ATOM    652  CD1 LEU A 354      -0.451   0.666 -39.089  1.00 33.72           C  
ATOM    653  CD2 LEU A 354       2.019   0.461 -39.562  1.00 31.32           C  
ATOM    654  N   ILE A 355       2.248   0.207 -44.477  1.00 36.11           N  
ATOM    655  CA  ILE A 355       2.281  -0.254 -45.888  1.00 33.99           C  
ATOM    656  C   ILE A 355       1.900  -1.729 -45.823  1.00 32.31           C  
ATOM    657  O   ILE A 355       2.768  -2.628 -46.011  1.00 29.95           O  
ATOM    658  CB  ILE A 355       3.660   0.032 -46.523  1.00 34.40           C  
ATOM    659  CG1 ILE A 355       4.107   1.482 -46.301  1.00 32.82           C  
ATOM    660  CG2 ILE A 355       3.657  -0.329 -47.985  1.00 31.57           C  
ATOM    661  CD1 ILE A 355       3.143   2.516 -46.829  1.00 33.89           C  
ATOM    662  N   PHE A 356       0.648  -1.977 -45.456  1.00 31.05           N  
ATOM    663  CA  PHE A 356       0.126  -3.357 -45.456  1.00 31.77           C  
ATOM    664  C   PHE A 356       0.521  -3.969 -46.812  1.00 30.64           C  
ATOM    665  O   PHE A 356       1.137  -5.049 -46.843  1.00 29.07           O  
ATOM    666  CB  PHE A 356      -1.352  -3.350 -45.062  1.00 32.39           C  
ATOM    667  CG  PHE A 356      -1.596  -3.201 -43.580  1.00 33.29           C  
ATOM    668  CD1 PHE A 356      -1.342  -4.249 -42.707  1.00 32.71           C  
ATOM    669  CD2 PHE A 356      -2.100  -2.015 -43.053  1.00 33.72           C  
ATOM    670  CE1 PHE A 356      -1.587  -4.100 -41.350  1.00 32.80           C  
ATOM    671  CE2 PHE A 356      -2.361  -1.883 -41.698  1.00 31.08           C  
ATOM    672  CZ  PHE A 356      -2.086  -2.921 -40.852  1.00 30.07           C  
ATOM    673  N   ALA A 357       0.196  -3.287 -47.908  1.00 34.15           N  
ATOM    674  CA  ALA A 357       0.557  -3.709 -49.278  1.00 33.35           C  
ATOM    675  C   ALA A 357       0.627  -2.485 -50.177  1.00 32.03           C  
ATOM    676  O   ALA A 357       0.204  -1.396 -49.796  1.00 31.07           O  
ATOM    677  CB  ALA A 357      -0.428  -4.727 -49.791  1.00 31.61           C  
ATOM    678  N   PRO A 358       1.192  -2.649 -51.386  1.00 34.76           N  
ATOM    679  CA  PRO A 358       1.257  -1.567 -52.365  1.00 37.01           C  
ATOM    680  C   PRO A 358      -0.119  -0.994 -52.721  1.00 40.49           C  
ATOM    681  O   PRO A 358      -0.186   0.191 -53.000  1.00 39.43           O  
ATOM    682  CB  PRO A 358       1.886  -2.231 -53.592  1.00 39.41           C  
ATOM    683  CG  PRO A 358       2.673  -3.395 -53.022  1.00 37.97           C  
ATOM    684  CD  PRO A 358       1.853  -3.884 -51.850  1.00 36.20           C  
ATOM    685  N   ASP A 359      -1.160  -1.837 -52.662  1.00 39.24           N  
ATOM    686  CA  ASP A 359      -2.568  -1.455 -52.935  1.00 38.65           C  
ATOM    687  C   ASP A 359      -3.336  -1.467 -51.613  1.00 41.44           C  
ATOM    688  O   ASP A 359      -4.549  -1.670 -51.646  1.00 40.90           O  
ATOM    689  CB  ASP A 359      -3.200  -2.375 -53.985  1.00 37.73           C  
ATOM    690  CG  ASP A 359      -3.268  -3.834 -53.561  1.00 40.54           C  
ATOM    691  OD1 ASP A 359      -2.675  -4.159 -52.504  1.00 40.20           O  
ATOM    692  OD2 ASP A 359      -3.897  -4.642 -54.298  1.00 38.96           O  
ATOM    693  N   LEU A 360      -2.638  -1.336 -50.484  1.00 43.59           N  
ATOM    694  CA  LEU A 360      -3.278  -1.224 -49.153  1.00 38.84           C  
ATOM    695  C   LEU A 360      -2.316  -0.520 -48.207  1.00 40.38           C  
ATOM    696  O   LEU A 360      -1.465  -1.195 -47.581  1.00 40.72           O  
ATOM    697  CB  LEU A 360      -3.677  -2.592 -48.610  1.00 38.90           C  
ATOM    698  CG  LEU A 360      -4.441  -2.522 -47.290  1.00 41.06           C  
ATOM    699  CD1 LEU A 360      -5.747  -1.782 -47.478  1.00 41.21           C  
ATOM    700  CD2 LEU A 360      -4.691  -3.905 -46.719  1.00 45.84           C  
ATOM    701  N   VAL A 361      -2.493   0.790 -48.133  1.00 37.98           N  
ATOM    702  CA  VAL A 361      -1.658   1.762 -47.394  1.00 36.96           C  
ATOM    703  C   VAL A 361      -2.598   2.554 -46.508  1.00 38.54           C  
ATOM    704  O   VAL A 361      -3.360   3.354 -47.076  1.00 45.60           O  
ATOM    705  CB  VAL A 361      -0.944   2.707 -48.374  1.00 39.88           C  
ATOM    706  CG1 VAL A 361      -0.211   3.811 -47.616  1.00 43.69           C  
ATOM    707  CG2 VAL A 361      -0.010   1.970 -49.317  1.00 35.69           C  
ATOM    708  N   LEU A 362      -2.565   2.331 -45.200  1.00 38.25           N  
ATOM    709  CA  LEU A 362      -3.499   2.959 -44.229  1.00 41.13           C  
ATOM    710  C   LEU A 362      -2.738   3.899 -43.287  1.00 49.42           C  
ATOM    711  O   LEU A 362      -1.536   3.627 -43.009  1.00 42.40           O  
ATOM    712  CB  LEU A 362      -4.187   1.853 -43.427  1.00 42.12           C  
ATOM    713  CG  LEU A 362      -4.905   0.801 -44.268  1.00 43.00           C  
ATOM    714  CD1 LEU A 362      -5.486  -0.286 -43.378  1.00 44.43           C  
ATOM    715  CD2 LEU A 362      -5.996   1.441 -45.122  1.00 44.64           C  
ATOM    716  N   ASP A 363      -3.425   4.934 -42.778  1.00 53.87           N  
ATOM    717  CA  ASP A 363      -2.933   5.788 -41.659  1.00 55.82           C  
ATOM    718  C   ASP A 363      -3.847   5.584 -40.436  1.00 54.14           C  
ATOM    719  O   ASP A 363      -4.878   4.876 -40.579  1.00 53.11           O  
ATOM    720  CB  ASP A 363      -2.719   7.238 -42.123  1.00 58.57           C  
ATOM    721  CG  ASP A 363      -3.979   8.042 -42.374  1.00 57.64           C  
ATOM    722  OD1 ASP A 363      -5.007   7.720 -41.754  1.00 60.70           O  
ATOM    723  OD2 ASP A 363      -3.909   9.004 -43.165  1.00 67.38           O  
ATOM    724  N   ARG A 364      -3.425   6.114 -39.273  1.00 60.34           N  
ATOM    725  CA  ARG A 364      -4.094   6.029 -37.937  1.00 60.86           C  
ATOM    726  C   ARG A 364      -5.560   6.461 -38.057  1.00 61.04           C  
ATOM    727  O   ARG A 364      -6.421   5.841 -37.382  1.00 58.93           O  
ATOM    728  CB  ARG A 364      -3.396   6.932 -36.910  1.00 57.52           C  
ATOM    729  N   ASP A 365      -5.822   7.505 -38.853  1.00 57.69           N  
ATOM    730  CA  ASP A 365      -7.179   8.063 -39.079  1.00 58.27           C  
ATOM    731  C   ASP A 365      -8.082   6.902 -39.498  1.00 58.31           C  
ATOM    732  O   ASP A 365      -9.051   6.638 -38.783  1.00 66.26           O  
ATOM    733  N   GLU A 366      -7.717   6.207 -40.580  1.00 62.54           N  
ATOM    734  CA  GLU A 366      -8.503   5.118 -41.231  1.00 57.58           C  
ATOM    735  C   GLU A 366      -8.713   3.936 -40.283  1.00 53.39           C  
ATOM    736  O   GLU A 366      -9.692   3.208 -40.489  1.00 62.05           O  
ATOM    737  CB  GLU A 366      -7.803   4.660 -42.504  1.00 61.76           C  
ATOM    738  CG  GLU A 366      -8.052   5.595 -43.669  1.00 63.70           C  
ATOM    739  CD  GLU A 366      -6.854   5.794 -44.575  1.00 74.01           C  
ATOM    740  OE1 GLU A 366      -6.890   6.723 -45.412  1.00 85.48           O  
ATOM    741  OE2 GLU A 366      -5.882   5.028 -44.436  1.00 83.35           O  
ATOM    742  N   GLY A 367      -7.824   3.747 -39.305  1.00 49.48           N  
ATOM    743  CA  GLY A 367      -7.996   2.803 -38.186  1.00 47.19           C  
ATOM    744  C   GLY A 367      -9.176   3.157 -37.292  1.00 50.10           C  
ATOM    745  O   GLY A 367      -9.775   2.220 -36.711  1.00 49.44           O  
ATOM    746  N   LYS A 368      -9.505   4.453 -37.181  1.00 49.91           N  
ATOM    747  CA  LYS A 368     -10.605   4.988 -36.327  1.00 51.91           C  
ATOM    748  C   LYS A 368     -11.934   4.323 -36.711  1.00 53.26           C  
ATOM    749  O   LYS A 368     -12.763   4.175 -35.805  1.00 52.61           O  
ATOM    750  CB  LYS A 368     -10.764   6.509 -36.457  1.00 48.78           C  
ATOM    751  N   SER A 369     -12.119   3.944 -37.988  1.00 50.82           N  
ATOM    752  CA  SER A 369     -13.404   3.451 -38.552  1.00 51.67           C  
ATOM    753  C   SER A 369     -13.802   2.099 -37.930  1.00 52.88           C  
ATOM    754  O   SER A 369     -15.012   1.861 -37.840  1.00 54.52           O  
ATOM    755  CB  SER A 369     -13.389   3.415 -40.075  1.00 53.99           C  
ATOM    756  OG  SER A 369     -12.499   2.435 -40.594  1.00 56.57           O  
ATOM    757  N   VAL A 370     -12.849   1.265 -37.482  1.00 51.31           N  
ATOM    758  CA  VAL A 370     -13.144  -0.035 -36.804  1.00 48.11           C  
ATOM    759  C   VAL A 370     -12.647   0.030 -35.361  1.00 48.18           C  
ATOM    760  O   VAL A 370     -11.455   0.318 -35.164  1.00 51.12           O  
ATOM    761  CB  VAL A 370     -12.528  -1.242 -37.532  1.00 47.63           C  
ATOM    762  CG1 VAL A 370     -12.840  -2.557 -36.826  1.00 42.07           C  
ATOM    763  CG2 VAL A 370     -12.974  -1.287 -38.976  1.00 48.04           C  
ATOM    764  N   GLU A 371     -13.538  -0.262 -34.407  1.00 44.21           N  
ATOM    765  CA  GLU A 371     -13.225  -0.272 -32.961  1.00 48.31           C  
ATOM    766  C   GLU A 371     -12.046  -1.218 -32.703  1.00 44.74           C  
ATOM    767  O   GLU A 371     -12.056  -2.336 -33.235  1.00 44.66           O  
ATOM    768  CB  GLU A 371     -14.440  -0.694 -32.133  1.00 49.46           C  
ATOM    769  CG  GLU A 371     -14.113  -0.763 -30.651  1.00 51.78           C  
ATOM    770  CD  GLU A 371     -15.304  -0.764 -29.713  1.00 59.97           C  
ATOM    771  OE1 GLU A 371     -15.877  -1.853 -29.507  1.00 50.90           O  
ATOM    772  OE2 GLU A 371     -15.650   0.333 -29.188  1.00 69.37           O  
ATOM    773  N   GLY A 372     -11.081  -0.784 -31.892  1.00 43.32           N  
ATOM    774  CA  GLY A 372      -9.935  -1.604 -31.458  1.00 44.98           C  
ATOM    775  C   GLY A 372      -8.757  -1.530 -32.425  1.00 40.99           C  
ATOM    776  O   GLY A 372      -7.680  -2.007 -32.074  1.00 46.23           O  
ATOM    777  N   ILE A 373      -8.933  -0.952 -33.604  1.00 41.48           N  
ATOM    778  CA  ILE A 373      -7.894  -0.988 -34.674  1.00 46.92           C  
ATOM    779  C   ILE A 373      -6.931   0.200 -34.513  1.00 46.20           C  
ATOM    780  O   ILE A 373      -5.735   0.000 -34.753  1.00 55.21           O  
ATOM    781  CB  ILE A 373      -8.564  -1.087 -36.060  1.00 46.15           C  
ATOM    782  CG1 ILE A 373      -9.143  -2.489 -36.284  1.00 47.22           C  
ATOM    783  CG2 ILE A 373      -7.601  -0.702 -37.173  1.00 48.26           C  
ATOM    784  CD1 ILE A 373      -8.126  -3.625 -36.131  1.00 46.51           C  
ATOM    785  N   LEU A 374      -7.415   1.377 -34.113  1.00 46.22           N  
ATOM    786  CA  LEU A 374      -6.578   2.589 -33.906  1.00 45.93           C  
ATOM    787  C   LEU A 374      -5.515   2.273 -32.832  1.00 48.51           C  
ATOM    788  O   LEU A 374      -4.353   2.660 -32.988  1.00 53.00           O  
ATOM    789  CB  LEU A 374      -7.470   3.777 -33.513  1.00 38.81           C  
ATOM    790  CG  LEU A 374      -6.826   5.153 -33.684  1.00 40.80           C  
ATOM    791  N   GLU A 375      -5.904   1.588 -31.768  1.00 44.02           N  
ATOM    792  CA  GLU A 375      -4.990   1.144 -30.693  1.00 46.87           C  
ATOM    793  C   GLU A 375      -3.860   0.333 -31.346  1.00 51.39           C  
ATOM    794  O   GLU A 375      -2.675   0.497 -30.952  1.00 50.76           O  
ATOM    795  CB  GLU A 375      -5.799   0.349 -29.666  1.00 49.30           C  
ATOM    796  CG  GLU A 375      -4.977  -0.393 -28.633  1.00 56.69           C  
ATOM    797  CD  GLU A 375      -5.820  -1.247 -27.705  1.00 65.92           C  
ATOM    798  OE1 GLU A 375      -6.900  -0.771 -27.265  1.00 77.65           O  
ATOM    799  OE2 GLU A 375      -5.413  -2.389 -27.441  1.00 68.90           O  
ATOM    800  N   ILE A 376      -4.206  -0.513 -32.317  1.00 41.46           N  
ATOM    801  CA  ILE A 376      -3.249  -1.504 -32.869  1.00 41.32           C  
ATOM    802  C   ILE A 376      -2.356  -0.789 -33.878  1.00 36.57           C  
ATOM    803  O   ILE A 376      -1.166  -1.068 -33.883  1.00 33.99           O  
ATOM    804  CB  ILE A 376      -4.001  -2.712 -33.443  1.00 41.07           C  
ATOM    805  CG1 ILE A 376      -4.535  -3.586 -32.303  1.00 39.38           C  
ATOM    806  CG2 ILE A 376      -3.118  -3.486 -34.410  1.00 40.40           C  
ATOM    807  CD1 ILE A 376      -5.526  -4.624 -32.758  1.00 41.05           C  
ATOM    808  N   PHE A 377      -2.924   0.109 -34.672  1.00 35.52           N  
ATOM    809  CA  PHE A 377      -2.184   0.951 -35.636  1.00 40.48           C  
ATOM    810  C   PHE A 377      -1.202   1.882 -34.892  1.00 44.09           C  
ATOM    811  O   PHE A 377      -0.142   2.213 -35.465  1.00 45.47           O  
ATOM    812  CB  PHE A 377      -3.163   1.710 -36.537  1.00 34.89           C  
ATOM    813  CG  PHE A 377      -3.799   0.892 -37.632  1.00 33.40           C  
ATOM    814  CD1 PHE A 377      -3.701  -0.488 -37.664  1.00 32.68           C  
ATOM    815  CD2 PHE A 377      -4.527   1.515 -38.632  1.00 33.54           C  
ATOM    816  CE1 PHE A 377      -4.283  -1.226 -38.687  1.00 30.07           C  
ATOM    817  CE2 PHE A 377      -5.121   0.780 -39.646  1.00 34.55           C  
ATOM    818  CZ  PHE A 377      -4.992  -0.595 -39.670  1.00 33.98           C  
ATOM    819  N   ASP A 378      -1.505   2.281 -33.656  1.00 46.53           N  
ATOM    820  CA  ASP A 378      -0.658   3.223 -32.866  1.00 46.62           C  
ATOM    821  C   ASP A 378       0.582   2.472 -32.353  1.00 42.20           C  
ATOM    822  O   ASP A 378       1.691   2.969 -32.514  1.00 42.99           O  
ATOM    823  CB  ASP A 378      -1.487   3.904 -31.772  1.00 45.86           C  
ATOM    824  CG  ASP A 378      -2.340   5.060 -32.284  1.00 47.15           C  
ATOM    825  OD1 ASP A 378      -2.220   5.424 -33.481  1.00 42.40           O  
ATOM    826  OD2 ASP A 378      -3.116   5.607 -31.476  1.00 54.41           O  
ATOM    827  N   MET A 379       0.392   1.287 -31.793  1.00 42.61           N  
ATOM    828  CA  MET A 379       1.486   0.354 -31.417  1.00 49.06           C  
ATOM    829  C   MET A 379       2.415   0.087 -32.619  1.00 44.24           C  
ATOM    830  O   MET A 379       3.628   0.319 -32.505  1.00 47.68           O  
ATOM    831  CB  MET A 379       0.885  -0.963 -30.937  1.00 46.88           C  
ATOM    832  CG  MET A 379       0.180  -0.827 -29.625  1.00 48.74           C  
ATOM    833  SD  MET A 379      -0.362  -2.430 -29.065  1.00 56.93           S  
ATOM    834  N   LEU A 380       1.852  -0.352 -33.739  1.00 37.69           N  
ATOM    835  CA  LEU A 380       2.616  -0.735 -34.953  1.00 38.27           C  
ATOM    836  C   LEU A 380       3.446   0.463 -35.436  1.00 36.95           C  
ATOM    837  O   LEU A 380       4.639   0.263 -35.770  1.00 34.49           O  
ATOM    838  CB  LEU A 380       1.622  -1.193 -36.023  1.00 36.98           C  
ATOM    839  CG  LEU A 380       0.924  -2.519 -35.721  1.00 37.41           C  
ATOM    840  CD1 LEU A 380      -0.170  -2.790 -36.758  1.00 37.46           C  
ATOM    841  CD2 LEU A 380       1.940  -3.655 -35.651  1.00 36.54           C  
ATOM    842  N   LEU A 381       2.805   1.635 -35.503  1.00 34.12           N  
ATOM    843  CA  LEU A 381       3.396   2.923 -35.961  1.00 38.78           C  
ATOM    844  C   LEU A 381       4.455   3.420 -34.969  1.00 35.82           C  
ATOM    845  O   LEU A 381       5.486   3.901 -35.436  1.00 46.60           O  
ATOM    846  CB  LEU A 381       2.285   3.962 -36.154  1.00 38.78           C  
ATOM    847  CG  LEU A 381       1.603   3.937 -37.519  1.00 40.56           C  
ATOM    848  CD1 LEU A 381       0.358   4.807 -37.526  1.00 43.64           C  
ATOM    849  CD2 LEU A 381       2.560   4.391 -38.617  1.00 43.18           C  
ATOM    850  N   ALA A 382       4.201   3.309 -33.667  1.00 39.80           N  
ATOM    851  CA  ALA A 382       5.127   3.678 -32.569  1.00 39.96           C  
ATOM    852  C   ALA A 382       6.365   2.786 -32.609  1.00 34.65           C  
ATOM    853  O   ALA A 382       7.465   3.352 -32.675  1.00 39.38           O  
ATOM    854  CB  ALA A 382       4.427   3.573 -31.237  1.00 41.39           C  
ATOM    855  N   THR A 383       6.180   1.460 -32.586  1.00 34.98           N  
ATOM    856  CA  THR A 383       7.268   0.461 -32.759  1.00 34.04           C  
ATOM    857  C   THR A 383       8.000   0.720 -34.083  1.00 38.23           C  
ATOM    858  O   THR A 383       9.241   0.578 -34.103  1.00 38.35           O  
ATOM    859  CB  THR A 383       6.773  -0.982 -32.705  1.00 33.32           C  
ATOM    860  OG1 THR A 383       6.099  -1.115 -31.461  1.00 38.34           O  
ATOM    861  CG2 THR A 383       7.888  -2.006 -32.751  1.00 33.92           C  
ATOM    862  N   THR A 384       7.280   1.066 -35.154  1.00 36.07           N  
ATOM    863  CA  THR A 384       7.891   1.262 -36.487  1.00 36.57           C  
ATOM    864  C   THR A 384       8.910   2.403 -36.365  1.00 37.79           C  
ATOM    865  O   THR A 384      10.047   2.226 -36.865  1.00 34.98           O  
ATOM    866  CB  THR A 384       6.837   1.442 -37.583  1.00 34.27           C  
ATOM    867  OG1 THR A 384       6.034   0.259 -37.686  1.00 35.76           O  
ATOM    868  CG2 THR A 384       7.479   1.679 -38.929  1.00 35.03           C  
ATOM    869  N   SER A 385       8.544   3.471 -35.645  1.00 38.86           N  
ATOM    870  CA  SER A 385       9.354   4.707 -35.445  1.00 40.32           C  
ATOM    871  C   SER A 385      10.580   4.455 -34.553  1.00 36.72           C  
ATOM    872  O   SER A 385      11.615   5.044 -34.826  1.00 39.42           O  
ATOM    873  CB  SER A 385       8.499   5.804 -34.902  1.00 38.51           C  
ATOM    874  OG  SER A 385       7.451   6.041 -35.815  1.00 42.90           O  
ATOM    875  N   ARG A 386      10.479   3.618 -33.527  1.00 37.41           N  
ATOM    876  CA  ARG A 386      11.671   3.188 -32.750  1.00 42.06           C  
ATOM    877  C   ARG A 386      12.653   2.440 -33.678  1.00 41.43           C  
ATOM    878  O   ARG A 386      13.885   2.676 -33.565  1.00 38.73           O  
ATOM    879  CB  ARG A 386      11.274   2.367 -31.521  1.00 46.23           C  
ATOM    880  CG  ARG A 386      11.930   2.863 -30.237  1.00 52.41           C  
ATOM    881  N   PHE A 387      12.164   1.581 -34.578  1.00 34.71           N  
ATOM    882  CA  PHE A 387      13.048   0.818 -35.491  1.00 33.32           C  
ATOM    883  C   PHE A 387      13.701   1.830 -36.443  1.00 36.99           C  
ATOM    884  O   PHE A 387      14.898   1.637 -36.790  1.00 31.94           O  
ATOM    885  CB  PHE A 387      12.272  -0.284 -36.209  1.00 33.01           C  
ATOM    886  CG  PHE A 387      12.082  -1.554 -35.416  1.00 31.99           C  
ATOM    887  CD1 PHE A 387      13.173  -2.280 -34.956  1.00 36.17           C  
ATOM    888  CD2 PHE A 387      10.820  -2.069 -35.177  1.00 31.69           C  
ATOM    889  CE1 PHE A 387      12.992  -3.478 -34.267  1.00 37.01           C  
ATOM    890  CE2 PHE A 387      10.644  -3.249 -34.462  1.00 30.08           C  
ATOM    891  CZ  PHE A 387      11.726  -3.952 -34.008  1.00 30.52           C  
ATOM    892  N   ARG A 388      12.946   2.884 -36.809  1.00 38.43           N  
ATOM    893  CA  ARG A 388      13.364   3.940 -37.766  1.00 39.20           C  
ATOM    894  C   ARG A 388      14.438   4.808 -37.101  1.00 37.82           C  
ATOM    895  O   ARG A 388      15.484   5.046 -37.735  1.00 34.23           O  
ATOM    896  CB  ARG A 388      12.186   4.813 -38.209  1.00 40.65           C  
ATOM    897  CG  ARG A 388      12.613   5.970 -39.108  1.00 43.02           C  
ATOM    898  CD  ARG A 388      11.539   7.013 -39.332  1.00 47.49           C  
ATOM    899  NE  ARG A 388      10.354   6.313 -39.779  1.00 53.59           N  
ATOM    900  CZ  ARG A 388       9.199   6.225 -39.133  1.00 50.58           C  
ATOM    901  NH1 ARG A 388       8.982   6.877 -38.004  1.00 51.90           N  
ATOM    902  NH2 ARG A 388       8.229   5.509 -39.670  1.00 55.32           N  
ATOM    903  N   GLU A 389      14.181   5.256 -35.874  1.00 41.19           N  
ATOM    904  CA  GLU A 389      15.152   6.009 -35.040  1.00 45.76           C  
ATOM    905  C   GLU A 389      16.446   5.182 -34.893  1.00 47.40           C  
ATOM    906  O   GLU A 389      17.513   5.767 -35.034  1.00 44.94           O  
ATOM    907  CB  GLU A 389      14.532   6.361 -33.689  1.00 52.59           C  
ATOM    908  CG  GLU A 389      13.419   7.401 -33.768  1.00 63.25           C  
ATOM    909  CD  GLU A 389      12.522   7.543 -32.533  1.00 68.35           C  
ATOM    910  OE1 GLU A 389      12.353   6.550 -31.767  1.00 61.45           O  
ATOM    911  OE2 GLU A 389      11.981   8.656 -32.338  1.00 66.88           O  
ATOM    912  N   LEU A 390      16.357   3.862 -34.672  1.00 42.56           N  
ATOM    913  CA  LEU A 390      17.519   2.950 -34.513  1.00 34.73           C  
ATOM    914  C   LEU A 390      18.155   2.628 -35.862  1.00 32.87           C  
ATOM    915  O   LEU A 390      19.158   1.914 -35.832  1.00 28.99           O  
ATOM    916  CB  LEU A 390      17.076   1.646 -33.844  1.00 39.18           C  
ATOM    917  CG  LEU A 390      16.812   1.674 -32.341  1.00 40.71           C  
ATOM    918  CD1 LEU A 390      16.434   0.275 -31.867  1.00 40.00           C  
ATOM    919  CD2 LEU A 390      18.029   2.184 -31.565  1.00 41.94           C  
ATOM    920  N   LYS A 391      17.567   3.075 -36.988  1.00 35.41           N  
ATOM    921  CA  LYS A 391      18.010   2.763 -38.377  1.00 32.38           C  
ATOM    922  C   LYS A 391      18.221   1.253 -38.560  1.00 34.07           C  
ATOM    923  O   LYS A 391      19.240   0.842 -39.124  1.00 34.41           O  
ATOM    924  CB  LYS A 391      19.310   3.487 -38.725  1.00 37.90           C  
ATOM    925  CG  LYS A 391      19.197   4.994 -38.834  1.00 41.59           C  
ATOM    926  CD  LYS A 391      20.240   5.575 -39.783  1.00 53.16           C  
ATOM    927  CE  LYS A 391      21.085   6.661 -39.144  1.00 58.74           C  
ATOM    928  NZ  LYS A 391      20.252   7.656 -38.418  1.00 58.61           N  
ATOM    929  N   LEU A 392      17.261   0.443 -38.139  1.00 33.31           N  
ATOM    930  CA  LEU A 392      17.207  -0.992 -38.493  1.00 31.56           C  
ATOM    931  C   LEU A 392      17.686  -1.179 -39.940  1.00 31.50           C  
ATOM    932  O   LEU A 392      17.115  -0.583 -40.825  1.00 33.79           O  
ATOM    933  CB  LEU A 392      15.770  -1.496 -38.301  1.00 28.63           C  
ATOM    934  CG  LEU A 392      15.580  -2.973 -38.615  1.00 28.09           C  
ATOM    935  CD1 LEU A 392      16.385  -3.821 -37.648  1.00 27.15           C  
ATOM    936  CD2 LEU A 392      14.104  -3.367 -38.613  1.00 27.74           C  
ATOM    937  N   GLN A 393      18.682  -2.042 -40.137  1.00 34.98           N  
ATOM    938  CA  GLN A 393      19.219  -2.470 -41.445  1.00 33.00           C  
ATOM    939  C   GLN A 393      18.537  -3.761 -41.879  1.00 33.96           C  
ATOM    940  O   GLN A 393      18.234  -4.608 -41.024  1.00 35.88           O  
ATOM    941  CB  GLN A 393      20.705  -2.773 -41.351  1.00 34.85           C  
ATOM    942  CG  GLN A 393      21.521  -1.637 -40.772  1.00 38.34           C  
ATOM    943  CD  GLN A 393      21.468  -0.461 -41.710  1.00 40.91           C  
ATOM    944  OE1 GLN A 393      22.120  -0.460 -42.756  1.00 44.92           O  
ATOM    945  NE2 GLN A 393      20.650   0.519 -41.358  1.00 38.75           N  
ATOM    946  N   HIS A 394      18.374  -3.891 -43.188  1.00 33.38           N  
ATOM    947  CA  HIS A 394      17.697  -5.008 -43.871  1.00 34.99           C  
ATOM    948  C   HIS A 394      18.238  -6.304 -43.281  1.00 32.89           C  
ATOM    949  O   HIS A 394      17.422  -7.154 -42.896  1.00 32.14           O  
ATOM    950  CB  HIS A 394      17.896  -4.871 -45.384  1.00 38.77           C  
ATOM    951  CG  HIS A 394      17.200  -5.917 -46.193  1.00 39.79           C  
ATOM    952  ND1 HIS A 394      15.867  -6.253 -45.995  1.00 35.68           N  
ATOM    953  CD2 HIS A 394      17.638  -6.670 -47.222  1.00 41.97           C  
ATOM    954  CE1 HIS A 394      15.528  -7.189 -46.847  1.00 36.27           C  
ATOM    955  NE2 HIS A 394      16.602  -7.476 -47.601  1.00 39.03           N  
ATOM    956  N   LYS A 395      19.562  -6.435 -43.181  1.00 33.58           N  
ATOM    957  CA  LYS A 395      20.179  -7.719 -42.747  1.00 35.95           C  
ATOM    958  C   LYS A 395      19.858  -7.933 -41.260  1.00 31.95           C  
ATOM    959  O   LYS A 395      19.644  -9.100 -40.898  1.00 30.73           O  
ATOM    960  CB  LYS A 395      21.665  -7.807 -43.124  1.00 38.37           C  
ATOM    961  CG  LYS A 395      21.932  -7.973 -44.617  1.00 39.89           C  
ATOM    962  CD  LYS A 395      23.302  -8.522 -44.941  1.00 43.80           C  
ATOM    963  CE  LYS A 395      23.905  -7.886 -46.179  1.00 50.99           C  
ATOM    964  NZ  LYS A 395      25.380  -8.086 -46.255  1.00 51.26           N  
ATOM    965  N   GLU A 396      19.742  -6.867 -40.455  1.00 31.13           N  
ATOM    966  CA  GLU A 396      19.219  -6.944 -39.049  1.00 32.25           C  
ATOM    967  C   GLU A 396      17.767  -7.454 -39.050  1.00 28.18           C  
ATOM    968  O   GLU A 396      17.460  -8.385 -38.292  1.00 24.87           O  
ATOM    969  CB  GLU A 396      19.282  -5.603 -38.335  1.00 28.63           C  
ATOM    970  CG  GLU A 396      20.695  -5.123 -38.226  1.00 30.59           C  
ATOM    971  CD  GLU A 396      20.909  -3.807 -37.531  1.00 29.43           C  
ATOM    972  OE1 GLU A 396      20.099  -2.866 -37.746  1.00 32.07           O  
ATOM    973  OE2 GLU A 396      21.872  -3.749 -36.748  1.00 26.00           O  
ATOM    974  N   TYR A 397      16.937  -6.907 -39.927  1.00 28.78           N  
ATOM    975  CA  TYR A 397      15.502  -7.258 -40.008  1.00 28.37           C  
ATOM    976  C   TYR A 397      15.426  -8.770 -40.264  1.00 27.32           C  
ATOM    977  O   TYR A 397      14.715  -9.491 -39.537  1.00 27.69           O  
ATOM    978  CB  TYR A 397      14.803  -6.358 -41.034  1.00 30.22           C  
ATOM    979  CG  TYR A 397      13.599  -6.993 -41.679  1.00 29.27           C  
ATOM    980  CD1 TYR A 397      12.397  -7.084 -41.009  1.00 28.18           C  
ATOM    981  CD2 TYR A 397      13.689  -7.545 -42.947  1.00 31.13           C  
ATOM    982  CE1 TYR A 397      11.299  -7.708 -41.582  1.00 31.81           C  
ATOM    983  CE2 TYR A 397      12.609  -8.172 -43.536  1.00 32.12           C  
ATOM    984  CZ  TYR A 397      11.411  -8.255 -42.847  1.00 33.18           C  
ATOM    985  OH  TYR A 397      10.334  -8.832 -43.443  1.00 38.39           O  
ATOM    986  N   LEU A 398      16.179  -9.247 -41.247  1.00 25.83           N  
ATOM    987  CA  LEU A 398      16.144 -10.660 -41.678  1.00 27.86           C  
ATOM    988  C   LEU A 398      16.411 -11.566 -40.486  1.00 25.77           C  
ATOM    989  O   LEU A 398      15.701 -12.598 -40.359  1.00 29.92           O  
ATOM    990  CB  LEU A 398      17.209 -10.874 -42.756  1.00 29.68           C  
ATOM    991  CG  LEU A 398      16.879 -10.259 -44.106  1.00 28.14           C  
ATOM    992  CD1 LEU A 398      18.065 -10.412 -45.064  1.00 26.59           C  
ATOM    993  CD2 LEU A 398      15.594 -10.877 -44.671  1.00 27.48           C  
ATOM    994  N   CYS A 399      17.393 -11.218 -39.653  1.00 25.52           N  
ATOM    995  CA  CYS A 399      17.780 -12.076 -38.502  1.00 26.20           C  
ATOM    996  C   CYS A 399      16.667 -12.056 -37.462  1.00 25.70           C  
ATOM    997  O   CYS A 399      16.208 -13.142 -37.100  1.00 29.14           O  
ATOM    998  CB  CYS A 399      19.118 -11.694 -37.892  1.00 29.90           C  
ATOM    999  SG  CYS A 399      20.527 -11.881 -39.025  1.00 30.78           S  
ATOM   1000  N   VAL A 400      16.205 -10.878 -37.044  1.00 26.03           N  
ATOM   1001  CA  VAL A 400      15.222 -10.745 -35.939  1.00 24.72           C  
ATOM   1002  C   VAL A 400      13.927 -11.459 -36.320  1.00 28.06           C  
ATOM   1003  O   VAL A 400      13.293 -12.007 -35.415  1.00 27.06           O  
ATOM   1004  CB  VAL A 400      14.951  -9.281 -35.598  1.00 26.89           C  
ATOM   1005  CG1 VAL A 400      16.183  -8.588 -35.044  1.00 29.95           C  
ATOM   1006  CG2 VAL A 400      14.414  -8.523 -36.778  1.00 28.42           C  
ATOM   1007  N   LYS A 401      13.524 -11.393 -37.598  1.00 28.67           N  
ATOM   1008  CA  LYS A 401      12.234 -11.952 -38.078  1.00 28.26           C  
ATOM   1009  C   LYS A 401      12.310 -13.461 -37.899  1.00 26.20           C  
ATOM   1010  O   LYS A 401      11.362 -14.019 -37.319  1.00 23.23           O  
ATOM   1011  CB  LYS A 401      11.916 -11.539 -39.522  1.00 29.62           C  
ATOM   1012  CG  LYS A 401      10.581 -12.093 -40.019  1.00 33.29           C  
ATOM   1013  CD  LYS A 401      10.150 -11.660 -41.400  1.00 32.55           C  
ATOM   1014  CE  LYS A 401      11.145 -12.033 -42.464  1.00 33.21           C  
ATOM   1015  NZ  LYS A 401      10.525 -11.846 -43.792  1.00 40.12           N  
ATOM   1016  N   ALA A 402      13.439 -14.058 -38.297  1.00 25.67           N  
ATOM   1017  CA  ALA A 402      13.739 -15.496 -38.124  1.00 27.49           C  
ATOM   1018  C   ALA A 402      13.685 -15.838 -36.638  1.00 30.64           C  
ATOM   1019  O   ALA A 402      13.085 -16.901 -36.312  1.00 30.79           O  
ATOM   1020  CB  ALA A 402      15.082 -15.867 -38.701  1.00 28.41           C  
ATOM   1021  N   MET A 403      14.285 -14.982 -35.796  1.00 27.50           N  
ATOM   1022  CA  MET A 403      14.376 -15.187 -34.329  1.00 31.85           C  
ATOM   1023  C   MET A 403      12.957 -15.164 -33.704  1.00 30.62           C  
ATOM   1024  O   MET A 403      12.687 -15.955 -32.765  1.00 29.56           O  
ATOM   1025  CB  MET A 403      15.285 -14.119 -33.699  1.00 33.07           C  
ATOM   1026  CG  MET A 403      16.723 -14.226 -34.217  1.00 43.45           C  
ATOM   1027  SD  MET A 403      17.914 -12.924 -33.733  1.00 41.84           S  
ATOM   1028  CE  MET A 403      17.759 -13.071 -31.957  1.00 40.42           C  
ATOM   1029  N   ILE A 404      12.086 -14.271 -34.176  1.00 29.81           N  
ATOM   1030  CA  ILE A 404      10.669 -14.209 -33.749  1.00 30.72           C  
ATOM   1031  C   ILE A 404      10.090 -15.611 -33.963  1.00 32.90           C  
ATOM   1032  O   ILE A 404       9.428 -16.120 -33.053  1.00 32.99           O  
ATOM   1033  CB  ILE A 404       9.879 -13.111 -34.498  1.00 32.66           C  
ATOM   1034  CG1 ILE A 404      10.294 -11.701 -34.061  1.00 32.91           C  
ATOM   1035  N   LEU A 405      10.337 -16.228 -35.120  1.00 34.92           N  
ATOM   1036  CA  LEU A 405       9.779 -17.574 -35.432  1.00 35.86           C  
ATOM   1037  C   LEU A 405      10.380 -18.572 -34.442  1.00 31.57           C  
ATOM   1038  O   LEU A 405       9.644 -19.179 -33.679  1.00 33.45           O  
ATOM   1039  CB  LEU A 405      10.067 -17.973 -36.887  1.00 37.35           C  
ATOM   1040  CG  LEU A 405       9.816 -19.443 -37.241  1.00 36.69           C  
ATOM   1041  CD1 LEU A 405       8.336 -19.782 -37.174  1.00 36.19           C  
ATOM   1042  CD2 LEU A 405      10.368 -19.777 -38.615  1.00 34.40           C  
ATOM   1043  N   LEU A 406      11.696 -18.662 -34.415  1.00 32.71           N  
ATOM   1044  CA  LEU A 406      12.424 -19.738 -33.692  1.00 32.53           C  
ATOM   1045  C   LEU A 406      12.329 -19.554 -32.182  1.00 32.42           C  
ATOM   1046  O   LEU A 406      12.580 -20.553 -31.494  1.00 34.08           O  
ATOM   1047  CB  LEU A 406      13.886 -19.760 -34.124  1.00 29.97           C  
ATOM   1048  CG  LEU A 406      14.127 -20.029 -35.607  1.00 29.67           C  
ATOM   1049  CD1 LEU A 406      15.613 -19.958 -35.906  1.00 31.48           C  
ATOM   1050  CD2 LEU A 406      13.572 -21.392 -36.008  1.00 32.43           C  
ATOM   1051  N   ASN A 407      11.991 -18.359 -31.684  1.00 31.08           N  
ATOM   1052  CA  ASN A 407      11.972 -18.109 -30.223  1.00 31.78           C  
ATOM   1053  C   ASN A 407      10.554 -18.077 -29.661  1.00 36.93           C  
ATOM   1054  O   ASN A 407      10.408 -17.622 -28.522  1.00 44.00           O  
ATOM   1055  CB  ASN A 407      12.661 -16.807 -29.840  1.00 30.81           C  
ATOM   1056  CG  ASN A 407      12.899 -16.696 -28.355  1.00 24.83           C  
ATOM   1057  OD1 ASN A 407      13.240 -17.670 -27.713  1.00 23.92           O  
ATOM   1058  ND2 ASN A 407      12.751 -15.506 -27.814  1.00 25.26           N  
ATOM   1059  N   SER A 408       9.550 -18.557 -30.381  1.00 42.28           N  
ATOM   1060  CA  SER A 408       8.142 -18.534 -29.906  1.00 49.31           C  
ATOM   1061  C   SER A 408       7.842 -19.781 -29.042  1.00 52.35           C  
ATOM   1062  O   SER A 408       8.325 -20.853 -29.393  1.00 52.53           O  
ATOM   1063  CB  SER A 408       7.228 -18.370 -31.095  1.00 47.92           C  
ATOM   1064  OG  SER A 408       7.491 -19.371 -32.068  1.00 47.68           O  
ATOM   1065  N   SER A 409       7.097 -19.642 -27.930  1.00 63.72           N  
ATOM   1066  CA  SER A 409       6.643 -20.752 -27.034  1.00 58.41           C  
ATOM   1067  N   ASP A 421      15.803 -34.419 -29.289  1.00 52.29           N  
ATOM   1068  CA  ASP A 421      16.096 -34.562 -30.741  1.00 51.99           C  
ATOM   1069  C   ASP A 421      15.751 -33.231 -31.410  1.00 52.89           C  
ATOM   1070  O   ASP A 421      16.621 -32.386 -31.541  1.00 58.12           O  
ATOM   1071  N   SER A 422      14.490 -33.044 -31.765  1.00 55.18           N  
ATOM   1072  CA  SER A 422      13.957 -31.789 -32.344  1.00 52.99           C  
ATOM   1073  C   SER A 422      14.344 -30.587 -31.463  1.00 51.62           C  
ATOM   1074  O   SER A 422      14.945 -29.643 -32.001  1.00 54.74           O  
ATOM   1075  CB  SER A 422      12.473 -31.891 -32.551  1.00 47.10           C  
ATOM   1076  OG  SER A 422      12.062 -31.108 -33.662  1.00 45.75           O  
ATOM   1077  N   SER A 423      14.043 -30.604 -30.163  1.00 48.82           N  
ATOM   1078  CA  SER A 423      14.201 -29.416 -29.269  1.00 49.50           C  
ATOM   1079  C   SER A 423      15.652 -28.882 -29.232  1.00 50.11           C  
ATOM   1080  O   SER A 423      15.843 -27.689 -28.892  1.00 52.20           O  
ATOM   1081  CB  SER A 423      13.753 -29.732 -27.893  1.00 43.06           C  
ATOM   1082  OG  SER A 423      14.768 -30.470 -27.262  1.00 44.89           O  
ATOM   1083  N   ARG A 424      16.648 -29.730 -29.500  1.00 49.38           N  
ATOM   1084  CA  ARG A 424      18.091 -29.374 -29.433  1.00 48.97           C  
ATOM   1085  C   ARG A 424      18.488 -28.797 -30.793  1.00 47.68           C  
ATOM   1086  O   ARG A 424      19.260 -27.814 -30.826  1.00 48.18           O  
ATOM   1087  N   LYS A 425      17.964 -29.396 -31.865  1.00 42.23           N  
ATOM   1088  CA  LYS A 425      18.045 -28.841 -33.237  1.00 40.95           C  
ATOM   1089  C   LYS A 425      17.462 -27.415 -33.199  1.00 39.60           C  
ATOM   1090  O   LYS A 425      18.137 -26.503 -33.707  1.00 38.36           O  
ATOM   1091  CB  LYS A 425      17.365 -29.775 -34.244  1.00 40.09           C  
ATOM   1092  N   LEU A 426      16.314 -27.206 -32.549  1.00 33.64           N  
ATOM   1093  CA  LEU A 426      15.695 -25.868 -32.455  1.00 33.31           C  
ATOM   1094  C   LEU A 426      16.700 -24.911 -31.822  1.00 37.09           C  
ATOM   1095  O   LEU A 426      16.899 -23.796 -32.385  1.00 36.50           O  
ATOM   1096  CB  LEU A 426      14.409 -25.914 -31.630  1.00 35.58           C  
ATOM   1097  CG  LEU A 426      13.749 -24.548 -31.412  1.00 35.83           C  
ATOM   1098  CD1 LEU A 426      13.578 -23.804 -32.731  1.00 34.92           C  
ATOM   1099  CD2 LEU A 426      12.411 -24.681 -30.712  1.00 38.37           C  
ATOM   1100  N   ALA A 427      17.309 -25.325 -30.702  1.00 38.09           N  
ATOM   1101  CA  ALA A 427      18.218 -24.475 -29.887  1.00 35.64           C  
ATOM   1102  C   ALA A 427      19.437 -24.083 -30.721  1.00 38.03           C  
ATOM   1103  O   ALA A 427      19.894 -22.908 -30.654  1.00 37.20           O  
ATOM   1104  CB  ALA A 427      18.625 -25.217 -28.644  1.00 38.37           C  
ATOM   1105  N   HIS A 428      19.936 -25.047 -31.496  1.00 36.18           N  
ATOM   1106  CA  HIS A 428      21.084 -24.849 -32.405  1.00 40.53           C  
ATOM   1107  C   HIS A 428      20.603 -23.899 -33.505  1.00 36.15           C  
ATOM   1108  O   HIS A 428      21.317 -22.907 -33.784  1.00 39.61           O  
ATOM   1109  CB  HIS A 428      21.670 -26.206 -32.845  1.00 44.92           C  
ATOM   1110  CG  HIS A 428      22.543 -26.146 -34.057  1.00 57.63           C  
ATOM   1111  ND1 HIS A 428      23.932 -26.063 -33.977  1.00 64.69           N  
ATOM   1112  CD2 HIS A 428      22.239 -26.162 -35.378  1.00 61.61           C  
ATOM   1113  CE1 HIS A 428      24.434 -26.021 -35.199  1.00 64.95           C  
ATOM   1114  NE2 HIS A 428      23.414 -26.091 -36.075  1.00 64.85           N  
ATOM   1115  N   LEU A 429      19.419 -24.138 -34.065  1.00 31.89           N  
ATOM   1116  CA  LEU A 429      18.903 -23.277 -35.149  1.00 32.00           C  
ATOM   1117  C   LEU A 429      18.880 -21.846 -34.596  1.00 31.83           C  
ATOM   1118  O   LEU A 429      19.391 -20.954 -35.238  1.00 35.98           O  
ATOM   1119  CB  LEU A 429      17.532 -23.793 -35.603  1.00 35.10           C  
ATOM   1120  CG  LEU A 429      17.198 -23.605 -37.084  1.00 35.91           C  
ATOM   1121  N   LEU A 430      18.393 -21.650 -33.380  1.00 33.16           N  
ATOM   1122  CA  LEU A 430      18.203 -20.305 -32.779  1.00 35.18           C  
ATOM   1123  C   LEU A 430      19.565 -19.659 -32.443  1.00 35.74           C  
ATOM   1124  O   LEU A 430      19.724 -18.428 -32.674  1.00 32.13           O  
ATOM   1125  CB  LEU A 430      17.286 -20.494 -31.563  1.00 36.32           C  
ATOM   1126  CG  LEU A 430      16.993 -19.269 -30.697  1.00 39.53           C  
ATOM   1127  CD1 LEU A 430      16.497 -18.084 -31.520  1.00 42.08           C  
ATOM   1128  CD2 LEU A 430      15.983 -19.631 -29.604  1.00 42.71           C  
ATOM   1129  N   ASN A 431      20.541 -20.415 -31.931  1.00 31.94           N  
ATOM   1130  CA  ASN A 431      21.865 -19.826 -31.570  1.00 32.79           C  
ATOM   1131  C   ASN A 431      22.450 -19.262 -32.869  1.00 33.09           C  
ATOM   1132  O   ASN A 431      22.912 -18.092 -32.893  1.00 39.37           O  
ATOM   1133  CB  ASN A 431      22.800 -20.840 -30.874  1.00 35.94           C  
ATOM   1134  CG  ASN A 431      23.550 -20.296 -29.679  1.00 32.27           C  
ATOM   1135  N   ALA A 432      22.351 -20.047 -33.941  1.00 31.94           N  
ATOM   1136  CA  ALA A 432      22.954 -19.747 -35.259  1.00 29.43           C  
ATOM   1137  C   ALA A 432      22.334 -18.464 -35.811  1.00 28.52           C  
ATOM   1138  O   ALA A 432      23.074 -17.658 -36.375  1.00 32.36           O  
ATOM   1139  CB  ALA A 432      22.738 -20.898 -36.205  1.00 29.16           C  
ATOM   1140  N   VAL A 433      21.030 -18.255 -35.677  1.00 25.47           N  
ATOM   1141  CA  VAL A 433      20.468 -16.982 -36.219  1.00 26.08           C  
ATOM   1142  C   VAL A 433      20.906 -15.831 -35.306  1.00 25.15           C  
ATOM   1143  O   VAL A 433      21.106 -14.760 -35.828  1.00 24.96           O  
ATOM   1144  CB  VAL A 433      18.946 -16.992 -36.410  1.00 26.17           C  
ATOM   1145  CG1 VAL A 433      18.464 -15.648 -36.961  1.00 26.95           C  
ATOM   1146  CG2 VAL A 433      18.491 -18.128 -37.325  1.00 26.89           C  
ATOM   1147  N   THR A 434      21.071 -16.073 -33.999  1.00 27.77           N  
ATOM   1148  CA  THR A 434      21.621 -15.103 -33.018  1.00 26.40           C  
ATOM   1149  C   THR A 434      23.082 -14.779 -33.347  1.00 28.82           C  
ATOM   1150  O   THR A 434      23.437 -13.597 -33.329  1.00 32.84           O  
ATOM   1151  CB  THR A 434      21.414 -15.602 -31.590  1.00 28.98           C  
ATOM   1152  OG1 THR A 434      20.024 -15.917 -31.444  1.00 27.00           O  
ATOM   1153  CG2 THR A 434      21.835 -14.563 -30.568  1.00 29.35           C  
ATOM   1154  N   ASP A 435      23.900 -15.775 -33.687  1.00 32.04           N  
ATOM   1155  CA  ASP A 435      25.311 -15.555 -34.095  1.00 30.12           C  
ATOM   1156  C   ASP A 435      25.316 -14.641 -35.315  1.00 30.39           C  
ATOM   1157  O   ASP A 435      26.137 -13.694 -35.334  1.00 28.64           O  
ATOM   1158  CB  ASP A 435      26.064 -16.871 -34.359  1.00 35.08           C  
ATOM   1159  CG  ASP A 435      27.422 -16.707 -35.045  1.00 31.90           C  
ATOM   1160  N   ALA A 436      24.434 -14.929 -36.286  1.00 27.69           N  
ATOM   1161  CA  ALA A 436      24.253 -14.174 -37.546  1.00 25.67           C  
ATOM   1162  C   ALA A 436      23.897 -12.722 -37.214  1.00 27.70           C  
ATOM   1163  O   ALA A 436      24.515 -11.828 -37.794  1.00 29.40           O  
ATOM   1164  CB  ALA A 436      23.173 -14.814 -38.385  1.00 27.57           C  
ATOM   1165  N   LEU A 437      22.921 -12.470 -36.333  1.00 26.26           N  
ATOM   1166  CA  LEU A 437      22.627 -11.064 -35.934  1.00 28.21           C  
ATOM   1167  C   LEU A 437      23.881 -10.391 -35.303  1.00 32.08           C  
ATOM   1168  O   LEU A 437      24.121  -9.193 -35.605  1.00 32.88           O  
ATOM   1169  CB  LEU A 437      21.428 -10.996 -34.982  1.00 27.81           C  
ATOM   1170  CG  LEU A 437      21.061  -9.575 -34.543  1.00 29.92           C  
ATOM   1171  CD1 LEU A 437      20.852  -8.653 -35.756  1.00 28.91           C  
ATOM   1172  CD2 LEU A 437      19.832  -9.571 -33.634  1.00 29.29           C  
ATOM   1173  N   VAL A 438      24.636 -11.081 -34.434  1.00 29.26           N  
ATOM   1174  CA  VAL A 438      25.855 -10.510 -33.789  1.00 30.52           C  
ATOM   1175  C   VAL A 438      26.809 -10.154 -34.933  1.00 32.54           C  
ATOM   1176  O   VAL A 438      27.330  -9.019 -34.938  1.00 32.60           O  
ATOM   1177  CB  VAL A 438      26.472 -11.469 -32.747  1.00 32.72           C  
ATOM   1178  CG1 VAL A 438      27.929 -11.160 -32.419  1.00 32.87           C  
ATOM   1179  CG2 VAL A 438      25.660 -11.494 -31.473  1.00 30.63           C  
ATOM   1180  N   TRP A 439      26.896 -11.021 -35.946  1.00 32.27           N  
ATOM   1181  CA  TRP A 439      27.785 -10.802 -37.116  1.00 31.53           C  
ATOM   1182  C   TRP A 439      27.323  -9.518 -37.799  1.00 32.06           C  
ATOM   1183  O   TRP A 439      28.155  -8.598 -37.958  1.00 32.26           O  
ATOM   1184  CB  TRP A 439      27.808 -12.003 -38.073  1.00 32.48           C  
ATOM   1185  CG  TRP A 439      28.481 -11.687 -39.370  1.00 35.85           C  
ATOM   1186  CD1 TRP A 439      29.824 -11.546 -39.566  1.00 37.06           C  
ATOM   1187  CD2 TRP A 439      27.864 -11.436 -40.653  1.00 39.25           C  
ATOM   1188  NE1 TRP A 439      30.088 -11.225 -40.870  1.00 38.86           N  
ATOM   1189  CE2 TRP A 439      28.912 -11.152 -41.567  1.00 39.47           C  
ATOM   1190  CE3 TRP A 439      26.545 -11.404 -41.120  1.00 37.22           C  
ATOM   1191  CZ2 TRP A 439      28.683 -10.871 -42.915  1.00 39.22           C  
ATOM   1192  CZ3 TRP A 439      26.318 -11.099 -42.449  1.00 36.79           C  
ATOM   1193  CH2 TRP A 439      27.369 -10.841 -43.334  1.00 37.78           C  
ATOM   1194  N   VAL A 440      26.035  -9.415 -38.141  1.00 29.47           N  
ATOM   1195  CA  VAL A 440      25.564  -8.254 -38.949  1.00 28.50           C  
ATOM   1196  C   VAL A 440      25.930  -6.958 -38.206  1.00 29.36           C  
ATOM   1197  O   VAL A 440      26.402  -6.009 -38.838  1.00 32.83           O  
ATOM   1198  CB  VAL A 440      24.063  -8.302 -39.251  1.00 29.88           C  
ATOM   1199  CG1 VAL A 440      23.653  -7.061 -40.023  1.00 30.94           C  
ATOM   1200  CG2 VAL A 440      23.654  -9.573 -39.988  1.00 31.06           C  
ATOM   1201  N   ILE A 441      25.758  -6.935 -36.895  1.00 29.92           N  
ATOM   1202  CA  ILE A 441      26.057  -5.751 -36.041  1.00 30.53           C  
ATOM   1203  C   ILE A 441      27.560  -5.449 -36.044  1.00 29.53           C  
ATOM   1204  O   ILE A 441      27.916  -4.284 -36.082  1.00 32.49           O  
ATOM   1205  CB  ILE A 441      25.487  -5.958 -34.628  1.00 27.77           C  
ATOM   1206  CG1 ILE A 441      23.976  -6.170 -34.734  1.00 27.36           C  
ATOM   1207  CG2 ILE A 441      25.856  -4.767 -33.741  1.00 30.50           C  
ATOM   1208  CD1 ILE A 441      23.240  -6.344 -33.428  1.00 25.74           C  
ATOM   1209  N   ALA A 442      28.397  -6.472 -35.961  1.00 32.04           N  
ATOM   1210  CA  ALA A 442      29.863  -6.351 -36.037  1.00 35.97           C  
ATOM   1211  C   ALA A 442      30.255  -5.600 -37.325  1.00 36.85           C  
ATOM   1212  O   ALA A 442      31.042  -4.636 -37.261  1.00 37.19           O  
ATOM   1213  CB  ALA A 442      30.470  -7.731 -35.940  1.00 34.77           C  
ATOM   1214  N   LYS A 443      29.672  -5.987 -38.450  1.00 36.43           N  
ATOM   1215  CA  LYS A 443      30.016  -5.486 -39.811  1.00 40.12           C  
ATOM   1216  C   LYS A 443      29.707  -3.992 -39.959  1.00 40.75           C  
ATOM   1217  O   LYS A 443      30.217  -3.394 -40.938  1.00 47.22           O  
ATOM   1218  CB  LYS A 443      29.238  -6.292 -40.855  1.00 40.58           C  
ATOM   1219  CG  LYS A 443      29.621  -7.760 -40.906  1.00 44.91           C  
ATOM   1220  CD  LYS A 443      31.022  -7.983 -41.420  1.00 48.25           C  
ATOM   1221  CE  LYS A 443      31.294  -7.181 -42.673  1.00 53.08           C  
ATOM   1222  NZ  LYS A 443      32.466  -7.681 -43.424  1.00 55.26           N  
ATOM   1223  N   SER A 444      28.898  -3.412 -39.071  1.00 34.75           N  
ATOM   1224  CA  SER A 444      28.648  -1.951 -39.023  1.00 38.30           C  
ATOM   1225  C   SER A 444      29.921  -1.260 -38.541  1.00 43.73           C  
ATOM   1226  O   SER A 444      30.006  -0.023 -38.676  1.00 42.32           O  
ATOM   1227  CB  SER A 444      27.494  -1.593 -38.109  1.00 39.93           C  
ATOM   1228  OG  SER A 444      27.893  -1.585 -36.747  1.00 37.57           O  
ATOM   1229  N   GLY A 445      30.801  -2.036 -37.892  1.00 45.69           N  
ATOM   1230  CA  GLY A 445      32.085  -1.579 -37.342  1.00 48.84           C  
ATOM   1231  C   GLY A 445      31.932  -0.515 -36.259  1.00 53.75           C  
ATOM   1232  O   GLY A 445      32.890   0.278 -36.110  1.00 54.84           O  
ATOM   1233  N   ILE A 446      30.813  -0.471 -35.512  1.00 45.85           N  
ATOM   1234  CA  ILE A 446      30.720   0.406 -34.304  1.00 39.72           C  
ATOM   1235  C   ILE A 446      31.471  -0.302 -33.177  1.00 41.62           C  
ATOM   1236  O   ILE A 446      31.790  -1.518 -33.327  1.00 39.18           O  
ATOM   1237  CB  ILE A 446      29.271   0.745 -33.904  1.00 37.91           C  
ATOM   1238  CG1 ILE A 446      28.509  -0.488 -33.395  1.00 35.49           C  
ATOM   1239  CG2 ILE A 446      28.571   1.471 -35.040  1.00 37.18           C  
ATOM   1240  CD1 ILE A 446      27.014  -0.445 -33.560  1.00 33.99           C  
ATOM   1241  N   SER A 447      31.736   0.417 -32.084  1.00 42.59           N  
ATOM   1242  CA  SER A 447      32.493  -0.117 -30.925  1.00 40.65           C  
ATOM   1243  C   SER A 447      31.754  -1.353 -30.408  1.00 43.41           C  
ATOM   1244  O   SER A 447      30.532  -1.430 -30.671  1.00 36.31           O  
ATOM   1245  CB  SER A 447      32.670   0.927 -29.847  1.00 42.34           C  
ATOM   1246  OG  SER A 447      31.437   1.312 -29.255  1.00 42.18           O  
ATOM   1247  N   SER A 448      32.488  -2.263 -29.747  1.00 39.34           N  
ATOM   1248  CA  SER A 448      31.997  -3.441 -28.985  1.00 41.84           C  
ATOM   1249  C   SER A 448      30.886  -3.025 -27.988  1.00 43.47           C  
ATOM   1250  O   SER A 448      29.782  -3.576 -28.071  1.00 43.24           O  
ATOM   1251  CB  SER A 448      33.154  -4.122 -28.296  1.00 40.18           C  
ATOM   1252  OG  SER A 448      33.028  -5.529 -28.382  1.00 48.10           O  
ATOM   1253  N   GLN A 449      31.159  -2.099 -27.065  1.00 42.72           N  
ATOM   1254  CA  GLN A 449      30.152  -1.465 -26.173  1.00 41.82           C  
ATOM   1255  C   GLN A 449      28.856  -1.259 -26.968  1.00 42.36           C  
ATOM   1256  O   GLN A 449      27.781  -1.687 -26.495  1.00 36.09           O  
ATOM   1257  CB  GLN A 449      30.674  -0.119 -25.657  1.00 43.52           C  
ATOM   1258  CG  GLN A 449      29.603   0.924 -25.305  1.00 43.71           C  
ATOM   1259  CD  GLN A 449      28.705   0.450 -24.192  1.00 48.81           C  
ATOM   1260  OE1 GLN A 449      28.882  -0.650 -23.670  1.00 56.41           O  
ATOM   1261  NE2 GLN A 449      27.722   1.266 -23.830  1.00 51.13           N  
ATOM   1262  N   GLN A 450      28.979  -0.614 -28.133  1.00 39.85           N  
ATOM   1263  CA  GLN A 450      27.843  -0.107 -28.946  1.00 40.25           C  
ATOM   1264  C   GLN A 450      27.175  -1.261 -29.718  1.00 34.44           C  
ATOM   1265  O   GLN A 450      25.981  -1.134 -29.964  1.00 28.29           O  
ATOM   1266  CB  GLN A 450      28.298   1.048 -29.840  1.00 40.15           C  
ATOM   1267  CG  GLN A 450      28.348   2.384 -29.094  1.00 46.44           C  
ATOM   1268  CD  GLN A 450      26.999   2.870 -28.594  1.00 54.89           C  
ATOM   1269  OE1 GLN A 450      26.215   3.452 -29.343  1.00 64.73           O  
ATOM   1270  NE2 GLN A 450      26.709   2.654 -27.314  1.00 49.28           N  
ATOM   1271  N   GLN A 451      27.918  -2.332 -30.043  1.00 30.92           N  
ATOM   1272  CA  GLN A 451      27.379  -3.543 -30.699  1.00 29.29           C  
ATOM   1273  C   GLN A 451      26.442  -4.224 -29.706  1.00 28.91           C  
ATOM   1274  O   GLN A 451      25.405  -4.668 -30.116  1.00 31.14           O  
ATOM   1275  CB  GLN A 451      28.484  -4.486 -31.155  1.00 26.70           C  
ATOM   1276  CG  GLN A 451      29.271  -3.958 -32.343  1.00 27.16           C  
ATOM   1277  CD  GLN A 451      30.424  -4.869 -32.668  1.00 28.04           C  
ATOM   1278  OE1 GLN A 451      30.396  -6.071 -32.420  1.00 31.63           O  
ATOM   1279  NE2 GLN A 451      31.462  -4.298 -33.239  1.00 29.48           N  
ATOM   1280  N   SER A 452      26.842  -4.296 -28.446  1.00 32.26           N  
ATOM   1281  CA  SER A 452      26.063  -4.867 -27.322  1.00 32.53           C  
ATOM   1282  C   SER A 452      24.797  -4.020 -27.080  1.00 30.00           C  
ATOM   1283  O   SER A 452      23.711  -4.569 -26.988  1.00 28.81           O  
ATOM   1284  CB  SER A 452      26.951  -4.953 -26.122  1.00 34.33           C  
ATOM   1285  OG  SER A 452      27.666  -6.175 -26.126  1.00 40.48           O  
ATOM   1286  N   MET A 453      24.953  -2.709 -27.008  1.00 27.57           N  
ATOM   1287  CA  MET A 453      23.856  -1.745 -26.804  1.00 28.50           C  
ATOM   1288  C   MET A 453      22.879  -1.820 -27.975  1.00 29.16           C  
ATOM   1289  O   MET A 453      21.686  -1.803 -27.733  1.00 24.34           O  
ATOM   1290  CB  MET A 453      24.398  -0.322 -26.660  1.00 28.45           C  
ATOM   1291  CG  MET A 453      25.144  -0.111 -25.330  1.00 31.88           C  
ATOM   1292  SD  MET A 453      24.160  -0.372 -23.780  1.00 35.12           S  
ATOM   1293  CE  MET A 453      22.823   0.802 -24.012  1.00 31.00           C  
ATOM   1294  N   ARG A 454      23.376  -1.938 -29.201  1.00 30.87           N  
ATOM   1295  CA  ARG A 454      22.495  -2.028 -30.375  1.00 28.62           C  
ATOM   1296  C   ARG A 454      21.700  -3.318 -30.279  1.00 29.13           C  
ATOM   1297  O   ARG A 454      20.516  -3.235 -30.548  1.00 28.70           O  
ATOM   1298  CB  ARG A 454      23.265  -2.026 -31.693  1.00 31.05           C  
ATOM   1299  CG  ARG A 454      22.327  -1.913 -32.888  1.00 31.77           C  
ATOM   1300  CD  ARG A 454      23.042  -1.516 -34.156  1.00 31.85           C  
ATOM   1301  NE  ARG A 454      22.120  -1.534 -35.276  1.00 31.78           N  
ATOM   1302  CZ  ARG A 454      21.286  -0.560 -35.557  1.00 34.62           C  
ATOM   1303  NH1 ARG A 454      21.250   0.506 -34.780  1.00 37.09           N  
ATOM   1304  NH2 ARG A 454      20.476  -0.655 -36.597  1.00 35.00           N  
ATOM   1305  N   LEU A 455      22.381  -4.441 -30.006  1.00 25.57           N  
ATOM   1306  CA  LEU A 455      21.819  -5.801 -29.926  1.00 26.09           C  
ATOM   1307  C   LEU A 455      20.661  -5.759 -28.927  1.00 27.60           C  
ATOM   1308  O   LEU A 455      19.560  -6.170 -29.305  1.00 27.91           O  
ATOM   1309  CB  LEU A 455      22.895  -6.801 -29.469  1.00 28.47           C  
ATOM   1310  CG  LEU A 455      22.392  -8.224 -29.220  1.00 30.84           C  
ATOM   1311  CD1 LEU A 455      21.586  -8.695 -30.417  1.00 31.58           C  
ATOM   1312  CD2 LEU A 455      23.540  -9.198 -28.962  1.00 34.04           C  
ATOM   1313  N   ALA A 456      20.910  -5.267 -27.711  1.00 25.73           N  
ATOM   1314  CA  ALA A 456      19.890  -5.121 -26.645  1.00 29.80           C  
ATOM   1315  C   ALA A 456      18.696  -4.301 -27.137  1.00 28.07           C  
ATOM   1316  O   ALA A 456      17.569  -4.705 -26.859  1.00 26.71           O  
ATOM   1317  CB  ALA A 456      20.475  -4.479 -25.412  1.00 29.65           C  
ATOM   1318  N   ASN A 457      18.940  -3.167 -27.792  1.00 26.23           N  
ATOM   1319  CA  ASN A 457      17.844  -2.250 -28.191  1.00 29.94           C  
ATOM   1320  C   ASN A 457      16.923  -2.913 -29.214  1.00 29.74           C  
ATOM   1321  O   ASN A 457      15.737  -2.603 -29.176  1.00 31.18           O  
ATOM   1322  CB  ASN A 457      18.363  -0.937 -28.755  1.00 30.52           C  
ATOM   1323  CG  ASN A 457      18.859  -0.043 -27.652  1.00 32.31           C  
ATOM   1324  OD1 ASN A 457      18.403  -0.165 -26.527  1.00 48.47           O  
ATOM   1325  ND2 ASN A 457      19.783   0.842 -27.962  1.00 35.41           N  
ATOM   1326  N   LEU A 458      17.484  -3.726 -30.116  1.00 30.81           N  
ATOM   1327  CA  LEU A 458      16.745  -4.448 -31.179  1.00 30.35           C  
ATOM   1328  C   LEU A 458      15.923  -5.552 -30.512  1.00 29.01           C  
ATOM   1329  O   LEU A 458      14.766  -5.711 -30.890  1.00 26.95           O  
ATOM   1330  CB  LEU A 458      17.701  -5.031 -32.225  1.00 30.60           C  
ATOM   1331  CG  LEU A 458      18.482  -4.024 -33.083  1.00 34.61           C  
ATOM   1332  CD1 LEU A 458      19.465  -4.737 -34.018  1.00 36.93           C  
ATOM   1333  CD2 LEU A 458      17.549  -3.138 -33.889  1.00 36.58           C  
ATOM   1334  N   LEU A 459      16.502  -6.276 -29.562  1.00 27.82           N  
ATOM   1335  CA  LEU A 459      15.820  -7.418 -28.903  1.00 32.91           C  
ATOM   1336  C   LEU A 459      14.706  -6.892 -27.984  1.00 32.60           C  
ATOM   1337  O   LEU A 459      13.609  -7.503 -27.903  1.00 37.71           O  
ATOM   1338  CB  LEU A 459      16.841  -8.241 -28.110  1.00 34.31           C  
ATOM   1339  CG  LEU A 459      17.790  -9.080 -28.947  1.00 36.90           C  
ATOM   1340  CD1 LEU A 459      18.598 -10.009 -28.050  1.00 41.60           C  
ATOM   1341  CD2 LEU A 459      17.034  -9.867 -29.997  1.00 38.65           C  
ATOM   1342  N   MET A 460      14.955  -5.788 -27.307  1.00 30.82           N  
ATOM   1343  CA  MET A 460      13.917  -5.198 -26.438  1.00 34.22           C  
ATOM   1344  C   MET A 460      12.714  -4.759 -27.279  1.00 33.80           C  
ATOM   1345  O   MET A 460      11.598  -4.918 -26.786  1.00 33.37           O  
ATOM   1346  CB  MET A 460      14.483  -4.052 -25.602  1.00 31.65           C  
ATOM   1347  CG  MET A 460      15.364  -4.591 -24.508  1.00 35.97           C  
ATOM   1348  SD  MET A 460      15.770  -3.368 -23.281  1.00 43.05           S  
ATOM   1349  CE  MET A 460      16.814  -2.257 -24.240  1.00 37.88           C  
ATOM   1350  N   LEU A 461      12.921  -4.288 -28.503  1.00 33.99           N  
ATOM   1351  CA  LEU A 461      11.814  -3.807 -29.367  1.00 36.89           C  
ATOM   1352  C   LEU A 461      10.920  -4.979 -29.744  1.00 37.48           C  
ATOM   1353  O   LEU A 461       9.727  -4.744 -29.973  1.00 37.84           O  
ATOM   1354  CB  LEU A 461      12.355  -3.110 -30.616  1.00 36.20           C  
ATOM   1355  CG  LEU A 461      12.451  -1.606 -30.464  1.00 37.97           C  
ATOM   1356  CD1 LEU A 461      13.012  -0.979 -31.722  1.00 39.98           C  
ATOM   1357  CD2 LEU A 461      11.087  -1.023 -30.092  1.00 38.93           C  
ATOM   1358  N   LEU A 462      11.470  -6.188 -29.749  1.00 39.46           N  
ATOM   1359  CA  LEU A 462      10.737  -7.384 -30.209  1.00 41.83           C  
ATOM   1360  C   LEU A 462       9.565  -7.594 -29.264  1.00 41.18           C  
ATOM   1361  O   LEU A 462       8.490  -7.890 -29.758  1.00 48.36           O  
ATOM   1362  CB  LEU A 462      11.659  -8.611 -30.294  1.00 45.10           C  
ATOM   1363  CG  LEU A 462      12.701  -8.579 -31.427  1.00 47.65           C  
ATOM   1364  CD1 LEU A 462      13.381  -9.940 -31.626  1.00 42.19           C  
ATOM   1365  CD2 LEU A 462      12.095  -8.081 -32.736  1.00 46.91           C  
ATOM   1366  N   SER A 463       9.745  -7.410 -27.962  1.00 41.26           N  
ATOM   1367  CA  SER A 463       8.637  -7.560 -26.990  1.00 41.23           C  
ATOM   1368  C   SER A 463       7.520  -6.555 -27.329  1.00 37.37           C  
ATOM   1369  O   SER A 463       6.376  -6.914 -27.067  1.00 38.12           O  
ATOM   1370  CB  SER A 463       9.098  -7.461 -25.554  1.00 40.55           C  
ATOM   1371  OG  SER A 463       9.805  -6.256 -25.339  1.00 49.04           O  
ATOM   1372  N   HIS A 464       7.817  -5.384 -27.909  1.00 29.93           N  
ATOM   1373  CA  HIS A 464       6.781  -4.408 -28.354  1.00 35.61           C  
ATOM   1374  C   HIS A 464       6.041  -4.927 -29.609  1.00 39.91           C  
ATOM   1375  O   HIS A 464       4.819  -4.695 -29.701  1.00 37.52           O  
ATOM   1376  CB  HIS A 464       7.362  -3.001 -28.563  1.00 35.57           C  
ATOM   1377  CG  HIS A 464       8.026  -2.459 -27.346  1.00 36.00           C  
ATOM   1378  ND1 HIS A 464       7.468  -1.454 -26.593  1.00 40.93           N  
ATOM   1379  CD2 HIS A 464       9.176  -2.801 -26.727  1.00 36.53           C  
ATOM   1380  CE1 HIS A 464       8.251  -1.186 -25.566  1.00 40.01           C  
ATOM   1381  NE2 HIS A 464       9.302  -2.008 -25.620  1.00 37.37           N  
ATOM   1382  N   VAL A 465       6.735  -5.633 -30.514  1.00 39.54           N  
ATOM   1383  CA  VAL A 465       6.138  -6.359 -31.670  1.00 37.14           C  
ATOM   1384  C   VAL A 465       5.222  -7.475 -31.155  1.00 38.49           C  
ATOM   1385  O   VAL A 465       4.137  -7.696 -31.769  1.00 40.76           O  
ATOM   1386  CB  VAL A 465       7.191  -6.947 -32.625  1.00 36.33           C  
ATOM   1387  CG1 VAL A 465       6.510  -7.600 -33.837  1.00 35.19           C  
ATOM   1388  CG2 VAL A 465       8.173  -5.875 -33.083  1.00 38.37           C  
ATOM   1389  N   ARG A 466       5.644  -8.193 -30.119  1.00 34.38           N  
ATOM   1390  CA  ARG A 466       4.895  -9.372 -29.593  1.00 37.03           C  
ATOM   1391  C   ARG A 466       3.626  -8.837 -28.894  1.00 40.38           C  
ATOM   1392  O   ARG A 466       2.524  -9.327 -29.193  1.00 45.91           O  
ATOM   1393  CB  ARG A 466       5.832 -10.243 -28.749  1.00 33.98           C  
ATOM   1394  CG  ARG A 466       5.225 -11.536 -28.237  1.00 40.97           C  
ATOM   1395  N   HIS A 467       3.734  -7.759 -28.123  1.00 37.72           N  
ATOM   1396  CA  HIS A 467       2.569  -7.069 -27.509  1.00 40.15           C  
ATOM   1397  C   HIS A 467       1.541  -6.671 -28.585  1.00 34.27           C  
ATOM   1398  O   HIS A 467       0.364  -6.856 -28.344  1.00 34.35           O  
ATOM   1399  CB  HIS A 467       3.006  -5.860 -26.669  1.00 39.91           C  
ATOM   1400  CG  HIS A 467       1.867  -5.230 -25.934  1.00 43.89           C  
ATOM   1401  ND1 HIS A 467       1.373  -3.974 -26.260  1.00 45.97           N  
ATOM   1402  CD2 HIS A 467       1.099  -5.686 -24.918  1.00 45.22           C  
ATOM   1403  CE1 HIS A 467       0.383  -3.669 -25.451  1.00 43.87           C  
ATOM   1404  NE2 HIS A 467       0.192  -4.703 -24.621  1.00 45.37           N  
ATOM   1405  N   ALA A 468       1.975  -6.127 -29.714  1.00 30.85           N  
ATOM   1406  CA  ALA A 468       1.083  -5.585 -30.758  1.00 33.57           C  
ATOM   1407  C   ALA A 468       0.372  -6.760 -31.444  1.00 37.14           C  
ATOM   1408  O   ALA A 468      -0.767  -6.612 -31.889  1.00 34.68           O  
ATOM   1409  CB  ALA A 468       1.872  -4.742 -31.728  1.00 32.30           C  
ATOM   1410  N   SER A 469       1.036  -7.910 -31.495  1.00 42.07           N  
ATOM   1411  CA  SER A 469       0.514  -9.144 -32.121  1.00 43.23           C  
ATOM   1412  C   SER A 469      -0.438  -9.818 -31.133  1.00 37.47           C  
ATOM   1413  O   SER A 469      -1.462 -10.302 -31.594  1.00 38.08           O  
ATOM   1414  CB  SER A 469       1.626 -10.046 -32.609  1.00 39.20           C  
ATOM   1415  OG  SER A 469       2.245 -10.724 -31.541  1.00 43.17           O  
ATOM   1416  N   ASN A 470      -0.120  -9.823 -29.839  1.00 38.67           N  
ATOM   1417  CA  ASN A 470      -1.066 -10.215 -28.754  1.00 42.45           C  
ATOM   1418  C   ASN A 470      -2.385  -9.426 -28.912  1.00 36.05           C  
ATOM   1419  O   ASN A 470      -3.414 -10.067 -28.909  1.00 31.18           O  
ATOM   1420  CB  ASN A 470      -0.473 -10.017 -27.354  1.00 49.76           C  
ATOM   1421  CG  ASN A 470       0.900 -10.643 -27.185  1.00 57.00           C  
ATOM   1422  OD1 ASN A 470       1.791 -10.066 -26.555  1.00 68.37           O  
ATOM   1423  ND2 ASN A 470       1.099 -11.807 -27.771  1.00 56.80           N  
ATOM   1424  N   LYS A 471      -2.348  -8.096 -29.087  1.00 31.97           N  
ATOM   1425  CA  LYS A 471      -3.565  -7.245 -29.214  1.00 37.64           C  
ATOM   1426  C   LYS A 471      -4.297  -7.572 -30.534  1.00 43.87           C  
ATOM   1427  O   LYS A 471      -5.520  -7.662 -30.484  1.00 41.91           O  
ATOM   1428  CB  LYS A 471      -3.254  -5.747 -29.138  1.00 36.37           C  
ATOM   1429  N   GLY A 472      -3.573  -7.781 -31.652  1.00 42.59           N  
ATOM   1430  CA  GLY A 472      -4.135  -8.072 -32.990  1.00 35.19           C  
ATOM   1431  C   GLY A 472      -4.858  -9.414 -33.034  1.00 33.19           C  
ATOM   1432  O   GLY A 472      -5.890  -9.488 -33.709  1.00 29.16           O  
ATOM   1433  N   MET A 473      -4.296 -10.429 -32.368  1.00 32.96           N  
ATOM   1434  CA  MET A 473      -4.850 -11.801 -32.226  1.00 39.33           C  
ATOM   1435  C   MET A 473      -6.179 -11.749 -31.455  1.00 40.22           C  
ATOM   1436  O   MET A 473      -7.119 -12.434 -31.884  1.00 36.02           O  
ATOM   1437  CB  MET A 473      -3.875 -12.723 -31.488  1.00 37.52           C  
ATOM   1438  CG  MET A 473      -4.165 -14.182 -31.751  1.00 45.35           C  
ATOM   1439  SD  MET A 473      -3.879 -14.679 -33.490  1.00 50.65           S  
ATOM   1440  CE  MET A 473      -2.126 -15.034 -33.447  1.00 46.69           C  
ATOM   1441  N   GLU A 474      -6.211 -10.972 -30.362  1.00 42.96           N  
ATOM   1442  CA  GLU A 474      -7.384 -10.677 -29.500  1.00 42.74           C  
ATOM   1443  C   GLU A 474      -8.476 -10.028 -30.355  1.00 38.41           C  
ATOM   1444  O   GLU A 474      -9.619 -10.499 -30.327  1.00 39.96           O  
ATOM   1445  CB  GLU A 474      -6.974  -9.764 -28.342  1.00 46.59           C  
ATOM   1446  CG  GLU A 474      -7.978  -9.723 -27.193  1.00 56.63           C  
ATOM   1447  CD  GLU A 474      -7.579  -8.937 -25.938  1.00 66.46           C  
ATOM   1448  OE1 GLU A 474      -6.587  -8.151 -25.975  1.00 59.99           O  
ATOM   1449  OE2 GLU A 474      -8.269  -9.118 -24.900  1.00 73.78           O  
ATOM   1450  N   HIS A 475      -8.135  -8.986 -31.093  1.00 33.89           N  
ATOM   1451  CA  HIS A 475      -9.085  -8.262 -31.971  1.00 37.72           C  
ATOM   1452  C   HIS A 475      -9.653  -9.224 -33.022  1.00 40.53           C  
ATOM   1453  O   HIS A 475     -10.868  -9.179 -33.277  1.00 36.20           O  
ATOM   1454  CB  HIS A 475      -8.395  -7.077 -32.633  1.00 36.51           C  
ATOM   1455  CG  HIS A 475      -9.331  -6.117 -33.273  1.00 37.03           C  
ATOM   1456  ND1 HIS A 475      -9.739  -6.249 -34.583  1.00 40.42           N  
ATOM   1457  CD2 HIS A 475      -9.905  -4.995 -32.803  1.00 36.42           C  
ATOM   1458  CE1 HIS A 475     -10.563  -5.267 -34.881  1.00 38.66           C  
ATOM   1459  NE2 HIS A 475     -10.666  -4.481 -33.809  1.00 39.37           N  
ATOM   1460  N   LEU A 476      -8.781 -10.032 -33.636  1.00 41.75           N  
ATOM   1461  CA  LEU A 476      -9.121 -10.842 -34.827  1.00 37.32           C  
ATOM   1462  C   LEU A 476      -9.975 -12.027 -34.374  1.00 33.55           C  
ATOM   1463  O   LEU A 476     -10.958 -12.332 -35.063  1.00 31.01           O  
ATOM   1464  CB  LEU A 476      -7.841 -11.287 -35.531  1.00 37.47           C  
ATOM   1465  CG  LEU A 476      -8.007 -12.302 -36.655  1.00 38.99           C  
ATOM   1466  CD1 LEU A 476      -9.057 -11.872 -37.663  1.00 38.83           C  
ATOM   1467  CD2 LEU A 476      -6.676 -12.517 -37.349  1.00 43.29           C  
ATOM   1468  N   LEU A 477      -9.629 -12.643 -33.249  1.00 31.06           N  
ATOM   1469  CA  LEU A 477     -10.443 -13.736 -32.646  1.00 36.80           C  
ATOM   1470  C   LEU A 477     -11.841 -13.202 -32.274  1.00 35.99           C  
ATOM   1471  O   LEU A 477     -12.756 -13.997 -32.223  1.00 35.44           O  
ATOM   1472  CB  LEU A 477      -9.748 -14.292 -31.397  1.00 39.00           C  
ATOM   1473  CG  LEU A 477      -8.650 -15.334 -31.618  1.00 40.73           C  
ATOM   1474  CD2 LEU A 477      -7.701 -15.312 -30.420  1.00 39.22           C  
ATOM   1475  N   ASN A 478     -11.959 -11.920 -31.924  1.00 36.43           N  
ATOM   1476  CA  ASN A 478     -13.231 -11.290 -31.515  1.00 39.51           C  
ATOM   1477  C   ASN A 478     -14.117 -11.104 -32.752  1.00 43.34           C  
ATOM   1478  O   ASN A 478     -15.333 -11.346 -32.632  1.00 39.15           O  
ATOM   1479  CB  ASN A 478     -12.970  -9.970 -30.812  1.00 44.06           C  
ATOM   1480  CG  ASN A 478     -14.076  -9.630 -29.849  1.00 48.79           C  
ATOM   1481  OD1 ASN A 478     -14.927  -8.806 -30.164  1.00 50.26           O  
ATOM   1482  ND2 ASN A 478     -14.088 -10.295 -28.705  1.00 46.79           N  
ATOM   1483  N   MET A 479     -13.517 -10.713 -33.891  1.00 39.97           N  
ATOM   1484  CA  MET A 479     -14.204 -10.521 -35.191  1.00 39.94           C  
ATOM   1485  C   MET A 479     -14.643 -11.887 -35.743  1.00 40.75           C  
ATOM   1486  O   MET A 479     -15.672 -11.921 -36.463  1.00 40.26           O  
ATOM   1487  CB  MET A 479     -13.289  -9.840 -36.217  1.00 43.10           C  
ATOM   1488  CG  MET A 479     -12.726  -8.510 -35.760  1.00 48.09           C  
ATOM   1489  SD  MET A 479     -13.754  -7.067 -36.148  1.00 51.35           S  
ATOM   1490  N   LYS A 480     -13.880 -12.960 -35.470  1.00 39.72           N  
ATOM   1491  CA  LYS A 480     -14.196 -14.332 -35.951  1.00 41.91           C  
ATOM   1492  C   LYS A 480     -15.419 -14.866 -35.177  1.00 37.80           C  
ATOM   1493  O   LYS A 480     -16.351 -15.351 -35.825  1.00 36.31           O  
ATOM   1494  CB  LYS A 480     -12.988 -15.268 -35.829  1.00 44.29           C  
ATOM   1495  CG  LYS A 480     -13.305 -16.749 -36.025  1.00 44.84           C  
ATOM   1496  CD  LYS A 480     -12.596 -17.690 -35.031  1.00 55.15           C  
ATOM   1497  CE  LYS A 480     -12.949 -17.491 -33.562  1.00 62.51           C  
ATOM   1498  NZ  LYS A 480     -14.320 -17.957 -33.214  1.00 66.14           N  
ATOM   1499  N   SER A 481     -15.422 -14.753 -33.850  1.00 36.41           N  
ATOM   1500  CA  SER A 481     -16.530 -15.166 -32.938  1.00 41.19           C  
ATOM   1501  C   SER A 481     -17.872 -14.601 -33.412  1.00 42.14           C  
ATOM   1502  O   SER A 481     -18.875 -15.337 -33.328  1.00 45.52           O  
ATOM   1503  CB  SER A 481     -16.280 -14.710 -31.543  1.00 39.97           C  
ATOM   1504  OG  SER A 481     -16.376 -13.305 -31.492  1.00 47.21           O  
ATOM   1505  N   LYS A 482     -17.862 -13.336 -33.846  1.00 39.49           N  
ATOM   1506  CA  LYS A 482     -19.030 -12.596 -34.372  1.00 41.48           C  
ATOM   1507  C   LYS A 482     -19.121 -12.816 -35.882  1.00 40.60           C  
ATOM   1508  O   LYS A 482     -19.964 -12.169 -36.503  1.00 40.00           O  
ATOM   1509  CB  LYS A 482     -18.928 -11.119 -33.962  1.00 44.71           C  
ATOM   1510  CG  LYS A 482     -19.531 -10.845 -32.584  1.00 47.55           C  
ATOM   1511  CD  LYS A 482     -19.522  -9.398 -32.141  1.00 48.15           C  
ATOM   1512  CE  LYS A 482     -20.477  -9.113 -30.995  1.00 48.45           C  
ATOM   1513  NZ  LYS A 482     -20.204  -7.792 -30.378  1.00 47.71           N  
ATOM   1514  N   ASN A 483     -18.264 -13.682 -36.437  1.00 42.52           N  
ATOM   1515  CA  ASN A 483     -18.229 -14.083 -37.871  1.00 41.45           C  
ATOM   1516  C   ASN A 483     -18.325 -12.850 -38.769  1.00 36.07           C  
ATOM   1517  O   ASN A 483     -19.043 -12.949 -39.755  1.00 34.04           O  
ATOM   1518  CB  ASN A 483     -19.353 -15.071 -38.231  1.00 39.49           C  
ATOM   1519  CG  ASN A 483     -19.616 -16.110 -37.151  1.00 44.41           C  
ATOM   1520  OD1 ASN A 483     -20.472 -15.928 -36.261  1.00 40.93           O  
ATOM   1521  ND2 ASN A 483     -18.872 -17.204 -37.204  1.00 48.19           N  
ATOM   1522  N   VAL A 484     -17.647 -11.740 -38.459  1.00 38.64           N  
ATOM   1523  CA  VAL A 484     -17.671 -10.530 -39.350  1.00 44.12           C  
ATOM   1524  C   VAL A 484     -16.467 -10.485 -40.307  1.00 47.22           C  
ATOM   1525  O   VAL A 484     -16.371  -9.501 -41.066  1.00 48.18           O  
ATOM   1526  CB  VAL A 484     -17.766  -9.223 -38.550  1.00 48.66           C  
ATOM   1527  CG1 VAL A 484     -18.926  -9.303 -37.579  1.00 53.46           C  
ATOM   1528  CG2 VAL A 484     -16.468  -8.859 -37.839  1.00 49.78           C  
ATOM   1529  N   VAL A 485     -15.610 -11.505 -40.306  1.00 46.23           N  
ATOM   1530  CA  VAL A 485     -14.390 -11.538 -41.157  1.00 55.01           C  
ATOM   1531  C   VAL A 485     -14.558 -12.715 -42.091  1.00 49.16           C  
ATOM   1532  O   VAL A 485     -14.873 -13.797 -41.623  1.00 53.82           O  
ATOM   1533  CB  VAL A 485     -13.065 -11.639 -40.362  1.00 56.28           C  
ATOM   1534  CG1 VAL A 485     -12.680 -10.306 -39.729  1.00 58.23           C  
ATOM   1535  CG2 VAL A 485     -13.063 -12.758 -39.326  1.00 57.60           C  
ATOM   1536  N   PRO A 486     -14.384 -12.517 -43.415  1.00 52.69           N  
ATOM   1537  CA  PRO A 486     -14.429 -13.606 -44.385  1.00 50.50           C  
ATOM   1538  C   PRO A 486     -13.733 -14.878 -43.899  1.00 54.43           C  
ATOM   1539  O   PRO A 486     -12.621 -14.771 -43.388  1.00 49.46           O  
ATOM   1540  CB  PRO A 486     -13.676 -12.996 -45.560  1.00 46.51           C  
ATOM   1541  CG  PRO A 486     -14.129 -11.563 -45.538  1.00 51.35           C  
ATOM   1542  CD  PRO A 486     -14.223 -11.208 -44.067  1.00 55.15           C  
ATOM   1543  N   VAL A 487     -14.423 -16.014 -44.048  1.00 56.02           N  
ATOM   1544  CA  VAL A 487     -13.881 -17.378 -43.795  1.00 61.25           C  
ATOM   1545  C   VAL A 487     -12.725 -17.595 -44.776  1.00 65.02           C  
ATOM   1546  O   VAL A 487     -13.007 -17.735 -45.986  1.00 63.73           O  
ATOM   1547  N   TYR A 488     -11.479 -17.569 -44.286  1.00 58.11           N  
ATOM   1548  CA  TYR A 488     -10.278 -17.968 -45.065  1.00 53.74           C  
ATOM   1549  C   TYR A 488      -9.552 -19.098 -44.322  1.00 48.98           C  
ATOM   1550  O   TYR A 488      -9.084 -18.885 -43.204  1.00 48.46           O  
ATOM   1551  CB  TYR A 488      -9.352 -16.779 -45.322  1.00 55.79           C  
ATOM   1552  CG  TYR A 488      -9.908 -15.650 -46.155  1.00 55.45           C  
ATOM   1553  CD1 TYR A 488     -10.589 -15.886 -47.339  1.00 59.75           C  
ATOM   1554  CD2 TYR A 488      -9.721 -14.328 -45.771  1.00 52.98           C  
ATOM   1555  CE1 TYR A 488     -11.109 -14.845 -48.097  1.00 56.59           C  
ATOM   1556  CE2 TYR A 488     -10.211 -13.277 -46.530  1.00 53.63           C  
ATOM   1557  CZ  TYR A 488     -10.914 -13.537 -47.693  1.00 54.20           C  
ATOM   1558  OH  TYR A 488     -11.399 -12.507 -48.438  1.00 53.26           O  
ATOM   1559  N   ASP A 489      -9.388 -20.232 -45.004  1.00 48.70           N  
ATOM   1560  CA  ASP A 489      -9.021 -21.567 -44.463  1.00 46.07           C  
ATOM   1561  C   ASP A 489      -7.684 -21.525 -43.712  1.00 44.82           C  
ATOM   1562  O   ASP A 489      -7.649 -22.013 -42.567  1.00 48.62           O  
ATOM   1563  CB  ASP A 489      -9.064 -22.570 -45.611  1.00 49.79           C  
ATOM   1564  CG  ASP A 489     -10.362 -22.413 -46.390  1.00 56.00           C  
ATOM   1565  OD1 ASP A 489     -11.399 -22.818 -45.855  1.00 54.64           O  
ATOM   1566  OD2 ASP A 489     -10.340 -21.771 -47.461  1.00 61.25           O  
ATOM   1567  N   LEU A 490      -6.613 -21.000 -44.313  1.00 43.33           N  
ATOM   1568  CA  LEU A 490      -5.274 -21.045 -43.671  1.00 37.99           C  
ATOM   1569  C   LEU A 490      -5.264 -20.032 -42.524  1.00 34.00           C  
ATOM   1570  O   LEU A 490      -4.781 -20.370 -41.448  1.00 34.48           O  
ATOM   1571  CB  LEU A 490      -4.152 -20.769 -44.680  1.00 39.17           C  
ATOM   1572  CG  LEU A 490      -2.742 -20.927 -44.098  1.00 39.57           C  
ATOM   1573  CD1 LEU A 490      -2.465 -22.365 -43.671  1.00 40.85           C  
ATOM   1574  CD2 LEU A 490      -1.684 -20.465 -45.074  1.00 39.39           C  
ATOM   1575  N   LEU A 491      -5.839 -18.851 -42.726  1.00 35.70           N  
ATOM   1576  CA  LEU A 491      -5.986 -17.839 -41.647  1.00 34.21           C  
ATOM   1577  C   LEU A 491      -6.801 -18.455 -40.502  1.00 32.36           C  
ATOM   1578  O   LEU A 491      -6.319 -18.438 -39.340  1.00 28.69           O  
ATOM   1579  CB  LEU A 491      -6.667 -16.590 -42.208  1.00 33.39           C  
ATOM   1580  CG  LEU A 491      -6.861 -15.488 -41.173  1.00 32.48           C  
ATOM   1581  CD1 LEU A 491      -5.511 -14.982 -40.683  1.00 31.18           C  
ATOM   1582  CD2 LEU A 491      -7.709 -14.357 -41.731  1.00 32.77           C  
ATOM   1583  N   LEU A 492      -7.967 -19.009 -40.837  1.00 31.63           N  
ATOM   1584  CA  LEU A 492      -8.861 -19.739 -39.896  1.00 30.72           C  
ATOM   1585  C   LEU A 492      -8.070 -20.791 -39.121  1.00 31.31           C  
ATOM   1586  O   LEU A 492      -8.171 -20.805 -37.883  1.00 37.57           O  
ATOM   1587  CB  LEU A 492      -9.998 -20.408 -40.681  1.00 33.87           C  
ATOM   1588  N   GLU A 493      -7.366 -21.706 -39.794  1.00 29.92           N  
ATOM   1589  CA  GLU A 493      -6.655 -22.796 -39.066  1.00 28.86           C  
ATOM   1590  C   GLU A 493      -5.638 -22.133 -38.135  1.00 31.98           C  
ATOM   1591  O   GLU A 493      -5.576 -22.475 -36.940  1.00 32.91           O  
ATOM   1592  CB  GLU A 493      -6.026 -23.784 -40.044  1.00 28.60           C  
ATOM   1593  N   MET A 494      -4.921 -21.129 -38.652  1.00 34.97           N  
ATOM   1594  CA  MET A 494      -3.828 -20.453 -37.917  1.00 36.01           C  
ATOM   1595  C   MET A 494      -4.453 -19.775 -36.696  1.00 36.50           C  
ATOM   1596  O   MET A 494      -3.826 -19.837 -35.622  1.00 37.71           O  
ATOM   1597  CB  MET A 494      -3.071 -19.438 -38.795  1.00 36.68           C  
ATOM   1598  CG  MET A 494      -2.201 -20.045 -39.895  1.00 36.28           C  
ATOM   1599  SD  MET A 494      -1.070 -21.366 -39.346  1.00 47.12           S  
ATOM   1600  N   LEU A 495      -5.647 -19.181 -36.844  1.00 37.64           N  
ATOM   1601  CA  LEU A 495      -6.315 -18.463 -35.730  1.00 40.80           C  
ATOM   1602  C   LEU A 495      -6.812 -19.473 -34.703  1.00 43.23           C  
ATOM   1603  O   LEU A 495      -6.608 -19.229 -33.499  1.00 48.15           O  
ATOM   1604  CB  LEU A 495      -7.481 -17.608 -36.224  1.00 41.92           C  
ATOM   1605  CG  LEU A 495      -8.022 -16.641 -35.175  1.00 45.99           C  
ATOM   1606  N   ASN A 496      -7.460 -20.538 -35.177  1.00 42.96           N  
ATOM   1607  CA  ASN A 496      -8.001 -21.628 -34.326  1.00 47.18           C  
ATOM   1608  C   ASN A 496      -6.904 -22.157 -33.409  1.00 44.86           C  
ATOM   1609  O   ASN A 496      -7.184 -22.356 -32.204  1.00 42.49           O  
ATOM   1610  CB  ASN A 496      -8.589 -22.767 -35.154  1.00 46.02           C  
ATOM   1611  CG  ASN A 496      -9.931 -22.390 -35.717  1.00 48.41           C  
ATOM   1612  OD1 ASN A 496     -10.502 -21.379 -35.317  1.00 47.19           O  
ATOM   1613  ND2 ASN A 496     -10.429 -23.196 -36.635  1.00 53.27           N  
ATOM   1614  N   ALA A 497      -5.715 -22.397 -33.955  1.00 47.77           N  
ATOM   1615  CA  ALA A 497      -4.567 -22.900 -33.171  1.00 50.00           C  
ATOM   1616  C   ALA A 497      -4.550 -22.190 -31.820  1.00 54.56           C  
ATOM   1617  O   ALA A 497      -4.438 -22.889 -30.809  1.00 73.56           O  
ATOM   1618  CB  ALA A 497      -3.292 -22.681 -33.928  1.00 59.13           C  
ATOM   1619  N   HIS A 498      -4.707 -20.859 -31.806  1.00 55.35           N  
ATOM   1620  CA  HIS A 498      -4.776 -20.037 -30.569  1.00 53.37           C  
ATOM   1621  C   HIS A 498      -6.095 -20.356 -29.848  1.00 58.45           C  
ATOM   1622  O   HIS A 498      -6.825 -19.513 -29.330  1.00 57.95           O  
ATOM   1623  CB  HIS A 498      -4.544 -18.551 -30.894  1.00 55.87           C  
ATOM   1624  CG  HIS A 498      -3.096 -18.213 -31.088  1.00 60.91           C  
ATOM   1625  ND1 HIS A 498      -2.362 -17.472 -30.159  1.00 61.52           N  
ATOM   1626  CD2 HIS A 498      -2.226 -18.536 -32.075  1.00 55.83           C  
ATOM   1627  CE1 HIS A 498      -1.119 -17.338 -30.579  1.00 52.96           C  
ATOM   1628  NE2 HIS A 498      -1.008 -17.992 -31.750  1.00 55.61           N  
TER    1629      HIS A 498                                                      
ATOM   1630  N   LEU B 263      25.056   6.962 -11.564  1.00 45.43           N  
ATOM   1631  CA  LEU B 263      26.231   7.310 -12.386  1.00 44.64           C  
ATOM   1632  C   LEU B 263      26.770   6.033 -13.039  1.00 44.09           C  
ATOM   1633  O   LEU B 263      26.164   5.581 -14.035  1.00 51.94           O  
ATOM   1634  N   SER B 264      27.866   5.467 -12.521  1.00 37.68           N  
ATOM   1635  CA  SER B 264      28.607   4.363 -13.185  1.00 34.31           C  
ATOM   1636  C   SER B 264      27.720   3.108 -13.221  1.00 38.50           C  
ATOM   1637  O   SER B 264      26.876   2.917 -12.336  1.00 33.90           O  
ATOM   1638  CB  SER B 264      29.905   4.123 -12.481  1.00 35.33           C  
ATOM   1639  OG  SER B 264      29.694   3.500 -11.209  1.00 36.07           O  
ATOM   1640  N   PRO B 265      27.829   2.227 -14.252  1.00 36.69           N  
ATOM   1641  CA  PRO B 265      27.132   0.938 -14.237  1.00 36.73           C  
ATOM   1642  C   PRO B 265      27.173   0.216 -12.879  1.00 36.31           C  
ATOM   1643  O   PRO B 265      26.162  -0.334 -12.515  1.00 36.74           O  
ATOM   1644  CB  PRO B 265      27.843   0.090 -15.312  1.00 35.38           C  
ATOM   1645  CG  PRO B 265      28.682   1.064 -16.120  1.00 35.85           C  
ATOM   1646  CD  PRO B 265      28.527   2.452 -15.525  1.00 35.71           C  
ATOM   1647  N   GLU B 266      28.324   0.234 -12.187  1.00 36.69           N  
ATOM   1648  CA  GLU B 266      28.566  -0.530 -10.927  1.00 37.78           C  
ATOM   1649  C   GLU B 266      27.764   0.154  -9.820  1.00 38.67           C  
ATOM   1650  O   GLU B 266      27.114  -0.559  -9.051  1.00 35.33           O  
ATOM   1651  CB  GLU B 266      30.063  -0.627 -10.608  1.00 35.08           C  
ATOM   1652  CG  GLU B 266      30.414  -1.211  -9.243  1.00 33.91           C  
ATOM   1653  CD  GLU B 266      31.904  -1.516  -9.035  1.00 35.07           C  
ATOM   1654  N   GLN B 267      27.782   1.492  -9.800  1.00 38.00           N  
ATOM   1655  CA  GLN B 267      26.939   2.311  -8.899  1.00 34.79           C  
ATOM   1656  C   GLN B 267      25.466   1.981  -9.146  1.00 33.80           C  
ATOM   1657  O   GLN B 267      24.773   1.774  -8.141  1.00 36.96           O  
ATOM   1658  CB  GLN B 267      27.218   3.791  -9.088  1.00 38.66           C  
ATOM   1659  CG  GLN B 267      28.477   4.260  -8.376  1.00 42.37           C  
ATOM   1660  CD  GLN B 267      28.593   5.759  -8.482  1.00 42.96           C  
ATOM   1661  OE1 GLN B 267      28.232   6.353  -9.490  1.00 46.67           O  
ATOM   1662  NE2 GLN B 267      29.051   6.388  -7.416  1.00 52.06           N  
ATOM   1663  N   LEU B 268      25.011   1.888 -10.406  1.00 30.07           N  
ATOM   1664  CA  LEU B 268      23.585   1.589 -10.738  1.00 28.31           C  
ATOM   1665  C   LEU B 268      23.238   0.168 -10.268  1.00 27.35           C  
ATOM   1666  O   LEU B 268      22.244   0.005  -9.565  1.00 28.57           O  
ATOM   1667  CB  LEU B 268      23.350   1.797 -12.238  1.00 29.01           C  
ATOM   1668  CG  LEU B 268      22.008   1.333 -12.806  1.00 31.74           C  
ATOM   1669  CD1 LEU B 268      20.841   1.609 -11.878  1.00 36.74           C  
ATOM   1670  CD2 LEU B 268      21.739   1.985 -14.139  1.00 32.23           C  
ATOM   1671  N   VAL B 269      24.094  -0.820 -10.529  1.00 32.15           N  
ATOM   1672  CA  VAL B 269      23.907  -2.227 -10.060  1.00 29.98           C  
ATOM   1673  C   VAL B 269      23.774  -2.255  -8.530  1.00 31.58           C  
ATOM   1674  O   VAL B 269      22.893  -2.974  -8.038  1.00 29.97           O  
ATOM   1675  CB  VAL B 269      25.035  -3.139 -10.578  1.00 29.79           C  
ATOM   1676  CG1 VAL B 269      25.046  -4.519  -9.931  1.00 29.94           C  
ATOM   1677  CG2 VAL B 269      24.926  -3.284 -12.076  1.00 30.54           C  
ATOM   1678  N   LEU B 270      24.612  -1.517  -7.795  1.00 29.30           N  
ATOM   1679  CA  LEU B 270      24.600  -1.530  -6.309  1.00 29.10           C  
ATOM   1680  C   LEU B 270      23.361  -0.773  -5.799  1.00 29.95           C  
ATOM   1681  O   LEU B 270      22.762  -1.183  -4.801  1.00 29.32           O  
ATOM   1682  CB  LEU B 270      25.923  -0.971  -5.774  1.00 31.31           C  
ATOM   1683  CG  LEU B 270      27.054  -1.999  -5.589  1.00 30.86           C  
ATOM   1684  N   THR B 271      22.892   0.237  -6.516  1.00 30.49           N  
ATOM   1685  CA  THR B 271      21.582   0.857  -6.219  1.00 31.55           C  
ATOM   1686  C   THR B 271      20.465  -0.182  -6.424  1.00 33.13           C  
ATOM   1687  O   THR B 271      19.552  -0.237  -5.600  1.00 29.60           O  
ATOM   1688  CB  THR B 271      21.449   2.140  -7.032  1.00 32.70           C  
ATOM   1689  OG1 THR B 271      22.542   2.936  -6.567  1.00 34.07           O  
ATOM   1690  CG2 THR B 271      20.152   2.866  -6.795  1.00 36.28           C  
ATOM   1691  N   LEU B 272      20.533  -1.030  -7.449  1.00 32.84           N  
ATOM   1692  CA  LEU B 272      19.434  -2.012  -7.646  1.00 35.41           C  
ATOM   1693  C   LEU B 272      19.495  -3.037  -6.508  1.00 34.49           C  
ATOM   1694  O   LEU B 272      18.429  -3.393  -5.981  1.00 33.68           O  
ATOM   1695  CB  LEU B 272      19.546  -2.674  -9.018  1.00 33.56           C  
ATOM   1696  CG  LEU B 272      19.294  -1.760 -10.199  1.00 32.67           C  
ATOM   1697  CD1 LEU B 272      19.314  -2.577 -11.471  1.00 35.12           C  
ATOM   1698  CD2 LEU B 272      17.974  -1.030 -10.034  1.00 34.47           C  
ATOM   1699  N   LEU B 273      20.706  -3.429  -6.122  1.00 33.29           N  
ATOM   1700  CA  LEU B 273      20.935  -4.379  -5.013  1.00 35.50           C  
ATOM   1701  C   LEU B 273      20.309  -3.807  -3.751  1.00 35.47           C  
ATOM   1702  O   LEU B 273      19.610  -4.557  -3.093  1.00 40.57           O  
ATOM   1703  CB  LEU B 273      22.431  -4.635  -4.813  1.00 37.23           C  
ATOM   1704  CG  LEU B 273      22.808  -5.749  -3.833  1.00 38.94           C  
ATOM   1705  CD1 LEU B 273      21.795  -6.898  -3.810  1.00 39.70           C  
ATOM   1706  CD2 LEU B 273      24.185  -6.286  -4.166  1.00 45.63           C  
ATOM   1707  N   GLU B 274      20.541  -2.540  -3.420  1.00 40.52           N  
ATOM   1708  CA  GLU B 274      19.962  -1.967  -2.179  1.00 47.02           C  
ATOM   1709  C   GLU B 274      18.433  -1.934  -2.303  1.00 44.10           C  
ATOM   1710  O   GLU B 274      17.753  -2.173  -1.297  1.00 52.93           O  
ATOM   1711  CB  GLU B 274      20.522  -0.584  -1.869  1.00 56.91           C  
ATOM   1712  CG  GLU B 274      20.538  -0.286  -0.375  1.00 68.07           C  
ATOM   1713  CD  GLU B 274      19.360   0.506   0.182  1.00 79.20           C  
ATOM   1714  OE1 GLU B 274      19.146   1.633  -0.301  1.00 83.39           O  
ATOM   1715  OE2 GLU B 274      18.679   0.012   1.131  1.00 88.63           O  
ATOM   1716  N   ALA B 275      17.908  -1.694  -3.504  1.00 43.27           N  
ATOM   1717  CA  ALA B 275      16.464  -1.514  -3.757  1.00 38.82           C  
ATOM   1718  C   ALA B 275      15.709  -2.851  -3.665  1.00 34.42           C  
ATOM   1719  O   ALA B 275      14.487  -2.822  -3.634  1.00 36.15           O  
ATOM   1720  CB  ALA B 275      16.254  -0.858  -5.100  1.00 40.74           C  
ATOM   1721  N   GLU B 276      16.381  -3.993  -3.617  1.00 34.30           N  
ATOM   1722  CA  GLU B 276      15.660  -5.293  -3.621  1.00 36.22           C  
ATOM   1723  C   GLU B 276      14.594  -5.307  -2.530  1.00 39.83           C  
ATOM   1724  O   GLU B 276      14.879  -4.974  -1.391  1.00 42.47           O  
ATOM   1725  CB  GLU B 276      16.618  -6.461  -3.411  1.00 34.39           C  
ATOM   1726  CG  GLU B 276      17.125  -7.052  -4.690  1.00 35.03           C  
ATOM   1727  CD  GLU B 276      16.053  -7.658  -5.585  1.00 35.77           C  
ATOM   1728  OE1 GLU B 276      15.385  -6.890  -6.343  1.00 29.22           O  
ATOM   1729  OE2 GLU B 276      15.909  -8.896  -5.547  1.00 43.69           O  
ATOM   1730  N   PRO B 277      13.330  -5.701  -2.811  1.00 42.34           N  
ATOM   1731  CA  PRO B 277      12.352  -5.911  -1.740  1.00 38.85           C  
ATOM   1732  C   PRO B 277      12.747  -6.977  -0.715  1.00 36.43           C  
ATOM   1733  O   PRO B 277      13.399  -7.962  -1.052  1.00 33.33           O  
ATOM   1734  CB  PRO B 277      11.056  -6.352  -2.457  1.00 38.22           C  
ATOM   1735  CG  PRO B 277      11.452  -6.667  -3.888  1.00 38.27           C  
ATOM   1736  CD  PRO B 277      12.754  -5.923  -4.148  1.00 42.76           C  
ATOM   1737  N   PRO B 278      12.290  -6.832   0.553  1.00 40.56           N  
ATOM   1738  CA  PRO B 278      12.397  -7.894   1.560  1.00 38.73           C  
ATOM   1739  C   PRO B 278      11.500  -9.099   1.247  1.00 37.37           C  
ATOM   1740  O   PRO B 278      10.587  -8.924   0.506  1.00 38.94           O  
ATOM   1741  CB  PRO B 278      11.889  -7.221   2.838  1.00 37.67           C  
ATOM   1742  CG  PRO B 278      10.945  -6.153   2.338  1.00 40.44           C  
ATOM   1743  CD  PRO B 278      11.594  -5.635   1.070  1.00 39.61           C  
ATOM   1744  N   HIS B 279      11.818 -10.279   1.787  1.00 41.39           N  
ATOM   1745  CA  HIS B 279      10.964 -11.499   1.767  1.00 41.61           C  
ATOM   1746  C   HIS B 279       9.545 -11.125   2.218  1.00 41.05           C  
ATOM   1747  O   HIS B 279       9.395 -10.413   3.210  1.00 48.31           O  
ATOM   1748  N   VAL B 280       8.539 -11.483   1.440  1.00 42.69           N  
ATOM   1749  CA  VAL B 280       7.111 -11.384   1.847  1.00 43.88           C  
ATOM   1750  C   VAL B 280       6.738 -12.742   2.452  1.00 45.24           C  
ATOM   1751  O   VAL B 280       7.002 -13.768   1.804  1.00 46.76           O  
ATOM   1752  CB  VAL B 280       6.225 -11.002   0.654  1.00 43.30           C  
ATOM   1753  CG1 VAL B 280       4.788 -10.826   1.091  1.00 45.97           C  
ATOM   1754  CG2 VAL B 280       6.732  -9.751  -0.056  1.00 45.14           C  
ATOM   1755  N   LEU B 281       6.222 -12.750   3.678  1.00 47.52           N  
ATOM   1756  CA  LEU B 281       5.940 -14.000   4.427  1.00 50.11           C  
ATOM   1757  C   LEU B 281       4.445 -14.310   4.347  1.00 52.53           C  
ATOM   1758  O   LEU B 281       3.628 -13.444   4.708  1.00 55.10           O  
ATOM   1759  CB  LEU B 281       6.406 -13.837   5.873  1.00 50.77           C  
ATOM   1760  CG  LEU B 281       7.905 -13.603   6.020  1.00 53.42           C  
ATOM   1761  CD1 LEU B 281       8.298 -13.543   7.485  1.00 56.92           C  
ATOM   1762  CD2 LEU B 281       8.694 -14.688   5.292  1.00 58.42           C  
ATOM   1763  N   ILE B 282       4.130 -15.490   3.824  1.00 50.43           N  
ATOM   1764  CA  ILE B 282       2.756 -16.038   3.679  1.00 51.00           C  
ATOM   1765  C   ILE B 282       2.826 -17.486   4.159  1.00 53.27           C  
ATOM   1766  O   ILE B 282       3.731 -18.233   3.662  1.00 50.49           O  
ATOM   1767  CB  ILE B 282       2.276 -15.912   2.220  1.00 54.96           C  
ATOM   1768  CG1 ILE B 282       1.985 -14.460   1.831  1.00 60.01           C  
ATOM   1769  CG2 ILE B 282       1.078 -16.801   1.966  1.00 56.95           C  
ATOM   1770  CD1 ILE B 282       0.589 -13.962   2.185  1.00 63.11           C  
ATOM   1771  N   SER B 283       1.970 -17.833   5.131  1.00 54.55           N  
ATOM   1772  CA  SER B 283       1.751 -19.216   5.633  1.00 53.84           C  
ATOM   1773  C   SER B 283       1.138 -20.052   4.505  1.00 52.45           C  
ATOM   1774  O   SER B 283       0.258 -19.536   3.773  1.00 52.27           O  
ATOM   1775  N   ARG B 284       1.607 -21.284   4.342  1.00 49.29           N  
ATOM   1776  CA  ARG B 284       0.865 -22.339   3.608  1.00 52.45           C  
ATOM   1777  C   ARG B 284      -0.382 -22.711   4.407  1.00 51.75           C  
ATOM   1778  O   ARG B 284      -0.326 -22.881   5.620  1.00 45.05           O  
ATOM   1779  CB  ARG B 284       1.746 -23.574   3.423  1.00 56.53           C  
ATOM   1780  CG  ARG B 284       1.093 -24.700   2.636  1.00 60.31           C  
ATOM   1781  CD  ARG B 284       2.002 -25.909   2.642  1.00 62.33           C  
ATOM   1782  NE  ARG B 284       2.933 -25.977   1.520  1.00 62.57           N  
ATOM   1783  CZ  ARG B 284       2.758 -26.730   0.428  1.00 59.24           C  
ATOM   1784  NH1 ARG B 284       3.682 -26.743  -0.518  1.00 60.22           N  
ATOM   1785  NH2 ARG B 284       1.665 -27.459   0.272  1.00 51.48           N  
ATOM   1786  N   PRO B 285      -1.555 -22.875   3.760  1.00 58.36           N  
ATOM   1787  CA  PRO B 285      -2.726 -23.419   4.444  1.00 56.17           C  
ATOM   1788  C   PRO B 285      -2.346 -24.683   5.230  1.00 51.48           C  
ATOM   1789  O   PRO B 285      -1.602 -25.506   4.719  1.00 45.89           O  
ATOM   1790  CB  PRO B 285      -3.705 -23.751   3.302  1.00 55.61           C  
ATOM   1791  CG  PRO B 285      -3.317 -22.799   2.196  1.00 59.12           C  
ATOM   1792  CD  PRO B 285      -1.815 -22.604   2.337  1.00 59.05           C  
ATOM   1793  N   SER B 286      -2.863 -24.790   6.455  1.00 53.24           N  
ATOM   1794  CA  SER B 286      -2.822 -26.014   7.295  1.00 50.46           C  
ATOM   1795  C   SER B 286      -3.379 -27.210   6.511  1.00 43.56           C  
ATOM   1796  O   SER B 286      -2.733 -28.281   6.512  1.00 46.16           O  
ATOM   1797  CB  SER B 286      -3.570 -25.788   8.571  1.00 51.93           C  
ATOM   1798  OG  SER B 286      -2.783 -25.003   9.460  1.00 62.83           O  
ATOM   1799  N   ALA B 287      -4.511 -27.029   5.835  1.00 39.03           N  
ATOM   1800  CA  ALA B 287      -5.203 -28.104   5.093  1.00 42.20           C  
ATOM   1801  C   ALA B 287      -4.581 -28.234   3.706  1.00 48.04           C  
ATOM   1802  O   ALA B 287      -4.088 -27.250   3.149  1.00 48.76           O  
ATOM   1803  CB  ALA B 287      -6.685 -27.841   5.047  1.00 39.33           C  
ATOM   1804  N   PRO B 288      -4.567 -29.462   3.132  1.00 52.09           N  
ATOM   1805  CA  PRO B 288      -4.149 -29.668   1.749  1.00 52.58           C  
ATOM   1806  C   PRO B 288      -4.927 -28.706   0.837  1.00 51.80           C  
ATOM   1807  O   PRO B 288      -6.065 -28.481   1.185  1.00 47.73           O  
ATOM   1808  CB  PRO B 288      -4.527 -31.124   1.433  1.00 53.00           C  
ATOM   1809  CG  PRO B 288      -4.802 -31.798   2.764  1.00 51.51           C  
ATOM   1810  CD  PRO B 288      -4.991 -30.705   3.788  1.00 51.58           C  
ATOM   1811  N   PHE B 289      -4.316 -28.204  -0.261  1.00 52.15           N  
ATOM   1812  CA  PHE B 289      -4.786 -27.044  -1.081  1.00 49.63           C  
ATOM   1813  C   PHE B 289      -6.090 -27.381  -1.811  1.00 48.42           C  
ATOM   1814  O   PHE B 289      -6.218 -28.501  -2.308  1.00 46.21           O  
ATOM   1815  CB  PHE B 289      -3.767 -26.623  -2.145  1.00 52.26           C  
ATOM   1816  CG  PHE B 289      -2.707 -25.653  -1.682  1.00 52.67           C  
ATOM   1817  CD1 PHE B 289      -3.044 -24.360  -1.313  1.00 54.05           C  
ATOM   1818  CD2 PHE B 289      -1.370 -26.032  -1.614  1.00 51.95           C  
ATOM   1819  CE1 PHE B 289      -2.071 -23.476  -0.869  1.00 55.30           C  
ATOM   1820  CE2 PHE B 289      -0.401 -25.149  -1.161  1.00 52.58           C  
ATOM   1821  CZ  PHE B 289      -0.754 -23.873  -0.786  1.00 52.80           C  
ATOM   1822  N   THR B 290      -7.017 -26.424  -1.858  1.00 45.06           N  
ATOM   1823  CA  THR B 290      -8.240 -26.435  -2.702  1.00 43.49           C  
ATOM   1824  C   THR B 290      -8.097 -25.327  -3.751  1.00 43.45           C  
ATOM   1825  O   THR B 290      -7.162 -24.512  -3.605  1.00 39.79           O  
ATOM   1826  CB  THR B 290      -9.490 -26.254  -1.831  1.00 41.74           C  
ATOM   1827  OG1 THR B 290      -9.469 -24.953  -1.241  1.00 38.10           O  
ATOM   1828  CG2 THR B 290      -9.585 -27.302  -0.744  1.00 41.66           C  
ATOM   1829  N   GLU B 291      -8.971 -25.284  -4.761  1.00 45.21           N  
ATOM   1830  CA  GLU B 291      -8.951 -24.193  -5.771  1.00 52.39           C  
ATOM   1831  C   GLU B 291      -8.900 -22.869  -4.995  1.00 54.12           C  
ATOM   1832  O   GLU B 291      -8.055 -22.015  -5.333  1.00 57.57           O  
ATOM   1833  CB  GLU B 291     -10.129 -24.285  -6.748  1.00 48.85           C  
ATOM   1834  N   ALA B 292      -9.678 -22.765  -3.919  1.00 49.94           N  
ATOM   1835  CA  ALA B 292      -9.860 -21.526  -3.131  1.00 48.97           C  
ATOM   1836  C   ALA B 292      -8.614 -21.245  -2.300  1.00 49.21           C  
ATOM   1837  O   ALA B 292      -8.078 -20.136  -2.401  1.00 55.88           O  
ATOM   1838  CB  ALA B 292     -11.073 -21.637  -2.239  1.00 48.17           C  
ATOM   1839  N   SER B 293      -8.181 -22.200  -1.483  1.00 45.96           N  
ATOM   1840  CA  SER B 293      -7.072 -21.967  -0.533  1.00 43.13           C  
ATOM   1841  C   SER B 293      -5.862 -21.462  -1.342  1.00 40.73           C  
ATOM   1842  O   SER B 293      -5.255 -20.440  -0.944  1.00 39.12           O  
ATOM   1843  CB  SER B 293      -6.772 -23.208   0.294  1.00 42.51           C  
ATOM   1844  OG  SER B 293      -6.530 -24.336  -0.543  1.00 47.62           O  
ATOM   1845  N   MET B 294      -5.557 -22.129  -2.454  1.00 37.00           N  
ATOM   1846  CA  MET B 294      -4.395 -21.808  -3.318  1.00 39.93           C  
ATOM   1847  C   MET B 294      -4.633 -20.465  -4.004  1.00 39.94           C  
ATOM   1848  O   MET B 294      -3.708 -19.640  -4.019  1.00 36.88           O  
ATOM   1849  CB  MET B 294      -4.150 -22.865  -4.392  1.00 39.69           C  
ATOM   1850  CG  MET B 294      -3.104 -22.435  -5.396  1.00 47.41           C  
ATOM   1851  SD  MET B 294      -2.300 -23.826  -6.195  1.00 58.06           S  
ATOM   1852  CE  MET B 294      -1.215 -24.386  -4.886  1.00 53.61           C  
ATOM   1853  N   MET B 295      -5.815 -20.232  -4.563  1.00 37.21           N  
ATOM   1854  CA  MET B 295      -6.081 -18.906  -5.173  1.00 40.89           C  
ATOM   1855  C   MET B 295      -5.962 -17.801  -4.104  1.00 42.94           C  
ATOM   1856  O   MET B 295      -5.359 -16.735  -4.414  1.00 40.87           O  
ATOM   1857  CB  MET B 295      -7.426 -18.885  -5.909  1.00 39.53           C  
ATOM   1858  CG  MET B 295      -7.375 -19.716  -7.197  1.00 39.52           C  
ATOM   1859  SD  MET B 295      -6.152 -19.097  -8.432  1.00 45.75           S  
ATOM   1860  CE  MET B 295      -6.503 -17.341  -8.339  1.00 50.29           C  
ATOM   1861  N   MET B 296      -6.405 -18.038  -2.869  1.00 41.12           N  
ATOM   1862  CA  MET B 296      -6.335 -16.997  -1.804  1.00 46.98           C  
ATOM   1863  C   MET B 296      -4.864 -16.781  -1.404  1.00 45.55           C  
ATOM   1864  O   MET B 296      -4.498 -15.623  -1.103  1.00 38.85           O  
ATOM   1865  CB  MET B 296      -7.178 -17.369  -0.574  1.00 51.91           C  
ATOM   1866  CG  MET B 296      -7.227 -16.282   0.501  1.00 63.74           C  
ATOM   1867  SD  MET B 296      -6.077 -16.519   1.923  1.00 82.23           S  
ATOM   1868  CE  MET B 296      -6.803 -17.950   2.727  1.00 76.55           C  
ATOM   1869  N   SER B 297      -4.061 -17.850  -1.389  1.00 41.86           N  
ATOM   1870  CA  SER B 297      -2.604 -17.809  -1.084  1.00 46.32           C  
ATOM   1871  C   SER B 297      -1.872 -16.942  -2.123  1.00 43.60           C  
ATOM   1872  O   SER B 297      -1.074 -16.071  -1.709  1.00 37.89           O  
ATOM   1873  CB  SER B 297      -1.984 -19.195  -1.044  1.00 46.92           C  
ATOM   1874  OG  SER B 297      -2.568 -20.009  -0.035  1.00 47.77           O  
ATOM   1875  N   LEU B 298      -2.151 -17.182  -3.409  1.00 37.48           N  
ATOM   1876  CA  LEU B 298      -1.392 -16.616  -4.547  1.00 36.02           C  
ATOM   1877  C   LEU B 298      -1.799 -15.163  -4.723  1.00 35.96           C  
ATOM   1878  O   LEU B 298      -0.921 -14.363  -5.101  1.00 31.24           O  
ATOM   1879  CB  LEU B 298      -1.662 -17.410  -5.823  1.00 36.43           C  
ATOM   1880  CG  LEU B 298      -1.163 -18.852  -5.817  1.00 39.58           C  
ATOM   1881  CD1 LEU B 298      -1.391 -19.526  -7.163  1.00 41.50           C  
ATOM   1882  CD2 LEU B 298       0.310 -18.938  -5.433  1.00 40.66           C  
ATOM   1883  N   THR B 299      -3.064 -14.848  -4.443  1.00 33.43           N  
ATOM   1884  CA  THR B 299      -3.589 -13.469  -4.575  1.00 36.38           C  
ATOM   1885  C   THR B 299      -3.152 -12.633  -3.369  1.00 37.95           C  
ATOM   1886  O   THR B 299      -2.820 -11.450  -3.565  1.00 36.46           O  
ATOM   1887  CB  THR B 299      -5.103 -13.438  -4.770  1.00 36.49           C  
ATOM   1888  OG1 THR B 299      -5.734 -14.353  -3.873  1.00 42.21           O  
ATOM   1889  CG2 THR B 299      -5.484 -13.746  -6.198  1.00 37.30           C  
ATOM   1890  N   LYS B 300      -3.116 -13.219  -2.176  1.00 41.49           N  
ATOM   1891  CA  LYS B 300      -2.699 -12.481  -0.960  1.00 42.74           C  
ATOM   1892  C   LYS B 300      -1.216 -12.121  -1.140  1.00 35.75           C  
ATOM   1893  O   LYS B 300      -0.872 -10.952  -0.973  1.00 34.98           O  
ATOM   1894  CB  LYS B 300      -3.039 -13.275   0.308  1.00 49.84           C  
ATOM   1895  CG  LYS B 300      -2.830 -12.498   1.610  1.00 60.76           C  
ATOM   1896  CD  LYS B 300      -2.889 -13.318   2.901  1.00 66.70           C  
ATOM   1897  CE  LYS B 300      -4.272 -13.368   3.530  1.00 70.01           C  
ATOM   1898  NZ  LYS B 300      -4.243 -13.946   4.896  1.00 66.45           N  
ATOM   1899  N   LEU B 301      -0.388 -13.087  -1.538  1.00 38.29           N  
ATOM   1900  CA  LEU B 301       1.059 -12.875  -1.847  1.00 34.34           C  
ATOM   1901  C   LEU B 301       1.243 -11.759  -2.883  1.00 31.16           C  
ATOM   1902  O   LEU B 301       2.103 -10.882  -2.656  1.00 33.09           O  
ATOM   1903  CB  LEU B 301       1.702 -14.166  -2.359  1.00 32.97           C  
ATOM   1904  CG  LEU B 301       3.136 -13.974  -2.865  1.00 36.15           C  
ATOM   1905  CD1 LEU B 301       4.053 -13.469  -1.748  1.00 37.53           C  
ATOM   1906  CD2 LEU B 301       3.704 -15.244  -3.466  1.00 35.54           C  
ATOM   1907  N   ALA B 302       0.482 -11.805  -3.984  1.00 30.43           N  
ATOM   1908  CA  ALA B 302       0.635 -10.894  -5.133  1.00 27.74           C  
ATOM   1909  C   ALA B 302       0.370  -9.472  -4.633  1.00 30.59           C  
ATOM   1910  O   ALA B 302       1.135  -8.537  -4.947  1.00 31.72           O  
ATOM   1911  CB  ALA B 302      -0.268 -11.320  -6.268  1.00 26.39           C  
ATOM   1912  N   ASP B 303      -0.665  -9.309  -3.822  1.00 33.37           N  
ATOM   1913  CA  ASP B 303      -1.125  -7.970  -3.380  1.00 33.80           C  
ATOM   1914  C   ASP B 303      -0.049  -7.385  -2.447  1.00 35.48           C  
ATOM   1915  O   ASP B 303       0.240  -6.183  -2.586  1.00 33.06           O  
ATOM   1916  CB  ASP B 303      -2.519  -8.094  -2.751  1.00 38.37           C  
ATOM   1917  CG  ASP B 303      -3.089  -6.787  -2.238  1.00 39.66           C  
ATOM   1918  OD1 ASP B 303      -3.638  -5.999  -3.056  1.00 49.10           O  
ATOM   1919  OD2 ASP B 303      -2.972  -6.561  -1.030  1.00 44.58           O  
ATOM   1920  N   LYS B 304       0.519  -8.190  -1.531  1.00 34.96           N  
ATOM   1921  CA  LYS B 304       1.629  -7.762  -0.638  1.00 36.32           C  
ATOM   1922  C   LYS B 304       2.867  -7.404  -1.484  1.00 39.54           C  
ATOM   1923  O   LYS B 304       3.420  -6.322  -1.290  1.00 36.11           O  
ATOM   1924  CB  LYS B 304       1.969  -8.880   0.341  1.00 42.55           C  
ATOM   1925  CG  LYS B 304       0.902  -9.175   1.377  1.00 53.65           C  
ATOM   1926  CD  LYS B 304       1.449  -9.734   2.679  1.00 60.46           C  
ATOM   1927  CE  LYS B 304       0.483  -9.572   3.838  1.00 63.96           C  
ATOM   1928  NZ  LYS B 304      -0.657 -10.513   3.719  1.00 70.62           N  
ATOM   1929  N   GLU B 305       3.288  -8.285  -2.402  1.00 35.77           N  
ATOM   1930  CA  GLU B 305       4.436  -8.022  -3.315  1.00 36.29           C  
ATOM   1931  C   GLU B 305       4.185  -6.728  -4.098  1.00 33.94           C  
ATOM   1932  O   GLU B 305       5.137  -5.927  -4.271  1.00 36.42           O  
ATOM   1933  CB  GLU B 305       4.668  -9.179  -4.282  1.00 36.32           C  
ATOM   1934  CG  GLU B 305       5.097 -10.476  -3.601  1.00 38.36           C  
ATOM   1935  CD  GLU B 305       5.577 -11.532  -4.587  1.00 41.91           C  
ATOM   1936  OE1 GLU B 305       6.768 -11.491  -4.925  1.00 48.42           O  
ATOM   1937  OE2 GLU B 305       4.747 -12.345  -5.084  1.00 40.80           O  
ATOM   1938  N   LEU B 306       2.963  -6.500  -4.558  1.00 30.35           N  
ATOM   1939  CA  LEU B 306       2.685  -5.277  -5.357  1.00 30.01           C  
ATOM   1940  C   LEU B 306       3.054  -4.025  -4.539  1.00 30.37           C  
ATOM   1941  O   LEU B 306       3.730  -3.142  -5.088  1.00 32.23           O  
ATOM   1942  CB  LEU B 306       1.239  -5.258  -5.839  1.00 27.73           C  
ATOM   1943  CG  LEU B 306       0.941  -6.122  -7.072  1.00 30.64           C  
ATOM   1944  CD1 LEU B 306      -0.549  -6.150  -7.359  1.00 29.74           C  
ATOM   1945  CD2 LEU B 306       1.682  -5.625  -8.303  1.00 30.77           C  
ATOM   1946  N   VAL B 307       2.707  -3.980  -3.258  1.00 30.25           N  
ATOM   1947  CA  VAL B 307       3.104  -2.867  -2.353  1.00 32.60           C  
ATOM   1948  C   VAL B 307       4.626  -2.717  -2.424  1.00 31.15           C  
ATOM   1949  O   VAL B 307       5.108  -1.579  -2.568  1.00 33.45           O  
ATOM   1950  CB  VAL B 307       2.620  -3.107  -0.904  1.00 33.67           C  
ATOM   1951  CG1 VAL B 307       3.067  -1.994   0.034  1.00 29.64           C  
ATOM   1952  CG2 VAL B 307       1.101  -3.291  -0.846  1.00 32.22           C  
ATOM   1953  N   HIS B 308       5.367  -3.812  -2.269  1.00 31.79           N  
ATOM   1954  CA  HIS B 308       6.854  -3.753  -2.193  1.00 34.21           C  
ATOM   1955  C   HIS B 308       7.414  -3.429  -3.586  1.00 32.48           C  
ATOM   1956  O   HIS B 308       8.467  -2.766  -3.646  1.00 30.09           O  
ATOM   1957  CB  HIS B 308       7.447  -5.025  -1.578  1.00 37.35           C  
ATOM   1958  CG  HIS B 308       7.282  -5.108  -0.098  1.00 40.73           C  
ATOM   1959  ND1 HIS B 308       7.889  -4.216   0.766  1.00 49.49           N  
ATOM   1960  CD2 HIS B 308       6.602  -5.980   0.677  1.00 43.16           C  
ATOM   1961  CE1 HIS B 308       7.586  -4.536   2.007  1.00 50.88           C  
ATOM   1962  NE2 HIS B 308       6.797  -5.612   1.978  1.00 44.08           N  
ATOM   1963  N   MET B 309       6.721  -3.844  -4.659  1.00 32.23           N  
ATOM   1964  CA  MET B 309       7.137  -3.516  -6.047  1.00 30.30           C  
ATOM   1965  C   MET B 309       7.101  -1.991  -6.243  1.00 32.32           C  
ATOM   1966  O   MET B 309       8.070  -1.419  -6.847  1.00 32.32           O  
ATOM   1967  CB  MET B 309       6.230  -4.179  -7.078  1.00 28.42           C  
ATOM   1968  CG  MET B 309       6.705  -3.981  -8.501  1.00 26.99           C  
ATOM   1969  SD  MET B 309       5.617  -4.747  -9.716  1.00 32.85           S  
ATOM   1970  CE  MET B 309       5.439  -6.410  -9.076  1.00 30.35           C  
ATOM   1971  N   ILE B 310       6.048  -1.324  -5.780  1.00 30.17           N  
ATOM   1972  CA  ILE B 310       5.934   0.149  -5.996  1.00 32.65           C  
ATOM   1973  C   ILE B 310       7.122   0.789  -5.274  1.00 33.15           C  
ATOM   1974  O   ILE B 310       7.831   1.620  -5.857  1.00 34.44           O  
ATOM   1975  CB  ILE B 310       4.568   0.675  -5.515  1.00 33.94           C  
ATOM   1976  CG1 ILE B 310       3.404   0.048  -6.297  1.00 29.45           C  
ATOM   1977  CG2 ILE B 310       4.554   2.192  -5.521  1.00 29.28           C  
ATOM   1978  N   SER B 311       7.381   0.352  -4.047  1.00 35.80           N  
ATOM   1979  CA  SER B 311       8.540   0.824  -3.252  1.00 33.99           C  
ATOM   1980  C   SER B 311       9.851   0.563  -4.019  1.00 32.35           C  
ATOM   1981  O   SER B 311      10.673   1.506  -4.172  1.00 29.30           O  
ATOM   1982  CB  SER B 311       8.530   0.195  -1.903  1.00 33.39           C  
ATOM   1983  OG  SER B 311       9.354   0.954  -1.046  1.00 37.97           O  
ATOM   1984  N   TRP B 312      10.012  -0.641  -4.576  1.00 30.44           N  
ATOM   1985  CA  TRP B 312      11.226  -0.999  -5.353  1.00 29.25           C  
ATOM   1986  C   TRP B 312      11.417  -0.037  -6.534  1.00 31.33           C  
ATOM   1987  O   TRP B 312      12.535   0.432  -6.729  1.00 32.42           O  
ATOM   1988  CB  TRP B 312      11.165  -2.464  -5.774  1.00 27.71           C  
ATOM   1989  CG  TRP B 312      12.068  -2.839  -6.899  1.00 26.80           C  
ATOM   1990  CD1 TRP B 312      13.395  -3.138  -6.835  1.00 29.25           C  
ATOM   1991  CD2 TRP B 312      11.681  -3.013  -8.278  1.00 28.32           C  
ATOM   1992  NE1 TRP B 312      13.869  -3.475  -8.078  1.00 29.10           N  
ATOM   1993  CE2 TRP B 312      12.839  -3.416  -8.983  1.00 27.39           C  
ATOM   1994  CE3 TRP B 312      10.470  -2.904  -8.974  1.00 24.52           C  
ATOM   1995  CZ2 TRP B 312      12.816  -3.693 -10.344  1.00 25.35           C  
ATOM   1996  CZ3 TRP B 312      10.450  -3.176 -10.315  1.00 24.83           C  
ATOM   1997  CH2 TRP B 312      11.613  -3.557 -10.996  1.00 26.23           C  
ATOM   1998  N   ALA B 313      10.362   0.254  -7.300  1.00 30.59           N  
ATOM   1999  CA  ALA B 313      10.459   1.048  -8.538  1.00 26.03           C  
ATOM   2000  C   ALA B 313      10.953   2.459  -8.200  1.00 27.25           C  
ATOM   2001  O   ALA B 313      11.822   3.002  -8.913  1.00 25.69           O  
ATOM   2002  CB  ALA B 313       9.133   1.044  -9.245  1.00 26.04           C  
ATOM   2003  N   LYS B 314      10.389   3.064  -7.168  1.00 31.17           N  
ATOM   2004  CA  LYS B 314      10.776   4.430  -6.717  1.00 36.41           C  
ATOM   2005  C   LYS B 314      12.242   4.499  -6.252  1.00 39.74           C  
ATOM   2006  O   LYS B 314      12.738   5.624  -6.142  1.00 43.89           O  
ATOM   2007  CB  LYS B 314       9.920   4.838  -5.521  1.00 38.09           C  
ATOM   2008  CG  LYS B 314       8.433   4.941  -5.795  1.00 41.10           C  
ATOM   2009  CD  LYS B 314       7.624   5.162  -4.535  1.00 43.20           C  
ATOM   2010  CE  LYS B 314       7.576   6.604  -4.111  1.00 47.45           C  
ATOM   2011  NZ  LYS B 314       6.444   6.813  -3.176  1.00 60.60           N  
ATOM   2012  N   LYS B 315      12.894   3.371  -5.929  1.00 36.00           N  
ATOM   2013  CA  LYS B 315      14.303   3.348  -5.470  1.00 36.54           C  
ATOM   2014  C   LYS B 315      15.222   3.106  -6.684  1.00 41.23           C  
ATOM   2015  O   LYS B 315      16.431   3.176  -6.501  1.00 40.04           O  
ATOM   2016  CB  LYS B 315      14.474   2.322  -4.340  1.00 37.05           C  
ATOM   2017  CG  LYS B 315      13.737   2.664  -3.041  1.00 41.02           C  
ATOM   2018  CD  LYS B 315      13.928   1.675  -1.881  1.00 38.58           C  
ATOM   2019  N   ILE B 316      14.675   2.845  -7.883  1.00 39.13           N  
ATOM   2020  CA  ILE B 316      15.441   2.813  -9.163  1.00 34.88           C  
ATOM   2021  C   ILE B 316      15.781   4.253  -9.550  1.00 36.73           C  
ATOM   2022  O   ILE B 316      14.898   5.066  -9.747  1.00 36.41           O  
ATOM   2023  CB  ILE B 316      14.659   2.127 -10.294  1.00 33.95           C  
ATOM   2024  CG1 ILE B 316      14.291   0.678  -9.964  1.00 35.71           C  
ATOM   2025  CG2 ILE B 316      15.435   2.214 -11.595  1.00 34.34           C  
ATOM   2026  CD1 ILE B 316      13.254   0.084 -10.891  1.00 34.34           C  
ATOM   2027  N   PRO B 317      17.066   4.602  -9.759  1.00 39.48           N  
ATOM   2028  CA  PRO B 317      17.458   6.003  -9.969  1.00 37.17           C  
ATOM   2029  C   PRO B 317      16.834   6.568 -11.244  1.00 34.64           C  
ATOM   2030  O   PRO B 317      16.991   5.947 -12.275  1.00 39.45           O  
ATOM   2031  CB  PRO B 317      18.982   5.946 -10.166  1.00 37.15           C  
ATOM   2032  CG  PRO B 317      19.395   4.578  -9.625  1.00 37.99           C  
ATOM   2033  CD  PRO B 317      18.202   3.675  -9.868  1.00 36.75           C  
ATOM   2034  N   GLY B 318      16.117   7.681 -11.146  1.00 35.31           N  
ATOM   2035  CA  GLY B 318      15.507   8.362 -12.307  1.00 33.88           C  
ATOM   2036  C   GLY B 318      14.043   8.012 -12.530  1.00 31.87           C  
ATOM   2037  O   GLY B 318      13.375   8.730 -13.270  1.00 35.65           O  
ATOM   2038  N   PHE B 319      13.535   6.941 -11.925  1.00 33.56           N  
ATOM   2039  CA  PHE B 319      12.138   6.482 -12.093  1.00 31.09           C  
ATOM   2040  C   PHE B 319      11.156   7.566 -11.631  1.00 30.79           C  
ATOM   2041  O   PHE B 319      10.181   7.879 -12.338  1.00 34.20           O  
ATOM   2042  CB  PHE B 319      11.891   5.215 -11.277  1.00 30.45           C  
ATOM   2043  CG  PHE B 319      10.496   4.679 -11.437  1.00 28.87           C  
ATOM   2044  CD1 PHE B 319      10.113   4.072 -12.617  1.00 26.83           C  
ATOM   2045  CD2 PHE B 319       9.551   4.874 -10.440  1.00 29.29           C  
ATOM   2046  CE1 PHE B 319       8.836   3.571 -12.752  1.00 31.56           C  
ATOM   2047  CE2 PHE B 319       8.280   4.360 -10.576  1.00 29.07           C  
ATOM   2048  CZ  PHE B 319       7.912   3.733 -11.741  1.00 29.21           C  
ATOM   2049  N   VAL B 320      11.401   8.119 -10.455  1.00 31.91           N  
ATOM   2050  CA  VAL B 320      10.488   9.094  -9.801  1.00 35.07           C  
ATOM   2051  C   VAL B 320      10.601  10.445 -10.513  1.00 33.94           C  
ATOM   2052  O   VAL B 320       9.825  11.319 -10.169  1.00 32.56           O  
ATOM   2053  CB  VAL B 320      10.785   9.228  -8.302  1.00 35.72           C  
ATOM   2054  CG1 VAL B 320      10.675   7.891  -7.595  1.00 37.26           C  
ATOM   2055  CG2 VAL B 320      12.126   9.894  -8.044  1.00 36.31           C  
ATOM   2056  N   GLU B 321      11.504  10.589 -11.483  1.00 36.33           N  
ATOM   2057  CA  GLU B 321      11.662  11.845 -12.265  1.00 39.89           C  
ATOM   2058  C   GLU B 321      10.810  11.777 -13.533  1.00 39.66           C  
ATOM   2059  O   GLU B 321      10.531  12.829 -14.117  1.00 39.02           O  
ATOM   2060  CB  GLU B 321      13.131  12.091 -12.583  1.00 45.43           C  
ATOM   2061  CG  GLU B 321      13.954  12.516 -11.382  1.00 50.53           C  
ATOM   2062  CD  GLU B 321      15.443  12.464 -11.692  1.00 64.57           C  
ATOM   2063  OE1 GLU B 321      15.786  12.081 -12.835  1.00 64.62           O  
ATOM   2064  OE2 GLU B 321      16.260  12.799 -10.802  1.00 79.06           O  
ATOM   2065  N   LEU B 322      10.368  10.581 -13.909  1.00 39.68           N  
ATOM   2066  CA  LEU B 322       9.333  10.365 -14.953  1.00 38.57           C  
ATOM   2067  C   LEU B 322       8.037  11.065 -14.526  1.00 35.61           C  
ATOM   2068  O   LEU B 322       7.875  11.365 -13.340  1.00 37.00           O  
ATOM   2069  CB  LEU B 322       9.138   8.856 -15.148  1.00 40.46           C  
ATOM   2070  CG  LEU B 322      10.424   8.084 -15.457  1.00 39.86           C  
ATOM   2071  CD1 LEU B 322      10.154   6.619 -15.770  1.00 35.09           C  
ATOM   2072  CD2 LEU B 322      11.161   8.759 -16.602  1.00 42.24           C  
ATOM   2073  N   SER B 323       7.192  11.381 -15.498  1.00 37.74           N  
ATOM   2074  CA  SER B 323       5.759  11.733 -15.345  1.00 37.81           C  
ATOM   2075  C   SER B 323       5.063  10.654 -14.494  1.00 40.62           C  
ATOM   2076  O   SER B 323       5.322   9.434 -14.746  1.00 43.99           O  
ATOM   2077  CB  SER B 323       5.155  11.849 -16.732  1.00 39.59           C  
ATOM   2078  OG  SER B 323       3.742  11.706 -16.721  1.00 47.72           O  
ATOM   2079  N   LEU B 324       4.224  11.067 -13.535  1.00 35.98           N  
ATOM   2080  CA  LEU B 324       3.365  10.187 -12.704  1.00 33.66           C  
ATOM   2081  C   LEU B 324       2.733   9.127 -13.605  1.00 34.75           C  
ATOM   2082  O   LEU B 324       2.828   7.920 -13.279  1.00 34.21           O  
ATOM   2083  CB  LEU B 324       2.295  11.016 -11.963  1.00 37.14           C  
ATOM   2084  CG  LEU B 324       1.417  10.269 -10.945  1.00 32.10           C  
ATOM   2085  N   PHE B 325       2.143   9.567 -14.713  1.00 36.83           N  
ATOM   2086  CA  PHE B 325       1.372   8.733 -15.670  1.00 36.42           C  
ATOM   2087  C   PHE B 325       2.287   7.686 -16.323  1.00 35.46           C  
ATOM   2088  O   PHE B 325       1.831   6.540 -16.523  1.00 36.42           O  
ATOM   2089  CB  PHE B 325       0.669   9.656 -16.658  1.00 39.38           C  
ATOM   2090  CG  PHE B 325      -0.171  10.697 -15.954  1.00 45.02           C  
ATOM   2091  CD1 PHE B 325      -1.364  10.344 -15.336  1.00 46.43           C  
ATOM   2092  CD2 PHE B 325       0.259  12.011 -15.849  1.00 45.42           C  
ATOM   2093  CE1 PHE B 325      -2.128  11.288 -14.664  1.00 50.58           C  
ATOM   2094  CE2 PHE B 325      -0.498  12.950 -15.168  1.00 47.25           C  
ATOM   2095  CZ  PHE B 325      -1.685  12.589 -14.574  1.00 49.51           C  
ATOM   2096  N   ASP B 326       3.539   8.045 -16.599  1.00 32.81           N  
ATOM   2097  CA  ASP B 326       4.561   7.097 -17.106  1.00 38.16           C  
ATOM   2098  C   ASP B 326       4.874   6.063 -16.007  1.00 33.12           C  
ATOM   2099  O   ASP B 326       4.753   4.857 -16.289  1.00 28.36           O  
ATOM   2100  CB  ASP B 326       5.782   7.841 -17.670  1.00 37.09           C  
ATOM   2101  CG  ASP B 326       5.582   8.350 -19.097  1.00 38.54           C  
ATOM   2102  OD1 ASP B 326       4.564   8.034 -19.717  1.00 34.12           O  
ATOM   2103  OD2 ASP B 326       6.452   9.091 -19.574  1.00 49.35           O  
ATOM   2104  N   GLN B 327       5.206   6.511 -14.794  1.00 32.98           N  
ATOM   2105  CA  GLN B 327       5.363   5.606 -13.624  1.00 34.28           C  
ATOM   2106  C   GLN B 327       4.163   4.646 -13.547  1.00 32.72           C  
ATOM   2107  O   GLN B 327       4.351   3.433 -13.429  1.00 35.46           O  
ATOM   2108  CB  GLN B 327       5.459   6.364 -12.301  1.00 34.10           C  
ATOM   2109  CG  GLN B 327       6.523   7.443 -12.298  1.00 41.57           C  
ATOM   2110  CD  GLN B 327       6.744   8.035 -10.928  1.00 39.97           C  
ATOM   2111  OE1 GLN B 327       6.607   7.347  -9.917  1.00 43.68           O  
ATOM   2112  NE2 GLN B 327       7.127   9.300 -10.896  1.00 36.69           N  
ATOM   2113  N   VAL B 328       2.955   5.175 -13.554  1.00 32.11           N  
ATOM   2114  CA  VAL B 328       1.731   4.351 -13.402  1.00 32.63           C  
ATOM   2115  C   VAL B 328       1.684   3.316 -14.519  1.00 34.81           C  
ATOM   2116  O   VAL B 328       1.479   2.096 -14.193  1.00 32.61           O  
ATOM   2117  CB  VAL B 328       0.483   5.230 -13.405  1.00 33.97           C  
ATOM   2118  CG1 VAL B 328      -0.753   4.414 -13.774  1.00 34.69           C  
ATOM   2119  CG2 VAL B 328       0.337   5.933 -12.060  1.00 35.34           C  
ATOM   2120  N   ARG B 329       1.863   3.786 -15.759  1.00 32.91           N  
ATOM   2121  CA  ARG B 329       1.761   2.967 -17.000  1.00 36.56           C  
ATOM   2122  C   ARG B 329       2.802   1.812 -16.962  1.00 32.29           C  
ATOM   2123  O   ARG B 329       2.444   0.663 -17.309  1.00 27.77           O  
ATOM   2124  CB  ARG B 329       1.923   3.895 -18.197  1.00 40.52           C  
ATOM   2125  CG  ARG B 329       1.611   3.229 -19.525  1.00 53.62           C  
ATOM   2126  CD  ARG B 329       2.060   4.041 -20.737  1.00 65.16           C  
ATOM   2127  NE  ARG B 329       3.369   3.621 -21.249  1.00 71.22           N  
ATOM   2128  CZ  ARG B 329       4.525   4.248 -21.039  1.00 67.43           C  
ATOM   2129  NH1 ARG B 329       4.577   5.361 -20.321  1.00 63.75           N  
ATOM   2130  NH2 ARG B 329       5.631   3.757 -21.570  1.00 66.67           N  
ATOM   2131  N   LEU B 330       4.017   2.077 -16.483  1.00 28.45           N  
ATOM   2132  CA  LEU B 330       5.087   1.041 -16.353  1.00 29.70           C  
ATOM   2133  C   LEU B 330       4.672  -0.016 -15.336  1.00 27.60           C  
ATOM   2134  O   LEU B 330       4.790  -1.204 -15.634  1.00 23.94           O  
ATOM   2135  CB  LEU B 330       6.408   1.719 -15.985  1.00 28.09           C  
ATOM   2136  CG  LEU B 330       6.953   2.611 -17.091  1.00 28.63           C  
ATOM   2137  CD1 LEU B 330       8.158   3.411 -16.636  1.00 33.40           C  
ATOM   2138  CD2 LEU B 330       7.291   1.795 -18.324  1.00 32.52           C  
ATOM   2139  N   LEU B 331       4.113   0.390 -14.197  1.00 30.05           N  
ATOM   2140  CA  LEU B 331       3.795  -0.586 -13.129  1.00 28.75           C  
ATOM   2141  C   LEU B 331       2.566  -1.384 -13.555  1.00 29.13           C  
ATOM   2142  O   LEU B 331       2.598  -2.617 -13.422  1.00 30.27           O  
ATOM   2143  CB  LEU B 331       3.682   0.155 -11.797  1.00 30.22           C  
ATOM   2144  CG  LEU B 331       5.056   0.514 -11.224  1.00 29.66           C  
ATOM   2145  CD1 LEU B 331       4.986   1.614 -10.188  1.00 31.40           C  
ATOM   2146  CD2 LEU B 331       5.734  -0.694 -10.628  1.00 29.86           C  
ATOM   2147  N   GLU B 332       1.601  -0.723 -14.191  1.00 31.52           N  
ATOM   2148  CA  GLU B 332       0.331  -1.337 -14.649  1.00 31.96           C  
ATOM   2149  C   GLU B 332       0.632  -2.367 -15.732  1.00 29.98           C  
ATOM   2150  O   GLU B 332       0.150  -3.502 -15.634  1.00 31.38           O  
ATOM   2151  CB  GLU B 332      -0.608  -0.266 -15.194  1.00 35.42           C  
ATOM   2152  CG  GLU B 332      -1.350   0.494 -14.109  1.00 35.49           C  
ATOM   2153  CD  GLU B 332      -2.398   1.468 -14.634  1.00 40.40           C  
ATOM   2154  OE1 GLU B 332      -2.350   1.859 -15.841  1.00 43.78           O  
ATOM   2155  OE2 GLU B 332      -3.255   1.858 -13.821  1.00 51.52           O  
ATOM   2156  N   SER B 333       1.446  -1.967 -16.694  1.00 26.56           N  
ATOM   2157  CA  SER B 333       1.889  -2.771 -17.844  1.00 27.13           C  
ATOM   2158  C   SER B 333       2.795  -3.967 -17.475  1.00 28.45           C  
ATOM   2159  O   SER B 333       2.662  -4.974 -18.156  1.00 31.77           O  
ATOM   2160  CB  SER B 333       2.539  -1.877 -18.796  1.00 32.23           C  
ATOM   2161  OG  SER B 333       3.048  -2.640 -19.851  1.00 42.89           O  
ATOM   2162  N   SER B 334       3.687  -3.896 -16.477  1.00 27.04           N  
ATOM   2163  CA  SER B 334       4.767  -4.904 -16.247  1.00 27.19           C  
ATOM   2164  C   SER B 334       4.592  -5.712 -14.962  1.00 26.87           C  
ATOM   2165  O   SER B 334       5.351  -6.669 -14.767  1.00 29.12           O  
ATOM   2166  CB  SER B 334       6.103  -4.207 -16.215  1.00 28.17           C  
ATOM   2167  OG  SER B 334       6.312  -3.617 -14.950  1.00 29.60           O  
ATOM   2168  N   TRP B 335       3.666  -5.346 -14.076  1.00 30.83           N  
ATOM   2169  CA  TRP B 335       3.650  -5.873 -12.685  1.00 29.07           C  
ATOM   2170  C   TRP B 335       3.679  -7.403 -12.648  1.00 27.71           C  
ATOM   2171  O   TRP B 335       4.419  -7.963 -11.791  1.00 23.37           O  
ATOM   2172  CB  TRP B 335       2.489  -5.316 -11.879  1.00 29.66           C  
ATOM   2173  CG  TRP B 335       1.124  -5.800 -12.250  1.00 32.07           C  
ATOM   2174  CD1 TRP B 335       0.212  -5.154 -13.030  1.00 32.51           C  
ATOM   2175  CD2 TRP B 335       0.471  -6.986 -11.770  1.00 30.30           C  
ATOM   2176  NE1 TRP B 335      -0.968  -5.848 -13.062  1.00 32.10           N  
ATOM   2177  CE2 TRP B 335      -0.839  -6.979 -12.301  1.00 32.65           C  
ATOM   2178  CE3 TRP B 335       0.850  -8.038 -10.929  1.00 31.42           C  
ATOM   2179  CZ2 TRP B 335      -1.761  -7.991 -12.026  1.00 31.75           C  
ATOM   2180  CZ3 TRP B 335      -0.061  -9.035 -10.656  1.00 30.67           C  
ATOM   2181  CH2 TRP B 335      -1.346  -9.011 -11.201  1.00 30.70           C  
ATOM   2182  N   MET B 336       2.895  -8.074 -13.488  1.00 27.13           N  
ATOM   2183  CA  MET B 336       2.822  -9.557 -13.415  1.00 27.64           C  
ATOM   2184  C   MET B 336       4.154 -10.144 -13.894  1.00 28.34           C  
ATOM   2185  O   MET B 336       4.632 -11.116 -13.277  1.00 26.67           O  
ATOM   2186  CB  MET B 336       1.651 -10.095 -14.246  1.00 29.80           C  
ATOM   2187  CG  MET B 336       1.572 -11.597 -14.293  1.00 35.88           C  
ATOM   2188  SD  MET B 336       1.193 -12.397 -12.698  1.00 38.04           S  
ATOM   2189  CE  MET B 336      -0.579 -12.159 -12.684  1.00 41.85           C  
ATOM   2190  N   GLU B 337       4.745  -9.579 -14.950  1.00 28.39           N  
ATOM   2191  CA  GLU B 337       6.053 -10.044 -15.480  1.00 30.89           C  
ATOM   2192  C   GLU B 337       7.099  -9.827 -14.396  1.00 28.91           C  
ATOM   2193  O   GLU B 337       7.952 -10.703 -14.223  1.00 23.33           O  
ATOM   2194  CB  GLU B 337       6.459  -9.289 -16.738  1.00 36.40           C  
ATOM   2195  CG  GLU B 337       5.365  -9.289 -17.785  1.00 44.50           C  
ATOM   2196  CD  GLU B 337       5.751  -8.484 -19.002  1.00 54.73           C  
ATOM   2197  OE1 GLU B 337       4.843  -7.877 -19.635  1.00 59.09           O  
ATOM   2198  OE2 GLU B 337       6.974  -8.461 -19.292  1.00 55.47           O  
ATOM   2199  N   VAL B 338       7.000  -8.714 -13.662  1.00 26.39           N  
ATOM   2200  CA  VAL B 338       7.965  -8.466 -12.565  1.00 25.93           C  
ATOM   2201  C   VAL B 338       7.770  -9.483 -11.453  1.00 25.43           C  
ATOM   2202  O   VAL B 338       8.796  -9.914 -10.931  1.00 27.65           O  
ATOM   2203  CB  VAL B 338       7.940  -7.043 -12.010  1.00 24.70           C  
ATOM   2204  CG1 VAL B 338       8.865  -6.954 -10.810  1.00 25.47           C  
ATOM   2205  CG2 VAL B 338       8.366  -6.033 -13.068  1.00 25.47           C  
ATOM   2206  N   LEU B 339       6.543  -9.778 -11.034  1.00 25.32           N  
ATOM   2207  CA  LEU B 339       6.327 -10.811  -9.989  1.00 24.95           C  
ATOM   2208  C   LEU B 339       6.941 -12.118 -10.482  1.00 26.71           C  
ATOM   2209  O   LEU B 339       7.676 -12.791  -9.715  1.00 28.37           O  
ATOM   2210  CB  LEU B 339       4.845 -10.978  -9.683  1.00 26.68           C  
ATOM   2211  CG  LEU B 339       4.177  -9.788  -8.984  1.00 29.86           C  
ATOM   2212  CD1 LEU B 339       2.757 -10.161  -8.577  1.00 31.95           C  
ATOM   2213  CD2 LEU B 339       4.973  -9.341  -7.754  1.00 32.27           C  
ATOM   2214  N   MET B 340       6.691 -12.452 -11.725  1.00 26.09           N  
ATOM   2215  CA  MET B 340       7.079 -13.769 -12.264  1.00 29.91           C  
ATOM   2216  C   MET B 340       8.599 -13.891 -12.429  1.00 30.42           C  
ATOM   2217  O   MET B 340       9.121 -15.015 -12.283  1.00 26.83           O  
ATOM   2218  CB  MET B 340       6.367 -14.034 -13.580  1.00 30.97           C  
ATOM   2219  CG  MET B 340       5.089 -14.768 -13.324  1.00 30.02           C  
ATOM   2220  SD  MET B 340       4.073 -14.992 -14.801  1.00 35.83           S  
ATOM   2221  CE  MET B 340       2.636 -15.721 -14.013  1.00 34.12           C  
ATOM   2222  N   MET B 341       9.286 -12.799 -12.740  1.00 32.60           N  
ATOM   2223  CA  MET B 341      10.771 -12.771 -12.768  1.00 31.74           C  
ATOM   2224  C   MET B 341      11.289 -12.977 -11.338  1.00 32.54           C  
ATOM   2225  O   MET B 341      12.239 -13.792 -11.154  1.00 34.36           O  
ATOM   2226  CB  MET B 341      11.281 -11.457 -13.367  1.00 34.47           C  
ATOM   2227  CG  MET B 341      12.739 -11.479 -13.723  1.00 37.92           C  
ATOM   2228  SD  MET B 341      13.144 -12.626 -15.048  1.00 37.49           S  
ATOM   2229  CE  MET B 341      14.400 -13.614 -14.238  1.00 36.82           C  
ATOM   2230  N   GLY B 342      10.664 -12.336 -10.352  1.00 30.96           N  
ATOM   2231  CA  GLY B 342      10.948 -12.567  -8.917  1.00 32.96           C  
ATOM   2232  C   GLY B 342      10.833 -14.041  -8.533  1.00 36.25           C  
ATOM   2233  O   GLY B 342      11.748 -14.596  -7.879  1.00 38.76           O  
ATOM   2234  N   LEU B 343       9.747 -14.683  -8.925  1.00 37.37           N  
ATOM   2235  CA  LEU B 343       9.466 -16.104  -8.601  1.00 36.14           C  
ATOM   2236  C   LEU B 343      10.543 -17.006  -9.240  1.00 35.89           C  
ATOM   2237  O   LEU B 343      11.056 -17.908  -8.545  1.00 33.04           O  
ATOM   2238  CB  LEU B 343       8.043 -16.419  -9.087  1.00 34.80           C  
ATOM   2239  CG  LEU B 343       7.656 -17.899  -9.130  1.00 37.84           C  
ATOM   2240  CD1 LEU B 343       7.491 -18.461  -7.721  1.00 37.54           C  
ATOM   2241  CD2 LEU B 343       6.387 -18.098  -9.953  1.00 36.34           C  
ATOM   2242  N   MET B 344      10.894 -16.790 -10.513  1.00 37.92           N  
ATOM   2243  CA  MET B 344      11.838 -17.686 -11.229  1.00 37.13           C  
ATOM   2244  C   MET B 344      13.199 -17.634 -10.536  1.00 40.06           C  
ATOM   2245  O   MET B 344      13.751 -18.708 -10.273  1.00 43.99           O  
ATOM   2246  CB  MET B 344      11.959 -17.320 -12.700  1.00 41.04           C  
ATOM   2247  CG  MET B 344      10.681 -17.646 -13.452  1.00 43.94           C  
ATOM   2248  SD  MET B 344      10.758 -17.042 -15.129  1.00 51.23           S  
ATOM   2249  CE  MET B 344       9.150 -17.514 -15.764  1.00 47.01           C  
ATOM   2250  N   TRP B 345      13.649 -16.444 -10.126  1.00 38.60           N  
ATOM   2251  CA  TRP B 345      14.917 -16.236  -9.375  1.00 36.98           C  
ATOM   2252  C   TRP B 345      14.893 -16.973  -8.018  1.00 39.70           C  
ATOM   2253  O   TRP B 345      15.785 -17.794  -7.810  1.00 41.73           O  
ATOM   2254  CB  TRP B 345      15.178 -14.736  -9.233  1.00 34.18           C  
ATOM   2255  CG  TRP B 345      16.454 -14.389  -8.545  1.00 35.86           C  
ATOM   2256  CD1 TRP B 345      16.568 -13.669  -7.397  1.00 36.28           C  
ATOM   2257  CD2 TRP B 345      17.792 -14.755  -8.931  1.00 34.84           C  
ATOM   2258  NE1 TRP B 345      17.881 -13.559  -7.042  1.00 38.73           N  
ATOM   2259  CE2 TRP B 345      18.658 -14.216  -7.960  1.00 37.42           C  
ATOM   2260  CE3 TRP B 345      18.344 -15.494  -9.980  1.00 36.96           C  
ATOM   2261  CZ2 TRP B 345      20.046 -14.369  -8.020  1.00 38.04           C  
ATOM   2262  CZ3 TRP B 345      19.709 -15.656 -10.038  1.00 38.49           C  
ATOM   2263  CH2 TRP B 345      20.551 -15.098  -9.073  1.00 40.75           C  
ATOM   2264  N   ARG B 346      13.934 -16.673  -7.123  1.00 36.84           N  
ATOM   2265  CA  ARG B 346      13.721 -17.406  -5.851  1.00 31.82           C  
ATOM   2266  C   ARG B 346      13.637 -18.919  -6.085  1.00 34.50           C  
ATOM   2267  O   ARG B 346      13.915 -19.662  -5.125  1.00 35.61           O  
ATOM   2268  CB  ARG B 346      12.415 -17.014  -5.170  1.00 29.99           C  
ATOM   2269  CG  ARG B 346      12.388 -15.600  -4.634  1.00 30.76           C  
ATOM   2270  CD  ARG B 346      11.158 -15.291  -3.803  1.00 31.69           C  
ATOM   2271  NE  ARG B 346       9.836 -15.535  -4.410  1.00 34.50           N  
ATOM   2272  CZ  ARG B 346       9.121 -14.663  -5.129  1.00 35.38           C  
ATOM   2273  NH1 ARG B 346       9.606 -13.468  -5.420  1.00 34.35           N  
ATOM   2274  NH2 ARG B 346       7.914 -14.991  -5.567  1.00 33.40           N  
ATOM   2275  N   SER B 347      13.212 -19.367  -7.270  1.00 38.67           N  
ATOM   2276  CA  SER B 347      12.984 -20.801  -7.610  1.00 35.70           C  
ATOM   2277  C   SER B 347      14.229 -21.454  -8.253  1.00 42.38           C  
ATOM   2278  O   SER B 347      14.166 -22.669  -8.488  1.00 36.30           O  
ATOM   2279  CB  SER B 347      11.806 -20.939  -8.529  1.00 32.59           C  
ATOM   2280  OG  SER B 347      10.594 -20.627  -7.865  1.00 32.94           O  
ATOM   2281  N   ILE B 348      15.306 -20.697  -8.543  1.00 44.04           N  
ATOM   2282  CA  ILE B 348      16.412 -21.103  -9.474  1.00 45.26           C  
ATOM   2283  C   ILE B 348      17.263 -22.203  -8.815  1.00 49.91           C  
ATOM   2284  O   ILE B 348      17.659 -23.137  -9.523  1.00 50.92           O  
ATOM   2285  CB  ILE B 348      17.255 -19.876  -9.909  1.00 40.39           C  
ATOM   2286  CG1 ILE B 348      17.821 -20.014 -11.330  1.00 37.24           C  
ATOM   2287  CG2 ILE B 348      18.343 -19.547  -8.887  1.00 39.70           C  
ATOM   2288  N   ASP B 349      17.472 -22.114  -7.498  1.00 57.42           N  
ATOM   2289  CA  ASP B 349      18.333 -23.013  -6.682  1.00 64.11           C  
ATOM   2290  C   ASP B 349      17.557 -24.267  -6.241  1.00 70.09           C  
ATOM   2291  O   ASP B 349      18.153 -25.101  -5.534  1.00 90.91           O  
ATOM   2292  CB  ASP B 349      18.847 -22.265  -5.445  1.00 64.60           C  
ATOM   2293  CG  ASP B 349      19.804 -21.126  -5.765  1.00 71.06           C  
ATOM   2294  OD1 ASP B 349      20.731 -21.354  -6.585  1.00 74.53           O  
ATOM   2295  OD2 ASP B 349      19.613 -20.010  -5.203  1.00 66.03           O  
ATOM   2296  N   HIS B 350      16.279 -24.398  -6.606  1.00 63.77           N  
ATOM   2297  CA  HIS B 350      15.381 -25.484  -6.137  1.00 51.31           C  
ATOM   2298  C   HIS B 350      14.614 -26.043  -7.325  1.00 48.72           C  
ATOM   2299  O   HIS B 350      13.428 -25.782  -7.469  1.00 57.96           O  
ATOM   2300  CB  HIS B 350      14.425 -24.956  -5.066  1.00 55.57           C  
ATOM   2301  CG  HIS B 350      15.057 -24.330  -3.864  1.00 58.76           C  
ATOM   2302  ND1 HIS B 350      15.124 -22.957  -3.696  1.00 56.95           N  
ATOM   2303  CD2 HIS B 350      15.573 -24.870  -2.736  1.00 60.39           C  
ATOM   2304  CE1 HIS B 350      15.696 -22.683  -2.536  1.00 53.88           C  
ATOM   2305  NE2 HIS B 350      15.984 -23.834  -1.931  1.00 60.04           N  
ATOM   2306  N   PRO B 351      15.259 -26.825  -8.219  1.00 55.61           N  
ATOM   2307  CA  PRO B 351      14.585 -27.438  -9.370  1.00 53.93           C  
ATOM   2308  C   PRO B 351      13.318 -28.256  -9.063  1.00 57.02           C  
ATOM   2309  O   PRO B 351      13.327 -29.015  -8.100  1.00 56.42           O  
ATOM   2310  CB  PRO B 351      15.628 -28.425  -9.930  1.00 55.19           C  
ATOM   2311  CG  PRO B 351      16.960 -27.884  -9.466  1.00 55.93           C  
ATOM   2312  CD  PRO B 351      16.694 -27.151  -8.168  1.00 57.66           C  
ATOM   2313  N   GLY B 352      12.291 -28.122  -9.918  1.00 59.52           N  
ATOM   2314  CA  GLY B 352      10.980 -28.792  -9.797  1.00 51.61           C  
ATOM   2315  C   GLY B 352      10.024 -28.055  -8.859  1.00 53.52           C  
ATOM   2316  O   GLY B 352       8.807 -28.217  -9.038  1.00 57.69           O  
ATOM   2317  N   LYS B 353      10.536 -27.283  -7.888  1.00 51.05           N  
ATOM   2318  CA  LYS B 353       9.732 -26.479  -6.927  1.00 50.05           C  
ATOM   2319  C   LYS B 353       9.452 -25.086  -7.509  1.00 48.52           C  
ATOM   2320  O   LYS B 353      10.242 -24.600  -8.362  1.00 53.57           O  
ATOM   2321  CB  LYS B 353      10.465 -26.250  -5.598  1.00 50.46           C  
ATOM   2322  CG  LYS B 353      11.137 -27.454  -4.965  1.00 50.47           C  
ATOM   2323  CD  LYS B 353      10.162 -28.488  -4.516  1.00 54.99           C  
ATOM   2324  CE  LYS B 353      10.783 -29.515  -3.596  1.00 57.03           C  
ATOM   2325  NZ  LYS B 353       9.888 -30.684  -3.441  1.00 61.98           N  
ATOM   2326  N   LEU B 354       8.410 -24.428  -7.012  1.00 42.42           N  
ATOM   2327  CA  LEU B 354       8.188 -22.989  -7.268  1.00 39.51           C  
ATOM   2328  C   LEU B 354       8.155 -22.313  -5.916  1.00 42.62           C  
ATOM   2329  O   LEU B 354       7.224 -22.649  -5.108  1.00 45.55           O  
ATOM   2330  CB  LEU B 354       6.877 -22.779  -8.022  1.00 39.08           C  
ATOM   2331  CG  LEU B 354       6.965 -22.981  -9.528  1.00 41.96           C  
ATOM   2332  CD1 LEU B 354       5.580 -22.869 -10.142  1.00 46.00           C  
ATOM   2333  CD2 LEU B 354       7.923 -21.978 -10.179  1.00 40.11           C  
ATOM   2334  N   ILE B 355       9.092 -21.387  -5.688  1.00 39.01           N  
ATOM   2335  CA  ILE B 355       9.306 -20.798  -4.338  1.00 38.49           C  
ATOM   2336  C   ILE B 355       8.560 -19.465  -4.276  1.00 41.02           C  
ATOM   2337  O   ILE B 355       9.168 -18.397  -4.428  1.00 43.45           O  
ATOM   2338  CB  ILE B 355      10.804 -20.745  -3.994  1.00 37.70           C  
ATOM   2339  CG1 ILE B 355      11.369 -22.170  -3.876  1.00 40.01           C  
ATOM   2340  CG2 ILE B 355      11.057 -19.925  -2.733  1.00 35.65           C  
ATOM   2341  N   PHE B 356       7.250 -19.539  -4.069  1.00 43.08           N  
ATOM   2342  CA  PHE B 356       6.357 -18.348  -4.075  1.00 46.98           C  
ATOM   2343  C   PHE B 356       6.712 -17.433  -2.900  1.00 43.65           C  
ATOM   2344  O   PHE B 356       6.743 -16.205  -3.057  1.00 44.14           O  
ATOM   2345  CB  PHE B 356       4.897 -18.793  -4.084  1.00 44.09           C  
ATOM   2346  CG  PHE B 356       4.400 -19.188  -5.451  1.00 42.24           C  
ATOM   2347  CD1 PHE B 356       4.009 -18.220  -6.364  1.00 38.71           C  
ATOM   2348  CD2 PHE B 356       4.303 -20.525  -5.806  1.00 43.32           C  
ATOM   2349  CE1 PHE B 356       3.525 -18.584  -7.609  1.00 40.12           C  
ATOM   2350  CE2 PHE B 356       3.810 -20.888  -7.049  1.00 43.90           C  
ATOM   2351  CZ  PHE B 356       3.437 -19.917  -7.956  1.00 42.92           C  
ATOM   2352  N   ALA B 357       6.948 -18.023  -1.734  1.00 42.71           N  
ATOM   2353  CA  ALA B 357       7.477 -17.323  -0.546  1.00 44.15           C  
ATOM   2354  C   ALA B 357       8.276 -18.354   0.228  1.00 46.85           C  
ATOM   2355  O   ALA B 357       8.091 -19.543  -0.029  1.00 41.30           O  
ATOM   2356  CB  ALA B 357       6.350 -16.721   0.270  1.00 44.88           C  
ATOM   2357  N   PRO B 358       9.143 -17.923   1.180  1.00 53.08           N  
ATOM   2358  CA  PRO B 358       9.878 -18.844   2.052  1.00 50.89           C  
ATOM   2359  C   PRO B 358       9.026 -20.019   2.556  1.00 50.64           C  
ATOM   2360  O   PRO B 358       9.478 -21.122   2.446  1.00 50.24           O  
ATOM   2361  CB  PRO B 358      10.314 -17.949   3.217  1.00 53.96           C  
ATOM   2362  CG  PRO B 358      10.512 -16.583   2.567  1.00 57.80           C  
ATOM   2363  CD  PRO B 358       9.453 -16.510   1.479  1.00 54.98           C  
ATOM   2364  N   ASP B 359       7.800 -19.778   3.024  1.00 54.00           N  
ATOM   2365  CA  ASP B 359       6.949 -20.865   3.574  1.00 59.20           C  
ATOM   2366  C   ASP B 359       5.791 -21.191   2.623  1.00 62.89           C  
ATOM   2367  O   ASP B 359       4.758 -21.669   3.109  1.00 62.60           O  
ATOM   2368  CB  ASP B 359       6.461 -20.525   4.982  1.00 68.65           C  
ATOM   2369  CG  ASP B 359       6.029 -21.753   5.769  1.00 79.11           C  
ATOM   2370  OD1 ASP B 359       6.870 -22.682   5.945  1.00 74.12           O  
ATOM   2371  OD2 ASP B 359       4.845 -21.787   6.180  1.00 91.18           O  
ATOM   2372  N   LEU B 360       5.965 -21.002   1.315  1.00 64.56           N  
ATOM   2373  CA  LEU B 360       4.943 -21.388   0.308  1.00 62.44           C  
ATOM   2374  C   LEU B 360       5.649 -21.965  -0.918  1.00 62.99           C  
ATOM   2375  O   LEU B 360       5.867 -21.232  -1.899  1.00 62.48           O  
ATOM   2376  CB  LEU B 360       4.101 -20.162  -0.037  1.00 65.37           C  
ATOM   2377  CG  LEU B 360       2.997 -20.403  -1.062  1.00 73.36           C  
ATOM   2378  CD1 LEU B 360       2.199 -21.660  -0.739  1.00 72.87           C  
ATOM   2379  CD2 LEU B 360       2.085 -19.191  -1.144  1.00 78.39           C  
ATOM   2380  N   VAL B 361       6.002 -23.245  -0.845  1.00 57.41           N  
ATOM   2381  CA  VAL B 361       6.938 -23.896  -1.801  1.00 58.91           C  
ATOM   2382  C   VAL B 361       6.141 -24.950  -2.565  1.00 59.37           C  
ATOM   2383  O   VAL B 361       5.965 -26.052  -2.046  1.00 64.83           O  
ATOM   2384  CB  VAL B 361       8.141 -24.467  -1.027  1.00 59.41           C  
ATOM   2385  CG1 VAL B 361       9.125 -25.211  -1.920  1.00 59.43           C  
ATOM   2386  CG2 VAL B 361       8.839 -23.366  -0.246  1.00 56.19           C  
ATOM   2387  N   LEU B 362       5.620 -24.585  -3.731  1.00 61.58           N  
ATOM   2388  CA  LEU B 362       4.618 -25.398  -4.456  1.00 62.33           C  
ATOM   2389  C   LEU B 362       5.348 -26.298  -5.461  1.00 65.10           C  
ATOM   2390  O   LEU B 362       6.339 -25.835  -6.093  1.00 56.01           O  
ATOM   2391  CB  LEU B 362       3.589 -24.469  -5.111  1.00 65.78           C  
ATOM   2392  N   ASP B 363       4.923 -27.568  -5.518  1.00 71.80           N  
ATOM   2393  CA  ASP B 363       5.355 -28.587  -6.515  1.00 68.56           C  
ATOM   2394  C   ASP B 363       4.550 -28.321  -7.788  1.00 69.88           C  
ATOM   2395  O   ASP B 363       3.472 -27.696  -7.695  1.00 70.08           O  
ATOM   2396  CB  ASP B 363       5.141 -30.031  -6.024  1.00 68.45           C  
ATOM   2397  CG  ASP B 363       6.330 -30.717  -5.353  1.00 72.52           C  
ATOM   2398  OD1 ASP B 363       7.024 -30.075  -4.528  1.00 66.23           O  
ATOM   2399  OD2 ASP B 363       6.540 -31.911  -5.642  1.00 82.18           O  
ATOM   2400  N   ARG B 364       5.066 -28.765  -8.931  1.00 67.76           N  
ATOM   2401  CA  ARG B 364       4.355 -28.745 -10.234  1.00 67.45           C  
ATOM   2402  C   ARG B 364       2.972 -29.388 -10.065  1.00 67.66           C  
ATOM   2403  O   ARG B 364       1.984 -28.776 -10.506  1.00 72.29           O  
ATOM   2404  CB  ARG B 364       5.204 -29.463 -11.287  1.00 64.70           C  
ATOM   2405  CG  ARG B 364       4.651 -29.374 -12.699  1.00 66.05           C  
ATOM   2406  CD  ARG B 364       3.885 -30.621 -13.080  1.00 69.21           C  
ATOM   2407  NE  ARG B 364       3.191 -30.376 -14.332  1.00 76.17           N  
ATOM   2408  CZ  ARG B 364       2.770 -31.308 -15.179  1.00 73.31           C  
ATOM   2409  NH1 ARG B 364       2.162 -30.942 -16.295  1.00 65.75           N  
ATOM   2410  NH2 ARG B 364       2.961 -32.591 -14.921  1.00 75.61           N  
ATOM   2411  N   ASP B 365       2.907 -30.556  -9.419  1.00 66.36           N  
ATOM   2412  CA  ASP B 365       1.691 -31.409  -9.344  1.00 68.70           C  
ATOM   2413  C   ASP B 365       0.631 -30.721  -8.463  1.00 68.51           C  
ATOM   2414  O   ASP B 365      -0.561 -30.953  -8.717  1.00 74.47           O  
ATOM   2415  CB  ASP B 365       2.045 -32.835  -8.892  1.00 68.60           C  
ATOM   2416  N   GLU B 366       1.033 -29.879  -7.499  1.00 64.69           N  
ATOM   2417  CA  GLU B 366       0.117 -29.120  -6.594  1.00 62.59           C  
ATOM   2418  C   GLU B 366      -0.659 -28.009  -7.324  1.00 59.30           C  
ATOM   2419  O   GLU B 366      -1.434 -27.310  -6.648  1.00 62.17           O  
ATOM   2420  CB  GLU B 366       0.898 -28.450  -5.467  1.00 65.60           C  
ATOM   2421  CG  GLU B 366       1.382 -29.417  -4.415  1.00 68.40           C  
ATOM   2422  CD  GLU B 366       1.318 -28.798  -3.036  1.00 74.34           C  
ATOM   2423  OE1 GLU B 366       2.132 -27.887  -2.770  1.00 82.58           O  
ATOM   2424  OE2 GLU B 366       0.419 -29.188  -2.257  1.00 75.84           O  
ATOM   2425  N   GLY B 367      -0.433 -27.815  -8.626  1.00 56.65           N  
ATOM   2426  CA  GLY B 367      -1.219 -26.909  -9.478  1.00 56.54           C  
ATOM   2427  C   GLY B 367      -2.525 -27.546  -9.923  1.00 57.05           C  
ATOM   2428  O   GLY B 367      -3.393 -26.808 -10.429  1.00 62.45           O  
ATOM   2429  N   LYS B 368      -2.658 -28.868  -9.761  1.00 63.73           N  
ATOM   2430  CA  LYS B 368      -3.915 -29.643  -9.981  1.00 65.13           C  
ATOM   2431  C   LYS B 368      -5.101 -28.927  -9.335  1.00 60.57           C  
ATOM   2432  O   LYS B 368      -6.189 -28.948  -9.948  1.00 57.59           O  
ATOM   2433  CB  LYS B 368      -3.829 -31.045  -9.374  1.00 73.05           C  
ATOM   2434  CG  LYS B 368      -3.447 -32.146 -10.349  1.00 79.01           C  
ATOM   2435  CD  LYS B 368      -4.541 -32.470 -11.349  1.00 82.59           C  
ATOM   2436  CE  LYS B 368      -4.192 -33.636 -12.249  1.00 85.92           C  
ATOM   2437  NZ  LYS B 368      -2.791 -33.566 -12.741  1.00 82.59           N  
ATOM   2438  N   SER B 369      -4.872 -28.318  -8.165  1.00 57.60           N  
ATOM   2439  CA  SER B 369      -5.899 -27.720  -7.273  1.00 57.92           C  
ATOM   2440  C   SER B 369      -6.614 -26.517  -7.920  1.00 59.63           C  
ATOM   2441  O   SER B 369      -7.731 -26.179  -7.432  1.00 55.66           O  
ATOM   2442  CB  SER B 369      -5.300 -27.376  -5.916  1.00 59.87           C  
ATOM   2443  OG  SER B 369      -4.245 -26.422  -6.008  1.00 62.29           O  
ATOM   2444  N   VAL B 370      -6.047 -25.880  -8.960  1.00 55.87           N  
ATOM   2445  CA  VAL B 370      -6.741 -24.767  -9.689  1.00 54.24           C  
ATOM   2446  C   VAL B 370      -6.797 -25.106 -11.182  1.00 47.70           C  
ATOM   2447  O   VAL B 370      -5.753 -25.357 -11.769  1.00 41.99           O  
ATOM   2448  CB  VAL B 370      -6.100 -23.388  -9.431  1.00 55.11           C  
ATOM   2449  N   GLU B 371      -7.993 -25.136 -11.767  1.00 48.15           N  
ATOM   2450  CA  GLU B 371      -8.160 -25.415 -13.214  1.00 57.11           C  
ATOM   2451  C   GLU B 371      -7.339 -24.386 -14.013  1.00 52.51           C  
ATOM   2452  O   GLU B 371      -7.613 -23.178 -13.874  1.00 55.43           O  
ATOM   2453  CB  GLU B 371      -9.635 -25.380 -13.628  1.00 60.23           C  
ATOM   2454  CG  GLU B 371      -9.933 -26.276 -14.824  1.00 71.54           C  
ATOM   2455  CD  GLU B 371     -11.327 -26.182 -15.435  1.00 77.66           C  
ATOM   2456  OE1 GLU B 371     -12.238 -25.630 -14.775  1.00 79.67           O  
ATOM   2457  OE2 GLU B 371     -11.501 -26.668 -16.581  1.00 77.93           O  
ATOM   2458  N   GLY B 372      -6.388 -24.847 -14.828  1.00 44.37           N  
ATOM   2459  CA  GLY B 372      -5.594 -23.982 -15.720  1.00 46.10           C  
ATOM   2460  C   GLY B 372      -4.270 -23.512 -15.123  1.00 42.93           C  
ATOM   2461  O   GLY B 372      -3.413 -23.120 -15.908  1.00 48.40           O  
ATOM   2462  N   ILE B 373      -4.085 -23.535 -13.801  1.00 44.96           N  
ATOM   2463  CA  ILE B 373      -2.853 -23.009 -13.132  1.00 53.40           C  
ATOM   2464  C   ILE B 373      -1.650 -23.915 -13.458  1.00 56.44           C  
ATOM   2465  O   ILE B 373      -0.542 -23.352 -13.556  1.00 58.82           O  
ATOM   2466  CB  ILE B 373      -3.045 -22.799 -11.607  1.00 52.24           C  
ATOM   2467  CG1 ILE B 373      -2.764 -21.345 -11.194  1.00 48.21           C  
ATOM   2468  N   LEU B 374      -1.858 -25.228 -13.667  1.00 50.67           N  
ATOM   2469  CA  LEU B 374      -0.778 -26.233 -13.910  1.00 52.93           C  
ATOM   2470  C   LEU B 374       0.019 -25.845 -15.162  1.00 51.44           C  
ATOM   2471  O   LEU B 374       1.254 -25.864 -15.108  1.00 51.89           O  
ATOM   2472  CB  LEU B 374      -1.378 -27.637 -14.054  1.00 51.85           C  
ATOM   2473  CG  LEU B 374      -0.358 -28.775 -14.112  1.00 52.25           C  
ATOM   2474  N   GLU B 375      -0.688 -25.496 -16.232  1.00 52.10           N  
ATOM   2475  CA  GLU B 375      -0.164 -24.937 -17.503  1.00 54.61           C  
ATOM   2476  C   GLU B 375       0.753 -23.736 -17.217  1.00 55.56           C  
ATOM   2477  O   GLU B 375       1.812 -23.677 -17.856  1.00 47.11           O  
ATOM   2478  CB  GLU B 375      -1.365 -24.596 -18.387  1.00 61.31           C  
ATOM   2479  CG  GLU B 375      -1.209 -23.359 -19.240  1.00 70.09           C  
ATOM   2480  CD  GLU B 375      -2.451 -23.060 -20.069  1.00 83.67           C  
ATOM   2481  OE1 GLU B 375      -3.496 -23.717 -19.823  1.00 82.14           O  
ATOM   2482  OE2 GLU B 375      -2.379 -22.165 -20.953  1.00 90.97           O  
ATOM   2483  N   ILE B 376       0.367 -22.840 -16.292  1.00 51.78           N  
ATOM   2484  CA  ILE B 376       1.148 -21.626 -15.891  1.00 49.64           C  
ATOM   2485  C   ILE B 376       2.406 -22.075 -15.141  1.00 46.34           C  
ATOM   2486  O   ILE B 376       3.459 -21.477 -15.381  1.00 46.85           O  
ATOM   2487  CB  ILE B 376       0.322 -20.650 -15.017  1.00 52.29           C  
ATOM   2488  CG1 ILE B 376      -0.978 -20.180 -15.682  1.00 49.38           C  
ATOM   2489  CG2 ILE B 376       1.172 -19.471 -14.554  1.00 44.69           C  
ATOM   2490  CD1 ILE B 376      -0.777 -19.501 -16.998  1.00 53.09           C  
ATOM   2491  N   PHE B 377       2.296 -23.065 -14.255  1.00 43.74           N  
ATOM   2492  CA  PHE B 377       3.422 -23.621 -13.450  1.00 48.57           C  
ATOM   2493  C   PHE B 377       4.503 -24.238 -14.357  1.00 48.73           C  
ATOM   2494  O   PHE B 377       5.683 -24.087 -14.055  1.00 46.15           O  
ATOM   2495  CB  PHE B 377       2.922 -24.667 -12.445  1.00 47.26           C  
ATOM   2496  CG  PHE B 377       2.265 -24.120 -11.201  1.00 52.12           C  
ATOM   2497  CD1 PHE B 377       1.678 -22.861 -11.184  1.00 50.14           C  
ATOM   2498  CD2 PHE B 377       2.197 -24.888 -10.044  1.00 54.52           C  
ATOM   2499  CE1 PHE B 377       1.061 -22.381 -10.037  1.00 53.14           C  
ATOM   2500  CE2 PHE B 377       1.576 -24.406  -8.900  1.00 52.97           C  
ATOM   2501  CZ  PHE B 377       1.014 -23.153  -8.897  1.00 54.51           C  
ATOM   2502  N   ASP B 378       4.116 -24.916 -15.442  1.00 57.76           N  
ATOM   2503  CA  ASP B 378       5.062 -25.591 -16.375  1.00 55.97           C  
ATOM   2504  C   ASP B 378       5.852 -24.523 -17.143  1.00 50.65           C  
ATOM   2505  O   ASP B 378       7.078 -24.687 -17.268  1.00 41.49           O  
ATOM   2506  CB  ASP B 378       4.330 -26.558 -17.315  1.00 57.06           C  
ATOM   2507  CG  ASP B 378       3.661 -27.705 -16.584  1.00 58.17           C  
ATOM   2508  OD1 ASP B 378       4.134 -28.053 -15.490  1.00 63.64           O  
ATOM   2509  OD2 ASP B 378       2.651 -28.220 -17.097  1.00 65.76           O  
ATOM   2510  N   MET B 379       5.168 -23.488 -17.645  1.00 44.48           N  
ATOM   2511  CA  MET B 379       5.808 -22.282 -18.229  1.00 45.53           C  
ATOM   2512  C   MET B 379       6.868 -21.723 -17.274  1.00 40.07           C  
ATOM   2513  O   MET B 379       8.021 -21.622 -17.684  1.00 36.55           O  
ATOM   2514  CB  MET B 379       4.769 -21.200 -18.497  1.00 48.76           C  
ATOM   2515  CG  MET B 379       3.958 -21.507 -19.717  1.00 55.32           C  
ATOM   2516  SD  MET B 379       3.180 -20.038 -20.355  1.00 62.13           S  
ATOM   2517  CE  MET B 379       1.834 -20.810 -21.250  1.00 70.31           C  
ATOM   2518  N   LEU B 380       6.474 -21.420 -16.038  1.00 39.26           N  
ATOM   2519  CA  LEU B 380       7.339 -20.846 -14.969  1.00 41.51           C  
ATOM   2520  C   LEU B 380       8.549 -21.768 -14.739  1.00 40.25           C  
ATOM   2521  O   LEU B 380       9.715 -21.305 -14.836  1.00 38.85           O  
ATOM   2522  CB  LEU B 380       6.485 -20.634 -13.705  1.00 41.20           C  
ATOM   2523  CG  LEU B 380       5.412 -19.538 -13.821  1.00 45.50           C  
ATOM   2524  CD1 LEU B 380       4.416 -19.569 -12.664  1.00 46.22           C  
ATOM   2525  CD2 LEU B 380       6.051 -18.164 -13.921  1.00 44.88           C  
ATOM   2526  N   LEU B 381       8.291 -23.053 -14.537  1.00 39.85           N  
ATOM   2527  CA  LEU B 381       9.339 -24.060 -14.243  1.00 40.40           C  
ATOM   2528  C   LEU B 381      10.299 -24.245 -15.420  1.00 37.50           C  
ATOM   2529  O   LEU B 381      11.497 -24.368 -15.152  1.00 42.03           O  
ATOM   2530  CB  LEU B 381       8.663 -25.371 -13.871  1.00 37.35           C  
ATOM   2531  CG  LEU B 381       8.183 -25.413 -12.430  1.00 38.03           C  
ATOM   2532  CD1 LEU B 381       7.141 -26.502 -12.248  1.00 37.66           C  
ATOM   2533  CD2 LEU B 381       9.364 -25.615 -11.494  1.00 38.96           C  
ATOM   2534  N   ALA B 382       9.792 -24.301 -16.652  1.00 37.23           N  
ATOM   2535  CA  ALA B 382      10.591 -24.473 -17.888  1.00 34.05           C  
ATOM   2536  C   ALA B 382      11.530 -23.271 -18.049  1.00 35.44           C  
ATOM   2537  O   ALA B 382      12.736 -23.461 -18.020  1.00 35.32           O  
ATOM   2538  CB  ALA B 382       9.681 -24.643 -19.069  1.00 33.54           C  
ATOM   2539  N   THR B 383      10.982 -22.059 -18.140  1.00 37.78           N  
ATOM   2540  CA  THR B 383      11.748 -20.790 -18.164  1.00 35.36           C  
ATOM   2541  C   THR B 383      12.769 -20.706 -17.018  1.00 36.74           C  
ATOM   2542  O   THR B 383      13.900 -20.255 -17.292  1.00 40.19           O  
ATOM   2543  CB  THR B 383      10.783 -19.610 -18.129  1.00 35.11           C  
ATOM   2544  OG1 THR B 383       9.881 -19.821 -19.213  1.00 36.01           O  
ATOM   2545  CG2 THR B 383      11.490 -18.282 -18.265  1.00 33.33           C  
ATOM   2546  N   THR B 384      12.391 -21.062 -15.783  1.00 40.47           N  
ATOM   2547  CA  THR B 384      13.298 -21.075 -14.599  1.00 42.37           C  
ATOM   2548  C   THR B 384      14.480 -22.006 -14.902  1.00 41.90           C  
ATOM   2549  O   THR B 384      15.581 -21.691 -14.398  1.00 44.57           O  
ATOM   2550  CB  THR B 384      12.596 -21.480 -13.288  1.00 44.53           C  
ATOM   2551  OG1 THR B 384      11.590 -20.544 -12.908  1.00 41.77           O  
ATOM   2552  CG2 THR B 384      13.514 -21.560 -12.084  1.00 43.52           C  
ATOM   2553  N   SER B 385      14.273 -23.084 -15.681  1.00 37.00           N  
ATOM   2554  CA  SER B 385      15.320 -24.089 -16.039  1.00 39.73           C  
ATOM   2555  C   SER B 385      16.290 -23.510 -17.076  1.00 41.90           C  
ATOM   2556  O   SER B 385      17.511 -23.776 -16.939  1.00 43.70           O  
ATOM   2557  CB  SER B 385      14.739 -25.393 -16.543  1.00 41.03           C  
ATOM   2558  OG  SER B 385      13.879 -25.963 -15.575  1.00 44.07           O  
ATOM   2559  N   ARG B 386      15.762 -22.791 -18.081  1.00 37.80           N  
ATOM   2560  CA  ARG B 386      16.558 -22.022 -19.066  1.00 40.22           C  
ATOM   2561  C   ARG B 386      17.465 -21.039 -18.307  1.00 38.68           C  
ATOM   2562  O   ARG B 386      18.641 -20.915 -18.668  1.00 38.73           O  
ATOM   2563  CB  ARG B 386      15.646 -21.339 -20.096  1.00 42.66           C  
ATOM   2564  N   PHE B 387      16.970 -20.377 -17.270  1.00 37.70           N  
ATOM   2565  CA  PHE B 387      17.792 -19.421 -16.479  1.00 39.48           C  
ATOM   2566  C   PHE B 387      18.844 -20.187 -15.652  1.00 36.91           C  
ATOM   2567  O   PHE B 387      19.963 -19.657 -15.459  1.00 35.64           O  
ATOM   2568  CB  PHE B 387      16.892 -18.500 -15.651  1.00 39.46           C  
ATOM   2569  CG  PHE B 387      16.210 -17.382 -16.406  1.00 40.77           C  
ATOM   2570  CD1 PHE B 387      16.939 -16.326 -16.937  1.00 43.66           C  
ATOM   2571  CD2 PHE B 387      14.828 -17.346 -16.542  1.00 42.34           C  
ATOM   2572  CE1 PHE B 387      16.310 -15.271 -17.592  1.00 40.87           C  
ATOM   2573  CE2 PHE B 387      14.197 -16.284 -17.182  1.00 37.80           C  
ATOM   2574  CZ  PHE B 387      14.937 -15.248 -17.697  1.00 40.31           C  
ATOM   2575  N   ARG B 388      18.524 -21.401 -15.204  1.00 34.56           N  
ATOM   2576  CA  ARG B 388      19.428 -22.242 -14.372  1.00 42.15           C  
ATOM   2577  C   ARG B 388      20.591 -22.723 -15.241  1.00 40.82           C  
ATOM   2578  O   ARG B 388      21.706 -22.736 -14.739  1.00 43.17           O  
ATOM   2579  CB  ARG B 388      18.712 -23.448 -13.754  1.00 46.22           C  
ATOM   2580  CG  ARG B 388      19.586 -24.319 -12.852  1.00 46.70           C  
ATOM   2581  CD  ARG B 388      18.820 -25.521 -12.297  1.00 51.97           C  
ATOM   2582  NE  ARG B 388      17.839 -25.107 -11.299  1.00 59.06           N  
ATOM   2583  CZ  ARG B 388      16.526 -24.994 -11.492  1.00 63.07           C  
ATOM   2584  NH1 ARG B 388      15.977 -25.322 -12.650  1.00 65.74           N  
ATOM   2585  NH2 ARG B 388      15.758 -24.570 -10.503  1.00 64.47           N  
ATOM   2586  N   GLU B 389      20.317 -23.052 -16.501  1.00 43.67           N  
ATOM   2587  CA  GLU B 389      21.302 -23.616 -17.464  1.00 48.15           C  
ATOM   2588  C   GLU B 389      22.137 -22.501 -18.097  1.00 44.19           C  
ATOM   2589  O   GLU B 389      23.280 -22.791 -18.443  1.00 46.05           O  
ATOM   2590  CB  GLU B 389      20.596 -24.525 -18.472  1.00 50.39           C  
ATOM   2591  CG  GLU B 389      20.362 -25.917 -17.892  1.00 58.39           C  
ATOM   2592  CD  GLU B 389      19.032 -26.562 -18.237  1.00 70.19           C  
ATOM   2593  OE1 GLU B 389      18.703 -26.620 -19.443  1.00 76.38           O  
ATOM   2594  OE2 GLU B 389      18.324 -27.001 -17.296  1.00 76.30           O  
ATOM   2595  N   LEU B 390      21.621 -21.269 -18.188  1.00 45.47           N  
ATOM   2596  CA  LEU B 390      22.421 -20.067 -18.544  1.00 38.76           C  
ATOM   2597  C   LEU B 390      23.239 -19.649 -17.321  1.00 35.37           C  
ATOM   2598  O   LEU B 390      24.042 -18.745 -17.464  1.00 38.42           O  
ATOM   2599  CB  LEU B 390      21.495 -18.941 -19.027  1.00 42.13           C  
ATOM   2600  CG  LEU B 390      20.941 -19.120 -20.445  1.00 46.46           C  
ATOM   2601  CD1 LEU B 390      19.879 -18.079 -20.790  1.00 43.05           C  
ATOM   2602  CD2 LEU B 390      22.067 -19.083 -21.480  1.00 47.22           C  
ATOM   2603  N   LYS B 391      22.996 -20.240 -16.146  1.00 35.88           N  
ATOM   2604  CA  LYS B 391      23.678 -19.867 -14.876  1.00 34.94           C  
ATOM   2605  C   LYS B 391      23.511 -18.364 -14.630  1.00 34.86           C  
ATOM   2606  O   LYS B 391      24.480 -17.680 -14.283  1.00 36.53           O  
ATOM   2607  CB  LYS B 391      25.124 -20.363 -14.928  1.00 37.85           C  
ATOM   2608  CG  LYS B 391      25.225 -21.885 -14.864  1.00 41.85           C  
ATOM   2609  CD  LYS B 391      26.508 -22.498 -15.414  1.00 48.90           C  
ATOM   2610  CE  LYS B 391      27.384 -23.103 -14.343  1.00 52.85           C  
ATOM   2611  NZ  LYS B 391      27.674 -22.109 -13.282  1.00 59.47           N  
ATOM   2612  N   LEU B 392      22.282 -17.871 -14.767  1.00 38.68           N  
ATOM   2613  CA  LEU B 392      21.918 -16.467 -14.426  1.00 34.64           C  
ATOM   2614  C   LEU B 392      22.571 -16.018 -13.100  1.00 31.72           C  
ATOM   2615  O   LEU B 392      22.342 -16.610 -12.061  1.00 35.13           O  
ATOM   2616  CB  LEU B 392      20.396 -16.318 -14.380  1.00 32.58           C  
ATOM   2617  CG  LEU B 392      19.924 -14.904 -14.017  1.00 34.45           C  
ATOM   2618  CD1 LEU B 392      20.233 -13.914 -15.128  1.00 34.33           C  
ATOM   2619  CD2 LEU B 392      18.459 -14.876 -13.659  1.00 34.16           C  
ATOM   2620  N   GLN B 393      23.365 -14.963 -13.163  1.00 31.65           N  
ATOM   2621  CA  GLN B 393      24.049 -14.348 -12.010  1.00 32.25           C  
ATOM   2622  C   GLN B 393      23.127 -13.307 -11.364  1.00 33.11           C  
ATOM   2623  O   GLN B 393      22.274 -12.731 -12.061  1.00 28.67           O  
ATOM   2624  CB  GLN B 393      25.344 -13.715 -12.501  1.00 33.29           C  
ATOM   2625  CG  GLN B 393      26.247 -14.714 -13.204  1.00 38.30           C  
ATOM   2626  CD  GLN B 393      26.653 -15.826 -12.263  1.00 41.44           C  
ATOM   2627  OE1 GLN B 393      27.299 -15.568 -11.247  1.00 38.93           O  
ATOM   2628  NE2 GLN B 393      26.229 -17.054 -12.566  1.00 37.27           N  
ATOM   2629  N   HIS B 394      23.341 -13.082 -10.069  1.00 33.39           N  
ATOM   2630  CA  HIS B 394      22.537 -12.188  -9.214  1.00 34.92           C  
ATOM   2631  C   HIS B 394      22.513 -10.807  -9.852  1.00 34.50           C  
ATOM   2632  O   HIS B 394      21.422 -10.206  -9.902  1.00 32.48           O  
ATOM   2633  CB  HIS B 394      23.074 -12.169  -7.776  1.00 35.25           C  
ATOM   2634  CG  HIS B 394      22.215 -11.397  -6.820  1.00 35.62           C  
ATOM   2635  ND1 HIS B 394      20.829 -11.526  -6.781  1.00 35.60           N  
ATOM   2636  CD2 HIS B 394      22.534 -10.523  -5.846  1.00 34.49           C  
ATOM   2637  CE1 HIS B 394      20.348 -10.729  -5.850  1.00 35.34           C  
ATOM   2638  NE2 HIS B 394      21.370 -10.122  -5.256  1.00 36.41           N  
ATOM   2639  N   LYS B 395      23.657 -10.323 -10.324  1.00 33.15           N  
ATOM   2640  CA  LYS B 395      23.741  -8.926 -10.822  1.00 33.45           C  
ATOM   2641  C   LYS B 395      23.099  -8.844 -12.213  1.00 32.92           C  
ATOM   2642  O   LYS B 395      22.565  -7.768 -12.525  1.00 29.69           O  
ATOM   2643  CB  LYS B 395      25.162  -8.385 -10.703  1.00 35.04           C  
ATOM   2644  CG  LYS B 395      25.487  -8.064  -9.255  1.00 39.58           C  
ATOM   2645  CD  LYS B 395      26.896  -7.675  -8.958  1.00 49.56           C  
ATOM   2646  CE  LYS B 395      27.082  -7.396  -7.477  1.00 54.24           C  
ATOM   2647  NZ  LYS B 395      28.514  -7.416  -7.095  1.00 58.88           N  
ATOM   2648  N   GLU B 396      23.053  -9.948 -12.975  1.00 28.82           N  
ATOM   2649  CA  GLU B 396      22.306  -9.984 -14.260  1.00 28.24           C  
ATOM   2650  C   GLU B 396      20.810  -9.896 -13.969  1.00 26.42           C  
ATOM   2651  O   GLU B 396      20.129  -9.115 -14.625  1.00 30.38           O  
ATOM   2652  CB  GLU B 396      22.615 -11.250 -15.035  1.00 29.25           C  
ATOM   2653  CG  GLU B 396      24.049 -11.303 -15.513  1.00 29.12           C  
ATOM   2654  CD  GLU B 396      24.454 -12.648 -16.091  1.00 27.59           C  
ATOM   2655  OE1 GLU B 396      23.817 -13.675 -15.766  1.00 29.23           O  
ATOM   2656  OE2 GLU B 396      25.391 -12.651 -16.893  1.00 29.74           O  
ATOM   2657  N   TYR B 397      20.328 -10.654 -12.992  1.00 27.17           N  
ATOM   2658  CA  TYR B 397      18.895 -10.708 -12.593  1.00 28.02           C  
ATOM   2659  C   TYR B 397      18.379  -9.301 -12.242  1.00 26.27           C  
ATOM   2660  O   TYR B 397      17.316  -8.915 -12.689  1.00 25.39           O  
ATOM   2661  CB  TYR B 397      18.682 -11.670 -11.430  1.00 27.10           C  
ATOM   2662  CG  TYR B 397      17.438 -11.369 -10.635  1.00 27.46           C  
ATOM   2663  CD1 TYR B 397      16.178 -11.631 -11.150  1.00 27.66           C  
ATOM   2664  CD2 TYR B 397      17.526 -10.825  -9.367  1.00 27.79           C  
ATOM   2665  CE1 TYR B 397      15.035 -11.345 -10.420  1.00 30.70           C  
ATOM   2666  CE2 TYR B 397      16.398 -10.533  -8.627  1.00 28.58           C  
ATOM   2667  CZ  TYR B 397      15.154 -10.780  -9.162  1.00 30.01           C  
ATOM   2668  OH  TYR B 397      14.058 -10.471  -8.423  1.00 41.15           O  
ATOM   2669  N   LEU B 398      19.140  -8.570 -11.443  1.00 28.83           N  
ATOM   2670  CA  LEU B 398      18.793  -7.231 -10.935  1.00 28.87           C  
ATOM   2671  C   LEU B 398      18.539  -6.306 -12.111  1.00 30.13           C  
ATOM   2672  O   LEU B 398      17.549  -5.548 -12.037  1.00 26.05           O  
ATOM   2673  CB  LEU B 398      19.946  -6.720 -10.081  1.00 31.23           C  
ATOM   2674  CG  LEU B 398      20.058  -7.336  -8.691  1.00 32.05           C  
ATOM   2675  CD1 LEU B 398      21.140  -6.610  -7.907  1.00 33.61           C  
ATOM   2676  CD2 LEU B 398      18.731  -7.290  -7.941  1.00 30.74           C  
ATOM   2677  N   CYS B 399      19.434  -6.366 -13.112  1.00 31.44           N  
ATOM   2678  CA  CYS B 399      19.400  -5.564 -14.357  1.00 29.58           C  
ATOM   2679  C   CYS B 399      18.183  -5.991 -15.200  1.00 30.73           C  
ATOM   2680  O   CYS B 399      17.339  -5.122 -15.573  1.00 29.03           O  
ATOM   2681  CB  CYS B 399      20.705  -5.717 -15.141  1.00 32.20           C  
ATOM   2682  SG  CYS B 399      22.131  -4.814 -14.453  1.00 32.44           S  
ATOM   2683  N   VAL B 400      18.059  -7.295 -15.465  1.00 29.26           N  
ATOM   2684  CA  VAL B 400      16.986  -7.874 -16.315  1.00 27.52           C  
ATOM   2685  C   VAL B 400      15.634  -7.473 -15.691  1.00 28.36           C  
ATOM   2686  O   VAL B 400      14.767  -6.996 -16.443  1.00 28.96           O  
ATOM   2687  CB  VAL B 400      17.166  -9.393 -16.500  1.00 25.77           C  
ATOM   2688  N   LYS B 401      15.458  -7.562 -14.368  1.00 26.34           N  
ATOM   2689  CA  LYS B 401      14.143  -7.237 -13.745  1.00 28.09           C  
ATOM   2690  C   LYS B 401      13.764  -5.755 -13.930  1.00 26.19           C  
ATOM   2691  O   LYS B 401      12.606  -5.502 -14.289  1.00 23.96           O  
ATOM   2692  CB  LYS B 401      14.116  -7.626 -12.275  1.00 27.35           C  
ATOM   2693  CG  LYS B 401      12.746  -7.463 -11.645  1.00 29.57           C  
ATOM   2694  CD  LYS B 401      12.684  -7.912 -10.220  1.00 32.96           C  
ATOM   2695  CE  LYS B 401      13.707  -7.213  -9.360  1.00 33.17           C  
ATOM   2696  NZ  LYS B 401      13.481  -7.509  -7.937  1.00 38.94           N  
ATOM   2697  N   ALA B 402      14.669  -4.808 -13.657  1.00 26.73           N  
ATOM   2698  CA  ALA B 402      14.469  -3.369 -13.966  1.00 27.21           C  
ATOM   2699  C   ALA B 402      14.118  -3.173 -15.449  1.00 29.55           C  
ATOM   2700  O   ALA B 402      13.329  -2.257 -15.763  1.00 28.04           O  
ATOM   2701  CB  ALA B 402      15.719  -2.591 -13.636  1.00 27.74           C  
ATOM   2702  N   MET B 403      14.772  -3.931 -16.341  1.00 29.74           N  
ATOM   2703  CA  MET B 403      14.611  -3.784 -17.808  1.00 29.80           C  
ATOM   2704  C   MET B 403      13.181  -4.166 -18.196  1.00 27.14           C  
ATOM   2705  O   MET B 403      12.618  -3.511 -19.057  1.00 24.77           O  
ATOM   2706  CB  MET B 403      15.625  -4.636 -18.588  1.00 31.64           C  
ATOM   2707  CG  MET B 403      17.037  -4.044 -18.567  1.00 35.50           C  
ATOM   2708  SD  MET B 403      18.370  -5.122 -19.280  1.00 36.22           S  
ATOM   2709  CE  MET B 403      17.904  -4.960 -21.000  1.00 34.08           C  
ATOM   2710  N   ILE B 404      12.624  -5.202 -17.574  1.00 28.81           N  
ATOM   2711  CA  ILE B 404      11.216  -5.634 -17.791  1.00 28.02           C  
ATOM   2712  C   ILE B 404      10.313  -4.475 -17.409  1.00 26.97           C  
ATOM   2713  O   ILE B 404       9.437  -4.130 -18.194  1.00 24.30           O  
ATOM   2714  CB  ILE B 404      10.880  -6.873 -16.967  1.00 30.08           C  
ATOM   2715  CG1 ILE B 404      11.593  -8.106 -17.516  1.00 35.20           C  
ATOM   2716  CG2 ILE B 404       9.372  -7.066 -16.923  1.00 35.32           C  
ATOM   2717  CD1 ILE B 404      11.549  -9.301 -16.592  1.00 37.91           C  
ATOM   2718  N   LEU B 405      10.551  -3.881 -16.249  1.00 26.56           N  
ATOM   2719  CA  LEU B 405       9.753  -2.721 -15.805  1.00 30.16           C  
ATOM   2720  C   LEU B 405       9.881  -1.615 -16.857  1.00 31.04           C  
ATOM   2721  O   LEU B 405       8.855  -1.183 -17.406  1.00 36.77           O  
ATOM   2722  CB  LEU B 405      10.223  -2.255 -14.422  1.00 30.61           C  
ATOM   2723  CG  LEU B 405       9.709  -0.867 -14.005  1.00 32.61           C  
ATOM   2724  CD1 LEU B 405       8.197  -0.882 -13.832  1.00 31.20           C  
ATOM   2725  CD2 LEU B 405      10.398  -0.399 -12.721  1.00 35.74           C  
ATOM   2726  N   LEU B 406      11.099  -1.152 -17.116  1.00 34.22           N  
ATOM   2727  CA  LEU B 406      11.314   0.078 -17.928  1.00 32.87           C  
ATOM   2728  C   LEU B 406      11.044  -0.179 -19.415  1.00 34.93           C  
ATOM   2729  O   LEU B 406      10.979   0.844 -20.137  1.00 36.43           O  
ATOM   2730  CB  LEU B 406      12.741   0.599 -17.738  1.00 30.85           C  
ATOM   2731  CG  LEU B 406      13.123   0.973 -16.307  1.00 33.26           C  
ATOM   2732  CD1 LEU B 406      14.635   0.991 -16.148  1.00 34.06           C  
ATOM   2733  CD2 LEU B 406      12.535   2.325 -15.912  1.00 34.25           C  
ATOM   2734  N   ASN B 407      10.956  -1.438 -19.876  1.00 30.93           N  
ATOM   2735  CA  ASN B 407      10.751  -1.746 -21.324  1.00 35.98           C  
ATOM   2736  C   ASN B 407       9.285  -2.083 -21.607  1.00 37.51           C  
ATOM   2737  O   ASN B 407       8.976  -2.433 -22.748  1.00 42.07           O  
ATOM   2738  CB  ASN B 407      11.640  -2.884 -21.847  1.00 35.91           C  
ATOM   2739  CG  ASN B 407      11.535  -3.071 -23.349  1.00 32.48           C  
ATOM   2740  OD1 ASN B 407      11.527  -2.094 -24.092  1.00 27.65           O  
ATOM   2741  ND2 ASN B 407      11.432  -4.310 -23.809  1.00 30.08           N  
ATOM   2742  N   SER B 408       8.398  -1.939 -20.630  1.00 41.55           N  
ATOM   2743  CA  SER B 408       7.007  -2.455 -20.711  1.00 46.45           C  
ATOM   2744  C   SER B 408       6.098  -1.498 -21.504  1.00 48.88           C  
ATOM   2745  O   SER B 408       4.985  -1.921 -21.835  1.00 54.70           O  
ATOM   2746  CB  SER B 408       6.462  -2.755 -19.334  1.00 46.55           C  
ATOM   2747  OG  SER B 408       6.609  -1.629 -18.477  1.00 50.80           O  
ATOM   2748  N   SER B 409       6.546  -0.281 -21.827  1.00 45.83           N  
ATOM   2749  CA  SER B 409       5.804   0.689 -22.679  1.00 50.37           C  
ATOM   2750  N   ASP B 421      11.299  16.030 -20.113  1.00 60.16           N  
ATOM   2751  CA  ASP B 421      10.494  15.151 -21.010  1.00 64.06           C  
ATOM   2752  C   ASP B 421      10.666  13.674 -20.606  1.00 69.15           C  
ATOM   2753  O   ASP B 421      11.822  13.195 -20.532  1.00 63.77           O  
ATOM   2754  CB  ASP B 421      10.870  15.344 -22.480  1.00 62.85           C  
ATOM   2755  CG  ASP B 421      10.083  14.426 -23.394  1.00 66.42           C  
ATOM   2756  OD1 ASP B 421       8.964  14.810 -23.792  1.00 73.34           O  
ATOM   2757  OD2 ASP B 421      10.569  13.317 -23.659  1.00 67.15           O  
ATOM   2758  N   SER B 422       9.552  12.968 -20.378  1.00 68.77           N  
ATOM   2759  CA  SER B 422       9.527  11.645 -19.699  1.00 68.36           C  
ATOM   2760  C   SER B 422       9.974  10.564 -20.689  1.00 59.54           C  
ATOM   2761  O   SER B 422      10.776   9.716 -20.273  1.00 55.95           O  
ATOM   2762  CB  SER B 422       8.178  11.344 -19.065  1.00 60.54           C  
ATOM   2763  N   SER B 423       9.512  10.625 -21.945  1.00 54.31           N  
ATOM   2764  CA  SER B 423       9.867   9.664 -23.027  1.00 55.33           C  
ATOM   2765  C   SER B 423      11.387   9.621 -23.209  1.00 53.91           C  
ATOM   2766  O   SER B 423      11.930   8.514 -23.367  1.00 54.58           O  
ATOM   2767  CB  SER B 423       9.188   9.981 -24.335  1.00 54.03           C  
ATOM   2768  N   ARG B 424      12.030  10.790 -23.223  1.00 49.53           N  
ATOM   2769  CA  ARG B 424      13.493  10.925 -23.387  1.00 47.72           C  
ATOM   2770  C   ARG B 424      14.175  10.368 -22.135  1.00 43.22           C  
ATOM   2771  O   ARG B 424      15.183   9.671 -22.308  1.00 44.67           O  
ATOM   2772  CB  ARG B 424      13.891  12.379 -23.678  1.00 46.09           C  
ATOM   2773  N   LYS B 425      13.632  10.626 -20.938  1.00 41.94           N  
ATOM   2774  CA  LYS B 425      14.208  10.147 -19.644  1.00 42.21           C  
ATOM   2775  C   LYS B 425      14.095   8.623 -19.527  1.00 39.86           C  
ATOM   2776  O   LYS B 425      15.001   8.000 -18.953  1.00 39.47           O  
ATOM   2777  CB  LYS B 425      13.509  10.773 -18.440  1.00 44.57           C  
ATOM   2778  CG  LYS B 425      13.898  12.213 -18.123  1.00 48.89           C  
ATOM   2779  CD  LYS B 425      12.940  12.848 -17.127  1.00 52.69           C  
ATOM   2780  CE  LYS B 425      13.093  14.347 -16.986  1.00 55.14           C  
ATOM   2781  NZ  LYS B 425      14.268  14.685 -16.157  1.00 54.47           N  
ATOM   2782  N   LEU B 426      13.008   8.037 -20.018  1.00 36.62           N  
ATOM   2783  CA  LEU B 426      12.792   6.576 -19.904  1.00 36.04           C  
ATOM   2784  C   LEU B 426      13.785   5.855 -20.820  1.00 39.25           C  
ATOM   2785  O   LEU B 426      14.468   4.882 -20.369  1.00 36.78           O  
ATOM   2786  CB  LEU B 426      11.349   6.274 -20.290  1.00 35.84           C  
ATOM   2787  CG  LEU B 426      10.929   4.820 -20.173  1.00 33.50           C  
ATOM   2788  CD1 LEU B 426      11.131   4.329 -18.763  1.00 32.14           C  
ATOM   2789  CD2 LEU B 426       9.487   4.676 -20.613  1.00 37.41           C  
ATOM   2790  N   ALA B 427      13.878   6.312 -22.071  1.00 39.34           N  
ATOM   2791  CA  ALA B 427      14.908   5.852 -23.024  1.00 35.09           C  
ATOM   2792  C   ALA B 427      16.279   5.898 -22.336  1.00 35.02           C  
ATOM   2793  O   ALA B 427      16.980   4.877 -22.334  1.00 40.27           O  
ATOM   2794  CB  ALA B 427      14.841   6.685 -24.268  1.00 32.10           C  
ATOM   2795  N   HIS B 428      16.619   7.020 -21.709  1.00 34.94           N  
ATOM   2796  CA  HIS B 428      17.922   7.214 -21.027  1.00 39.75           C  
ATOM   2797  C   HIS B 428      18.063   6.203 -19.898  1.00 39.36           C  
ATOM   2798  O   HIS B 428      19.093   5.506 -19.864  1.00 43.35           O  
ATOM   2799  CB  HIS B 428      18.075   8.626 -20.460  1.00 44.03           C  
ATOM   2800  CG  HIS B 428      19.498   8.972 -20.192  1.00 55.81           C  
ATOM   2801  ND1 HIS B 428      20.373   9.325 -21.211  1.00 64.10           N  
ATOM   2802  CD2 HIS B 428      20.210   9.027 -19.043  1.00 59.87           C  
ATOM   2803  CE1 HIS B 428      21.563   9.577 -20.698  1.00 64.29           C  
ATOM   2804  NE2 HIS B 428      21.489   9.402 -19.368  1.00 61.13           N  
ATOM   2805  N   LEU B 429      17.075   6.157 -18.999  1.00 33.17           N  
ATOM   2806  CA  LEU B 429      17.070   5.275 -17.808  1.00 30.75           C  
ATOM   2807  C   LEU B 429      17.200   3.806 -18.244  1.00 28.59           C  
ATOM   2808  O   LEU B 429      17.974   3.071 -17.626  1.00 26.16           O  
ATOM   2809  CB  LEU B 429      15.772   5.553 -17.047  1.00 34.43           C  
ATOM   2810  CG  LEU B 429      15.519   4.711 -15.802  1.00 38.36           C  
ATOM   2811  CD1 LEU B 429      16.766   4.590 -14.916  1.00 40.38           C  
ATOM   2812  CD2 LEU B 429      14.373   5.302 -15.013  1.00 39.59           C  
ATOM   2813  N   LEU B 430      16.505   3.405 -19.303  1.00 29.08           N  
ATOM   2814  CA  LEU B 430      16.598   2.052 -19.928  1.00 29.92           C  
ATOM   2815  C   LEU B 430      17.958   1.859 -20.627  1.00 32.37           C  
ATOM   2816  O   LEU B 430      18.519   0.750 -20.562  1.00 30.32           O  
ATOM   2817  CB  LEU B 430      15.435   1.912 -20.915  1.00 31.94           C  
ATOM   2818  CG  LEU B 430      15.312   0.565 -21.635  1.00 34.80           C  
ATOM   2819  CD1 LEU B 430      15.306  -0.624 -20.656  1.00 32.67           C  
ATOM   2820  CD2 LEU B 430      14.059   0.555 -22.493  1.00 35.05           C  
ATOM   2821  N   ASN B 431      18.515   2.884 -21.266  1.00 32.92           N  
ATOM   2822  CA  ASN B 431      19.894   2.755 -21.803  1.00 35.68           C  
ATOM   2823  C   ASN B 431      20.869   2.494 -20.626  1.00 35.19           C  
ATOM   2824  O   ASN B 431      21.774   1.647 -20.782  1.00 30.47           O  
ATOM   2825  CB  ASN B 431      20.236   3.919 -22.752  1.00 38.60           C  
ATOM   2826  CG  ASN B 431      19.912   3.581 -24.200  1.00 39.69           C  
ATOM   2827  N   ALA B 432      20.663   3.118 -19.459  1.00 28.24           N  
ATOM   2828  CA  ALA B 432      21.593   3.055 -18.312  1.00 28.40           C  
ATOM   2829  C   ALA B 432      21.528   1.662 -17.687  1.00 28.95           C  
ATOM   2830  O   ALA B 432      22.594   1.060 -17.409  1.00 30.34           O  
ATOM   2831  CB  ALA B 432      21.255   4.128 -17.309  1.00 26.96           C  
ATOM   2832  N   VAL B 433      20.329   1.136 -17.468  1.00 30.31           N  
ATOM   2833  CA  VAL B 433      20.221  -0.247 -16.925  1.00 31.56           C  
ATOM   2834  C   VAL B 433      20.838  -1.236 -17.924  1.00 30.04           C  
ATOM   2835  O   VAL B 433      21.575  -2.123 -17.477  1.00 32.21           O  
ATOM   2836  CB  VAL B 433      18.789  -0.608 -16.517  1.00 33.05           C  
ATOM   2837  CG1 VAL B 433      18.699  -2.063 -16.073  1.00 31.55           C  
ATOM   2838  CG2 VAL B 433      18.293   0.326 -15.424  1.00 33.80           C  
ATOM   2839  N   THR B 434      20.618  -1.040 -19.223  1.00 29.44           N  
ATOM   2840  CA  THR B 434      21.173  -1.886 -20.309  1.00 27.81           C  
ATOM   2841  C   THR B 434      22.690  -1.792 -20.314  1.00 26.73           C  
ATOM   2842  O   THR B 434      23.332  -2.828 -20.413  1.00 25.76           O  
ATOM   2843  CB  THR B 434      20.649  -1.472 -21.684  1.00 30.24           C  
ATOM   2844  OG1 THR B 434      19.243  -1.709 -21.660  1.00 36.00           O  
ATOM   2845  CG2 THR B 434      21.272  -2.252 -22.818  1.00 32.81           C  
ATOM   2846  N   ASP B 435      23.229  -0.576 -20.201  1.00 30.51           N  
ATOM   2847  CA  ASP B 435      24.684  -0.337 -20.044  1.00 30.99           C  
ATOM   2848  C   ASP B 435      25.190  -1.141 -18.836  1.00 30.48           C  
ATOM   2849  O   ASP B 435      26.211  -1.862 -18.989  1.00 30.67           O  
ATOM   2850  CB  ASP B 435      24.996   1.159 -19.979  1.00 34.74           C  
ATOM   2851  CG  ASP B 435      26.485   1.466 -20.086  1.00 40.04           C  
ATOM   2852  OD1 ASP B 435      27.036   1.334 -21.193  1.00 47.22           O  
ATOM   2853  OD2 ASP B 435      27.087   1.795 -19.054  1.00 38.88           O  
ATOM   2854  N   ALA B 436      24.473  -1.113 -17.711  1.00 28.57           N  
ATOM   2855  CA  ALA B 436      24.842  -1.860 -16.482  1.00 26.79           C  
ATOM   2856  C   ALA B 436      24.891  -3.358 -16.761  1.00 27.72           C  
ATOM   2857  O   ALA B 436      25.880  -3.996 -16.348  1.00 29.03           O  
ATOM   2858  CB  ALA B 436      23.886  -1.572 -15.361  1.00 28.13           C  
ATOM   2859  N   LEU B 437      23.879  -3.928 -17.420  1.00 29.24           N  
ATOM   2860  CA  LEU B 437      23.898  -5.389 -17.725  1.00 27.61           C  
ATOM   2861  C   LEU B 437      25.076  -5.676 -18.665  1.00 30.28           C  
ATOM   2862  O   LEU B 437      25.767  -6.723 -18.503  1.00 32.43           O  
ATOM   2863  CB  LEU B 437      22.585  -5.802 -18.386  1.00 25.70           C  
ATOM   2864  CG  LEU B 437      22.496  -7.278 -18.767  1.00 25.89           C  
ATOM   2865  CD1 LEU B 437      22.785  -8.193 -17.608  1.00 23.85           C  
ATOM   2866  CD2 LEU B 437      21.144  -7.590 -19.360  1.00 26.53           C  
ATOM   2867  N   VAL B 438      25.329  -4.800 -19.639  1.00 29.73           N  
ATOM   2868  CA  VAL B 438      26.454  -5.053 -20.586  1.00 29.34           C  
ATOM   2869  C   VAL B 438      27.759  -5.119 -19.775  1.00 30.51           C  
ATOM   2870  O   VAL B 438      28.529  -6.053 -20.008  1.00 32.42           O  
ATOM   2871  CB  VAL B 438      26.474  -4.042 -21.743  1.00 29.37           C  
ATOM   2872  CG1 VAL B 438      27.803  -4.062 -22.509  1.00 29.56           C  
ATOM   2873  CG2 VAL B 438      25.296  -4.298 -22.687  1.00 28.61           C  
ATOM   2874  N   TRP B 439      27.928  -4.238 -18.780  1.00 30.09           N  
ATOM   2875  CA  TRP B 439      29.090  -4.188 -17.848  1.00 30.77           C  
ATOM   2876  C   TRP B 439      29.191  -5.458 -17.013  1.00 28.96           C  
ATOM   2877  O   TRP B 439      30.267  -6.033 -16.968  1.00 32.39           O  
ATOM   2878  CB  TRP B 439      28.999  -2.955 -16.955  1.00 34.69           C  
ATOM   2879  CG  TRP B 439      30.058  -2.817 -15.902  1.00 36.62           C  
ATOM   2880  CD1 TRP B 439      31.245  -2.159 -16.026  1.00 35.42           C  
ATOM   2881  CD2 TRP B 439      29.973  -3.239 -14.523  1.00 35.22           C  
ATOM   2882  NE1 TRP B 439      31.934  -2.202 -14.840  1.00 37.24           N  
ATOM   2883  CE2 TRP B 439      31.179  -2.853 -13.899  1.00 36.81           C  
ATOM   2884  CE3 TRP B 439      29.018  -3.931 -13.763  1.00 37.70           C  
ATOM   2885  CZ2 TRP B 439      31.449  -3.146 -12.557  1.00 38.28           C  
ATOM   2886  CZ3 TRP B 439      29.283  -4.234 -12.442  1.00 36.99           C  
ATOM   2887  CH2 TRP B 439      30.484  -3.833 -11.842  1.00 40.55           C  
ATOM   2888  N   VAL B 440      28.109  -5.870 -16.357  1.00 28.51           N  
ATOM   2889  CA  VAL B 440      28.100  -7.093 -15.518  1.00 25.79           C  
ATOM   2890  C   VAL B 440      28.602  -8.275 -16.345  1.00 28.79           C  
ATOM   2891  O   VAL B 440      29.554  -8.912 -15.874  1.00 29.66           O  
ATOM   2892  CB  VAL B 440      26.711  -7.324 -14.916  1.00 28.84           C  
ATOM   2893  CG1 VAL B 440      26.529  -8.711 -14.312  1.00 28.05           C  
ATOM   2894  CG2 VAL B 440      26.409  -6.238 -13.898  1.00 28.07           C  
ATOM   2895  N   ILE B 441      28.042  -8.515 -17.541  1.00 30.67           N  
ATOM   2896  CA  ILE B 441      28.448  -9.629 -18.465  1.00 31.82           C  
ATOM   2897  C   ILE B 441      29.946  -9.526 -18.825  1.00 31.95           C  
ATOM   2898  O   ILE B 441      30.611 -10.562 -18.782  1.00 32.22           O  
ATOM   2899  CB  ILE B 441      27.564  -9.712 -19.735  1.00 30.07           C  
ATOM   2900  CG1 ILE B 441      26.090  -9.970 -19.391  1.00 31.88           C  
ATOM   2901  CG2 ILE B 441      28.131 -10.772 -20.686  1.00 27.89           C  
ATOM   2902  CD1 ILE B 441      25.132 -10.032 -20.579  1.00 30.30           C  
ATOM   2903  N   ALA B 442      30.461  -8.338 -19.144  1.00 31.15           N  
ATOM   2904  CA  ALA B 442      31.909  -8.086 -19.401  1.00 36.62           C  
ATOM   2905  C   ALA B 442      32.757  -8.499 -18.180  1.00 40.49           C  
ATOM   2906  O   ALA B 442      33.747  -9.240 -18.341  1.00 36.51           O  
ATOM   2907  CB  ALA B 442      32.143  -6.635 -19.772  1.00 33.60           C  
ATOM   2908  N   LYS B 443      32.366  -8.098 -16.969  1.00 47.99           N  
ATOM   2909  CA  LYS B 443      33.134  -8.432 -15.743  1.00 43.35           C  
ATOM   2910  C   LYS B 443      33.166  -9.955 -15.597  1.00 41.27           C  
ATOM   2911  O   LYS B 443      33.933 -10.450 -14.756  1.00 46.01           O  
ATOM   2912  CB  LYS B 443      32.564  -7.677 -14.536  1.00 45.66           C  
ATOM   2913  CG  LYS B 443      32.926  -6.199 -14.499  1.00 44.41           C  
ATOM   2914  N   SER B 444      32.407 -10.698 -16.405  1.00 40.34           N  
ATOM   2915  CA  SER B 444      32.489 -12.184 -16.418  1.00 40.32           C  
ATOM   2916  C   SER B 444      33.764 -12.628 -17.149  1.00 45.63           C  
ATOM   2917  O   SER B 444      34.226 -13.756 -16.905  1.00 43.79           O  
ATOM   2918  CB  SER B 444      31.279 -12.794 -17.055  1.00 38.45           C  
ATOM   2919  OG  SER B 444      31.493 -12.932 -18.447  1.00 36.60           O  
ATOM   2920  N   GLY B 445      34.240 -11.802 -18.089  1.00 51.06           N  
ATOM   2921  CA  GLY B 445      35.529 -11.954 -18.792  1.00 48.88           C  
ATOM   2922  C   GLY B 445      35.491 -12.945 -19.948  1.00 50.95           C  
ATOM   2923  O   GLY B 445      36.572 -13.204 -20.506  1.00 53.60           O  
ATOM   2924  N   ILE B 446      34.325 -13.495 -20.314  1.00 46.63           N  
ATOM   2925  CA  ILE B 446      34.180 -14.349 -21.535  1.00 40.77           C  
ATOM   2926  C   ILE B 446      34.462 -13.453 -22.738  1.00 40.14           C  
ATOM   2927  O   ILE B 446      34.490 -12.213 -22.532  1.00 39.18           O  
ATOM   2928  CB  ILE B 446      32.796 -15.034 -21.634  1.00 40.83           C  
ATOM   2929  CG1 ILE B 446      31.648 -14.022 -21.712  1.00 42.10           C  
ATOM   2930  CG2 ILE B 446      32.584 -16.022 -20.504  1.00 38.69           C  
ATOM   2931  CD1 ILE B 446      30.275 -14.647 -21.581  1.00 40.83           C  
ATOM   2932  N   SER B 447      34.668 -14.049 -23.928  1.00 40.25           N  
ATOM   2933  CA  SER B 447      34.956 -13.323 -25.200  1.00 38.45           C  
ATOM   2934  C   SER B 447      33.817 -12.339 -25.511  1.00 40.26           C  
ATOM   2935  O   SER B 447      32.678 -12.643 -25.094  1.00 42.68           O  
ATOM   2936  CB  SER B 447      35.161 -14.286 -26.337  1.00 38.82           C  
ATOM   2937  OG  SER B 447      33.954 -14.933 -26.722  1.00 35.83           O  
ATOM   2938  N   SER B 448      34.114 -11.214 -26.183  1.00 36.79           N  
ATOM   2939  CA  SER B 448      33.131 -10.218 -26.696  1.00 39.80           C  
ATOM   2940  C   SER B 448      31.995 -10.938 -27.439  1.00 41.58           C  
ATOM   2941  O   SER B 448      30.852 -10.512 -27.281  1.00 43.19           O  
ATOM   2942  CB  SER B 448      33.769  -9.169 -27.604  1.00 34.06           C  
ATOM   2943  N   GLN B 449      32.311 -11.969 -28.232  1.00 39.89           N  
ATOM   2944  CA  GLN B 449      31.319 -12.725 -29.036  1.00 43.90           C  
ATOM   2945  C   GLN B 449      30.369 -13.476 -28.101  1.00 40.70           C  
ATOM   2946  O   GLN B 449      29.162 -13.551 -28.415  1.00 39.40           O  
ATOM   2947  CB  GLN B 449      31.983 -13.703 -30.006  1.00 40.99           C  
ATOM   2948  CG  GLN B 449      31.034 -14.135 -31.115  1.00 40.71           C  
ATOM   2949  CD  GLN B 449      30.315 -15.407 -30.744  1.00 46.49           C  
ATOM   2950  OE1 GLN B 449      30.681 -16.079 -29.781  1.00 54.71           O  
ATOM   2951  NE2 GLN B 449      29.262 -15.738 -31.479  1.00 44.09           N  
ATOM   2952  N   GLN B 450      30.911 -14.024 -27.013  1.00 40.68           N  
ATOM   2953  CA  GLN B 450      30.137 -14.747 -25.975  1.00 36.69           C  
ATOM   2954  C   GLN B 450      29.381 -13.743 -25.086  1.00 30.10           C  
ATOM   2955  O   GLN B 450      28.416 -14.145 -24.483  1.00 30.53           O  
ATOM   2956  CB  GLN B 450      31.080 -15.653 -25.193  1.00 38.09           C  
ATOM   2957  CG  GLN B 450      31.426 -16.929 -25.939  1.00 42.12           C  
ATOM   2958  CD  GLN B 450      30.201 -17.720 -26.329  1.00 48.70           C  
ATOM   2959  OE1 GLN B 450      29.662 -18.505 -25.547  1.00 54.59           O  
ATOM   2960  NE2 GLN B 450      29.739 -17.506 -27.554  1.00 51.89           N  
ATOM   2961  N   GLN B 451      29.831 -12.496 -25.002  1.00 25.70           N  
ATOM   2962  CA  GLN B 451      29.170 -11.422 -24.239  1.00 26.33           C  
ATOM   2963  C   GLN B 451      27.882 -11.062 -24.977  1.00 26.56           C  
ATOM   2964  O   GLN B 451      26.841 -10.934 -24.311  1.00 27.33           O  
ATOM   2965  CB  GLN B 451      30.090 -10.217 -24.050  1.00 24.59           C  
ATOM   2966  CG  GLN B 451      31.230 -10.470 -23.055  1.00 24.81           C  
ATOM   2967  CD  GLN B 451      32.037  -9.218 -22.846  1.00 26.66           C  
ATOM   2968  OE1 GLN B 451      31.491  -8.125 -22.784  1.00 32.87           O  
ATOM   2969  NE2 GLN B 451      33.344  -9.357 -22.744  1.00 30.01           N  
ATOM   2970  N   SER B 452      27.977 -10.923 -26.293  1.00 27.87           N  
ATOM   2971  CA  SER B 452      26.849 -10.643 -27.223  1.00 29.48           C  
ATOM   2972  C   SER B 452      25.853 -11.783 -27.188  1.00 28.56           C  
ATOM   2973  O   SER B 452      24.680 -11.492 -27.051  1.00 31.86           O  
ATOM   2974  CB  SER B 452      27.337 -10.442 -28.599  1.00 29.55           C  
ATOM   2975  OG  SER B 452      28.073  -9.249 -28.633  1.00 31.28           O  
ATOM   2976  N   MET B 453      26.336 -13.025 -27.268  1.00 31.51           N  
ATOM   2977  CA  MET B 453      25.488 -14.247 -27.276  1.00 32.32           C  
ATOM   2978  C   MET B 453      24.722 -14.424 -25.964  1.00 30.64           C  
ATOM   2979  O   MET B 453      23.607 -14.938 -26.033  1.00 31.45           O  
ATOM   2980  CB  MET B 453      26.330 -15.503 -27.522  1.00 30.12           C  
ATOM   2981  CG  MET B 453      26.838 -15.566 -28.930  1.00 34.24           C  
ATOM   2982  SD  MET B 453      25.521 -15.466 -30.175  1.00 34.88           S  
ATOM   2983  CE  MET B 453      24.817 -17.108 -29.986  1.00 33.49           C  
ATOM   2984  N   ARG B 454      25.349 -14.118 -24.824  1.00 31.98           N  
ATOM   2985  CA  ARG B 454      24.773 -14.289 -23.467  1.00 29.01           C  
ATOM   2986  C   ARG B 454      23.718 -13.195 -23.283  1.00 27.92           C  
ATOM   2987  O   ARG B 454      22.653 -13.514 -22.793  1.00 29.07           O  
ATOM   2988  CB  ARG B 454      25.872 -14.213 -22.400  1.00 29.04           C  
ATOM   2989  CG  ARG B 454      25.353 -14.248 -20.970  1.00 28.68           C  
ATOM   2990  CD  ARG B 454      26.409 -14.343 -19.886  1.00 29.78           C  
ATOM   2991  NE  ARG B 454      25.783 -14.633 -18.596  1.00 31.23           N  
ATOM   2992  CZ  ARG B 454      25.342 -15.827 -18.217  1.00 31.98           C  
ATOM   2993  NH1 ARG B 454      24.779 -15.988 -17.028  1.00 33.11           N  
ATOM   2994  NH2 ARG B 454      25.511 -16.869 -19.007  1.00 29.28           N  
ATOM   2995  N   LEU B 455      24.040 -11.956 -23.661  1.00 26.23           N  
ATOM   2996  CA  LEU B 455      23.104 -10.803 -23.677  1.00 27.59           C  
ATOM   2997  C   LEU B 455      21.864 -11.160 -24.518  1.00 30.25           C  
ATOM   2998  O   LEU B 455      20.741 -10.833 -24.080  1.00 31.59           O  
ATOM   2999  CB  LEU B 455      23.794  -9.557 -24.242  1.00 25.87           C  
ATOM   3000  CG  LEU B 455      22.907  -8.318 -24.324  1.00 27.69           C  
ATOM   3001  CD1 LEU B 455      22.445  -7.883 -22.936  1.00 27.90           C  
ATOM   3002  CD2 LEU B 455      23.629  -7.172 -24.997  1.00 31.71           C  
ATOM   3003  N   ALA B 456      22.045 -11.789 -25.679  1.00 30.75           N  
ATOM   3004  CA  ALA B 456      20.930 -12.148 -26.591  1.00 31.72           C  
ATOM   3005  C   ALA B 456      20.090 -13.265 -25.963  1.00 31.41           C  
ATOM   3006  O   ALA B 456      18.888 -13.172 -26.075  1.00 29.34           O  
ATOM   3007  CB  ALA B 456      21.434 -12.569 -27.942  1.00 30.92           C  
ATOM   3008  N   ASN B 457      20.712 -14.279 -25.347  1.00 32.57           N  
ATOM   3009  CA  ASN B 457      19.995 -15.466 -24.810  1.00 33.47           C  
ATOM   3010  C   ASN B 457      19.197 -15.071 -23.562  1.00 36.15           C  
ATOM   3011  O   ASN B 457      18.201 -15.737 -23.301  1.00 36.36           O  
ATOM   3012  CB  ASN B 457      20.932 -16.605 -24.426  1.00 34.24           C  
ATOM   3013  CG  ASN B 457      21.484 -17.356 -25.615  1.00 37.83           C  
ATOM   3014  OD1 ASN B 457      20.780 -17.600 -26.581  1.00 42.17           O  
ATOM   3015  ND2 ASN B 457      22.753 -17.718 -25.552  1.00 40.10           N  
ATOM   3016  N   LEU B 458      19.701 -14.112 -22.771  1.00 34.59           N  
ATOM   3017  CA  LEU B 458      19.024 -13.575 -21.566  1.00 36.13           C  
ATOM   3018  C   LEU B 458      17.800 -12.772 -22.013  1.00 35.36           C  
ATOM   3019  O   LEU B 458      16.701 -13.029 -21.471  1.00 30.41           O  
ATOM   3020  CB  LEU B 458      19.958 -12.670 -20.760  1.00 36.10           C  
ATOM   3021  CG  LEU B 458      20.999 -13.356 -19.881  1.00 37.44           C  
ATOM   3022  CD1 LEU B 458      21.787 -12.294 -19.129  1.00 39.59           C  
ATOM   3023  CD2 LEU B 458      20.368 -14.338 -18.905  1.00 37.85           C  
ATOM   3024  N   LEU B 459      17.982 -11.842 -22.955  1.00 32.27           N  
ATOM   3025  CA  LEU B 459      16.861 -10.999 -23.459  1.00 34.59           C  
ATOM   3026  C   LEU B 459      15.792 -11.864 -24.148  1.00 30.42           C  
ATOM   3027  O   LEU B 459      14.631 -11.685 -23.807  1.00 29.61           O  
ATOM   3028  CB  LEU B 459      17.401  -9.885 -24.356  1.00 34.71           C  
ATOM   3029  CG  LEU B 459      18.379  -8.943 -23.644  1.00 39.44           C  
ATOM   3030  CD1 LEU B 459      18.748  -7.754 -24.538  1.00 36.07           C  
ATOM   3031  CD2 LEU B 459      17.814  -8.479 -22.292  1.00 40.79           C  
ATOM   3032  N   MET B 460      16.153 -12.826 -24.997  1.00 30.76           N  
ATOM   3033  CA  MET B 460      15.160 -13.716 -25.665  1.00 32.08           C  
ATOM   3034  C   MET B 460      14.417 -14.541 -24.609  1.00 36.13           C  
ATOM   3035  O   MET B 460      13.304 -14.937 -24.921  1.00 36.01           O  
ATOM   3036  CB  MET B 460      15.798 -14.656 -26.692  1.00 32.74           C  
ATOM   3037  CG  MET B 460      16.375 -13.939 -27.900  1.00 35.54           C  
ATOM   3038  SD  MET B 460      17.028 -15.040 -29.205  1.00 41.35           S  
ATOM   3039  CE  MET B 460      18.409 -15.799 -28.345  1.00 42.27           C  
ATOM   3040  N   LEU B 461      14.975 -14.759 -23.401  1.00 37.88           N  
ATOM   3041  CA  LEU B 461      14.272 -15.515 -22.319  1.00 38.14           C  
ATOM   3042  C   LEU B 461      13.178 -14.632 -21.697  1.00 39.01           C  
ATOM   3043  O   LEU B 461      12.119 -15.193 -21.278  1.00 40.88           O  
ATOM   3044  CB  LEU B 461      15.247 -16.073 -21.271  1.00 36.81           C  
ATOM   3045  CG  LEU B 461      15.428 -17.591 -21.301  1.00 34.90           C  
ATOM   3046  N   LEU B 462      13.365 -13.313 -21.698  1.00 37.63           N  
ATOM   3047  CA  LEU B 462      12.358 -12.342 -21.203  1.00 39.39           C  
ATOM   3048  C   LEU B 462      11.056 -12.475 -22.013  1.00 40.85           C  
ATOM   3049  O   LEU B 462      10.004 -12.318 -21.387  1.00 48.60           O  
ATOM   3050  CB  LEU B 462      12.923 -10.912 -21.230  1.00 40.31           C  
ATOM   3051  CG  LEU B 462      13.868 -10.553 -20.078  1.00 38.53           C  
ATOM   3052  N   SER B 463      11.088 -12.768 -23.323  1.00 37.99           N  
ATOM   3053  CA  SER B 463       9.859 -12.969 -24.143  1.00 36.98           C  
ATOM   3054  C   SER B 463       9.057 -14.135 -23.539  1.00 37.05           C  
ATOM   3055  O   SER B 463       7.826 -14.064 -23.590  1.00 32.18           O  
ATOM   3056  CB  SER B 463      10.118 -13.200 -25.625  1.00 32.64           C  
ATOM   3057  N   HIS B 464       9.733 -15.143 -22.964  1.00 36.19           N  
ATOM   3058  CA  HIS B 464       9.089 -16.329 -22.335  1.00 36.91           C  
ATOM   3059  C   HIS B 464       8.470 -15.949 -20.982  1.00 41.09           C  
ATOM   3060  O   HIS B 464       7.411 -16.527 -20.635  1.00 37.71           O  
ATOM   3061  CB  HIS B 464      10.072 -17.507 -22.221  1.00 35.56           C  
ATOM   3062  CG  HIS B 464      10.457 -18.014 -23.558  1.00 33.65           C  
ATOM   3063  ND1 HIS B 464       9.717 -18.950 -24.210  1.00 39.32           N  
ATOM   3064  CD2 HIS B 464      11.418 -17.622 -24.415  1.00 37.69           C  
ATOM   3065  CE1 HIS B 464      10.236 -19.174 -25.399  1.00 39.68           C  
ATOM   3066  NE2 HIS B 464      11.274 -18.358 -25.561  1.00 35.79           N  
ATOM   3067  N   VAL B 465       9.102 -15.034 -20.241  1.00 40.62           N  
ATOM   3068  CA  VAL B 465       8.541 -14.484 -18.976  1.00 44.80           C  
ATOM   3069  C   VAL B 465       7.254 -13.721 -19.319  1.00 43.88           C  
ATOM   3070  O   VAL B 465       6.237 -14.017 -18.691  1.00 55.14           O  
ATOM   3071  CB  VAL B 465       9.521 -13.570 -18.212  1.00 44.38           C  
ATOM   3072  CG1 VAL B 465       8.933 -13.188 -16.861  1.00 41.32           C  
ATOM   3073  CG2 VAL B 465      10.896 -14.202 -18.043  1.00 44.82           C  
ATOM   3074  N   ARG B 466       7.301 -12.790 -20.277  1.00 38.36           N  
ATOM   3075  CA  ARG B 466       6.139 -11.954 -20.672  1.00 36.79           C  
ATOM   3076  C   ARG B 466       5.019 -12.860 -21.190  1.00 36.60           C  
ATOM   3077  O   ARG B 466       3.855 -12.539 -20.984  1.00 37.61           O  
ATOM   3078  CB  ARG B 466       6.494 -10.920 -21.738  1.00 36.82           C  
ATOM   3079  CG  ARG B 466       5.276 -10.273 -22.390  1.00 38.26           C  
ATOM   3080  N   HIS B 467       5.338 -13.969 -21.838  1.00 35.02           N  
ATOM   3081  CA  HIS B 467       4.287 -14.889 -22.337  1.00 37.75           C  
ATOM   3082  C   HIS B 467       3.531 -15.488 -21.133  1.00 36.54           C  
ATOM   3083  O   HIS B 467       2.295 -15.400 -21.119  1.00 32.37           O  
ATOM   3084  CB  HIS B 467       4.873 -15.946 -23.274  1.00 37.71           C  
ATOM   3085  CG  HIS B 467       3.795 -16.661 -24.007  1.00 41.17           C  
ATOM   3086  ND1 HIS B 467       3.517 -17.996 -23.789  1.00 38.60           N  
ATOM   3087  CD2 HIS B 467       2.870 -16.206 -24.879  1.00 42.78           C  
ATOM   3088  CE1 HIS B 467       2.476 -18.342 -24.510  1.00 39.57           C  
ATOM   3089  NE2 HIS B 467       2.075 -17.266 -25.201  1.00 44.40           N  
ATOM   3090  N   ALA B 468       4.275 -16.031 -20.163  1.00 32.67           N  
ATOM   3091  CA  ALA B 468       3.796 -16.656 -18.914  1.00 35.50           C  
ATOM   3092  C   ALA B 468       2.917 -15.651 -18.163  1.00 37.86           C  
ATOM   3093  O   ALA B 468       1.861 -16.053 -17.622  1.00 43.69           O  
ATOM   3094  CB  ALA B 468       4.977 -17.095 -18.084  1.00 33.11           C  
ATOM   3095  N   SER B 469       3.348 -14.390 -18.156  1.00 38.31           N  
ATOM   3096  CA  SER B 469       2.668 -13.228 -17.531  1.00 38.55           C  
ATOM   3097  C   SER B 469       1.323 -12.957 -18.217  1.00 37.56           C  
ATOM   3098  O   SER B 469       0.370 -12.571 -17.514  1.00 36.56           O  
ATOM   3099  CB  SER B 469       3.573 -12.023 -17.594  1.00 41.56           C  
ATOM   3100  OG  SER B 469       2.825 -10.820 -17.488  1.00 50.56           O  
ATOM   3101  N   ASN B 470       1.238 -13.087 -19.542  1.00 34.98           N  
ATOM   3102  CA  ASN B 470      -0.030 -12.821 -20.279  1.00 40.33           C  
ATOM   3103  C   ASN B 470      -1.053 -13.911 -19.956  1.00 36.64           C  
ATOM   3104  O   ASN B 470      -2.210 -13.559 -19.805  1.00 31.70           O  
ATOM   3105  CB  ASN B 470       0.169 -12.680 -21.785  1.00 41.32           C  
ATOM   3106  CG  ASN B 470       0.845 -11.370 -22.103  1.00 44.77           C  
ATOM   3107  OD1 ASN B 470       0.480 -10.346 -21.544  1.00 56.97           O  
ATOM   3108  ND2 ASN B 470       1.849 -11.397 -22.957  1.00 48.77           N  
ATOM   3109  N   LYS B 471      -0.607 -15.159 -19.851  1.00 37.59           N  
ATOM   3110  CA  LYS B 471      -1.449 -16.356 -19.595  1.00 41.80           C  
ATOM   3111  C   LYS B 471      -1.970 -16.249 -18.159  1.00 45.32           C  
ATOM   3112  O   LYS B 471      -3.165 -16.449 -17.962  1.00 43.61           O  
ATOM   3113  CB  LYS B 471      -0.636 -17.641 -19.844  1.00 41.13           C  
ATOM   3114  CG  LYS B 471      -0.327 -17.940 -21.309  1.00 39.39           C  
ATOM   3115  N   GLY B 472      -1.089 -15.891 -17.211  1.00 47.46           N  
ATOM   3116  CA  GLY B 472      -1.424 -15.649 -15.790  1.00 42.71           C  
ATOM   3117  C   GLY B 472      -2.384 -14.475 -15.592  1.00 34.94           C  
ATOM   3118  O   GLY B 472      -3.271 -14.573 -14.737  1.00 35.25           O  
ATOM   3119  N   MET B 473      -2.206 -13.373 -16.306  1.00 31.52           N  
ATOM   3120  CA  MET B 473      -3.182 -12.255 -16.284  1.00 37.20           C  
ATOM   3121  C   MET B 473      -4.543 -12.745 -16.811  1.00 41.16           C  
ATOM   3122  O   MET B 473      -5.572 -12.406 -16.182  1.00 37.84           O  
ATOM   3123  CB  MET B 473      -2.727 -11.076 -17.136  1.00 36.73           C  
ATOM   3124  CG  MET B 473      -3.385  -9.799 -16.738  1.00 39.71           C  
ATOM   3125  SD  MET B 473      -2.614  -9.145 -15.255  1.00 51.08           S  
ATOM   3126  CE  MET B 473      -1.113  -8.469 -15.974  1.00 42.15           C  
ATOM   3127  N   GLU B 474      -4.555 -13.489 -17.924  1.00 41.61           N  
ATOM   3128  CA  GLU B 474      -5.797 -14.079 -18.489  1.00 45.53           C  
ATOM   3129  C   GLU B 474      -6.402 -15.029 -17.441  1.00 44.52           C  
ATOM   3130  O   GLU B 474      -7.618 -14.930 -17.183  1.00 38.64           O  
ATOM   3131  CB  GLU B 474      -5.507 -14.791 -19.809  1.00 54.13           C  
ATOM   3132  CG  GLU B 474      -6.470 -14.422 -20.934  1.00 59.56           C  
ATOM   3133  CD  GLU B 474      -6.462 -15.415 -22.085  1.00 63.19           C  
ATOM   3134  OE1 GLU B 474      -5.624 -16.351 -22.048  1.00 64.12           O  
ATOM   3135  OE2 GLU B 474      -7.285 -15.258 -23.015  1.00 67.98           O  
ATOM   3136  N   HIS B 475      -5.572 -15.863 -16.800  1.00 42.13           N  
ATOM   3137  CA  HIS B 475      -5.998 -16.818 -15.745  1.00 39.68           C  
ATOM   3138  C   HIS B 475      -6.627 -16.078 -14.549  1.00 40.94           C  
ATOM   3139  O   HIS B 475      -7.665 -16.513 -14.031  1.00 43.33           O  
ATOM   3140  CB  HIS B 475      -4.830 -17.660 -15.271  1.00 38.34           C  
ATOM   3141  CG  HIS B 475      -5.317 -18.823 -14.480  1.00 39.44           C  
ATOM   3142  ND1 HIS B 475      -5.493 -18.755 -13.112  1.00 40.92           N  
ATOM   3143  CD2 HIS B 475      -5.761 -20.034 -14.867  1.00 39.63           C  
ATOM   3144  CE1 HIS B 475      -5.976 -19.902 -12.678  1.00 42.02           C  
ATOM   3145  NE2 HIS B 475      -6.162 -20.701 -13.736  1.00 41.89           N  
ATOM   3146  N   LEU B 476      -5.992 -15.004 -14.112  1.00 37.59           N  
ATOM   3147  CA  LEU B 476      -6.450 -14.177 -12.982  1.00 39.80           C  
ATOM   3148  C   LEU B 476      -7.791 -13.528 -13.341  1.00 41.02           C  
ATOM   3149  O   LEU B 476      -8.689 -13.512 -12.458  1.00 33.85           O  
ATOM   3150  CB  LEU B 476      -5.395 -13.109 -12.684  1.00 38.35           C  
ATOM   3151  CG  LEU B 476      -5.704 -12.251 -11.471  1.00 37.38           C  
ATOM   3152  CD1 LEU B 476      -6.181 -13.135 -10.323  1.00 36.07           C  
ATOM   3153  CD2 LEU B 476      -4.496 -11.410 -11.069  1.00 39.66           C  
ATOM   3154  N   LEU B 477      -7.920 -12.973 -14.552  1.00 43.32           N  
ATOM   3155  CA  LEU B 477      -9.200 -12.340 -14.977  1.00 43.22           C  
ATOM   3156  C   LEU B 477     -10.271 -13.435 -15.107  1.00 42.41           C  
ATOM   3157  O   LEU B 477     -11.390 -13.174 -14.702  1.00 38.06           O  
ATOM   3158  CB  LEU B 477      -9.040 -11.515 -16.253  1.00 45.55           C  
ATOM   3159  CG  LEU B 477      -9.837 -10.200 -16.251  1.00 46.38           C  
ATOM   3160  N   ASN B 478      -9.923 -14.657 -15.520  1.00 44.81           N  
ATOM   3161  CA  ASN B 478     -10.886 -15.791 -15.556  1.00 43.62           C  
ATOM   3162  C   ASN B 478     -11.346 -16.118 -14.129  1.00 45.69           C  
ATOM   3163  O   ASN B 478     -12.563 -16.297 -13.948  1.00 37.08           O  
ATOM   3164  CB  ASN B 478     -10.312 -17.029 -16.250  1.00 43.95           C  
ATOM   3165  CG  ASN B 478     -10.393 -16.935 -17.759  1.00 43.26           C  
ATOM   3166  ND2 ASN B 478     -11.058 -15.890 -18.230  1.00 40.80           N  
ATOM   3167  N   MET B 479     -10.421 -16.172 -13.153  1.00 45.23           N  
ATOM   3168  CA  MET B 479     -10.728 -16.629 -11.764  1.00 42.54           C  
ATOM   3169  C   MET B 479     -11.555 -15.549 -11.049  1.00 40.66           C  
ATOM   3170  O   MET B 479     -12.519 -15.892 -10.391  1.00 41.85           O  
ATOM   3171  CB  MET B 479      -9.456 -16.967 -10.976  1.00 43.20           C  
ATOM   3172  CG  MET B 479      -8.680 -18.144 -11.556  1.00 41.66           C  
ATOM   3173  SD  MET B 479      -9.483 -19.729 -11.203  1.00 47.75           S  
ATOM   3174  CE  MET B 479      -9.521 -20.493 -12.823  1.00 48.42           C  
ATOM   3175  N   LYS B 480     -11.235 -14.280 -11.242  1.00 39.84           N  
ATOM   3176  CA  LYS B 480     -12.038 -13.150 -10.720  1.00 44.13           C  
ATOM   3177  C   LYS B 480     -13.482 -13.249 -11.240  1.00 47.40           C  
ATOM   3178  O   LYS B 480     -14.399 -13.086 -10.427  1.00 54.22           O  
ATOM   3179  CB  LYS B 480     -11.376 -11.831 -11.108  1.00 43.98           C  
ATOM   3180  CG  LYS B 480     -12.142 -10.597 -10.673  1.00 48.91           C  
ATOM   3181  CD  LYS B 480     -11.402  -9.323 -10.958  1.00 52.38           C  
ATOM   3182  CE  LYS B 480     -12.339  -8.223 -11.396  1.00 55.19           C  
ATOM   3183  NZ  LYS B 480     -13.428  -8.046 -10.408  1.00 61.88           N  
ATOM   3184  N   SER B 481     -13.677 -13.546 -12.528  1.00 48.39           N  
ATOM   3185  CA  SER B 481     -15.004 -13.650 -13.201  1.00 48.97           C  
ATOM   3186  C   SER B 481     -15.852 -14.782 -12.615  1.00 49.51           C  
ATOM   3187  O   SER B 481     -17.063 -14.598 -12.579  1.00 46.47           O  
ATOM   3188  CB  SER B 481     -14.861 -13.806 -14.688  1.00 45.54           C  
ATOM   3189  OG  SER B 481     -14.700 -12.528 -15.270  1.00 46.45           O  
ATOM   3190  N   LYS B 482     -15.242 -15.894 -12.189  1.00 54.10           N  
ATOM   3191  CA  LYS B 482     -15.939 -17.070 -11.599  1.00 57.14           C  
ATOM   3192  C   LYS B 482     -16.067 -16.930 -10.071  1.00 57.88           C  
ATOM   3193  O   LYS B 482     -16.162 -17.964  -9.399  1.00 60.19           O  
ATOM   3194  CB  LYS B 482     -15.166 -18.362 -11.879  1.00 58.52           C  
ATOM   3195  CG  LYS B 482     -15.196 -18.925 -13.292  1.00 58.30           C  
ATOM   3196  CD  LYS B 482     -14.241 -20.120 -13.362  1.00 57.43           C  
ATOM   3197  CE  LYS B 482     -14.062 -20.776 -14.712  1.00 56.18           C  
ATOM   3198  NZ  LYS B 482     -14.444 -19.883 -15.824  1.00 61.98           N  
ATOM   3199  N   ASN B 483     -16.070 -15.714  -9.525  1.00 62.01           N  
ATOM   3200  CA  ASN B 483     -16.242 -15.479  -8.069  1.00 65.19           C  
ATOM   3201  C   ASN B 483     -14.923 -15.787  -7.352  1.00 69.24           C  
ATOM   3202  O   ASN B 483     -14.414 -14.870  -6.689  1.00 85.08           O  
ATOM   3203  N   VAL B 484     -14.378 -17.003  -7.505  1.00 60.43           N  
ATOM   3204  CA  VAL B 484     -13.194 -17.526  -6.744  1.00 62.93           C  
ATOM   3205  C   VAL B 484     -12.356 -16.371  -6.159  1.00 65.16           C  
ATOM   3206  O   VAL B 484     -11.985 -16.448  -4.984  1.00 73.82           O  
ATOM   3207  CB  VAL B 484     -12.332 -18.474  -7.605  1.00 54.60           C  
ATOM   3208  N   VAL B 485     -12.055 -15.328  -6.926  1.00 70.35           N  
ATOM   3209  CA  VAL B 485     -11.103 -14.259  -6.501  1.00 77.28           C  
ATOM   3210  C   VAL B 485     -11.706 -13.455  -5.352  1.00 83.40           C  
ATOM   3211  O   VAL B 485     -12.841 -13.005  -5.442  1.00 93.65           O  
ATOM   3212  N   PRO B 486     -10.967 -13.237  -4.241  1.00 86.36           N  
ATOM   3213  CA  PRO B 486     -11.372 -12.279  -3.213  1.00 92.20           C  
ATOM   3214  C   PRO B 486     -11.326 -10.823  -3.701  1.00 93.56           C  
ATOM   3215  O   PRO B 486     -10.878 -10.597  -4.824  1.00 80.93           O  
ATOM   3216  CB  PRO B 486     -10.342 -12.459  -2.080  1.00 89.78           C  
ATOM   3217  CG  PRO B 486      -9.668 -13.784  -2.368  1.00 90.07           C  
ATOM   3218  CD  PRO B 486      -9.736 -13.947  -3.874  1.00 91.57           C  
ATOM   3219  N   VAL B 487     -11.793  -9.896  -2.846  1.00 91.96           N  
ATOM   3220  CA  VAL B 487     -11.706  -8.414  -3.024  1.00 83.90           C  
ATOM   3221  C   VAL B 487     -10.325  -7.980  -2.517  1.00 80.96           C  
ATOM   3222  O   VAL B 487     -10.068  -8.175  -1.315  1.00 78.23           O  
ATOM   3223  N   TYR B 488      -9.466  -7.459  -3.405  1.00 69.76           N  
ATOM   3224  CA  TYR B 488      -8.029  -7.190  -3.130  1.00 61.70           C  
ATOM   3225  C   TYR B 488      -7.626  -5.857  -3.760  1.00 59.05           C  
ATOM   3226  O   TYR B 488      -7.207  -5.860  -4.916  1.00 65.20           O  
ATOM   3227  N   ASP B 489      -7.700  -4.775  -2.983  1.00 55.10           N  
ATOM   3228  CA  ASP B 489      -7.473  -3.367  -3.407  1.00 52.20           C  
ATOM   3229  C   ASP B 489      -6.424  -3.278  -4.519  1.00 42.46           C  
ATOM   3230  O   ASP B 489      -6.808  -3.057  -5.692  1.00 44.67           O  
ATOM   3231  N   LEU B 490      -5.143  -3.368  -4.184  1.00 42.34           N  
ATOM   3232  CA  LEU B 490      -4.093  -3.030  -5.185  1.00 45.61           C  
ATOM   3233  C   LEU B 490      -4.186  -4.036  -6.334  1.00 38.23           C  
ATOM   3234  O   LEU B 490      -4.263  -3.603  -7.487  1.00 35.66           O  
ATOM   3235  CB  LEU B 490      -2.690  -3.012  -4.569  1.00 47.72           C  
ATOM   3236  CG  LEU B 490      -1.679  -2.120  -5.299  1.00 42.91           C  
ATOM   3237  N   LEU B 491      -4.245  -5.327  -6.017  1.00 36.07           N  
ATOM   3238  CA  LEU B 491      -4.258  -6.405  -7.041  1.00 36.23           C  
ATOM   3239  C   LEU B 491      -5.385  -6.138  -8.036  1.00 36.43           C  
ATOM   3240  O   LEU B 491      -5.137  -6.177  -9.245  1.00 35.20           O  
ATOM   3241  CB  LEU B 491      -4.457  -7.764  -6.382  1.00 36.68           C  
ATOM   3242  CG  LEU B 491      -4.332  -8.923  -7.362  1.00 39.10           C  
ATOM   3243  CD1 LEU B 491      -2.949  -8.893  -8.013  1.00 40.87           C  
ATOM   3244  CD2 LEU B 491      -4.603 -10.271  -6.698  1.00 35.33           C  
ATOM   3245  N   LEU B 492      -6.583  -5.877  -7.520  1.00 40.44           N  
ATOM   3246  CA  LEU B 492      -7.793  -5.614  -8.332  1.00 42.68           C  
ATOM   3247  C   LEU B 492      -7.522  -4.387  -9.195  1.00 42.70           C  
ATOM   3248  O   LEU B 492      -7.750  -4.453 -10.425  1.00 39.96           O  
ATOM   3249  CB  LEU B 492      -9.000  -5.404  -7.413  1.00 43.96           C  
ATOM   3250  CG  LEU B 492     -10.301  -5.088  -8.151  1.00 51.80           C  
ATOM   3251  CD1 LEU B 492     -10.653  -6.205  -9.130  1.00 53.59           C  
ATOM   3252  CD2 LEU B 492     -11.444  -4.843  -7.172  1.00 54.95           C  
ATOM   3253  N   GLU B 493      -7.024  -3.317  -8.576  1.00 44.46           N  
ATOM   3254  CA  GLU B 493      -6.763  -2.065  -9.318  1.00 46.37           C  
ATOM   3255  C   GLU B 493      -5.810  -2.397 -10.464  1.00 44.28           C  
ATOM   3256  O   GLU B 493      -6.054  -1.965 -11.589  1.00 48.20           O  
ATOM   3257  CB  GLU B 493      -6.214  -0.991  -8.393  1.00 51.96           C  
ATOM   3258  CG  GLU B 493      -6.177   0.358  -9.064  1.00 57.96           C  
ATOM   3259  CD  GLU B 493      -5.626   1.455  -8.181  1.00 63.97           C  
ATOM   3260  OE1 GLU B 493      -4.767   2.238  -8.672  1.00 58.15           O  
ATOM   3261  OE2 GLU B 493      -6.092   1.545  -7.019  1.00 67.51           O  
ATOM   3262  N   MET B 494      -4.799  -3.210 -10.174  1.00 47.79           N  
ATOM   3263  CA  MET B 494      -3.729  -3.599 -11.126  1.00 42.45           C  
ATOM   3264  C   MET B 494      -4.280  -4.540 -12.193  1.00 40.74           C  
ATOM   3265  O   MET B 494      -3.866  -4.383 -13.332  1.00 41.81           O  
ATOM   3266  CB  MET B 494      -2.575  -4.280 -10.391  1.00 44.74           C  
ATOM   3267  CG  MET B 494      -1.859  -3.361  -9.432  1.00 46.02           C  
ATOM   3268  SD  MET B 494      -1.211  -1.914 -10.274  1.00 52.71           S  
ATOM   3269  N   LEU B 495      -5.152  -5.497 -11.858  1.00 41.21           N  
ATOM   3270  CA  LEU B 495      -5.729  -6.422 -12.876  1.00 43.06           C  
ATOM   3271  C   LEU B 495      -6.592  -5.600 -13.844  1.00 45.50           C  
ATOM   3272  O   LEU B 495      -6.380  -5.723 -15.051  1.00 50.06           O  
ATOM   3273  CB  LEU B 495      -6.536  -7.541 -12.206  1.00 44.96           C  
ATOM   3274  CG  LEU B 495      -6.935  -8.694 -13.125  1.00 47.25           C  
ATOM   3275  N   ASN B 496      -7.478  -4.743 -13.331  1.00 46.71           N  
ATOM   3276  CA  ASN B 496      -8.408  -3.908 -14.142  1.00 48.84           C  
ATOM   3277  C   ASN B 496      -7.639  -3.037 -15.129  1.00 51.19           C  
ATOM   3278  O   ASN B 496      -8.245  -2.617 -16.131  1.00 49.74           O  
ATOM   3279  CB  ASN B 496      -9.291  -2.999 -13.285  1.00 51.99           C  
ATOM   3280  CG  ASN B 496     -10.383  -3.768 -12.580  1.00 51.80           C  
ATOM   3281  OD1 ASN B 496     -10.637  -4.918 -12.914  1.00 54.02           O  
ATOM   3282  ND2 ASN B 496     -11.028  -3.150 -11.605  1.00 57.85           N  
ATOM   3283  N   ALA B 497      -6.358  -2.782 -14.894  1.00 51.09           N  
ATOM   3284  CA  ALA B 497      -5.495  -2.168 -15.928  1.00 53.92           C  
ATOM   3285  C   ALA B 497      -5.415  -3.039 -17.200  1.00 57.21           C  
ATOM   3286  O   ALA B 497      -5.642  -4.299 -17.178  1.00 47.80           O  
ATOM   3287  CB  ALA B 497      -4.130  -1.909 -15.355  1.00 57.95           C  
ATOM   3288  N   HIS B 498      -5.077  -2.378 -18.304  1.00 64.74           N  
TER    3289      HIS B 498                                                      
ATOM   3290  N   SER C 603      -9.748 -29.411 -42.623  1.00 56.42           N  
ATOM   3291  CA  SER C 603      -8.846 -28.267 -43.065  1.00 62.48           C  
ATOM   3292  C   SER C 603      -7.472 -28.325 -42.366  1.00 56.30           C  
ATOM   3293  O   SER C 603      -7.387 -27.992 -41.148  1.00 50.04           O  
ATOM   3294  CB  SER C 603      -9.490 -26.922 -42.858  1.00 61.56           C  
ATOM   3295  OG  SER C 603      -8.551 -25.888 -43.128  1.00 64.12           O  
ATOM   3296  N   HIS C 604      -6.443 -28.678 -43.149  1.00 51.02           N  
ATOM   3297  CA  HIS C 604      -5.048 -28.984 -42.733  1.00 44.94           C  
ATOM   3298  C   HIS C 604      -4.061 -28.404 -43.775  1.00 39.87           C  
ATOM   3299  O   HIS C 604      -3.098 -29.089 -44.139  1.00 34.84           O  
ATOM   3300  CB  HIS C 604      -4.928 -30.502 -42.514  1.00 42.89           C  
ATOM   3301  N   LYS C 605      -4.312 -27.183 -44.265  1.00 38.60           N  
ATOM   3302  CA  LYS C 605      -3.485 -26.519 -45.317  1.00 34.12           C  
ATOM   3303  C   LYS C 605      -2.064 -26.249 -44.789  1.00 30.90           C  
ATOM   3304  O   LYS C 605      -1.147 -26.314 -45.600  1.00 32.00           O  
ATOM   3305  CB  LYS C 605      -4.172 -25.257 -45.855  1.00 31.81           C  
ATOM   3306  N   LEU C 606      -1.870 -25.979 -43.496  1.00 30.96           N  
ATOM   3307  CA  LEU C 606      -0.517 -25.723 -42.902  1.00 34.07           C  
ATOM   3308  C   LEU C 606       0.385 -26.969 -43.072  1.00 33.83           C  
ATOM   3309  O   LEU C 606       1.506 -26.865 -43.647  1.00 30.07           O  
ATOM   3310  CB  LEU C 606      -0.663 -25.336 -41.423  1.00 32.52           C  
ATOM   3311  CG  LEU C 606       0.652 -25.225 -40.658  1.00 36.83           C  
ATOM   3312  CD1 LEU C 606       1.465 -24.071 -41.200  1.00 39.99           C  
ATOM   3313  CD2 LEU C 606       0.452 -25.059 -39.170  1.00 35.53           C  
ATOM   3314  N   VAL C 607      -0.068 -28.124 -42.585  1.00 37.00           N  
ATOM   3315  CA  VAL C 607       0.714 -29.393 -42.653  1.00 39.15           C  
ATOM   3316  C   VAL C 607       0.951 -29.737 -44.124  1.00 39.43           C  
ATOM   3317  O   VAL C 607       2.061 -30.182 -44.457  1.00 44.97           O  
ATOM   3318  CB  VAL C 607       0.026 -30.530 -41.874  1.00 42.27           C  
ATOM   3319  CG1 VAL C 607       0.465 -31.904 -42.365  1.00 47.63           C  
ATOM   3320  CG2 VAL C 607       0.292 -30.414 -40.383  1.00 44.96           C  
ATOM   3321  N   GLN C 608      -0.049 -29.499 -44.972  1.00 40.20           N  
ATOM   3322  CA  GLN C 608      -0.020 -29.762 -46.435  1.00 40.87           C  
ATOM   3323  C   GLN C 608       1.092 -28.904 -47.074  1.00 38.86           C  
ATOM   3324  O   GLN C 608       1.981 -29.474 -47.732  1.00 37.52           O  
ATOM   3325  CB  GLN C 608      -1.443 -29.486 -46.931  1.00 43.27           C  
ATOM   3326  CG  GLN C 608      -1.760 -29.902 -48.350  1.00 46.02           C  
ATOM   3327  CD  GLN C 608      -3.139 -29.409 -48.742  1.00 48.58           C  
ATOM   3328  OE1 GLN C 608      -3.313 -28.645 -49.679  1.00 52.86           O  
ATOM   3329  NE2 GLN C 608      -4.145 -29.795 -47.983  1.00 54.92           N  
ATOM   3330  N   LEU C 609       1.092 -27.583 -46.846  1.00 34.36           N  
ATOM   3331  CA  LEU C 609       2.119 -26.659 -47.402  1.00 33.11           C  
ATOM   3332  C   LEU C 609       3.496 -27.002 -46.837  1.00 34.93           C  
ATOM   3333  O   LEU C 609       4.469 -26.776 -47.544  1.00 38.16           O  
ATOM   3334  CB  LEU C 609       1.737 -25.208 -47.100  1.00 34.06           C  
ATOM   3335  CG  LEU C 609       0.484 -24.736 -47.855  1.00 35.40           C  
ATOM   3336  CD1 LEU C 609      -0.106 -23.482 -47.232  1.00 34.54           C  
ATOM   3337  CD2 LEU C 609       0.806 -24.521 -49.321  1.00 33.84           C  
ATOM   3338  N   LEU C 610       3.577 -27.502 -45.607  1.00 36.61           N  
ATOM   3339  CA  LEU C 610       4.869 -27.883 -44.964  1.00 38.44           C  
ATOM   3340  C   LEU C 610       5.394 -29.174 -45.586  1.00 40.48           C  
ATOM   3341  O   LEU C 610       6.577 -29.422 -45.428  1.00 40.14           O  
ATOM   3342  CB  LEU C 610       4.690 -28.095 -43.458  1.00 36.53           C  
ATOM   3343  CG  LEU C 610       4.688 -26.842 -42.584  1.00 37.07           C  
ATOM   3344  CD1 LEU C 610       4.204 -27.175 -41.177  1.00 36.48           C  
ATOM   3345  CD2 LEU C 610       6.063 -26.179 -42.539  1.00 35.70           C  
ATOM   3346  N   THR C 611       4.548 -29.979 -46.240  1.00 44.41           N  
ATOM   3347  CA  THR C 611       4.953 -31.325 -46.719  1.00 44.29           C  
ATOM   3348  C   THR C 611       5.257 -31.340 -48.229  1.00 47.55           C  
ATOM   3349  O   THR C 611       5.737 -32.388 -48.680  1.00 61.71           O  
ATOM   3350  CB  THR C 611       3.968 -32.410 -46.255  1.00 48.49           C  
ATOM   3351  OG1 THR C 611       2.618 -31.987 -46.432  1.00 50.39           O  
ATOM   3352  CG2 THR C 611       4.184 -32.791 -44.805  1.00 46.94           C  
ATOM   3353  N   THR C 612       5.127 -30.243 -48.983  1.00 48.53           N  
ATOM   3354  CA  THR C 612       5.403 -30.261 -50.445  1.00 48.91           C  
ATOM   3355  C   THR C 612       5.890 -28.904 -50.947  1.00 53.08           C  
ATOM   3356  O   THR C 612       5.175 -27.960 -50.648  1.00 61.12           O  
ATOM   3357  CB  THR C 612       4.128 -30.595 -51.212  1.00 49.32           C  
ATOM   3358  OG1 THR C 612       3.235 -29.608 -50.709  1.00 45.41           O  
ATOM   3359  CG2 THR C 612       3.607 -32.000 -50.995  1.00 48.58           C  
TER    3360      THR C 612                                                      
ATOM   3361  N   HIS D 604      -6.365   4.475  -8.031  1.00 50.02           N  
ATOM   3362  CA  HIS D 604      -6.246   5.438  -6.911  1.00 46.27           C  
ATOM   3363  C   HIS D 604      -5.147   4.961  -5.951  1.00 44.97           C  
ATOM   3364  O   HIS D 604      -4.257   5.769  -5.651  1.00 47.04           O  
ATOM   3365  CB  HIS D 604      -7.619   5.642  -6.245  1.00 42.32           C  
ATOM   3366  N   LYS D 605      -5.204   3.690  -5.526  1.00 42.90           N  
ATOM   3367  CA  LYS D 605      -4.247   3.022  -4.601  1.00 41.58           C  
ATOM   3368  C   LYS D 605      -2.809   3.107  -5.137  1.00 40.21           C  
ATOM   3369  O   LYS D 605      -1.882   3.399  -4.344  1.00 41.25           O  
ATOM   3370  CB  LYS D 605      -4.669   1.566  -4.411  1.00 43.72           C  
ATOM   3371  CG  LYS D 605      -4.040   0.869  -3.214  1.00 56.48           C  
ATOM   3372  CD  LYS D 605      -4.458   1.461  -1.869  1.00 65.67           C  
ATOM   3373  CE  LYS D 605      -3.505   1.127  -0.739  1.00 68.93           C  
ATOM   3374  NZ  LYS D 605      -3.321   2.292   0.162  1.00 73.85           N  
ATOM   3375  N   LEU D 606      -2.622   2.851  -6.435  1.00 37.42           N  
ATOM   3376  CA  LEU D 606      -1.300   2.922  -7.101  1.00 36.37           C  
ATOM   3377  C   LEU D 606      -0.755   4.355  -6.998  1.00 36.05           C  
ATOM   3378  O   LEU D 606       0.402   4.530  -6.562  1.00 32.20           O  
ATOM   3379  CB  LEU D 606      -1.450   2.476  -8.557  1.00 36.26           C  
ATOM   3380  CG  LEU D 606      -0.136   2.338  -9.330  1.00 36.77           C  
ATOM   3381  CD2 LEU D 606      -0.408   1.840 -10.728  1.00 34.40           C  
ATOM   3382  N   VAL D 607      -1.578   5.349  -7.343  1.00 38.34           N  
ATOM   3383  CA  VAL D 607      -1.175   6.785  -7.342  1.00 37.49           C  
ATOM   3384  C   VAL D 607      -0.811   7.223  -5.911  1.00 37.74           C  
ATOM   3385  O   VAL D 607       0.231   7.938  -5.755  1.00 37.58           O  
ATOM   3386  CB  VAL D 607      -2.271   7.662  -7.974  1.00 37.51           C  
ATOM   3387  CG1 VAL D 607      -1.856   9.123  -7.999  1.00 37.58           C  
ATOM   3388  CG2 VAL D 607      -2.592   7.208  -9.389  1.00 36.93           C  
ATOM   3389  N   GLN D 608      -1.592   6.775  -4.915  1.00 36.99           N  
ATOM   3390  CA  GLN D 608      -1.404   7.056  -3.464  1.00 38.20           C  
ATOM   3391  C   GLN D 608      -0.053   6.516  -2.995  1.00 40.07           C  
ATOM   3392  O   GLN D 608       0.701   7.245  -2.269  1.00 38.70           O  
ATOM   3393  CB  GLN D 608      -2.443   6.346  -2.595  1.00 43.32           C  
ATOM   3394  CG  GLN D 608      -3.711   7.138  -2.317  1.00 48.72           C  
ATOM   3395  CD  GLN D 608      -4.816   6.242  -1.801  1.00 52.82           C  
ATOM   3396  OE1 GLN D 608      -5.987   6.445  -2.112  1.00 69.00           O  
ATOM   3397  NE2 GLN D 608      -4.459   5.206  -1.049  1.00 48.66           N  
ATOM   3398  N   LEU D 609       0.216   5.253  -3.303  1.00 36.07           N  
ATOM   3399  CA  LEU D 609       1.485   4.609  -2.875  1.00 40.42           C  
ATOM   3400  C   LEU D 609       2.653   5.266  -3.610  1.00 38.86           C  
ATOM   3401  O   LEU D 609       3.766   5.292  -3.030  1.00 37.46           O  
ATOM   3402  CB  LEU D 609       1.436   3.105  -3.154  1.00 40.46           C  
ATOM   3403  CG  LEU D 609       0.387   2.342  -2.347  1.00 42.96           C  
ATOM   3404  CD1 LEU D 609      -0.038   1.066  -3.069  1.00 43.24           C  
ATOM   3405  CD2 LEU D 609       0.901   2.028  -0.963  1.00 40.53           C  
ATOM   3406  N   LEU D 610       2.414   5.744  -4.840  1.00 40.86           N  
ATOM   3407  CA  LEU D 610       3.471   6.388  -5.672  1.00 38.79           C  
ATOM   3408  C   LEU D 610       3.837   7.760  -5.105  1.00 40.69           C  
ATOM   3409  O   LEU D 610       4.996   8.123  -5.234  1.00 38.01           O  
ATOM   3410  CB  LEU D 610       2.998   6.507  -7.119  1.00 36.09           C  
ATOM   3411  CG  LEU D 610       3.264   5.288  -7.994  1.00 33.90           C  
ATOM   3412  CD1 LEU D 610       2.610   5.461  -9.363  1.00 34.57           C  
ATOM   3413  CD2 LEU D 610       4.768   5.032  -8.118  1.00 32.85           C  
ATOM   3414  N   THR D 611       2.890   8.480  -4.489  1.00 43.95           N  
ATOM   3415  CA  THR D 611       3.027   9.935  -4.189  1.00 44.45           C  
ATOM   3416  C   THR D 611       2.809  10.237  -2.705  1.00 40.28           C  
ATOM   3417  O   THR D 611       3.333  11.249  -2.276  1.00 40.91           O  
ATOM   3418  CB  THR D 611       2.093  10.781  -5.074  1.00 43.21           C  
ATOM   3419  OG1 THR D 611       0.741  10.355  -4.913  1.00 40.21           O  
ATOM   3420  CG2 THR D 611       2.452  10.710  -6.544  1.00 42.26           C  
ATOM   3421  N   THR D 612       2.047   9.423  -1.970  1.00 41.53           N  
ATOM   3422  CA  THR D 612       1.637   9.684  -0.563  1.00 42.70           C  
ATOM   3423  C   THR D 612       2.409   8.779   0.417  1.00 47.06           C  
ATOM   3424  O   THR D 612       2.298   9.038   1.617  1.00 52.06           O  
ATOM   3425  CB  THR D 612       0.118   9.510  -0.391  1.00 36.19           C  
ATOM   3426  N   THR D 613       3.139   7.750  -0.037  1.00 49.29           N  
ATOM   3427  CA  THR D 613       3.698   6.674   0.839  1.00 54.89           C  
ATOM   3428  C   THR D 613       5.223   6.807   0.918  1.00 59.65           C  
ATOM   3429  O   THR D 613       5.847   7.059  -0.118  1.00 67.23           O  
ATOM   3430  CB  THR D 613       3.282   5.275   0.361  1.00 45.69           C  
TER    3431      THR D 613                                                      
HETATM 3432  C4  I1D A 601      -5.152  -8.288 -38.253  1.00 44.29           C  
HETATM 3433  C14 I1D A 601      -1.235  -8.262 -42.618  1.00 34.98           C  
HETATM 3434  C5  I1D A 601      -5.395  -7.704 -37.012  1.00 42.67           C  
HETATM 3435  C6  I1D A 601      -6.680  -7.590 -36.518  1.00 44.12           C  
HETATM 3436  C11 I1D A 601      -0.908  -7.342 -40.022  1.00 35.50           C  
HETATM 3437  C7  I1D A 601      -7.744  -8.046 -37.281  1.00 45.23           C  
HETATM 3438  C8  I1D A 601      -7.528  -8.618 -38.530  1.00 41.12           C  
HETATM 3439  C9  I1D A 601      -6.233  -8.713 -39.013  1.00 43.75           C  
HETATM 3440  C10 I1D A 601      -2.198  -7.519 -40.524  1.00 39.87           C  
HETATM 3441  C12 I1D A 601       0.207  -7.607 -40.803  1.00 34.27           C  
HETATM 3442  C13 I1D A 601       0.038  -8.052 -42.103  1.00 35.88           C  
HETATM 3443  N1  I1D A 601      -3.130  -5.117 -38.138  1.00 40.08           N  
HETATM 3444  C3  I1D A 601      -3.767  -8.407 -38.826  1.00 42.15           C  
HETATM 3445  C1  I1D A 601      -3.234  -6.031 -38.816  1.00 41.73           C  
HETATM 3446  C2  I1D A 601      -3.423  -7.223 -39.672  1.00 38.40           C  
HETATM 3447  O1  I1D A 601      -9.010  -7.916 -36.762  1.00 39.91           O  
HETATM 3448 CL1  I1D A 601      -5.967  -9.457 -40.584  1.00 45.06          CL  
HETATM 3449  O2  I1D A 601       1.134  -8.298 -42.861  1.00 33.13           O  
HETATM 3450  C15 I1D A 601      -2.338  -7.976 -41.831  1.00 35.61           C  
HETATM 3451  C4  I1D B 601      -1.195 -15.443 -10.599  1.00 46.82           C  
HETATM 3452  C14 I1D B 601       3.305 -14.124  -6.880  1.00 40.26           C  
HETATM 3453  C5  I1D B 601      -1.480 -16.158 -11.767  1.00 42.89           C  
HETATM 3454  C6  I1D B 601      -2.751 -16.656 -12.006  1.00 40.07           C  
HETATM 3455  C11 I1D B 601       3.356 -15.166  -9.428  1.00 38.12           C  
HETATM 3456  C7  I1D B 601      -3.763 -16.432 -11.088  1.00 43.11           C  
HETATM 3457  C8  I1D B 601      -3.509 -15.736  -9.917  1.00 45.55           C  
HETATM 3458  C9  I1D B 601      -2.230 -15.259  -9.688  1.00 47.28           C  
HETATM 3459  C10 I1D B 601       2.180 -15.264  -8.700  1.00 37.19           C  
HETATM 3460  C12 I1D B 601       4.488 -14.557  -8.906  1.00 41.00           C  
HETATM 3461  C13 I1D B 601       4.473 -14.045  -7.621  1.00 43.68           C  
HETATM 3462  N1  I1D B 601       1.272 -18.129 -10.550  1.00 42.84           N  
HETATM 3463  C3  I1D B 601       0.185 -14.935 -10.253  1.00 40.79           C  
HETATM 3464  C1  I1D B 601       1.140 -17.150  -9.988  1.00 38.69           C  
HETATM 3465  C2  I1D B 601       0.907 -15.878  -9.283  1.00 39.56           C  
HETATM 3466  O1  I1D B 601      -5.025 -16.911 -11.337  1.00 46.05           O  
HETATM 3467 CL1  I1D B 601      -1.944 -14.362  -8.230  1.00 43.50          CL  
HETATM 3468  O2  I1D B 601       5.607 -13.483  -7.090  1.00 40.80           O  
HETATM 3469  C15 I1D B 601       2.184 -14.736  -7.418  1.00 38.50           C  
HETATM 3470  O   HOH A 701      13.952 -13.711 -42.082  1.00 25.64           O  
HETATM 3471  O   HOH A 702       2.043 -14.548 -33.680  1.00 40.28           O  
HETATM 3472  O   HOH A 703      13.956 -13.913 -44.697  1.00 26.96           O  
HETATM 3473  O   HOH B 701      15.875  -4.962 -10.208  1.00 30.68           O  
HETATM 3474  O   HOH B 702       7.860 -12.133  -7.175  1.00 32.95           O  
HETATM 3475  O   HOH B 703      -1.200 -29.256   8.459  1.00 32.35           O  
HETATM 3476  O   HOH B 704      16.578  -4.695  -7.450  1.00 29.45           O  
HETATM 3477  O   HOH B 705      17.791 -18.138 -24.538  1.00 28.74           O  
HETATM 3478  O   HOH B 706      26.962  -8.054 -23.999  1.00 26.95           O  
HETATM 3479  O   HOH B 707       6.754  12.848 -10.171  1.00 39.52           O  
CONECT 3432 3434 3439 3444                                                      
CONECT 3433 3442 3450                                                           
CONECT 3434 3432 3435                                                           
CONECT 3435 3434 3437                                                           
CONECT 3436 3440 3441                                                           
CONECT 3437 3435 3438 3447                                                      
CONECT 3438 3437 3439                                                           
CONECT 3439 3432 3438 3448                                                      
CONECT 3440 3436 3446 3450                                                      
CONECT 3441 3436 3442                                                           
CONECT 3442 3433 3441 3449                                                      
CONECT 3443 3445                                                                
CONECT 3444 3432 3446                                                           
CONECT 3445 3443 3446                                                           
CONECT 3446 3440 3444 3445                                                      
CONECT 3447 3437                                                                
CONECT 3448 3439                                                                
CONECT 3449 3442                                                                
CONECT 3450 3433 3440                                                           
CONECT 3451 3453 3458 3463                                                      
CONECT 3452 3461 3469                                                           
CONECT 3453 3451 3454                                                           
CONECT 3454 3453 3456                                                           
CONECT 3455 3459 3460                                                           
CONECT 3456 3454 3457 3466                                                      
CONECT 3457 3456 3458                                                           
CONECT 3458 3451 3457 3467                                                      
CONECT 3459 3455 3465 3469                                                      
CONECT 3460 3455 3461                                                           
CONECT 3461 3452 3460 3468                                                      
CONECT 3462 3464                                                                
CONECT 3463 3451 3465                                                           
CONECT 3464 3462 3465                                                           
CONECT 3465 3459 3463 3464                                                      
CONECT 3466 3456                                                                
CONECT 3467 3458                                                                
CONECT 3468 3461                                                                
CONECT 3469 3452 3459                                                           
MASTER      417    0    2   22    4    0    0    6 3475    4   38   40          
END                                                                             
