# Supplementary material for: Isoliquiritigenin Inhibits the Growth of Colorectal Cancer Cells through the ESR2/PI3K/AKT Signalling Pathway
Source: Pharmaceuticals (Basel). 2023 Dec 27;17(1):43. doi: 10.3390/ph17010043 (PMC10820227; doi:10.3390/ph17010043)
Supplement: Supplementary file 1 [file pharmaceuticals-17-00043-s001.zip › crystal structures/ESR2/I1D.pdb]

HETATM    1 CL1  I1D A 601      -5.967  -9.457 -40.584  1.00 45.06          CL  
HETATM    2  C1  I1D A 601      -3.234  -6.031 -38.816  1.00 41.73           C  
HETATM    3  N1  I1D A 601      -3.130  -5.117 -38.138  1.00 40.08           N  
HETATM    4  O1  I1D A 601      -9.010  -7.916 -36.762  1.00 39.91           O  
HETATM    5  C2  I1D A 601      -3.423  -7.223 -39.672  1.00 38.40           C  
HETATM    6  O2  I1D A 601       1.134  -8.298 -42.861  1.00 33.13           O  
HETATM    7  C3  I1D A 601      -3.767  -8.407 -38.826  1.00 42.15           C  
HETATM    8  C4  I1D A 601      -5.152  -8.288 -38.253  1.00 44.29           C  
HETATM    9  C5  I1D A 601      -5.395  -7.704 -37.012  1.00 42.67           C  
HETATM   10  C6  I1D A 601      -6.680  -7.590 -36.518  1.00 44.12           C  
HETATM   11  C7  I1D A 601      -7.744  -8.046 -37.281  1.00 45.23           C  
HETATM   12  C8  I1D A 601      -7.528  -8.618 -38.530  1.00 41.12           C  
HETATM   13  C9  I1D A 601      -6.233  -8.713 -39.013  1.00 43.75           C  
HETATM   14  C10 I1D A 601      -2.198  -7.519 -40.524  1.00 39.87           C  
HETATM   15  C11 I1D A 601      -0.908  -7.342 -40.022  1.00 35.50           C  
HETATM   16  C12 I1D A 601       0.207  -7.607 -40.803  1.00 34.27           C  
HETATM   17  C13 I1D A 601       0.038  -8.052 -42.103  1.00 35.88           C  
HETATM   18  C14 I1D A 601      -1.235  -8.262 -42.618  1.00 34.98           C  
HETATM   19  C15 I1D A 601      -2.338  -7.976 -41.831  1.00 35.61           C  
CONECT    1   13
CONECT    2    3    5
CONECT    3    2
CONECT    4   11
CONECT    5    2    7   14
CONECT    6   17
CONECT    7    5    8
CONECT    8    7    9   13
CONECT    9    8   10
CONECT   10    9   11
CONECT   11    4   10   12
CONECT   12   11   13
CONECT   13    1    8   12
CONECT   14    5   15   19
CONECT   15   14   16
CONECT   16   15   17
CONECT   17    6   16   18
CONECT   18   17   19
CONECT   19   14   18
END
