# Supplementary material for: Isoliquiritigenin Inhibits the Growth of Colorectal Cancer Cells through the ESR2/PI3K/AKT Signalling Pathway
Source: Pharmaceuticals (Basel). 2023 Dec 27;17(1):43. doi: 10.3390/ph17010043 (PMC10820227; doi:10.3390/ph17010043)
Supplement: Supplementary file 1 [file pharmaceuticals-17-00043-s001.zip › crystal structures/GSK3a┬/3UO.pdb]

HETATM    1  C1  3UO B 401      -2.440   6.692  36.115  1.00 57.27           C  
HETATM    2  C2  3UO B 401      -2.054   5.373  35.926  1.00 49.30           C  
HETATM    3  C3  3UO B 401      -1.295   4.759  36.937  1.00 53.51           C  
HETATM    4  N4  3UO B 401      -0.908   5.395  38.052  1.00 54.95           N  
HETATM    5  C5  3UO B 401      -1.271   6.675  38.185  1.00 60.54           C  
HETATM    6  C6  3UO B 401      -2.024   7.365  37.258  1.00 61.39           C  
HETATM    7  C7  3UO B 401      -3.396   7.384  35.191  1.00 67.04           C  
HETATM    8  N8  3UO B 401      -0.852   3.427  36.903  1.00 50.46           N  
HETATM    9  N9  3UO B 401      -3.566   6.793  33.980  1.00 65.63           N  
HETATM   10  O10 3UO B 401      -3.998   8.398  35.548  1.00 71.48           O  
HETATM   11  C11 3UO B 401      -0.979   2.542  35.892  1.00 52.57           C  
HETATM   12  C12 3UO B 401      -0.617   1.120  36.249  1.00 54.76           C  
HETATM   13  O13 3UO B 401      -1.325   2.850  34.760  1.00 55.17           O  
HETATM   14  C14 3UO B 401      -1.406   0.007  35.602  1.00 56.22           C  
HETATM   15  C15 3UO B 401      -0.012   0.262  35.160  1.00 47.35           C  
HETATM   16  C16 3UO B 401      -4.404   7.214  32.923  1.00 61.06           C  
HETATM   17  C17 3UO B 401      -4.902   8.493  32.679  1.00 61.46           C  
HETATM   18  N18 3UO B 401      -5.656   8.844  31.632  1.00 64.84           N  
HETATM   19  C19 3UO B 401      -5.959   7.880  30.762  1.00 66.10           C  
HETATM   20  C20 3UO B 401      -5.532   6.571  30.888  1.00 75.58           C  
HETATM   21  C21 3UO B 401      -4.738   6.250  31.976  1.00 80.24           C  
HETATM   22  O22 3UO B 401      -4.136   5.035  32.163  1.00 96.63           O  
HETATM   23  C23 3UO B 401      -4.136   4.127  31.062  1.00 95.14           C  
CONECT    1    2    6    7
CONECT    2    1    3
CONECT    3    2    4    8
CONECT    4    3    5
CONECT    5    4    6
CONECT    6    1    5
CONECT    7    1    9   10
CONECT    8    3   11
CONECT    9    7   16
CONECT   10    7
CONECT   11    8   12   13
CONECT   12   11   14   15
CONECT   13   11
CONECT   14   12   15
CONECT   15   12   14
CONECT   16    9   17   21
CONECT   17   16   18
CONECT   18   17   19
CONECT   19   18   20
CONECT   20   19   21
CONECT   21   16   20   22
CONECT   22   21   23
CONECT   23   22
END
