# Supplementary material for: Isoliquiritigenin Inhibits the Growth of Colorectal Cancer Cells through the ESR2/PI3K/AKT Signalling Pathway
Source: Pharmaceuticals (Basel). 2023 Dec 27;17(1):43. doi: 10.3390/ph17010043 (PMC10820227; doi:10.3390/ph17010043)
Supplement: Supplementary file 1 [file pharmaceuticals-17-00043-s001.zip › crystal structures/GSK3a┬/5f94.pdb]

HEADER    TRANSFERASE/TRANSFERASE INHIBITOR       09-DEC-15   5F94              
TITLE     CRYSTAL STRUCTURE OF GSK3B IN COMPLEX WITH COMPOUND 15: 2-            
TITLE    2 [(CYCLOPROPYLCARBONYL)AMINO]-N-(4-METHOXYPYRIDIN-3-YL)PYRIDINE-4-    
TITLE    3 CARBOXAMIDE                                                          
COMPND    MOL_ID: 1;                                                            
COMPND   2 MOLECULE: GLYCOGEN SYNTHASE KINASE-3 BETA;                           
COMPND   3 CHAIN: A, B;                                                         
COMPND   4 SYNONYM: GSK-3 BETA,SERINE/THREONINE-PROTEIN KINASE GSK3B;           
COMPND   5 EC: 2.7.11.26,2.7.11.1;                                              
COMPND   6 ENGINEERED: YES                                                      
SOURCE    MOL_ID: 1;                                                            
SOURCE   2 ORGANISM_SCIENTIFIC: HOMO SAPIENS;                                   
SOURCE   3 ORGANISM_COMMON: HUMAN;                                              
SOURCE   4 ORGANISM_TAXID: 9606;                                                
SOURCE   5 GENE: GSK3B;                                                         
SOURCE   6 EXPRESSION_SYSTEM: UNIDENTIFIED BACULOVIRUS;                         
SOURCE   7 EXPRESSION_SYSTEM_TAXID: 10469                                       
KEYWDS    GSK3B, TRANSFERASE-TRANSFERASE INHIBITOR COMPLEX                      
EXPDTA    X-RAY DIFFRACTION                                                     
AUTHOR    H.A.LEWIS,K.KISH,G.LUO,G.M.DUBOWCHICK                                 
REVDAT   2   24-FEB-16 5F94    1       JRNL                                     
REVDAT   1   03-FEB-16 5F94    0                                                
JRNL        AUTH   G.LUO,L.CHEN,C.R.BURTON,H.XIAO,P.SIVAPRAKASAM,C.M.KRAUSE,    
JRNL        AUTH 2 Y.CAO,N.LIU,J.LIPPY,W.J.CLARKE,K.SNOW,J.RAYBON,V.ARORA,      
JRNL        AUTH 3 M.POKROSS,K.KISH,H.A.LEWIS,D.R.LANGLEY,J.E.MACOR,            
JRNL        AUTH 4 G.M.DUBOWCHIK                                                
JRNL        TITL   DISCOVERY OF ISONICOTINAMIDES AS HIGHLY SELECTIVE, BRAIN     
JRNL        TITL 2 PENETRABLE, AND ORALLY ACTIVE GLYCOGEN SYNTHASE KINASE-3     
JRNL        TITL 3 INHIBITORS.                                                  
JRNL        REF    J.MED.CHEM.                   V.  59  1041 2016              
JRNL        REFN                   ISSN 0022-2623                               
JRNL        PMID   26751161                                                     
JRNL        DOI    10.1021/ACS.JMEDCHEM.5B01550                                 
REMARK   2                                                                      
REMARK   2 RESOLUTION.    2.51 ANGSTROMS.                                       
REMARK   3                                                                      
REMARK   3 REFINEMENT.                                                          
REMARK   3   PROGRAM     : PHENIX 1.8.4_1496                                    
REMARK   3   AUTHORS     : PAUL ADAMS,PAVEL AFONINE,VINCENT CHEN,IAN            
REMARK   3               : DAVIS,KRESHNA GOPAL,RALF GROSSE-KUNSTLEVE,           
REMARK   3               : LI-WEI HUNG,ROBERT IMMORMINO,TOM IOERGER,            
REMARK   3               : AIRLIE MCCOY,ERIK MCKEE,NIGEL MORIARTY,              
REMARK   3               : REETAL PAI,RANDY READ,JANE RICHARDSON,               
REMARK   3               : DAVID RICHARDSON,TOD ROMO,JIM SACCHETTINI,           
REMARK   3               : NICHOLAS SAUTER,JACOB SMITH,LAURENT                  
REMARK   3               : STORONI,TOM TERWILLIGER,PETER ZWART                  
REMARK   3                                                                      
REMARK   3    REFINEMENT TARGET : ML                                            
REMARK   3                                                                      
REMARK   3  DATA USED IN REFINEMENT.                                            
REMARK   3   RESOLUTION RANGE HIGH (ANGSTROMS) : 2.51                           
REMARK   3   RESOLUTION RANGE LOW  (ANGSTROMS) : 44.34                          
REMARK   3   MIN(FOBS/SIGMA_FOBS)              : 1.340                          
REMARK   3   COMPLETENESS FOR RANGE        (%) : 99.7                           
REMARK   3   NUMBER OF REFLECTIONS             : 42491                          
REMARK   3                                                                      
REMARK   3  FIT TO DATA USED IN REFINEMENT.                                     
REMARK   3   R VALUE     (WORKING + TEST SET) : 0.191                           
REMARK   3   R VALUE            (WORKING SET) : 0.189                           
REMARK   3   FREE R VALUE                     : 0.226                           
REMARK   3   FREE R VALUE TEST SET SIZE   (%) : 5.050                           
REMARK   3   FREE R VALUE TEST SET COUNT      : 2146                            
REMARK   3                                                                      
REMARK   3  FIT TO DATA USED IN REFINEMENT (IN BINS).                           
REMARK   3   BIN  RESOLUTION RANGE  COMPL.    NWORK NFREE   RWORK  RFREE        
REMARK   3     1 44.3439 -  6.1846    1.00     2875   167  0.1640 0.1937        
REMARK   3     2  6.1846 -  4.9109    1.00     2742   153  0.1688 0.1841        
REMARK   3     3  4.9109 -  4.2907    1.00     2715   160  0.1354 0.1787        
REMARK   3     4  4.2907 -  3.8987    1.00     2693   152  0.1618 0.1966        
REMARK   3     5  3.8987 -  3.6194    1.00     2690   139  0.1706 0.2190        
REMARK   3     6  3.6194 -  3.4061    1.00     2740   112  0.2029 0.2626        
REMARK   3     7  3.4061 -  3.2355    1.00     2675   148  0.2223 0.2380        
REMARK   3     8  3.2355 -  3.0947    1.00     2654   125  0.2286 0.2866        
REMARK   3     9  3.0947 -  2.9756    1.00     2689   144  0.2263 0.2885        
REMARK   3    10  2.9756 -  2.8730    1.00     2643   135  0.2416 0.2869        
REMARK   3    11  2.8730 -  2.7831    1.00     2663   152  0.2383 0.2977        
REMARK   3    12  2.7831 -  2.7036    1.00     2658   133  0.2606 0.3020        
REMARK   3    13  2.7036 -  2.6324    0.99     2676   139  0.2655 0.3203        
REMARK   3    14  2.6324 -  2.5682    1.00     2624   145  0.2885 0.3155        
REMARK   3    15  2.5682 -  2.5098    0.99     2608   142  0.3017 0.3570        
REMARK   3                                                                      
REMARK   3  BULK SOLVENT MODELLING.                                             
REMARK   3   METHOD USED        : FLAT BULK SOLVENT MODEL                       
REMARK   3   SOLVENT RADIUS     : 1.11                                          
REMARK   3   SHRINKAGE RADIUS   : 0.90                                          
REMARK   3   K_SOL              : NULL                                          
REMARK   3   B_SOL              : NULL                                          
REMARK   3                                                                      
REMARK   3  ERROR ESTIMATES.                                                    
REMARK   3   COORDINATE ERROR (MAXIMUM-LIKELIHOOD BASED)     : 0.310            
REMARK   3   PHASE ERROR (DEGREES, MAXIMUM-LIKELIHOOD BASED) : 28.390           
REMARK   3                                                                      
REMARK   3  B VALUES.                                                           
REMARK   3   FROM WILSON PLOT           (A**2) : NULL                           
REMARK   3   MEAN B VALUE      (OVERALL, A**2) : NULL                           
REMARK   3   OVERALL ANISOTROPIC B VALUE.                                       
REMARK   3    B11 (A**2) : NULL                                                 
REMARK   3    B22 (A**2) : NULL                                                 
REMARK   3    B33 (A**2) : NULL                                                 
REMARK   3    B12 (A**2) : NULL                                                 
REMARK   3    B13 (A**2) : NULL                                                 
REMARK   3    B23 (A**2) : NULL                                                 
REMARK   3                                                                      
REMARK   3  TWINNING INFORMATION.                                               
REMARK   3   FRACTION: NULL                                                     
REMARK   3   OPERATOR: NULL                                                     
REMARK   3                                                                      
REMARK   3  DEVIATIONS FROM IDEAL VALUES.                                       
REMARK   3                 RMSD          COUNT                                  
REMARK   3   BOND      :  0.009           5422                                  
REMARK   3   ANGLE     :  1.193           7434                                  
REMARK   3   CHIRALITY :  0.047            865                                  
REMARK   3   PLANARITY :  0.007            987                                  
REMARK   3   DIHEDRAL  : 12.536           1943                                  
REMARK   3                                                                      
REMARK   3  TLS DETAILS                                                         
REMARK   3   NUMBER OF TLS GROUPS  : 8                                          
REMARK   3   TLS GROUP : 1                                                      
REMARK   3    SELECTION: CHAIN 'A' AND (RESID 36 THROUGH 154 )                  
REMARK   3    ORIGIN FOR THE GROUP (A): -26.2303 -20.0098   7.4753              
REMARK   3    T TENSOR                                                          
REMARK   3      T11:   0.3420 T22:   0.6780                                     
REMARK   3      T33:   0.3899 T12:   0.0462                                     
REMARK   3      T13:  -0.0244 T23:  -0.0341                                     
REMARK   3    L TENSOR                                                          
REMARK   3      L11:   2.6107 L22:   3.2704                                     
REMARK   3      L33:   2.3129 L12:   2.0369                                     
REMARK   3      L13:   0.2446 L23:   0.0824                                     
REMARK   3    S TENSOR                                                          
REMARK   3      S11:   0.0624 S12:  -0.2047 S13:  -0.2276                       
REMARK   3      S21:   0.1922 S22:  -0.0727 S23:  -0.0078                       
REMARK   3      S31:   0.1282 S32:  -0.3230 S33:  -0.0164                       
REMARK   3   TLS GROUP : 2                                                      
REMARK   3    SELECTION: CHAIN 'A' AND (RESID 155 THROUGH 273 )                 
REMARK   3    ORIGIN FOR THE GROUP (A): -18.7996  -0.5209   6.6998              
REMARK   3    T TENSOR                                                          
REMARK   3      T11:   0.4155 T22:   0.5738                                     
REMARK   3      T33:   0.3434 T12:   0.0699                                     
REMARK   3      T13:  -0.0395 T23:  -0.0088                                     
REMARK   3    L TENSOR                                                          
REMARK   3      L11:   1.4090 L22:   1.8178                                     
REMARK   3      L33:   2.8243 L12:   0.3761                                     
REMARK   3      L13:  -0.6735 L23:   0.7463                                     
REMARK   3    S TENSOR                                                          
REMARK   3      S11:   0.0123 S12:  -0.0516 S13:  -0.0270                       
REMARK   3      S21:   0.0448 S22:  -0.0908 S23:   0.0174                       
REMARK   3      S31:  -0.3299 S32:  -0.1483 S33:   0.0769                       
REMARK   3   TLS GROUP : 3                                                      
REMARK   3    SELECTION: CHAIN 'A' AND (RESID 274 THROUGH 292 )                 
REMARK   3    ORIGIN FOR THE GROUP (A): -21.1131  19.3908  14.1160              
REMARK   3    T TENSOR                                                          
REMARK   3      T11:   0.9488 T22:   0.7932                                     
REMARK   3      T33:   0.8781 T12:   0.1800                                     
REMARK   3      T13:  -0.2549 T23:   0.1148                                     
REMARK   3    L TENSOR                                                          
REMARK   3      L11:   6.1317 L22:   5.6312                                     
REMARK   3      L33:   6.3832 L12:  -1.4005                                     
REMARK   3      L13:  -3.5498 L23:  -0.6616                                     
REMARK   3    S TENSOR                                                          
REMARK   3      S11:  -0.7068 S12:  -0.0484 S13:   0.1716                       
REMARK   3      S21:  -0.4179 S22:   0.0880 S23:   0.6040                       
REMARK   3      S31:  -0.9963 S32:  -0.6941 S33:   0.4953                       
REMARK   3   TLS GROUP : 4                                                      
REMARK   3    SELECTION: CHAIN 'A' AND (RESID 293 THROUGH 381 )                 
REMARK   3    ORIGIN FOR THE GROUP (A): -12.7360   2.0047  -6.1462              
REMARK   3    T TENSOR                                                          
REMARK   3      T11:   0.5266 T22:   0.7064                                     
REMARK   3      T33:   0.3966 T12:  -0.0076                                     
REMARK   3      T13:  -0.0078 T23:   0.0787                                     
REMARK   3    L TENSOR                                                          
REMARK   3      L11:   2.0201 L22:   2.5489                                     
REMARK   3      L33:   3.9033 L12:  -0.4618                                     
REMARK   3      L13:  -0.5570 L23:   1.6676                                     
REMARK   3    S TENSOR                                                          
REMARK   3      S11:   0.0464 S12:   0.2681 S13:   0.0340                       
REMARK   3      S21:  -0.3967 S22:   0.0829 S23:  -0.1067                       
REMARK   3      S31:  -0.5880 S32:   0.2438 S33:  -0.1399                       
REMARK   3   TLS GROUP : 5                                                      
REMARK   3    SELECTION: CHAIN 'B' AND (RESID 37 THROUGH 154 )                  
REMARK   3    ORIGIN FOR THE GROUP (A):  -0.3099  11.1716  35.7136              
REMARK   3    T TENSOR                                                          
REMARK   3      T11:   0.4510 T22:   0.5921                                     
REMARK   3      T33:   0.3834 T12:  -0.0077                                     
REMARK   3      T13:  -0.0253 T23:  -0.0465                                     
REMARK   3    L TENSOR                                                          
REMARK   3      L11:   2.9911 L22:   2.9557                                     
REMARK   3      L33:   3.0536 L12:   1.3928                                     
REMARK   3      L13:  -1.1671 L23:   0.8042                                     
REMARK   3    S TENSOR                                                          
REMARK   3      S11:   0.1300 S12:  -0.1358 S13:  -0.0021                       
REMARK   3      S21:  -0.0886 S22:   0.0272 S23:  -0.3177                       
REMARK   3      S31:  -0.4244 S32:   0.4499 S33:  -0.1065                       
REMARK   3   TLS GROUP : 6                                                      
REMARK   3    SELECTION: CHAIN 'B' AND (RESID 155 THROUGH 252 )                 
REMARK   3    ORIGIN FOR THE GROUP (A): -17.9349   4.9464  36.5240              
REMARK   3    T TENSOR                                                          
REMARK   3      T11:   0.4892 T22:   0.5858                                     
REMARK   3      T33:   0.3542 T12:   0.0534                                     
REMARK   3      T13:  -0.0170 T23:  -0.0498                                     
REMARK   3    L TENSOR                                                          
REMARK   3      L11:   1.7870 L22:   2.1397                                     
REMARK   3      L33:   3.7749 L12:  -0.1410                                     
REMARK   3      L13:  -0.4251 L23:   0.0409                                     
REMARK   3    S TENSOR                                                          
REMARK   3      S11:  -0.1337 S12:  -0.0238 S13:   0.0703                       
REMARK   3      S21:  -0.0792 S22:   0.0895 S23:   0.0202                       
REMARK   3      S31:  -0.1711 S32:  -0.2781 S33:   0.0477                       
REMARK   3   TLS GROUP : 7                                                      
REMARK   3    SELECTION: CHAIN 'B' AND (RESID 253 THROUGH 292 )                 
REMARK   3    ORIGIN FOR THE GROUP (A): -30.9097  -2.6184  25.5266              
REMARK   3    T TENSOR                                                          
REMARK   3      T11:   0.4749 T22:   0.7773                                     
REMARK   3      T33:   0.5267 T12:  -0.0302                                     
REMARK   3      T13:  -0.0304 T23:  -0.1299                                     
REMARK   3    L TENSOR                                                          
REMARK   3      L11:   2.0008 L22:   5.3697                                     
REMARK   3      L33:   4.8505 L12:  -1.0445                                     
REMARK   3      L13:  -0.8530 L23:  -1.1246                                     
REMARK   3    S TENSOR                                                          
REMARK   3      S11:   0.0645 S12:   0.2302 S13:   0.1367                       
REMARK   3      S21:  -0.0427 S22:  -0.0671 S23:   0.5293                       
REMARK   3      S31:   0.3460 S32:  -0.3753 S33:  -0.0006                       
REMARK   3   TLS GROUP : 8                                                      
REMARK   3    SELECTION: CHAIN 'B' AND (RESID 293 THROUGH 385 )                 
REMARK   3    ORIGIN FOR THE GROUP (A): -23.2817  -1.3288  48.6562              
REMARK   3    T TENSOR                                                          
REMARK   3      T11:   0.5472 T22:   0.7251                                     
REMARK   3      T33:   0.4541 T12:   0.0979                                     
REMARK   3      T13:   0.0738 T23:   0.0192                                     
REMARK   3    L TENSOR                                                          
REMARK   3      L11:   1.5411 L22:   2.1000                                     
REMARK   3      L33:   5.5066 L12:   0.2517                                     
REMARK   3      L13:  -0.1416 L23:   0.1401                                     
REMARK   3    S TENSOR                                                          
REMARK   3      S11:  -0.0876 S12:  -0.4304 S13:  -0.1990                       
REMARK   3      S21:   0.4934 S22:   0.0733 S23:   0.0827                       
REMARK   3      S31:   0.4473 S32:  -0.3692 S33:   0.0212                       
REMARK   3                                                                      
REMARK   3  NCS DETAILS                                                         
REMARK   3   NUMBER OF NCS GROUPS : NULL                                        
REMARK   3                                                                      
REMARK   3  OTHER REFINEMENT REMARKS: NULL                                      
REMARK   4                                                                      
REMARK   4 5F94 COMPLIES WITH FORMAT V. 3.30, 13-JUL-11                         
REMARK 100                                                                      
REMARK 100 THIS ENTRY HAS BEEN PROCESSED BY RCSB ON 11-DEC-15.                  
REMARK 100 THE DEPOSITION ID IS D_1000216221.                                   
REMARK 200                                                                      
REMARK 200 EXPERIMENTAL DETAILS                                                 
REMARK 200  EXPERIMENT TYPE                : X-RAY DIFFRACTION                  
REMARK 200  DATE OF DATA COLLECTION        : 03-NOV-10                          
REMARK 200  TEMPERATURE           (KELVIN) : 100                                
REMARK 200  PH                             : NULL                               
REMARK 200  NUMBER OF CRYSTALS USED        : NULL                               
REMARK 200                                                                      
REMARK 200  SYNCHROTRON              (Y/N) : Y                                  
REMARK 200  RADIATION SOURCE               : APS                                
REMARK 200  BEAMLINE                       : 17-ID                              
REMARK 200  X-RAY GENERATOR MODEL          : NULL                               
REMARK 200  MONOCHROMATIC OR LAUE    (M/L) : M                                  
REMARK 200  WAVELENGTH OR RANGE        (A) : 1.00                               
REMARK 200  MONOCHROMATOR                  : NULL                               
REMARK 200  OPTICS                         : NULL                               
REMARK 200                                                                      
REMARK 200  DETECTOR TYPE                  : PIXEL                              
REMARK 200  DETECTOR MANUFACTURER          : DECTRIS PILATUS 6M                 
REMARK 200  INTENSITY-INTEGRATION SOFTWARE : XDS                                
REMARK 200  DATA SCALING SOFTWARE          : XDS                                
REMARK 200                                                                      
REMARK 200  NUMBER OF UNIQUE REFLECTIONS   : 42664                              
REMARK 200  RESOLUTION RANGE HIGH      (A) : 2.510                              
REMARK 200  RESOLUTION RANGE LOW       (A) : 177.350                            
REMARK 200  REJECTION CRITERIA  (SIGMA(I)) : NULL                               
REMARK 200                                                                      
REMARK 200 OVERALL.                                                             
REMARK 200  COMPLETENESS FOR RANGE     (%) : 99.9                               
REMARK 200  DATA REDUNDANCY                : 6.500                              
REMARK 200  R MERGE                    (I) : NULL                               
REMARK 200  R SYM                      (I) : NULL                               
REMARK 200  <I/SIGMA(I)> FOR THE DATA SET  : 12.7000                            
REMARK 200                                                                      
REMARK 200 IN THE HIGHEST RESOLUTION SHELL.                                     
REMARK 200  HIGHEST RESOLUTION SHELL, RANGE HIGH (A) : NULL                     
REMARK 200  HIGHEST RESOLUTION SHELL, RANGE LOW  (A) : NULL                     
REMARK 200  COMPLETENESS FOR SHELL     (%) : NULL                               
REMARK 200  DATA REDUNDANCY IN SHELL       : NULL                               
REMARK 200  R MERGE FOR SHELL          (I) : NULL                               
REMARK 200  R SYM FOR SHELL            (I) : NULL                               
REMARK 200  <I/SIGMA(I)> FOR SHELL         : NULL                               
REMARK 200                                                                      
REMARK 200 DIFFRACTION PROTOCOL: SINGLE WAVELENGTH                              
REMARK 200 METHOD USED TO DETERMINE THE STRUCTURE: MOLECULAR REPLACEMENT        
REMARK 200 SOFTWARE USED: PHASER                                                
REMARK 200 STARTING MODEL: NULL                                                 
REMARK 200                                                                      
REMARK 200 REMARK: NULL                                                         
REMARK 280                                                                      
REMARK 280 CRYSTAL                                                              
REMARK 280 SOLVENT CONTENT, VS   (%): 67.87                                     
REMARK 280 MATTHEWS COEFFICIENT, VM (ANGSTROMS**3/DA): 3.83                     
REMARK 280                                                                      
REMARK 280 CRYSTALLIZATION CONDITIONS: CRYSTALS GROWN IN THE PRESENCE OF 25%    
REMARK 280  PEG 1500 AND 0.1 M MMT PH 4.0, VAPOR DIFFUSION, TEMPERATURE 298K    
REMARK 290                                                                      
REMARK 290 CRYSTALLOGRAPHIC SYMMETRY                                            
REMARK 290 SYMMETRY OPERATORS FOR SPACE GROUP: P 21 21 21                       
REMARK 290                                                                      
REMARK 290      SYMOP   SYMMETRY                                                
REMARK 290     NNNMMM   OPERATOR                                                
REMARK 290       1555   X,Y,Z                                                   
REMARK 290       2555   -X+1/2,-Y,Z+1/2                                         
REMARK 290       3555   -X,Y+1/2,-Z+1/2                                         
REMARK 290       4555   X+1/2,-Y+1/2,-Z                                         
REMARK 290                                                                      
REMARK 290     WHERE NNN -> OPERATOR NUMBER                                     
REMARK 290           MMM -> TRANSLATION VECTOR                                  
REMARK 290                                                                      
REMARK 290 CRYSTALLOGRAPHIC SYMMETRY TRANSFORMATIONS                            
REMARK 290 THE FOLLOWING TRANSFORMATIONS OPERATE ON THE ATOM/HETATM             
REMARK 290 RECORDS IN THIS ENTRY TO PRODUCE CRYSTALLOGRAPHICALLY                
REMARK 290 RELATED MOLECULES.                                                   
REMARK 290   SMTRY1   1  1.000000  0.000000  0.000000        0.00000            
REMARK 290   SMTRY2   1  0.000000  1.000000  0.000000        0.00000            
REMARK 290   SMTRY3   1  0.000000  0.000000  1.000000        0.00000            
REMARK 290   SMTRY1   2 -1.000000  0.000000  0.000000       41.50000            
REMARK 290   SMTRY2   2  0.000000 -1.000000  0.000000        0.00000            
REMARK 290   SMTRY3   2  0.000000  0.000000  1.000000       88.67400            
REMARK 290   SMTRY1   3 -1.000000  0.000000  0.000000        0.00000            
REMARK 290   SMTRY2   3  0.000000  1.000000  0.000000       41.45500            
REMARK 290   SMTRY3   3  0.000000  0.000000 -1.000000       88.67400            
REMARK 290   SMTRY1   4  1.000000  0.000000  0.000000       41.50000            
REMARK 290   SMTRY2   4  0.000000 -1.000000  0.000000       41.45500            
REMARK 290   SMTRY3   4  0.000000  0.000000 -1.000000        0.00000            
REMARK 290                                                                      
REMARK 290 REMARK: NULL                                                         
REMARK 300                                                                      
REMARK 300 BIOMOLECULE: 1, 2                                                    
REMARK 300 SEE REMARK 350 FOR THE AUTHOR PROVIDED AND/OR PROGRAM                
REMARK 300 GENERATED ASSEMBLY INFORMATION FOR THE STRUCTURE IN                  
REMARK 300 THIS ENTRY. THE REMARK MAY ALSO PROVIDE INFORMATION ON               
REMARK 300 BURIED SURFACE AREA.                                                 
REMARK 350                                                                      
REMARK 350 COORDINATES FOR A COMPLETE MULTIMER REPRESENTING THE KNOWN           
REMARK 350 BIOLOGICALLY SIGNIFICANT OLIGOMERIZATION STATE OF THE                
REMARK 350 MOLECULE CAN BE GENERATED BY APPLYING BIOMT TRANSFORMATIONS          
REMARK 350 GIVEN BELOW.  BOTH NON-CRYSTALLOGRAPHIC AND                          
REMARK 350 CRYSTALLOGRAPHIC OPERATIONS ARE GIVEN.                               
REMARK 350                                                                      
REMARK 350 BIOMOLECULE: 1                                                       
REMARK 350 AUTHOR DETERMINED BIOLOGICAL UNIT: MONOMERIC                         
REMARK 350 SOFTWARE DETERMINED QUATERNARY STRUCTURE: MONOMERIC                  
REMARK 350 SOFTWARE USED: PISA                                                  
REMARK 350 APPLY THE FOLLOWING TO CHAINS: A                                     
REMARK 350   BIOMT1   1  1.000000  0.000000  0.000000        0.00000            
REMARK 350   BIOMT2   1  0.000000  1.000000  0.000000        0.00000            
REMARK 350   BIOMT3   1  0.000000  0.000000  1.000000        0.00000            
REMARK 350                                                                      
REMARK 350 BIOMOLECULE: 2                                                       
REMARK 350 AUTHOR DETERMINED BIOLOGICAL UNIT: MONOMERIC                         
REMARK 350 SOFTWARE DETERMINED QUATERNARY STRUCTURE: MONOMERIC                  
REMARK 350 SOFTWARE USED: PISA                                                  
REMARK 350 APPLY THE FOLLOWING TO CHAINS: B                                     
REMARK 350   BIOMT1   1  1.000000  0.000000  0.000000        0.00000            
REMARK 350   BIOMT2   1  0.000000  1.000000  0.000000        0.00000            
REMARK 350   BIOMT3   1  0.000000  0.000000  1.000000        0.00000            
REMARK 465                                                                      
REMARK 465 MISSING RESIDUES                                                     
REMARK 465 THE FOLLOWING RESIDUES WERE NOT LOCATED IN THE                       
REMARK 465 EXPERIMENT. (M=MODEL NUMBER; RES=RESIDUE NAME; C=CHAIN               
REMARK 465 IDENTIFIER; SSSEQ=SEQUENCE NUMBER; I=INSERTION CODE.)                
REMARK 465                                                                      
REMARK 465   M RES C SSSEQI                                                     
REMARK 465     ALA A   382                                                      
REMARK 465     ARG A   383                                                      
REMARK 465     ILE A   384                                                      
REMARK 465     GLN A   385                                                      
REMARK 465     LYS B    36                                                      
REMARK 470                                                                      
REMARK 470 MISSING ATOM                                                         
REMARK 470 THE FOLLOWING RESIDUES HAVE MISSING ATOMS (M=MODEL NUMBER;           
REMARK 470 RES=RESIDUE NAME; C=CHAIN IDENTIFIER; SSEQ=SEQUENCE NUMBER;          
REMARK 470 I=INSERTION CODE):                                                   
REMARK 470   M RES CSSEQI  ATOMS                                                
REMARK 470     LYS A  36    CB   CG   CD   CE   NZ                              
REMARK 470     GLN A  46    CG   CD   OE1  NE2                                  
REMARK 470     LYS A  60    CD   CE   NZ                                        
REMARK 470     LYS A  74    NZ                                                  
REMARK 470     ASP A  77    CG   OD1  OD2                                       
REMARK 470     GLU A  80    CG   CD   OE1  OE2                                  
REMARK 470     LEU A  88    CD1  CD2                                            
REMARK 470     ASP A  90    CB   CG   OD1  OD2                                  
REMARK 470     LYS A  91    CG   CD   CE   NZ                                   
REMARK 470     ARG A  92    CG   CD   NE   CZ   NH1  NH2                        
REMARK 470     PHE A  93    CG   CD1  CD2  CE1  CE2  CZ                         
REMARK 470     LYS A  94    CG   CD   CE   NZ                                   
REMARK 470     GLN A  99    OE1  NE2                                            
REMARK 470     LYS A 103    CE   NZ                                             
REMARK 470     ARG A 111    CZ   NH1  NH2                                       
REMARK 470     SER A 119    OG                                                  
REMARK 470     GLU A 121    CG   CD   OE1  OE2                                  
REMARK 470     LYS A 122    CG   CD   CE   NZ                                   
REMARK 470     LYS A 123    CG   CD   CE   NZ                                   
REMARK 470     GLU A 125    CG   CD   OE1  OE2                                  
REMARK 470     LYS A 150    CG   CD   CE   NZ                                   
REMARK 470     ARG A 209    CG   CD   NE   CZ   NH1  NH2                        
REMARK 470     GLU A 211    OE1  OE2                                            
REMARK 470     LYS A 271    CE   NZ                                             
REMARK 470     ARG A 278    CG   CD   NE   CZ   NH1  NH2                        
REMARK 470     GLU A 279    CG   CD   OE1  OE2                                  
REMARK 470     ARG A 282    CG   CD   NE   CZ   NH1  NH2                        
REMARK 470     GLU A 283    CG   CD   OE1  OE2                                  
REMARK 470     ASN A 285    CG   OD1  ND2                                       
REMARK 470     ASN A 287    CG   OD1  ND2                                       
REMARK 470     GLU A 290    CG   CD   OE1  OE2                                  
REMARK 470     LYS A 292    CG   CD   CE   NZ                                   
REMARK 470     LYS A 297    CG   CD   CE   NZ                                   
REMARK 470     HIS A 299    CG   ND1  CD2  CE1  NE2                             
REMARK 470     THR A 302    OG1  CG2                                            
REMARK 470     LYS A 303    CG   CD   CE   NZ                                   
REMARK 470     ARG A 306    NE   CZ   NH1  NH2                                  
REMARK 470     ARG A 308    CG   CD   NE   CZ   NH1  NH2                        
REMARK 470     GLU A 312    CD   OE1  OE2                                       
REMARK 470     VAL B  37    CG1  CG2                                            
REMARK 470     THR B  39    OG1  CG2                                            
REMARK 470     GLN B  46    CG   CD   OE1  NE2                                  
REMARK 470     ASP B  49    CG   OD1  OD2                                       
REMARK 470     ARG B  50    CG   CD   NE   CZ   NH1  NH2                        
REMARK 470     ASP B  58    CG   OD1  OD2                                       
REMARK 470     LYS B  60    CD   CE   NZ                                        
REMARK 470     LYS B  74    CE   NZ                                             
REMARK 470     ASP B  77    CG   OD1  OD2                                       
REMARK 470     GLU B  80    CG   CD   OE1  OE2                                  
REMARK 470     LEU B  88    CD1  CD2                                            
REMARK 470     ASP B  90    CB   CG   OD1  OD2                                  
REMARK 470     LYS B  91    CG   CD   CE   NZ                                   
REMARK 470     ARG B  92    CG   CD   NE   CZ   NH1  NH2                        
REMARK 470     PHE B  93    CG   CD1  CD2  CE1  CE2  CZ                         
REMARK 470     LYS B  94    CG   CD   CE   NZ                                   
REMARK 470     GLN B  99    CG   CD   OE1  NE2                                  
REMARK 470     LYS B 103    CD   CE   NZ                                        
REMARK 470     ARG B 111    CZ   NH1  NH2                                       
REMARK 470     ARG B 113    NH1  NH2                                            
REMARK 470     SER B 119    OG                                                  
REMARK 470     GLU B 121    CG   CD   OE1  OE2                                  
REMARK 470     LYS B 122    CG   CD   CE   NZ                                   
REMARK 470     LYS B 123    CG   CD   CE   NZ                                   
REMARK 470     ASP B 124    CG   OD1  OD2                                       
REMARK 470     GLU B 125    CG   CD   OE1  OE2                                  
REMARK 470     ASP B 133    CG   OD1  OD2                                       
REMARK 470     ARG B 148    CD   NE   CZ   NH1  NH2                             
REMARK 470     LYS B 150    CG   CD   CE   NZ                                   
REMARK 470     ARG B 209    CD   NE   CZ   NH1  NH2                             
REMARK 470     LYS B 271    CG   CD   CE   NZ                                   
REMARK 470     ARG B 278    CG   CD   NE   CZ   NH1  NH2                        
REMARK 470     GLU B 279    CG   CD   OE1  OE2                                  
REMARK 470     ARG B 282    CG   CD   NE   CZ   NH1  NH2                        
REMARK 470     GLU B 283    CG   CD   OE1  OE2                                  
REMARK 470     ASN B 285    CG   OD1  ND2                                       
REMARK 470     ASN B 287    CG   OD1  ND2                                       
REMARK 470     THR B 289    OG1  CG2                                            
REMARK 470     GLU B 290    OE1  OE2                                            
REMARK 470     PHE B 291    CG   CD1  CD2  CE1  CE2  CZ                         
REMARK 470     LYS B 292    CG   CD   CE   NZ                                   
REMARK 470     ILE B 296    CG1  CG2  CD1                                       
REMARK 470     LYS B 297    CG   CD   CE   NZ                                   
REMARK 470     HIS B 299    CG   ND1  CD2  CE1  NE2                             
REMARK 470     LYS B 303    CG   CD   CE   NZ                                   
REMARK 470     ARG B 306    CG   CD   NE   CZ   NH1  NH2                        
REMARK 470     ARG B 308    CG   CD   NE   CZ   NH1  NH2                        
REMARK 470     GLU B 322    OE1  OE2                                            
REMARK 470     LYS B 349    CG   CD   CE   NZ                                   
REMARK 470     ARG B 354    CG   CD   NE   CZ   NH1  NH2                        
REMARK 470     GLN B 385    CG   CD   OE1  NE2                                  
REMARK 500                                                                      
REMARK 500 GEOMETRY AND STEREOCHEMISTRY                                         
REMARK 500 SUBTOPIC: TORSION ANGLES                                             
REMARK 500                                                                      
REMARK 500 TORSION ANGLES OUTSIDE THE EXPECTED RAMACHANDRAN REGIONS:            
REMARK 500 (M=MODEL NUMBER; RES=RESIDUE NAME; C=CHAIN IDENTIFIER;               
REMARK 500 SSEQ=SEQUENCE NUMBER; I=INSERTION CODE).                             
REMARK 500                                                                      
REMARK 500 STANDARD TABLE:                                                      
REMARK 500 FORMAT:(10X,I3,1X,A3,1X,A1,I4,A1,4X,F7.2,3X,F7.2)                    
REMARK 500                                                                      
REMARK 500 EXPECTED VALUES: GJ KLEYWEGT AND TA JONES (1996). PHI/PSI-           
REMARK 500 CHOLOGY: RAMACHANDRAN REVISITED. STRUCTURE 4, 1395 - 1400            
REMARK 500                                                                      
REMARK 500  M RES CSSEQI        PSI       PHI                                   
REMARK 500    LYS A  91      -37.82   -175.23                                   
REMARK 500    SER A 119     -143.94   -101.88                                   
REMARK 500    GLU A 121      163.37     70.88                                   
REMARK 500    LYS A 122      -58.63     61.12                                   
REMARK 500    LYS A 123      128.61     64.88                                   
REMARK 500    ASP A 124      -26.12     76.03                                   
REMARK 500    ASP A 181       47.61   -144.89                                   
REMARK 500    ASP A 200       80.79     59.12                                   
REMARK 500    CYS A 218      148.67     77.27                                   
REMARK 500    ARG A 220      131.42    -36.24                                   
REMARK 500    TYR A 221      -29.34     89.58                                   
REMARK 500    MET A 284      -29.90   -145.89                                   
REMARK 500    PRO A 286       56.89    -67.66                                   
REMARK 500    ASN A 287       80.12     39.31                                   
REMARK 500    GLU A 290      -19.60     74.84                                   
REMARK 500    ALA A 298      108.44    -58.92                                   
REMARK 500    ASN A 361       52.05    -70.00                                   
REMARK 500    ASN A 370       69.44   -161.56                                   
REMARK 500    ASP B  49       77.24    -67.27                                   
REMARK 500    LYS B  91      -17.66    -44.12                                   
REMARK 500    ARG B  92      -74.03    -58.71                                   
REMARK 500    LYS B 122      -58.87   -159.02                                   
REMARK 500    LYS B 123      120.15     66.33                                   
REMARK 500    ASP B 124      -29.00     77.32                                   
REMARK 500    ASP B 181       46.29   -145.67                                   
REMARK 500    ASP B 200       82.54     60.13                                   
REMARK 500    CYS B 218      151.27     79.06                                   
REMARK 500    TYR B 221      -28.31     87.17                                   
REMARK 500    MET B 284      -35.32   -141.30                                   
REMARK 500    PRO B 286       55.77    -66.27                                   
REMARK 500    ASN B 287       97.59     45.90                                   
REMARK 500    TYR B 288       55.60   -106.91                                   
REMARK 500    PHE B 291       34.27    -70.56                                   
REMARK 500    LYS B 292       46.86    -98.16                                   
REMARK 500    ASN B 370       69.63   -160.81                                   
REMARK 500                                                                      
REMARK 500 REMARK: NULL                                                         
REMARK 800                                                                      
REMARK 800 SITE                                                                 
REMARK 800 SITE_IDENTIFIER: AC1                                                 
REMARK 800 EVIDENCE_CODE: SOFTWARE                                              
REMARK 800 SITE_DESCRIPTION: binding site for residue 3UO A 401                 
REMARK 800                                                                      
REMARK 800 SITE_IDENTIFIER: AC2                                                 
REMARK 800 EVIDENCE_CODE: SOFTWARE                                              
REMARK 800 SITE_DESCRIPTION: binding site for residue 3UO B 401                 
REMARK 900                                                                      
REMARK 900 RELATED ENTRIES                                                      
REMARK 900 RELATED ID: 5F95   RELATED DB: PDB                                   
DBREF  5F94 A   36   385  UNP    P49841   GSK3B_HUMAN     36    385             
DBREF  5F94 B   36   385  UNP    P49841   GSK3B_HUMAN     36    385             
SEQRES   1 A  350  LYS VAL THR THR VAL VAL ALA THR PRO GLY GLN GLY PRO          
SEQRES   2 A  350  ASP ARG PRO GLN GLU VAL SER TYR THR ASP THR LYS VAL          
SEQRES   3 A  350  ILE GLY ASN GLY SER PHE GLY VAL VAL TYR GLN ALA LYS          
SEQRES   4 A  350  LEU CYS ASP SER GLY GLU LEU VAL ALA ILE LYS LYS VAL          
SEQRES   5 A  350  LEU GLN ASP LYS ARG PHE LYS ASN ARG GLU LEU GLN ILE          
SEQRES   6 A  350  MET ARG LYS LEU ASP HIS CYS ASN ILE VAL ARG LEU ARG          
SEQRES   7 A  350  TYR PHE PHE TYR SER SER GLY GLU LYS LYS ASP GLU VAL          
SEQRES   8 A  350  TYR LEU ASN LEU VAL LEU ASP TYR VAL PRO GLU THR VAL          
SEQRES   9 A  350  TYR ARG VAL ALA ARG HIS TYR SER ARG ALA LYS GLN THR          
SEQRES  10 A  350  LEU PRO VAL ILE TYR VAL LYS LEU TYR MET TYR GLN LEU          
SEQRES  11 A  350  PHE ARG SER LEU ALA TYR ILE HIS SER PHE GLY ILE CYS          
SEQRES  12 A  350  HIS ARG ASP ILE LYS PRO GLN ASN LEU LEU LEU ASP PRO          
SEQRES  13 A  350  ASP THR ALA VAL LEU LYS LEU CYS ASP PHE GLY SER ALA          
SEQRES  14 A  350  LYS GLN LEU VAL ARG GLY GLU PRO ASN VAL SER TYR ILE          
SEQRES  15 A  350  CYS SER ARG TYR TYR ARG ALA PRO GLU LEU ILE PHE GLY          
SEQRES  16 A  350  ALA THR ASP TYR THR SER SER ILE ASP VAL TRP SER ALA          
SEQRES  17 A  350  GLY CYS VAL LEU ALA GLU LEU LEU LEU GLY GLN PRO ILE          
SEQRES  18 A  350  PHE PRO GLY ASP SER GLY VAL ASP GLN LEU VAL GLU ILE          
SEQRES  19 A  350  ILE LYS VAL LEU GLY THR PRO THR ARG GLU GLN ILE ARG          
SEQRES  20 A  350  GLU MET ASN PRO ASN TYR THR GLU PHE LYS PHE PRO GLN          
SEQRES  21 A  350  ILE LYS ALA HIS PRO TRP THR LYS VAL PHE ARG PRO ARG          
SEQRES  22 A  350  THR PRO PRO GLU ALA ILE ALA LEU CYS SER ARG LEU LEU          
SEQRES  23 A  350  GLU TYR THR PRO THR ALA ARG LEU THR PRO LEU GLU ALA          
SEQRES  24 A  350  CYS ALA HIS SER PHE PHE ASP GLU LEU ARG ASP PRO ASN          
SEQRES  25 A  350  VAL LYS LEU PRO ASN GLY ARG ASP THR PRO ALA LEU PHE          
SEQRES  26 A  350  ASN PHE THR THR GLN GLU LEU SER SER ASN PRO PRO LEU          
SEQRES  27 A  350  ALA THR ILE LEU ILE PRO PRO HIS ALA ARG ILE GLN              
SEQRES   1 B  350  LYS VAL THR THR VAL VAL ALA THR PRO GLY GLN GLY PRO          
SEQRES   2 B  350  ASP ARG PRO GLN GLU VAL SER TYR THR ASP THR LYS VAL          
SEQRES   3 B  350  ILE GLY ASN GLY SER PHE GLY VAL VAL TYR GLN ALA LYS          
SEQRES   4 B  350  LEU CYS ASP SER GLY GLU LEU VAL ALA ILE LYS LYS VAL          
SEQRES   5 B  350  LEU GLN ASP LYS ARG PHE LYS ASN ARG GLU LEU GLN ILE          
SEQRES   6 B  350  MET ARG LYS LEU ASP HIS CYS ASN ILE VAL ARG LEU ARG          
SEQRES   7 B  350  TYR PHE PHE TYR SER SER GLY GLU LYS LYS ASP GLU VAL          
SEQRES   8 B  350  TYR LEU ASN LEU VAL LEU ASP TYR VAL PRO GLU THR VAL          
SEQRES   9 B  350  TYR ARG VAL ALA ARG HIS TYR SER ARG ALA LYS GLN THR          
SEQRES  10 B  350  LEU PRO VAL ILE TYR VAL LYS LEU TYR MET TYR GLN LEU          
SEQRES  11 B  350  PHE ARG SER LEU ALA TYR ILE HIS SER PHE GLY ILE CYS          
SEQRES  12 B  350  HIS ARG ASP ILE LYS PRO GLN ASN LEU LEU LEU ASP PRO          
SEQRES  13 B  350  ASP THR ALA VAL LEU LYS LEU CYS ASP PHE GLY SER ALA          
SEQRES  14 B  350  LYS GLN LEU VAL ARG GLY GLU PRO ASN VAL SER TYR ILE          
SEQRES  15 B  350  CYS SER ARG TYR TYR ARG ALA PRO GLU LEU ILE PHE GLY          
SEQRES  16 B  350  ALA THR ASP TYR THR SER SER ILE ASP VAL TRP SER ALA          
SEQRES  17 B  350  GLY CYS VAL LEU ALA GLU LEU LEU LEU GLY GLN PRO ILE          
SEQRES  18 B  350  PHE PRO GLY ASP SER GLY VAL ASP GLN LEU VAL GLU ILE          
SEQRES  19 B  350  ILE LYS VAL LEU GLY THR PRO THR ARG GLU GLN ILE ARG          
SEQRES  20 B  350  GLU MET ASN PRO ASN TYR THR GLU PHE LYS PHE PRO GLN          
SEQRES  21 B  350  ILE LYS ALA HIS PRO TRP THR LYS VAL PHE ARG PRO ARG          
SEQRES  22 B  350  THR PRO PRO GLU ALA ILE ALA LEU CYS SER ARG LEU LEU          
SEQRES  23 B  350  GLU TYR THR PRO THR ALA ARG LEU THR PRO LEU GLU ALA          
SEQRES  24 B  350  CYS ALA HIS SER PHE PHE ASP GLU LEU ARG ASP PRO ASN          
SEQRES  25 B  350  VAL LYS LEU PRO ASN GLY ARG ASP THR PRO ALA LEU PHE          
SEQRES  26 B  350  ASN PHE THR THR GLN GLU LEU SER SER ASN PRO PRO LEU          
SEQRES  27 B  350  ALA THR ILE LEU ILE PRO PRO HIS ALA ARG ILE GLN              
HET    3UO  A 401      23                                                       
HET    3UO  B 401      23                                                       
HETNAM     3UO 2-[(CYCLOPROPYLCARBONYL)AMINO]-N-(4-METHOXYPYRIDIN-3-            
HETNAM   2 3UO  YL)PYRIDINE-4-CARBOXAMIDE                                       
FORMUL   3  3UO    2(C16 H16 N4 O3)                                             
FORMUL   5  HOH   *38(H2 O)                                                     
HELIX    1 AA1 ASN A   95  LYS A  103  1                                   9    
HELIX    2 AA2 VAL A  139  ALA A  149  1                                  11    
HELIX    3 AA3 PRO A  154  PHE A  175  1                                  22    
HELIX    4 AA4 LYS A  183  GLN A  185  5                                   3    
HELIX    5 AA5 ALA A  224  PHE A  229  1                                   6    
HELIX    6 AA6 SER A  236  GLY A  253  1                                  18    
HELIX    7 AA7 SER A  261  GLY A  274  1                                  14    
HELIX    8 AA8 THR A  277  GLU A  283  1                                   7    
HELIX    9 AA9 PRO A  300  VAL A  304  5                                   5    
HELIX   10 AB1 PRO A  310  LEU A  321  1                                  12    
HELIX   11 AB2 THR A  324  ARG A  328  5                                   5    
HELIX   12 AB3 THR A  330  ALA A  336  1                                   7    
HELIX   13 AB4 HIS A  337  ASP A  345  5                                   9    
HELIX   14 AB5 THR A  363  SER A  368  1                                   6    
HELIX   15 AB6 ASN A  370  PRO A  372  5                                   3    
HELIX   16 AB7 LEU A  373  ILE A  378  1                                   6    
HELIX   17 AB8 ASN B   95  ARG B  102  1                                   8    
HELIX   18 AB9 VAL B  139  ALA B  149  1                                  11    
HELIX   19 AC1 PRO B  154  SER B  174  1                                  21    
HELIX   20 AC2 LYS B  183  GLN B  185  5                                   3    
HELIX   21 AC3 ALA B  224  PHE B  229  1                                   6    
HELIX   22 AC4 SER B  236  GLY B  253  1                                  18    
HELIX   23 AC5 SER B  261  GLY B  274  1                                  14    
HELIX   24 AC6 THR B  277  GLU B  283  1                                   7    
HELIX   25 AC7 PRO B  300  PHE B  305  5                                   6    
HELIX   26 AC8 PRO B  310  LEU B  321  1                                  12    
HELIX   27 AC9 THR B  324  ARG B  328  5                                   5    
HELIX   28 AD1 THR B  330  ALA B  336  1                                   7    
HELIX   29 AD2 HIS B  337  ASP B  345  5                                   9    
HELIX   30 AD3 THR B  363  SER B  368  1                                   6    
HELIX   31 AD4 ASN B  370  PRO B  372  5                                   3    
HELIX   32 AD5 LEU B  373  ILE B  378  1                                   6    
HELIX   33 AD6 PRO B  379  ARG B  383  5                                   5    
SHEET    1 AA1 7 THR A  38  PRO A  44  0                                        
SHEET    2 AA1 7 GLN A  52  GLY A  65 -1  O  VAL A  54   N  VAL A  40           
SHEET    3 AA1 7 GLY A  68  LEU A  75 -1  O  VAL A  70   N  GLY A  63           
SHEET    4 AA1 7 LEU A  81  GLN A  89 -1  O  VAL A  82   N  ALA A  73           
SHEET    5 AA1 7 VAL A 126  ASP A 133 -1  O  LEU A 132   N  ALA A  83           
SHEET    6 AA1 7 LEU A 112  SER A 118 -1  N  SER A 118   O  TYR A 127           
SHEET    7 AA1 7 THR A  38  PRO A  44 -1  N  THR A  43   O  PHE A 115           
SHEET    1 AA2 3 GLU A 137  THR A 138  0                                        
SHEET    2 AA2 3 LEU A 187  ASP A 190 -1  O  LEU A 189   N  GLU A 137           
SHEET    3 AA2 3 VAL A 195  LEU A 198 -1  O  LYS A 197   N  LEU A 188           
SHEET    1 AA3 2 ILE A 177  CYS A 178  0                                        
SHEET    2 AA3 2 LYS A 205  GLN A 206 -1  O  LYS A 205   N  CYS A 178           
SHEET    1 AA4 7 THR B  38  PRO B  44  0                                        
SHEET    2 AA4 7 GLN B  52  GLY B  65 -1  O  VAL B  54   N  VAL B  40           
SHEET    3 AA4 7 GLY B  68  LEU B  75 -1  O  GLN B  72   N  LYS B  60           
SHEET    4 AA4 7 LEU B  81  LEU B  88 -1  O  ILE B  84   N  TYR B  71           
SHEET    5 AA4 7 TYR B 127  ASP B 133 -1  O  LEU B 132   N  ALA B  83           
SHEET    6 AA4 7 LEU B 112  SER B 118 -1  N  SER B 118   O  TYR B 127           
SHEET    7 AA4 7 THR B  38  PRO B  44 -1  N  THR B  43   O  PHE B 115           
SHEET    1 AA5 3 GLU B 137  THR B 138  0                                        
SHEET    2 AA5 3 LEU B 187  ASP B 190 -1  O  LEU B 189   N  GLU B 137           
SHEET    3 AA5 3 VAL B 195  LEU B 198 -1  O  LYS B 197   N  LEU B 188           
SHEET    1 AA6 2 ILE B 177  CYS B 178  0                                        
SHEET    2 AA6 2 LYS B 205  GLN B 206 -1  O  LYS B 205   N  CYS B 178           
CISPEP   1 ASP A   90    LYS A   91          0        -6.68                     
SITE     1 AC1 12 ALA A  83  LYS A  85  VAL A 110  LEU A 132                    
SITE     2 AC1 12 ASP A 133  TYR A 134  VAL A 135  THR A 138                    
SITE     3 AC1 12 ARG A 141  LEU A 188  ASP A 200  HOH A 507                    
SITE     1 AC2 11 ALA B  83  LYS B  85  LEU B 132  ASP B 133                    
SITE     2 AC2 11 TYR B 134  VAL B 135  PRO B 136  THR B 138                    
SITE     3 AC2 11 ARG B 141  CYS B 199  ASP B 200                               
CRYST1   83.000   82.910  177.348  90.00  90.00  90.00 P 21 21 21    8          
ORIGX1      1.000000  0.000000  0.000000        0.00000                         
ORIGX2      0.000000  1.000000  0.000000        0.00000                         
ORIGX3      0.000000  0.000000  1.000000        0.00000                         
SCALE1      0.012048  0.000000  0.000000        0.00000                         
SCALE2      0.000000  0.012061  0.000000        0.00000                         
SCALE3      0.000000  0.000000  0.005639        0.00000                         
ATOM      1  N   LYS A  36     -26.409 -38.065  14.405  1.00 83.13           N  
ANISOU    1  N   LYS A  36    10361  10509  10716  -1137  -1418   1566       N  
ATOM      2  CA  LYS A  36     -25.730 -38.335  13.140  1.00 86.54           C  
ANISOU    2  CA  LYS A  36    10690  10714  11476   -904  -1360   1382       C  
ATOM      3  C   LYS A  36     -26.326 -37.478  12.025  1.00 87.43           C  
ANISOU    3  C   LYS A  36    10683  11061  11473   -832  -1122   1093       C  
ATOM      4  O   LYS A  36     -25.856 -36.373  11.761  1.00 90.79           O  
ANISOU    4  O   LYS A  36    10996  11640  11859   -676  -1064    982       O  
ATOM      5  N   VAL A  37     -27.372 -37.983  11.381  1.00 86.12           N  
ANISOU    5  N   VAL A  37    10548  10924  11250   -961  -1001    985       N  
ATOM      6  CA  VAL A  37     -28.011 -37.256  10.281  1.00 81.98           C  
ANISOU    6  CA  VAL A  37     9917  10613  10620   -919   -810    737       C  
ATOM      7  C   VAL A  37     -29.294 -36.530  10.696  1.00 77.54           C  
ANISOU    7  C   VAL A  37     9320  10411   9732  -1077   -719    730       C  
ATOM      8  O   VAL A  37     -30.222 -37.144  11.214  1.00 82.54           O  
ANISOU    8  O   VAL A  37    10027  11092  10244  -1301   -722    826       O  
ATOM      9  CB  VAL A  37     -28.364 -38.191   9.110  1.00 77.70           C  
ANISOU    9  CB  VAL A  37     9408   9890  10225   -962   -727    585       C  
ATOM     10  CG1 VAL A  37     -28.952 -37.384   7.972  1.00 81.29           C  
ANISOU   10  CG1 VAL A  37     9759  10573  10555   -931   -565    354       C  
ATOM     11  CG2 VAL A  37     -27.140 -38.953   8.638  1.00 74.15           C  
ANISOU   11  CG2 VAL A  37     8979   9064  10131   -800   -777    550       C  
ATOM     12  N   THR A  38     -29.340 -35.223  10.458  1.00 71.95           N  
ANISOU   12  N   THR A  38     8492   9946   8899   -960   -632    612       N  
ATOM     13  CA  THR A  38     -30.543 -34.434  10.702  1.00 69.95           C  
ANISOU   13  CA  THR A  38     8165  10022   8392  -1065   -525    566       C  
ATOM     14  C   THR A  38     -31.324 -34.235   9.405  1.00 73.17           C  
ANISOU   14  C   THR A  38     8474  10531   8795  -1056   -410    375       C  
ATOM     15  O   THR A  38     -30.764 -33.816   8.391  1.00 69.73           O  
ANISOU   15  O   THR A  38     7988  10046   8459   -896   -382    239       O  
ATOM     16  CB  THR A  38     -30.216 -33.054  11.281  1.00 70.08           C  
ANISOU   16  CB  THR A  38     8113  10237   8277   -949   -505    554       C  
ATOM     17  OG1 THR A  38     -29.377 -33.200  12.436  1.00 75.86           O  
ANISOU   17  OG1 THR A  38     8944  10875   9003   -967   -635    734       O  
ATOM     18  CG2 THR A  38     -31.508 -32.318  11.664  1.00 65.14           C  
ANISOU   18  CG2 THR A  38     7402   9925   7421  -1059   -381    503       C  
ATOM     19  N   THR A  39     -32.619 -34.533   9.437  1.00 76.04           N  
ANISOU   19  N   THR A  39     8808  11046   9036  -1248   -351    371       N  
ATOM     20  CA  THR A  39     -33.460 -34.331   8.259  1.00 79.70           C  
ANISOU   20  CA  THR A  39     9169  11631   9483  -1269   -273    215       C  
ATOM     21  C   THR A  39     -34.537 -33.301   8.536  1.00 70.70           C  
ANISOU   21  C   THR A  39     7868  10820   8174  -1296   -192    178       C  
ATOM     22  O   THR A  39     -35.309 -33.445   9.477  1.00 72.63           O  
ANISOU   22  O   THR A  39     8096  11202   8300  -1455   -154    258       O  
ATOM     23  CB  THR A  39     -34.125 -35.635   7.797  1.00 83.69           C  
ANISOU   23  CB  THR A  39     9746  12018  10033  -1477   -279    216       C  
ATOM     24  OG1 THR A  39     -33.116 -36.637   7.601  1.00 88.59           O  
ANISOU   24  OG1 THR A  39    10517  12296  10847  -1441   -346    243       O  
ATOM     25  CG2 THR A  39     -34.881 -35.404   6.492  1.00 79.60           C  
ANISOU   25  CG2 THR A  39     9130  11623   9492  -1507   -227     58       C  
ATOM     26  N   VAL A  40     -34.593 -32.271   7.702  1.00 63.72           N  
ANISOU   26  N   VAL A  40     6866  10056   7291  -1147   -160     54       N  
ATOM     27  CA  VAL A  40     -35.569 -31.203   7.869  1.00 63.10           C  
ANISOU   27  CA  VAL A  40     6610  10259   7108  -1129    -91      8       C  
ATOM     28  C   VAL A  40     -36.366 -30.987   6.588  1.00 61.97           C  
ANISOU   28  C   VAL A  40     6344  10217   6986  -1142    -94    -95       C  
ATOM     29  O   VAL A  40     -35.947 -31.410   5.509  1.00 69.89           O  
ANISOU   29  O   VAL A  40     7419  11081   8056  -1135   -140   -153       O  
ATOM     30  CB  VAL A  40     -34.886 -29.869   8.266  1.00 57.68           C  
ANISOU   30  CB  VAL A  40     5887   9633   6397   -919    -76    -18       C  
ATOM     31  CG1 VAL A  40     -34.225 -29.972   9.633  1.00 55.93           C  
ANISOU   31  CG1 VAL A  40     5776   9358   6116   -940    -85     92       C  
ATOM     32  CG2 VAL A  40     -33.884 -29.426   7.172  1.00 55.43           C  
ANISOU   32  CG2 VAL A  40     5634   9220   6209   -739   -126    -97       C  
ATOM     33  N   VAL A  41     -37.509 -30.321   6.711  1.00 54.15           N  
ANISOU   33  N   VAL A  41     5164   9468   5941  -1169    -46   -121       N  
ATOM     34  CA  VAL A  41     -38.272 -29.907   5.552  1.00 59.27           C  
ANISOU   34  CA  VAL A  41     5669  10234   6615  -1163    -84   -193       C  
ATOM     35  C   VAL A  41     -38.072 -28.400   5.423  1.00 63.68           C  
ANISOU   35  C   VAL A  41     6119  10886   7190   -935    -83   -242       C  
ATOM     36  O   VAL A  41     -38.716 -27.608   6.121  1.00 61.42           O  
ANISOU   36  O   VAL A  41     5677  10767   6892   -882    -17   -250       O  
ATOM     37  CB  VAL A  41     -39.750 -30.269   5.681  1.00 63.36           C  
ANISOU   37  CB  VAL A  41     6017  10948   7108  -1354    -53   -180       C  
ATOM     38  CG1 VAL A  41     -40.490 -30.015   4.341  1.00 59.35           C  
ANISOU   38  CG1 VAL A  41     5375  10538   6637  -1379   -142   -231       C  
ATOM     39  CG2 VAL A  41     -39.882 -31.725   6.092  1.00 60.67           C  
ANISOU   39  CG2 VAL A  41     5811  10503   6739  -1593    -41   -114       C  
ATOM     40  N   ALA A  42     -37.168 -28.017   4.520  1.00 62.58           N  
ANISOU   40  N   ALA A  42     6068  10627   7082   -810   -147   -283       N  
ATOM     41  CA  ALA A  42     -36.727 -26.637   4.419  1.00 52.45           C  
ANISOU   41  CA  ALA A  42     4736   9380   5813   -599   -158   -315       C  
ATOM     42  C   ALA A  42     -37.232 -25.980   3.153  1.00 58.16           C  
ANISOU   42  C   ALA A  42     5360  10181   6556   -566   -247   -350       C  
ATOM     43  O   ALA A  42     -37.369 -26.610   2.084  1.00 56.84           O  
ANISOU   43  O   ALA A  42     5244   9979   6376   -689   -315   -367       O  
ATOM     44  CB  ALA A  42     -35.208 -26.560   4.490  1.00 55.78           C  
ANISOU   44  CB  ALA A  42     5331   9615   6247   -486   -162   -321       C  
ATOM     45  N   THR A  43     -37.543 -24.701   3.299  1.00 62.16           N  
ANISOU   45  N   THR A  43     5731  10790   7096   -413   -254   -358       N  
ATOM     46  CA  THR A  43     -37.982 -23.878   2.190  1.00 61.49           C  
ANISOU   46  CA  THR A  43     5551  10769   7045   -357   -370   -361       C  
ATOM     47  C   THR A  43     -36.776 -23.323   1.459  1.00 58.12           C  
ANISOU   47  C   THR A  43     5286  10210   6589   -259   -420   -381       C  
ATOM     48  O   THR A  43     -35.898 -22.708   2.076  1.00 63.94           O  
ANISOU   48  O   THR A  43     6091  10875   7331   -120   -366   -395       O  
ATOM     49  CB  THR A  43     -38.871 -22.726   2.688  1.00 62.68           C  
ANISOU   49  CB  THR A  43     5473  11060   7284   -220   -358   -360       C  
ATOM     50  OG1 THR A  43     -40.024 -23.272   3.323  1.00 67.63           O  
ANISOU   50  OG1 THR A  43     5925  11829   7941   -332   -289   -356       O  
ATOM     51  CG2 THR A  43     -39.309 -21.841   1.533  1.00 68.76           C  
ANISOU   51  CG2 THR A  43     6143  11871   8113   -154   -517   -330       C  
ATOM     52  N   PRO A  44     -36.730 -23.514   0.140  1.00 56.82           N  
ANISOU   52  N   PRO A  44     5186  10022   6380   -352   -522   -386       N  
ATOM     53  CA  PRO A  44     -35.630 -22.946  -0.645  1.00 58.30           C  
ANISOU   53  CA  PRO A  44     5523  10104   6524   -289   -557   -412       C  
ATOM     54  C   PRO A  44     -35.624 -21.435  -0.528  1.00 58.89           C  
ANISOU   54  C   PRO A  44     5520  10213   6642   -104   -608   -380       C  
ATOM     55  O   PRO A  44     -36.703 -20.851  -0.510  1.00 64.40           O  
ANISOU   55  O   PRO A  44     6038  11025   7406    -63   -680   -335       O  
ATOM     56  CB  PRO A  44     -35.953 -23.393  -2.076  1.00 57.44           C  
ANISOU   56  CB  PRO A  44     5473  10016   6336   -471   -661   -420       C  
ATOM     57  CG  PRO A  44     -36.787 -24.606  -1.900  1.00 60.10           C  
ANISOU   57  CG  PRO A  44     5761  10399   6674   -642   -642   -422       C  
ATOM     58  CD  PRO A  44     -37.620 -24.342  -0.683  1.00 63.07           C  
ANISOU   58  CD  PRO A  44     5941  10883   7139   -556   -599   -376       C  
ATOM     59  N   GLY A  45     -34.445 -20.819  -0.478  1.00 63.47           N  
ANISOU   59  N   GLY A  45     6222  10687   7205      2   -575   -405       N  
ATOM     60  CA  GLY A  45     -34.369 -19.386  -0.275  1.00 70.53           C  
ANISOU   60  CA  GLY A  45     7067  11585   8145    173   -615   -380       C  
ATOM     61  C   GLY A  45     -35.030 -18.619  -1.399  1.00 80.56           C  
ANISOU   61  C   GLY A  45     8282  12909   9419    161   -784   -316       C  
ATOM     62  O   GLY A  45     -35.735 -17.638  -1.157  1.00 85.91           O  
ANISOU   62  O   GLY A  45     8814  13630  10197    289   -847   -274       O  
ATOM     63  N   GLN A  46     -34.860 -19.097  -2.627  1.00 84.56           N  
ANISOU   63  N   GLN A  46     8899  13409   9821     -4   -861   -310       N  
ATOM     64  CA  GLN A  46     -35.353 -18.366  -3.782  1.00 88.94           C  
ANISOU   64  CA  GLN A  46     9444  14008  10343    -53  -1052   -227       C  
ATOM     65  C   GLN A  46     -36.643 -19.013  -4.297  1.00 98.13           C  
ANISOU   65  C   GLN A  46    10479  15296  11509   -202  -1167   -176       C  
ATOM     66  O   GLN A  46     -37.132 -19.990  -3.725  1.00 99.57           O  
ANISOU   66  O   GLN A  46    10583  15528  11721   -263  -1081   -215       O  
ATOM     67  CB  GLN A  46     -34.285 -18.309  -4.882  1.00 84.78           C  
ANISOU   67  CB  GLN A  46     9145  13407   9660   -172  -1070   -251       C  
ATOM     68  N   GLY A  47     -37.197 -18.444  -5.364  1.00102.04           N  
ANISOU   68  N   GLY A  47    10955  15844  11973   -274  -1378    -75       N  
ATOM     69  CA  GLY A  47     -38.446 -18.899  -5.953  1.00101.39           C  
ANISOU   69  CA  GLY A  47    10735  15892  11896   -425  -1537     -2       C  
ATOM     70  C   GLY A  47     -39.649 -19.056  -5.041  1.00101.90           C  
ANISOU   70  C   GLY A  47    10509  16061  12145   -338  -1520     16       C  
ATOM     71  O   GLY A  47     -39.714 -18.452  -3.969  1.00 95.53           O  
ANISOU   71  O   GLY A  47     9572  15235  11489   -121  -1417     -9       O  
ATOM     72  N   PRO A  48     -40.617 -19.880  -5.471  1.00106.43           N  
ANISOU   72  N   PRO A  48    10981  16756  12701   -529  -1609     47       N  
ATOM     73  CA  PRO A  48     -41.855 -20.102  -4.717  1.00101.19           C  
ANISOU   73  CA  PRO A  48    10018  16221  12210   -489  -1595     65       C  
ATOM     74  C   PRO A  48     -41.642 -20.900  -3.433  1.00 95.60           C  
ANISOU   74  C   PRO A  48     9304  15498  11521   -461  -1332    -49       C  
ATOM     75  O   PRO A  48     -40.721 -21.718  -3.314  1.00 92.27           O  
ANISOU   75  O   PRO A  48     9108  14980  10968   -548  -1198   -129       O  
ATOM     76  CB  PRO A  48     -42.728 -20.880  -5.702  1.00102.36           C  
ANISOU   76  CB  PRO A  48    10121  16490  12280   -761  -1773    128       C  
ATOM     77  CG  PRO A  48     -41.764 -21.587  -6.575  1.00104.72           C  
ANISOU   77  CG  PRO A  48    10752  16704  12333   -969  -1751     68       C  
ATOM     78  CD  PRO A  48     -40.589 -20.656  -6.724  1.00108.54           C  
ANISOU   78  CD  PRO A  48    11418  17052  12769   -819  -1721     57       C  
ATOM     79  N   ASP A  49     -42.512 -20.640  -2.469  1.00 92.87           N  
ANISOU   79  N   ASP A  49     8692  15245  11348   -344  -1262    -53       N  
ATOM     80  CA  ASP A  49     -42.442 -21.272  -1.166  1.00 86.08           C  
ANISOU   80  CA  ASP A  49     7813  14394  10499   -332  -1024   -142       C  
ATOM     81  C   ASP A  49     -42.826 -22.756  -1.248  1.00 82.13           C  
ANISOU   81  C   ASP A  49     7351  13952   9904   -598   -989   -157       C  
ATOM     82  O   ASP A  49     -43.934 -23.144  -0.873  1.00 82.79           O  
ANISOU   82  O   ASP A  49     7208  14180  10070   -681   -971   -145       O  
ATOM     83  CB  ASP A  49     -43.346 -20.509  -0.207  1.00 94.18           C  
ANISOU   83  CB  ASP A  49     8536  15519  11728   -158   -949   -158       C  
ATOM     84  CG  ASP A  49     -43.018 -20.770   1.236  1.00102.72           C  
ANISOU   84  CG  ASP A  49     9648  16590  12792   -111   -691   -254       C  
ATOM     85  OD1 ASP A  49     -42.934 -21.958   1.614  1.00104.76           O  
ANISOU   85  OD1 ASP A  49    10002  16863  12940   -293   -593   -275       O  
ATOM     86  OD2 ASP A  49     -42.849 -19.784   1.991  1.00107.09           O  
ANISOU   86  OD2 ASP A  49    10142  17111  13434     94   -594   -304       O  
ATOM     87  N   ARG A  50     -41.917 -23.578  -1.767  1.00 78.10           N  
ANISOU   87  N   ARG A  50     7120  13322   9234   -736   -973   -191       N  
ATOM     88  CA  ARG A  50     -42.149 -25.021  -1.889  1.00 74.64           C  
ANISOU   88  CA  ARG A  50     6764  12888   8710   -990   -936   -217       C  
ATOM     89  C   ARG A  50     -41.082 -25.857  -1.162  1.00 70.67           C  
ANISOU   89  C   ARG A  50     6488  12221   8142  -1001   -756   -287       C  
ATOM     90  O   ARG A  50     -40.024 -26.153  -1.708  1.00 74.08           O  
ANISOU   90  O   ARG A  50     7155  12500   8492  -1023   -744   -333       O  
ATOM     91  CB  ARG A  50     -42.235 -25.414  -3.365  1.00 77.86           C  
ANISOU   91  CB  ARG A  50     7286  13296   9001  -1196  -1107   -200       C  
ATOM     92  CG  ARG A  50     -43.441 -24.801  -4.072  1.00 87.00           C  
ANISOU   92  CG  ARG A  50     8203  14628  10224  -1238  -1328    -98       C  
ATOM     93  CD  ARG A  50     -44.743 -25.205  -3.371  1.00 98.57           C  
ANISOU   93  CD  ARG A  50     9376  16261  11814  -1305  -1303    -71       C  
ATOM     94  NE  ARG A  50     -45.937 -24.628  -3.992  1.00105.96           N  
ANISOU   94  NE  ARG A  50    10031  17368  12862  -1330  -1525     34       N  
ATOM     95  CZ  ARG A  50     -46.791 -23.819  -3.367  1.00110.48           C  
ANISOU   95  CZ  ARG A  50    10268  18057  13654  -1152  -1530     74       C  
ATOM     96  NH1 ARG A  50     -46.583 -23.483  -2.097  1.00110.46           N  
ANISOU   96  NH1 ARG A  50    10195  18029  13746   -956  -1306      1       N  
ATOM     97  NH2 ARG A  50     -47.855 -23.346  -4.009  1.00109.96           N  
ANISOU   97  NH2 ARG A  50     9931  18131  13717  -1175  -1760    181       N  
ATOM     98  N   PRO A  51     -41.358 -26.230   0.088  1.00 68.14           N  
ANISOU   98  N   PRO A  51     6090  11932   7867   -992   -617   -291       N  
ATOM     99  CA  PRO A  51     -40.355 -26.889   0.930  1.00 65.45           C  
ANISOU   99  CA  PRO A  51     5947  11434   7486   -981   -477   -322       C  
ATOM    100  C   PRO A  51     -39.909 -28.249   0.416  1.00 64.29           C  
ANISOU  100  C   PRO A  51     6013  11141   7274  -1178   -474   -352       C  
ATOM    101  O   PRO A  51     -40.607 -28.850  -0.377  1.00 67.05           O  
ANISOU  101  O   PRO A  51     6343  11543   7590  -1371   -552   -354       O  
ATOM    102  CB  PRO A  51     -41.084 -27.034   2.278  1.00 59.94           C  
ANISOU  102  CB  PRO A  51     5097  10851   6826  -1000   -356   -301       C  
ATOM    103  CG  PRO A  51     -42.167 -25.993   2.227  1.00 58.48           C  
ANISOU  103  CG  PRO A  51     4621  10860   6737   -906   -398   -290       C  
ATOM    104  CD  PRO A  51     -42.621 -26.013   0.812  1.00 58.78           C  
ANISOU  104  CD  PRO A  51     4621  10938   6777   -997   -582   -263       C  
ATOM    105  N   GLN A  52     -38.755 -28.720   0.884  1.00 64.35           N  
ANISOU  105  N   GLN A  52     6215  10958   7279  -1128   -390   -375       N  
ATOM    106  CA  GLN A  52     -38.238 -30.027   0.496  1.00 64.65           C  
ANISOU  106  CA  GLN A  52     6453  10810   7300  -1283   -369   -417       C  
ATOM    107  C   GLN A  52     -37.453 -30.634   1.650  1.00 61.99           C  
ANISOU  107  C   GLN A  52     6231  10313   7009  -1239   -278   -385       C  
ATOM    108  O   GLN A  52     -36.966 -29.924   2.543  1.00 58.53           O  
ANISOU  108  O   GLN A  52     5764   9886   6588  -1072   -238   -348       O  
ATOM    109  CB  GLN A  52     -37.387 -29.959  -0.777  1.00 67.43           C  
ANISOU  109  CB  GLN A  52     6958  11042   7621  -1274   -403   -505       C  
ATOM    110  CG  GLN A  52     -36.370 -28.840  -0.830  1.00 76.71           C  
ANISOU  110  CG  GLN A  52     8159  12178   8808  -1050   -393   -522       C  
ATOM    111  CD  GLN A  52     -36.001 -28.461  -2.269  1.00 81.96           C  
ANISOU  111  CD  GLN A  52     8912  12831   9399  -1089   -450   -594       C  
ATOM    112  OE1 GLN A  52     -34.819 -28.425  -2.633  1.00 78.24           O  
ANISOU  112  OE1 GLN A  52     8579  12216   8932  -1024   -391   -669       O  
ATOM    113  NE2 GLN A  52     -37.019 -28.172  -3.090  1.00 88.39           N  
ANISOU  113  NE2 GLN A  52     9640  13805  10140  -1211   -570   -567       N  
ATOM    114  N   GLU A  53     -37.433 -31.964   1.673  1.00 64.03           N  
ANISOU  114  N   GLU A  53     6616  10427   7286  -1410   -259   -387       N  
ATOM    115  CA  GLU A  53     -36.702 -32.722   2.671  1.00 57.52           C  
ANISOU  115  CA  GLU A  53     5919   9414   6521  -1399   -211   -331       C  
ATOM    116  C   GLU A  53     -35.218 -32.575   2.364  1.00 63.28           C  
ANISOU  116  C   GLU A  53     6778   9935   7331  -1225   -199   -387       C  
ATOM    117  O   GLU A  53     -34.746 -32.969   1.293  1.00 64.22           O  
ANISOU  117  O   GLU A  53     6997   9923   7482  -1255   -193   -493       O  
ATOM    118  CB  GLU A  53     -37.127 -34.192   2.652  1.00 63.68           C  
ANISOU  118  CB  GLU A  53     6806  10068   7322  -1636   -211   -316       C  
ATOM    119  CG  GLU A  53     -38.495 -34.467   3.284  1.00 74.71           C  
ANISOU  119  CG  GLU A  53     8077  11660   8649  -1829   -206   -237       C  
ATOM    120  CD  GLU A  53     -39.097 -35.786   2.819  1.00 91.63           C  
ANISOU  120  CD  GLU A  53    10311  13712  10792  -2100   -225   -251       C  
ATOM    121  OE1 GLU A  53     -40.277 -36.062   3.123  1.00 95.96           O  
ANISOU  121  OE1 GLU A  53    10745  14432  11283  -2293   -224   -202       O  
ATOM    122  OE2 GLU A  53     -38.388 -36.548   2.133  1.00101.78           O  
ANISOU  122  OE2 GLU A  53    11778  14750  12142  -2128   -232   -325       O  
ATOM    123  N   VAL A  54     -34.511 -31.963   3.304  1.00 66.01           N  
ANISOU  123  N   VAL A  54     7112  10268   7700  -1058   -186   -325       N  
ATOM    124  CA  VAL A  54     -33.079 -31.716   3.232  1.00 63.60           C  
ANISOU  124  CA  VAL A  54     6890   9791   7484   -883   -179   -357       C  
ATOM    125  C   VAL A  54     -32.395 -32.416   4.390  1.00 65.85           C  
ANISOU  125  C   VAL A  54     7262   9904   7856   -867   -194   -248       C  
ATOM    126  O   VAL A  54     -32.869 -32.332   5.522  1.00 66.23           O  
ANISOU  126  O   VAL A  54     7278  10053   7834   -914   -204   -136       O  
ATOM    127  CB  VAL A  54     -32.766 -30.211   3.304  1.00 60.48           C  
ANISOU  127  CB  VAL A  54     6403   9539   7039   -700   -181   -367       C  
ATOM    128  CG1 VAL A  54     -31.256 -29.962   3.291  1.00 52.73           C  
ANISOU  128  CG1 VAL A  54     5493   8391   6152   -537   -173   -394       C  
ATOM    129  CG2 VAL A  54     -33.491 -29.467   2.195  1.00 62.31           C  
ANISOU  129  CG2 VAL A  54     6548   9934   7192   -719   -201   -439       C  
ATOM    130  N   SER A  55     -31.294 -33.108   4.119  1.00 67.67           N  
ANISOU  130  N   SER A  55     7597   9873   8240   -811   -197   -281       N  
ATOM    131  CA  SER A  55     -30.593 -33.836   5.173  1.00 66.24           C  
ANISOU  131  CA  SER A  55     7496   9497   8175   -792   -250   -152       C  
ATOM    132  C   SER A  55     -29.163 -33.359   5.319  1.00 68.09           C  
ANISOU  132  C   SER A  55     7726   9611   8535   -587   -272   -155       C  
ATOM    133  O   SER A  55     -28.457 -33.180   4.326  1.00 67.69           O  
ANISOU  133  O   SER A  55     7667   9478   8573   -491   -220   -293       O  
ATOM    134  CB  SER A  55     -30.606 -35.334   4.911  1.00 68.06           C  
ANISOU  134  CB  SER A  55     7846   9472   8543   -920   -259   -156       C  
ATOM    135  OG  SER A  55     -31.931 -35.821   4.870  1.00 80.97           O  
ANISOU  135  OG  SER A  55     9486  11222  10058  -1138   -249   -139       O  
ATOM    136  N   TYR A  56     -28.731 -33.153   6.559  1.00 64.91           N  
ANISOU  136  N   TYR A  56     7329   9206   8128   -540   -347     -3       N  
ATOM    137  CA  TYR A  56     -27.359 -32.734   6.778  1.00 69.52           C  
ANISOU  137  CA  TYR A  56     7894   9680   8840   -361   -391     14       C  
ATOM    138  C   TYR A  56     -26.732 -33.432   7.960  1.00 72.25           C  
ANISOU  138  C   TYR A  56     8305   9852   9294   -371   -521    206       C  
ATOM    139  O   TYR A  56     -27.415 -34.019   8.793  1.00 72.05           O  
ANISOU  139  O   TYR A  56     8350   9840   9184   -527   -575    344       O  
ATOM    140  CB  TYR A  56     -27.279 -31.219   6.962  1.00 65.55           C  
ANISOU  140  CB  TYR A  56     7309   9408   8189   -261   -371    -10       C  
ATOM    141  CG  TYR A  56     -28.077 -30.672   8.125  1.00 58.88           C  
ANISOU  141  CG  TYR A  56     6458   8772   7143   -342   -391    101       C  
ATOM    142  CD1 TYR A  56     -27.550 -30.660   9.411  1.00 64.04           C  
ANISOU  142  CD1 TYR A  56     7160   9400   7774   -352   -483    256       C  
ATOM    143  CD2 TYR A  56     -29.334 -30.135   7.933  1.00 55.91           C  
ANISOU  143  CD2 TYR A  56     6018   8622   6604   -415   -316     43       C  
ATOM    144  CE1 TYR A  56     -28.258 -30.153  10.473  1.00 63.32           C  
ANISOU  144  CE1 TYR A  56     7077   9505   7476   -451   -472    330       C  
ATOM    145  CE2 TYR A  56     -30.053 -29.623   8.992  1.00 61.48           C  
ANISOU  145  CE2 TYR A  56     6700   9516   7144   -487   -298    111       C  
ATOM    146  CZ  TYR A  56     -29.508 -29.636  10.259  1.00 68.39           C  
ANISOU  146  CZ  TYR A  56     7646  10365   7973   -512   -362    243       C  
ATOM    147  OH  TYR A  56     -30.219 -29.132  11.321  1.00 75.85           O  
ANISOU  147  OH  TYR A  56     8585  11505   8730   -610   -316    287       O  
ATOM    148  N   THR A  57     -25.409 -33.388   8.004  1.00 79.07           N  
ANISOU  148  N   THR A  57     9141  10551  10351   -216   -579    221       N  
ATOM    149  CA  THR A  57     -24.663 -34.033   9.072  1.00 81.99           C  
ANISOU  149  CA  THR A  57     9559  10733  10861   -208   -743    423       C  
ATOM    150  C   THR A  57     -23.396 -33.238   9.379  1.00 80.69           C  
ANISOU  150  C   THR A  57     9310  10563  10784    -41   -812    452       C  
ATOM    151  O   THR A  57     -23.221 -32.132   8.863  1.00 75.99           O  
ANISOU  151  O   THR A  57     8638  10132  10102     47   -722    321       O  
ATOM    152  CB  THR A  57     -24.320 -35.485   8.708  1.00 83.56           C  
ANISOU  152  CB  THR A  57     9812  10592  11347   -211   -779    432       C  
ATOM    153  OG1 THR A  57     -23.732 -36.137   9.842  1.00 88.06           O  
ANISOU  153  OG1 THR A  57    10436  10975  12046   -225   -978    674       O  
ATOM    154  CG2 THR A  57     -23.367 -35.530   7.517  1.00 78.65           C  
ANISOU  154  CG2 THR A  57     9101   9804  10976    -37   -677    227       C  
ATOM    155  N   ASP A  58     -22.538 -33.801  10.231  1.00 86.78           N  
ANISOU  155  N   ASP A  58    10100  11144  11728    -12   -989    639       N  
ATOM    156  CA  ASP A  58     -21.226 -33.229  10.569  1.00 84.91           C  
ANISOU  156  CA  ASP A  58     9769  10869  11626    136  -1091    693       C  
ATOM    157  C   ASP A  58     -21.317 -31.831  11.173  1.00 77.48           C  
ANISOU  157  C   ASP A  58     8817  10219  10402    115  -1093    710       C  
ATOM    158  O   ASP A  58     -20.498 -30.962  10.865  1.00 79.92           O  
ANISOU  158  O   ASP A  58     9028  10582  10758    241  -1070    629       O  
ATOM    159  CB  ASP A  58     -20.324 -33.177   9.333  1.00 87.39           C  
ANISOU  159  CB  ASP A  58     9951  11052  12202    319   -975    485       C  
ATOM    160  CG  ASP A  58     -20.003 -34.550   8.790  1.00 99.31           C  
ANISOU  160  CG  ASP A  58    11458  12230  14046    366   -968    447       C  
ATOM    161  OD1 ASP A  58     -20.247 -35.543   9.506  1.00104.94           O  
ANISOU  161  OD1 ASP A  58    12265  12774  14835    281  -1109    630       O  
ATOM    162  OD2 ASP A  58     -19.502 -34.635   7.647  1.00104.80           O  
ANISOU  162  OD2 ASP A  58    12068  12825  14927    476   -814    228       O  
ATOM    163  N   THR A  59     -22.287 -31.641  12.061  1.00 69.60           N  
ANISOU  163  N   THR A  59     7925   9400   9122    -56  -1112    812       N  
ATOM    164  CA  THR A  59     -22.562 -30.339  12.650  1.00 70.76           C  
ANISOU  164  CA  THR A  59     8079   9820   8987    -94  -1078    798       C  
ATOM    165  C   THR A  59     -21.490 -29.905  13.656  1.00 81.90           C  
ANISOU  165  C   THR A  59     9496  11223  10401    -80  -1258    954       C  
ATOM    166  O   THR A  59     -21.137 -30.644  14.576  1.00 86.71           O  
ANISOU  166  O   THR A  59    10177  11711  11056   -169  -1448   1173       O  
ATOM    167  CB  THR A  59     -23.938 -30.342  13.345  1.00 78.69           C  
ANISOU  167  CB  THR A  59     9183  11013   9703   -296  -1019    841       C  
ATOM    168  OG1 THR A  59     -24.961 -30.636  12.384  1.00 75.23           O  
ANISOU  168  OG1 THR A  59     8716  10610   9258   -316   -864    695       O  
ATOM    169  CG2 THR A  59     -24.221 -28.994  13.973  1.00 86.09           C  
ANISOU  169  CG2 THR A  59    10125  12211  10373   -328   -959    798       C  
ATOM    170  N   LYS A  60     -20.975 -28.695  13.464  1.00 81.46           N  
ANISOU  170  N   LYS A  60     9369  11292  10289     17  -1212    851       N  
ATOM    171  CA  LYS A  60     -20.011 -28.091  14.374  1.00 76.60           C  
ANISOU  171  CA  LYS A  60     8758  10710   9638     11  -1371    974       C  
ATOM    172  C   LYS A  60     -20.390 -26.635  14.575  1.00 77.32           C  
ANISOU  172  C   LYS A  60     8872  11052   9455    -13  -1258    856       C  
ATOM    173  O   LYS A  60     -20.957 -26.014  13.684  1.00 77.46           O  
ANISOU  173  O   LYS A  60     8842  11163   9428     60  -1077    666       O  
ATOM    174  CB  LYS A  60     -18.583 -28.178  13.820  1.00 72.88           C  
ANISOU  174  CB  LYS A  60     8139  10062   9489    187  -1454    966       C  
ATOM    175  CG  LYS A  60     -18.330 -29.311  12.832  1.00 74.65           C  
ANISOU  175  CG  LYS A  60     8280  10040  10045    301  -1415    907       C  
ATOM    176  N   VAL A  61     -20.108 -26.090  15.750  1.00 76.11           N  
ANISOU  176  N   VAL A  61     8802  11001   9116   -126  -1370    971       N  
ATOM    177  CA  VAL A  61     -20.351 -24.672  15.975  1.00 72.07           C  
ANISOU  177  CA  VAL A  61     8319  10695   8371   -142  -1262    845       C  
ATOM    178  C   VAL A  61     -19.208 -23.885  15.360  1.00 71.54           C  
ANISOU  178  C   VAL A  61     8141  10589   8453     12  -1285    766       C  
ATOM    179  O   VAL A  61     -18.061 -24.282  15.485  1.00 71.91           O  
ANISOU  179  O   VAL A  61     8123  10504   8694     54  -1455    884       O  
ATOM    180  CB  VAL A  61     -20.478 -24.335  17.475  1.00 70.05           C  
ANISOU  180  CB  VAL A  61     8217  10571   7829   -352  -1352    968       C  
ATOM    181  CG1 VAL A  61     -20.586 -22.836  17.668  1.00 69.16           C  
ANISOU  181  CG1 VAL A  61     8132  10633   7514   -350  -1235    813       C  
ATOM    182  CG2 VAL A  61     -21.690 -25.028  18.065  1.00 70.29           C  
ANISOU  182  CG2 VAL A  61     8356  10670   7679   -532  -1290   1024       C  
ATOM    183  N   ILE A  62     -19.504 -22.778  14.688  1.00 74.53           N  
ANISOU  183  N   ILE A  62     8487  11074   8757     92  -1123    577       N  
ATOM    184  CA  ILE A  62     -18.434 -21.966  14.127  1.00 73.55           C  
ANISOU  184  CA  ILE A  62     8274  10925   8747    206  -1137    505       C  
ATOM    185  C   ILE A  62     -18.605 -20.504  14.499  1.00 73.50           C  
ANISOU  185  C   ILE A  62     8337  11073   8517    171  -1071    409       C  
ATOM    186  O   ILE A  62     -17.841 -19.655  14.050  1.00 80.42           O  
ANISOU  186  O   ILE A  62     9162  11948   9446    241  -1066    337       O  
ATOM    187  CB  ILE A  62     -18.354 -22.079  12.584  1.00 75.27           C  
ANISOU  187  CB  ILE A  62     8373  11064   9162    356  -1008    356       C  
ATOM    188  CG1 ILE A  62     -19.594 -21.488  11.920  1.00 67.42           C  
ANISOU  188  CG1 ILE A  62     7411  10184   8024    372   -825    202       C  
ATOM    189  CG2 ILE A  62     -18.131 -23.523  12.155  1.00 80.97           C  
ANISOU  189  CG2 ILE A  62     9029  11605  10130    397  -1050    416       C  
ATOM    190  CD1 ILE A  62     -19.569 -21.593  10.435  1.00 63.93           C  
ANISOU  190  CD1 ILE A  62     6884   9681   7724    474   -716     70       C  
ATOM    191  N   GLY A  63     -19.580 -20.214  15.350  1.00 71.80           N  
ANISOU  191  N   GLY A  63     8241  10984   8056     51  -1012    401       N  
ATOM    192  CA  GLY A  63     -19.853 -18.842  15.728  1.00 67.73           C  
ANISOU  192  CA  GLY A  63     7799  10594   7342     22   -923    283       C  
ATOM    193  C   GLY A  63     -20.981 -18.657  16.725  1.00 71.73           C  
ANISOU  193  C   GLY A  63     8424  11237   7593   -121   -827    255       C  
ATOM    194  O   GLY A  63     -22.025 -19.304  16.645  1.00 73.43           O  
ANISOU  194  O   GLY A  63     8629  11485   7786   -148   -735    245       O  
ATOM    195  N   ASN A  64     -20.733 -17.795  17.703  1.00 74.18           N  
ANISOU  195  N   ASN A  64     8850  11629   7705   -235   -843    236       N  
ATOM    196  CA  ASN A  64     -21.761 -17.338  18.623  1.00 76.08           C  
ANISOU  196  CA  ASN A  64     9205  12011   7690   -371   -699    147       C  
ATOM    197  C   ASN A  64     -21.918 -15.843  18.452  1.00 75.11           C  
ANISOU  197  C   ASN A  64     9100  11928   7512   -293   -562    -53       C  
ATOM    198  O   ASN A  64     -21.070 -15.181  17.854  1.00 83.74           O  
ANISOU  198  O   ASN A  64    10155  12947   8714   -188   -622    -81       O  
ATOM    199  CB  ASN A  64     -21.421 -17.677  20.067  1.00 85.14           C  
ANISOU  199  CB  ASN A  64    10515  13222   8613   -621   -824    290       C  
ATOM    200  CG  ASN A  64     -21.539 -19.148  20.350  1.00 93.55           C  
ANISOU  200  CG  ASN A  64    11587  14246   9711   -721   -944    492       C  
ATOM    201  OD1 ASN A  64     -22.638 -19.668  20.513  1.00 93.95           O  
ANISOU  201  OD1 ASN A  64    11655  14363   9680   -794   -818    470       O  
ATOM    202  ND2 ASN A  64     -20.403 -19.834  20.417  1.00102.23           N  
ANISOU  202  ND2 ASN A  64    12668  15227  10948   -728  -1193    693       N  
ATOM    203  N   GLY A  65     -23.009 -15.305  18.963  1.00 71.93           N  
ANISOU  203  N   GLY A  65     8749  11630   6951   -347   -371   -198       N  
ATOM    204  CA  GLY A  65     -23.240 -13.882  18.864  1.00 74.82           C  
ANISOU  204  CA  GLY A  65     9136  12005   7286   -267   -234   -396       C  
ATOM    205  C   GLY A  65     -24.477 -13.533  19.646  1.00 75.91           C  
ANISOU  205  C   GLY A  65     9322  12264   7258   -355    -13   -550       C  
ATOM    206  O   GLY A  65     -25.138 -14.415  20.197  1.00 73.87           O  
ANISOU  206  O   GLY A  65     9075  12095   6898   -489     34   -495       O  
ATOM    207  N   SER A  66     -24.785 -12.246  19.708  1.00 78.87           N  
ANISOU  207  N   SER A  66     9724  12633   7611   -288    132   -749       N  
ATOM    208  CA  SER A  66     -25.987 -11.800  20.392  1.00 83.39           C  
ANISOU  208  CA  SER A  66    10311  13306   8068   -344    381   -940       C  
ATOM    209  C   SER A  66     -27.218 -12.378  19.697  1.00 84.76           C  
ANISOU  209  C   SER A  66    10290  13518   8397   -225    495   -965       C  
ATOM    210  O   SER A  66     -28.245 -12.626  20.333  1.00 76.92           O  
ANISOU  210  O   SER A  66     9275  12647   7305   -326    675  -1051       O  
ATOM    211  CB  SER A  66     -26.045 -10.273  20.424  1.00 87.76           C  
ANISOU  211  CB  SER A  66    10910  13796   8640   -248    508  -1158       C  
ATOM    212  OG  SER A  66     -25.918  -9.739  19.113  1.00 93.42           O  
ANISOU  212  OG  SER A  66    11503  14378   9614      1    450  -1167       O  
ATOM    213  N   PHE A  67     -27.079 -12.633  18.394  1.00 84.37           N  
ANISOU  213  N   PHE A  67    10103  13373   8579    -36    386   -886       N  
ATOM    214  CA  PHE A  67     -28.169 -13.152  17.579  1.00 77.97           C  
ANISOU  214  CA  PHE A  67     9106  12590   7928     74    456   -896       C  
ATOM    215  C   PHE A  67     -28.486 -14.604  17.931  1.00 82.28           C  
ANISOU  215  C   PHE A  67     9645  13221   8398    -86    427   -758       C  
ATOM    216  O   PHE A  67     -29.624 -15.054  17.788  1.00 88.94           O  
ANISOU  216  O   PHE A  67    10364  14146   9283    -90    544   -796       O  
ATOM    217  CB  PHE A  67     -27.813 -13.068  16.087  1.00 64.20           C  
ANISOU  217  CB  PHE A  67     7258  10724   6411    273    328   -838       C  
ATOM    218  CG  PHE A  67     -26.620 -13.884  15.714  1.00 62.69           C  
ANISOU  218  CG  PHE A  67     7116  10461   6244    237    130   -661       C  
ATOM    219  CD1 PHE A  67     -26.761 -15.220  15.368  1.00 65.61           C  
ANISOU  219  CD1 PHE A  67     7427  10836   6663    193     65   -535       C  
ATOM    220  CD2 PHE A  67     -25.351 -13.322  15.706  1.00 69.05           C  
ANISOU  220  CD2 PHE A  67     8014  11181   7040    246     13   -629       C  
ATOM    221  CE1 PHE A  67     -25.657 -15.981  15.035  1.00 73.00           C  
ANISOU  221  CE1 PHE A  67     8391  11682   7661    177   -103   -390       C  
ATOM    222  CE2 PHE A  67     -24.240 -14.078  15.375  1.00 67.09           C  
ANISOU  222  CE2 PHE A  67     7775  10866   6851    223   -157   -477       C  
ATOM    223  CZ  PHE A  67     -24.390 -15.408  15.042  1.00 71.59           C  
ANISOU  223  CZ  PHE A  67     8280  11428   7492    199   -211   -363       C  
ATOM    224  N   GLY A  68     -27.462 -15.344  18.350  1.00 77.46           N  
ANISOU  224  N   GLY A  68     9157  12578   7696   -218    255   -585       N  
ATOM    225  CA  GLY A  68     -27.594 -16.774  18.553  1.00 73.66           C  
ANISOU  225  CA  GLY A  68     8683  12123   7182   -354    180   -419       C  
ATOM    226  C   GLY A  68     -26.343 -17.516  18.110  1.00 74.36           C  
ANISOU  226  C   GLY A  68     8801  12076   7376   -331    -61   -228       C  
ATOM    227  O   GLY A  68     -25.233 -17.102  18.439  1.00 70.06           O  
ANISOU  227  O   GLY A  68     8348  11479   6794   -350   -183   -179       O  
ATOM    228  N   VAL A  69     -26.523 -18.598  17.348  1.00 70.62           N  
ANISOU  228  N   VAL A  69     8240  11541   7051   -290   -122   -133       N  
ATOM    229  CA  VAL A  69     -25.434 -19.513  17.012  1.00 65.97           C  
ANISOU  229  CA  VAL A  69     7666  10811   6589   -278   -326     41       C  
ATOM    230  C   VAL A  69     -25.347 -19.782  15.511  1.00 73.12           C  
ANISOU  230  C   VAL A  69     8438  11610   7736    -94   -342     12       C  
ATOM    231  O   VAL A  69     -26.380 -19.896  14.842  1.00 74.93           O  
ANISOU  231  O   VAL A  69     8573  11881   8015    -45   -232    -68       O  
ATOM    232  CB  VAL A  69     -25.602 -20.872  17.736  1.00 67.39           C  
ANISOU  232  CB  VAL A  69     7919  10987   6700   -469   -407    216       C  
ATOM    233  CG1 VAL A  69     -24.418 -21.785  17.443  1.00 67.48           C  
ANISOU  233  CG1 VAL A  69     7934  10819   6888   -435   -628    394       C  
ATOM    234  CG2 VAL A  69     -25.778 -20.679  19.259  1.00 62.62           C  
ANISOU  234  CG2 VAL A  69     7474  10512   5807   -707   -384    253       C  
ATOM    235  N   VAL A  70     -24.117 -19.886  14.990  1.00 67.58           N  
ANISOU  235  N   VAL A  70     7723  10777   7179     -8   -477     74       N  
ATOM    236  CA  VAL A  70     -23.894 -20.341  13.622  1.00 59.26           C  
ANISOU  236  CA  VAL A  70     6565   9613   6337    124   -490     52       C  
ATOM    237  C   VAL A  70     -23.233 -21.719  13.587  1.00 60.31           C  
ANISOU  237  C   VAL A  70     6697   9604   6612     90   -620    197       C  
ATOM    238  O   VAL A  70     -22.111 -21.892  14.032  1.00 60.98           O  
ANISOU  238  O   VAL A  70     6805   9607   6756     79   -759    302       O  
ATOM    239  CB  VAL A  70     -23.006 -19.377  12.811  1.00 55.99           C  
ANISOU  239  CB  VAL A  70     6111   9148   6016    260   -504    -26       C  
ATOM    240  CG1 VAL A  70     -22.884 -19.892  11.379  1.00 47.19           C  
ANISOU  240  CG1 VAL A  70     4906   7940   5084    358   -488    -67       C  
ATOM    241  CG2 VAL A  70     -23.585 -17.981  12.797  1.00 56.07           C  
ANISOU  241  CG2 VAL A  70     6131   9254   5920    308   -397   -160       C  
ATOM    242  N   TYR A  71     -23.933 -22.700  13.038  1.00 67.08           N  
ANISOU  242  N   TYR A  71     7520  10423   7546     74   -581    202       N  
ATOM    243  CA  TYR A  71     -23.387 -24.040  12.893  1.00 65.33           C  
ANISOU  243  CA  TYR A  71     7297  10029   7495     57   -688    318       C  
ATOM    244  C   TYR A  71     -22.850 -24.207  11.488  1.00 68.25           C  
ANISOU  244  C   TYR A  71     7576  10280   8078    198   -658    222       C  
ATOM    245  O   TYR A  71     -23.211 -23.463  10.573  1.00 70.27           O  
ANISOU  245  O   TYR A  71     7783  10603   8312    270   -552     82       O  
ATOM    246  CB  TYR A  71     -24.448 -25.104  13.176  1.00 68.65           C  
ANISOU  246  CB  TYR A  71     7759  10460   7867    -76   -661    380       C  
ATOM    247  CG  TYR A  71     -25.111 -24.977  14.532  1.00 73.72           C  
ANISOU  247  CG  TYR A  71     8497  11245   8268   -253   -653    456       C  
ATOM    248  CD1 TYR A  71     -26.196 -24.124  14.722  1.00 75.72           C  
ANISOU  248  CD1 TYR A  71     8731  11694   8346   -287   -493    333       C  
ATOM    249  CD2 TYR A  71     -24.672 -25.729  15.617  1.00 76.50           C  
ANISOU  249  CD2 TYR A  71     8959  11534   8575   -397   -802    651       C  
ATOM    250  CE1 TYR A  71     -26.809 -24.008  15.964  1.00 83.36           C  
ANISOU  250  CE1 TYR A  71     9784  12803   9086   -466   -446    372       C  
ATOM    251  CE2 TYR A  71     -25.283 -25.621  16.859  1.00 79.47           C  
ANISOU  251  CE2 TYR A  71     9445  12056   8692   -600   -780    716       C  
ATOM    252  CZ  TYR A  71     -26.347 -24.760  17.027  1.00 82.50           C  
ANISOU  252  CZ  TYR A  71     9807  12646   8892   -638   -584    561       C  
ATOM    253  OH  TYR A  71     -26.955 -24.649  18.256  1.00 92.44           O  
ANISOU  253  OH  TYR A  71    11174  14060   9889   -854   -525    594       O  
ATOM    254  N   GLN A  72     -21.950 -25.161  11.321  1.00 71.81           N  
ANISOU  254  N   GLN A  72     8003  10545   8738    230   -752    297       N  
ATOM    255  CA  GLN A  72     -21.573 -25.603   9.995  1.00 68.86           C  
ANISOU  255  CA  GLN A  72     7553  10044   8568    328   -689    187       C  
ATOM    256  C   GLN A  72     -22.135 -27.006   9.822  1.00 68.38           C  
ANISOU  256  C   GLN A  72     7522   9857   8602    262   -690    226       C  
ATOM    257  O   GLN A  72     -22.301 -27.724  10.807  1.00 67.94           O  
ANISOU  257  O   GLN A  72     7532   9754   8527    165   -793    383       O  
ATOM    258  CB  GLN A  72     -20.058 -25.609   9.808  1.00 63.44           C  
ANISOU  258  CB  GLN A  72     6787   9219   8097    433   -762    199       C  
ATOM    259  CG  GLN A  72     -19.655 -26.084   8.430  1.00 63.84           C  
ANISOU  259  CG  GLN A  72     6761   9142   8353    517   -658     54       C  
ATOM    260  CD  GLN A  72     -18.294 -26.703   8.414  1.00 69.91           C  
ANISOU  260  CD  GLN A  72     7432   9714   9418    606   -733     91       C  
ATOM    261  OE1 GLN A  72     -18.160 -27.894   8.679  1.00 76.36           O  
ANISOU  261  OE1 GLN A  72     8247  10349  10417    605   -806    178       O  
ATOM    262  NE2 GLN A  72     -17.272 -25.913   8.100  1.00 70.22           N  
ANISOU  262  NE2 GLN A  72     7379   9776   9527    684   -717     29       N  
ATOM    263  N   ALA A  73     -22.465 -27.389   8.593  1.00 66.48           N  
ANISOU  263  N   ALA A  73     7252   9565   8441    287   -580     89       N  
ATOM    264  CA  ALA A  73     -22.934 -28.741   8.337  1.00 61.41           C  
ANISOU  264  CA  ALA A  73     6649   8780   7906    217   -575    106       C  
ATOM    265  C   ALA A  73     -22.681 -29.139   6.878  1.00 63.98           C  
ANISOU  265  C   ALA A  73     6935   8991   8384    271   -461    -71       C  
ATOM    266  O   ALA A  73     -22.383 -28.299   6.029  1.00 63.32           O  
ANISOU  266  O   ALA A  73     6804   8984   8270    334   -376   -204       O  
ATOM    267  CB  ALA A  73     -24.396 -28.869   8.689  1.00 60.09           C  
ANISOU  267  CB  ALA A  73     6538   8759   7534     73   -540    137       C  
ATOM    268  N   LYS A  74     -22.781 -30.437   6.616  1.00 62.85           N  
ANISOU  268  N   LYS A  74     6829   8655   8398    226   -459    -72       N  
ATOM    269  CA  LYS A  74     -22.565 -31.001   5.300  1.00 60.26           C  
ANISOU  269  CA  LYS A  74     6490   8193   8215    246   -337   -255       C  
ATOM    270  C   LYS A  74     -23.876 -31.579   4.773  1.00 57.22           C  
ANISOU  270  C   LYS A  74     6181   7853   7707     95   -274   -311       C  
ATOM    271  O   LYS A  74     -24.466 -32.464   5.403  1.00 59.01           O  
ANISOU  271  O   LYS A  74     6473   8006   7943     -5   -339   -198       O  
ATOM    272  CB  LYS A  74     -21.473 -32.075   5.374  1.00 67.30           C  
ANISOU  272  CB  LYS A  74     7351   8778   9442    331   -377   -236       C  
ATOM    273  CG  LYS A  74     -21.131 -32.782   4.056  1.00 69.95           C  
ANISOU  273  CG  LYS A  74     7679   8936   9965    351   -220   -457       C  
ATOM    274  CD  LYS A  74     -20.036 -33.835   4.275  1.00 70.37           C  
ANISOU  274  CD  LYS A  74     7674   8658  10404    465   -265   -433       C  
ATOM    275  CE  LYS A  74     -20.140 -34.987   3.284  1.00 73.24           C  
ANISOU  275  CE  LYS A  74     8089   8789  10948    427   -125   -619       C  
ATOM    276  N   LEU A  75     -24.346 -31.076   3.632  1.00 58.75           N  
ANISOU  276  N   LEU A  75     6373   8173   7778     56   -163   -471       N  
ATOM    277  CA  LEU A  75     -25.561 -31.632   3.028  1.00 59.60           C  
ANISOU  277  CA  LEU A  75     6540   8328   7776   -103   -119   -528       C  
ATOM    278  C   LEU A  75     -25.314 -33.049   2.530  1.00 62.21           C  
ANISOU  278  C   LEU A  75     6940   8390   8306   -157    -71   -608       C  
ATOM    279  O   LEU A  75     -24.309 -33.313   1.881  1.00 69.47           O  
ANISOU  279  O   LEU A  75     7847   9140   9409    -74      8   -738       O  
ATOM    280  CB  LEU A  75     -26.056 -30.764   1.880  1.00 54.26           C  
ANISOU  280  CB  LEU A  75     5851   7839   6926   -145    -44   -662       C  
ATOM    281  CG  LEU A  75     -26.344 -29.298   2.199  1.00 55.56           C  
ANISOU  281  CG  LEU A  75     5949   8243   6917    -83    -84   -605       C  
ATOM    282  CD1 LEU A  75     -26.876 -28.597   0.947  1.00 51.24           C  
ANISOU  282  CD1 LEU A  75     5403   7843   6223   -143    -40   -718       C  
ATOM    283  CD2 LEU A  75     -27.316 -29.146   3.347  1.00 52.31           C  
ANISOU  283  CD2 LEU A  75     5513   7967   6397   -126   -156   -459       C  
ATOM    284  N   CYS A  76     -26.223 -33.963   2.841  1.00 65.33           N  
ANISOU  284  N   CYS A  76     7407   8739   8678   -300   -109   -541       N  
ATOM    285  CA  CYS A  76     -26.085 -35.346   2.393  1.00 68.92           C  
ANISOU  285  CA  CYS A  76     7948   8914   9324   -366    -67   -619       C  
ATOM    286  C   CYS A  76     -26.273 -35.470   0.882  1.00 76.89           C  
ANISOU  286  C   CYS A  76     9002   9926  10287   -453     77   -859       C  
ATOM    287  O   CYS A  76     -25.675 -36.334   0.248  1.00 81.23           O  
ANISOU  287  O   CYS A  76     9605  10225  11033   -449    170  -1007       O  
ATOM    288  CB  CYS A  76     -27.079 -36.243   3.111  1.00 61.27           C  
ANISOU  288  CB  CYS A  76     7058   7909   8313   -531   -148   -477       C  
ATOM    289  SG  CYS A  76     -26.690 -36.466   4.823  1.00 81.30           S  
ANISOU  289  SG  CYS A  76     9598  10362  10931   -478   -316   -199       S  
ATOM    290  N   ASP A  77     -27.132 -34.627   0.316  1.00 80.90           N  
ANISOU  290  N   ASP A  77     9492  10709  10537   -545     92   -899       N  
ATOM    291  CA  ASP A  77     -27.412 -34.674  -1.114  1.00 88.25           C  
ANISOU  291  CA  ASP A  77    10485  11679  11368   -672    198  -1101       C  
ATOM    292  C   ASP A  77     -26.153 -34.427  -1.953  1.00 97.80           C  
ANISOU  292  C   ASP A  77    11690  12782  12688   -569    330  -1286       C  
ATOM    293  O   ASP A  77     -25.808 -35.234  -2.822  1.00100.70           O  
ANISOU  293  O   ASP A  77    12140  12967  13154   -641    459  -1478       O  
ATOM    294  CB  ASP A  77     -28.492 -33.649  -1.477  1.00 85.33           C  
ANISOU  294  CB  ASP A  77    10071  11632  10718   -765    145  -1066       C  
ATOM    295  N   SER A  78     -25.465 -33.320  -1.674  1.00 96.00           N  
ANISOU  295  N   SER A  78    11367  12664  12444   -414    312  -1237       N  
ATOM    296  CA  SER A  78     -24.369 -32.848  -2.523  1.00 87.69           C  
ANISOU  296  CA  SER A  78    10293  11580  11443   -345    443  -1407       C  
ATOM    297  C   SER A  78     -22.991 -32.949  -1.880  1.00 81.92           C  
ANISOU  297  C   SER A  78     9465  10664  10995   -139    460  -1388       C  
ATOM    298  O   SER A  78     -21.976 -32.853  -2.562  1.00 79.11           O  
ANISOU  298  O   SER A  78     9076  10229  10755    -85    599  -1555       O  
ATOM    299  CB  SER A  78     -24.617 -31.392  -2.929  1.00 88.37           C  
ANISOU  299  CB  SER A  78    10350  11946  11279   -356    413  -1384       C  
ATOM    300  OG  SER A  78     -24.840 -30.573  -1.791  1.00 91.14           O  
ANISOU  300  OG  SER A  78    10616  12430  11584   -243    274  -1181       O  
ATOM    301  N   GLY A  79     -22.957 -33.131  -0.566  1.00 80.17           N  
ANISOU  301  N   GLY A  79     9193  10386  10881    -41    315  -1181       N  
ATOM    302  CA  GLY A  79     -21.708 -33.102   0.167  1.00 72.67           C  
ANISOU  302  CA  GLY A  79     8135   9294  10182    146    275  -1113       C  
ATOM    303  C   GLY A  79     -21.272 -31.671   0.424  1.00 70.04           C  
ANISOU  303  C   GLY A  79     7718   9175   9721    233    236  -1053       C  
ATOM    304  O   GLY A  79     -20.233 -31.434   1.033  1.00 72.49           O  
ANISOU  304  O   GLY A  79     7926   9416  10201    375    186   -987       O  
ATOM    305  N   GLU A  80     -22.060 -30.712  -0.053  1.00 67.82           N  
ANISOU  305  N   GLU A  80     7476   9143   9150    145    245  -1070       N  
ATOM    306  CA  GLU A  80     -21.731 -29.295   0.096  1.00 67.74           C  
ANISOU  306  CA  GLU A  80     7408   9323   9007    213    212  -1024       C  
ATOM    307  C   GLU A  80     -21.765 -28.830   1.547  1.00 67.31           C  
ANISOU  307  C   GLU A  80     7307   9330   8936    296     54   -811       C  
ATOM    308  O   GLU A  80     -22.566 -29.320   2.350  1.00 70.16           O  
ANISOU  308  O   GLU A  80     7704   9695   9258    248    -35   -684       O  
ATOM    309  CB  GLU A  80     -22.685 -28.439  -0.739  1.00 66.53           C  
ANISOU  309  CB  GLU A  80     7315   9393   8571     96    231  -1071       C  
ATOM    310  N   LEU A  81     -20.886 -27.891   1.886  1.00 68.02           N  
ANISOU  310  N   LEU A  81     7327   9475   9044    397     26   -778       N  
ATOM    311  CA  LEU A  81     -20.860 -27.325   3.239  1.00 65.48           C  
ANISOU  311  CA  LEU A  81     6980   9228   8672    453   -116   -594       C  
ATOM    312  C   LEU A  81     -21.769 -26.113   3.348  1.00 61.23           C  
ANISOU  312  C   LEU A  81     6474   8923   7867    416   -139   -562       C  
ATOM    313  O   LEU A  81     -21.803 -25.264   2.464  1.00 61.40           O  
ANISOU  313  O   LEU A  81     6502   9045   7784    405    -76   -657       O  
ATOM    314  CB  LEU A  81     -19.443 -26.931   3.640  1.00 63.87           C  
ANISOU  314  CB  LEU A  81     6681   8959   8629    567   -153   -567       C  
ATOM    315  CG  LEU A  81     -18.400 -28.034   3.815  1.00 64.91           C  
ANISOU  315  CG  LEU A  81     6732   8843   9087    646   -171   -560       C  
ATOM    316  CD1 LEU A  81     -17.058 -27.395   4.087  1.00 59.72           C  
ANISOU  316  CD1 LEU A  81     5950   8175   8564    748   -207   -542       C  
ATOM    317  CD2 LEU A  81     -18.779 -28.962   4.949  1.00 65.05           C  
ANISOU  317  CD2 LEU A  81     6791   8752   9172    626   -321   -374       C  
ATOM    318  N   VAL A  82     -22.489 -26.015   4.453  1.00 64.17           N  
ANISOU  318  N   VAL A  82     6868   9376   8138    391   -228   -427       N  
ATOM    319  CA  VAL A  82     -23.374 -24.877   4.671  1.00 56.96           C  
ANISOU  319  CA  VAL A  82     5964   8666   7012    375   -237   -408       C  
ATOM    320  C   VAL A  82     -23.149 -24.295   6.042  1.00 49.93           C  
ANISOU  320  C   VAL A  82     5074   7832   6065    407   -320   -289       C  
ATOM    321  O   VAL A  82     -22.672 -24.980   6.938  1.00 57.48           O  
ANISOU  321  O   VAL A  82     6041   8694   7105    399   -395   -182       O  
ATOM    322  CB  VAL A  82     -24.857 -25.274   4.529  1.00 59.30           C  
ANISOU  322  CB  VAL A  82     6280   9051   7199    273   -220   -404       C  
ATOM    323  CG1 VAL A  82     -25.187 -25.653   3.088  1.00 56.24           C  
ANISOU  323  CG1 VAL A  82     5909   8644   6815    210   -151   -528       C  
ATOM    324  CG2 VAL A  82     -25.207 -26.401   5.515  1.00 51.89           C  
ANISOU  324  CG2 VAL A  82     5371   8042   6303    202   -269   -293       C  
ATOM    325  N   ALA A  83     -23.462 -23.019   6.203  1.00 49.68           N  
ANISOU  325  N   ALA A  83     5041   7943   5892    435   -313   -304       N  
ATOM    326  CA  ALA A  83     -23.539 -22.434   7.538  1.00 51.55           C  
ANISOU  326  CA  ALA A  83     5301   8259   6026    430   -366   -217       C  
ATOM    327  C   ALA A  83     -25.004 -22.315   7.898  1.00 63.95           C  
ANISOU  327  C   ALA A  83     6873   9965   7460    368   -323   -215       C  
ATOM    328  O   ALA A  83     -25.807 -21.799   7.114  1.00 74.33           O  
ANISOU  328  O   ALA A  83     8151  11360   8731    384   -271   -292       O  
ATOM    329  CB  ALA A  83     -22.854 -21.073   7.602  1.00 46.87           C  
ANISOU  329  CB  ALA A  83     4709   7713   5385    500   -374   -251       C  
ATOM    330  N   ILE A  84     -25.374 -22.835   9.058  1.00 60.04           N  
ANISOU  330  N   ILE A  84     6412   9496   6904    283   -349   -123       N  
ATOM    331  CA  ILE A  84     -26.734 -22.668   9.517  1.00 54.81           C  
ANISOU  331  CA  ILE A  84     5732   8981   6113    213   -283   -134       C  
ATOM    332  C   ILE A  84     -26.775 -21.636  10.645  1.00 60.39           C  
ANISOU  332  C   ILE A  84     6469   9795   6682    211   -262   -134       C  
ATOM    333  O   ILE A  84     -26.286 -21.886  11.750  1.00 61.80           O  
ANISOU  333  O   ILE A  84     6724   9960   6798    134   -315    -42       O  
ATOM    334  CB  ILE A  84     -27.343 -23.992  10.023  1.00 59.10           C  
ANISOU  334  CB  ILE A  84     6303   9504   6648     73   -292    -47       C  
ATOM    335  CG1 ILE A  84     -27.149 -25.116   9.013  1.00 56.77           C  
ANISOU  335  CG1 ILE A  84     6004   9062   6502     64   -315    -54       C  
ATOM    336  CG2 ILE A  84     -28.832 -23.817  10.373  1.00 58.02           C  
ANISOU  336  CG2 ILE A  84     6112   9542   6390    -11   -197    -81       C  
ATOM    337  CD1 ILE A  84     -27.797 -26.411   9.465  1.00 55.58           C  
ANISOU  337  CD1 ILE A  84     5895   8873   6350    -86   -329     33       C  
ATOM    338  N   LYS A  85     -27.371 -20.482  10.367  1.00 56.12           N  
ANISOU  338  N   LYS A  85     5876   9351   6097    284   -190   -235       N  
ATOM    339  CA  LYS A  85     -27.563 -19.458  11.384  1.00 50.62           C  
ANISOU  339  CA  LYS A  85     5207   8748   5278    282   -135   -275       C  
ATOM    340  C   LYS A  85     -28.891 -19.674  12.087  1.00 52.32           C  
ANISOU  340  C   LYS A  85     5379   9100   5401    185    -27   -299       C  
ATOM    341  O   LYS A  85     -29.936 -19.666  11.449  1.00 55.99           O  
ANISOU  341  O   LYS A  85     5729   9627   5916    213     32   -356       O  
ATOM    342  CB  LYS A  85     -27.503 -18.061  10.766  1.00 52.51           C  
ANISOU  342  CB  LYS A  85     5414   8991   5547    420   -111   -377       C  
ATOM    343  CG  LYS A  85     -27.721 -16.940  11.771  1.00 55.16           C  
ANISOU  343  CG  LYS A  85     5784   9397   5775    427    -35   -450       C  
ATOM    344  CD  LYS A  85     -27.681 -15.596  11.074  1.00 59.23           C  
ANISOU  344  CD  LYS A  85     6274   9878   6352    569    -26   -541       C  
ATOM    345  CE  LYS A  85     -27.756 -14.473  12.082  1.00 67.38           C  
ANISOU  345  CE  LYS A  85     7363  10945   7295    577     54   -631       C  
ATOM    346  NZ  LYS A  85     -27.431 -13.168  11.451  1.00 74.14           N  
ANISOU  346  NZ  LYS A  85     8231  11719   8218    706     32   -697       N  
ATOM    347  N   LYS A  86     -28.846 -19.912  13.397  1.00 56.21           N  
ANISOU  347  N   LYS A  86     5959   9645   5753     50     -6   -250       N  
ATOM    348  CA  LYS A  86     -30.048 -20.231  14.172  1.00 54.68           C  
ANISOU  348  CA  LYS A  86     5734   9594   5449    -85    118   -272       C  
ATOM    349  C   LYS A  86     -30.406 -19.084  15.099  1.00 59.84           C  
ANISOU  349  C   LYS A  86     6402  10359   5974    -95    253   -393       C  
ATOM    350  O   LYS A  86     -29.656 -18.771  16.017  1.00 66.39           O  
ANISOU  350  O   LYS A  86     7369  11182   6673   -168    225   -367       O  
ATOM    351  CB  LYS A  86     -29.829 -21.516  14.973  1.00 54.22           C  
ANISOU  351  CB  LYS A  86     5785   9513   5302   -282     51   -118       C  
ATOM    352  CG  LYS A  86     -31.051 -22.096  15.646  1.00 59.73           C  
ANISOU  352  CG  LYS A  86     6457  10352   5885   -464    173   -119       C  
ATOM    353  CD  LYS A  86     -30.656 -23.311  16.469  1.00 69.58           C  
ANISOU  353  CD  LYS A  86     7854  11548   7036   -672     70     65       C  
ATOM    354  CE  LYS A  86     -31.858 -24.105  16.958  1.00 79.42           C  
ANISOU  354  CE  LYS A  86     9080  12917   8180   -881    178     88       C  
ATOM    355  NZ  LYS A  86     -31.452 -25.354  17.684  1.00 85.63           N  
ANISOU  355  NZ  LYS A  86    10032  13619   8883  -1094     46    297       N  
ATOM    356  N   VAL A  87     -31.571 -18.485  14.892  1.00 64.69           N  
ANISOU  356  N   VAL A  87     6873  11074   6632    -32    399   -527       N  
ATOM    357  CA  VAL A  87     -31.981 -17.336  15.701  1.00 66.78           C  
ANISOU  357  CA  VAL A  87     7133  11426   6816    -17    560   -681       C  
ATOM    358  C   VAL A  87     -33.365 -17.585  16.306  1.00 70.15           C  
ANISOU  358  C   VAL A  87     7444  12021   7188   -131    757   -767       C  
ATOM    359  O   VAL A  87     -34.219 -18.217  15.688  1.00 70.81           O  
ANISOU  359  O   VAL A  87     7378  12152   7375   -132    768   -745       O  
ATOM    360  CB  VAL A  87     -32.010 -16.015  14.878  1.00 58.49           C  
ANISOU  360  CB  VAL A  87     5993  10307   5924    217    568   -799       C  
ATOM    361  CG1 VAL A  87     -30.670 -15.765  14.224  1.00 58.73           C  
ANISOU  361  CG1 VAL A  87     6126  10186   6001    307    392   -721       C  
ATOM    362  CG2 VAL A  87     -33.083 -16.062  13.814  1.00 57.37           C  
ANISOU  362  CG2 VAL A  87     5638  10193   5967    331    582   -830       C  
ATOM    363  N   LEU A  88     -33.564 -17.123  17.537  1.00 79.10           N  
ANISOU  363  N   LEU A  88     8652  13254   8149   -252    918   -869       N  
ATOM    364  CA  LEU A  88     -34.864 -17.215  18.194  1.00 72.26           C  
ANISOU  364  CA  LEU A  88     7666  12564   7226   -370   1152   -989       C  
ATOM    365  C   LEU A  88     -35.842 -16.484  17.284  1.00 75.20           C  
ANISOU  365  C   LEU A  88     7771  12944   7856   -141   1233  -1125       C  
ATOM    366  O   LEU A  88     -35.553 -15.381  16.823  1.00 75.19           O  
ANISOU  366  O   LEU A  88     7745  12842   7984     66   1207  -1209       O  
ATOM    367  CB  LEU A  88     -34.817 -16.600  19.604  1.00 69.24           C  
ANISOU  367  CB  LEU A  88     7423  12275   6611   -525   1336  -1121       C  
ATOM    368  CG  LEU A  88     -35.723 -17.147  20.721  1.00 72.25           C  
ANISOU  368  CG  LEU A  88     7809  12856   6788   -802   1557  -1179       C  
ATOM    369  N   GLN A  89     -36.987 -17.102  17.005  1.00 79.23           N  
ANISOU  369  N   GLN A  89     8084  13569   8452   -187   1309  -1131       N  
ATOM    370  CA  GLN A  89     -37.980 -16.466  16.154  1.00 84.59           C  
ANISOU  370  CA  GLN A  89     8482  14264   9393     18   1357  -1236       C  
ATOM    371  C   GLN A  89     -39.126 -15.982  16.987  1.00 94.26           C  
ANISOU  371  C   GLN A  89     9533  15647  10634    -21   1646  -1440       C  
ATOM    372  O   GLN A  89     -39.881 -16.761  17.569  1.00100.56           O  
ANISOU  372  O   GLN A  89    10265  16609  11335   -228   1786  -1449       O  
ATOM    373  CB  GLN A  89     -38.510 -17.429  15.087  1.00 88.47           C  
ANISOU  373  CB  GLN A  89     8831  14773  10012      8   1221  -1106       C  
ATOM    374  CG  GLN A  89     -39.729 -16.911  14.295  1.00 91.14           C  
ANISOU  374  CG  GLN A  89     8846  15167  10614    173   1258  -1192       C  
ATOM    375  CD  GLN A  89     -39.438 -15.662  13.470  1.00100.14           C  
ANISOU  375  CD  GLN A  89     9937  16162  11950    452   1152  -1235       C  
ATOM    376  OE1 GLN A  89     -38.984 -15.756  12.324  1.00109.45           O  
ANISOU  376  OE1 GLN A  89    11148  17231  13206    539    932  -1114       O  
ATOM    377  NE2 GLN A  89     -39.714 -14.488  14.039  1.00 97.65           N  
ANISOU  377  NE2 GLN A  89     9552  15838  11715    579   1314  -1411       N  
ATOM    378  N   ASP A  90     -39.268 -14.670  17.011  1.00101.50           N  
ANISOU  378  N   ASP A  90    10369  16505  11691    180   1744  -1613       N  
ATOM    379  CA  ASP A  90     -40.250 -14.057  17.860  1.00114.28           C  
ANISOU  379  CA  ASP A  90    11828  18247  13348    168   2052  -1851       C  
ATOM    380  C   ASP A  90     -40.934 -12.928  17.138  1.00117.48           C  
ANISOU  380  C   ASP A  90    11963  18568  14104    474   2076  -1981       C  
ATOM    381  O   ASP A  90     -40.283 -11.954  16.765  1.00114.83           O  
ANISOU  381  O   ASP A  90    11715  18053  13862    668   1976  -2002       O  
ATOM    382  N   LYS A  91     -42.236 -13.024  16.916  1.00123.04           N  
ANISOU  382  N   LYS A  91    12334  19393  15023    521   2193  -2057       N  
ATOM    383  CA  LYS A  91     -43.121 -14.166  17.165  1.00127.99           C  
ANISOU  383  CA  LYS A  91    12812  20234  15584    299   2294  -2020       C  
ATOM    384  C   LYS A  91     -44.360 -13.556  16.558  1.00130.33           C  
ANISOU  384  C   LYS A  91    12695  20560  16264    521   2354  -2131       C  
ATOM    385  O   LYS A  91     -45.180 -14.205  15.896  1.00128.72           O  
ANISOU  385  O   LYS A  91    12250  20455  16202    498   2272  -2039       O  
ATOM    386  CB  LYS A  91     -43.322 -14.522  18.645  1.00129.96           C  
ANISOU  386  CB  LYS A  91    13168  20660  15551     10   2600  -2156       C  
ATOM    387  N   ARG A  92     -44.445 -12.255  16.825  1.00125.70           N  
ANISOU  387  N   ARG A  92    12076  19831  15853    730   2469  -2308       N  
ATOM    388  CA  ARG A  92     -45.415 -11.352  16.251  1.00116.19           C  
ANISOU  388  CA  ARG A  92    10587  18494  15066    996   2453  -2364       C  
ATOM    389  C   ARG A  92     -45.245 -11.341  14.737  1.00116.95           C  
ANISOU  389  C   ARG A  92    10566  18513  15359   1184   2103  -2169       C  
ATOM    390  O   ARG A  92     -46.085 -11.857  14.000  1.00121.74           O  
ANISOU  390  O   ARG A  92    10938  19183  16134   1184   1980  -2052       O  
ATOM    391  CB  ARG A  92     -45.246  -9.948  16.826  1.00104.40           C  
ANISOU  391  CB  ARG A  92     9171  16809  13687   1175   2610  -2565       C  
ATOM    392  N   PHE A  93     -44.120 -10.805  14.275  1.00116.10           N  
ANISOU  392  N   PHE A  93    10660  18257  15195   1310   1926  -2114       N  
ATOM    393  CA  PHE A  93     -43.932 -10.565  12.847  1.00114.46           C  
ANISOU  393  CA  PHE A  93    10413  17904  15172   1485   1581  -1918       C  
ATOM    394  C   PHE A  93     -42.891 -11.463  12.182  1.00104.36           C  
ANISOU  394  C   PHE A  93     9419  16595  13639   1336   1326  -1683       C  
ATOM    395  O   PHE A  93     -42.269 -12.322  12.812  1.00106.88           O  
ANISOU  395  O   PHE A  93     9965  16987  13659   1112   1388  -1650       O  
ATOM    396  CB  PHE A  93     -43.545  -9.099  12.615  1.00112.90           C  
ANISOU  396  CB  PHE A  93    10260  17465  15173   1755   1527  -1992       C  
ATOM    397  N   LYS A  94     -42.728 -11.251  10.884  1.00 95.04           N  
ANISOU  397  N   LYS A  94     8219  15299  12594   1460   1036  -1520       N  
ATOM    398  CA  LYS A  94     -41.762 -11.990  10.088  1.00 83.96           C  
ANISOU  398  CA  LYS A  94     7060  13846  10994   1346    801  -1321       C  
ATOM    399  C   LYS A  94     -40.362 -11.508  10.409  1.00 79.05           C  
ANISOU  399  C   LYS A  94     6770  13072  10193   1357    786  -1328       C  
ATOM    400  O   LYS A  94     -40.144 -10.342  10.753  1.00 77.76           O  
ANISOU  400  O   LYS A  94     6641  12785  10119   1512    853  -1441       O  
ATOM    401  CB  LYS A  94     -42.049 -11.833   8.588  1.00 78.05           C  
ANISOU  401  CB  LYS A  94     6197  13032  10427   1449    508  -1159       C  
ATOM    402  N   ASN A  95     -39.423 -12.437  10.383  1.00 53.35           N  
ANISOU  402  N   ASN A  95     3753   9826   6691   1184    714  -1218       N  
ATOM    403  CA  ASN A  95     -38.047 -12.086  10.610  1.00 56.18           C  
ANISOU  403  CA  ASN A  95     4402  10053   6889   1179    672  -1203       C  
ATOM    404  C   ASN A  95     -37.517 -11.181   9.481  1.00 62.54           C  
ANISOU  404  C   ASN A  95     5264  10683   7817   1345    464  -1128       C  
ATOM    405  O   ASN A  95     -37.450 -11.600   8.323  1.00 63.58           O  
ANISOU  405  O   ASN A  95     5388  10798   7974   1329    270   -988       O  
ATOM    406  CB  ASN A  95     -37.206 -13.354  10.720  1.00 57.29           C  
ANISOU  406  CB  ASN A  95     4741  10231   6795    972    617  -1086       C  
ATOM    407  CG  ASN A  95     -35.733 -13.060  10.922  1.00 63.12           C  
ANISOU  407  CG  ASN A  95     5751  10842   7389    961    555  -1056       C  
ATOM    408  OD1 ASN A  95     -35.017 -12.693   9.988  1.00 69.44           O  
ANISOU  408  OD1 ASN A  95     6634  11520   8229   1041    391   -980       O  
ATOM    409  ND2 ASN A  95     -35.269 -13.242  12.137  1.00 60.83           N  
ANISOU  409  ND2 ASN A  95     5601  10591   6922    841    680  -1107       N  
ATOM    410  N   ARG A  96     -37.090  -9.972   9.843  1.00 65.27           N  
ANISOU  410  N   ARG A  96     5692  10896   8210   1474    509  -1222       N  
ATOM    411  CA  ARG A  96     -36.610  -8.967   8.896  1.00 58.30           C  
ANISOU  411  CA  ARG A  96     4876   9833   7444   1622    327  -1158       C  
ATOM    412  C   ARG A  96     -35.418  -9.462   8.087  1.00 60.58           C  
ANISOU  412  C   ARG A  96     5377  10070   7569   1521    148  -1006       C  
ATOM    413  O   ARG A  96     -35.322  -9.213   6.887  1.00 67.14           O  
ANISOU  413  O   ARG A  96     6211  10826   8472   1567    -45   -892       O  
ATOM    414  CB  ARG A  96     -36.232  -7.671   9.625  1.00 54.54           C  
ANISOU  414  CB  ARG A  96     4498   9216   7011   1738    434  -1303       C  
ATOM    415  CG  ARG A  96     -35.848  -6.550   8.680  1.00 55.46           C  
ANISOU  415  CG  ARG A  96     4677   9127   7269   1890    247  -1234       C  
ATOM    416  CD  ARG A  96     -35.362  -5.309   9.373  1.00 52.49           C  
ANISOU  416  CD  ARG A  96     4433   8587   6922   1982    344  -1373       C  
ATOM    417  NE  ARG A  96     -36.422  -4.529   9.986  1.00 55.52           N  
ANISOU  417  NE  ARG A  96     4627   8929   7540   2143    513  -1553       N  
ATOM    418  CZ  ARG A  96     -36.214  -3.491  10.794  1.00 72.15           C  
ANISOU  418  CZ  ARG A  96     6826  10901   9688   2218    662  -1733       C  
ATOM    419  NH1 ARG A  96     -34.971  -3.117  11.077  1.00 77.55           N  
ANISOU  419  NH1 ARG A  96     7796  11493  10178   2131    639  -1736       N  
ATOM    420  NH2 ARG A  96     -37.244  -2.823  11.323  1.00 68.64           N  
ANISOU  420  NH2 ARG A  96     6181  10410   9488   2374    841  -1922       N  
ATOM    421  N   GLU A  97     -34.508 -10.161   8.742  1.00 60.53           N  
ANISOU  421  N   GLU A  97     5546  10104   7349   1373    210  -1005       N  
ATOM    422  CA  GLU A  97     -33.330 -10.679   8.064  1.00 55.19           C  
ANISOU  422  CA  GLU A  97     5046   9377   6546   1283     72   -885       C  
ATOM    423  C   GLU A  97     -33.699 -11.688   6.972  1.00 57.94           C  
ANISOU  423  C   GLU A  97     5318   9788   6908   1210    -48   -770       C  
ATOM    424  O   GLU A  97     -33.066 -11.741   5.915  1.00 59.17           O  
ANISOU  424  O   GLU A  97     5563   9878   7041   1188   -189   -682       O  
ATOM    425  CB  GLU A  97     -32.384 -11.329   9.072  1.00 44.46           C  
ANISOU  425  CB  GLU A  97     3849   8051   4994   1145    153   -897       C  
ATOM    426  CG  GLU A  97     -31.054 -11.838   8.491  1.00 52.18           C  
ANISOU  426  CG  GLU A  97     4986   8964   5877   1067     31   -794       C  
ATOM    427  CD  GLU A  97     -30.143 -12.405   9.577  1.00 64.25           C  
ANISOU  427  CD  GLU A  97     6649  10511   7251    946     84   -790       C  
ATOM    428  OE1 GLU A  97     -30.586 -12.453  10.751  1.00 65.37           O  
ANISOU  428  OE1 GLU A  97     6783  10731   7324    894    211   -859       O  
ATOM    429  OE2 GLU A  97     -28.991 -12.787   9.267  1.00 71.52           O  
ANISOU  429  OE2 GLU A  97     7677  11373   8124    894     -3   -718       O  
ATOM    430  N   LEU A  98     -34.695 -12.515   7.258  1.00 56.69           N  
ANISOU  430  N   LEU A  98     5008   9762   6770   1146     22   -781       N  
ATOM    431  CA  LEU A  98     -35.114 -13.550   6.328  1.00 61.62           C  
ANISOU  431  CA  LEU A  98     5566  10453   7394   1048    -79   -686       C  
ATOM    432  C   LEU A  98     -35.750 -12.914   5.088  1.00 63.31           C  
ANISOU  432  C   LEU A  98     5665  10636   7754   1139   -243   -624       C  
ATOM    433  O   LEU A  98     -35.442 -13.272   3.944  1.00 61.42           O  
ANISOU  433  O   LEU A  98     5493  10371   7471   1069   -391   -532       O  
ATOM    434  CB  LEU A  98     -36.094 -14.504   7.006  1.00 60.95           C  
ANISOU  434  CB  LEU A  98     5339  10520   7300    943     39   -715       C  
ATOM    435  CG  LEU A  98     -36.619 -15.584   6.066  1.00 63.70           C  
ANISOU  435  CG  LEU A  98     5618  10935   7651    823    -65   -626       C  
ATOM    436  CD1 LEU A  98     -35.449 -16.373   5.465  1.00 59.81           C  
ANISOU  436  CD1 LEU A  98     5337  10357   7031    719   -148   -557       C  
ATOM    437  CD2 LEU A  98     -37.616 -16.495   6.776  1.00 60.44           C  
ANISOU  437  CD2 LEU A  98     5062  10673   7229    701     57   -653       C  
ATOM    438  N   GLN A  99     -36.615 -11.943   5.350  1.00 54.86           N  
ANISOU  438  N   GLN A  99     4426   9560   6860   1290   -216   -680       N  
ATOM    439  CA  GLN A  99     -37.330 -11.203   4.334  1.00 58.64           C  
ANISOU  439  CA  GLN A  99     4767   9995   7520   1400   -389   -608       C  
ATOM    440  C   GLN A  99     -36.328 -10.501   3.414  1.00 66.05           C  
ANISOU  440  C   GLN A  99     5907  10781   8407   1424   -554   -524       C  
ATOM    441  O   GLN A  99     -36.454 -10.549   2.186  1.00 66.18           O  
ANISOU  441  O   GLN A  99     5930  10787   8427   1376   -749   -402       O  
ATOM    442  CB  GLN A  99     -38.285 -10.213   5.018  1.00 59.53           C  
ANISOU  442  CB  GLN A  99     4665  10091   7865   1587   -293   -712       C  
ATOM    443  CG  GLN A  99     -38.928  -9.159   4.156  1.00 69.10           C  
ANISOU  443  CG  GLN A  99     5734  11201   9321   1754   -481   -640       C  
ATOM    444  CD  GLN A  99     -40.127  -8.495   4.847  1.00 78.33           C  
ANISOU  444  CD  GLN A  99     6608  12382  10772   1933   -361   -758       C  
ATOM    445  N   ILE A 100     -35.291  -9.922   4.009  1.00 61.15           N  
ANISOU  445  N   ILE A 100     5466  10057   7711   1461   -473   -586       N  
ATOM    446  CA  ILE A 100     -34.261  -9.248   3.230  1.00 63.81           C  
ANISOU  446  CA  ILE A 100     6000  10258   7987   1461   -603   -516       C  
ATOM    447  C   ILE A 100     -33.395 -10.236   2.433  1.00 60.63           C  
ANISOU  447  C   ILE A 100     5749   9891   7397   1280   -663   -443       C  
ATOM    448  O   ILE A 100     -33.146 -10.011   1.258  1.00 61.69           O  
ANISOU  448  O   ILE A 100     5960   9980   7500   1230   -819   -348       O  
ATOM    449  CB  ILE A 100     -33.377  -8.360   4.127  1.00 59.53           C  
ANISOU  449  CB  ILE A 100     5601   9600   7416   1532   -497   -610       C  
ATOM    450  CG1 ILE A 100     -34.109  -7.045   4.391  1.00 56.64           C  
ANISOU  450  CG1 ILE A 100     5130   9123   7269   1726   -499   -664       C  
ATOM    451  CG2 ILE A 100     -32.048  -8.071   3.462  1.00 43.57           C  
ANISOU  451  CG2 ILE A 100     3805   7481   5268   1459   -589   -545       C  
ATOM    452  CD1 ILE A 100     -33.340  -6.045   5.230  1.00 56.74           C  
ANISOU  452  CD1 ILE A 100     5292   9001   7265   1792   -400   -770       C  
ATOM    453  N   MET A 101     -32.956 -11.328   3.057  1.00 53.64           N  
ANISOU  453  N   MET A 101     4907   9080   6393   1174   -539   -489       N  
ATOM    454  CA  MET A 101     -32.142 -12.314   2.347  1.00 52.24           C  
ANISOU  454  CA  MET A 101     4854   8914   6080   1020   -572   -446       C  
ATOM    455  C   MET A 101     -32.861 -13.073   1.230  1.00 60.02           C  
ANISOU  455  C   MET A 101     5774   9974   7056    912   -679   -377       C  
ATOM    456  O   MET A 101     -32.242 -13.467   0.246  1.00 69.47           O  
ANISOU  456  O   MET A 101     7091  11150   8155    795   -742   -341       O  
ATOM    457  CB  MET A 101     -31.597 -13.325   3.327  1.00 53.75           C  
ANISOU  457  CB  MET A 101     5090   9143   6189    948   -434   -498       C  
ATOM    458  CG  MET A 101     -30.648 -12.714   4.333  1.00 60.99           C  
ANISOU  458  CG  MET A 101     6111   9993   7069   1001   -354   -551       C  
ATOM    459  SD  MET A 101     -29.239 -13.755   4.588  1.00 81.87           S  
ANISOU  459  SD  MET A 101     8891  12608   9607    885   -315   -541       S  
ATOM    460  CE  MET A 101     -28.455 -13.593   2.983  1.00 78.92           C  
ANISOU  460  CE  MET A 101     8610  12164   9211    836   -418   -501       C  
ATOM    461  N   ARG A 102     -34.168 -13.246   1.356  1.00 61.25           N  
ANISOU  461  N   ARG A 102     5738  10222   7314    937   -697   -366       N  
ATOM    462  CA  ARG A 102     -34.927 -13.962   0.337  1.00 58.62           C  
ANISOU  462  CA  ARG A 102     5332   9971   6967    815   -815   -296       C  
ATOM    463  C   ARG A 102     -35.023 -13.180  -0.969  1.00 62.45           C  
ANISOU  463  C   ARG A 102     5857  10411   7461    806  -1023   -193       C  
ATOM    464  O   ARG A 102     -35.305 -13.753  -2.007  1.00 68.33           O  
ANISOU  464  O   ARG A 102     6622  11210   8131    655  -1139   -130       O  
ATOM    465  CB  ARG A 102     -36.329 -14.276   0.842  1.00 53.97           C  
ANISOU  465  CB  ARG A 102     4498   9504   6503    839   -787   -306       C  
ATOM    466  CG  ARG A 102     -36.414 -15.483   1.737  1.00 54.96           C  
ANISOU  466  CG  ARG A 102     4605   9711   6567    741   -624   -369       C  
ATOM    467  CD  ARG A 102     -37.866 -15.810   1.983  1.00 60.28           C  
ANISOU  467  CD  ARG A 102     5025  10524   7355    724   -614   -368       C  
ATOM    468  NE  ARG A 102     -38.336 -16.857   1.083  1.00 71.52           N  
ANISOU  468  NE  ARG A 102     6430  12024   8722    539   -714   -308       N  
ATOM    469  CZ  ARG A 102     -39.569 -17.340   1.080  1.00 75.99           C  
ANISOU  469  CZ  ARG A 102     6782  12723   9366    471   -734   -290       C  
ATOM    470  NH1 ARG A 102     -40.476 -16.856   1.916  1.00 81.12           N  
ANISOU  470  NH1 ARG A 102     7197  13451  10173    584   -647   -334       N  
ATOM    471  NH2 ARG A 102     -39.889 -18.302   0.235  1.00 79.46           N  
ANISOU  471  NH2 ARG A 102     7240  13220   9731    278   -831   -240       N  
ATOM    472  N   LYS A 103     -34.831 -11.869  -0.919  1.00 59.82           N  
ANISOU  472  N   LYS A 103     5544   9973   7211    950  -1081   -169       N  
ATOM    473  CA  LYS A 103     -34.928 -11.094  -2.134  1.00 63.16           C  
ANISOU  473  CA  LYS A 103     6021  10339   7637    927  -1302    -44       C  
ATOM    474  C   LYS A 103     -33.539 -10.719  -2.679  1.00 68.70           C  
ANISOU  474  C   LYS A 103     6983  10942   8180    849  -1307    -35       C  
ATOM    475  O   LYS A 103     -33.434 -10.091  -3.733  1.00 75.92           O  
ANISOU  475  O   LYS A 103     7993  11805   9047    786  -1483     74       O  
ATOM    476  CB  LYS A 103     -35.818  -9.864  -1.925  1.00 64.52           C  
ANISOU  476  CB  LYS A 103     6025  10443   8046   1130  -1409      6       C  
ATOM    477  CG  LYS A 103     -35.308  -8.755  -1.053  1.00 63.57           C  
ANISOU  477  CG  LYS A 103     5952  10181   8020   1311  -1313    -66       C  
ATOM    478  CD  LYS A 103     -36.429  -7.700  -0.897  1.00 64.83           C  
ANISOU  478  CD  LYS A 103     5898  10269   8466   1520  -1414    -31       C  
ATOM    479  N   LEU A 104     -32.479 -11.133  -1.984  1.00 56.72           N  
ANISOU  479  N   LEU A 104     5571   9402   6576    834  -1124   -141       N  
ATOM    480  CA  LEU A 104     -31.117 -10.868  -2.441  1.00 61.10           C  
ANISOU  480  CA  LEU A 104     6339   9880   6997    751  -1103   -150       C  
ATOM    481  C   LEU A 104     -30.585 -12.046  -3.236  1.00 67.94           C  
ANISOU  481  C   LEU A 104     7303  10808   7704    547  -1061   -177       C  
ATOM    482  O   LEU A 104     -30.643 -13.194  -2.791  1.00 70.30           O  
ANISOU  482  O   LEU A 104     7551  11164   7995    507   -948   -246       O  
ATOM    483  CB  LEU A 104     -30.157 -10.584  -1.275  1.00 60.21           C  
ANISOU  483  CB  LEU A 104     6279   9702   6897    845   -945   -244       C  
ATOM    484  CG  LEU A 104     -30.434  -9.301  -0.503  1.00 60.32           C  
ANISOU  484  CG  LEU A 104     6250   9625   7044   1027   -956   -252       C  
ATOM    485  CD1 LEU A 104     -29.292  -9.007   0.502  1.00 54.65           C  
ANISOU  485  CD1 LEU A 104     5632   8845   6288   1062   -820   -340       C  
ATOM    486  CD2 LEU A 104     -30.674  -8.152  -1.497  1.00 50.63           C  
ANISOU  486  CD2 LEU A 104     5077   8304   5858   1045  -1151   -136       C  
ATOM    487  N   ASP A 105     -30.069 -11.744  -4.423  1.00 67.31           N  
ANISOU  487  N   ASP A 105     7373  10705   7497    406  -1149   -126       N  
ATOM    488  CA  ASP A 105     -29.468 -12.738  -5.291  1.00 65.41           C  
ANISOU  488  CA  ASP A 105     7247  10508   7097    197  -1085   -180       C  
ATOM    489  C   ASP A 105     -28.254 -12.133  -6.001  1.00 66.42           C  
ANISOU  489  C   ASP A 105     7562  10577   7099     92  -1067   -186       C  
ATOM    490  O   ASP A 105     -28.408 -11.375  -6.965  1.00 64.62           O  
ANISOU  490  O   ASP A 105     7430  10339   6782     -6  -1221    -83       O  
ATOM    491  CB  ASP A 105     -30.513 -13.226  -6.296  1.00 76.22           C  
ANISOU  491  CB  ASP A 105     8593  11969   8399     47  -1229   -110       C  
ATOM    492  CG  ASP A 105     -29.968 -14.236  -7.271  1.00 85.00           C  
ANISOU  492  CG  ASP A 105     9845  13122   9331   -195  -1154   -188       C  
ATOM    493  OD1 ASP A 105     -29.163 -15.095  -6.859  1.00 85.84           O  
ANISOU  493  OD1 ASP A 105     9974  13202   9441   -204   -959   -320       O  
ATOM    494  OD2 ASP A 105     -30.350 -14.161  -8.460  1.00 95.34           O  
ANISOU  494  OD2 ASP A 105    11242  14482  10499   -383  -1295   -116       O  
ATOM    495  N   HIS A 106     -27.047 -12.468  -5.547  1.00 60.21           N  
ANISOU  495  N   HIS A 106     6821   9752   6306     97   -890   -297       N  
ATOM    496  CA  HIS A 106     -25.860 -11.792  -6.061  1.00 60.46           C  
ANISOU  496  CA  HIS A 106     6997   9733   6244     10   -854   -311       C  
ATOM    497  C   HIS A 106     -24.577 -12.565  -5.747  1.00 64.04           C  
ANISOU  497  C   HIS A 106     7459  10169   6706    -20   -646   -452       C  
ATOM    498  O   HIS A 106     -24.458 -13.188  -4.692  1.00 64.24           O  
ANISOU  498  O   HIS A 106     7379  10179   6850    102   -557   -508       O  
ATOM    499  CB  HIS A 106     -25.775 -10.375  -5.487  1.00 58.70           C  
ANISOU  499  CB  HIS A 106     6784   9423   6096    153   -939   -234       C  
ATOM    500  CG  HIS A 106     -24.781  -9.497  -6.182  1.00 58.21           C  
ANISOU  500  CG  HIS A 106     6884   9310   5921     33   -951   -208       C  
ATOM    501  ND1 HIS A 106     -23.422  -9.554  -5.928  1.00 52.99           N  
ANISOU  501  ND1 HIS A 106     6265   8628   5242     -5   -794   -305       N  
ATOM    502  CD2 HIS A 106     -24.946  -8.523  -7.109  1.00 54.45           C  
ANISOU  502  CD2 HIS A 106     6537   8801   5350    -71  -1111    -85       C  
ATOM    503  CE1 HIS A 106     -22.803  -8.653  -6.661  1.00 61.51           C  
ANISOU  503  CE1 HIS A 106     7488   9672   6211   -134   -837   -256       C  
ATOM    504  NE2 HIS A 106     -23.704  -8.019  -7.399  1.00 62.31           N  
ANISOU  504  NE2 HIS A 106     7660   9761   6253   -183  -1032   -117       N  
ATOM    505  N   CYS A 107     -23.618 -12.503  -6.666  1.00 64.89           N  
ANISOU  505  N   CYS A 107     7686  10277   6692   -190   -572   -505       N  
ATOM    506  CA  CYS A 107     -22.411 -13.327  -6.588  1.00 63.43           C  
ANISOU  506  CA  CYS A 107     7486  10077   6539   -234   -368   -653       C  
ATOM    507  C   CYS A 107     -21.478 -12.865  -5.468  1.00 58.10           C  
ANISOU  507  C   CYS A 107     6744   9339   5991    -86   -312   -668       C  
ATOM    508  O   CYS A 107     -20.657 -13.633  -4.996  1.00 63.63           O  
ANISOU  508  O   CYS A 107     7369  10015   6795    -52   -179   -763       O  
ATOM    509  CB  CYS A 107     -21.681 -13.350  -7.946  1.00 61.72           C  
ANISOU  509  CB  CYS A 107     7406   9893   6152   -480   -279   -727       C  
ATOM    510  SG  CYS A 107     -21.218 -11.730  -8.675  1.00100.35           S  
ANISOU  510  SG  CYS A 107    12463  14782  10885   -609   -379   -620       S  
ATOM    511  N   ASN A 108     -21.640 -11.623  -5.022  1.00 56.96           N  
ANISOU  511  N   ASN A 108     6627   9162   5854      0   -427   -569       N  
ATOM    512  CA  ASN A 108     -20.895 -11.092  -3.880  1.00 51.56           C  
ANISOU  512  CA  ASN A 108     5895   8424   5272    126   -399   -575       C  
ATOM    513  C   ASN A 108     -21.704 -10.946  -2.580  1.00 54.22           C  
ANISOU  513  C   ASN A 108     6145   8741   5714    316   -463   -531       C  
ATOM    514  O   ASN A 108     -21.385 -10.114  -1.728  1.00 58.49           O  
ANISOU  514  O   ASN A 108     6692   9235   6297    403   -486   -512       O  
ATOM    515  CB  ASN A 108     -20.313  -9.736  -4.247  1.00 54.20           C  
ANISOU  515  CB  ASN A 108     6345   8716   5532     62   -453   -524       C  
ATOM    516  CG  ASN A 108     -19.351  -9.824  -5.404  1.00 56.23           C  
ANISOU  516  CG  ASN A 108     6686   9005   5673   -149   -356   -583       C  
ATOM    517  OD1 ASN A 108     -19.493  -9.118  -6.409  1.00 57.02           O  
ANISOU  517  OD1 ASN A 108     6925   9112   5629   -295   -429   -518       O  
ATOM    518  ND2 ASN A 108     -18.374 -10.715  -5.282  1.00 54.51           N  
ANISOU  518  ND2 ASN A 108     6383   8807   5524   -175   -189   -706       N  
ATOM    519  N   ILE A 109     -22.766 -11.729  -2.445  1.00 56.59           N  
ANISOU  519  N   ILE A 109     6373   9084   6045    358   -483   -522       N  
ATOM    520  CA  ILE A 109     -23.583 -11.744  -1.238  1.00 55.09           C  
ANISOU  520  CA  ILE A 109     6090   8897   5943    508   -509   -500       C  
ATOM    521  C   ILE A 109     -23.803 -13.197  -0.865  1.00 57.29           C  
ANISOU  521  C   ILE A 109     6284   9216   6268    502   -434   -543       C  
ATOM    522  O   ILE A 109     -24.031 -14.030  -1.741  1.00 59.03           O  
ANISOU  522  O   ILE A 109     6512   9465   6452    400   -415   -568       O  
ATOM    523  CB  ILE A 109     -24.922 -11.002  -1.453  1.00 55.25           C  
ANISOU  523  CB  ILE A 109     6092   8927   5972    569   -634   -423       C  
ATOM    524  CG1 ILE A 109     -24.641  -9.510  -1.589  1.00 56.01           C  
ANISOU  524  CG1 ILE A 109     6280   8941   6060    602   -715   -374       C  
ATOM    525  CG2 ILE A 109     -25.912 -11.282  -0.318  1.00 49.06           C  
ANISOU  525  CG2 ILE A 109     5184   8176   5281    697   -619   -430       C  
ATOM    526  CD1 ILE A 109     -25.843  -8.683  -1.694  1.00 57.42           C  
ANISOU  526  CD1 ILE A 109     6425   9090   6302    695   -846   -297       C  
ATOM    527  N   VAL A 110     -23.682 -13.511   0.418  1.00 58.84           N  
ANISOU  527  N   VAL A 110     6420   9405   6533    588   -394   -553       N  
ATOM    528  CA  VAL A 110     -23.768 -14.890   0.870  1.00 58.38           C  
ANISOU  528  CA  VAL A 110     6298   9358   6526    573   -336   -575       C  
ATOM    529  C   VAL A 110     -25.116 -15.470   0.421  1.00 54.20           C  
ANISOU  529  C   VAL A 110     5724   8890   5979    539   -365   -558       C  
ATOM    530  O   VAL A 110     -26.147 -14.784   0.456  1.00 58.20           O  
ANISOU  530  O   VAL A 110     6197   9442   6476    588   -432   -517       O  
ATOM    531  CB  VAL A 110     -23.566 -14.992   2.417  1.00 50.15           C  
ANISOU  531  CB  VAL A 110     5218   8309   5530    649   -320   -556       C  
ATOM    532  CG1 VAL A 110     -24.713 -14.332   3.165  1.00 44.83           C  
ANISOU  532  CG1 VAL A 110     4511   7685   4835    722   -346   -533       C  
ATOM    533  CG2 VAL A 110     -23.429 -16.438   2.839  1.00 56.27           C  
ANISOU  533  CG2 VAL A 110     5948   9065   6365    616   -280   -555       C  
ATOM    534  N   ARG A 111     -25.102 -16.707  -0.065  1.00 54.89           N  
ANISOU  534  N   ARG A 111     5806   8972   6077    452   -319   -594       N  
ATOM    535  CA  ARG A 111     -26.312 -17.287  -0.649  1.00 55.29           C  
ANISOU  535  CA  ARG A 111     5826   9085   6097    381   -355   -582       C  
ATOM    536  C   ARG A 111     -27.151 -18.041   0.380  1.00 57.62           C  
ANISOU  536  C   ARG A 111     6033   9415   6444    412   -341   -556       C  
ATOM    537  O   ARG A 111     -26.676 -18.979   1.030  1.00 55.09           O  
ANISOU  537  O   ARG A 111     5711   9043   6178    404   -282   -570       O  
ATOM    538  CB  ARG A 111     -25.979 -18.240  -1.801  1.00 52.07           C  
ANISOU  538  CB  ARG A 111     5480   8651   5654    236   -305   -653       C  
ATOM    539  CG  ARG A 111     -27.222 -19.007  -2.304  1.00 55.99           C  
ANISOU  539  CG  ARG A 111     5950   9212   6113    136   -347   -642       C  
ATOM    540  CD  ARG A 111     -27.008 -19.696  -3.663  1.00 73.38           C  
ANISOU  540  CD  ARG A 111     8248  11400   8233    -43   -308   -725       C  
ATOM    541  NE  ARG A 111     -28.197 -20.424  -4.128  1.00 83.06           N  
ANISOU  541  NE  ARG A 111     9455  12692   9412   -164   -364   -713       N  
ATOM    542  N   LEU A 112     -28.403 -17.629   0.502  1.00 56.49           N  
ANISOU  542  N   LEU A 112     5812   9358   6295    438   -400   -513       N  
ATOM    543  CA  LEU A 112     -29.376 -18.340   1.311  1.00 61.87           C  
ANISOU  543  CA  LEU A 112     6399  10101   7008    430   -376   -495       C  
ATOM    544  C   LEU A 112     -29.939 -19.536   0.553  1.00 67.26           C  
ANISOU  544  C   LEU A 112     7077  10805   7674    288   -383   -506       C  
ATOM    545  O   LEU A 112     -30.860 -19.384  -0.236  1.00 74.42           O  
ANISOU  545  O   LEU A 112     7936  11786   8554    232   -460   -484       O  
ATOM    546  CB  LEU A 112     -30.509 -17.397   1.704  1.00 61.35           C  
ANISOU  546  CB  LEU A 112     6218  10122   6970    517   -417   -465       C  
ATOM    547  CG  LEU A 112     -31.667 -17.948   2.536  1.00 61.48           C  
ANISOU  547  CG  LEU A 112     6106  10234   7020    500   -373   -458       C  
ATOM    548  CD1 LEU A 112     -31.250 -18.195   3.984  1.00 52.09           C  
ANISOU  548  CD1 LEU A 112     4939   9032   5819    523   -273   -471       C  
ATOM    549  CD2 LEU A 112     -32.863 -17.013   2.435  1.00 58.47           C  
ANISOU  549  CD2 LEU A 112     5577   9935   6705    581   -426   -443       C  
ATOM    550  N   ARG A 113     -29.400 -20.722   0.797  1.00 65.13           N  
ANISOU  550  N   ARG A 113     6856  10461   7430    225   -317   -534       N  
ATOM    551  CA  ARG A 113     -29.905 -21.931   0.154  1.00 61.15           C  
ANISOU  551  CA  ARG A 113     6367   9952   6917     79   -310   -559       C  
ATOM    552  C   ARG A 113     -31.284 -22.347   0.683  1.00 61.41           C  
ANISOU  552  C   ARG A 113     6290  10091   6954     28   -331   -511       C  
ATOM    553  O   ARG A 113     -32.207 -22.583  -0.100  1.00 65.62           O  
ANISOU  553  O   ARG A 113     6782  10700   7452    -77   -388   -508       O  
ATOM    554  CB  ARG A 113     -28.892 -23.061   0.324  1.00 68.70           C  
ANISOU  554  CB  ARG A 113     7403  10759   7940     46   -232   -606       C  
ATOM    555  CG  ARG A 113     -28.180 -23.405  -0.963  1.00 81.68           C  
ANISOU  555  CG  ARG A 113     9140  12324   9570    -37   -191   -705       C  
ATOM    556  CD  ARG A 113     -27.238 -24.570  -0.774  1.00 91.42           C  
ANISOU  556  CD  ARG A 113    10424  13388  10925    -47   -105   -765       C  
ATOM    557  NE  ARG A 113     -27.373 -25.606  -1.789  1.00 92.36           N  
ANISOU  557  NE  ARG A 113    10615  13439  11040   -197    -50   -868       N  
ATOM    558  CZ  ARG A 113     -26.508 -26.602  -1.938  1.00 94.99           C  
ANISOU  558  CZ  ARG A 113    10995  13594  11500   -210     45   -959       C  
ATOM    559  NH1 ARG A 113     -25.416 -26.646  -1.189  1.00 92.63           N  
ANISOU  559  NH1 ARG A 113    10664  13181  11352    -76     73   -941       N  
ATOM    560  NH2 ARG A 113     -26.705 -27.527  -2.866  1.00100.45           N  
ANISOU  560  NH2 ARG A 113    11766  14219  12182   -358    109  -1075       N  
ATOM    561  N   TYR A 114     -31.430 -22.431   2.005  1.00 58.83           N  
ANISOU  561  N   TYR A 114     5913   9781   6657     81   -287   -473       N  
ATOM    562  CA  TYR A 114     -32.721 -22.750   2.622  1.00 58.15           C  
ANISOU  562  CA  TYR A 114     5710   9815   6571     23   -277   -437       C  
ATOM    563  C   TYR A 114     -32.946 -22.004   3.928  1.00 58.51           C  
ANISOU  563  C   TYR A 114     5684   9929   6617    122   -225   -418       C  
ATOM    564  O   TYR A 114     -32.067 -21.325   4.455  1.00 56.44           O  
ANISOU  564  O   TYR A 114     5482   9613   6351    225   -207   -423       O  
ATOM    565  CB  TYR A 114     -32.862 -24.236   2.949  1.00 62.13           C  
ANISOU  565  CB  TYR A 114     6258  10265   7082   -121   -241   -422       C  
ATOM    566  CG  TYR A 114     -32.477 -25.195   1.874  1.00 65.01           C  
ANISOU  566  CG  TYR A 114     6725  10518   7456   -230   -255   -468       C  
ATOM    567  CD1 TYR A 114     -33.399 -25.606   0.914  1.00 66.08           C  
ANISOU  567  CD1 TYR A 114     6829  10722   7556   -370   -300   -489       C  
ATOM    568  CD2 TYR A 114     -31.196 -25.736   1.841  1.00 57.96           C  
ANISOU  568  CD2 TYR A 114     5955   9448   6620   -205   -218   -500       C  
ATOM    569  CE1 TYR A 114     -33.036 -26.509  -0.078  1.00 66.40           C  
ANISOU  569  CE1 TYR A 114     6988  10654   7588   -495   -293   -557       C  
ATOM    570  CE2 TYR A 114     -30.832 -26.635   0.860  1.00 62.00           C  
ANISOU  570  CE2 TYR A 114     6559   9841   7158   -304   -198   -576       C  
ATOM    571  CZ  TYR A 114     -31.750 -27.013  -0.094  1.00 71.24           C  
ANISOU  571  CZ  TYR A 114     7725  11080   8265   -456   -227   -612       C  
ATOM    572  OH  TYR A 114     -31.366 -27.905  -1.063  1.00 85.82           O  
ANISOU  572  OH  TYR A 114     9685  12802  10121   -573   -187   -713       O  
ATOM    573  N   PHE A 115     -34.150 -22.168   4.449  1.00 58.07           N  
ANISOU  573  N   PHE A 115     5500  10001   6565     68   -192   -405       N  
ATOM    574  CA  PHE A 115     -34.461 -21.812   5.812  1.00 54.53           C  
ANISOU  574  CA  PHE A 115     4996   9626   6095    100    -99   -407       C  
ATOM    575  C   PHE A 115     -35.547 -22.759   6.287  1.00 59.87           C  
ANISOU  575  C   PHE A 115     5584  10407   6755    -57    -44   -385       C  
ATOM    576  O   PHE A 115     -36.289 -23.316   5.473  1.00 54.80           O  
ANISOU  576  O   PHE A 115     4870   9809   6140   -151    -94   -376       O  
ATOM    577  CB  PHE A 115     -34.894 -20.352   5.933  1.00 52.53           C  
ANISOU  577  CB  PHE A 115     4627   9446   5886    253    -84   -453       C  
ATOM    578  CG  PHE A 115     -36.206 -20.046   5.264  1.00 58.82           C  
ANISOU  578  CG  PHE A 115     5226  10358   6766    262   -126   -460       C  
ATOM    579  CD1 PHE A 115     -36.252 -19.683   3.920  1.00 56.81           C  
ANISOU  579  CD1 PHE A 115     4958  10075   6552    293   -264   -436       C  
ATOM    580  CD2 PHE A 115     -37.394 -20.106   5.976  1.00 63.03           C  
ANISOU  580  CD2 PHE A 115     5577  11034   7336    225    -34   -487       C  
ATOM    581  CE1 PHE A 115     -37.461 -19.385   3.305  1.00 59.67           C  
ANISOU  581  CE1 PHE A 115     5127  10543   7003    296   -341   -417       C  
ATOM    582  CE2 PHE A 115     -38.617 -19.817   5.360  1.00 56.74           C  
ANISOU  582  CE2 PHE A 115     4559  10348   6653    241    -89   -486       C  
ATOM    583  CZ  PHE A 115     -38.649 -19.454   4.028  1.00 51.57           C  
ANISOU  583  CZ  PHE A 115     3890   9656   6050    281   -258   -441       C  
ATOM    584  N   PHE A 116     -35.594 -22.976   7.599  1.00 60.11           N  
ANISOU  584  N   PHE A 116     5638  10479   6723   -114     52   -371       N  
ATOM    585  CA  PHE A 116     -36.589 -23.842   8.217  1.00 58.67           C  
ANISOU  585  CA  PHE A 116     5385  10406   6502   -290    125   -347       C  
ATOM    586  C   PHE A 116     -36.779 -23.468   9.685  1.00 56.69           C  
ANISOU  586  C   PHE A 116     5126  10252   6163   -320    260   -367       C  
ATOM    587  O   PHE A 116     -35.971 -22.733  10.249  1.00 60.57           O  
ANISOU  587  O   PHE A 116     5709  10695   6612   -222    277   -386       O  
ATOM    588  CB  PHE A 116     -36.192 -25.320   8.085  1.00 55.16           C  
ANISOU  588  CB  PHE A 116     5085   9841   6033   -453     73   -269       C  
ATOM    589  CG  PHE A 116     -34.885 -25.664   8.751  1.00 58.19           C  
ANISOU  589  CG  PHE A 116     5665  10065   6379   -443     46   -207       C  
ATOM    590  CD1 PHE A 116     -33.688 -25.562   8.051  1.00 53.28           C  
ANISOU  590  CD1 PHE A 116     5145   9279   5821   -329    -35   -212       C  
ATOM    591  CD2 PHE A 116     -34.856 -26.105  10.073  1.00 57.68           C  
ANISOU  591  CD2 PHE A 116     5676  10022   6217   -565     96   -138       C  
ATOM    592  CE1 PHE A 116     -32.472 -25.881   8.674  1.00 64.31           C  
ANISOU  592  CE1 PHE A 116     6687  10530   7220   -311    -76   -147       C  
ATOM    593  CE2 PHE A 116     -33.647 -26.427  10.698  1.00 56.34           C  
ANISOU  593  CE2 PHE A 116     5678   9703   6025   -563     33    -53       C  
ATOM    594  CZ  PHE A 116     -32.454 -26.312  10.012  1.00 56.84           C  
ANISOU  594  CZ  PHE A 116     5812   9599   6187   -424    -58    -56       C  
ATOM    595  N   TYR A 117     -37.833 -23.989  10.303  1.00 57.68           N  
ANISOU  595  N   TYR A 117     5152  10519   6246   -480    362   -368       N  
ATOM    596  CA  TYR A 117     -38.079 -23.724  11.720  1.00 62.12           C  
ANISOU  596  CA  TYR A 117     5720  11192   6689   -559    517   -400       C  
ATOM    597  C   TYR A 117     -37.849 -24.969  12.572  1.00 59.62           C  
ANISOU  597  C   TYR A 117     5574  10845   6232   -798    523   -287       C  
ATOM    598  O   TYR A 117     -37.977 -26.098  12.096  1.00 61.99           O  
ANISOU  598  O   TYR A 117     5915  11082   6557   -924    444   -204       O  
ATOM    599  CB  TYR A 117     -39.495 -23.187  11.906  1.00 66.79           C  
ANISOU  599  CB  TYR A 117     6047  11990   7340   -562    667   -509       C  
ATOM    600  CG  TYR A 117     -39.699 -21.897  11.162  1.00 68.19           C  
ANISOU  600  CG  TYR A 117     6061  12168   7679   -314    640   -602       C  
ATOM    601  CD1 TYR A 117     -40.060 -21.894   9.823  1.00 60.53           C  
ANISOU  601  CD1 TYR A 117     4972  11175   6850   -238    499   -576       C  
ATOM    602  CD2 TYR A 117     -39.514 -20.679  11.796  1.00 70.00           C  
ANISOU  602  CD2 TYR A 117     6275  12409   7912   -170    745   -709       C  
ATOM    603  CE1 TYR A 117     -40.229 -20.708   9.139  1.00 63.17           C  
ANISOU  603  CE1 TYR A 117     5174  11495   7332    -23    443   -630       C  
ATOM    604  CE2 TYR A 117     -39.686 -19.491  11.121  1.00 71.74           C  
ANISOU  604  CE2 TYR A 117     6360  12598   8300     60    705   -780       C  
ATOM    605  CZ  TYR A 117     -40.039 -19.509   9.793  1.00 69.59           C  
ANISOU  605  CZ  TYR A 117     5970  12299   8172    135    544   -728       C  
ATOM    606  OH  TYR A 117     -40.200 -18.316   9.129  1.00 71.96           O  
ANISOU  606  OH  TYR A 117     6151  12555   8638    352    477   -770       O  
ATOM    607  N   SER A 118     -37.461 -24.757  13.825  1.00 62.61           N  
ANISOU  607  N   SER A 118     6074  11255   6460   -873    600   -277       N  
ATOM    608  CA  SER A 118     -37.204 -25.863  14.741  1.00 68.38           C  
ANISOU  608  CA  SER A 118     6988  11953   7039  -1117    582   -141       C  
ATOM    609  C   SER A 118     -37.264 -25.423  16.190  1.00 81.43           C  
ANISOU  609  C   SER A 118     8716  13735   8487  -1247    723   -169       C  
ATOM    610  O   SER A 118     -37.500 -24.248  16.485  1.00 76.15           O  
ANISOU  610  O   SER A 118     7955  13173   7807  -1136    856   -318       O  
ATOM    611  CB  SER A 118     -35.844 -26.504  14.458  1.00 65.12           C  
ANISOU  611  CB  SER A 118     6780  11297   6666  -1077    381     -3       C  
ATOM    612  OG  SER A 118     -34.786 -25.609  14.731  1.00 71.66           O  
ANISOU  612  OG  SER A 118     7693  12060   7475   -926    337    -21       O  
ATOM    613  N   SER A 119     -37.074 -26.395  17.080  1.00 93.83           N  
ANISOU  613  N   SER A 119    10468  15287   9895  -1499    692    -25       N  
ATOM    614  CA  SER A 119     -36.957 -26.146  18.507  1.00103.53           C  
ANISOU  614  CA  SER A 119    11836  16623  10877  -1683    792    -15       C  
ATOM    615  C   SER A 119     -35.465 -26.219  18.845  1.00121.02           C  
ANISOU  615  C   SER A 119    14288  18651  13044  -1648    587    130       C  
ATOM    616  O   SER A 119     -34.624 -25.815  18.035  1.00122.13           O  
ANISOU  616  O   SER A 119    14413  18642  13349  -1405    460    121       O  
ATOM    617  CB  SER A 119     -37.753 -27.163  19.319  1.00 98.13           C  
ANISOU  617  CB  SER A 119    11210  16055  10018  -2027    877     73       C  
ATOM    618  N   GLY A 120     -35.132 -26.746  20.021  1.00130.93           N  
ANISOU  618  N   GLY A 120    15754  19918  14078  -1903    545    273       N  
ATOM    619  CA  GLY A 120     -33.754 -26.762  20.491  1.00134.32           C  
ANISOU  619  CA  GLY A 120    16391  20193  14454  -1893    338    423       C  
ATOM    620  C   GLY A 120     -33.496 -25.515  21.311  1.00137.59           C  
ANISOU  620  C   GLY A 120    16855  20733  14689  -1889    447    299       C  
ATOM    621  O   GLY A 120     -33.444 -24.417  20.758  1.00139.10           O  
ANISOU  621  O   GLY A 120    16917  20940  14993  -1647    524    121       O  
ATOM    622  N   GLU A 121     -33.306 -25.705  22.618  1.00137.45           N  
ANISOU  622  N   GLU A 121    17045  20793  14387  -2172    439    400       N  
ATOM    623  CA  GLU A 121     -33.181 -24.631  23.615  1.00137.27           C  
ANISOU  623  CA  GLU A 121    17115  20918  14122  -2261    572    273       C  
ATOM    624  C   GLU A 121     -34.550 -23.957  23.811  1.00136.31           C  
ANISOU  624  C   GLU A 121    16827  21032  13930  -2301    927      5       C  
ATOM    625  O   GLU A 121     -35.468 -24.147  23.004  1.00143.48           O  
ANISOU  625  O   GLU A 121    17513  21975  15026  -2193   1034    -82       O  
ATOM    626  CB  GLU A 121     -32.108 -23.603  23.225  1.00130.78           C  
ANISOU  626  CB  GLU A 121    16290  19984  13415  -1997    465    211       C  
ATOM    627  N   LYS A 122     -34.695 -23.210  24.904  1.00124.34           N  
ANISOU  627  N   LYS A 122    15417  19678  12148  -2473   1109   -126       N  
ATOM    628  CA  LYS A 122     -35.939 -22.503  25.230  1.00118.76           C  
ANISOU  628  CA  LYS A 122    14550  19193  11381  -2517   1478   -410       C  
ATOM    629  C   LYS A 122     -37.162 -23.422  25.426  1.00126.00           C  
ANISOU  629  C   LYS A 122    15374  20266  12235  -2755   1642   -397       C  
ATOM    630  O   LYS A 122     -37.779 -23.395  26.496  1.00132.64           O  
ANISOU  630  O   LYS A 122    16290  21311  12797  -3059   1876   -487       O  
ATOM    631  CB  LYS A 122     -36.254 -21.452  24.165  1.00110.34           C  
ANISOU  631  CB  LYS A 122    13212  18082  10631  -2127   1575   -633       C  
ATOM    632  N   LYS A 123     -37.514 -24.207  24.403  1.00121.29           N  
ANISOU  632  N   LYS A 123    14618  19582  11883  -2639   1534   -299       N  
ATOM    633  CA  LYS A 123     -38.725 -25.054  24.403  1.00119.64           C  
ANISOU  633  CA  LYS A 123    14280  19514  11664  -2840   1680   -295       C  
ATOM    634  C   LYS A 123     -40.015 -24.226  24.447  1.00120.53           C  
ANISOU  634  C   LYS A 123    14105  19853  11838  -2793   2044   -603       C  
ATOM    635  O   LYS A 123     -40.177 -23.357  25.309  1.00114.90           O  
ANISOU  635  O   LYS A 123    13424  19278  10955  -2868   2280   -798       O  
ATOM    636  CB  LYS A 123     -38.710 -26.056  25.564  1.00116.15           C  
ANISOU  636  CB  LYS A 123    14105  19144  10881  -3285   1656   -101       C  
ATOM    637  N   ASP A 124     -40.917 -24.533  23.507  1.00123.08           N  
ANISOU  637  N   ASP A 124    14147  20204  12414  -2675   2082   -644       N  
ATOM    638  CA  ASP A 124     -42.123 -23.747  23.182  1.00125.40           C  
ANISOU  638  CA  ASP A 124    14083  20664  12899  -2530   2360   -915       C  
ATOM    639  C   ASP A 124     -41.748 -22.505  22.374  1.00120.67           C  
ANISOU  639  C   ASP A 124    13346  19941  12564  -2113   2311  -1055       C  
ATOM    640  O   ASP A 124     -42.553 -21.991  21.593  1.00114.01           O  
ANISOU  640  O   ASP A 124    12185  19137  11998  -1891   2393  -1196       O  
ATOM    641  CB  ASP A 124     -42.913 -23.354  24.435  1.00126.26           C  
ANISOU  641  CB  ASP A 124    14167  21030  12776  -2791   2734  -1122       C  
ATOM    642  CG  ASP A 124     -43.163 -24.531  25.347  1.00126.93           C  
ANISOU  642  CG  ASP A 124    14448  21238  12542  -3250   2775   -965       C  
ATOM    643  OD1 ASP A 124     -42.212 -24.942  26.042  1.00125.44           O1-
ANISOU  643  OD1 ASP A 124    14613  20967  12082  -3449   2611   -777       O1-
ATOM    644  OD2 ASP A 124     -44.296 -25.058  25.350  1.00128.17           O  
ANISOU  644  OD2 ASP A 124    14430  21492  12777  -3378   2897  -1005       O  
ATOM    645  N   GLU A 125     -40.516 -22.040  22.549  1.00119.51           N  
ANISOU  645  N   GLU A 125    13436  19639  12334  -2018   2155   -999       N  
ATOM    646  CA  GLU A 125     -39.997 -20.985  21.700  1.00118.06           C  
ANISOU  646  CA  GLU A 125    13167  19304  12388  -1646   2057  -1083       C  
ATOM    647  C   GLU A 125     -39.489 -21.615  20.412  1.00111.94           C  
ANISOU  647  C   GLU A 125    12373  18342  11816  -1477   1751   -889       C  
ATOM    648  O   GLU A 125     -38.871 -22.687  20.412  1.00111.09           O  
ANISOU  648  O   GLU A 125    12453  18140  11617  -1620   1555   -669       O  
ATOM    649  CB  GLU A 125     -38.885 -20.200  22.397  1.00115.26           C  
ANISOU  649  CB  GLU A 125    13064  18868  11860  -1632   2022  -1112       C  
ATOM    650  N   VAL A 126     -39.742 -20.919  19.316  1.00103.30           N  
ANISOU  650  N   VAL A 126    11059  17186  11004  -1175   1714   -978       N  
ATOM    651  CA  VAL A 126     -39.463 -21.435  17.992  1.00 92.94           C  
ANISOU  651  CA  VAL A 126     9697  15729   9888  -1027   1469   -838       C  
ATOM    652  C   VAL A 126     -38.253 -20.739  17.383  1.00 84.18           C  
ANISOU  652  C   VAL A 126     8703  14420   8860   -788   1282   -807       C  
ATOM    653  O   VAL A 126     -38.031 -19.547  17.598  1.00 84.51           O  
ANISOU  653  O   VAL A 126     8737  14447   8926   -638   1359   -944       O  
ATOM    654  CB  VAL A 126     -40.697 -21.271  17.081  1.00 88.26           C  
ANISOU  654  CB  VAL A 126     8768  15224   9543   -904   1529   -929       C  
ATOM    655  CG1 VAL A 126     -41.226 -19.851  17.159  1.00 93.81           C  
ANISOU  655  CG1 VAL A 126     9270  15984  10390   -693   1702  -1151       C  
ATOM    656  CG2 VAL A 126     -40.383 -21.678  15.646  1.00 77.76           C  
ANISOU  656  CG2 VAL A 126     7407  13747   8391   -761   1275   -804       C  
ATOM    657  N   TYR A 127     -37.444 -21.505  16.661  1.00 76.09           N  
ANISOU  657  N   TYR A 127     7794  13239   7878   -767   1049   -634       N  
ATOM    658  CA  TYR A 127     -36.249 -20.965  16.047  1.00 70.75           C  
ANISOU  658  CA  TYR A 127     7221  12382   7277   -569    878   -597       C  
ATOM    659  C   TYR A 127     -36.343 -20.921  14.517  1.00 71.48           C  
ANISOU  659  C   TYR A 127     7177  12386   7597   -377    748   -585       C  
ATOM    660  O   TYR A 127     -36.940 -21.789  13.884  1.00 73.99           O  
ANISOU  660  O   TYR A 127     7407  12723   7984   -444    705   -528       O  
ATOM    661  CB  TYR A 127     -35.028 -21.787  16.464  1.00 73.64           C  
ANISOU  661  CB  TYR A 127     7838  12621   7519   -690    713   -419       C  
ATOM    662  CG  TYR A 127     -34.642 -21.590  17.902  1.00 82.67           C  
ANISOU  662  CG  TYR A 127     9160  13828   8423   -864    782   -413       C  
ATOM    663  CD1 TYR A 127     -35.378 -22.171  18.922  1.00 90.75           C  
ANISOU  663  CD1 TYR A 127    10220  15002   9257  -1131    918   -401       C  
ATOM    664  CD2 TYR A 127     -33.554 -20.803  18.247  1.00 85.35           C  
ANISOU  664  CD2 TYR A 127     9637  14088   8704   -788    713   -421       C  
ATOM    665  CE1 TYR A 127     -35.037 -21.985  20.241  1.00 93.85           C  
ANISOU  665  CE1 TYR A 127    10799  15466   9391  -1328    981   -394       C  
ATOM    666  CE2 TYR A 127     -33.198 -20.621  19.568  1.00 88.26           C  
ANISOU  666  CE2 TYR A 127    10185  14523   8826   -977    762   -413       C  
ATOM    667  CZ  TYR A 127     -33.944 -21.215  20.560  1.00 93.74           C  
ANISOU  667  CZ  TYR A 127    10930  15371   9318  -1252    894   -399       C  
ATOM    668  OH  TYR A 127     -33.604 -21.035  21.881  1.00100.89           O  
ANISOU  668  OH  TYR A 127    12038  16356   9940  -1479    942   -388       O  
ATOM    669  N   LEU A 128     -35.737 -19.892  13.942  1.00 64.21           N  
ANISOU  669  N   LEU A 128     6258  11368   6772   -163    684   -637       N  
ATOM    670  CA  LEU A 128     -35.548 -19.783  12.510  1.00 55.50           C  
ANISOU  670  CA  LEU A 128     5089  10162   5836     -6    537   -608       C  
ATOM    671  C   LEU A 128     -34.118 -20.165  12.178  1.00 55.32           C  
ANISOU  671  C   LEU A 128     5258   9970   5790     10    378   -502       C  
ATOM    672  O   LEU A 128     -33.183 -19.654  12.795  1.00 58.51           O  
ANISOU  672  O   LEU A 128     5795  10317   6118     35    364   -502       O  
ATOM    673  CB  LEU A 128     -35.843 -18.358  12.044  1.00 60.25           C  
ANISOU  673  CB  LEU A 128     5563  10760   6569    209    565   -725       C  
ATOM    674  CG  LEU A 128     -35.270 -17.918  10.692  1.00 63.91           C  
ANISOU  674  CG  LEU A 128     6035  11093   7154    369    397   -687       C  
ATOM    675  CD1 LEU A 128     -35.972 -18.586   9.491  1.00 60.83           C  
ANISOU  675  CD1 LEU A 128     5519  10727   6868    347    301   -632       C  
ATOM    676  CD2 LEU A 128     -35.355 -16.406  10.602  1.00 63.00           C  
ANISOU  676  CD2 LEU A 128     5857  10945   7135    560    426   -790       C  
ATOM    677  N   ASN A 129     -33.938 -21.054  11.205  1.00 60.30           N  
ANISOU  677  N   ASN A 129     5897  10520   6494    -10    263   -423       N  
ATOM    678  CA  ASN A 129     -32.596 -21.471  10.799  1.00 56.63           C  
ANISOU  678  CA  ASN A 129     5581   9886   6049     16    133   -345       C  
ATOM    679  C   ASN A 129     -32.323 -21.037   9.372  1.00 61.22           C  
ANISOU  679  C   ASN A 129     6120  10393   6748    152     52   -378       C  
ATOM    680  O   ASN A 129     -33.039 -21.420   8.457  1.00 67.46           O  
ANISOU  680  O   ASN A 129     6822  11211   7600    131     29   -385       O  
ATOM    681  CB  ASN A 129     -32.411 -22.991  10.926  1.00 55.40           C  
ANISOU  681  CB  ASN A 129     5510   9658   5881   -142     78   -233       C  
ATOM    682  CG  ASN A 129     -32.761 -23.512  12.314  1.00 64.86           C  
ANISOU  682  CG  ASN A 129     6769  10935   6938   -322    142   -173       C  
ATOM    683  OD1 ASN A 129     -33.927 -23.490  12.720  1.00 67.51           O  
ANISOU  683  OD1 ASN A 129     7005  11428   7218   -413    262   -220       O  
ATOM    684  ND2 ASN A 129     -31.752 -23.982  13.050  1.00 65.04           N  
ANISOU  684  ND2 ASN A 129     6951  10856   6904   -388     60    -64       N  
ATOM    685  N   LEU A 130     -31.276 -20.246   9.179  1.00 61.64           N  
ANISOU  685  N   LEU A 130     6246  10358   6816    267      4   -393       N  
ATOM    686  CA  LEU A 130     -30.893 -19.815   7.846  1.00 53.80           C  
ANISOU  686  CA  LEU A 130     5242   9294   5904    365    -69   -418       C  
ATOM    687  C   LEU A 130     -29.781 -20.692   7.350  1.00 57.35           C  
ANISOU  687  C   LEU A 130     5793   9608   6391    330   -135   -372       C  
ATOM    688  O   LEU A 130     -28.714 -20.742   7.960  1.00 67.13           O  
ANISOU  688  O   LEU A 130     7118  10768   7620    339   -159   -336       O  
ATOM    689  CB  LEU A 130     -30.462 -18.348   7.842  1.00 53.89           C  
ANISOU  689  CB  LEU A 130     5267   9289   5920    501    -72   -471       C  
ATOM    690  CG  LEU A 130     -31.583 -17.391   8.255  1.00 61.07           C  
ANISOU  690  CG  LEU A 130     6060  10304   6842    567      3   -541       C  
ATOM    691  CD1 LEU A 130     -31.118 -15.953   8.416  1.00 59.82           C  
ANISOU  691  CD1 LEU A 130     5940  10096   6694    695      7   -599       C  
ATOM    692  CD2 LEU A 130     -32.633 -17.472   7.205  1.00 65.05           C  
ANISOU  692  CD2 LEU A 130     6425  10860   7432    582    -37   -541       C  
ATOM    693  N   VAL A 131     -30.032 -21.401   6.254  1.00 49.59           N  
ANISOU  693  N   VAL A 131     4792   8593   5458    283   -164   -379       N  
ATOM    694  CA  VAL A 131     -29.004 -22.256   5.686  1.00 48.57           C  
ANISOU  694  CA  VAL A 131     4746   8317   5390    256   -196   -370       C  
ATOM    695  C   VAL A 131     -28.291 -21.541   4.538  1.00 53.92           C  
ANISOU  695  C   VAL A 131     5447   8947   6093    328   -219   -430       C  
ATOM    696  O   VAL A 131     -28.848 -21.328   3.455  1.00 50.93           O  
ANISOU  696  O   VAL A 131     5042   8612   5699    306   -236   -467       O  
ATOM    697  CB  VAL A 131     -29.578 -23.579   5.193  1.00 50.98           C  
ANISOU  697  CB  VAL A 131     5052   8592   5727    131   -194   -364       C  
ATOM    698  CG1 VAL A 131     -28.495 -24.401   4.516  1.00 54.24           C  
ANISOU  698  CG1 VAL A 131     5545   8830   6234    121   -202   -390       C  
ATOM    699  CG2 VAL A 131     -30.187 -24.338   6.333  1.00 49.55           C  
ANISOU  699  CG2 VAL A 131     4867   8446   5512     33   -174   -291       C  
ATOM    700  N   LEU A 132     -27.044 -21.174   4.798  1.00 60.97           N  
ANISOU  700  N   LEU A 132     6392   9759   7016    393   -227   -428       N  
ATOM    701  CA  LEU A 132     -26.255 -20.386   3.874  1.00 52.16           C  
ANISOU  701  CA  LEU A 132     5302   8606   5908    446   -235   -481       C  
ATOM    702  C   LEU A 132     -25.136 -21.216   3.315  1.00 54.11           C  
ANISOU  702  C   LEU A 132     5586   8724   6249    421   -211   -517       C  
ATOM    703  O   LEU A 132     -24.597 -22.070   4.022  1.00 53.59           O  
ANISOU  703  O   LEU A 132     5525   8570   6269    418   -217   -476       O  
ATOM    704  CB  LEU A 132     -25.684 -19.156   4.569  1.00 42.03           C  
ANISOU  704  CB  LEU A 132     4035   7340   4594    533   -251   -469       C  
ATOM    705  CG  LEU A 132     -26.722 -18.409   5.404  1.00 49.10           C  
ANISOU  705  CG  LEU A 132     4891   8341   5423    567   -243   -455       C  
ATOM    706  CD1 LEU A 132     -26.079 -17.781   6.614  1.00 52.18           C  
ANISOU  706  CD1 LEU A 132     5324   8726   5777    603   -242   -438       C  
ATOM    707  CD2 LEU A 132     -27.459 -17.359   4.568  1.00 49.04           C  
ANISOU  707  CD2 LEU A 132     4847   8387   5400    618   -265   -488       C  
ATOM    708  N   ASP A 133     -24.786 -20.958   2.051  1.00 56.44           N  
ANISOU  708  N   ASP A 133     5907   9002   6535    398   -185   -593       N  
ATOM    709  CA  ASP A 133     -23.602 -21.560   1.440  1.00 57.33           C  
ANISOU  709  CA  ASP A 133     6040   8995   6749    382   -125   -665       C  
ATOM    710  C   ASP A 133     -22.374 -21.189   2.246  1.00 54.46           C  
ANISOU  710  C   ASP A 133     5650   8573   6468    467   -140   -632       C  
ATOM    711  O   ASP A 133     -22.131 -20.016   2.534  1.00 55.25           O  
ANISOU  711  O   ASP A 133     5756   8732   6503    514   -173   -608       O  
ATOM    712  CB  ASP A 133     -23.412 -21.097   0.004  1.00 73.90           C  
ANISOU  712  CB  ASP A 133     8184  11116   8777    316    -80   -758       C  
ATOM    713  CG  ASP A 133     -24.320 -21.819  -0.975  1.00 79.80           C  
ANISOU  713  CG  ASP A 133     8970  11888   9463    191    -61   -809       C  
ATOM    714  OD1 ASP A 133     -24.730 -22.968  -0.694  1.00 78.24           O  
ANISOU  714  OD1 ASP A 133     8763  11636   9330    154    -46   -810       O  
ATOM    715  OD2 ASP A 133     -24.597 -21.229  -2.037  1.00 81.76           O  
ANISOU  715  OD2 ASP A 133     9269  12204   9591    112    -72   -842       O  
ATOM    716  N   TYR A 134     -21.625 -22.202   2.650  1.00 50.29           N  
ANISOU  716  N   TYR A 134     5091   7920   6097    484   -131   -622       N  
ATOM    717  CA  TYR A 134     -20.452 -21.992   3.470  1.00 49.77           C  
ANISOU  717  CA  TYR A 134     4980   7796   6136    555   -177   -569       C  
ATOM    718  C   TYR A 134     -19.278 -21.375   2.711  1.00 58.44           C  
ANISOU  718  C   TYR A 134     6044   8873   7288    576   -117   -657       C  
ATOM    719  O   TYR A 134     -18.942 -21.795   1.605  1.00 61.48           O  
ANISOU  719  O   TYR A 134     6421   9205   7732    538    -12   -776       O  
ATOM    720  CB  TYR A 134     -20.021 -23.318   4.093  1.00 50.54           C  
ANISOU  720  CB  TYR A 134     5039   7745   6418    571   -213   -511       C  
ATOM    721  CG  TYR A 134     -18.854 -23.184   5.025  1.00 55.96           C  
ANISOU  721  CG  TYR A 134     5665   8372   7225    635   -302   -423       C  
ATOM    722  CD1 TYR A 134     -19.047 -22.701   6.318  1.00 53.16           C  
ANISOU  722  CD1 TYR A 134     5344   8092   6763    627   -416   -290       C  
ATOM    723  CD2 TYR A 134     -17.565 -23.564   4.641  1.00 56.32           C  
ANISOU  723  CD2 TYR A 134     5613   8290   7497    691   -274   -475       C  
ATOM    724  CE1 TYR A 134     -17.998 -22.577   7.196  1.00 53.00           C  
ANISOU  724  CE1 TYR A 134     5279   8029   6831    657   -526   -194       C  
ATOM    725  CE2 TYR A 134     -16.503 -23.446   5.525  1.00 50.98           C  
ANISOU  725  CE2 TYR A 134     4857   7565   6947    744   -386   -374       C  
ATOM    726  CZ  TYR A 134     -16.734 -22.953   6.805  1.00 57.03           C  
ANISOU  726  CZ  TYR A 134     5676   8414   7578    719   -527   -223       C  
ATOM    727  OH  TYR A 134     -15.703 -22.814   7.706  1.00 69.25           O  
ANISOU  727  OH  TYR A 134     7159   9928   9225    742   -665   -108       O  
ATOM    728  N   VAL A 135     -18.644 -20.391   3.340  1.00 60.56           N  
ANISOU  728  N   VAL A 135     6297   9184   7528    616   -175   -605       N  
ATOM    729  CA  VAL A 135     -17.447 -19.760   2.817  1.00 53.91           C  
ANISOU  729  CA  VAL A 135     5410   8331   6742    621   -130   -670       C  
ATOM    730  C   VAL A 135     -16.353 -19.905   3.886  1.00 56.79           C  
ANISOU  730  C   VAL A 135     5685   8634   7259    677   -219   -585       C  
ATOM    731  O   VAL A 135     -16.586 -19.613   5.044  1.00 66.06           O  
ANISOU  731  O   VAL A 135     6890   9846   8365    687   -333   -470       O  
ATOM    732  CB  VAL A 135     -17.721 -18.279   2.460  1.00 51.78           C  
ANISOU  732  CB  VAL A 135     5218   8172   6283    591   -135   -682       C  
ATOM    733  CG1 VAL A 135     -16.530 -17.654   1.743  1.00 52.00           C  
ANISOU  733  CG1 VAL A 135     5215   8196   6349    558    -69   -756       C  
ATOM    734  CG2 VAL A 135     -18.981 -18.177   1.565  1.00 43.93           C  
ANISOU  734  CG2 VAL A 135     4306   7239   5146    538   -102   -719       C  
ATOM    735  N   PRO A 136     -15.158 -20.378   3.498  1.00 55.10           N  
ANISOU  735  N   PRO A 136     5352   8327   7257    704   -167   -644       N  
ATOM    736  CA  PRO A 136     -14.174 -20.827   4.497  1.00 53.80           C  
ANISOU  736  CA  PRO A 136     5070   8077   7294    763   -282   -541       C  
ATOM    737  C   PRO A 136     -13.400 -19.744   5.254  1.00 52.82           C  
ANISOU  737  C   PRO A 136     4919   8026   7122    754   -388   -464       C  
ATOM    738  O   PRO A 136     -12.849 -20.054   6.301  1.00 56.27           O  
ANISOU  738  O   PRO A 136     5293   8419   7667    779   -535   -335       O  
ATOM    739  CB  PRO A 136     -13.205 -21.677   3.670  1.00 51.80           C  
ANISOU  739  CB  PRO A 136     4670   7694   7319    805   -166   -660       C  
ATOM    740  CG  PRO A 136     -13.357 -21.198   2.261  1.00 51.78           C  
ANISOU  740  CG  PRO A 136     4718   7757   7198    733     22   -838       C  
ATOM    741  CD  PRO A 136     -14.768 -20.736   2.116  1.00 47.21           C  
ANISOU  741  CD  PRO A 136     4315   7285   6339    672      5   -813       C  
ATOM    742  N   GLU A 137     -13.313 -18.531   4.728  1.00 50.99           N  
ANISOU  742  N   GLU A 137     4741   7895   6739    706   -329   -531       N  
ATOM    743  CA  GLU A 137     -12.482 -17.502   5.345  1.00 47.18           C  
ANISOU  743  CA  GLU A 137     4236   7468   6222    679   -417   -477       C  
ATOM    744  C   GLU A 137     -13.162 -16.152   5.452  1.00 46.15           C  
ANISOU  744  C   GLU A 137     4265   7441   5827    627   -428   -477       C  
ATOM    745  O   GLU A 137     -14.273 -15.956   4.973  1.00 44.23           O  
ANISOU  745  O   GLU A 137     4132   7233   5441    622   -370   -517       O  
ATOM    746  CB  GLU A 137     -11.159 -17.338   4.577  1.00 53.50           C  
ANISOU  746  CB  GLU A 137     4886   8248   7191    666   -330   -569       C  
ATOM    747  CG  GLU A 137     -10.113 -18.426   4.844  1.00 68.20           C  
ANISOU  747  CG  GLU A 137     6535   9997   9382    738   -366   -545       C  
ATOM    748  CD  GLU A 137      -9.597 -18.419   6.295  1.00 85.01           C  
ANISOU  748  CD  GLU A 137     8609  12116  11573    751   -598   -360       C  
ATOM    749  OE1 GLU A 137      -9.868 -17.440   7.033  1.00 87.13           O  
ANISOU  749  OE1 GLU A 137     9005  12483  11619    684   -699   -285       O  
ATOM    750  OE2 GLU A 137      -8.913 -19.390   6.699  1.00 90.45           O  
ANISOU  750  OE2 GLU A 137     9134  12694  12540    820   -685   -290       O  
ATOM    751  N   THR A 138     -12.483 -15.210   6.097  1.00 52.04           N  
ANISOU  751  N   THR A 138     5019   8228   6524    587   -513   -431       N  
ATOM    752  CA  THR A 138     -12.982 -13.839   6.192  1.00 51.10           C  
ANISOU  752  CA  THR A 138     5052   8175   6188    541   -519   -446       C  
ATOM    753  C   THR A 138     -11.875 -12.835   5.954  1.00 47.99           C  
ANISOU  753  C   THR A 138     4634   7801   5799    470   -521   -473       C  
ATOM    754  O   THR A 138     -10.692 -13.159   6.086  1.00 47.82           O  
ANISOU  754  O   THR A 138     4462   7764   5942    455   -554   -455       O  
ATOM    755  CB  THR A 138     -13.601 -13.549   7.580  1.00 47.19           C  
ANISOU  755  CB  THR A 138     4659   7713   5557    533   -629   -361       C  
ATOM    756  OG1 THR A 138     -12.558 -13.541   8.564  1.00 59.73           O  
ANISOU  756  OG1 THR A 138     6189   9303   7203    486   -759   -275       O  
ATOM    757  CG2 THR A 138     -14.627 -14.608   7.943  1.00 41.15           C  
ANISOU  757  CG2 THR A 138     3907   6938   4789    576   -630   -321       C  
ATOM    758  N   VAL A 139     -12.249 -11.601   5.650  1.00 46.69           N  
ANISOU  758  N   VAL A 139     4609   7664   5469    425   -499   -509       N  
ATOM    759  CA  VAL A 139     -11.252 -10.551   5.488  1.00 48.11           C  
ANISOU  759  CA  VAL A 139     4794   7857   5629    333   -509   -527       C  
ATOM    760  C   VAL A 139     -10.529 -10.347   6.803  1.00 52.82           C  
ANISOU  760  C   VAL A 139     5358   8468   6241    295   -649   -448       C  
ATOM    761  O   VAL A 139      -9.324 -10.132   6.827  1.00 63.18           O  
ANISOU  761  O   VAL A 139     6563   9795   7646    226   -682   -439       O  
ATOM    762  CB  VAL A 139     -11.895  -9.229   5.011  1.00 56.70           C  
ANISOU  762  CB  VAL A 139     6067   8938   6538    294   -485   -560       C  
ATOM    763  CG1 VAL A 139     -10.922  -8.067   5.148  1.00 52.61           C  
ANISOU  763  CG1 VAL A 139     5588   8421   5979    182   -524   -561       C  
ATOM    764  CG2 VAL A 139     -12.350  -9.367   3.562  1.00 61.23           C  
ANISOU  764  CG2 VAL A 139     6665   9508   7092    285   -373   -619       C  
ATOM    765  N   TYR A 140     -11.275 -10.464   7.899  1.00 49.95           N  
ANISOU  765  N   TYR A 140     5083   8112   5784    323   -730   -391       N  
ATOM    766  CA  TYR A 140     -10.750 -10.281   9.228  1.00 42.58           C  
ANISOU  766  CA  TYR A 140     4163   7204   4812    255   -875   -310       C  
ATOM    767  C   TYR A 140      -9.634 -11.277   9.540  1.00 49.02           C  
ANISOU  767  C   TYR A 140     4773   8015   5838    252   -975   -222       C  
ATOM    768  O   TYR A 140      -8.540 -10.891   9.987  1.00 49.26           O  
ANISOU  768  O   TYR A 140     4733   8069   5916    166  -1080   -175       O  
ATOM    769  CB  TYR A 140     -11.866 -10.413  10.268  1.00 55.57           C  
ANISOU  769  CB  TYR A 140     5942   8867   6305    269   -910   -278       C  
ATOM    770  CG  TYR A 140     -11.367 -10.254  11.681  1.00 51.28           C  
ANISOU  770  CG  TYR A 140     5445   8362   5677    161  -1063   -193       C  
ATOM    771  CD1 TYR A 140     -11.250  -8.989  12.245  1.00 50.38           C  
ANISOU  771  CD1 TYR A 140     5481   8265   5396     59  -1088   -236       C  
ATOM    772  CD2 TYR A 140     -10.985 -11.354  12.434  1.00 55.43           C  
ANISOU  772  CD2 TYR A 140     5877   8896   6287    143  -1193    -64       C  
ATOM    773  CE1 TYR A 140     -10.773  -8.821  13.521  1.00 62.26           C  
ANISOU  773  CE1 TYR A 140     7048   9815   6794    -75  -1231   -166       C  
ATOM    774  CE2 TYR A 140     -10.500 -11.200  13.727  1.00 65.59           C  
ANISOU  774  CE2 TYR A 140     7221  10228   7473     10  -1362     34       C  
ATOM    775  CZ  TYR A 140     -10.395  -9.925  14.267  1.00 69.84           C  
ANISOU  775  CZ  TYR A 140     7916  10803   7817   -108  -1375    -23       C  
ATOM    776  OH  TYR A 140      -9.924  -9.743  15.555  1.00 73.56           O  
ANISOU  776  OH  TYR A 140     8468  11329   8152   -274  -1543     65       O  
ATOM    777  N   ARG A 141      -9.906 -12.560   9.322  1.00 46.04           N  
ANISOU  777  N   ARG A 141     4293   7595   5604    344   -953   -196       N  
ATOM    778  CA  ARG A 141      -8.885 -13.574   9.589  1.00 48.12           C  
ANISOU  778  CA  ARG A 141     4345   7818   6119    369  -1054   -108       C  
ATOM    779  C   ARG A 141      -7.692 -13.419   8.662  1.00 52.62           C  
ANISOU  779  C   ARG A 141     4727   8381   6886    363   -980   -181       C  
ATOM    780  O   ARG A 141      -6.554 -13.480   9.116  1.00 57.73           O  
ANISOU  780  O   ARG A 141     5212   9032   7689    326  -1102   -110       O  
ATOM    781  CB  ARG A 141      -9.494 -14.965   9.487  1.00 50.14           C  
ANISOU  781  CB  ARG A 141     4553   8001   6499    470  -1033    -78       C  
ATOM    782  CG  ARG A 141     -10.426 -15.199  10.651  1.00 56.48           C  
ANISOU  782  CG  ARG A 141     5510   8826   7126    438  -1139     26       C  
ATOM    783  CD  ARG A 141     -11.471 -16.288  10.465  1.00 64.64           C  
ANISOU  783  CD  ARG A 141     6572   9807   8180    509  -1077     30       C  
ATOM    784  NE  ARG A 141     -11.023 -17.449   9.713  1.00 76.32           N  
ANISOU  784  NE  ARG A 141     7880  11175   9942    602  -1033     13       N  
ATOM    785  CZ  ARG A 141     -11.430 -18.688   9.968  1.00 80.18           C  
ANISOU  785  CZ  ARG A 141     8350  11577  10538    645  -1076     88       C  
ATOM    786  NH1 ARG A 141     -12.260 -18.920  10.991  1.00 72.36           N  
ANISOU  786  NH1 ARG A 141     7498  10617   9377    585  -1171    199       N  
ATOM    787  NH2 ARG A 141     -10.988 -19.694   9.217  1.00 79.17           N  
ANISOU  787  NH2 ARG A 141     8070  11324  10688    734  -1015     44       N  
ATOM    788  N   VAL A 142      -7.945 -13.183   7.371  1.00 58.83           N  
ANISOU  788  N   VAL A 142     5533   9166   7656    378   -784   -321       N  
ATOM    789  CA  VAL A 142      -6.851 -12.992   6.419  1.00 56.98           C  
ANISOU  789  CA  VAL A 142     5133   8941   7576    341   -674   -414       C  
ATOM    790  C   VAL A 142      -6.008 -11.757   6.756  1.00 55.59           C  
ANISOU  790  C   VAL A 142     4968   8833   7321    210   -748   -393       C  
ATOM    791  O   VAL A 142      -4.788 -11.836   6.774  1.00 57.99           O  
ANISOU  791  O   VAL A 142     5061   9153   7821    174   -780   -382       O  
ATOM    792  CB  VAL A 142      -7.371 -12.866   4.970  1.00 57.17           C  
ANISOU  792  CB  VAL A 142     5229   8967   7527    333   -453   -562       C  
ATOM    793  CG1 VAL A 142      -6.260 -12.343   4.048  1.00 48.29           C  
ANISOU  793  CG1 VAL A 142     3985   7882   6479    234   -327   -663       C  
ATOM    794  CG2 VAL A 142      -7.945 -14.228   4.468  1.00 45.70           C  
ANISOU  794  CG2 VAL A 142     3722   7441   6203    441   -360   -610       C  
ATOM    795  N   ALA A 143      -6.650 -10.624   7.030  1.00 53.99           N  
ANISOU  795  N   ALA A 143     5000   8661   6852    139   -774   -390       N  
ATOM    796  CA  ALA A 143      -5.923  -9.398   7.384  1.00 53.02           C  
ANISOU  796  CA  ALA A 143     4926   8585   6635     -2   -846   -376       C  
ATOM    797  C   ALA A 143      -5.040  -9.556   8.630  1.00 62.20           C  
ANISOU  797  C   ALA A 143     5972   9776   7886    -55  -1057   -253       C  
ATOM    798  O   ALA A 143      -3.954  -8.975   8.726  1.00 68.40           O  
ANISOU  798  O   ALA A 143     6657  10605   8726   -171  -1114   -241       O  
ATOM    799  CB  ALA A 143      -6.891  -8.252   7.578  1.00 48.61           C  
ANISOU  799  CB  ALA A 143     4652   8017   5800    -45   -845   -398       C  
ATOM    800  N   ARG A 144      -5.515 -10.352   9.578  1.00 60.70           N  
ANISOU  800  N   ARG A 144     5798   9566   7701     10  -1182   -152       N  
ATOM    801  CA  ARG A 144      -4.823 -10.535  10.835  1.00 61.86           C  
ANISOU  801  CA  ARG A 144     5873   9741   7891    -61  -1416     -6       C  
ATOM    802  C   ARG A 144      -3.646 -11.486  10.664  1.00 67.65           C  
ANISOU  802  C   ARG A 144     6275  10451   8977     -8  -1484     55       C  
ATOM    803  O   ARG A 144      -2.626 -11.355  11.367  1.00 68.37           O  
ANISOU  803  O   ARG A 144     6232  10582   9165    -98  -1674    161       O  
ATOM    804  CB  ARG A 144      -5.818 -11.018  11.889  1.00 63.82           C  
ANISOU  804  CB  ARG A 144     6285   9977   7985    -40  -1519     85       C  
ATOM    805  CG  ARG A 144      -5.247 -11.468  13.202  1.00 82.14           C  
ANISOU  805  CG  ARG A 144     8553  12322  10336   -121  -1781    265       C  
ATOM    806  CD  ARG A 144      -6.371 -11.991  14.075  1.00 99.44           C  
ANISOU  806  CD  ARG A 144    10929  14507  12346   -117  -1832    335       C  
ATOM    807  NE  ARG A 144      -6.892 -13.281  13.632  1.00114.62           N  
ANISOU  807  NE  ARG A 144    12760  16350  14441     38  -1771    356       N  
ATOM    808  CZ  ARG A 144      -7.789 -13.983  14.319  1.00123.87           C  
ANISOU  808  CZ  ARG A 144    14049  17508  15507     42  -1818    435       C  
ATOM    809  NH1 ARG A 144      -8.254 -13.513  15.473  1.00128.23           N  
ANISOU  809  NH1 ARG A 144    14812  18134  15776   -103  -1911    490       N  
ATOM    810  NH2 ARG A 144      -8.221 -15.151  13.861  1.00125.08           N  
ANISOU  810  NH2 ARG A 144    14120  17576  15828    171  -1762    451       N  
ATOM    811  N   HIS A 145      -3.747 -12.404   9.703  1.00 67.41           N  
ANISOU  811  N   HIS A 145     6102  10355   9156    131  -1327    -22       N  
ATOM    812  CA  HIS A 145      -2.588 -13.225   9.383  1.00 66.37           C  
ANISOU  812  CA  HIS A 145     5632  10184   9403    197  -1342     -9       C  
ATOM    813  C   HIS A 145      -1.462 -12.319   8.909  1.00 67.93           C  
ANISOU  813  C   HIS A 145     5689  10460   9659     79  -1289    -79       C  
ATOM    814  O   HIS A 145      -0.304 -12.457   9.320  1.00 70.41           O  
ANISOU  814  O   HIS A 145     5751  10796  10206     46  -1431      1       O  
ATOM    815  CB  HIS A 145      -2.884 -14.279   8.320  1.00 68.97           C  
ANISOU  815  CB  HIS A 145     5851  10420   9934    349  -1134   -127       C  
ATOM    816  CG  HIS A 145      -1.637 -14.839   7.692  1.00 88.02           C  
ANISOU  816  CG  HIS A 145     7911  12796  12736    405  -1057   -194       C  
ATOM    817  ND1 HIS A 145      -1.022 -15.987   8.143  1.00 94.67           N  
ANISOU  817  ND1 HIS A 145     8495  13534  13943    526  -1192    -94       N  
ATOM    818  CD2 HIS A 145      -0.866 -14.378   6.674  1.00 87.78           C  
ANISOU  818  CD2 HIS A 145     7735  12819  12798    347   -856   -351       C  
ATOM    819  CE1 HIS A 145       0.058 -16.222   7.418  1.00 94.16           C  
ANISOU  819  CE1 HIS A 145     8119  13453  14204    563  -1064   -204       C  
ATOM    820  NE2 HIS A 145       0.174 -15.260   6.521  1.00 89.30           N  
ANISOU  820  NE2 HIS A 145     7567  12945  13417    444   -848   -368       N  
ATOM    821  N   TYR A 146      -1.802 -11.388   8.032  1.00 66.05           N  
ANISOU  821  N   TYR A 146     5610  10266   9218      3  -1095   -219       N  
ATOM    822  CA  TYR A 146      -0.784 -10.510   7.497  1.00 66.85           C  
ANISOU  822  CA  TYR A 146     5603  10444   9354   -136  -1023   -291       C  
ATOM    823  C   TYR A 146      -0.258  -9.590   8.579  1.00 62.06           C  
ANISOU  823  C   TYR A 146     5053   9904   8622   -293  -1250   -174       C  
ATOM    824  O   TYR A 146       0.921  -9.297   8.633  1.00 67.29           O  
ANISOU  824  O   TYR A 146     5502  10627   9438   -394  -1308   -156       O  
ATOM    825  CB  TYR A 146      -1.328  -9.717   6.304  1.00 63.32           C  
ANISOU  825  CB  TYR A 146     5351  10015   8693   -203   -783   -444       C  
ATOM    826  CG  TYR A 146      -1.322 -10.558   5.050  1.00 64.48           C  
ANISOU  826  CG  TYR A 146     5358  10130   9011   -118   -539   -587       C  
ATOM    827  CD1 TYR A 146      -2.409 -11.352   4.714  1.00 60.03           C  
ANISOU  827  CD1 TYR A 146     4905   9495   8408     14   -458   -621       C  
ATOM    828  CD2 TYR A 146      -0.198 -10.607   4.238  1.00 61.92           C  
ANISOU  828  CD2 TYR A 146     4779   9852   8895   -182   -382   -697       C  
ATOM    829  CE1 TYR A 146      -2.391 -12.141   3.588  1.00 60.05           C  
ANISOU  829  CE1 TYR A 146     4798   9465   8554     70   -233   -766       C  
ATOM    830  CE2 TYR A 146      -0.178 -11.384   3.105  1.00 59.66           C  
ANISOU  830  CE2 TYR A 146     4378   9538   8754   -124   -133   -855       C  
ATOM    831  CZ  TYR A 146      -1.267 -12.151   2.791  1.00 57.87           C  
ANISOU  831  CZ  TYR A 146     4288   9232   8470     -1    -64   -889       C  
ATOM    832  OH  TYR A 146      -1.234 -12.934   1.680  1.00 57.21           O  
ANISOU  832  OH  TYR A 146     4106   9116   8517     36    185  -1059       O  
ATOM    833  N   SER A 147      -1.136  -9.159   9.461  1.00 63.48           N  
ANISOU  833  N   SER A 147     5516  10077   8527   -326  -1373   -103       N  
ATOM    834  CA  SER A 147      -0.755  -8.153  10.425  1.00 65.13           C  
ANISOU  834  CA  SER A 147     5843  10344   8559   -506  -1556    -28       C  
ATOM    835  C   SER A 147       0.185  -8.779  11.464  1.00 69.37           C  
ANISOU  835  C   SER A 147     6150  10913   9293   -536  -1825    143       C  
ATOM    836  O   SER A 147       1.197  -8.173  11.830  1.00 63.49           O  
ANISOU  836  O   SER A 147     5302  10240   8583   -696  -1956    191       O  
ATOM    837  CB  SER A 147      -1.998  -7.534  11.061  1.00 64.97           C  
ANISOU  837  CB  SER A 147     6190  10299   8196   -531  -1577    -32       C  
ATOM    838  OG  SER A 147      -1.627  -6.402  11.819  1.00 79.01           O  
ANISOU  838  OG  SER A 147     8115  12122   9784   -727  -1704     -7       O  
ATOM    839  N   ARG A 148      -0.125 -10.004  11.899  1.00 73.94           N  
ANISOU  839  N   ARG A 148     6643  11433  10016   -394  -1920    244       N  
ATOM    840  CA  ARG A 148       0.735 -10.735  12.838  1.00 71.90           C  
ANISOU  840  CA  ARG A 148     6155  11181   9983   -405  -2205    437       C  
ATOM    841  C   ARG A 148       2.067 -11.147  12.201  1.00 79.52           C  
ANISOU  841  C   ARG A 148     6698  12150  11365   -357  -2188    423       C  
ATOM    842  O   ARG A 148       3.026 -11.474  12.901  1.00 91.27           O  
ANISOU  842  O   ARG A 148     7947  13659  13071   -397  -2441    581       O  
ATOM    843  CB  ARG A 148       0.044 -12.000  13.352  1.00 71.92           C  
ANISOU  843  CB  ARG A 148     6176  11093  10059   -260  -2302    555       C  
ATOM    844  CG  ARG A 148      -1.117 -11.826  14.321  1.00 71.12           C  
ANISOU  844  CG  ARG A 148     6429  11003   9589   -330  -2385    619       C  
ATOM    845  CD  ARG A 148      -1.507 -13.215  14.802  1.00 79.79           C  
ANISOU  845  CD  ARG A 148     7474  12010  10830   -208  -2510    765       C  
ATOM    846  NE  ARG A 148      -2.945 -13.459  14.830  1.00 88.25           N  
ANISOU  846  NE  ARG A 148     8813  13051  11669   -152  -2377    712       N  
ATOM    847  CZ  ARG A 148      -3.561 -14.192  15.758  1.00 95.01           C  
ANISOU  847  CZ  ARG A 148     9791  13880  12429   -170  -2527    860       C  
ATOM    848  NH1 ARG A 148      -2.856 -14.762  16.740  1.00102.14           N  
ANISOU  848  NH1 ARG A 148    10590  14774  13445   -243  -2839   1090       N  
ATOM    849  NH2 ARG A 148      -4.879 -14.367  15.695  1.00 85.74           N  
ANISOU  849  NH2 ARG A 148     8836  12690  11052   -125  -2375    789       N  
ATOM    850  N   ALA A 149       2.134 -11.128  10.876  1.00 80.87           N  
ANISOU  850  N   ALA A 149     6770  12305  11651   -282  -1889    232       N  
ATOM    851  CA  ALA A 149       3.376 -11.454  10.182  1.00 76.89           C  
ANISOU  851  CA  ALA A 149     5862  11816  11538   -249  -1809    172       C  
ATOM    852  C   ALA A 149       4.092 -10.150   9.882  1.00 75.10           C  
ANISOU  852  C   ALA A 149     5636  11713  11187   -466  -1752     98       C  
ATOM    853  O   ALA A 149       5.167 -10.137   9.282  1.00 70.49           O  
ANISOU  853  O   ALA A 149     4732  11178  10873   -498  -1660     27       O  
ATOM    854  CB  ALA A 149       3.107 -12.244   8.898  1.00 71.93           C  
ANISOU  854  CB  ALA A 149     5121  11105  11103    -76  -1495    -12       C  
ATOM    855  N   LYS A 150       3.485  -9.050  10.322  1.00 79.02           N  
ANISOU  855  N   LYS A 150     6492  12253  11281   -622  -1802    109       N  
ATOM    856  CA  LYS A 150       4.026  -7.713  10.107  1.00 85.76           C  
ANISOU  856  CA  LYS A 150     7420  13198  11966   -850  -1763     47       C  
ATOM    857  C   LYS A 150       4.203  -7.444   8.612  1.00 91.13           C  
ANISOU  857  C   LYS A 150     8031  13893  12700   -858  -1430   -150       C  
ATOM    858  O   LYS A 150       5.127  -6.740   8.197  1.00 91.22           O  
ANISOU  858  O   LYS A 150     7911  13989  12759  -1027  -1370   -204       O  
ATOM    859  CB  LYS A 150       5.351  -7.537  10.868  1.00 83.66           C  
ANISOU  859  CB  LYS A 150     6881  13023  11882   -996  -2017    177       C  
ATOM    860  N   GLN A 151       3.323  -8.035   7.803  1.00 89.12           N  
ANISOU  860  N   GLN A 151     7868  13563  12431   -698  -1218   -254       N  
ATOM    861  CA  GLN A 151       3.326  -7.796   6.360  1.00 88.21           C  
ANISOU  861  CA  GLN A 151     7750  13463  12301   -731   -900   -440       C  
ATOM    862  C   GLN A 151       2.030  -7.157   5.933  1.00 87.17           C  
ANISOU  862  C   GLN A 151     8029  13284  11809   -744   -794   -494       C  
ATOM    863  O   GLN A 151       1.032  -7.197   6.653  1.00 92.74           O  
ANISOU  863  O   GLN A 151     8967  13930  12339   -665   -918   -418       O  
ATOM    864  CB  GLN A 151       3.556  -9.084   5.586  1.00 84.03           C  
ANISOU  864  CB  GLN A 151     6932  12891  12104   -555   -716   -540       C  
ATOM    865  CG  GLN A 151       4.945  -9.611   5.796  1.00 93.52           C  
ANISOU  865  CG  GLN A 151     7682  14134  13719   -542   -779   -516       C  
ATOM    866  CD  GLN A 151       5.214 -10.833   4.986  1.00 99.58           C  
ANISOU  866  CD  GLN A 151     8157  14837  14844   -366   -565   -649       C  
ATOM    867  OE1 GLN A 151       4.414 -11.770   4.976  1.00100.94           O  
ANISOU  867  OE1 GLN A 151     8401  14893  15057   -181   -546   -649       O  
ATOM    868  NE2 GLN A 151       6.360 -10.852   4.311  1.00 99.52           N  
ANISOU  868  NE2 GLN A 151     7806  14899  15108   -430   -390   -775       N  
ATOM    869  N   THR A 152       2.017  -6.590   4.741  1.00 89.32           N  
ANISOU  869  N   THR A 152     8383  13581  11973   -848   -564   -625       N  
ATOM    870  CA  THR A 152       0.773  -6.011   4.258  1.00 87.67           C  
ANISOU  870  CA  THR A 152     8544  13315  11453   -851   -484   -660       C  
ATOM    871  C   THR A 152       0.159  -6.940   3.232  1.00 72.75           C  
ANISOU  871  C   THR A 152     6632  11389   9620   -721   -275   -765       C  
ATOM    872  O   THR A 152       0.867  -7.595   2.473  1.00 70.43           O  
ANISOU  872  O   THR A 152     6085  11132   9544   -719    -99   -871       O  
ATOM    873  CB  THR A 152       0.993  -4.614   3.641  1.00 95.33           C  
ANISOU  873  CB  THR A 152     9704  14315  12202  -1084   -410   -701       C  
ATOM    874  OG1 THR A 152       2.170  -4.641   2.822  1.00 98.88           O  
ANISOU  874  OG1 THR A 152     9897  14858  12814  -1222   -245   -792       O  
ATOM    875  CG2 THR A 152       1.167  -3.558   4.740  1.00 98.49           C  
ANISOU  875  CG2 THR A 152    10257  14708  12458  -1207   -632   -600       C  
ATOM    876  N   LEU A 153      -1.162  -7.046   3.261  1.00 72.21           N  
ANISOU  876  N   LEU A 153     6816  11249   9373   -613   -292   -745       N  
ATOM    877  CA  LEU A 153      -1.876  -7.735   2.201  1.00 69.77           C  
ANISOU  877  CA  LEU A 153     6549  10910   9050   -536   -102   -844       C  
ATOM    878  C   LEU A 153      -1.467  -7.090   0.878  1.00 63.97           C  
ANISOU  878  C   LEU A 153     5858  10233   8214   -728    106   -957       C  
ATOM    879  O   LEU A 153      -1.475  -5.865   0.758  1.00 65.79           O  
ANISOU  879  O   LEU A 153     6286  10476   8237   -887     69   -923       O  
ATOM    880  CB  LEU A 153      -3.373  -7.641   2.435  1.00 58.88           C  
ANISOU  880  CB  LEU A 153     5455   9461   7457   -435   -174   -791       C  
ATOM    881  CG  LEU A 153      -4.370  -8.366   1.538  1.00 60.67           C  
ANISOU  881  CG  LEU A 153     5763   9653   7636   -348    -37   -862       C  
ATOM    882  CD1 LEU A 153      -4.371  -9.865   1.758  1.00 62.57           C  
ANISOU  882  CD1 LEU A 153     5799   9856   8117   -182    -14   -882       C  
ATOM    883  CD2 LEU A 153      -5.746  -7.800   1.830  1.00 52.22           C  
ANISOU  883  CD2 LEU A 153     4980   8532   6330   -298   -137   -793       C  
ATOM    884  N   PRO A 154      -1.054  -7.907  -0.098  1.00 59.53           N  
ANISOU  884  N   PRO A 154     5116   9703   7801   -732    329  -1095       N  
ATOM    885  CA  PRO A 154      -0.677  -7.360  -1.412  1.00 64.16           C  
ANISOU  885  CA  PRO A 154     5758  10361   8260   -951    552  -1214       C  
ATOM    886  C   PRO A 154      -1.840  -6.584  -2.065  1.00 62.71           C  
ANISOU  886  C   PRO A 154     5954  10144   7730  -1036    544  -1176       C  
ATOM    887  O   PRO A 154      -2.964  -7.092  -2.096  1.00 64.56           O  
ANISOU  887  O   PRO A 154     6319  10316   7896   -897    508  -1156       O  
ATOM    888  CB  PRO A 154      -0.326  -8.610  -2.219  1.00 63.52           C  
ANISOU  888  CB  PRO A 154     5445  10294   8397   -896    797  -1385       C  
ATOM    889  CG  PRO A 154       0.061  -9.631  -1.190  1.00 60.12           C  
ANISOU  889  CG  PRO A 154     4729   9806   8307   -673    680  -1343       C  
ATOM    890  CD  PRO A 154      -0.874  -9.367  -0.037  1.00 57.34           C  
ANISOU  890  CD  PRO A 154     4580   9387   7820   -552    397  -1158       C  
ATOM    891  N   VAL A 155      -1.562  -5.383  -2.573  1.00 53.06           N  
ANISOU  891  N   VAL A 155     5248   8273   6638    -86    293   -458       N  
ATOM    892  CA  VAL A 155      -2.583  -4.483  -3.124  1.00 57.34           C  
ANISOU  892  CA  VAL A 155     6024   8732   7030   -160    307   -435       C  
ATOM    893  C   VAL A 155      -3.574  -5.127  -4.113  1.00 57.42           C  
ANISOU  893  C   VAL A 155     6145   8663   7007   -109    360   -433       C  
ATOM    894  O   VAL A 155      -4.726  -4.702  -4.205  1.00 59.64           O  
ANISOU  894  O   VAL A 155     6592   8886   7182    -96    315   -387       O  
ATOM    895  CB  VAL A 155      -1.922  -3.288  -3.825  1.00 65.40           C  
ANISOU  895  CB  VAL A 155     7113   9767   7969   -344    400   -494       C  
ATOM    896  CG1 VAL A 155      -2.948  -2.205  -4.128  1.00 65.94           C  
ANISOU  896  CG1 VAL A 155     7438   9740   7875   -395    384   -446       C  
ATOM    897  CG2 VAL A 155      -0.821  -2.727  -2.947  1.00 70.78           C  
ANISOU  897  CG2 VAL A 155     7655  10547   8692   -423    366   -525       C  
ATOM    898  N   ILE A 156      -3.149  -6.153  -4.843  1.00 61.99           N  
ANISOU  898  N   ILE A 156     6630   9248   7676    -78    453   -491       N  
ATOM    899  CA  ILE A 156      -4.061  -6.810  -5.784  1.00 61.67           C  
ANISOU  899  CA  ILE A 156     6691   9143   7598    -48    504   -506       C  
ATOM    900  C   ILE A 156      -5.250  -7.399  -5.028  1.00 56.26           C  
ANISOU  900  C   ILE A 156     6048   8411   6917     69    401   -435       C  
ATOM    901  O   ILE A 156      -6.380  -7.353  -5.506  1.00 59.49           O  
ANISOU  901  O   ILE A 156     6587   8783   7234     70    388   -425       O  
ATOM    902  CB  ILE A 156      -3.349  -7.918  -6.641  1.00 48.47           C  
ANISOU  902  CB  ILE A 156     4907   7476   6034    -34    636   -595       C  
ATOM    903  CG1 ILE A 156      -4.356  -8.599  -7.571  1.00 43.14           C  
ANISOU  903  CG1 ILE A 156     4347   6738   5306    -19    685   -621       C  
ATOM    904  CG2 ILE A 156      -2.642  -8.978  -5.763  1.00 47.45           C  
ANISOU  904  CG2 ILE A 156     4582   7364   6081     98    611   -589       C  
ATOM    905  CD1 ILE A 156      -4.984  -7.649  -8.537  1.00 46.98           C  
ANISOU  905  CD1 ILE A 156     5019   7218   5612   -127    704   -626       C  
ATOM    906  N   TYR A 157      -5.001  -7.925  -3.837  1.00 55.21           N  
ANISOU  906  N   TYR A 157     5806   8290   6881    164    326   -388       N  
ATOM    907  CA  TYR A 157      -6.075  -8.461  -3.012  1.00 50.67           C  
ANISOU  907  CA  TYR A 157     5276   7670   6304    258    241   -319       C  
ATOM    908  C   TYR A 157      -6.934  -7.333  -2.461  1.00 51.02           C  
ANISOU  908  C   TYR A 157     5442   7719   6225    229    148   -265       C  
ATOM    909  O   TYR A 157      -8.163  -7.466  -2.384  1.00 52.63           O  
ANISOU  909  O   TYR A 157     5733   7890   6372    262    113   -241       O  
ATOM    910  CB  TYR A 157      -5.523  -9.303  -1.872  1.00 49.12           C  
ANISOU  910  CB  TYR A 157     4956   7480   6229    368    187   -272       C  
ATOM    911  CG  TYR A 157      -4.929 -10.609  -2.338  1.00 49.56           C  
ANISOU  911  CG  TYR A 157     4915   7499   6418    440    275   -315       C  
ATOM    912  CD1 TYR A 157      -5.703 -11.571  -2.994  1.00 49.26           C  
ANISOU  912  CD1 TYR A 157     4946   7375   6395    463    349   -345       C  
ATOM    913  CD2 TYR A 157      -3.583 -10.869  -2.143  1.00 54.34           C  
ANISOU  913  CD2 TYR A 157     5355   8159   7133    486    291   -337       C  
ATOM    914  CE1 TYR A 157      -5.134 -12.772  -3.426  1.00 56.88           C  
ANISOU  914  CE1 TYR A 157     5839   8287   7487    531    445   -393       C  
ATOM    915  CE2 TYR A 157      -3.003 -12.053  -2.566  1.00 58.11           C  
ANISOU  915  CE2 TYR A 157     5741   8595   7742    575    379   -381       C  
ATOM    916  CZ  TYR A 157      -3.767 -13.002  -3.200  1.00 60.50           C  
ANISOU  916  CZ  TYR A 157     6136   8789   8063    599    461   -407       C  
ATOM    917  OH  TYR A 157      -3.139 -14.165  -3.592  1.00 56.80           O  
ANISOU  917  OH  TYR A 157     5589   8262   7731    692    559   -457       O  
ATOM    918  N   VAL A 158      -6.301  -6.223  -2.083  1.00 44.91           N  
ANISOU  918  N   VAL A 158     4668   6987   5408    162    117   -258       N  
ATOM    919  CA  VAL A 158      -7.066  -5.076  -1.623  1.00 48.17           C  
ANISOU  919  CA  VAL A 158     5214   7387   5704    136     46   -217       C  
ATOM    920  C   VAL A 158      -8.055  -4.634  -2.711  1.00 57.56           C  
ANISOU  920  C   VAL A 158     6555   8533   6782    113     79   -231       C  
ATOM    921  O   VAL A 158      -9.249  -4.475  -2.458  1.00 61.11           O  
ANISOU  921  O   VAL A 158     7087   8962   7169    167     21   -198       O  
ATOM    922  CB  VAL A 158      -6.173  -3.890  -1.242  1.00 50.47           C  
ANISOU  922  CB  VAL A 158     5507   7713   5958     39     34   -226       C  
ATOM    923  CG1 VAL A 158      -7.048  -2.733  -0.818  1.00 53.79           C  
ANISOU  923  CG1 VAL A 158     6090   8091   6257     24    -25   -189       C  
ATOM    924  CG2 VAL A 158      -5.203  -4.270  -0.122  1.00 43.48           C  
ANISOU  924  CG2 VAL A 158     4456   6899   5165     64    -22   -216       C  
ATOM    925  N   LYS A 159      -7.547  -4.479  -3.928  1.00 59.49           N  
ANISOU  925  N   LYS A 159     6828   8775   7000     36    172   -284       N  
ATOM    926  CA  LYS A 159      -8.361  -4.148  -5.092  1.00 52.06           C  
ANISOU  926  CA  LYS A 159     6032   7806   5942     15    201   -297       C  
ATOM    927  C   LYS A 159      -9.512  -5.138  -5.294  1.00 49.99           C  
ANISOU  927  C   LYS A 159     5763   7544   5688     98    176   -302       C  
ATOM    928  O   LYS A 159     -10.670  -4.741  -5.381  1.00 47.29           O  
ANISOU  928  O   LYS A 159     5516   7199   5252    139    115   -278       O  
ATOM    929  CB  LYS A 159      -7.472  -4.107  -6.342  1.00 46.37           C  
ANISOU  929  CB  LYS A 159     5324   7091   5204    -88    324   -360       C  
ATOM    930  CG  LYS A 159      -6.498  -2.959  -6.327  1.00 53.16           C  
ANISOU  930  CG  LYS A 159     6225   7949   6023   -204    366   -366       C  
ATOM    931  CD  LYS A 159      -5.638  -2.893  -7.568  1.00 57.07           C  
ANISOU  931  CD  LYS A 159     6740   8454   6491   -324    506   -435       C  
ATOM    932  CE  LYS A 159      -4.666  -1.720  -7.472  1.00 56.68           C  
ANISOU  932  CE  LYS A 159     6733   8402   6402   -465    559   -448       C  
ATOM    933  NZ  LYS A 159      -3.569  -1.817  -8.493  1.00 62.41           N  
ANISOU  933  NZ  LYS A 159     7417   9160   7137   -599    718   -534       N  
ATOM    934  N   LEU A 160      -9.187  -6.424  -5.342  1.00 47.65           N  
ANISOU  934  N   LEU A 160     5349   7250   5506    123    227   -339       N  
ATOM    935  CA  LEU A 160     -10.193  -7.460  -5.533  1.00 53.75           C  
ANISOU  935  CA  LEU A 160     6114   8013   6294    173    224   -359       C  
ATOM    936  C   LEU A 160     -11.289  -7.425  -4.480  1.00 61.19           C  
ANISOU  936  C   LEU A 160     7069   8959   7222    243    126   -306       C  
ATOM    937  O   LEU A 160     -12.475  -7.352  -4.807  1.00 61.60           O  
ANISOU  937  O   LEU A 160     7179   9032   7194    259     91   -316       O  
ATOM    938  CB  LEU A 160      -9.535  -8.830  -5.514  1.00 58.20           C  
ANISOU  938  CB  LEU A 160     6562   8551   7001    196    301   -399       C  
ATOM    939  CG  LEU A 160      -8.919  -9.223  -6.854  1.00 61.64           C  
ANISOU  939  CG  LEU A 160     6996   8985   7441    132    424   -486       C  
ATOM    940  CD1 LEU A 160      -8.115 -10.500  -6.676  1.00 60.30           C  
ANISOU  940  CD1 LEU A 160     6704   8775   7434    180    503   -522       C  
ATOM    941  CD2 LEU A 160     -10.006  -9.375  -7.925  1.00 52.92           C  
ANISOU  941  CD2 LEU A 160     5992   7891   6223     94    439   -536       C  
ATOM    942  N   TYR A 161     -10.877  -7.485  -3.214  1.00 63.32           N  
ANISOU  942  N   TYR A 161     7275   9219   7563    283     82   -253       N  
ATOM    943  CA  TYR A 161     -11.808  -7.545  -2.101  1.00 47.70           C  
ANISOU  943  CA  TYR A 161     5305   7243   5577    340      6   -205       C  
ATOM    944  C   TYR A 161     -12.641  -6.273  -2.038  1.00 50.75           C  
ANISOU  944  C   TYR A 161     5790   7651   5840    345    -60   -186       C  
ATOM    945  O   TYR A 161     -13.876  -6.332  -1.945  1.00 55.59           O  
ANISOU  945  O   TYR A 161     6430   8286   6407    382    -95   -191       O  
ATOM    946  CB  TYR A 161     -11.066  -7.752  -0.794  1.00 51.10           C  
ANISOU  946  CB  TYR A 161     5665   7667   6084    375    -31   -150       C  
ATOM    947  CG  TYR A 161     -10.270  -9.042  -0.710  1.00 53.73           C  
ANISOU  947  CG  TYR A 161     5902   7968   6546    410     21   -153       C  
ATOM    948  CD1 TYR A 161     -10.470 -10.081  -1.619  1.00 50.51           C  
ANISOU  948  CD1 TYR A 161     5485   7520   6185    407    107   -210       C  
ATOM    949  CD2 TYR A 161      -9.323  -9.221   0.294  1.00 50.69           C  
ANISOU  949  CD2 TYR A 161     5438   7593   6230    454    -20   -103       C  
ATOM    950  CE1 TYR A 161      -9.740 -11.257  -1.529  1.00 54.52           C  
ANISOU  950  CE1 TYR A 161     5919   7977   6817    456    163   -214       C  
ATOM    951  CE2 TYR A 161      -8.585 -10.395   0.393  1.00 51.25           C  
ANISOU  951  CE2 TYR A 161     5423   7628   6420    517     19    -98       C  
ATOM    952  CZ  TYR A 161      -8.795 -11.407  -0.508  1.00 57.75           C  
ANISOU  952  CZ  TYR A 161     6251   8391   7300    524    116   -151       C  
ATOM    953  OH  TYR A 161      -8.048 -12.564  -0.391  1.00 61.55           O  
ANISOU  953  OH  TYR A 161     6661   8818   7908    604    162   -146       O  
ATOM    954  N   MET A 162     -11.979  -5.120  -2.089  1.00 43.98           N  
ANISOU  954  N   MET A 162     4989   6789   4932    308    -71   -170       N  
ATOM    955  CA  MET A 162     -12.706  -3.860  -1.998  1.00 41.04           C  
ANISOU  955  CA  MET A 162     4735   6411   4446    327   -127   -147       C  
ATOM    956  C   MET A 162     -13.700  -3.678  -3.123  1.00 55.52           C  
ANISOU  956  C   MET A 162     6647   8261   6187    351   -131   -171       C  
ATOM    957  O   MET A 162     -14.847  -3.274  -2.871  1.00 59.16           O  
ANISOU  957  O   MET A 162     7148   8742   6587    421   -192   -161       O  
ATOM    958  CB  MET A 162     -11.737  -2.692  -1.948  1.00 48.02           C  
ANISOU  958  CB  MET A 162     5687   7265   5292    261   -116   -133       C  
ATOM    959  CG  MET A 162     -11.028  -2.638  -0.597  1.00 55.85           C  
ANISOU  959  CG  MET A 162     6607   8268   6346    248   -150   -108       C  
ATOM    960  SD  MET A 162     -12.227  -2.832   0.755  1.00 61.34           S  
ANISOU  960  SD  MET A 162     7296   8975   7034    341   -229    -71       S  
ATOM    961  CE  MET A 162     -13.133  -1.303   0.560  1.00 45.65           C  
ANISOU  961  CE  MET A 162     5479   6948   4916    369   -259    -66       C  
ATOM    962  N   TYR A 163     -13.282  -4.020  -4.349  1.00 51.98           N  
ANISOU  962  N   TYR A 163     6210   7815   5724    298    -68   -211       N  
ATOM    963  CA  TYR A 163     -14.155  -3.900  -5.501  1.00 45.12           C  
ANISOU  963  CA  TYR A 163     5416   6977   4749    315    -80   -236       C  
ATOM    964  C   TYR A 163     -15.420  -4.736  -5.320  1.00 48.08           C  
ANISOU  964  C   TYR A 163     5718   7413   5139    372   -122   -267       C  
ATOM    965  O   TYR A 163     -16.540  -4.235  -5.468  1.00 51.86           O  
ANISOU  965  O   TYR A 163     6238   7937   5530    439   -193   -265       O  
ATOM    966  CB  TYR A 163     -13.421  -4.332  -6.770  1.00 47.13           C  
ANISOU  966  CB  TYR A 163     5685   7232   4991    232     10   -285       C  
ATOM    967  CG  TYR A 163     -14.251  -4.295  -8.025  1.00 52.39           C  
ANISOU  967  CG  TYR A 163     6432   7944   5529    237     -6   -316       C  
ATOM    968  CD1 TYR A 163     -14.364  -3.128  -8.782  1.00 50.72           C  
ANISOU  968  CD1 TYR A 163     6386   7718   5168    241    -32   -279       C  
ATOM    969  CD2 TYR A 163     -14.922  -5.437  -8.461  1.00 54.24           C  
ANISOU  969  CD2 TYR A 163     6590   8236   5784    235      3   -383       C  
ATOM    970  CE1 TYR A 163     -15.139  -3.098  -9.931  1.00 46.07           C  
ANISOU  970  CE1 TYR A 163     5875   7186   4444    259    -65   -299       C  
ATOM    971  CE2 TYR A 163     -15.671  -5.428  -9.595  1.00 53.22           C  
ANISOU  971  CE2 TYR A 163     6522   8172   5528    233    -23   -420       C  
ATOM    972  CZ  TYR A 163     -15.786  -4.261 -10.330  1.00 52.82           C  
ANISOU  972  CZ  TYR A 163     6628   8122   5321    252    -66   -375       C  
ATOM    973  OH  TYR A 163     -16.562  -4.287 -11.455  1.00 52.48           O  
ANISOU  973  OH  TYR A 163     6645   8158   5135    262   -110   -407       O  
ATOM    974  N   GLN A 164     -15.249  -5.998  -4.963  1.00 44.03           N  
ANISOU  974  N   GLN A 164     5093   6898   4738    349    -75   -299       N  
ATOM    975  CA  GLN A 164     -16.396  -6.863  -4.777  1.00 43.13           C  
ANISOU  975  CA  GLN A 164     4912   6832   4642    371    -91   -339       C  
ATOM    976  C   GLN A 164     -17.281  -6.378  -3.605  1.00 52.59           C  
ANISOU  976  C   GLN A 164     6097   8055   5829    441   -164   -303       C  
ATOM    977  O   GLN A 164     -18.515  -6.499  -3.652  1.00 49.25           O  
ANISOU  977  O   GLN A 164     5643   7705   5365    472   -202   -340       O  
ATOM    978  CB  GLN A 164     -15.931  -8.289  -4.549  1.00 38.85           C  
ANISOU  978  CB  GLN A 164     4287   6249   4226    329     -9   -371       C  
ATOM    979  CG  GLN A 164     -15.170  -8.865  -5.707  1.00 37.95           C  
ANISOU  979  CG  GLN A 164     4177   6113   4128    267     78   -427       C  
ATOM    980  CD  GLN A 164     -14.652 -10.256  -5.417  1.00 49.23           C  
ANISOU  980  CD  GLN A 164     5535   7477   5694    249    165   -455       C  
ATOM    981  OE1 GLN A 164     -15.384 -11.244  -5.516  1.00 48.11           O  
ANISOU  981  OE1 GLN A 164     5369   7332   5577    225    199   -509       O  
ATOM    982  NE2 GLN A 164     -13.382 -10.338  -5.004  1.00 54.31           N  
ANISOU  982  NE2 GLN A 164     6143   8064   6428    264    201   -418       N  
ATOM    983  N   LEU A 165     -16.670  -5.791  -2.576  1.00 55.23           N  
ANISOU  983  N   LEU A 165     6450   8342   6195    460   -182   -241       N  
ATOM    984  CA  LEU A 165     -17.473  -5.232  -1.487  1.00 57.86           C  
ANISOU  984  CA  LEU A 165     6786   8695   6504    521   -240   -214       C  
ATOM    985  C   LEU A 165     -18.340  -4.094  -2.063  1.00 54.77           C  
ANISOU  985  C   LEU A 165     6470   8343   5996    591   -303   -219       C  
ATOM    986  O   LEU A 165     -19.547  -4.045  -1.840  1.00 56.78           O  
ANISOU  986  O   LEU A 165     6688   8666   6221    651   -343   -247       O  
ATOM    987  CB  LEU A 165     -16.590  -4.749  -0.306  1.00 45.46           C  
ANISOU  987  CB  LEU A 165     5232   7070   4969    517   -249   -154       C  
ATOM    988  CG  LEU A 165     -17.290  -3.947   0.808  1.00 47.46           C  
ANISOU  988  CG  LEU A 165     5518   7335   5181    573   -300   -131       C  
ATOM    989  CD1 LEU A 165     -18.515  -4.691   1.282  1.00 42.22           C  
ANISOU  989  CD1 LEU A 165     4781   6728   4531    599   -298   -164       C  
ATOM    990  CD2 LEU A 165     -16.391  -3.627   2.020  1.00 47.21           C  
ANISOU  990  CD2 LEU A 165     5498   7263   5175    548   -310    -84       C  
ATOM    991  N   PHE A 166     -17.751  -3.206  -2.846  1.00 49.41           N  
ANISOU  991  N   PHE A 166     5900   7625   5250    585   -308   -196       N  
ATOM    992  CA  PHE A 166     -18.537  -2.106  -3.374  1.00 50.62           C  
ANISOU  992  CA  PHE A 166     6152   7796   5286    673   -372   -184       C  
ATOM    993  C   PHE A 166     -19.644  -2.568  -4.325  1.00 57.96           C  
ANISOU  993  C   PHE A 166     7034   8831   6158    714   -411   -237       C  
ATOM    994  O   PHE A 166     -20.679  -1.915  -4.430  1.00 62.56           O  
ANISOU  994  O   PHE A 166     7637   9468   6665    823   -486   -239       O  
ATOM    995  CB  PHE A 166     -17.636  -1.095  -4.047  1.00 49.80           C  
ANISOU  995  CB  PHE A 166     6203   7609   5111    643   -354   -141       C  
ATOM    996  CG  PHE A 166     -16.836  -0.277  -3.070  1.00 60.17           C  
ANISOU  996  CG  PHE A 166     7579   8835   6450    616   -338    -99       C  
ATOM    997  CD1 PHE A 166     -17.477   0.496  -2.115  1.00 60.22           C  
ANISOU  997  CD1 PHE A 166     7623   8821   6437    699   -384    -81       C  
ATOM    998  CD2 PHE A 166     -15.452  -0.300  -3.086  1.00 58.44           C  
ANISOU  998  CD2 PHE A 166     7368   8563   6273    502   -272    -92       C  
ATOM    999  CE1 PHE A 166     -16.759   1.246  -1.233  1.00 59.96           C  
ANISOU  999  CE1 PHE A 166     7655   8711   6415    659   -367    -56       C  
ATOM   1000  CE2 PHE A 166     -14.729   0.443  -2.199  1.00 54.18           C  
ANISOU 1000  CE2 PHE A 166     6874   7963   5749    461   -263    -68       C  
ATOM   1001  CZ  PHE A 166     -15.378   1.221  -1.278  1.00 60.24           C  
ANISOU 1001  CZ  PHE A 166     7697   8705   6486    533   -311    -50       C  
ATOM   1002  N   ARG A 167     -19.438  -3.686  -5.008  1.00 53.62           N  
ANISOU 1002  N   ARG A 167     6416   8316   5641    631   -362   -289       N  
ATOM   1003  CA  ARG A 167     -20.494  -4.243  -5.857  1.00 51.47           C  
ANISOU 1003  CA  ARG A 167     6083   8162   5313    644   -398   -359       C  
ATOM   1004  C   ARG A 167     -21.672  -4.696  -4.998  1.00 57.53           C  
ANISOU 1004  C   ARG A 167     6718   9014   6125    683   -426   -405       C  
ATOM   1005  O   ARG A 167     -22.828  -4.364  -5.277  1.00 59.58           O  
ANISOU 1005  O   ARG A 167     6938   9385   6313    765   -504   -439       O  
ATOM   1006  CB  ARG A 167     -19.969  -5.412  -6.685  1.00 51.19           C  
ANISOU 1006  CB  ARG A 167     6009   8130   5311    527   -319   -419       C  
ATOM   1007  CG  ARG A 167     -19.339  -5.007  -7.988  1.00 57.69           C  
ANISOU 1007  CG  ARG A 167     6950   8936   6035    493   -305   -412       C  
ATOM   1008  CD  ARG A 167     -19.184  -6.244  -8.856  1.00 68.23           C  
ANISOU 1008  CD  ARG A 167     8232  10305   7389    388   -232   -501       C  
ATOM   1009  NE  ARG A 167     -20.443  -6.603  -9.508  1.00 69.06           N  
ANISOU 1009  NE  ARG A 167     8282  10549   7409    399   -296   -577       N  
ATOM   1010  CZ  ARG A 167     -20.605  -7.683 -10.260  1.00 64.35           C  
ANISOU 1010  CZ  ARG A 167     7636  10005   6811    302   -245   -677       C  
ATOM   1011  NH1 ARG A 167     -19.605  -8.540 -10.428  1.00 63.96           N  
ANISOU 1011  NH1 ARG A 167     7587   9864   6850    204   -120   -708       N  
ATOM   1012  NH2 ARG A 167     -21.777  -7.932 -10.805  1.00 68.74           N  
ANISOU 1012  NH2 ARG A 167     8131  10707   7281    305   -316   -754       N  
ATOM   1013  N   SER A 168     -21.374  -5.444  -3.936  1.00 58.14           N  
ANISOU 1013  N   SER A 168     6729   9046   6318    627   -363   -404       N  
ATOM   1014  CA  SER A 168     -22.428  -5.956  -3.063  1.00 47.39           C  
ANISOU 1014  CA  SER A 168     5253   7754   4998    636   -363   -449       C  
ATOM   1015  C   SER A 168     -23.208  -4.780  -2.483  1.00 44.27           C  
ANISOU 1015  C   SER A 168     4870   7401   4548    762   -438   -427       C  
ATOM   1016  O   SER A 168     -24.434  -4.832  -2.379  1.00 54.44           O  
ANISOU 1016  O   SER A 168     6060   8809   5815    808   -473   -490       O  
ATOM   1017  CB  SER A 168     -21.854  -6.860  -1.970  1.00 49.47           C  
ANISOU 1017  CB  SER A 168     5484   7935   5375    562   -281   -428       C  
ATOM   1018  OG  SER A 168     -21.029  -6.152  -1.067  1.00 54.59           O  
ANISOU 1018  OG  SER A 168     6202   8496   6045    594   -288   -344       O  
ATOM   1019  N   LEU A 169     -22.510  -3.705  -2.133  1.00 45.07           N  
ANISOU 1019  N   LEU A 169     5090   7408   4627    815   -457   -349       N  
ATOM   1020  CA  LEU A 169     -23.193  -2.486  -1.662  1.00 44.87           C  
ANISOU 1020  CA  LEU A 169     5106   7395   4546    947   -520   -329       C  
ATOM   1021  C   LEU A 169     -24.043  -1.805  -2.753  1.00 51.72           C  
ANISOU 1021  C   LEU A 169     5997   8347   5306   1065   -609   -347       C  
ATOM   1022  O   LEU A 169     -25.173  -1.372  -2.480  1.00 55.03           O  
ANISOU 1022  O   LEU A 169     6353   8857   5699   1183   -664   -382       O  
ATOM   1023  CB  LEU A 169     -22.169  -1.493  -1.107  1.00 39.41           C  
ANISOU 1023  CB  LEU A 169     4558   6566   3849    955   -508   -250       C  
ATOM   1024  CG  LEU A 169     -21.464  -2.016   0.152  1.00 38.12           C  
ANISOU 1024  CG  LEU A 169     4363   6346   3775    868   -448   -230       C  
ATOM   1025  CD1 LEU A 169     -20.526  -0.935   0.650  1.00 38.42           C  
ANISOU 1025  CD1 LEU A 169     4533   6273   3792    867   -448   -170       C  
ATOM   1026  CD2 LEU A 169     -22.481  -2.465   1.224  1.00 45.30           C  
ANISOU 1026  CD2 LEU A 169     5165   7328   4719    887   -435   -273       C  
ATOM   1027  N   ALA A 170     -23.486  -1.677  -3.970  1.00 45.54           N  
ANISOU 1027  N   ALA A 170     5309   7540   4456   1042   -625   -323       N  
ATOM   1028  CA  ALA A 170     -24.199  -1.044  -5.082  1.00 47.87           C  
ANISOU 1028  CA  ALA A 170     5651   7911   4625   1157   -720   -324       C  
ATOM   1029  C   ALA A 170     -25.521  -1.768  -5.273  1.00 50.36           C  
ANISOU 1029  C   ALA A 170     5777   8419   4938   1185   -770   -423       C  
ATOM   1030  O   ALA A 170     -26.573  -1.145  -5.456  1.00 48.79           O  
ANISOU 1030  O   ALA A 170     5540   8324   4673   1337   -866   -441       O  
ATOM   1031  CB  ALA A 170     -23.369  -1.068  -6.367  1.00 42.62           C  
ANISOU 1031  CB  ALA A 170     5107   7202   3883   1087   -708   -294       C  
ATOM   1032  N   TYR A 171     -25.445  -3.087  -5.142  1.00 47.50           N  
ANISOU 1032  N   TYR A 171     5293   8098   4657   1037   -697   -492       N  
ATOM   1033  CA  TYR A 171     -26.590  -3.962  -5.284  1.00 52.48           C  
ANISOU 1033  CA  TYR A 171     5738   8905   5297   1007   -715   -606       C  
ATOM   1034  C   TYR A 171     -27.639  -3.801  -4.185  1.00 58.57           C  
ANISOU 1034  C   TYR A 171     6378   9760   6116   1079   -724   -651       C  
ATOM   1035  O   TYR A 171     -28.821  -3.561  -4.493  1.00 57.84           O  
ANISOU 1035  O   TYR A 171     6169   9838   5970   1178   -809   -717       O  
ATOM   1036  CB  TYR A 171     -26.123  -5.408  -5.325  1.00 50.98           C  
ANISOU 1036  CB  TYR A 171     5490   8692   5189    817   -607   -663       C  
ATOM   1037  CG  TYR A 171     -27.243  -6.401  -5.472  1.00 54.15           C  
ANISOU 1037  CG  TYR A 171     5712   9260   5603    742   -601   -795       C  
ATOM   1038  CD1 TYR A 171     -27.986  -6.486  -6.652  1.00 62.71           C  
ANISOU 1038  CD1 TYR A 171     6733  10511   6583    754   -685   -874       C  
ATOM   1039  CD2 TYR A 171     -27.518  -7.294  -4.473  1.00 54.80           C  
ANISOU 1039  CD2 TYR A 171     5697   9334   5789    642   -506   -844       C  
ATOM   1040  CE1 TYR A 171     -29.006  -7.425  -6.792  1.00 62.15           C  
ANISOU 1040  CE1 TYR A 171     6484  10608   6522    658   -674  -1014       C  
ATOM   1041  CE2 TYR A 171     -28.521  -8.221  -4.599  1.00 62.51           C  
ANISOU 1041  CE2 TYR A 171     6519  10456   6778    544   -480   -975       C  
ATOM   1042  CZ  TYR A 171     -29.267  -8.292  -5.750  1.00 63.45           C  
ANISOU 1042  CZ  TYR A 171     6555  10750   6802    545   -562  -1068       C  
ATOM   1043  OH  TYR A 171     -30.270  -9.241  -5.817  1.00 66.69           O  
ANISOU 1043  OH  TYR A 171     6796  11316   7228    421   -528  -1215       O  
ATOM   1044  N   ILE A 172     -27.235  -3.923  -2.910  1.00 58.62           N  
ANISOU 1044  N   ILE A 172     6395   9663   6215   1034   -641   -620       N  
ATOM   1045  CA  ILE A 172     -28.223  -3.831  -1.830  1.00 47.87           C  
ANISOU 1045  CA  ILE A 172     4913   8382   4893   1082   -628   -671       C  
ATOM   1046  C   ILE A 172     -28.759  -2.403  -1.732  1.00 52.40           C  
ANISOU 1046  C   ILE A 172     5529   8976   5404   1291   -717   -641       C  
ATOM   1047  O   ILE A 172     -29.940  -2.194  -1.449  1.00 56.36           O  
ANISOU 1047  O   ILE A 172     5892   9621   5902   1386   -752   -715       O  
ATOM   1048  CB  ILE A 172     -27.671  -4.277  -0.453  1.00 50.41           C  
ANISOU 1048  CB  ILE A 172     5257   8590   5307    985   -519   -640       C  
ATOM   1049  CG1 ILE A 172     -26.480  -3.428  -0.021  1.00 52.68           C  
ANISOU 1049  CG1 ILE A 172     5722   8701   5593   1020   -517   -525       C  
ATOM   1050  CG2 ILE A 172     -27.323  -5.751  -0.455  1.00 49.51           C  
ANISOU 1050  CG2 ILE A 172     5097   8454   5260    803   -426   -674       C  
ATOM   1051  CD1 ILE A 172     -25.991  -3.753   1.375  1.00 57.28           C  
ANISOU 1051  CD1 ILE A 172     6325   9196   6243    945   -435   -491       C  
ATOM   1052  N   HIS A 173     -27.910  -1.412  -1.977  1.00 49.90           N  
ANISOU 1052  N   HIS A 173     5405   8515   5042   1364   -748   -538       N  
ATOM   1053  CA  HIS A 173     -28.405  -0.042  -1.985  1.00 51.29           C  
ANISOU 1053  CA  HIS A 173     5655   8682   5153   1572   -828   -504       C  
ATOM   1054  C   HIS A 173     -29.423   0.170  -3.131  1.00 55.28           C  
ANISOU 1054  C   HIS A 173     6082   9357   5567   1709   -951   -547       C  
ATOM   1055  O   HIS A 173     -30.290   1.028  -3.029  1.00 69.32           O  
ANISOU 1055  O   HIS A 173     7832  11196   7309   1906  -1024   -558       O  
ATOM   1056  CB  HIS A 173     -27.246   0.959  -2.073  1.00 49.79           C  
ANISOU 1056  CB  HIS A 173     5711   8285   4923   1596   -821   -388       C  
ATOM   1057  CG  HIS A 173     -26.387   0.998  -0.843  1.00 60.48           C  
ANISOU 1057  CG  HIS A 173     7129   9500   6351   1499   -727   -354       C  
ATOM   1058  ND1 HIS A 173     -25.367   1.909  -0.674  1.00 62.88           N  
ANISOU 1058  ND1 HIS A 173     7632   9628   6631   1495   -707   -271       N  
ATOM   1059  CD2 HIS A 173     -26.400   0.230   0.275  1.00 58.31           C  
ANISOU 1059  CD2 HIS A 173     6749   9244   6161   1394   -651   -392       C  
ATOM   1060  CE1 HIS A 173     -24.770   1.684   0.484  1.00 62.74           C  
ANISOU 1060  CE1 HIS A 173     7613   9543   6681   1393   -633   -266       C  
ATOM   1061  NE2 HIS A 173     -25.382   0.678   1.081  1.00 61.17           N  
ANISOU 1061  NE2 HIS A 173     7241   9456   6545   1340   -602   -330       N  
ATOM   1062  N   SER A 174     -29.331  -0.573  -4.231  1.00 51.30           N  
ANISOU 1062  N   SER A 174     5542   8932   5017   1620   -980   -574       N  
ATOM   1063  CA  SER A 174     -30.325  -0.351  -5.299  1.00 60.36           C  
ANISOU 1063  CA  SER A 174     6611  10265   6060   1753  -1115   -617       C  
ATOM   1064  C   SER A 174     -31.746  -0.772  -4.871  1.00 62.32           C  
ANISOU 1064  C   SER A 174     6586  10744   6348   1799  -1144   -751       C  
ATOM   1065  O   SER A 174     -32.725  -0.307  -5.444  1.00 75.09           O  
ANISOU 1065  O   SER A 174     8111  12529   7890   1971  -1271   -788       O  
ATOM   1066  CB  SER A 174     -29.920  -1.049  -6.612  1.00 50.20           C  
ANISOU 1066  CB  SER A 174     5354   9023   4696   1634  -1140   -628       C  
ATOM   1067  OG  SER A 174     -30.196  -2.436  -6.595  1.00 51.93           O  
ANISOU 1067  OG  SER A 174     5393   9359   4979   1447  -1076   -745       O  
ATOM   1068  N   PHE A 175     -31.861  -1.626  -3.858  1.00 56.69           N  
ANISOU 1068  N   PHE A 175     5745  10045   5749   1650  -1027   -823       N  
ATOM   1069  CA  PHE A 175     -33.166  -1.942  -3.271  1.00 54.65           C  
ANISOU 1069  CA  PHE A 175     5236   9991   5537   1676  -1022   -954       C  
ATOM   1070  C   PHE A 175     -33.508  -1.046  -2.077  1.00 55.79           C  
ANISOU 1070  C   PHE A 175     5385  10084   5730   1820   -991   -938       C  
ATOM   1071  O   PHE A 175     -34.545  -1.228  -1.455  1.00 59.78           O  
ANISOU 1071  O   PHE A 175     5686  10746   6280   1842   -966  -1049       O  
ATOM   1072  CB  PHE A 175     -33.236  -3.403  -2.824  1.00 54.22           C  
ANISOU 1072  CB  PHE A 175     5048   9986   5569   1421   -895  -1053       C  
ATOM   1073  CG  PHE A 175     -33.136  -4.386  -3.947  1.00 51.19           C  
ANISOU 1073  CG  PHE A 175     4624   9681   5144   1272   -911  -1109       C  
ATOM   1074  CD1 PHE A 175     -34.201  -4.580  -4.823  1.00 56.39           C  
ANISOU 1074  CD1 PHE A 175     5098  10594   5733   1306  -1015  -1225       C  
ATOM   1075  CD2 PHE A 175     -31.980  -5.120  -4.128  1.00 53.51           C  
ANISOU 1075  CD2 PHE A 175     5057   9806   5468   1100   -823  -1056       C  
ATOM   1076  CE1 PHE A 175     -34.104  -5.488  -5.878  1.00 60.97           C  
ANISOU 1076  CE1 PHE A 175     5652  11250   6264   1152  -1026  -1291       C  
ATOM   1077  CE2 PHE A 175     -31.866  -6.040  -5.177  1.00 59.76           C  
ANISOU 1077  CE2 PHE A 175     5825  10658   6222    958   -822  -1120       C  
ATOM   1078  CZ  PHE A 175     -32.928  -6.222  -6.055  1.00 63.14           C  
ANISOU 1078  CZ  PHE A 175     6086  11332   6571    976   -922  -1239       C  
ATOM   1079  N   GLY A 176     -32.631  -0.112  -1.722  1.00 51.70           N  
ANISOU 1079  N   GLY A 176     5095   9346   5202   1897   -978   -815       N  
ATOM   1080  CA  GLY A 176     -32.879   0.746  -0.572  1.00 56.59           C  
ANISOU 1080  CA  GLY A 176     5744   9897   5862   2018   -936   -807       C  
ATOM   1081  C   GLY A 176     -32.421   0.135   0.761  1.00 61.77           C  
ANISOU 1081  C   GLY A 176     6401  10463   6607   1836   -785   -818       C  
ATOM   1082  O   GLY A 176     -32.559   0.742   1.823  1.00 65.76           O  
ANISOU 1082  O   GLY A 176     6937  10909   7140   1899   -731   -820       O  
ATOM   1083  N   ILE A 177     -31.873  -1.073   0.685  1.00 57.40           N  
ANISOU 1083  N   ILE A 177     5825   9895   6090   1614   -719   -825       N  
ATOM   1084  CA  ILE A 177     -31.359  -1.806   1.830  1.00 57.18           C  
ANISOU 1084  CA  ILE A 177     5814   9777   6132   1437   -588   -819       C  
ATOM   1085  C   ILE A 177     -29.966  -1.354   2.285  1.00 58.56           C  
ANISOU 1085  C   ILE A 177     6215   9724   6310   1402   -557   -693       C  
ATOM   1086  O   ILE A 177     -28.996  -1.349   1.513  1.00 57.53           O  
ANISOU 1086  O   ILE A 177     6208   9494   6158   1366   -588   -617       O  
ATOM   1087  CB  ILE A 177     -31.287  -3.310   1.506  1.00 57.12           C  
ANISOU 1087  CB  ILE A 177     5713   9825   6163   1227   -528   -870       C  
ATOM   1088  CG1 ILE A 177     -32.691  -3.862   1.272  1.00 51.66           C  
ANISOU 1088  CG1 ILE A 177     4778   9372   5476   1211   -532  -1019       C  
ATOM   1089  CG2 ILE A 177     -30.562  -4.068   2.608  1.00 56.54           C  
ANISOU 1089  CG2 ILE A 177     5707   9623   6153   1060   -403   -830       C  
ATOM   1090  CD1 ILE A 177     -32.687  -5.152   0.472  1.00 53.84           C  
ANISOU 1090  CD1 ILE A 177     4980   9713   5762   1031   -507  -1081       C  
ATOM   1091  N   CYS A 178     -29.865  -1.014   3.560  1.00 54.77           N  
ANISOU 1091  N   CYS A 178     5781   9175   5855   1398   -490   -681       N  
ATOM   1092  CA  CYS A 178     -28.584  -0.670   4.146  1.00 52.13           C  
ANISOU 1092  CA  CYS A 178     5633   8654   5522   1341   -459   -581       C  
ATOM   1093  C   CYS A 178     -28.134  -1.819   5.034  1.00 48.43           C  
ANISOU 1093  C   CYS A 178     5140   8157   5105   1156   -364   -574       C  
ATOM   1094  O   CYS A 178     -28.927  -2.374   5.779  1.00 53.30           O  
ANISOU 1094  O   CYS A 178     5645   8862   5744   1106   -297   -643       O  
ATOM   1095  CB  CYS A 178     -28.688   0.625   4.938  1.00 56.63           C  
ANISOU 1095  CB  CYS A 178     6303   9151   6062   1468   -458   -569       C  
ATOM   1096  SG  CYS A 178     -27.136   1.154   5.624  1.00 67.36           S  
ANISOU 1096  SG  CYS A 178     7881  10302   7409   1385   -430   -465       S  
ATOM   1097  N   HIS A 179     -26.880  -2.225   4.904  1.00 50.51           N  
ANISOU 1097  N   HIS A 179     5503   8303   5385   1057   -357   -493       N  
ATOM   1098  CA  HIS A 179     -26.387  -3.355   5.679  1.00 46.56           C  
ANISOU 1098  CA  HIS A 179     4995   7765   4931    907   -280   -470       C  
ATOM   1099  C   HIS A 179     -26.227  -2.968   7.168  1.00 46.20           C  
ANISOU 1099  C   HIS A 179     5015   7670   4869    893   -235   -445       C  
ATOM   1100  O   HIS A 179     -26.694  -3.690   8.065  1.00 42.09           O  
ANISOU 1100  O   HIS A 179     4444   7188   4359    814   -160   -473       O  
ATOM   1101  CB  HIS A 179     -25.079  -3.848   5.093  1.00 39.71           C  
ANISOU 1101  CB  HIS A 179     4201   6796   4091    833   -291   -395       C  
ATOM   1102  CG  HIS A 179     -24.549  -5.075   5.761  1.00 52.84           C  
ANISOU 1102  CG  HIS A 179     5860   8410   5805    706   -223   -362       C  
ATOM   1103  ND1 HIS A 179     -23.656  -5.018   6.814  1.00 50.06           N  
ANISOU 1103  ND1 HIS A 179     5595   7973   5453    672   -211   -287       N  
ATOM   1104  CD2 HIS A 179     -24.766  -6.389   5.519  1.00 54.49           C  
ANISOU 1104  CD2 HIS A 179     6005   8639   6062    611   -164   -391       C  
ATOM   1105  CE1 HIS A 179     -23.359  -6.244   7.203  1.00 48.75           C  
ANISOU 1105  CE1 HIS A 179     5419   7774   5331    580   -155   -260       C  
ATOM   1106  NE2 HIS A 179     -24.013  -7.095   6.431  1.00 58.93           N  
ANISOU 1106  NE2 HIS A 179     6626   9111   6653    539   -118   -322       N  
ATOM   1107  N   ARG A 180     -25.612  -1.803   7.388  1.00 42.07           N  
ANISOU 1107  N   ARG A 180     4615   7062   4308    961   -276   -399       N  
ATOM   1108  CA  ARG A 180     -25.445  -1.178   8.708  1.00 49.15           C  
ANISOU 1108  CA  ARG A 180     5594   7913   5169    959   -246   -388       C  
ATOM   1109  C   ARG A 180     -24.495  -1.920   9.647  1.00 49.43           C  
ANISOU 1109  C   ARG A 180     5681   7891   5209    830   -215   -321       C  
ATOM   1110  O   ARG A 180     -24.358  -1.534  10.785  1.00 47.84           O  
ANISOU 1110  O   ARG A 180     5545   7667   4963    809   -191   -314       O  
ATOM   1111  CB  ARG A 180     -26.807  -1.000   9.412  1.00 44.84           C  
ANISOU 1111  CB  ARG A 180     4963   7468   4607   1011   -190   -480       C  
ATOM   1112  CG  ARG A 180     -27.777  -0.120   8.678  1.00 50.22           C  
ANISOU 1112  CG  ARG A 180     5589   8214   5278   1175   -232   -547       C  
ATOM   1113  CD  ARG A 180     -28.903   0.394   9.570  1.00 53.55           C  
ANISOU 1113  CD  ARG A 180     5951   8713   5682   1252   -173   -639       C  
ATOM   1114  NE  ARG A 180     -29.704  -0.694  10.120  1.00 47.08           N  
ANISOU 1114  NE  ARG A 180     4987   8015   4886   1148    -87   -707       N  
ATOM   1115  CZ  ARG A 180     -30.779  -0.512  10.869  1.00 47.82           C  
ANISOU 1115  CZ  ARG A 180     4988   8209   4973   1181    -12   -805       C  
ATOM   1116  NH1 ARG A 180     -31.170   0.725  11.165  1.00 45.89           N  
ANISOU 1116  NH1 ARG A 180     4783   7951   4703   1336    -18   -847       N  
ATOM   1117  NH2 ARG A 180     -31.470  -1.565  11.302  1.00 51.80           N  
ANISOU 1117  NH2 ARG A 180     5367   8821   5495   1058     80   -869       N  
ATOM   1118  N   ASP A 181     -23.803  -2.946   9.167  1.00 58.46           N  
ANISOU 1118  N   ASP A 181     6803   9010   6400    753   -219   -272       N  
ATOM   1119  CA  ASP A 181     -22.753  -3.555   9.985  1.00 52.05           C  
ANISOU 1119  CA  ASP A 181     6048   8136   5592    665   -212   -194       C  
ATOM   1120  C   ASP A 181     -21.582  -4.027   9.117  1.00 48.34           C  
ANISOU 1120  C   ASP A 181     5584   7608   5175    637   -250   -136       C  
ATOM   1121  O   ASP A 181     -21.107  -5.156   9.262  1.00 48.02           O  
ANISOU 1121  O   ASP A 181     5525   7542   5177    577   -228    -92       O  
ATOM   1122  CB  ASP A 181     -23.314  -4.712  10.840  1.00 55.35           C  
ANISOU 1122  CB  ASP A 181     6430   8587   6014    587   -136   -196       C  
ATOM   1123  CG  ASP A 181     -22.416  -5.045  12.056  1.00 62.98           C  
ANISOU 1123  CG  ASP A 181     7485   9500   6943    526   -139   -110       C  
ATOM   1124  OD1 ASP A 181     -21.642  -4.156  12.471  1.00 56.75           O  
ANISOU 1124  OD1 ASP A 181     6768   8682   6111    544   -195    -80       O  
ATOM   1125  OD2 ASP A 181     -22.478  -6.184  12.594  1.00 62.38           O  
ANISOU 1125  OD2 ASP A 181     7415   9412   6875    459    -87    -73       O  
ATOM   1126  N   ILE A 182     -21.124  -3.157   8.213  1.00 51.90           N  
ANISOU 1126  N   ILE A 182     6068   8030   5621    682   -298   -137       N  
ATOM   1127  CA  ILE A 182     -19.974  -3.481   7.365  1.00 48.12           C  
ANISOU 1127  CA  ILE A 182     5593   7504   5188    650   -321    -95       C  
ATOM   1128  C   ILE A 182     -18.720  -3.457   8.198  1.00 52.86           C  
ANISOU 1128  C   ILE A 182     6236   8060   5788    600   -345    -32       C  
ATOM   1129  O   ILE A 182     -18.335  -2.414   8.737  1.00 48.03           O  
ANISOU 1129  O   ILE A 182     5695   7430   5123    600   -374    -28       O  
ATOM   1130  CB  ILE A 182     -19.755  -2.501   6.156  1.00 41.84           C  
ANISOU 1130  CB  ILE A 182     4843   6683   4370    695   -355   -111       C  
ATOM   1131  CG1 ILE A 182     -20.905  -2.575   5.165  1.00 44.60           C  
ANISOU 1131  CG1 ILE A 182     5142   7094   4711    756   -355   -167       C  
ATOM   1132  CG2 ILE A 182     -18.392  -2.798   5.480  1.00 34.46           C  
ANISOU 1132  CG2 ILE A 182     3913   5701   3478    638   -361    -72       C  
ATOM   1133  CD1 ILE A 182     -21.122  -3.951   4.594  1.00 50.00           C  
ANISOU 1133  CD1 ILE A 182     5729   7816   5452    705   -320   -189       C  
ATOM   1134  N   LYS A 183     -18.060  -4.608   8.232  1.00 53.74           N  
ANISOU 1134  N   LYS A 183     6303   8156   5959    562   -335     11       N  
ATOM   1135  CA  LYS A 183     -16.831  -4.799   8.971  1.00 43.61           C  
ANISOU 1135  CA  LYS A 183     5031   6855   4685    531   -371     75       C  
ATOM   1136  C   LYS A 183     -16.166  -6.075   8.441  1.00 46.81           C  
ANISOU 1136  C   LYS A 183     5375   7231   5181    525   -352    109       C  
ATOM   1137  O   LYS A 183     -16.837  -6.892   7.802  1.00 50.93           O  
ANISOU 1137  O   LYS A 183     5864   7742   5744    527   -298     82       O  
ATOM   1138  CB  LYS A 183     -17.119  -4.889  10.478  1.00 40.17           C  
ANISOU 1138  CB  LYS A 183     4636   6438   4186    517   -377    106       C  
ATOM   1139  CG  LYS A 183     -17.994  -6.071  10.898  1.00 46.00           C  
ANISOU 1139  CG  LYS A 183     5361   7179   4939    507   -316    117       C  
ATOM   1140  CD  LYS A 183     -18.191  -6.045  12.430  1.00 56.87           C  
ANISOU 1140  CD  LYS A 183     6804   8575   6230    482   -319    153       C  
ATOM   1141  CE  LYS A 183     -19.114  -7.145  12.906  1.00 62.72           C  
ANISOU 1141  CE  LYS A 183     7553   9311   6968    452   -238    162       C  
ATOM   1142  NZ  LYS A 183     -19.347  -7.077  14.375  1.00 60.47           N  
ANISOU 1142  NZ  LYS A 183     7349   9047   6581    418   -229    194       N  
ATOM   1143  N   PRO A 184     -14.843  -6.224   8.651  1.00 48.44           N  
ANISOU 1143  N   PRO A 184     5557   7428   5418    519   -394    157       N  
ATOM   1144  CA  PRO A 184     -14.047  -7.355   8.156  1.00 46.83           C  
ANISOU 1144  CA  PRO A 184     5291   7192   5311    536   -376    187       C  
ATOM   1145  C   PRO A 184     -14.581  -8.746   8.467  1.00 48.96           C  
ANISOU 1145  C   PRO A 184     5566   7415   5620    553   -325    221       C  
ATOM   1146  O   PRO A 184     -14.376  -9.664   7.681  1.00 54.87           O  
ANISOU 1146  O   PRO A 184     6281   8116   6451    565   -275    212       O  
ATOM   1147  CB  PRO A 184     -12.688  -7.143   8.860  1.00 47.02           C  
ANISOU 1147  CB  PRO A 184     5283   7246   5336    539   -451    237       C  
ATOM   1148  CG  PRO A 184     -12.565  -5.656   8.922  1.00 41.11           C  
ANISOU 1148  CG  PRO A 184     4572   6536   4514    492   -486    195       C  
ATOM   1149  CD  PRO A 184     -13.979  -5.173   9.226  1.00 44.47           C  
ANISOU 1149  CD  PRO A 184     5077   6955   4865    493   -458    166       C  
ATOM   1150  N   GLN A 185     -15.215  -8.925   9.612  1.00 49.53           N  
ANISOU 1150  N   GLN A 185     5695   7492   5631    546   -326    257       N  
ATOM   1151  CA  GLN A 185     -15.717 -10.249   9.959  1.00 51.30           C  
ANISOU 1151  CA  GLN A 185     5952   7655   5884    545   -262    294       C  
ATOM   1152  C   GLN A 185     -16.947 -10.642   9.163  1.00 52.03           C  
ANISOU 1152  C   GLN A 185     6033   7738   5997    502   -171    213       C  
ATOM   1153  O   GLN A 185     -17.336 -11.804   9.165  1.00 53.86           O  
ANISOU 1153  O   GLN A 185     6290   7907   6268    479    -96    221       O  
ATOM   1154  CB  GLN A 185     -16.069 -10.319  11.442  1.00 44.58           C  
ANISOU 1154  CB  GLN A 185     5180   6814   4942    532   -277    356       C  
ATOM   1155  CG  GLN A 185     -14.901 -10.167  12.369  1.00 59.69           C  
ANISOU 1155  CG  GLN A 185     7110   8749   6821    572   -376    444       C  
ATOM   1156  CD  GLN A 185     -14.832  -8.770  12.942  1.00 68.75           C  
ANISOU 1156  CD  GLN A 185     8269   9981   7873    544   -442    414       C  
ATOM   1157  OE1 GLN A 185     -14.681  -7.776  12.198  1.00 58.30           O  
ANISOU 1157  OE1 GLN A 185     6902   8688   6560    531   -457    345       O  
ATOM   1158  NE2 GLN A 185     -15.004  -8.672  14.269  1.00 72.15           N  
ANISOU 1158  NE2 GLN A 185     8777  10439   8197    526   -471    462       N  
ATOM   1159  N   ASN A 186     -17.590  -9.663   8.532  1.00 55.22           N  
ANISOU 1159  N   ASN A 186     6407   8208   6367    491   -178    133       N  
ATOM   1160  CA  ASN A 186     -18.794  -9.929   7.752  1.00 56.43           C  
ANISOU 1160  CA  ASN A 186     6526   8387   6528    456   -113     45       C  
ATOM   1161  C   ASN A 186     -18.468  -9.998   6.277  1.00 55.72           C  
ANISOU 1161  C   ASN A 186     6389   8291   6491    461   -106     -6       C  
ATOM   1162  O   ASN A 186     -19.367 -10.020   5.431  1.00 65.99           O  
ANISOU 1162  O   ASN A 186     7652   9638   7784    438    -77    -88       O  
ATOM   1163  CB  ASN A 186     -19.865  -8.865   8.024  1.00 52.00           C  
ANISOU 1163  CB  ASN A 186     5957   7913   5887    462   -128    -13       C  
ATOM   1164  CG  ASN A 186     -20.432  -8.965   9.444  1.00 53.10           C  
ANISOU 1164  CG  ASN A 186     6142   8066   5969    435   -100     13       C  
ATOM   1165  OD1 ASN A 186     -20.407 -10.035  10.049  1.00 56.56           O  
ANISOU 1165  OD1 ASN A 186     6618   8451   6422    394    -48     60       O  
ATOM   1166  ND2 ASN A 186     -20.946  -7.854   9.972  1.00 42.86           N  
ANISOU 1166  ND2 ASN A 186     4856   6829   4600    460   -126    -17       N  
ATOM   1167  N   LEU A 187     -17.172 -10.054   5.982  1.00 46.67           N  
ANISOU 1167  N   LEU A 187     5239   7101   5394    488   -134     38       N  
ATOM   1168  CA  LEU A 187     -16.698 -10.197   4.619  1.00 46.82           C  
ANISOU 1168  CA  LEU A 187     5221   7106   5461    484   -112     -8       C  
ATOM   1169  C   LEU A 187     -16.053 -11.568   4.433  1.00 50.69           C  
ANISOU 1169  C   LEU A 187     5703   7508   6048    486    -51     13       C  
ATOM   1170  O   LEU A 187     -14.927 -11.812   4.847  1.00 56.85           O  
ANISOU 1170  O   LEU A 187     6475   8248   6876    530    -74     77       O  
ATOM   1171  CB  LEU A 187     -15.745  -9.065   4.263  1.00 43.66           C  
ANISOU 1171  CB  LEU A 187     4819   6731   5040    504   -172      3       C  
ATOM   1172  CG  LEU A 187     -16.297  -7.651   4.457  1.00 43.26           C  
ANISOU 1172  CG  LEU A 187     4806   6736   4894    513   -225    -13       C  
ATOM   1173  CD1 LEU A 187     -15.217  -6.657   4.094  1.00 43.67           C  
ANISOU 1173  CD1 LEU A 187     4875   6787   4932    508   -262     -2       C  
ATOM   1174  CD2 LEU A 187     -17.558  -7.407   3.610  1.00 40.93           C  
ANISOU 1174  CD2 LEU A 187     4509   6489   4555    515   -211    -85       C  
ATOM   1175  N   LEU A 188     -16.813 -12.463   3.806  1.00 55.30           N  
ANISOU 1175  N   LEU A 188     6287   8066   6659    438     29    -50       N  
ATOM   1176  CA  LEU A 188     -16.395 -13.835   3.556  1.00 51.92           C  
ANISOU 1176  CA  LEU A 188     5874   7531   6323    434    112    -47       C  
ATOM   1177  C   LEU A 188     -15.494 -13.906   2.327  1.00 52.41           C  
ANISOU 1177  C   LEU A 188     5896   7575   6441    447    135    -92       C  
ATOM   1178  O   LEU A 188     -15.596 -13.076   1.435  1.00 48.26           O  
ANISOU 1178  O   LEU A 188     5345   7125   5867    425    111   -149       O  
ATOM   1179  CB  LEU A 188     -17.626 -14.736   3.423  1.00 50.67           C  
ANISOU 1179  CB  LEU A 188     5741   7349   6162    350    202   -114       C  
ATOM   1180  CG  LEU A 188     -18.538 -14.703   4.683  1.00 44.57           C  
ANISOU 1180  CG  LEU A 188     5006   6597   5331    321    201    -78       C  
ATOM   1181  CD1 LEU A 188     -19.748 -15.599   4.506  1.00 52.39           C  
ANISOU 1181  CD1 LEU A 188     6008   7577   6321    211    306   -161       C  
ATOM   1182  CD2 LEU A 188     -17.788 -15.075   5.954  1.00 38.81           C  
ANISOU 1182  CD2 LEU A 188     4347   5784   4617    380    181     50       C  
ATOM   1183  N   LEU A 189     -14.557 -14.846   2.339  1.00 55.11           N  
ANISOU 1183  N   LEU A 189     6241   7819   6881    494    182    -59       N  
ATOM   1184  CA  LEU A 189     -13.590 -15.015   1.258  1.00 56.29           C  
ANISOU 1184  CA  LEU A 189     6345   7947   7096    511    223   -107       C  
ATOM   1185  C   LEU A 189     -13.430 -16.475   0.903  1.00 58.35           C  
ANISOU 1185  C   LEU A 189     6638   8077   7456    519    336   -135       C  
ATOM   1186  O   LEU A 189     -13.311 -17.325   1.788  1.00 57.94           O  
ANISOU 1186  O   LEU A 189     6637   7924   7455    572    355    -62       O  
ATOM   1187  CB  LEU A 189     -12.208 -14.477   1.648  1.00 63.30           C  
ANISOU 1187  CB  LEU A 189     7172   8860   8020    591    156    -42       C  
ATOM   1188  CG  LEU A 189     -11.960 -12.993   1.861  1.00 65.75           C  
ANISOU 1188  CG  LEU A 189     7453   9281   8249    578     59    -24       C  
ATOM   1189  CD1 LEU A 189     -10.538 -12.764   2.348  1.00 66.05           C  
ANISOU 1189  CD1 LEU A 189     7417   9341   8340    642      7     29       C  
ATOM   1190  CD2 LEU A 189     -12.184 -12.286   0.557  1.00 63.36           C  
ANISOU 1190  CD2 LEU A 189     7149   9032   7894    510     86   -112       C  
ATOM   1191  N   ASP A 190     -13.382 -16.766  -0.389  1.00 60.70           N  
ANISOU 1191  N   ASP A 190     6923   8366   7776    470    415   -239       N  
ATOM   1192  CA  ASP A 190     -12.806 -18.027  -0.820  1.00 66.88           C  
ANISOU 1192  CA  ASP A 190     7726   9013   8671    502    529   -271       C  
ATOM   1193  C   ASP A 190     -11.369 -17.729  -1.271  1.00 67.84           C  
ANISOU 1193  C   ASP A 190     7763   9154   8860    581    524   -270       C  
ATOM   1194  O   ASP A 190     -11.159 -17.053  -2.272  1.00 68.21           O  
ANISOU 1194  O   ASP A 190     7769   9283   8864    527    533   -344       O  
ATOM   1195  CB  ASP A 190     -13.633 -18.663  -1.934  1.00 69.40           C  
ANISOU 1195  CB  ASP A 190     8088   9308   8974    386    637   -404       C  
ATOM   1196  CG  ASP A 190     -13.131 -20.044  -2.330  1.00 87.68           C  
ANISOU 1196  CG  ASP A 190    10451  11455  11407    411    775   -448       C  
ATOM   1197  OD1 ASP A 190     -12.067 -20.483  -1.836  1.00 95.58           O  
ANISOU 1197  OD1 ASP A 190    11441  12364  12512    541    783   -374       O  
ATOM   1198  OD2 ASP A 190     -13.799 -20.692  -3.164  1.00 97.41           O  
ANISOU 1198  OD2 ASP A 190    11731  12651  12628    303    876   -565       O  
ATOM   1199  N   PRO A 191     -10.373 -18.204  -0.505  1.00 69.89           N  
ANISOU 1199  N   PRO A 191     7993   9346   9215    709    507   -185       N  
ATOM   1200  CA  PRO A 191      -8.974 -17.844  -0.797  1.00 73.83           C  
ANISOU 1200  CA  PRO A 191     8376   9895   9781    786    491   -189       C  
ATOM   1201  C   PRO A 191      -8.488 -18.369  -2.173  1.00 67.50           C  
ANISOU 1201  C   PRO A 191     7547   9052   9047    764    627   -313       C  
ATOM   1202  O   PRO A 191      -7.620 -17.746  -2.828  1.00 62.53           O  
ANISOU 1202  O   PRO A 191     6823   8508   8427    755    637   -363       O  
ATOM   1203  CB  PRO A 191      -8.204 -18.486   0.363  1.00 69.74           C  
ANISOU 1203  CB  PRO A 191     7838   9309   9352    944    443    -73       C  
ATOM   1204  CG  PRO A 191      -9.103 -19.615   0.848  1.00 61.60           C  
ANISOU 1204  CG  PRO A 191     6951   8123   8333    947    502    -35       C  
ATOM   1205  CD  PRO A 191     -10.498 -19.107   0.656  1.00 61.88           C  
ANISOU 1205  CD  PRO A 191     7053   8214   8246    790    502    -83       C  
ATOM   1206  N   ASP A 192      -9.080 -19.482  -2.613  1.00 67.32           N  
ANISOU 1206  N   ASP A 192     7616   8901   9062    735    743   -372       N  
ATOM   1207  CA  ASP A 192      -8.733 -20.104  -3.888  1.00 71.01           C  
ANISOU 1207  CA  ASP A 192     8082   9313   9586    703    887   -502       C  
ATOM   1208  C   ASP A 192      -9.170 -19.239  -5.067  1.00 66.73           C  
ANISOU 1208  C   ASP A 192     7535   8896   8923    555    900   -606       C  
ATOM   1209  O   ASP A 192      -8.431 -19.065  -6.022  1.00 68.87           O  
ANISOU 1209  O   ASP A 192     7755   9203   9210    536    969   -688       O  
ATOM   1210  CB  ASP A 192      -9.384 -21.484  -4.009  1.00 81.66           C  
ANISOU 1210  CB  ASP A 192     9553  10484  10988    684   1010   -547       C  
ATOM   1211  CG  ASP A 192      -8.905 -22.457  -2.949  1.00 98.42           C  
ANISOU 1211  CG  ASP A 192    11716  12448  13231    845   1017   -438       C  
ATOM   1212  OD1 ASP A 192      -7.695 -22.454  -2.632  1.00104.28           O  
ANISOU 1212  OD1 ASP A 192    12362  13194  14067   1000    986   -384       O  
ATOM   1213  OD2 ASP A 192      -9.745 -23.216  -2.417  1.00105.20           O  
ANISOU 1213  OD2 ASP A 192    12705  13184  14084    815   1053   -406       O  
ATOM   1214  N   THR A 193     -10.382 -18.705  -5.002  1.00 62.03           N  
ANISOU 1214  N   THR A 193     6998   8370   8201    454    834   -604       N  
ATOM   1215  CA  THR A 193     -10.939 -17.968  -6.128  1.00 57.72           C  
ANISOU 1215  CA  THR A 193     6469   7937   7525    329    834   -694       C  
ATOM   1216  C   THR A 193     -10.924 -16.463  -5.923  1.00 59.39           C  
ANISOU 1216  C   THR A 193     6649   8287   7632    319    707   -632       C  
ATOM   1217  O   THR A 193     -11.179 -15.693  -6.853  1.00 59.30           O  
ANISOU 1217  O   THR A 193     6659   8365   7506    239    697   -685       O  
ATOM   1218  CB  THR A 193     -12.363 -18.382  -6.371  1.00 52.44           C  
ANISOU 1218  CB  THR A 193     5877   7269   6780    225    849   -755       C  
ATOM   1219  OG1 THR A 193     -13.142 -17.943  -5.253  1.00 61.42           O  
ANISOU 1219  OG1 THR A 193     7019   8444   7872    241    738   -662       O  
ATOM   1220  CG2 THR A 193     -12.450 -19.901  -6.492  1.00 46.09           C  
ANISOU 1220  CG2 THR A 193     5131   6305   6077    214    987   -820       C  
ATOM   1221  N   ALA A 194     -10.593 -16.059  -4.703  1.00 53.67           N  
ANISOU 1221  N   ALA A 194     5885   7569   6939    402    613   -518       N  
ATOM   1222  CA  ALA A 194     -10.584 -14.657  -4.305  1.00 52.05           C  
ANISOU 1222  CA  ALA A 194     5663   7471   6641    394    496   -456       C  
ATOM   1223  C   ALA A 194     -11.961 -14.014  -4.381  1.00 53.17           C  
ANISOU 1223  C   ALA A 194     5872   7682   6650    330    429   -462       C  
ATOM   1224  O   ALA A 194     -12.074 -12.788  -4.442  1.00 56.75           O  
ANISOU 1224  O   ALA A 194     6340   8216   7005    312    354   -437       O  
ATOM   1225  CB  ALA A 194      -9.559 -13.855  -5.164  1.00 49.35           C  
ANISOU 1225  CB  ALA A 194     5280   7192   6278    361    524   -496       C  
ATOM   1226  N   VAL A 195     -13.017 -14.820  -4.292  1.00 49.12           N  
ANISOU 1226  N   VAL A 195     5397   7134   6133    300    456   -494       N  
ATOM   1227  CA  VAL A 195     -14.358 -14.245  -4.283  1.00 46.83           C  
ANISOU 1227  CA  VAL A 195     5137   6930   5725    252    387   -507       C  
ATOM   1228  C   VAL A 195     -14.721 -13.778  -2.875  1.00 57.12           C  
ANISOU 1228  C   VAL A 195     6436   8247   7020    304    297   -409       C  
ATOM   1229  O   VAL A 195     -14.508 -14.485  -1.901  1.00 63.38           O  
ANISOU 1229  O   VAL A 195     7229   8962   7892    346    313   -352       O  
ATOM   1230  CB  VAL A 195     -15.411 -15.249  -4.792  1.00 49.54           C  
ANISOU 1230  CB  VAL A 195     5504   7260   6058    172    455   -604       C  
ATOM   1231  CG1 VAL A 195     -16.821 -14.739  -4.540  1.00 44.24           C  
ANISOU 1231  CG1 VAL A 195     4830   6695   5286    138    377   -617       C  
ATOM   1232  CG2 VAL A 195     -15.208 -15.522  -6.297  1.00 52.37           C  
ANISOU 1232  CG2 VAL A 195     5880   7634   6385    102    532   -717       C  
ATOM   1233  N   LEU A 196     -15.247 -12.566  -2.779  1.00 55.88           N  
ANISOU 1233  N   LEU A 196     6289   8183   6760    308    206   -388       N  
ATOM   1234  CA  LEU A 196     -15.722 -12.036  -1.519  1.00 52.90           C  
ANISOU 1234  CA  LEU A 196     5914   7828   6356    348    130   -316       C  
ATOM   1235  C   LEU A 196     -17.254 -12.073  -1.445  1.00 55.11           C  
ANISOU 1235  C   LEU A 196     6195   8175   6570    314    113   -363       C  
ATOM   1236  O   LEU A 196     -17.953 -11.726  -2.399  1.00 56.43           O  
ANISOU 1236  O   LEU A 196     6358   8422   6660    284     96   -433       O  
ATOM   1237  CB  LEU A 196     -15.220 -10.599  -1.322  1.00 52.24           C  
ANISOU 1237  CB  LEU A 196     5846   7792   6211    382     48   -264       C  
ATOM   1238  CG  LEU A 196     -15.699  -9.845  -0.070  1.00 48.96           C  
ANISOU 1238  CG  LEU A 196     5445   7405   5751    420    -30   -201       C  
ATOM   1239  CD1 LEU A 196     -14.626  -8.869   0.389  1.00 47.17           C  
ANISOU 1239  CD1 LEU A 196     5230   7176   5517    443    -80   -143       C  
ATOM   1240  CD2 LEU A 196     -17.043  -9.108  -0.305  1.00 34.92           C  
ANISOU 1240  CD2 LEU A 196     3689   5708   3872    424    -76   -240       C  
ATOM   1241  N   LYS A 197     -17.787 -12.456  -0.300  1.00 54.33           N  
ANISOU 1241  N   LYS A 197     6094   8056   6491    318    114   -327       N  
ATOM   1242  CA  LYS A 197     -19.228 -12.395  -0.140  1.00 52.15           C  
ANISOU 1242  CA  LYS A 197     5795   7864   6155    282    103   -382       C  
ATOM   1243  C   LYS A 197     -19.582 -11.676   1.141  1.00 54.80           C  
ANISOU 1243  C   LYS A 197     6138   8229   6456    328     46   -317       C  
ATOM   1244  O   LYS A 197     -19.101 -12.027   2.234  1.00 51.32           O  
ANISOU 1244  O   LYS A 197     5727   7717   6056    344     58   -240       O  
ATOM   1245  CB  LYS A 197     -19.828 -13.795  -0.138  1.00 52.63           C  
ANISOU 1245  CB  LYS A 197     5852   7878   6267    197    204   -443       C  
ATOM   1246  CG  LYS A 197     -19.938 -14.394  -1.517  1.00 52.97           C  
ANISOU 1246  CG  LYS A 197     5883   7932   6312    128    259   -549       C  
ATOM   1247  CD  LYS A 197     -20.258 -15.870  -1.442  1.00 54.57           C  
ANISOU 1247  CD  LYS A 197     6109   8042   6583     34    381   -604       C  
ATOM   1248  CE  LYS A 197     -20.012 -16.561  -2.789  1.00 54.11           C  
ANISOU 1248  CE  LYS A 197     6060   7958   6541    -32    454   -707       C  
ATOM   1249  NZ  LYS A 197     -20.852 -16.011  -3.889  1.00 62.17           N  
ANISOU 1249  NZ  LYS A 197     7027   9142   7454    -82    401   -813       N  
ATOM   1250  N   LEU A 198     -20.423 -10.660   1.000  1.00 55.42           N  
ANISOU 1250  N   LEU A 198     6193   8414   6451    356    -19   -348       N  
ATOM   1251  CA  LEU A 198     -20.981  -9.945   2.152  1.00 49.86           C  
ANISOU 1251  CA  LEU A 198     5491   7749   5705    397    -59   -314       C  
ATOM   1252  C   LEU A 198     -21.977 -10.804   2.928  1.00 47.48           C  
ANISOU 1252  C   LEU A 198     5157   7465   5418    334      7   -349       C  
ATOM   1253  O   LEU A 198     -22.844 -11.436   2.334  1.00 58.03           O  
ANISOU 1253  O   LEU A 198     6437   8857   6755    269     52   -442       O  
ATOM   1254  CB  LEU A 198     -21.650  -8.668   1.676  1.00 42.88           C  
ANISOU 1254  CB  LEU A 198     4593   6963   4735    463   -137   -348       C  
ATOM   1255  CG  LEU A 198     -22.287  -7.770   2.713  1.00 47.96           C  
ANISOU 1255  CG  LEU A 198     5240   7651   5332    521   -174   -332       C  
ATOM   1256  CD1 LEU A 198     -21.276  -7.434   3.827  1.00 43.31           C  
ANISOU 1256  CD1 LEU A 198     4723   6975   4757    533   -184   -238       C  
ATOM   1257  CD2 LEU A 198     -22.774  -6.522   1.966  1.00 47.18           C  
ANISOU 1257  CD2 LEU A 198     5148   7622   5156    611   -252   -359       C  
ATOM   1258  N   CYS A 199     -21.839 -10.866   4.243  1.00 53.99           N  
ANISOU 1258  N   CYS A 199     6022   8245   6246    338     20   -282       N  
ATOM   1259  CA  CYS A 199     -22.823 -11.596   5.063  1.00 54.96           C  
ANISOU 1259  CA  CYS A 199     6131   8384   6366    265     97   -313       C  
ATOM   1260  C   CYS A 199     -23.313 -10.810   6.285  1.00 54.49           C  
ANISOU 1260  C   CYS A 199     6082   8375   6245    296     76   -288       C  
ATOM   1261  O   CYS A 199     -23.026  -9.613   6.459  1.00 47.75           O  
ANISOU 1261  O   CYS A 199     5245   7550   5350    379     -3   -260       O  
ATOM   1262  CB  CYS A 199     -22.256 -12.957   5.527  1.00 58.76           C  
ANISOU 1262  CB  CYS A 199     6685   8730   6912    205    182   -257       C  
ATOM   1263  SG  CYS A 199     -21.104 -12.949   6.970  1.00 62.63           S  
ANISOU 1263  SG  CYS A 199     7281   9115   7400    264    150   -100       S  
ATOM   1264  N   ASP A 200     -24.069 -11.517   7.121  1.00 54.37           N  
ANISOU 1264  N   ASP A 200     6072   8364   6224    216    162   -307       N  
ATOM   1265  CA  ASP A 200     -24.687 -10.976   8.322  1.00 58.49           C  
ANISOU 1265  CA  ASP A 200     6603   8937   6683    219    175   -303       C  
ATOM   1266  C   ASP A 200     -25.623  -9.821   8.002  1.00 56.27           C  
ANISOU 1266  C   ASP A 200     6225   8798   6358    285    127   -394       C  
ATOM   1267  O   ASP A 200     -25.288  -8.649   8.183  1.00 53.29           O  
ANISOU 1267  O   ASP A 200     5874   8430   5942    382     50   -362       O  
ATOM   1268  CB  ASP A 200     -23.649 -10.513   9.351  1.00 62.28           C  
ANISOU 1268  CB  ASP A 200     7190   9342   7131    272    123   -182       C  
ATOM   1269  CG  ASP A 200     -24.281 -10.240  10.713  1.00 78.53           C  
ANISOU 1269  CG  ASP A 200     9284  11438   9115    244    165   -179       C  
ATOM   1270  OD1 ASP A 200     -25.462 -10.604  10.873  1.00 81.45           O  
ANISOU 1270  OD1 ASP A 200     9597  11877   9474    172    254   -264       O  
ATOM   1271  OD2 ASP A 200     -23.616  -9.690  11.625  1.00 91.26           O  
ANISOU 1271  OD2 ASP A 200    10978  13022  10676    282    117   -101       O  
ATOM   1272  N   PHE A 201     -26.826 -10.164   7.578  1.00 55.92           N  
ANISOU 1272  N   PHE A 201     6066   8863   6317    231    178   -511       N  
ATOM   1273  CA  PHE A 201     -27.826  -9.141   7.341  1.00 59.29           C  
ANISOU 1273  CA  PHE A 201     6383   9440   6706    313    133   -602       C  
ATOM   1274  C   PHE A 201     -28.735  -8.985   8.569  1.00 53.17           C  
ANISOU 1274  C   PHE A 201     5576   8733   5894    281    210   -647       C  
ATOM   1275  O   PHE A 201     -29.838  -8.467   8.475  1.00 47.12           O  
ANISOU 1275  O   PHE A 201     4681   8112   5109    323    210   -753       O  
ATOM   1276  CB  PHE A 201     -28.588  -9.470   6.060  1.00 55.42           C  
ANISOU 1276  CB  PHE A 201     5760   9066   6232    291    119   -714       C  
ATOM   1277  CG  PHE A 201     -27.746  -9.276   4.838  1.00 55.60           C  
ANISOU 1277  CG  PHE A 201     5822   9040   6264    348     33   -676       C  
ATOM   1278  CD1 PHE A 201     -26.731 -10.175   4.540  1.00 44.27           C  
ANISOU 1278  CD1 PHE A 201     4473   7472   4877    277     67   -615       C  
ATOM   1279  CD2 PHE A 201     -27.914  -8.163   4.031  1.00 55.32           C  
ANISOU 1279  CD2 PHE A 201     5754   9079   6184    480    -76   -692       C  
ATOM   1280  CE1 PHE A 201     -25.939  -9.995   3.471  1.00 40.60           C  
ANISOU 1280  CE1 PHE A 201     4043   6967   4418    319      6   -588       C  
ATOM   1281  CE2 PHE A 201     -27.100  -7.963   2.946  1.00 44.98           C  
ANISOU 1281  CE2 PHE A 201     4503   7718   4869    518   -141   -651       C  
ATOM   1282  CZ  PHE A 201     -26.116  -8.884   2.659  1.00 48.32           C  
ANISOU 1282  CZ  PHE A 201     4994   8024   5341    429    -95   -606       C  
ATOM   1283  N   GLY A 202     -28.209  -9.394   9.730  1.00 54.82           N  
ANISOU 1283  N   GLY A 202     5905   8838   6085    218    269   -561       N  
ATOM   1284  CA  GLY A 202     -28.889  -9.240  11.014  1.00 54.43           C  
ANISOU 1284  CA  GLY A 202     5864   8833   5983    177    352   -587       C  
ATOM   1285  C   GLY A 202     -29.276  -7.812  11.354  1.00 40.92           C  
ANISOU 1285  C   GLY A 202     4119   7201   4227    307    300   -626       C  
ATOM   1286  O   GLY A 202     -30.309  -7.587  11.953  1.00 54.07           O  
ANISOU 1286  O   GLY A 202     5708   8972   5865    292    373   -717       O  
ATOM   1287  N   SER A 203     -28.456  -6.852  10.946  1.00 44.58           N  
ANISOU 1287  N   SER A 203     4644   7611   4685    430    185   -565       N  
ATOM   1288  CA  SER A 203     -28.695  -5.425  11.176  1.00 47.39           C  
ANISOU 1288  CA  SER A 203     5003   8003   4999    565    133   -593       C  
ATOM   1289  C   SER A 203     -29.306  -4.688   9.965  1.00 58.02           C  
ANISOU 1289  C   SER A 203     6240   9440   6366    699     55   -667       C  
ATOM   1290  O   SER A 203     -29.590  -3.485  10.036  1.00 59.45           O  
ANISOU 1290  O   SER A 203     6430   9641   6519    834     13   -693       O  
ATOM   1291  CB  SER A 203     -27.366  -4.745  11.535  1.00 55.87           C  
ANISOU 1291  CB  SER A 203     6237   8948   6043    606     61   -481       C  
ATOM   1292  OG  SER A 203     -26.670  -5.451  12.568  1.00 68.90           O  
ANISOU 1292  OG  SER A 203     7990  10522   7666    500    102   -397       O  
ATOM   1293  N   ALA A 204     -29.475  -5.392   8.846  1.00 52.51           N  
ANISOU 1293  N   ALA A 204     5455   8786   5709    666     34   -696       N  
ATOM   1294  CA  ALA A 204     -29.825  -4.716   7.613  1.00 52.97           C  
ANISOU 1294  CA  ALA A 204     5443   8917   5766    795    -64   -738       C  
ATOM   1295  C   ALA A 204     -31.240  -4.195   7.663  1.00 55.59           C  
ANISOU 1295  C   ALA A 204     5616   9418   6086    889    -58   -862       C  
ATOM   1296  O   ALA A 204     -32.149  -4.842   8.210  1.00 49.99           O  
ANISOU 1296  O   ALA A 204     4785   8818   5392    797     38   -955       O  
ATOM   1297  CB  ALA A 204     -29.619  -5.644   6.384  1.00 46.90           C  
ANISOU 1297  CB  ALA A 204     4627   8162   5030    723    -89   -746       C  
ATOM   1298  N   LYS A 205     -31.441  -3.029   7.062  1.00 59.58           N  
ANISOU 1298  N   LYS A 205     6123   9949   6566   1074   -156   -867       N  
ATOM   1299  CA  LYS A 205     -32.773  -2.447   7.038  1.00 56.80           C  
ANISOU 1299  CA  LYS A 205     5610   9765   6208   1207   -168   -983       C  
ATOM   1300  C   LYS A 205     -33.025  -1.694   5.736  1.00 55.18           C  
ANISOU 1300  C   LYS A 205     5374   9616   5977   1389   -306   -985       C  
ATOM   1301  O   LYS A 205     -32.135  -1.070   5.171  1.00 52.75           O  
ANISOU 1301  O   LYS A 205     5229   9174   5639   1459   -383   -883       O  
ATOM   1302  CB  LYS A 205     -32.970  -1.505   8.226  1.00 48.69           C  
ANISOU 1302  CB  LYS A 205     4642   8697   5162   1293   -116   -994       C  
ATOM   1303  CG  LYS A 205     -34.257  -0.700   8.173  1.00 57.56           C  
ANISOU 1303  CG  LYS A 205     5610   9976   6286   1481   -135  -1110       C  
ATOM   1304  CD  LYS A 205     -34.678  -0.220   9.551  1.00 58.33           C  
ANISOU 1304  CD  LYS A 205     5717  10071   6376   1497    -24  -1165       C  
ATOM   1305  CE  LYS A 205     -35.833   0.727   9.463  1.00 58.63           C  
ANISOU 1305  CE  LYS A 205     5616  10240   6422   1723    -48  -1274       C  
ATOM   1306  NZ  LYS A 205     -35.981   1.490  10.713  1.00 69.87           N  
ANISOU 1306  NZ  LYS A 205     7115  11605   7829   1774     50  -1308       N  
ATOM   1307  N   GLN A 206     -34.265  -1.745   5.290  1.00 59.58           N  
ANISOU 1307  N   GLN A 206     5719  10380   6538   1464   -336  -1105       N  
ATOM   1308  CA  GLN A 206     -34.724  -0.928   4.187  1.00 63.54           C  
ANISOU 1308  CA  GLN A 206     6176  10966   7000   1677   -478  -1115       C  
ATOM   1309  C   GLN A 206     -34.912   0.504   4.655  1.00 63.97           C  
ANISOU 1309  C   GLN A 206     6315  10955   7035   1907   -507  -1092       C  
ATOM   1310  O   GLN A 206     -35.853   0.796   5.387  1.00 67.45           O  
ANISOU 1310  O   GLN A 206     6623  11504   7499   1984   -454  -1192       O  
ATOM   1311  CB  GLN A 206     -36.039  -1.490   3.662  1.00 68.79           C  
ANISOU 1311  CB  GLN A 206     6558  11904   7676   1680   -504  -1265       C  
ATOM   1312  CG  GLN A 206     -36.741  -0.601   2.682  1.00 81.18           C  
ANISOU 1312  CG  GLN A 206     8045  13603   9197   1935   -661  -1290       C  
ATOM   1313  CD  GLN A 206     -36.728  -1.188   1.312  1.00 82.00           C  
ANISOU 1313  CD  GLN A 206     8094  13808   9256   1887   -766  -1297       C  
ATOM   1314  OE1 GLN A 206     -36.146  -2.254   1.090  1.00 75.12           O  
ANISOU 1314  OE1 GLN A 206     7255  12890   8397   1660   -709  -1287       O  
ATOM   1315  NE2 GLN A 206     -37.382  -0.513   0.377  1.00 88.50           N  
ANISOU 1315  NE2 GLN A 206     8837  14769  10018   2106   -919  -1316       N  
ATOM   1316  N   LEU A 207     -34.022   1.399   4.241  1.00 62.81           N  
ANISOU 1316  N   LEU A 207     6394  10625   6844   2009   -577   -970       N  
ATOM   1317  CA  LEU A 207     -34.112   2.800   4.660  1.00 56.84           C  
ANISOU 1317  CA  LEU A 207     5763   9767   6067   2221   -593   -943       C  
ATOM   1318  C   LEU A 207     -35.109   3.613   3.841  1.00 65.87           C  
ANISOU 1318  C   LEU A 207     6817  11031   7179   2498   -713   -983       C  
ATOM   1319  O   LEU A 207     -35.035   3.681   2.606  1.00 71.99           O  
ANISOU 1319  O   LEU A 207     7615  11835   7902   2570   -835   -934       O  
ATOM   1320  CB  LEU A 207     -32.747   3.463   4.600  1.00 46.76           C  
ANISOU 1320  CB  LEU A 207     4779   8235   4753   2200   -603   -804       C  
ATOM   1321  CG  LEU A 207     -31.706   2.945   5.595  1.00 49.44           C  
ANISOU 1321  CG  LEU A 207     5225   8444   5117   1975   -497   -760       C  
ATOM   1322  CD1 LEU A 207     -30.485   3.852   5.593  1.00 44.24           C  
ANISOU 1322  CD1 LEU A 207     4834   7556   4419   1983   -511   -648       C  
ATOM   1323  CD2 LEU A 207     -32.315   2.871   7.000  1.00 50.68           C  
ANISOU 1323  CD2 LEU A 207     5299   8653   5304   1943   -384   -846       C  
ATOM   1324  N   VAL A 208     -36.031   4.236   4.567  1.00 68.55           N  
ANISOU 1324  N   VAL A 208     7059  11441   7547   2657   -676  -1071       N  
ATOM   1325  CA  VAL A 208     -37.052   5.115   4.032  1.00 62.45           C  
ANISOU 1325  CA  VAL A 208     6191  10780   6757   2962   -781  -1116       C  
ATOM   1326  C   VAL A 208     -36.855   6.550   4.527  1.00 70.85           C  
ANISOU 1326  C   VAL A 208     7477  11636   7805   3174   -764  -1063       C  
ATOM   1327  O   VAL A 208     -36.865   6.810   5.741  1.00 74.00           O  
ANISOU 1327  O   VAL A 208     7910  11965   8242   3138   -636  -1112       O  
ATOM   1328  CB  VAL A 208     -38.452   4.630   4.453  1.00 68.89           C  
ANISOU 1328  CB  VAL A 208     6663  11882   7631   2994   -741  -1295       C  
ATOM   1329  CG1 VAL A 208     -39.531   5.553   3.896  1.00 64.27           C  
ANISOU 1329  CG1 VAL A 208     5952  11435   7033   3342   -863  -1347       C  
ATOM   1330  CG2 VAL A 208     -38.667   3.201   3.991  1.00 70.73           C  
ANISOU 1330  CG2 VAL A 208     6689  12308   7876   2759   -740  -1362       C  
ATOM   1331  N   ARG A 209     -36.733   7.482   3.588  1.00 74.66           N  
ANISOU 1331  N   ARG A 209     8119  12022   8226   3396   -889   -970       N  
ATOM   1332  CA  ARG A 209     -36.555   8.894   3.917  1.00 78.40           C  
ANISOU 1332  CA  ARG A 209     8837  12272   8679   3610   -875   -915       C  
ATOM   1333  C   ARG A 209     -37.638   9.394   4.876  1.00 78.76           C  
ANISOU 1333  C   ARG A 209     8731  12406   8787   3792   -801  -1049       C  
ATOM   1334  O   ARG A 209     -38.828   9.268   4.596  1.00 73.80           O  
ANISOU 1334  O   ARG A 209     7832  12021   8186   3963   -864  -1150       O  
ATOM   1335  CB  ARG A 209     -36.572   9.740   2.632  1.00 79.52           C  
ANISOU 1335  CB  ARG A 209     9134  12344   8737   3861  -1033   -806       C  
ATOM   1336  N   GLY A 210     -37.234   9.918   6.032  1.00 80.01           N  
ANISOU 1336  N   GLY A 210     9047  12386   8967   3740   -663  -1063       N  
ATOM   1337  CA  GLY A 210     -38.206  10.507   6.935  1.00 70.79           C  
ANISOU 1337  CA  GLY A 210     7769  11275   7852   3923   -578  -1193       C  
ATOM   1338  C   GLY A 210     -38.718   9.533   7.970  1.00 72.10           C  
ANISOU 1338  C   GLY A 210     7680  11636   8077   3721   -444  -1336       C  
ATOM   1339  O   GLY A 210     -39.434   9.916   8.897  1.00 79.31           O  
ANISOU 1339  O   GLY A 210     8505  12598   9033   3815   -336  -1457       O  
ATOM   1340  N   GLU A 211     -38.399   8.257   7.782  1.00 71.86           N  
ANISOU 1340  N   GLU A 211     7534  11720   8047   3446   -444  -1326       N  
ATOM   1341  CA  GLU A 211     -38.665   7.272   8.808  1.00 72.27           C  
ANISOU 1341  CA  GLU A 211     7416  11905   8140   3205   -299  -1433       C  
ATOM   1342  C   GLU A 211     -37.355   7.081   9.558  1.00 71.50           C  
ANISOU 1342  C   GLU A 211     7574  11586   8008   2952   -212  -1338       C  
ATOM   1343  O   GLU A 211     -36.350   6.685   8.977  1.00 78.48           O  
ANISOU 1343  O   GLU A 211     8592  12367   8861   2813   -275  -1217       O  
ATOM   1344  CB  GLU A 211     -39.188   5.964   8.202  1.00 72.58           C  
ANISOU 1344  CB  GLU A 211     7175  12201   8202   3059   -339  -1492       C  
ATOM   1345  CG  GLU A 211     -40.636   6.040   7.694  1.00 76.34           C  
ANISOU 1345  CG  GLU A 211     7330  12961   8716   3277   -406  -1630       C  
ATOM   1346  CD  GLU A 211     -41.084   4.774   6.968  1.00 80.15           C  
ANISOU 1346  CD  GLU A 211     7552  13693   9208   3113   -457  -1692       C  
ATOM   1347  N   PRO A 212     -37.367   7.351  10.868  1.00 67.24           N  
ANISOU 1347  N   PRO A 212     7094  10985   7470   2891    -67  -1401       N  
ATOM   1348  CA  PRO A 212     -36.114   7.280  11.632  1.00 64.65           C  
ANISOU 1348  CA  PRO A 212     7012  10455   7095   2670      0  -1314       C  
ATOM   1349  C   PRO A 212     -35.648   5.856  11.922  1.00 68.52           C  
ANISOU 1349  C   PRO A 212     7434  11016   7582   2365     44  -1287       C  
ATOM   1350  O   PRO A 212     -36.452   4.926  11.949  1.00 75.26           O  
ANISOU 1350  O   PRO A 212     8050  12074   8471   2288     85  -1374       O  
ATOM   1351  CB  PRO A 212     -36.455   8.023  12.925  1.00 64.05           C  
ANISOU 1351  CB  PRO A 212     7001  10326   7010   2719    140  -1410       C  
ATOM   1352  CG  PRO A 212     -37.958   7.906  13.055  1.00 57.03           C  
ANISOU 1352  CG  PRO A 212     5816   9676   6178   2862    191  -1572       C  
ATOM   1353  CD  PRO A 212     -38.472   7.950  11.639  1.00 57.96           C  
ANISOU 1353  CD  PRO A 212     5791   9902   6327   3061     31  -1551       C  
ATOM   1354  N   ASN A 213     -34.339   5.705  12.112  1.00 63.73           N  
ANISOU 1354  N   ASN A 213     7039  10239   6935   2196     35  -1169       N  
ATOM   1355  CA  ASN A 213     -33.714   4.411  12.354  1.00 58.84           C  
ANISOU 1355  CA  ASN A 213     6399   9645   6311   1931     64  -1117       C  
ATOM   1356  C   ASN A 213     -32.790   4.513  13.530  1.00 62.77           C  
ANISOU 1356  C   ASN A 213     7089  10006   6753   1777    138  -1072       C  
ATOM   1357  O   ASN A 213     -32.262   5.593  13.806  1.00 60.40           O  
ANISOU 1357  O   ASN A 213     6980   9553   6417   1848    131  -1046       O  
ATOM   1358  CB  ASN A 213     -32.912   3.948  11.140  1.00 64.98           C  
ANISOU 1358  CB  ASN A 213     7217  10377   7098   1884    -55  -1004       C  
ATOM   1359  CG  ASN A 213     -33.538   4.374   9.842  1.00 62.35           C  
ANISOU 1359  CG  ASN A 213     6793  10113   6782   2090   -167  -1017       C  
ATOM   1360  OD1 ASN A 213     -34.528   3.786   9.394  1.00 64.93           O  
ANISOU 1360  OD1 ASN A 213     7280  10307   7083   2227   -248   -946       O  
ATOM   1361  ND2 ASN A 213     -32.970   5.405   9.230  1.00 50.61           N  
ANISOU 1361  ND2 ASN A 213     5056   8841   5334   2107   -172  -1109       N  
ATOM   1362  N   VAL A 214     -32.579   3.394  14.214  1.00 61.70           N  
ANISOU 1362  N   VAL A 214     6917   9921   6605   1562    207  -1061       N  
ATOM   1363  CA  VAL A 214     -31.752   3.414  15.404  1.00 56.77           C  
ANISOU 1363  CA  VAL A 214     6464   9194   5910   1415    267  -1018       C  
ATOM   1364  C   VAL A 214     -30.339   3.816  14.999  1.00 52.51           C  
ANISOU 1364  C   VAL A 214     6117   8486   5349   1387    167   -893       C  
ATOM   1365  O   VAL A 214     -29.848   3.408  13.954  1.00 53.52           O  
ANISOU 1365  O   VAL A 214     6224   8597   5514   1379     78   -818       O  
ATOM   1366  CB  VAL A 214     -31.746   2.040  16.130  1.00 54.12           C  
ANISOU 1366  CB  VAL A 214     6072   8937   5556   1198    347  -1005       C  
ATOM   1367  CG1 VAL A 214     -33.112   1.736  16.659  1.00 48.90           C  
ANISOU 1367  CG1 VAL A 214     5237   8437   4905   1197    474  -1143       C  
ATOM   1368  CG2 VAL A 214     -31.298   0.908  15.194  1.00 47.01           C  
ANISOU 1368  CG2 VAL A 214     5108   8050   4705   1108    278   -922       C  
ATOM   1369  N   SER A 215     -29.700   4.649  15.811  1.00 56.07           N  
ANISOU 1369  N   SER A 215     6750   8819   5735   1364    189   -884       N  
ATOM   1370  CA  SER A 215     -28.356   5.125  15.499  1.00 56.70           C  
ANISOU 1370  CA  SER A 215     7005   8749   5790   1320    107   -786       C  
ATOM   1371  C   SER A 215     -27.304   4.140  15.965  1.00 60.24           C  
ANISOU 1371  C   SER A 215     7485   9195   6209   1118     86   -696       C  
ATOM   1372  O   SER A 215     -26.172   4.168  15.497  1.00 68.36           O  
ANISOU 1372  O   SER A 215     8593  10142   7239   1063      8   -610       O  
ATOM   1373  CB  SER A 215     -28.090   6.483  16.139  1.00 56.13           C  
ANISOU 1373  CB  SER A 215     7119   8549   5657   1368    140   -828       C  
ATOM   1374  OG  SER A 215     -28.040   6.349  17.543  1.00 75.72           O  
ANISOU 1374  OG  SER A 215     9651  11057   8063   1245    224   -870       O  
ATOM   1375  N   TYR A 216     -27.677   3.269  16.890  1.00 59.35           N  
ANISOU 1375  N   TYR A 216     7313   9173   6066   1011    160   -716       N  
ATOM   1376  CA  TYR A 216     -26.690   2.463  17.598  1.00 57.32           C  
ANISOU 1376  CA  TYR A 216     7121   8901   5756    839    144   -628       C  
ATOM   1377  C   TYR A 216     -26.258   1.208  16.857  1.00 61.78           C  
ANISOU 1377  C   TYR A 216     7600   9488   6384    775     91   -538       C  
ATOM   1378  O   TYR A 216     -25.691   0.300  17.479  1.00 63.01           O  
ANISOU 1378  O   TYR A 216     7785   9650   6505    652     93   -467       O  
ATOM   1379  CB  TYR A 216     -27.217   2.062  18.976  1.00 54.58           C  
ANISOU 1379  CB  TYR A 216     6787   8623   5326    744    251   -673       C  
ATOM   1380  CG  TYR A 216     -28.558   1.371  18.996  1.00 55.17           C  
ANISOU 1380  CG  TYR A 216     6705   8819   5438    754    354   -751       C  
ATOM   1381  CD1 TYR A 216     -28.724   0.095  18.443  1.00 50.83           C  
ANISOU 1381  CD1 TYR A 216     6042   8323   4948    690    352   -707       C  
ATOM   1382  CD2 TYR A 216     -29.657   1.974  19.605  1.00 56.90           C  
ANISOU 1382  CD2 TYR A 216     6888   9101   5632    814    465   -881       C  
ATOM   1383  CE1 TYR A 216     -29.962  -0.545  18.470  1.00 50.99           C  
ANISOU 1383  CE1 TYR A 216     5912   8463   4998    670    457   -795       C  
ATOM   1384  CE2 TYR A 216     -30.898   1.337  19.645  1.00 61.73           C  
ANISOU 1384  CE2 TYR A 216     7331   9845   6278    807    569   -970       C  
ATOM   1385  CZ  TYR A 216     -31.045   0.079  19.074  1.00 59.73           C  
ANISOU 1385  CZ  TYR A 216     6965   9650   6081    725    563   -928       C  
ATOM   1386  OH  TYR A 216     -32.274  -0.550  19.119  1.00 60.51           O  
ANISOU 1386  OH  TYR A 216     6892   9887   6211    691    676  -1031       O  
ATOM   1387  N   ILE A 217     -26.541   1.132  15.553  1.00 59.25           N  
ANISOU 1387  N   ILE A 217     7185   9180   6149    863     47   -541       N  
ATOM   1388  CA  ILE A 217     -26.028   0.014  14.765  1.00 54.53           C  
ANISOU 1388  CA  ILE A 217     6524   8585   5610    801      0   -464       C  
ATOM   1389  C   ILE A 217     -24.566   0.246  14.409  1.00 53.24           C  
ANISOU 1389  C   ILE A 217     6459   8322   5446    769    -91   -371       C  
ATOM   1390  O   ILE A 217     -23.992   1.305  14.717  1.00 49.48           O  
ANISOU 1390  O   ILE A 217     6098   7778   4923    784   -118   -372       O  
ATOM   1391  CB  ILE A 217     -26.844  -0.240  13.439  1.00 57.84           C  
ANISOU 1391  CB  ILE A 217     6800   9070   6108    889    -17   -509       C  
ATOM   1392  CG1 ILE A 217     -27.366   1.060  12.825  1.00 52.97           C  
ANISOU 1392  CG1 ILE A 217     6192   8443   5493   1057    -51   -567       C  
ATOM   1393  CG2 ILE A 217     -28.004  -1.188  13.685  1.00 53.97           C  
ANISOU 1393  CG2 ILE A 217     6168   8700   5638    841     72   -580       C  
ATOM   1394  CD1 ILE A 217     -26.342   1.872  12.082  1.00 47.19           C  
ANISOU 1394  CD1 ILE A 217     5583   7591   4756   1102   -137   -501       C  
ATOM   1395  N   CYS A 218     -23.971  -0.767  13.779  1.00 60.81           N  
ANISOU 1395  N   CYS A 218     7370   9276   6460    715   -126   -303       N  
ATOM   1396  CA  CYS A 218     -22.616  -0.689  13.217  1.00 59.01           C  
ANISOU 1396  CA  CYS A 218     7193   8974   6254    689   -205   -226       C  
ATOM   1397  C   CYS A 218     -21.566  -0.806  14.324  1.00 56.91           C  
ANISOU 1397  C   CYS A 218     7010   8684   5930    597   -230   -165       C  
ATOM   1398  O   CYS A 218     -21.776  -0.372  15.442  1.00 62.98           O  
ANISOU 1398  O   CYS A 218     7844   9465   6619    572   -202   -190       O  
ATOM   1399  CB  CYS A 218     -22.443   0.605  12.399  1.00 57.58           C  
ANISOU 1399  CB  CYS A 218     7073   8735   6071    773   -246   -252       C  
ATOM   1400  SG  CYS A 218     -21.132   0.583  11.189  1.00 75.41           S  
ANISOU 1400  SG  CYS A 218     9348  10927   8376    746   -315   -186       S  
ATOM   1401  N   SER A 219     -20.424  -1.377  13.983  1.00 58.76           N  
ANISOU 1401  N   SER A 219     7234   8890   6201    553   -287    -89       N  
ATOM   1402  CA  SER A 219     -19.451  -1.834  14.957  1.00 58.06           C  
ANISOU 1402  CA  SER A 219     7186   8807   6069    479   -326    -18       C  
ATOM   1403  C   SER A 219     -18.285  -0.880  15.120  1.00 63.60           C  
ANISOU 1403  C   SER A 219     7948   9483   6732    445   -397    -12       C  
ATOM   1404  O   SER A 219     -17.943  -0.164  14.165  1.00 61.82           O  
ANISOU 1404  O   SER A 219     7727   9217   6546    467   -414    -37       O  
ATOM   1405  CB  SER A 219     -18.937  -3.223  14.555  1.00 53.79           C  
ANISOU 1405  CB  SER A 219     6578   8258   5602    463   -341     59       C  
ATOM   1406  OG  SER A 219     -19.959  -4.199  14.726  1.00 54.82           O  
ANISOU 1406  OG  SER A 219     6677   8406   5745    455   -263     53       O  
ATOM   1407  N   ARG A 220     -17.698  -0.886  16.332  1.00 58.34           N  
ANISOU 1407  N   ARG A 220     7337   8850   5981    382   -433     19       N  
ATOM   1408  CA  ARG A 220     -16.474  -0.143  16.671  1.00 58.80           C  
ANISOU 1408  CA  ARG A 220     7436   8913   5991    319   -509     21       C  
ATOM   1409  C   ARG A 220     -15.455  -0.080  15.545  1.00 60.28           C  
ANISOU 1409  C   ARG A 220     7560   9077   6268    316   -555     38       C  
ATOM   1410  O   ARG A 220     -15.067  -1.143  15.060  1.00 61.63           O  
ANISOU 1410  O   ARG A 220     7642   9258   6515    339   -575     99       O  
ATOM   1411  CB  ARG A 220     -15.745  -0.824  17.821  1.00 70.59           C  
ANISOU 1411  CB  ARG A 220     8935  10472   7413    266   -575     92       C  
ATOM   1412  CG  ARG A 220     -16.131  -0.532  19.229  1.00 87.70           C  
ANISOU 1412  CG  ARG A 220    11202  12681   9440    217   -563     73       C  
ATOM   1413  CD  ARG A 220     -14.976  -1.040  20.123  1.00 92.97           C  
ANISOU 1413  CD  ARG A 220    11868  13423  10034    166   -674    153       C  
ATOM   1414  NE  ARG A 220     -14.290  -2.189  19.513  1.00 93.44           N  
ANISOU 1414  NE  ARG A 220    11825  13484  10195    218   -728    248       N  
ATOM   1415  CZ  ARG A 220     -13.141  -2.712  19.948  1.00 91.83           C  
ANISOU 1415  CZ  ARG A 220    11578  13343   9969    214   -840    325       C  
ATOM   1416  NH1 ARG A 220     -12.606  -3.756  19.324  1.00 85.17           N  
ANISOU 1416  NH1 ARG A 220    10642  12484   9234    283   -871    403       N  
ATOM   1417  NH2 ARG A 220     -12.523  -2.203  21.011  1.00 85.35           N  
ANISOU 1417  NH2 ARG A 220    10804  12608   9017    147   -924    319       N  
ATOM   1418  N   TYR A 221     -14.940   1.125  15.257  1.00 58.18           N  
ANISOU 1418  N   TYR A 221     7348   8776   5980    273   -565    -18       N  
ATOM   1419  CA  TYR A 221     -13.963   1.445  14.181  1.00 55.69           C  
ANISOU 1419  CA  TYR A 221     6995   8433   5731    243   -586    -22       C  
ATOM   1420  C   TYR A 221     -14.600   1.807  12.845  1.00 53.27           C  
ANISOU 1420  C   TYR A 221     6708   8050   5483    309   -529    -48       C  
ATOM   1421  O   TYR A 221     -14.055   2.623  12.104  1.00 47.96           O  
ANISOU 1421  O   TYR A 221     6081   7324   4818    272   -520    -76       O  
ATOM   1422  CB  TYR A 221     -12.973   0.292  13.893  1.00 53.11           C  
ANISOU 1422  CB  TYR A 221     6537   8163   5481    239   -641     47       C  
ATOM   1423  CG  TYR A 221     -12.227  -0.262  15.089  1.00 56.95           C  
ANISOU 1423  CG  TYR A 221     6985   8738   5916    202   -722     96       C  
ATOM   1424  CD1 TYR A 221     -12.050   0.491  16.247  1.00 63.43           C  
ANISOU 1424  CD1 TYR A 221     7883   9601   6617    128   -758     62       C  
ATOM   1425  CD2 TYR A 221     -11.734  -1.559  15.074  1.00 52.33           C  
ANISOU 1425  CD2 TYR A 221     6298   8192   5393    250   -765    177       C  
ATOM   1426  CE1 TYR A 221     -11.399  -0.027  17.335  1.00 60.18           C  
ANISOU 1426  CE1 TYR A 221     7442   9286   6139    102   -847    112       C  
ATOM   1427  CE2 TYR A 221     -11.078  -2.089  16.168  1.00 46.07           C  
ANISOU 1427  CE2 TYR A 221     5481   7480   4543    242   -852    236       C  
ATOM   1428  CZ  TYR A 221     -10.902  -1.318  17.291  1.00 63.81           C  
ANISOU 1428  CZ  TYR A 221     7798   9786   6660    167   -901    206       C  
ATOM   1429  OH  TYR A 221     -10.226  -1.845  18.389  1.00 76.69           O  
ANISOU 1429  OH  TYR A 221     9408  11516   8216    162  -1006    270       O  
ATOM   1430  N   TYR A 222     -15.776   1.253  12.584  1.00 54.63           N  
ANISOU 1430  N   TYR A 222     6854   8220   5682    398   -489    -43       N  
ATOM   1431  CA  TYR A 222     -16.425   1.323  11.276  1.00 49.28           C  
ANISOU 1431  CA  TYR A 222     6166   7501   5058    474   -454    -58       C  
ATOM   1432  C   TYR A 222     -17.630   2.219  11.275  1.00 48.46           C  
ANISOU 1432  C   TYR A 222     6142   7360   4910    555   -414   -114       C  
ATOM   1433  O   TYR A 222     -18.317   2.349  10.258  1.00 56.34           O  
ANISOU 1433  O   TYR A 222     7133   8338   5935    638   -399   -128       O  
ATOM   1434  CB  TYR A 222     -16.825  -0.089  10.844  1.00 44.15           C  
ANISOU 1434  CB  TYR A 222     5400   6894   4481    510   -443    -23       C  
ATOM   1435  CG  TYR A 222     -15.630  -0.992  10.939  1.00 49.93           C  
ANISOU 1435  CG  TYR A 222     6059   7651   5261    455   -481     34       C  
ATOM   1436  CD1 TYR A 222     -14.629  -0.958   9.959  1.00 46.49           C  
ANISOU 1436  CD1 TYR A 222     5588   7198   4879    426   -493     41       C  
ATOM   1437  CD2 TYR A 222     -15.436  -1.792  12.057  1.00 46.11           C  
ANISOU 1437  CD2 TYR A 222     5550   7209   4759    435   -504     81       C  
ATOM   1438  CE1 TYR A 222     -13.508  -1.755  10.071  1.00 50.62           C  
ANISOU 1438  CE1 TYR A 222     6025   7753   5455    394   -527     84       C  
ATOM   1439  CE2 TYR A 222     -14.316  -2.582  12.179  1.00 52.24           C  
ANISOU 1439  CE2 TYR A 222     6260   8010   5580    413   -551    139       C  
ATOM   1440  CZ  TYR A 222     -13.352  -2.560  11.190  1.00 55.10           C  
ANISOU 1440  CZ  TYR A 222     6562   8362   6010    399   -563    135       C  
ATOM   1441  OH  TYR A 222     -12.235  -3.357  11.322  1.00 58.13           O  
ANISOU 1441  OH  TYR A 222     6859   8780   6448    396   -608    185       O  
ATOM   1442  N   ARG A 223     -17.879   2.840  12.417  1.00 44.38           N  
ANISOU 1442  N   ARG A 223     5701   6842   4321    539   -400   -148       N  
ATOM   1443  CA  ARG A 223     -19.051   3.665  12.596  1.00 49.29           C  
ANISOU 1443  CA  ARG A 223     6391   7432   4905    631   -353   -211       C  
ATOM   1444  C   ARG A 223     -18.792   4.979  11.893  1.00 48.47           C  
ANISOU 1444  C   ARG A 223     6419   7217   4781    658   -348   -235       C  
ATOM   1445  O   ARG A 223     -17.730   5.583  12.070  1.00 50.32           O  
ANISOU 1445  O   ARG A 223     6735   7399   4983    556   -360   -236       O  
ATOM   1446  CB  ARG A 223     -19.329   3.883  14.095  1.00 50.40           C  
ANISOU 1446  CB  ARG A 223     6581   7602   4968    592   -325   -248       C  
ATOM   1447  CG  ARG A 223     -19.600   2.578  14.834  1.00 58.07           C  
ANISOU 1447  CG  ARG A 223     7454   8670   5941    558   -321   -213       C  
ATOM   1448  CD  ARG A 223     -20.905   2.555  15.543  1.00 60.52           C  
ANISOU 1448  CD  ARG A 223     7757   9022   6216    609   -248   -271       C  
ATOM   1449  NE  ARG A 223     -21.018   3.632  16.504  1.00 62.64           N  
ANISOU 1449  NE  ARG A 223     8146   9260   6395    594   -214   -336       N  
ATOM   1450  CZ  ARG A 223     -22.177   4.163  16.855  1.00 57.38           C  
ANISOU 1450  CZ  ARG A 223     7499   8598   5706    675   -138   -419       C  
ATOM   1451  NH1 ARG A 223     -23.297   3.718  16.309  1.00 48.45           N  
ANISOU 1451  NH1 ARG A 223     6255   7518   4635    771   -100   -445       N  
ATOM   1452  NH2 ARG A 223     -22.209   5.141  17.738  1.00 60.83           N  
ANISOU 1452  NH2 ARG A 223     8058   8994   6060    656    -98   -486       N  
ATOM   1453  N   ALA A 224     -19.758   5.417  11.099  1.00 43.95           N  
ANISOU 1453  N   ALA A 224     5867   6609   4221    792   -330   -256       N  
ATOM   1454  CA  ALA A 224     -19.682   6.721  10.454  1.00 48.99           C  
ANISOU 1454  CA  ALA A 224     6666   7118   4828    845   -318   -270       C  
ATOM   1455  C   ALA A 224     -19.863   7.799  11.520  1.00 56.02           C  
ANISOU 1455  C   ALA A 224     7697   7935   5652    845   -272   -334       C  
ATOM   1456  O   ALA A 224     -20.564   7.575  12.505  1.00 52.71           O  
ANISOU 1456  O   ALA A 224     7231   7580   5216    870   -244   -377       O  
ATOM   1457  CB  ALA A 224     -20.741   6.838   9.376  1.00 48.93           C  
ANISOU 1457  CB  ALA A 224     6640   7109   4842   1016   -326   -268       C  
ATOM   1458  N   PRO A 225     -19.245   8.974  11.329  1.00 60.44           N  
ANISOU 1458  N   PRO A 225     8439   8354   6169    804   -250   -347       N  
ATOM   1459  CA  PRO A 225     -19.336  10.019  12.363  1.00 58.21           C  
ANISOU 1459  CA  PRO A 225     8310   7987   5820    783   -195   -420       C  
ATOM   1460  C   PRO A 225     -20.779  10.445  12.693  1.00 64.88           C  
ANISOU 1460  C   PRO A 225     9176   8818   6660    973   -149   -477       C  
ATOM   1461  O   PRO A 225     -21.036  10.801  13.856  1.00 71.57           O  
ANISOU 1461  O   PRO A 225    10072   9663   7460    949    -99   -547       O  
ATOM   1462  CB  PRO A 225     -18.541  11.188  11.768  1.00 59.38           C  
ANISOU 1462  CB  PRO A 225     8665   7963   5934    722   -168   -421       C  
ATOM   1463  CG  PRO A 225     -18.459  10.882  10.272  1.00 68.37           C  
ANISOU 1463  CG  PRO A 225     9772   9090   7118    781   -203   -345       C  
ATOM   1464  CD  PRO A 225     -18.448   9.393  10.161  1.00 61.49           C  
ANISOU 1464  CD  PRO A 225     8661   8395   6308    762   -259   -304       C  
ATOM   1465  N   GLU A 226     -21.705  10.385  11.731  1.00 59.88           N  
ANISOU 1465  N   GLU A 226     8493   8190   6068   1156   -167   -454       N  
ATOM   1466  CA  GLU A 226     -23.104  10.728  12.022  1.00 55.28           C  
ANISOU 1466  CA  GLU A 226     7887   7624   5491   1352   -130   -517       C  
ATOM   1467  C   GLU A 226     -23.742   9.699  12.978  1.00 55.63           C  
ANISOU 1467  C   GLU A 226     7741   7845   5553   1322   -110   -559       C  
ATOM   1468  O   GLU A 226     -24.622  10.043  13.774  1.00 55.16           O  
ANISOU 1468  O   GLU A 226     7678   7804   5476   1405    -47   -640       O  
ATOM   1469  CB  GLU A 226     -23.948  10.847  10.742  1.00 50.34           C  
ANISOU 1469  CB  GLU A 226     7228   6998   4901   1560   -174   -484       C  
ATOM   1470  CG  GLU A 226     -23.975   9.608   9.894  1.00 61.01           C  
ANISOU 1470  CG  GLU A 226     8386   8493   6301   1537   -242   -428       C  
ATOM   1471  CD  GLU A 226     -22.926   9.621   8.792  1.00 68.33           C  
ANISOU 1471  CD  GLU A 226     9394   9346   7221   1453   -285   -345       C  
ATOM   1472  OE1 GLU A 226     -21.847  10.223   8.991  1.00 74.84           O  
ANISOU 1472  OE1 GLU A 226    10376  10049   8011   1321   -259   -331       O  
ATOM   1473  OE2 GLU A 226     -23.174   8.992   7.742  1.00 63.69           O  
ANISOU 1473  OE2 GLU A 226     8705   8833   6660   1505   -340   -304       O  
ATOM   1474  N   LEU A 227     -23.302   8.446  12.897  1.00 52.70           N  
ANISOU 1474  N   LEU A 227     7220   7592   5211   1205   -153   -506       N  
ATOM   1475  CA  LEU A 227     -23.739   7.432  13.843  1.00 53.74           C  
ANISOU 1475  CA  LEU A 227     7209   7865   5343   1144   -125   -531       C  
ATOM   1476  C   LEU A 227     -23.168   7.728  15.230  1.00 61.89           C  
ANISOU 1476  C   LEU A 227     8341   8876   6298   1008    -85   -565       C  
ATOM   1477  O   LEU A 227     -23.874   7.646  16.239  1.00 74.06           O  
ANISOU 1477  O   LEU A 227     9859  10478   7803   1014    -20   -630       O  
ATOM   1478  CB  LEU A 227     -23.296   6.047  13.384  1.00 53.15           C  
ANISOU 1478  CB  LEU A 227     6989   7888   5318   1052   -177   -456       C  
ATOM   1479  CG  LEU A 227     -23.964   5.499  12.127  1.00 50.75           C  
ANISOU 1479  CG  LEU A 227     6558   7643   5081   1158   -211   -438       C  
ATOM   1480  CD1 LEU A 227     -23.525   4.064  11.882  1.00 46.45           C  
ANISOU 1480  CD1 LEU A 227     5885   7182   4582   1048   -238   -381       C  
ATOM   1481  CD2 LEU A 227     -25.469   5.583  12.300  1.00 51.45           C  
ANISOU 1481  CD2 LEU A 227     6551   7815   5183   1300   -166   -520       C  
ATOM   1482  N   ILE A 228     -21.890   8.092  15.269  1.00 59.49           N  
ANISOU 1482  N   ILE A 228     8146   8497   5959    879   -121   -530       N  
ATOM   1483  CA  ILE A 228     -21.225   8.434  16.513  1.00 61.88           C  
ANISOU 1483  CA  ILE A 228     8546   8790   6174    736   -102   -567       C  
ATOM   1484  C   ILE A 228     -21.958   9.592  17.200  1.00 64.21           C  
ANISOU 1484  C   ILE A 228     8980   9003   6414    809    -13   -673       C  
ATOM   1485  O   ILE A 228     -22.067   9.617  18.438  1.00 59.49           O  
ANISOU 1485  O   ILE A 228     8416   8449   5739    734     34   -731       O  
ATOM   1486  CB  ILE A 228     -19.746   8.804  16.286  1.00 56.45           C  
ANISOU 1486  CB  ILE A 228     7944   8040   5465    589   -155   -532       C  
ATOM   1487  CG1 ILE A 228     -18.987   7.608  15.717  1.00 55.65           C  
ANISOU 1487  CG1 ILE A 228     7694   8029   5422    524   -234   -437       C  
ATOM   1488  CG2 ILE A 228     -19.095   9.267  17.594  1.00 52.78           C  
ANISOU 1488  CG2 ILE A 228     7581   7579   4894    436   -143   -589       C  
ATOM   1489  CD1 ILE A 228     -17.500   7.893  15.468  1.00 58.16           C  
ANISOU 1489  CD1 ILE A 228     8055   8315   5729    377   -284   -414       C  
ATOM   1490  N   PHE A 229     -22.432  10.550  16.393  1.00 60.79           N  
ANISOU 1490  N   PHE A 229     8639   8444   6014    959     13   -697       N  
ATOM   1491  CA  PHE A 229     -23.232  11.672  16.900  1.00 59.45           C  
ANISOU 1491  CA  PHE A 229     8602   8175   5810   1074    105   -800       C  
ATOM   1492  C   PHE A 229     -24.696  11.290  17.151  1.00 54.65           C  
ANISOU 1492  C   PHE A 229     7851   7676   5238   1237    157   -856       C  
ATOM   1493  O   PHE A 229     -25.517  12.159  17.422  1.00 56.04           O  
ANISOU 1493  O   PHE A 229     8102   7783   5408   1380    235   -944       O  
ATOM   1494  CB  PHE A 229     -23.208  12.874  15.941  1.00 68.36           C  
ANISOU 1494  CB  PHE A 229     9906   9110   6958   1197    114   -796       C  
ATOM   1495  CG  PHE A 229     -21.897  13.607  15.896  1.00 81.08           C  
ANISOU 1495  CG  PHE A 229    11708  10581   8517   1026    111   -785       C  
ATOM   1496  CD1 PHE A 229     -20.824  13.200  16.653  1.00 86.98           C  
ANISOU 1496  CD1 PHE A 229    12437  11399   9210    791     84   -786       C  
ATOM   1497  CD2 PHE A 229     -21.770  14.761  15.159  1.00 92.86           C  
ANISOU 1497  CD2 PHE A 229    13409  11868  10007   1100    141   -784       C  
ATOM   1498  CE1 PHE A 229     -19.630  13.892  16.617  1.00 88.32           C  
ANISOU 1498  CE1 PHE A 229    12760  11462   9334    620     84   -795       C  
ATOM   1499  CE2 PHE A 229     -20.573  15.456  15.133  1.00 95.34           C  
ANISOU 1499  CE2 PHE A 229    13903  12052  10271    915    157   -789       C  
ATOM   1500  CZ  PHE A 229     -19.511  15.019  15.866  1.00 86.06           C  
ANISOU 1500  CZ  PHE A 229    12677  10973   9050    669    129   -803       C  
ATOM   1501  N   GLY A 230     -25.027  10.006  17.032  1.00 55.10           N  
ANISOU 1501  N   GLY A 230     7702   7898   5336   1217    123   -812       N  
ATOM   1502  CA  GLY A 230     -26.377   9.530  17.297  1.00 58.98           C  
ANISOU 1502  CA  GLY A 230     8034   8517   5860   1330    181   -876       C  
ATOM   1503  C   GLY A 230     -27.515   9.947  16.372  1.00 64.93           C  
ANISOU 1503  C   GLY A 230     8711   9271   6687   1576    182   -911       C  
ATOM   1504  O   GLY A 230     -28.677   9.965  16.787  1.00 77.76           O  
ANISOU 1504  O   GLY A 230    10233  10983   8329   1689    255  -1004       O  
ATOM   1505  N   ALA A 231     -27.192  10.295  15.131  1.00 66.61           N  
ANISOU 1505  N   ALA A 231     8971   9399   6937   1662    102   -840       N  
ATOM   1506  CA  ALA A 231     -28.199  10.627  14.123  1.00 62.56           C  
ANISOU 1506  CA  ALA A 231     8386   8902   6482   1905     70   -852       C  
ATOM   1507  C   ALA A 231     -29.142   9.456  13.825  1.00 62.04           C  
ANISOU 1507  C   ALA A 231     8045   9053   6474   1941     52   -871       C  
ATOM   1508  O   ALA A 231     -28.711   8.303  13.741  1.00 58.93           O  
ANISOU 1508  O   ALA A 231     7546   8753   6092   1781     21   -817       O  
ATOM   1509  CB  ALA A 231     -27.525  11.087  12.842  1.00 47.74           C  
ANISOU 1509  CB  ALA A 231     6631   6898   4609   1952    -17   -754       C  
ATOM   1510  N   THR A 232     -30.419   9.771  13.609  1.00 61.70           N  
ANISOU 1510  N   THR A 232     7886   9087   6469   2156     70   -950       N  
ATOM   1511  CA  THR A 232     -31.432   8.757  13.330  1.00 66.42           C  
ANISOU 1511  CA  THR A 232     8209   9907   7122   2189     62   -996       C  
ATOM   1512  C   THR A 232     -31.950   8.880  11.880  1.00 70.52           C  
ANISOU 1512  C   THR A 232     8641  10471   7681   2385    -51   -963       C  
ATOM   1513  O   THR A 232     -32.786   8.081  11.445  1.00 69.83           O  
ANISOU 1513  O   THR A 232     8317  10577   7636   2416    -78  -1005       O  
ATOM   1514  CB  THR A 232     -32.630   8.844  14.318  1.00 65.37           C  
ANISOU 1514  CB  THR A 232     7944   9894   7002   2263    179  -1141       C  
ATOM   1515  OG1 THR A 232     -33.099  10.196  14.397  1.00 66.93           O  
ANISOU 1515  OG1 THR A 232     8252   9980   7197   2492    208  -1201       O  
ATOM   1516  CG2 THR A 232     -32.234   8.355  15.729  1.00 59.92           C  
ANISOU 1516  CG2 THR A 232     7297   9215   6256   2032    289  -1171       C  
ATOM   1517  N   ASP A 233     -31.435   9.867  11.140  1.00 65.62           N  
ANISOU 1517  N   ASP A 233     8223   9675   7035   2500   -116   -889       N  
ATOM   1518  CA  ASP A 233     -31.882  10.148   9.772  1.00 69.48           C  
ANISOU 1518  CA  ASP A 233     8680  10185   7535   2705   -230   -845       C  
ATOM   1519  C   ASP A 233     -30.757   9.901   8.758  1.00 69.57           C  
ANISOU 1519  C   ASP A 233     8812  10106   7516   2588   -315   -715       C  
ATOM   1520  O   ASP A 233     -30.695  10.536   7.699  1.00 68.96           O  
ANISOU 1520  O   ASP A 233     8849   9943   7410   2733   -396   -647       O  
ATOM   1521  CB  ASP A 233     -32.404  11.595   9.660  1.00 71.88           C  
ANISOU 1521  CB  ASP A 233     9135  10350   7825   2986   -229   -867       C  
ATOM   1522  CG  ASP A 233     -31.294  12.648   9.792  1.00 79.41           C  
ANISOU 1522  CG  ASP A 233    10431  11018   8723   2937   -197   -797       C  
ATOM   1523  OD1 ASP A 233     -30.170  12.301  10.229  1.00 80.26           O  
ANISOU 1523  OD1 ASP A 233    10631  11059   8805   2678   -163   -757       O  
ATOM   1524  OD2 ASP A 233     -31.558  13.837   9.487  1.00 80.27           O  
ANISOU 1524  OD2 ASP A 233    10718  10968   8813   3159   -203   -788       O  
ATOM   1525  N   TYR A 234     -29.870   8.974   9.098  1.00 65.29           N  
ANISOU 1525  N   TYR A 234     8248   9583   6976   2330   -291   -680       N  
ATOM   1526  CA  TYR A 234     -28.721   8.682   8.271  1.00 62.93           C  
ANISOU 1526  CA  TYR A 234     8047   9205   6657   2198   -350   -573       C  
ATOM   1527  C   TYR A 234     -29.123   7.971   6.957  1.00 71.27           C  
ANISOU 1527  C   TYR A 234     8957  10394   7727   2252   -445   -543       C  
ATOM   1528  O   TYR A 234     -30.250   7.505   6.803  1.00 70.67           O  
ANISOU 1528  O   TYR A 234     8673  10498   7683   2351   -467   -612       O  
ATOM   1529  CB  TYR A 234     -27.721   7.839   9.061  1.00 57.52           C  
ANISOU 1529  CB  TYR A 234     7354   8522   5978   1934   -301   -552       C  
ATOM   1530  CG  TYR A 234     -28.296   6.562   9.640  1.00 54.90           C  
ANISOU 1530  CG  TYR A 234     6796   8376   5688   1839   -265   -607       C  
ATOM   1531  CD1 TYR A 234     -28.284   5.387   8.913  1.00 57.21           C  
ANISOU 1531  CD1 TYR A 234     6941   8781   6015   1760   -307   -580       C  
ATOM   1532  CD2 TYR A 234     -28.853   6.533  10.912  1.00 55.88           C  
ANISOU 1532  CD2 TYR A 234     6870   8553   5810   1817   -175   -689       C  
ATOM   1533  CE1 TYR A 234     -28.801   4.224   9.428  1.00 56.44           C  
ANISOU 1533  CE1 TYR A 234     6663   8829   5953   1660   -259   -630       C  
ATOM   1534  CE2 TYR A 234     -29.372   5.367  11.437  1.00 54.08           C  
ANISOU 1534  CE2 TYR A 234     6458   8479   5609   1714   -127   -734       C  
ATOM   1535  CZ  TYR A 234     -29.336   4.214  10.694  1.00 52.04           C  
ANISOU 1535  CZ  TYR A 234     6068   8317   5389   1633   -168   -702       C  
ATOM   1536  OH  TYR A 234     -29.854   3.043  11.198  1.00 54.99           O  
ANISOU 1536  OH  TYR A 234     6282   8824   5787   1517   -105   -748       O  
ATOM   1537  N   THR A 235     -28.197   7.874   6.011  1.00 67.52           N  
ANISOU 1537  N   THR A 235     8587   9842   7226   2175   -497   -451       N  
ATOM   1538  CA  THR A 235     -28.500   7.169   4.775  1.00 63.80           C  
ANISOU 1538  CA  THR A 235     7994   9495   6753   2202   -582   -429       C  
ATOM   1539  C   THR A 235     -27.622   5.944   4.616  1.00 65.64           C  
ANISOU 1539  C   THR A 235     8158   9768   7014   1967   -568   -397       C  
ATOM   1540  O   THR A 235     -26.857   5.579   5.520  1.00 80.31           O  
ANISOU 1540  O   THR A 235    10039  11578   8897   1800   -502   -391       O  
ATOM   1541  CB  THR A 235     -28.298   8.066   3.559  1.00 59.73           C  
ANISOU 1541  CB  THR A 235     7660   8868   6167   2338   -659   -348       C  
ATOM   1542  OG1 THR A 235     -26.899   8.355   3.405  1.00 57.24           O  
ANISOU 1542  OG1 THR A 235     7553   8375   5822   2181   -627   -268       O  
ATOM   1543  CG2 THR A 235     -29.090   9.369   3.726  1.00 59.27           C  
ANISOU 1543  CG2 THR A 235     7709   8730   6080   2596   -671   -365       C  
ATOM   1544  N   SER A 236     -27.722   5.327   3.452  1.00 55.00           N  
ANISOU 1544  N   SER A 236     6733   8507   5657   1964   -633   -378       N  
ATOM   1545  CA  SER A 236     -26.915   4.155   3.109  1.00 61.67           C  
ANISOU 1545  CA  SER A 236     7519   9381   6530   1764   -618   -353       C  
ATOM   1546  C   SER A 236     -25.436   4.475   2.979  1.00 55.80           C  
ANISOU 1546  C   SER A 236     6962   8469   5769   1641   -594   -270       C  
ATOM   1547  O   SER A 236     -24.601   3.574   2.903  1.00 58.88           O  
ANISOU 1547  O   SER A 236     7313   8863   6194   1477   -567   -250       O  
ATOM   1548  CB  SER A 236     -27.409   3.529   1.797  1.00 66.53           C  
ANISOU 1548  CB  SER A 236     8026  10127   7126   1797   -691   -365       C  
ATOM   1549  OG  SER A 236     -28.593   2.782   2.028  1.00 80.77           O  
ANISOU 1549  OG  SER A 236     9600  12121   8967   1821   -692   -462       O  
ATOM   1550  N   SER A 237     -25.115   5.761   2.915  1.00 49.53           N  
ANISOU 1550  N   SER A 237     6372   7526   4920   1721   -598   -228       N  
ATOM   1551  CA  SER A 237     -23.728   6.170   2.842  1.00 50.84           C  
ANISOU 1551  CA  SER A 237     6713   7538   5066   1588   -563   -167       C  
ATOM   1552  C   SER A 237     -22.926   5.799   4.115  1.00 63.05           C  
ANISOU 1552  C   SER A 237     8233   9061   6661   1421   -498   -182       C  
ATOM   1553  O   SER A 237     -21.687   5.870   4.099  1.00 66.73           O  
ANISOU 1553  O   SER A 237     8785   9443   7126   1280   -473   -144       O  
ATOM   1554  CB  SER A 237     -23.643   7.663   2.554  1.00 50.89           C  
ANISOU 1554  CB  SER A 237     6961   7376   4998   1701   -567   -127       C  
ATOM   1555  OG  SER A 237     -24.412   8.400   3.473  1.00 58.67           O  
ANISOU 1555  OG  SER A 237     7975   8331   5985   1830   -547   -174       O  
ATOM   1556  N   ILE A 238     -23.599   5.385   5.195  1.00 48.63           N  
ANISOU 1556  N   ILE A 238     6286   7319   4872   1431   -473   -238       N  
ATOM   1557  CA  ILE A 238     -22.847   4.856   6.346  1.00 56.05           C  
ANISOU 1557  CA  ILE A 238     7196   8258   5842   1272   -426   -240       C  
ATOM   1558  C   ILE A 238     -22.149   3.545   5.972  1.00 56.65           C  
ANISOU 1558  C   ILE A 238     7159   8396   5969   1138   -432   -209       C  
ATOM   1559  O   ILE A 238     -21.046   3.264   6.473  1.00 53.85           O  
ANISOU 1559  O   ILE A 238     6824   8006   5630   1006   -415   -179       O  
ATOM   1560  CB  ILE A 238     -23.725   4.619   7.619  1.00 39.20           C  
ANISOU 1560  CB  ILE A 238     4971   6204   3721   1296   -386   -304       C  
ATOM   1561  CG1 ILE A 238     -24.728   3.475   7.402  1.00 46.33           C  
ANISOU 1561  CG1 ILE A 238     5671   7264   4668   1319   -387   -344       C  
ATOM   1562  CG2 ILE A 238     -24.400   5.925   8.105  1.00 40.50           C  
ANISOU 1562  CG2 ILE A 238     5246   6299   3842   1435   -364   -350       C  
ATOM   1563  CD1 ILE A 238     -25.425   2.989   8.667  1.00 39.30           C  
ANISOU 1563  CD1 ILE A 238     4686   6457   3790   1288   -325   -402       C  
ATOM   1564  N   ASP A 239     -22.771   2.766   5.081  1.00 50.92           N  
ANISOU 1564  N   ASP A 239     6316   7765   5267   1177   -456   -221       N  
ATOM   1565  CA  ASP A 239     -22.147   1.551   4.560  1.00 55.46           C  
ANISOU 1565  CA  ASP A 239     6803   8379   5892   1064   -451   -199       C  
ATOM   1566  C   ASP A 239     -20.836   1.904   3.850  1.00 54.15           C  
ANISOU 1566  C   ASP A 239     6745   8116   5712    991   -455   -146       C  
ATOM   1567  O   ASP A 239     -19.873   1.149   3.888  1.00 52.64           O  
ANISOU 1567  O   ASP A 239     6513   7920   5568    878   -435   -123       O  
ATOM   1568  CB  ASP A 239     -23.067   0.815   3.574  1.00 60.20           C  
ANISOU 1568  CB  ASP A 239     7282   9090   6502   1112   -474   -237       C  
ATOM   1569  CG  ASP A 239     -24.161   0.011   4.258  1.00 57.04           C  
ANISOU 1569  CG  ASP A 239     6728   8808   6138   1116   -446   -301       C  
ATOM   1570  OD1 ASP A 239     -24.029  -0.266   5.452  1.00 47.50           O  
ANISOU 1570  OD1 ASP A 239     5508   7589   4951   1054   -400   -301       O  
ATOM   1571  OD2 ASP A 239     -25.149  -0.378   3.586  1.00 63.93           O  
ANISOU 1571  OD2 ASP A 239     7489   9792   7008   1167   -468   -356       O  
ATOM   1572  N   VAL A 240     -20.826   3.052   3.179  1.00 54.83           N  
ANISOU 1572  N   VAL A 240     6973   8124   5733   1062   -475   -129       N  
ATOM   1573  CA  VAL A 240     -19.669   3.493   2.414  1.00 51.43           C  
ANISOU 1573  CA  VAL A 240     6663   7602   5277    983   -462    -86       C  
ATOM   1574  C   VAL A 240     -18.508   3.925   3.331  1.00 55.33           C  
ANISOU 1574  C   VAL A 240     7224   8017   5781    862   -427    -75       C  
ATOM   1575  O   VAL A 240     -17.347   3.579   3.087  1.00 59.51           O  
ANISOU 1575  O   VAL A 240     7738   8534   6340    739   -404    -58       O  
ATOM   1576  CB  VAL A 240     -20.054   4.656   1.472  1.00 49.37           C  
ANISOU 1576  CB  VAL A 240     6569   7262   4926   1094   -488    -63       C  
ATOM   1577  CG1 VAL A 240     -18.834   5.281   0.860  1.00 46.15           C  
ANISOU 1577  CG1 VAL A 240     6319   6737   4479    989   -450    -22       C  
ATOM   1578  CG2 VAL A 240     -21.024   4.183   0.397  1.00 54.87           C  
ANISOU 1578  CG2 VAL A 240     7191   8059   5598   1199   -541    -72       C  
ATOM   1579  N   TRP A 241     -18.825   4.676   4.385  1.00 54.90           N  
ANISOU 1579  N   TRP A 241     7234   7922   5702    897   -421    -94       N  
ATOM   1580  CA  TRP A 241     -17.825   5.034   5.396  1.00 48.28           C  
ANISOU 1580  CA  TRP A 241     6445   7038   4864    774   -396    -99       C  
ATOM   1581  C   TRP A 241     -17.160   3.769   5.963  1.00 46.93           C  
ANISOU 1581  C   TRP A 241     6111   6959   4760    672   -402    -90       C  
ATOM   1582  O   TRP A 241     -15.933   3.670   6.043  1.00 44.75           O  
ANISOU 1582  O   TRP A 241     5825   6675   4503    552   -397    -77       O  
ATOM   1583  CB  TRP A 241     -18.449   5.864   6.510  1.00 47.12           C  
ANISOU 1583  CB  TRP A 241     6377   6852   4676    831   -384   -135       C  
ATOM   1584  CG  TRP A 241     -17.467   6.187   7.582  1.00 54.30           C  
ANISOU 1584  CG  TRP A 241     7330   7733   5570    693   -367   -151       C  
ATOM   1585  CD1 TRP A 241     -17.068   5.364   8.615  1.00 43.95           C  
ANISOU 1585  CD1 TRP A 241     5903   6512   4283    610   -382   -153       C  
ATOM   1586  CD2 TRP A 241     -16.750   7.422   7.758  1.00 52.73           C  
ANISOU 1586  CD2 TRP A 241     7308   7413   5315    614   -335   -170       C  
ATOM   1587  NE1 TRP A 241     -16.147   6.007   9.381  1.00 44.13           N  
ANISOU 1587  NE1 TRP A 241     6004   6499   4267    490   -375   -174       N  
ATOM   1588  CE2 TRP A 241     -15.938   7.268   8.893  1.00 50.55           C  
ANISOU 1588  CE2 TRP A 241     6992   7182   5033    479   -340   -193       C  
ATOM   1589  CE3 TRP A 241     -16.725   8.637   7.074  1.00 54.24           C  
ANISOU 1589  CE3 TRP A 241     7700   7457   5453    641   -301   -170       C  
ATOM   1590  CZ2 TRP A 241     -15.101   8.281   9.354  1.00 57.78           C  
ANISOU 1590  CZ2 TRP A 241     8043   8017   5896    352   -312   -232       C  
ATOM   1591  CZ3 TRP A 241     -15.888   9.645   7.540  1.00 51.80           C  
ANISOU 1591  CZ3 TRP A 241     7545   7041   5095    512   -257   -203       C  
ATOM   1592  CH2 TRP A 241     -15.085   9.455   8.656  1.00 56.27           C  
ANISOU 1592  CH2 TRP A 241     8048   7672   5661    362   -263   -241       C  
ATOM   1593  N   SER A 242     -17.975   2.795   6.334  1.00 46.62           N  
ANISOU 1593  N   SER A 242     5947   7009   4757    722   -411    -97       N  
ATOM   1594  CA  SER A 242     -17.451   1.552   6.885  1.00 47.50           C  
ANISOU 1594  CA  SER A 242     5931   7188   4928    648   -414    -77       C  
ATOM   1595  C   SER A 242     -16.526   0.864   5.912  1.00 45.31           C  
ANISOU 1595  C   SER A 242     5596   6916   4706    589   -411    -52       C  
ATOM   1596  O   SER A 242     -15.454   0.383   6.286  1.00 44.20           O  
ANISOU 1596  O   SER A 242     5401   6789   4603    509   -417    -30       O  
ATOM   1597  CB  SER A 242     -18.590   0.618   7.281  1.00 50.98           C  
ANISOU 1597  CB  SER A 242     6271   7707   5394    703   -404    -92       C  
ATOM   1598  OG  SER A 242     -19.454   1.255   8.208  1.00 57.41           O  
ANISOU 1598  OG  SER A 242     7128   8527   6158    755   -393   -127       O  
ATOM   1599  N   ALA A 243     -16.950   0.805   4.657  1.00 45.60           N  
ANISOU 1599  N   ALA A 243     5636   6948   4741    635   -404    -60       N  
ATOM   1600  CA  ALA A 243     -16.113   0.233   3.606  1.00 47.07           C  
ANISOU 1600  CA  ALA A 243     5782   7133   4969    577   -385    -50       C  
ATOM   1601  C   ALA A 243     -14.780   0.997   3.503  1.00 47.33           C  
ANISOU 1601  C   ALA A 243     5885   7110   4988    481   -369    -41       C  
ATOM   1602  O   ALA A 243     -13.703   0.394   3.369  1.00 45.26           O  
ANISOU 1602  O   ALA A 243     5543   6869   4784    404   -352    -36       O  
ATOM   1603  CB  ALA A 243     -16.853   0.246   2.276  1.00 41.37           C  
ANISOU 1603  CB  ALA A 243     5083   6420   4215    639   -384    -65       C  
ATOM   1604  N   GLY A 244     -14.857   2.323   3.587  1.00 40.35           N  
ANISOU 1604  N   GLY A 244     5148   6154   4029    484   -368    -46       N  
ATOM   1605  CA  GLY A 244     -13.658   3.143   3.595  1.00 44.45           C  
ANISOU 1605  CA  GLY A 244     5746   6617   4526    368   -341    -52       C  
ATOM   1606  C   GLY A 244     -12.724   2.784   4.748  1.00 53.81           C  
ANISOU 1606  C   GLY A 244     6833   7858   5755    279   -360    -58       C  
ATOM   1607  O   GLY A 244     -11.508   2.723   4.541  1.00 57.57           O  
ANISOU 1607  O   GLY A 244     7260   8353   6262    172   -341    -69       O  
ATOM   1608  N   CYS A 245     -13.287   2.555   5.949  1.00 46.85           N  
ANISOU 1608  N   CYS A 245     5919   7014   4869    324   -397    -55       N  
ATOM   1609  CA  CYS A 245     -12.518   2.118   7.112  1.00 47.05           C  
ANISOU 1609  CA  CYS A 245     5855   7106   4915    259   -434    -49       C  
ATOM   1610  C   CYS A 245     -11.911   0.736   6.840  1.00 53.26           C  
ANISOU 1610  C   CYS A 245     6479   7961   5794    260   -445    -20       C  
ATOM   1611  O   CYS A 245     -10.784   0.443   7.268  1.00 58.83           O  
ANISOU 1611  O   CYS A 245     7097   8722   6534    195   -472    -16       O  
ATOM   1612  CB  CYS A 245     -13.387   2.107   8.404  1.00 49.12           C  
ANISOU 1612  CB  CYS A 245     6138   7391   5135    311   -462    -48       C  
ATOM   1613  SG  CYS A 245     -14.082   3.707   8.891  1.00 61.22           S  
ANISOU 1613  SG  CYS A 245     7860   8834   6566    325   -438    -95       S  
ATOM   1614  N   VAL A 246     -12.644  -0.123   6.141  1.00 48.41           N  
ANISOU 1614  N   VAL A 246     5822   7349   5224    336   -424     -6       N  
ATOM   1615  CA  VAL A 246     -12.074  -1.423   5.762  1.00 52.77           C  
ANISOU 1615  CA  VAL A 246     6243   7939   5868    341   -416     14       C  
ATOM   1616  C   VAL A 246     -10.905  -1.269   4.783  1.00 56.23           C  
ANISOU 1616  C   VAL A 246     6647   8375   6344    269   -380    -10       C  
ATOM   1617  O   VAL A 246      -9.867  -1.914   4.930  1.00 65.12           O  
ANISOU 1617  O   VAL A 246     7656   9546   7539    243   -388     -4       O  
ATOM   1618  CB  VAL A 246     -13.119  -2.362   5.131  1.00 49.56           C  
ANISOU 1618  CB  VAL A 246     5808   7528   5494    414   -387     15       C  
ATOM   1619  CG1 VAL A 246     -12.470  -3.692   4.780  1.00 43.71           C  
ANISOU 1619  CG1 VAL A 246     4954   6802   4851    416   -364     29       C  
ATOM   1620  CG2 VAL A 246     -14.294  -2.563   6.082  1.00 34.68           C  
ANISOU 1620  CG2 VAL A 246     3942   5659   3577    468   -404     25       C  
ATOM   1621  N   LEU A 247     -11.068  -0.408   3.786  1.00 52.13           N  
ANISOU 1621  N   LEU A 247     6230   7803   5774    242   -339    -36       N  
ATOM   1622  CA  LEU A 247      -9.987  -0.167   2.840  1.00 54.11           C  
ANISOU 1622  CA  LEU A 247     6468   8049   6044    152   -285    -65       C  
ATOM   1623  C   LEU A 247      -8.741   0.315   3.583  1.00 51.38           C  
ANISOU 1623  C   LEU A 247     6072   7743   5707     48   -301    -85       C  
ATOM   1624  O   LEU A 247      -7.682  -0.294   3.481  1.00 57.25           O  
ANISOU 1624  O   LEU A 247     6675   8549   6526      9   -291   -100       O  
ATOM   1625  CB  LEU A 247     -10.424   0.843   1.781  1.00 50.04           C  
ANISOU 1625  CB  LEU A 247     6116   7456   5441    135   -241    -77       C  
ATOM   1626  CG  LEU A 247      -9.405   1.426   0.812  1.00 51.59           C  
ANISOU 1626  CG  LEU A 247     6360   7624   5618     15   -166   -108       C  
ATOM   1627  CD1 LEU A 247      -8.784   0.338  -0.071  1.00 43.40           C  
ANISOU 1627  CD1 LEU A 247     5192   6637   4661     -2   -114   -130       C  
ATOM   1628  CD2 LEU A 247     -10.097   2.489  -0.020  1.00 52.73           C  
ANISOU 1628  CD2 LEU A 247     6714   7671   5649     28   -139    -95       C  
ATOM   1629  N   ALA A 248      -8.888   1.385   4.356  1.00 52.59           N  
ANISOU 1629  N   ALA A 248     6330   7867   5783      8   -327    -92       N  
ATOM   1630  CA  ALA A 248      -7.782   1.952   5.132  1.00 51.63           C  
ANISOU 1630  CA  ALA A 248     6170   7795   5651   -112   -349   -127       C  
ATOM   1631  C   ALA A 248      -7.072   0.891   5.990  1.00 50.27           C  
ANISOU 1631  C   ALA A 248     5804   7743   5554    -87   -418   -109       C  
ATOM   1632  O   ALA A 248      -5.846   0.792   5.990  1.00 55.79           O  
ANISOU 1632  O   ALA A 248     6376   8523   6300   -166   -421   -143       O  
ATOM   1633  CB  ALA A 248      -8.294   3.087   6.006  1.00 53.66           C  
ANISOU 1633  CB  ALA A 248     6580   7999   5811   -138   -370   -139       C  
ATOM   1634  N   GLU A 249      -7.851   0.086   6.700  1.00 50.15           N  
ANISOU 1634  N   GLU A 249     5765   7741   5549     27   -471    -56       N  
ATOM   1635  CA  GLU A 249      -7.297  -0.970   7.535  1.00 49.65           C  
ANISOU 1635  CA  GLU A 249     5552   7768   5543     77   -542    -17       C  
ATOM   1636  C   GLU A 249      -6.468  -1.970   6.738  1.00 51.33           C  
ANISOU 1636  C   GLU A 249     5613   8018   5871    106   -513    -18       C  
ATOM   1637  O   GLU A 249      -5.399  -2.416   7.197  1.00 52.41           O  
ANISOU 1637  O   GLU A 249     5603   8249   6060    105   -564    -17       O  
ATOM   1638  CB  GLU A 249      -8.422  -1.696   8.261  1.00 49.82           C  
ANISOU 1638  CB  GLU A 249     5614   7769   5548    186   -574     44       C  
ATOM   1639  CG  GLU A 249      -7.954  -2.684   9.325  1.00 58.36           C  
ANISOU 1639  CG  GLU A 249     6593   8925   6655    242   -654    102       C  
ATOM   1640  CD  GLU A 249      -9.101  -3.168  10.207  1.00 61.30           C  
ANISOU 1640  CD  GLU A 249     7044   9270   6978    312   -672    157       C  
ATOM   1641  OE1 GLU A 249     -10.109  -2.421  10.349  1.00 55.27           O  
ANISOU 1641  OE1 GLU A 249     6399   8462   6141    297   -643    132       O  
ATOM   1642  OE2 GLU A 249      -9.003  -4.312  10.722  1.00 60.21           O  
ANISOU 1642  OE2 GLU A 249     6852   9149   6876    387   -706    224       O  
ATOM   1643  N   LEU A 250      -6.951  -2.321   5.547  1.00 42.71           N  
ANISOU 1643  N   LEU A 250     4553   6860   4817    138   -434    -27       N  
ATOM   1644  CA  LEU A 250      -6.204  -3.233   4.675  1.00 51.26           C  
ANISOU 1644  CA  LEU A 250     5507   7963   6006    160   -383    -44       C  
ATOM   1645  C   LEU A 250      -4.859  -2.638   4.218  1.00 53.73           C  
ANISOU 1645  C   LEU A 250     5732   8340   6343     44   -347   -112       C  
ATOM   1646  O   LEU A 250      -3.868  -3.345   4.130  1.00 58.84           O  
ANISOU 1646  O   LEU A 250     6212   9059   7086     66   -345   -129       O  
ATOM   1647  CB  LEU A 250      -7.043  -3.606   3.468  1.00 58.05           C  
ANISOU 1647  CB  LEU A 250     6437   8744   6875    194   -302    -54       C  
ATOM   1648  CG  LEU A 250      -8.237  -4.442   3.909  1.00 52.52           C  
ANISOU 1648  CG  LEU A 250     5775   8004   6175    298   -327     -3       C  
ATOM   1649  CD1 LEU A 250      -9.039  -4.897   2.692  1.00 52.65           C  
ANISOU 1649  CD1 LEU A 250     5838   7966   6200    320   -254    -28       C  
ATOM   1650  CD2 LEU A 250      -7.753  -5.603   4.752  1.00 46.97           C  
ANISOU 1650  CD2 LEU A 250     4960   7332   5553    376   -372     46       C  
ATOM   1651  N   LEU A 251      -4.821  -1.337   3.946  1.00 55.26           N  
ANISOU 1651  N   LEU A 251     6039   8505   6451    -80   -312   -155       N  
ATOM   1652  CA  LEU A 251      -3.559  -0.662   3.642  1.00 52.38           C  
ANISOU 1652  CA  LEU A 251     5602   8204   6096   -226   -268   -229       C  
ATOM   1653  C   LEU A 251      -2.682  -0.455   4.877  1.00 59.69           C  
ANISOU 1653  C   LEU A 251     6404   9251   7023   -274   -362   -246       C  
ATOM   1654  O   LEU A 251      -1.472  -0.674   4.819  1.00 65.65           O  
ANISOU 1654  O   LEU A 251     6975  10121   7847   -325   -359   -299       O  
ATOM   1655  CB  LEU A 251      -3.824   0.694   2.995  1.00 51.69           C  
ANISOU 1655  CB  LEU A 251     5712   8024   5904   -354   -191   -265       C  
ATOM   1656  CG  LEU A 251      -4.770   0.687   1.804  1.00 53.78           C  
ANISOU 1656  CG  LEU A 251     6126   8176   6132   -306   -118   -242       C  
ATOM   1657  CD1 LEU A 251      -5.095   2.124   1.422  1.00 52.08           C  
ANISOU 1657  CD1 LEU A 251     6138   7856   5796   -406    -67   -256       C  
ATOM   1658  CD2 LEU A 251      -4.122  -0.085   0.649  1.00 55.64           C  
ANISOU 1658  CD2 LEU A 251     6253   8442   6446   -319    -29   -280       C  
ATOM   1659  N   LEU A 252      -3.281  -0.038   5.994  1.00 59.16           N  
ANISOU 1659  N   LEU A 252     6428   9174   6875   -258   -446   -211       N  
ATOM   1660  CA  LEU A 252      -2.505   0.249   7.209  1.00 58.68           C  
ANISOU 1660  CA  LEU A 252     6271   9239   6787   -318   -545   -232       C  
ATOM   1661  C   LEU A 252      -2.050  -1.007   7.932  1.00 62.72           C  
ANISOU 1661  C   LEU A 252     6595   9862   7374   -183   -649   -177       C  
ATOM   1662  O   LEU A 252      -1.003  -1.013   8.545  1.00 62.78           O  
ANISOU 1662  O   LEU A 252     6443  10015   7396   -223   -725   -209       O  
ATOM   1663  CB  LEU A 252      -3.308   1.096   8.185  1.00 58.20           C  
ANISOU 1663  CB  LEU A 252     6383   9128   6603   -348   -592   -218       C  
ATOM   1664  CG  LEU A 252      -3.433   2.583   7.900  1.00 60.38           C  
ANISOU 1664  CG  LEU A 252     6841   9314   6787   -505   -517   -285       C  
ATOM   1665  CD1 LEU A 252      -4.437   3.204   8.874  1.00 65.01           C  
ANISOU 1665  CD1 LEU A 252     7602   9833   7267   -482   -557   -264       C  
ATOM   1666  CD2 LEU A 252      -2.073   3.239   8.009  1.00 56.16           C  
ANISOU 1666  CD2 LEU A 252     6203   8887   6249   -693   -509   -382       C  
ATOM   1667  N   GLY A 253      -2.840  -2.071   7.872  1.00 64.35           N  
ANISOU 1667  N   GLY A 253     6825  10001   7623    -23   -655    -96       N  
ATOM   1668  CA  GLY A 253      -2.509  -3.271   8.620  1.00 62.46           C  
ANISOU 1668  CA  GLY A 253     6455   9834   7443    119   -750    -25       C  
ATOM   1669  C   GLY A 253      -3.067  -3.214  10.029  1.00 58.73           C  
ANISOU 1669  C   GLY A 253     6067   9382   6868    153   -858     40       C  
ATOM   1670  O   GLY A 253      -2.844  -4.124  10.830  1.00 53.45           O  
ANISOU 1670  O   GLY A 253     5325   8767   6215    268   -951    114       O  
ATOM   1671  N   GLN A 254      -3.847  -2.169  10.301  1.00 55.81           N  
ANISOU 1671  N   GLN A 254     5866   8952   6387     63   -837     16       N  
ATOM   1672  CA  GLN A 254      -4.513  -1.982  11.584  1.00 59.61           C  
ANISOU 1672  CA  GLN A 254     6454   9440   6756     77   -912     60       C  
ATOM   1673  C   GLN A 254      -5.645  -0.987  11.366  1.00 58.96           C  
ANISOU 1673  C   GLN A 254     6569   9238   6594     18   -834     26       C  
ATOM   1674  O   GLN A 254      -5.630  -0.268  10.367  1.00 67.82           O  
ANISOU 1674  O   GLN A 254     7738  10297   7731    -55   -748    -33       O  
ATOM   1675  CB  GLN A 254      -3.515  -1.475  12.627  1.00 57.00           C  
ANISOU 1675  CB  GLN A 254     6041   9261   6356     -9  -1025     27       C  
ATOM   1676  CG  GLN A 254      -3.073  -0.069  12.356  1.00 61.21           C  
ANISOU 1676  CG  GLN A 254     6613   9807   6838   -197   -979    -86       C  
ATOM   1677  CD  GLN A 254      -2.031   0.391  13.324  1.00 70.92           C  
ANISOU 1677  CD  GLN A 254     7739  11206   8002   -304  -1088   -138       C  
ATOM   1678  OE1 GLN A 254      -1.802   1.586  13.483  1.00 78.89           O  
ANISOU 1678  OE1 GLN A 254     8817  12223   8933   -475  -1063   -232       O  
ATOM   1679  NE2 GLN A 254      -1.376  -0.557  13.973  1.00 77.88           N  
ANISOU 1679  NE2 GLN A 254     8457  12225   8909   -202  -1212    -81       N  
ATOM   1680  N   PRO A 255      -6.629  -0.939  12.279  1.00 51.56           N  
ANISOU 1680  N   PRO A 255     5752   8269   5570     55   -858     64       N  
ATOM   1681  CA  PRO A 255      -7.779  -0.032  12.083  1.00 55.85           C  
ANISOU 1681  CA  PRO A 255     6470   8702   6048     30   -783     29       C  
ATOM   1682  C   PRO A 255      -7.369   1.433  11.910  1.00 49.18           C  
ANISOU 1682  C   PRO A 255     5708   7835   5144   -111   -750    -61       C  
ATOM   1683  O   PRO A 255      -6.450   1.860  12.573  1.00 49.38           O  
ANISOU 1683  O   PRO A 255     5685   7951   5126   -212   -808   -100       O  
ATOM   1684  CB  PRO A 255      -8.605  -0.211  13.373  1.00 54.48           C  
ANISOU 1684  CB  PRO A 255     6377   8540   5782     72   -825     69       C  
ATOM   1685  CG  PRO A 255      -8.197  -1.573  13.914  1.00 49.57           C  
ANISOU 1685  CG  PRO A 255     5645   7990   5198    158   -899    157       C  
ATOM   1686  CD  PRO A 255      -6.750  -1.745  13.513  1.00 48.52           C  
ANISOU 1686  CD  PRO A 255     5351   7945   5139    129   -949    142       C  
ATOM   1687  N   ILE A 256      -8.014   2.193  11.033  1.00 54.28           N  
ANISOU 1687  N   ILE A 256     6479   8362   5782   -121   -661    -94       N  
ATOM   1688  CA  ILE A 256      -7.603   3.588  10.888  1.00 56.95           C  
ANISOU 1688  CA  ILE A 256     6928   8651   6059   -259   -618   -174       C  
ATOM   1689  C   ILE A 256      -8.198   4.474  11.991  1.00 54.57           C  
ANISOU 1689  C   ILE A 256     6776   8316   5644   -291   -628   -208       C  
ATOM   1690  O   ILE A 256      -7.607   5.488  12.350  1.00 58.64           O  
ANISOU 1690  O   ILE A 256     7359   8826   6095   -432   -619   -280       O  
ATOM   1691  CB  ILE A 256      -7.987   4.196   9.507  1.00 49.14           C  
ANISOU 1691  CB  ILE A 256     6054   7531   5087   -258   -517   -190       C  
ATOM   1692  CG1 ILE A 256      -7.299   5.558   9.345  1.00 54.75           C  
ANISOU 1692  CG1 ILE A 256     6881   8185   5738   -427   -462   -268       C  
ATOM   1693  CG2 ILE A 256      -9.492   4.312   9.359  1.00 45.41           C  
ANISOU 1693  CG2 ILE A 256     5711   6958   4585   -125   -487   -160       C  
ATOM   1694  CD1 ILE A 256      -7.687   6.334   8.135  1.00 65.32           C  
ANISOU 1694  CD1 ILE A 256     8385   9373   7060   -431   -364   -275       C  
ATOM   1695  N   PHE A 257      -9.373   4.114  12.514  1.00 49.23           N  
ANISOU 1695  N   PHE A 257     6153   7613   4941   -174   -634   -168       N  
ATOM   1696  CA  PHE A 257     -10.000   4.922  13.565  1.00 54.69           C  
ANISOU 1696  CA  PHE A 257     6984   8272   5525   -196   -628   -210       C  
ATOM   1697  C   PHE A 257     -10.267   4.129  14.845  1.00 53.77           C  
ANISOU 1697  C   PHE A 257     6814   8255   5359   -155   -697   -169       C  
ATOM   1698  O   PHE A 257     -11.416   3.912  15.208  1.00 55.15           O  
ANISOU 1698  O   PHE A 257     7048   8398   5510    -63   -668   -150       O  
ATOM   1699  CB  PHE A 257     -11.313   5.534  13.070  1.00 54.20           C  
ANISOU 1699  CB  PHE A 257     7071   8072   5450    -97   -546   -222       C  
ATOM   1700  CG  PHE A 257     -11.161   6.426  11.865  1.00 64.28           C  
ANISOU 1700  CG  PHE A 257     8449   9229   6745   -125   -477   -250       C  
ATOM   1701  CD1 PHE A 257     -10.145   7.372  11.803  1.00 64.51           C  
ANISOU 1701  CD1 PHE A 257     8546   9226   6738   -286   -454   -312       C  
ATOM   1702  CD2 PHE A 257     -12.034   6.312  10.786  1.00 59.12           C  
ANISOU 1702  CD2 PHE A 257     7831   8499   6134      2   -434   -217       C  
ATOM   1703  CE1 PHE A 257     -10.020   8.193  10.695  1.00 59.21           C  
ANISOU 1703  CE1 PHE A 257     7999   8426   6071   -321   -377   -329       C  
ATOM   1704  CE2 PHE A 257     -11.909   7.127   9.685  1.00 49.13           C  
ANISOU 1704  CE2 PHE A 257     6682   7118   4865    -17   -376   -229       C  
ATOM   1705  CZ  PHE A 257     -10.905   8.065   9.635  1.00 52.25           C  
ANISOU 1705  CZ  PHE A 257     7167   7462   5222   -178   -341   -280       C  
ATOM   1706  N   PRO A 258      -9.206   3.696  15.540  1.00 49.36           N  
ANISOU 1706  N   PRO A 258     6146   7827   4780   -224   -790   -155       N  
ATOM   1707  CA  PRO A 258      -9.429   2.901  16.760  1.00 56.55           C  
ANISOU 1707  CA  PRO A 258     7030   8830   5626   -181   -863    -99       C  
ATOM   1708  C   PRO A 258     -10.023   3.707  17.923  1.00 65.22           C  
ANISOU 1708  C   PRO A 258     8278   9919   6584   -236   -848   -155       C  
ATOM   1709  O   PRO A 258     -10.038   4.944  17.884  1.00 60.04           O  
ANISOU 1709  O   PRO A 258     7738   9193   5880   -323   -795   -248       O  
ATOM   1710  CB  PRO A 258      -8.023   2.433  17.129  1.00 43.27           C  
ANISOU 1710  CB  PRO A 258     5195   7296   3948   -239   -978    -79       C  
ATOM   1711  CG  PRO A 258      -7.135   3.624  16.698  1.00 44.04           C  
ANISOU 1711  CG  PRO A 258     5301   7393   4040   -395   -957   -186       C  
ATOM   1712  CD  PRO A 258      -7.789   4.073  15.369  1.00 53.21           C  
ANISOU 1712  CD  PRO A 258     6546   8392   5280   -358   -832   -204       C  
ATOM   1713  N   GLY A 259     -10.458   2.991  18.966  1.00 67.61           N  
ANISOU 1713  N   GLY A 259     8588  10285   6815   -191   -889   -101       N  
ATOM   1714  CA  GLY A 259     -11.027   3.585  20.162  1.00 61.14           C  
ANISOU 1714  CA  GLY A 259     7904   9474   5850   -242   -871   -152       C  
ATOM   1715  C   GLY A 259     -12.169   2.777  20.766  1.00 66.87           C  
ANISOU 1715  C   GLY A 259     8671  10196   6540   -148   -833    -92       C  
ATOM   1716  O   GLY A 259     -13.031   2.262  20.049  1.00 67.83           O  
ANISOU 1716  O   GLY A 259     8770  10249   6755    -44   -763    -59       O  
ATOM   1717  N   ASP A 260     -12.203   2.695  22.098  1.00 71.02           N  
ANISOU 1717  N   ASP A 260     9262  10802   6919   -199   -873    -88       N  
ATOM   1718  CA  ASP A 260     -13.211   1.901  22.787  1.00 70.43           C  
ANISOU 1718  CA  ASP A 260     9238  10733   6790   -138   -828    -31       C  
ATOM   1719  C   ASP A 260     -14.427   2.754  23.139  1.00 70.41           C  
ANISOU 1719  C   ASP A 260     9365  10659   6727   -143   -699   -132       C  
ATOM   1720  O   ASP A 260     -15.414   2.263  23.690  1.00 77.55           O  
ANISOU 1720  O   ASP A 260    10314  11566   7585   -107   -629   -115       O  
ATOM   1721  CB  ASP A 260     -12.618   1.259  24.030  1.00 82.02           C  
ANISOU 1721  CB  ASP A 260    10720  12326   8118   -181   -937     42       C  
ATOM   1722  CG  ASP A 260     -11.646   0.149  23.693  1.00 96.06           C  
ANISOU 1722  CG  ASP A 260    12361  14165   9971   -120  -1055    162       C  
ATOM   1723  OD1 ASP A 260     -11.871  -0.527  22.666  1.00 98.80           O  
ANISOU 1723  OD1 ASP A 260    12629  14441  10471    -27  -1013    210       O  
ATOM   1724  OD2 ASP A 260     -10.656  -0.038  24.444  1.00103.54           O  
ANISOU 1724  OD2 ASP A 260    13280  15236  10824   -160  -1191    202       O  
ATOM   1725  N   SER A 261     -14.327   4.046  22.855  1.00 63.74           N  
ANISOU 1725  N   SER A 261     8587   9751   5881   -193   -660   -242       N  
ATOM   1726  CA  SER A 261     -15.459   4.947  22.970  1.00 58.95           C  
ANISOU 1726  CA  SER A 261     8096   9052   5249   -164   -531   -344       C  
ATOM   1727  C   SER A 261     -15.610   5.841  21.730  1.00 58.17           C  
ANISOU 1727  C   SER A 261     8013   8824   5264   -111   -474   -400       C  
ATOM   1728  O   SER A 261     -14.677   6.009  20.947  1.00 66.50           O  
ANISOU 1728  O   SER A 261     9019   9862   6385   -147   -529   -383       O  
ATOM   1729  CB  SER A 261     -15.314   5.815  24.200  1.00 56.68           C  
ANISOU 1729  CB  SER A 261     7948   8795   4794   -282   -520   -438       C  
ATOM   1730  OG  SER A 261     -14.318   6.779  23.954  1.00 61.60           O  
ANISOU 1730  OG  SER A 261     8605   9391   5409   -385   -562   -504       O  
ATOM   1731  N   GLY A 262     -16.796   6.409  21.565  1.00 55.31           N  
ANISOU 1731  N   GLY A 262     7721   8374   4920    -20   -362   -466       N  
ATOM   1732  CA  GLY A 262     -17.067   7.345  20.494  1.00 45.91           C  
ANISOU 1732  CA  GLY A 262     6582   7050   3813     51   -307   -515       C  
ATOM   1733  C   GLY A 262     -16.121   8.521  20.485  1.00 55.67           C  
ANISOU 1733  C   GLY A 262     7936   8213   5003    -67   -317   -584       C  
ATOM   1734  O   GLY A 262     -15.611   8.911  19.423  1.00 58.48           O  
ANISOU 1734  O   GLY A 262     8295   8490   5434    -67   -326   -572       O  
ATOM   1735  N   VAL A 263     -15.869   9.077  21.669  1.00 57.79           N  
ANISOU 1735  N   VAL A 263     8310   8507   5139   -184   -309   -661       N  
ATOM   1736  CA  VAL A 263     -15.025  10.265  21.789  1.00 59.32           C  
ANISOU 1736  CA  VAL A 263     8635   8628   5274   -326   -301   -751       C  
ATOM   1737  C   VAL A 263     -13.573   9.948  21.338  1.00 61.95           C  
ANISOU 1737  C   VAL A 263     8861   9039   5638   -451   -411   -703       C  
ATOM   1738  O   VAL A 263     -12.937  10.790  20.677  1.00 61.49           O  
ANISOU 1738  O   VAL A 263     8869   8886   5608   -529   -388   -749       O  
ATOM   1739  CB  VAL A 263     -15.073  10.863  23.251  1.00 67.36           C  
ANISOU 1739  CB  VAL A 263     9787   9679   6127   -444   -269   -859       C  
ATOM   1740  CG1 VAL A 263     -14.747   9.824  24.306  1.00 49.50           C  
ANISOU 1740  CG1 VAL A 263     7431   7610   3766   -510   -364   -801       C  
ATOM   1741  CG2 VAL A 263     -14.163  12.076  23.389  1.00 62.23           C  
ANISOU 1741  CG2 VAL A 263     9276   8955   5412   -619   -255   -968       C  
ATOM   1742  N   ASP A 264     -13.060   8.746  21.630  1.00 55.27           N  
ANISOU 1742  N   ASP A 264     7852   8354   4793   -462   -520   -611       N  
ATOM   1743  CA  ASP A 264     -11.726   8.381  21.109  1.00 60.61           C  
ANISOU 1743  CA  ASP A 264     8394   9112   5521   -548   -621   -568       C  
ATOM   1744  C   ASP A 264     -11.701   8.158  19.594  1.00 60.17           C  
ANISOU 1744  C   ASP A 264     8266   8976   5621   -459   -595   -512       C  
ATOM   1745  O   ASP A 264     -10.756   8.574  18.930  1.00 64.93           O  
ANISOU 1745  O   ASP A 264     8845   9562   6263   -554   -607   -536       O  
ATOM   1746  CB  ASP A 264     -11.146   7.123  21.786  1.00 67.30           C  
ANISOU 1746  CB  ASP A 264     9088  10147   6335   -553   -752   -475       C  
ATOM   1747  CG  ASP A 264     -11.016   7.263  23.297  1.00 86.27           C  
ANISOU 1747  CG  ASP A 264    11560  12658   8560   -654   -800   -518       C  
ATOM   1748  OD1 ASP A 264     -10.824   8.408  23.777  1.00 94.56           O  
ANISOU 1748  OD1 ASP A 264    12741  13674   9516   -786   -763   -641       O  
ATOM   1749  OD2 ASP A 264     -11.039   6.227  23.997  1.00 87.63           O  
ANISOU 1749  OD2 ASP A 264    11667  12948   8679   -612   -878   -429       O  
ATOM   1750  N   GLN A 265     -12.712   7.480  19.061  1.00 54.38           N  
ANISOU 1750  N   GLN A 265     7492   8205   4965   -293   -559   -444       N  
ATOM   1751  CA  GLN A 265     -12.841   7.311  17.616  1.00 51.75           C  
ANISOU 1751  CA  GLN A 265     7109   7793   4759   -203   -529   -400       C  
ATOM   1752  C   GLN A 265     -12.922   8.658  16.923  1.00 52.72           C  
ANISOU 1752  C   GLN A 265     7392   7754   4884   -225   -446   -472       C  
ATOM   1753  O   GLN A 265     -12.232   8.917  15.954  1.00 55.67           O  
ANISOU 1753  O   GLN A 265     7758   8082   5313   -274   -440   -465       O  
ATOM   1754  CB  GLN A 265     -14.077   6.487  17.285  1.00 49.69           C  
ANISOU 1754  CB  GLN A 265     6795   7524   4559    -33   -496   -341       C  
ATOM   1755  CG  GLN A 265     -13.959   5.045  17.717  1.00 53.35           C  
ANISOU 1755  CG  GLN A 265     7115   8115   5040     -9   -564   -253       C  
ATOM   1756  CD  GLN A 265     -15.299   4.438  18.035  1.00 54.97           C  
ANISOU 1756  CD  GLN A 265     7315   8326   5244    100   -510   -235       C  
ATOM   1757  OE1 GLN A 265     -16.348   4.997  17.697  1.00 55.61           O  
ANISOU 1757  OE1 GLN A 265     7458   8331   5340    185   -431   -284       O  
ATOM   1758  NE2 GLN A 265     -15.279   3.277  18.671  1.00 59.99           N  
ANISOU 1758  NE2 GLN A 265     7878   9054   5864    103   -551   -164       N  
ATOM   1759  N   LEU A 266     -13.753   9.526  17.472  1.00 61.99           N  
ANISOU 1759  N   LEU A 266     8724   8837   5992   -193   -372   -542       N  
ATOM   1760  CA  LEU A 266     -13.966  10.847  16.914  1.00 62.40           C  
ANISOU 1760  CA  LEU A 266     8966   8705   6037   -187   -283   -607       C  
ATOM   1761  C   LEU A 266     -12.662  11.636  16.875  1.00 62.19           C  
ANISOU 1761  C   LEU A 266     9013   8645   5971   -395   -284   -666       C  
ATOM   1762  O   LEU A 266     -12.413  12.355  15.918  1.00 67.45           O  
ANISOU 1762  O   LEU A 266     9783   9176   6667   -416   -229   -675       O  
ATOM   1763  CB  LEU A 266     -15.009  11.587  17.741  1.00 65.65           C  
ANISOU 1763  CB  LEU A 266     9529   9038   6379   -118   -204   -685       C  
ATOM   1764  CG  LEU A 266     -15.712  12.721  17.024  1.00 71.69           C  
ANISOU 1764  CG  LEU A 266    10479   9596   7163     -4   -108   -723       C  
ATOM   1765  CD1 LEU A 266     -16.635  12.138  15.953  1.00 69.49           C  
ANISOU 1765  CD1 LEU A 266    10107   9313   6982    207   -116   -641       C  
ATOM   1766  CD2 LEU A 266     -16.473  13.561  18.049  1.00 68.71           C  
ANISOU 1766  CD2 LEU A 266    10259   9142   6705     28    -23   -827       C  
ATOM   1767  N   VAL A 267     -11.830  11.476  17.909  1.00 61.73           N  
ANISOU 1767  N   VAL A 267     8897   8720   5837   -555   -347   -707       N  
ATOM   1768  CA  VAL A 267     -10.526  12.138  17.993  1.00 54.52           C  
ANISOU 1768  CA  VAL A 267     8013   7822   4880   -781   -358   -781       C  
ATOM   1769  C   VAL A 267      -9.623  11.618  16.881  1.00 60.23           C  
ANISOU 1769  C   VAL A 267     8588   8596   5703   -817   -396   -721       C  
ATOM   1770  O   VAL A 267      -8.928  12.390  16.209  1.00 63.48           O  
ANISOU 1770  O   VAL A 267     9076   8920   6125   -945   -340   -770       O  
ATOM   1771  CB  VAL A 267      -9.818  11.885  19.380  1.00 66.83           C  
ANISOU 1771  CB  VAL A 267     9496   9568   6329   -932   -451   -831       C  
ATOM   1772  CG1 VAL A 267      -8.308  12.067  19.271  1.00 55.02           C  
ANISOU 1772  CG1 VAL A 267     7906   8174   4825  -1147   -508   -881       C  
ATOM   1773  CG2 VAL A 267     -10.398  12.775  20.492  1.00 50.65           C  
ANISOU 1773  CG2 VAL A 267     7642   7451   4151   -980   -387   -938       C  
ATOM   1774  N   GLU A 268      -9.642  10.303  16.683  1.00 58.25           N  
ANISOU 1774  N   GLU A 268     8133   8476   5523   -708   -478   -620       N  
ATOM   1775  CA  GLU A 268      -8.834   9.680  15.642  1.00 63.92           C  
ANISOU 1775  CA  GLU A 268     8695   9249   6343   -722   -508   -567       C  
ATOM   1776  C   GLU A 268      -9.277  10.127  14.241  1.00 65.67           C  
ANISOU 1776  C   GLU A 268     9022   9298   6630   -648   -412   -543       C  
ATOM   1777  O   GLU A 268      -8.449  10.264  13.343  1.00 70.99           O  
ANISOU 1777  O   GLU A 268     9664   9959   7350   -739   -387   -549       O  
ATOM   1778  CB  GLU A 268      -8.885   8.159  15.764  1.00 64.72           C  
ANISOU 1778  CB  GLU A 268     8585   9499   6505   -602   -602   -465       C  
ATOM   1779  CG  GLU A 268      -8.290   7.644  17.045  1.00 73.40           C  
ANISOU 1779  CG  GLU A 268     9579  10777   7534   -668   -713   -467       C  
ATOM   1780  CD  GLU A 268      -6.790   7.879  17.140  1.00 84.48           C  
ANISOU 1780  CD  GLU A 268    10871  12302   8926   -850   -774   -527       C  
ATOM   1781  OE1 GLU A 268      -6.271   7.908  18.289  1.00 87.42           O  
ANISOU 1781  OE1 GLU A 268    11206  12810   9199   -945   -861   -565       O  
ATOM   1782  OE2 GLU A 268      -6.139   8.049  16.078  1.00 81.95           O  
ANISOU 1782  OE2 GLU A 268    10498  11952   8686   -906   -732   -542       O  
ATOM   1783  N   ILE A 269     -10.581  10.327  14.064  1.00 59.64           N  
ANISOU 1783  N   ILE A 269     8377   8417   5865   -481   -362   -518       N  
ATOM   1784  CA  ILE A 269     -11.139  10.786  12.796  1.00 54.33           C  
ANISOU 1784  CA  ILE A 269     7822   7585   5234   -382   -287   -488       C  
ATOM   1785  C   ILE A 269     -10.741  12.231  12.563  1.00 61.57           C  
ANISOU 1785  C   ILE A 269     8970   8333   6092   -510   -196   -562       C  
ATOM   1786  O   ILE A 269     -10.274  12.591  11.485  1.00 63.25           O  
ANISOU 1786  O   ILE A 269     9245   8460   6328   -562   -146   -548       O  
ATOM   1787  CB  ILE A 269     -12.670  10.668  12.779  1.00 51.74           C  
ANISOU 1787  CB  ILE A 269     7545   7200   4914   -161   -269   -454       C  
ATOM   1788  CG1 ILE A 269     -13.085   9.203  12.922  1.00 43.96           C  
ANISOU 1788  CG1 ILE A 269     6345   6369   3988    -56   -340   -384       C  
ATOM   1789  CG2 ILE A 269     -13.270  11.304  11.503  1.00 50.54           C  
ANISOU 1789  CG2 ILE A 269     7538   6883   4782    -45   -207   -425       C  
ATOM   1790  CD1 ILE A 269     -14.538   9.059  13.267  1.00 45.10           C  
ANISOU 1790  CD1 ILE A 269     6510   6499   4126    118   -321   -380       C  
ATOM   1791  N   ILE A 270     -10.868  13.043  13.610  1.00 68.98           N  
ANISOU 1791  N   ILE A 270    10042   9220   6946   -579   -167   -646       N  
ATOM   1792  CA  ILE A 270     -10.494  14.453  13.540  1.00 69.20           C  
ANISOU 1792  CA  ILE A 270    10316   9067   6910   -719    -67   -731       C  
ATOM   1793  C   ILE A 270      -8.994  14.611  13.287  1.00 62.58           C  
ANISOU 1793  C   ILE A 270     9418   8289   6068   -976    -63   -780       C  
ATOM   1794  O   ILE A 270      -8.574  15.575  12.655  1.00 69.49           O  
ANISOU 1794  O   ILE A 270    10478   9005   6920  -1095     36   -819       O  
ATOM   1795  CB  ILE A 270     -10.908  15.215  14.838  1.00 57.91           C  
ANISOU 1795  CB  ILE A 270     9034   7585   5386   -755    -32   -830       C  
ATOM   1796  CG1 ILE A 270     -12.433  15.283  14.950  1.00 59.16           C  
ANISOU 1796  CG1 ILE A 270     9276   7653   5551   -499     -3   -801       C  
ATOM   1797  CG2 ILE A 270     -10.362  16.640  14.855  1.00 57.77           C  
ANISOU 1797  CG2 ILE A 270     9274   7378   5297   -942     78   -935       C  
ATOM   1798  CD1 ILE A 270     -12.952  16.062  16.164  1.00 59.88           C  
ANISOU 1798  CD1 ILE A 270     9524   7675   5553   -512     54   -906       C  
ATOM   1799  N   LYS A 271      -8.183  13.669  13.764  1.00 63.00           N  
ANISOU 1799  N   LYS A 271     9218   8574   6145  -1060   -165   -778       N  
ATOM   1800  CA  LYS A 271      -6.737  13.743  13.531  1.00 68.33           C  
ANISOU 1800  CA  LYS A 271     9787   9345   6828  -1295   -169   -835       C  
ATOM   1801  C   LYS A 271      -6.378  13.561  12.042  1.00 72.21           C  
ANISOU 1801  C   LYS A 271    10252   9784   7401  -1289   -115   -779       C  
ATOM   1802  O   LYS A 271      -5.347  14.064  11.575  1.00 73.33           O  
ANISOU 1802  O   LYS A 271    10407   9916   7539  -1498    -53   -842       O  
ATOM   1803  CB  LYS A 271      -5.986  12.711  14.384  1.00 62.34           C  
ANISOU 1803  CB  LYS A 271     8747   8861   6081  -1346   -309   -837       C  
ATOM   1804  CG  LYS A 271      -5.656  13.189  15.784  1.00 70.47           C  
ANISOU 1804  CG  LYS A 271     9805   9973   6997  -1495   -352   -940       C  
ATOM   1805  CD  LYS A 271      -4.975  12.097  16.631  1.00 74.44           C  
ANISOU 1805  CD  LYS A 271    10032  10755   7496  -1508   -512   -919       C  
ATOM   1806  N   VAL A 272      -7.239  12.867  11.304  1.00 71.87           N  
ANISOU 1806  N   VAL A 272    10176   9710   7420  -1064   -131   -670       N  
ATOM   1807  CA  VAL A 272      -7.025  12.618   9.881  1.00 73.98           C  
ANISOU 1807  CA  VAL A 272    10426   9934   7750  -1039    -83   -612       C  
ATOM   1808  C   VAL A 272      -7.814  13.600   9.006  1.00 73.01           C  
ANISOU 1808  C   VAL A 272    10597   9560   7586   -959     22   -583       C  
ATOM   1809  O   VAL A 272      -7.242  14.236   8.125  1.00 67.99           O  
ANISOU 1809  O   VAL A 272    10088   8815   6931  -1085    116   -597       O  
ATOM   1810  CB  VAL A 272      -7.408  11.162   9.506  1.00 61.64           C  
ANISOU 1810  CB  VAL A 272     8637   8505   6278   -853   -167   -515       C  
ATOM   1811  CG1 VAL A 272      -7.493  10.985   7.991  1.00 51.10           C  
ANISOU 1811  CG1 VAL A 272     7333   7096   4987   -796   -109   -456       C  
ATOM   1812  CG2 VAL A 272      -6.436  10.158  10.138  1.00 45.56           C  
ANISOU 1812  CG2 VAL A 272     6318   6701   4291   -926   -264   -529       C  
ATOM   1813  N   LEU A 273      -9.112  13.744   9.286  1.00 73.54           N  
ANISOU 1813  N   LEU A 273    10773   9538   7632   -751      8   -544       N  
ATOM   1814  CA  LEU A 273     -10.027  14.558   8.475  1.00 67.70           C  
ANISOU 1814  CA  LEU A 273    10290   8576   6857   -609     79   -499       C  
ATOM   1815  C   LEU A 273     -10.061  16.044   8.836  1.00 66.63           C  
ANISOU 1815  C   LEU A 273    10462   8219   6635   -694    181   -569       C  
ATOM   1816  O   LEU A 273     -10.635  16.846   8.103  1.00 66.42           O  
ANISOU 1816  O   LEU A 273    10683   7982   6571   -593    250   -530       O  
ATOM   1817  CB  LEU A 273     -11.455  14.017   8.580  1.00 66.52           C  
ANISOU 1817  CB  LEU A 273    10092   8448   6734   -329     17   -436       C  
ATOM   1818  CG  LEU A 273     -11.749  12.602   8.101  1.00 63.56           C  
ANISOU 1818  CG  LEU A 273     9466   8245   6439   -206    -67   -361       C  
ATOM   1819  CD1 LEU A 273     -13.257  12.419   7.925  1.00 51.23           C  
ANISOU 1819  CD1 LEU A 273     7924   6655   4886     57    -97   -312       C  
ATOM   1820  CD2 LEU A 273     -11.033  12.422   6.782  1.00 70.06           C  
ANISOU 1820  CD2 LEU A 273    10280   9057   7285   -280    -35   -321       C  
ATOM   1821  N   GLY A 274      -9.496  16.407   9.980  1.00 81.57           N  
ANISOU 1821  N   GLY A 274    11613   8996  10383   -444   -510   2994       N  
ATOM   1822  CA  GLY A 274      -9.658  17.757  10.493  1.00 80.80           C  
ANISOU 1822  CA  GLY A 274    11598   8844  10259   -452   -964   2864       C  
ATOM   1823  C   GLY A 274     -10.960  17.908  11.268  1.00 83.83           C  
ANISOU 1823  C   GLY A 274    11946   9314  10592   -200  -1234   2601       C  
ATOM   1824  O   GLY A 274     -11.769  16.975  11.336  1.00 80.98           O  
ANISOU 1824  O   GLY A 274    11480   9055  10234    -51  -1076   2522       O  
ATOM   1825  N   THR A 275     -11.156  19.072  11.883  1.00 83.82           N  
ANISOU 1825  N   THR A 275    12025   9254  10570   -159  -1598   2455       N  
ATOM   1826  CA  THR A 275     -12.369  19.309  12.657  1.00 80.12           C  
ANISOU 1826  CA  THR A 275    11528   8858  10057    115  -1826   2216       C  
ATOM   1827  C   THR A 275     -13.540  19.537  11.712  1.00 72.94           C  
ANISOU 1827  C   THR A 275    10871   7770   9071    211  -1972   2108       C  
ATOM   1828  O   THR A 275     -13.451  20.353  10.795  1.00 73.13           O  
ANISOU 1828  O   THR A 275    11220   7536   9030    113  -2117   2156       O  
ATOM   1829  CB  THR A 275     -12.221  20.511  13.621  1.00 81.53           C  
ANISOU 1829  CB  THR A 275    11759   8999  10222    143  -2140   2058       C  
ATOM   1830  OG1 THR A 275     -11.062  20.323  14.443  1.00 81.55           O  
ANISOU 1830  OG1 THR A 275    11489   9244  10252     19  -2064   2144       O  
ATOM   1831  CG2 THR A 275     -13.436  20.625  14.528  1.00 80.85           C  
ANISOU 1831  CG2 THR A 275    11616   9021  10082    477  -2290   1829       C  
ATOM   1832  N   PRO A 276     -14.644  18.805  11.929  1.00 69.00           N  
ANISOU 1832  N   PRO A 276    10203   7431   8581    410  -1924   1979       N  
ATOM   1833  CA  PRO A 276     -15.803  19.055  11.085  1.00 72.14           C  
ANISOU 1833  CA  PRO A 276    10762   7751   8897    511  -2127   1859       C  
ATOM   1834  C   PRO A 276     -16.276  20.480  11.293  1.00 78.53           C  
ANISOU 1834  C   PRO A 276    11791   8386   9661    692  -2496   1777       C  
ATOM   1835  O   PRO A 276     -16.348  20.947  12.431  1.00 86.44           O  
ANISOU 1835  O   PRO A 276    12709   9419  10717    839  -2579   1675       O  
ATOM   1836  CB  PRO A 276     -16.829  18.031  11.576  1.00 71.03           C  
ANISOU 1836  CB  PRO A 276    10297   7844   8848    664  -1986   1714       C  
ATOM   1837  CG  PRO A 276     -16.400  17.699  12.960  1.00 65.04           C  
ANISOU 1837  CG  PRO A 276     9286   7241   8185    766  -1803   1751       C  
ATOM   1838  CD  PRO A 276     -14.905  17.749  12.923  1.00 66.24           C  
ANISOU 1838  CD  PRO A 276     9499   7347   8322    555  -1674   1955       C  
ATOM   1839  N   THR A 277     -16.558  21.169  10.198  1.00 71.55           N  
ANISOU 1839  N   THR A 277    11219   7311   8656    700  -2688   1832       N  
ATOM   1840  CA  THR A 277     -17.028  22.537  10.263  1.00 76.54           C  
ANISOU 1840  CA  THR A 277    12112   7709   9260    913  -2982   1803       C  
ATOM   1841  C   THR A 277     -18.390  22.571  10.939  1.00 80.24           C  
ANISOU 1841  C   THR A 277    12369   8347   9770   1273  -3138   1615       C  
ATOM   1842  O   THR A 277     -18.997  21.518  11.169  1.00 76.77           O  
ANISOU 1842  O   THR A 277    11587   8201   9380   1311  -3024   1518       O  
ATOM   1843  CB  THR A 277     -17.151  23.154   8.863  1.00 80.72           C  
ANISOU 1843  CB  THR A 277    13016   8038   9616    922  -3120   1969       C  
ATOM   1844  OG1 THR A 277     -18.306  22.614   8.205  1.00 80.14           O  
ANISOU 1844  OG1 THR A 277    12817   8221   9411   1095  -3253   1902       O  
ATOM   1845  CG2 THR A 277     -15.906  22.863   8.031  1.00 82.64           C  
ANISOU 1845  CG2 THR A 277    13433   8166   9801    570  -2886   2172       C  
ATOM   1846  N   ARG A 278     -18.873  23.776  11.246  1.00 81.76           N  
ANISOU 1846  N   ARG A 278    12768   8325   9973   1537  -3351   1571       N  
ATOM   1847  CA  ARG A 278     -20.208  23.928  11.811  1.00 83.44           C  
ANISOU 1847  CA  ARG A 278    12788   8681  10233   1933  -3481   1424       C  
ATOM   1848  C   ARG A 278     -21.213  23.330  10.835  1.00 91.85           C  
ANISOU 1848  C   ARG A 278    13669  10007  11223   2033  -3596   1448       C  
ATOM   1849  O   ARG A 278     -22.142  22.632  11.243  1.00 97.68           O  
ANISOU 1849  O   ARG A 278    14017  11046  12053   2168  -3568   1311       O  
ATOM   1850  CB  ARG A 278     -20.537  25.400  12.098  1.00 81.39           C  
ANISOU 1850  CB  ARG A 278    12857   8077   9991   2232  -3655   1406       C  
ATOM   1851  N   GLU A 279     -21.000  23.580   9.543  1.00 93.38           N  
ANISOU 1851  N   GLU A 279    14134  10106  11240   1942  -3713   1615       N  
ATOM   1852  CA  GLU A 279     -21.872  23.042   8.498  1.00 94.20           C  
ANISOU 1852  CA  GLU A 279    14091  10510  11192   1997  -3877   1611       C  
ATOM   1853  C   GLU A 279     -21.705  21.524   8.371  1.00 94.31           C  
ANISOU 1853  C   GLU A 279    13797  10799  11238   1656  -3646   1476       C  
ATOM   1854  O   GLU A 279     -22.697  20.797   8.299  1.00 97.68           O  
ANISOU 1854  O   GLU A 279    13859  11545  11708   1697  -3700   1306       O  
ATOM   1855  CB  GLU A 279     -21.607  23.727   7.146  1.00 88.83           C  
ANISOU 1855  CB  GLU A 279    13843   9674  10236   2013  -4045   1847       C  
ATOM   1856  N   GLN A 280     -20.459  21.049   8.334  1.00 87.77           N  
ANISOU 1856  N   GLN A 280    13101   9832  10416   1318  -3361   1552       N  
ATOM   1857  CA  GLN A 280     -20.201  19.614   8.261  1.00 85.60           C  
ANISOU 1857  CA  GLN A 280    12586   9736  10202   1024  -3054   1452       C  
ATOM   1858  C   GLN A 280     -20.844  18.914   9.437  1.00 87.13           C  
ANISOU 1858  C   GLN A 280    12341  10118  10648   1121  -2897   1282       C  
ATOM   1859  O   GLN A 280     -21.414  17.833   9.296  1.00 89.82           O  
ANISOU 1859  O   GLN A 280    12395  10660  11072   1001  -2750   1126       O  
ATOM   1860  CB  GLN A 280     -18.703  19.302   8.237  1.00 82.70           C  
ANISOU 1860  CB  GLN A 280    12391   9183   9848    730  -2731   1612       C  
ATOM   1861  CG  GLN A 280     -18.098  19.273   6.859  1.00 85.91           C  
ANISOU 1861  CG  GLN A 280    13137   9490  10016    522  -2694   1745       C  
ATOM   1862  CD  GLN A 280     -16.601  19.089   6.897  1.00 90.64           C  
ANISOU 1862  CD  GLN A 280    13862   9903  10673    269  -2358   1938       C  
ATOM   1863  OE1 GLN A 280     -15.925  19.559   7.813  1.00 89.82           O  
ANISOU 1863  OE1 GLN A 280    13707   9690  10731    274  -2310   2020       O  
ATOM   1864  NE2 GLN A 280     -16.071  18.384   5.908  1.00 92.98           N  
ANISOU 1864  NE2 GLN A 280    14306  10192  10832     43  -2118   1997       N  
ATOM   1865  N   ILE A 281     -20.746  19.540  10.603  1.00 85.26           N  
ANISOU 1865  N   ILE A 281    12071   9798  10526   1327  -2903   1301       N  
ATOM   1866  CA  ILE A 281     -21.381  18.995  11.782  1.00 83.59           C  
ANISOU 1866  CA  ILE A 281    11482   9766  10511   1485  -2736   1175       C  
ATOM   1867  C   ILE A 281     -22.881  18.947  11.510  1.00 83.90           C  
ANISOU 1867  C   ILE A 281    11254  10019  10607   1684  -2933   1022       C  
ATOM   1868  O   ILE A 281     -23.471  17.880  11.585  1.00 86.35           O  
ANISOU 1868  O   ILE A 281    11213  10529  11068   1581  -2740    894       O  
ATOM   1869  CB  ILE A 281     -21.026  19.815  13.049  1.00 89.72           C  
ANISOU 1869  CB  ILE A 281    12337  10437  11317   1698  -2748   1193       C  
ATOM   1870  CG1 ILE A 281     -19.642  19.414  13.553  1.00 83.73           C  
ANISOU 1870  CG1 ILE A 281    11624   9637  10551   1472  -2492   1308       C  
ATOM   1871  CG2 ILE A 281     -21.978  19.550  14.161  1.00 90.38           C  
ANISOU 1871  CG2 ILE A 281    12091  10710  11540   1979  -2643   1068       C  
ATOM   1872  CD1 ILE A 281     -18.982  20.467  14.397  1.00 85.15           C  
ANISOU 1872  CD1 ILE A 281    12002   9679  10672   1550  -2617   1304       C  
ATOM   1873  N   ARG A 282     -23.475  20.065  11.101  1.00 89.57           N  
ANISOU 1873  N   ARG A 282    12125  10692  11217   1952  -3300   1050       N  
ATOM   1874  CA  ARG A 282     -24.919  20.119  10.811  1.00 94.38           C  
ANISOU 1874  CA  ARG A 282    12422  11567  11873   2193  -3538    938       C  
ATOM   1875  C   ARG A 282     -25.411  18.995   9.884  1.00100.10           C  
ANISOU 1875  C   ARG A 282    12872  12576  12585   1901  -3538    790       C  
ATOM   1876  O   ARG A 282     -26.490  18.444  10.097  1.00 99.40           O  
ANISOU 1876  O   ARG A 282    12321  12764  12681   1948  -3533    618       O  
ATOM   1877  CB  ARG A 282     -25.289  21.476  10.198  1.00 90.61           C  
ANISOU 1877  CB  ARG A 282    12226  10983  11219   2526  -3930   1073       C  
ATOM   1878  N   GLU A 283     -24.598  18.634   8.889  1.00104.59           N  
ANISOU 1878  N   GLU A 283    13722  13067  12951   1575  -3508    832       N  
ATOM   1879  CA  GLU A 283     -24.939  17.579   7.926  1.00109.47           C  
ANISOU 1879  CA  GLU A 283    14176  13917  13501   1247  -3494    638       C  
ATOM   1880  C   GLU A 283     -24.886  16.167   8.525  1.00110.33           C  
ANISOU 1880  C   GLU A 283    13970  14046  13903    950  -3018    463       C  
ATOM   1881  O   GLU A 283     -24.976  15.169   7.805  1.00112.30           O  
ANISOU 1881  O   GLU A 283    14144  14389  14137    601  -2891    266       O  
ATOM   1882  CB  GLU A 283     -24.009  17.657   6.708  1.00108.89           C  
ANISOU 1882  CB  GLU A 283    14572  13715  13086   1021  -3540    747       C  
ATOM   1883  N   MET A 284     -24.729  16.094   9.843  1.00108.76           N  
ANISOU 1883  N   MET A 284    13625  13744  13954   1100  -2732    537       N  
ATOM   1884  CA  MET A 284     -24.735  14.831  10.571  1.00104.33           C  
ANISOU 1884  CA  MET A 284    12769  13182  13691    918  -2230    448       C  
ATOM   1885  C   MET A 284     -25.371  15.058  11.949  1.00102.44           C  
ANISOU 1885  C   MET A 284    12226  13013  13684   1256  -2118    477       C  
ATOM   1886  O   MET A 284     -25.979  14.157  12.528  1.00102.48           O  
ANISOU 1886  O   MET A 284    11855  13105  13976   1202  -1784    373       O  
ATOM   1887  CB  MET A 284     -23.317  14.244  10.677  1.00 99.66           C  
ANISOU 1887  CB  MET A 284    12448  12346  13072    706  -1823    614       C  
ATOM   1888  CG  MET A 284     -22.274  15.106  11.368  1.00 96.73           C  
ANISOU 1888  CG  MET A 284    12346  11817  12592    904  -1848    874       C  
ATOM   1889  SD  MET A 284     -20.598  14.425  11.263  1.00104.48           S  
ANISOU 1889  SD  MET A 284    13566  12598  13532    648  -1427   1092       S  
ATOM   1890  CE  MET A 284     -20.150  14.913   9.617  1.00107.65           C  
ANISOU 1890  CE  MET A 284    14375  12895  13634    427  -1703   1100       C  
ATOM   1891  N   ASN A 285     -25.209  16.278  12.455  1.00100.87           N  
ANISOU 1891  N   ASN A 285    12225  12742  13357   1599  -2362    615       N  
ATOM   1892  CA  ASN A 285     -25.567  16.659  13.822  1.00 99.00           C  
ANISOU 1892  CA  ASN A 285    11838  12529  13247   1955  -2242    655       C  
ATOM   1893  C   ASN A 285     -27.028  16.827  14.186  1.00117.33           C  
ANISOU 1893  C   ASN A 285    13748  15072  15762   2236  -2331    531       C  
ATOM   1894  O   ASN A 285     -27.750  17.618  13.556  1.00122.92           O  
ANISOU 1894  O   ASN A 285    14429  15879  16395   2416  -2740    492       O  
ATOM   1895  CB  ASN A 285     -24.896  17.976  14.179  1.00 92.64           C  
ANISOU 1895  CB  ASN A 285    11434  11532  12232   2193  -2476    781       C  
ATOM   1896  N   PRO A 286     -27.462  16.101  15.231  1.00123.98           N  
ANISOU 1896  N   PRO A 286    14255  16000  16852   2314  -1921    508       N  
ATOM   1897  CA  PRO A 286     -28.630  16.491  16.033  1.00131.92           C  
ANISOU 1897  CA  PRO A 286    14928  17165  18029   2703  -1906    462       C  
ATOM   1898  C   PRO A 286     -28.335  17.770  16.823  1.00126.68           C  
ANISOU 1898  C   PRO A 286    14601  16368  17163   3126  -2056    555       C  
ATOM   1899  O   PRO A 286     -28.464  17.775  18.050  1.00127.76           O  
ANISOU 1899  O   PRO A 286    14675  16526  17344   3391  -1769    585       O  
ATOM   1900  CB  PRO A 286     -28.828  15.294  16.972  1.00131.88           C  
ANISOU 1900  CB  PRO A 286    14597  17213  18298   2633  -1317    473       C  
ATOM   1901  CG  PRO A 286     -27.488  14.652  17.042  1.00123.44           C  
ANISOU 1901  CG  PRO A 286    13831  15963  17107   2377  -1048    603       C  
ATOM   1902  CD  PRO A 286     -26.900  14.813  15.674  1.00120.71           C  
ANISOU 1902  CD  PRO A 286    13754  15527  16584   2059  -1389    556       C  
ATOM   1903  N   ASN A 287     -27.961  18.834  16.115  1.00118.65           N  
ANISOU 1903  N   ASN A 287    13960  15202  15921   3184  -2474    591       N  
ATOM   1904  CA  ASN A 287     -27.223  19.941  16.709  1.00114.93           C  
ANISOU 1904  CA  ASN A 287    13946  14483  15238   3400  -2573    652       C  
ATOM   1905  C   ASN A 287     -26.155  19.465  17.726  1.00111.17           C  
ANISOU 1905  C   ASN A 287    13608  13955  14678   3284  -2241    700       C  
ATOM   1906  O   ASN A 287     -26.364  19.495  18.947  1.00107.65           O  
ANISOU 1906  O   ASN A 287    13091  13578  14232   3552  -2013    676       O  
ATOM   1907  CB  ASN A 287     -28.185  20.932  17.366  1.00112.33           C  
ANISOU 1907  CB  ASN A 287    13576  14152  14953   3917  -2658    605       C  
ATOM   1908  N   TYR A 288     -25.012  19.026  17.201  1.00110.46           N  
ANISOU 1908  N   TYR A 288    13705  13775  14490   2911  -2214    785       N  
ATOM   1909  CA  TYR A 288     -23.799  18.898  17.995  1.00108.74           C  
ANISOU 1909  CA  TYR A 288    13675  13513  14127   2826  -2035    867       C  
ATOM   1910  C   TYR A 288     -22.918  20.085  17.639  1.00114.11           C  
ANISOU 1910  C   TYR A 288    14803  13942  14613   2751  -2363    871       C  
ATOM   1911  O   TYR A 288     -21.698  20.071  17.822  1.00119.82           O  
ANISOU 1911  O   TYR A 288    15697  14612  15216   2542  -2326    944       O  
ATOM   1912  CB  TYR A 288     -23.072  17.582  17.710  1.00102.08           C  
ANISOU 1912  CB  TYR A 288    12699  12737  13349   2491  -1718    995       C  
ATOM   1913  CG  TYR A 288     -23.495  16.419  18.578  1.00 97.99           C  
ANISOU 1913  CG  TYR A 288    11831  12405  12996   2586  -1245   1046       C  
ATOM   1914  CD1 TYR A 288     -24.832  16.089  18.729  1.00 96.95           C  
ANISOU 1914  CD1 TYR A 288    11360  12384  13091   2738  -1118    946       C  
ATOM   1915  CD2 TYR A 288     -22.548  15.626  19.218  1.00 95.20           C  
ANISOU 1915  CD2 TYR A 288    11463  12118  12589   2530   -895   1229       C  
ATOM   1916  CE1 TYR A 288     -25.220  15.018  19.516  1.00 92.39           C  
ANISOU 1916  CE1 TYR A 288    10474  11929  12703   2809   -616   1018       C  
ATOM   1917  CE2 TYR A 288     -22.930  14.549  20.002  1.00 93.90           C  
ANISOU 1917  CE2 TYR A 288    11014  12085  12578   2653   -400   1333       C  
ATOM   1918  CZ  TYR A 288     -24.271  14.252  20.148  1.00 90.75           C  
ANISOU 1918  CZ  TYR A 288    10315  11742  12424   2777   -243   1223       C  
ATOM   1919  OH  TYR A 288     -24.668  13.183  20.920  1.00 89.12           O  
ANISOU 1919  OH  TYR A 288     9834  11620  12408   2884    312   1346       O  
ATOM   1920  N   THR A 289     -23.577  21.124  17.141  1.00113.79           N  
ANISOU 1920  N   THR A 289    14923  13745  14566   2939  -2664    806       N  
ATOM   1921  CA  THR A 289     -22.990  22.441  16.993  1.00109.89           C  
ANISOU 1921  CA  THR A 289    14880  12935  13938   2958  -2921    790       C  
ATOM   1922  C   THR A 289     -22.915  22.986  18.416  1.00106.10           C  
ANISOU 1922  C   THR A 289    14499  12439  13376   3199  -2839    643       C  
ATOM   1923  O   THR A 289     -23.545  22.420  19.315  1.00108.60           O  
ANISOU 1923  O   THR A 289    14533  13000  13731   3425  -2615    593       O  
ATOM   1924  CB  THR A 289     -23.822  23.347  16.038  1.00102.01           C  
ANISOU 1924  CB  THR A 289    14028  11767  12963   3170  -3212    817       C  
ATOM   1925  OG1 THR A 289     -25.223  23.196  16.309  1.00 99.66           O  
ANISOU 1925  OG1 THR A 289    13385  11684  12799   3533  -3191    755       O  
ATOM   1926  CG2 THR A 289     -23.575  22.958  14.584  1.00101.42           C  
ANISOU 1926  CG2 THR A 289    13985  11701  12848   2882  -3337    956       C  
ATOM   1927  N   GLU A 290     -22.135  24.048  18.619  1.00103.06           N  
ANISOU 1927  N   GLU A 290    14518  11769  12872   3129  -2993    560       N  
ATOM   1928  CA  GLU A 290     -21.953  24.697  19.933  1.00105.18           C  
ANISOU 1928  CA  GLU A 290    14962  11999  13001   3303  -2959    345       C  
ATOM   1929  C   GLU A 290     -21.046  23.873  20.876  1.00105.67           C  
ANISOU 1929  C   GLU A 290    14852  12388  12908   3130  -2789    343       C  
ATOM   1930  O   GLU A 290     -20.501  24.416  21.841  1.00106.17           O  
ANISOU 1930  O   GLU A 290    15101  12460  12779   3140  -2833    153       O  
ATOM   1931  CB  GLU A 290     -23.303  24.986  20.616  1.00 99.93           C  
ANISOU 1931  CB  GLU A 290    14204  11386  12380   3815  -2866    227       C  
ATOM   1932  N   PHE A 291     -20.882  22.577  20.598  1.00103.47           N  
ANISOU 1932  N   PHE A 291    14231  12383  12699   2984  -2592    548       N  
ATOM   1933  CA  PHE A 291     -20.024  21.713  21.416  1.00 99.05           C  
ANISOU 1933  CA  PHE A 291    13485  12149  12001   2884  -2393    635       C  
ATOM   1934  C   PHE A 291     -18.551  22.015  21.163  1.00 97.44           C  
ANISOU 1934  C   PHE A 291    13439  11882  11703   2495  -2554    670       C  
ATOM   1935  O   PHE A 291     -18.194  22.666  20.181  1.00101.06           O  
ANISOU 1935  O   PHE A 291    14123  12024  12251   2252  -2746    676       O  
ATOM   1936  CB  PHE A 291     -20.282  20.228  21.142  1.00 98.73           C  
ANISOU 1936  CB  PHE A 291    13064  12337  12113   2854  -2060    866       C  
ATOM   1937  CG  PHE A 291     -21.464  19.663  21.876  1.00101.55           C  
ANISOU 1937  CG  PHE A 291    13160  12882  12541   3212  -1781    854       C  
ATOM   1938  CD1 PHE A 291     -21.743  20.050  23.174  1.00105.64           C  
ANISOU 1938  CD1 PHE A 291    13731  13549  12860   3551  -1715    731       C  
ATOM   1939  CD2 PHE A 291     -22.297  18.740  21.262  1.00101.52           C  
ANISOU 1939  CD2 PHE A 291    12857  12911  12804   3189  -1563    947       C  
ATOM   1940  CE1 PHE A 291     -22.833  19.527  23.844  1.00107.12           C  
ANISOU 1940  CE1 PHE A 291    13671  13902  13127   3893  -1398    751       C  
ATOM   1941  CE2 PHE A 291     -23.388  18.215  21.923  1.00 99.26           C  
ANISOU 1941  CE2 PHE A 291    12289  12783  12641   3480  -1267    942       C  
ATOM   1942  CZ  PHE A 291     -23.657  18.608  23.215  1.00103.99           C  
ANISOU 1942  CZ  PHE A 291    12937  13519  13056   3849  -1164    869       C  
ATOM   1943  N   LYS A 292     -17.699  21.522  22.052  1.00 94.21           N  
ANISOU 1943  N   LYS A 292    12883  11803  11111   2456  -2459    722       N  
ATOM   1944  CA  LYS A 292     -16.271  21.785  21.974  1.00 92.22           C  
ANISOU 1944  CA  LYS A 292    12682  11585  10774   2097  -2616    749       C  
ATOM   1945  C   LYS A 292     -15.559  20.641  21.263  1.00 93.41           C  
ANISOU 1945  C   LYS A 292    12572  11869  11053   1884  -2396   1089       C  
ATOM   1946  O   LYS A 292     -15.462  19.537  21.785  1.00 84.72           O  
ANISOU 1946  O   LYS A 292    11185  11100   9906   2035  -2112   1290       O  
ATOM   1947  CB  LYS A 292     -15.689  21.993  23.370  1.00 89.03           C  
ANISOU 1947  CB  LYS A 292    12244  11534  10048   2186  -2699    594       C  
ATOM   1948  N   PHE A 293     -15.101  20.890  20.043  1.00 94.24           N  
ANISOU 1948  N   PHE A 293    13739  12171   9897   -128     13  -1306       N  
ATOM   1949  CA  PHE A 293     -14.323  19.878  19.338  1.00 95.68           C  
ANISOU 1949  CA  PHE A 293    13711  12525  10116   -238    -43  -1179       C  
ATOM   1950  C   PHE A 293     -12.864  20.277  19.266  1.00 97.61           C  
ANISOU 1950  C   PHE A 293    13917  12791  10379   -546    -73  -1353       C  
ATOM   1951  O   PHE A 293     -12.548  21.448  19.022  1.00 98.07           O  
ANISOU 1951  O   PHE A 293    14170  12595  10497   -721     -3  -1483       O  
ATOM   1952  CB  PHE A 293     -14.881  19.632  17.937  1.00 90.15           C  
ANISOU 1952  CB  PHE A 293    13037  11679   9539   -170      4   -950       C  
ATOM   1953  CG  PHE A 293     -16.240  19.019  17.942  1.00 90.84           C  
ANISOU 1953  CG  PHE A 293    13079  11815   9619    114     19   -794       C  
ATOM   1954  CD1 PHE A 293     -16.389  17.649  18.068  1.00 93.44           C  
ANISOU 1954  CD1 PHE A 293    13187  12403   9913    200    -24   -666       C  
ATOM   1955  CD2 PHE A 293     -17.371  19.810  17.857  1.00 93.03           C  
ANISOU 1955  CD2 PHE A 293    13536  11884   9928    297     81   -793       C  
ATOM   1956  CE1 PHE A 293     -17.645  17.075  18.086  1.00 96.74           C  
ANISOU 1956  CE1 PHE A 293    13550  12872  10335    423     12   -546       C  
ATOM   1957  CE2 PHE A 293     -18.628  19.247  17.872  1.00 96.70           C  
ANISOU 1957  CE2 PHE A 293    13918  12429  10396    546    100   -683       C  
ATOM   1958  CZ  PHE A 293     -18.768  17.876  17.986  1.00 98.84           C  
ANISOU 1958  CZ  PHE A 293    13955  12962  10640    590     74   -564       C  
ATOM   1959  N   PRO A 294     -11.968  19.298  19.478  1.00 96.87           N  
ANISOU 1959  N   PRO A 294    13573  12999  10236   -613   -173  -1364       N  
ATOM   1960  CA  PRO A 294     -10.538  19.572  19.339  1.00 96.81           C  
ANISOU 1960  CA  PRO A 294    13462  13066  10257   -907   -207  -1547       C  
ATOM   1961  C   PRO A 294     -10.249  20.121  17.953  1.00104.36           C  
ANISOU 1961  C   PRO A 294    14520  13767  11364  -1103    -93  -1479       C  
ATOM   1962  O   PRO A 294     -10.604  19.502  16.945  1.00 98.66           O  
ANISOU 1962  O   PRO A 294    13765  13016  10707  -1021    -66  -1252       O  
ATOM   1963  CB  PRO A 294      -9.891  18.197  19.556  1.00 86.24           C  
ANISOU 1963  CB  PRO A 294    11828  12089   8849   -846   -338  -1496       C  
ATOM   1964  CG  PRO A 294     -10.978  17.211  19.275  1.00 81.76           C  
ANISOU 1964  CG  PRO A 294    11248  11541   8275   -579   -326  -1220       C  
ATOM   1965  CD  PRO A 294     -12.229  17.877  19.772  1.00 88.97           C  
ANISOU 1965  CD  PRO A 294    12376  12272   9157   -420   -252  -1208       C  
ATOM   1966  N   GLN A 295      -9.624  21.295  17.914  1.00115.14           N  
ANISOU 1966  N   GLN A 295    16030  14941  12777  -1369    -17  -1681       N  
ATOM   1967  CA  GLN A 295      -9.356  21.947  16.646  1.00119.27           C  
ANISOU 1967  CA  GLN A 295    16715  15180  13422  -1577    123  -1618       C  
ATOM   1968  C   GLN A 295      -8.057  21.419  16.074  1.00118.53           C  
ANISOU 1968  C   GLN A 295    16366  15294  13375  -1830    114  -1676       C  
ATOM   1969  O   GLN A 295      -6.999  21.534  16.687  1.00121.62           O  
ANISOU 1969  O   GLN A 295    16584  15878  13748  -2040     65  -1933       O  
ATOM   1970  CB  GLN A 295      -9.309  23.480  16.801  1.00124.26           C  
ANISOU 1970  CB  GLN A 295    17666  15459  14088  -1766    243  -1798       C  
ATOM   1971  CG  GLN A 295     -10.582  24.102  17.349  1.00125.81           C  
ANISOU 1971  CG  GLN A 295    18126  15433  14244  -1500    258  -1768       C  
ATOM   1972  CD  GLN A 295     -11.537  24.453  16.219  1.00128.29           C  
ANISOU 1972  CD  GLN A 295    18707  15415  14621  -1343    354  -1520       C  
ATOM   1973  OE1 GLN A 295     -11.108  24.728  15.091  1.00127.07           O  
ANISOU 1973  OE1 GLN A 295    18666  15078  14536  -1523    453  -1430       O  
ATOM   1974  NE2 GLN A 295     -12.832  24.389  16.494  1.00128.84           N  
ANISOU 1974  NE2 GLN A 295    18864  15434  14655   -998    323  -1408       N  
ATOM   1975  N   ILE A 296      -8.154  20.858  14.872  1.00116.66           N  
ANISOU 1975  N   ILE A 296    16100  15026  13198  -1803    163  -1452       N  
ATOM   1976  CA  ILE A 296      -7.015  20.264  14.186  1.00115.12           C  
ANISOU 1976  CA  ILE A 296    15657  15032  13051  -2010    170  -1482       C  
ATOM   1977  C   ILE A 296      -7.231  20.449  12.688  1.00111.54           C  
ANISOU 1977  C   ILE A 296    15379  14330  12669  -2076    317  -1275       C  
ATOM   1978  O   ILE A 296      -8.332  20.220  12.173  1.00103.08           O  
ANISOU 1978  O   ILE A 296    14456  13120  11591  -1824    319  -1034       O  
ATOM   1979  CB  ILE A 296      -6.851  18.749  14.530  1.00 93.14           C  
ANISOU 1979  CB  ILE A 296    12533  12643  10213  -1800      2  -1415       C  
ATOM   1980  CG1 ILE A 296      -6.347  18.563  15.968  1.00 99.43           C  
ANISOU 1980  CG1 ILE A 296    13147  13720  10910  -1769   -149  -1645       C  
ATOM   1981  CG2 ILE A 296      -5.893  18.064  13.568  1.00 90.87           C  
ANISOU 1981  CG2 ILE A 296    12016  12523   9986  -1948     24  -1394       C  
ATOM   1982  CD1 ILE A 296      -6.816  17.280  16.644  1.00 97.67           C  
ANISOU 1982  CD1 ILE A 296    12769  13759  10583  -1438   -306  -1516       C  
ATOM   1983  N   LYS A 297      -6.177  20.856  11.990  1.00116.73           N  
ANISOU 1983  N   LYS A 297    16016  14950  13388  -2419    443  -1381       N  
ATOM   1984  CA  LYS A 297      -6.266  21.049  10.556  1.00120.88           C  
ANISOU 1984  CA  LYS A 297    16725  15249  13953  -2507    598  -1191       C  
ATOM   1985  C   LYS A 297      -6.117  19.695   9.868  1.00122.04           C  
ANISOU 1985  C   LYS A 297    16597  15670  14101  -2379    529  -1039       C  
ATOM   1986  O   LYS A 297      -5.459  18.794  10.393  1.00126.49           O  
ANISOU 1986  O   LYS A 297    16811  16591  14660  -2359    406  -1149       O  
ATOM   1987  CB  LYS A 297      -5.196  22.033  10.078  1.00122.38           C  
ANISOU 1987  CB  LYS A 297    17022  15277  14198  -2954    797  -1368       C  
ATOM   1988  N   ALA A 298      -6.727  19.560   8.694  1.00118.23           N  
ANISOU 1988  N   ALA A 298    16287  15019  13617  -2278    600   -793       N  
ATOM   1989  CA  ALA A 298      -6.753  18.288   7.977  1.00115.68           C  
ANISOU 1989  CA  ALA A 298    15743  14917  13291  -2131    538   -637       C  
ATOM   1990  C   ALA A 298      -5.343  17.777   7.663  1.00115.36           C  
ANISOU 1990  C   ALA A 298    15394  15148  13289  -2387    576   -790       C  
ATOM   1991  O   ALA A 298      -4.642  18.342   6.815  1.00120.16           O  
ANISOU 1991  O   ALA A 298    16088  15645  13921  -2681    754   -833       O  
ATOM   1992  CB  ALA A 298      -7.567  18.423   6.691  1.00114.26           C  
ANISOU 1992  CB  ALA A 298    15834  14491  13090  -2021    621   -382       C  
ATOM   1993  N   HIS A 299      -4.927  16.718   8.360  1.00104.28           N  
ANISOU 1993  N   HIS A 299    13640  14098  11883  -2268    415   -877       N  
ATOM   1994  CA  HIS A 299      -3.647  16.073   8.078  1.00104.10           C  
ANISOU 1994  CA  HIS A 299    13280  14377  11895  -2435    418  -1025       C  
ATOM   1995  C   HIS A 299      -3.623  15.528   6.641  1.00116.76           C  
ANISOU 1995  C   HIS A 299    14889  15962  13513  -2442    518   -852       C  
ATOM   1996  O   HIS A 299      -4.613  14.953   6.172  1.00115.58           O  
ANISOU 1996  O   HIS A 299    14844  15735  13337  -2181    469   -617       O  
ATOM   1997  CB  HIS A 299      -3.378  14.945   9.076  1.00 89.23           C  
ANISOU 1997  CB  HIS A 299    11068  12851   9983  -2214    199  -1107       C  
ATOM   1998  N   PRO A 300      -2.497  15.730   5.928  1.00125.13           N  
ANISOU 1998  N   PRO A 300    15831  17100  14610  -2753    667   -986       N  
ATOM   1999  CA  PRO A 300      -2.370  15.240   4.548  1.00122.33           C  
ANISOU 1999  CA  PRO A 300    15480  16748  14252  -2782    781   -846       C  
ATOM   2000  C   PRO A 300      -2.561  13.732   4.481  1.00114.76           C  
ANISOU 2000  C   PRO A 300    14266  16047  13289  -2473    613   -751       C  
ATOM   2001  O   PRO A 300      -1.887  12.990   5.199  1.00117.47           O  
ANISOU 2001  O   PRO A 300    14281  16698  13655  -2406    478   -908       O  
ATOM   2002  CB  PRO A 300      -0.938  15.630   4.158  1.00127.71           C  
ANISOU 2002  CB  PRO A 300    15980  17563  14981  -3183    955  -1088       C  
ATOM   2003  CG  PRO A 300      -0.568  16.730   5.098  1.00132.92           C  
ANISOU 2003  CG  PRO A 300    16697  18138  15670  -3418    989  -1309       C  
ATOM   2004  CD  PRO A 300      -1.278  16.419   6.385  1.00131.50           C  
ANISOU 2004  CD  PRO A 300    16482  18019  15464  -3105    746  -1298       C  
ATOM   2005  N   TRP A 301      -3.467  13.292   3.616  1.00107.10           N  
ANISOU 2005  N   TRP A 301    13461  14949  12285  -2282    618   -505       N  
ATOM   2006  CA  TRP A 301      -3.829  11.881   3.529  1.00 98.22           C  
ANISOU 2006  CA  TRP A 301    12150  14009  11159  -1987    470   -399       C  
ATOM   2007  C   TRP A 301      -2.649  11.004   3.110  1.00101.52           C  
ANISOU 2007  C   TRP A 301    12232  14729  11611  -2061    480   -535       C  
ATOM   2008  O   TRP A 301      -2.596   9.818   3.449  1.00103.38           O  
ANISOU 2008  O   TRP A 301    12247  15174  11859  -1833    330   -535       O  
ATOM   2009  CB  TRP A 301      -4.979  11.689   2.545  1.00 86.39           C  
ANISOU 2009  CB  TRP A 301    10892  12314   9620  -1816    493   -144       C  
ATOM   2010  CG  TRP A 301      -6.353  11.704   3.144  1.00 78.35           C  
ANISOU 2010  CG  TRP A 301    10039  11149   8583  -1551    375      0       C  
ATOM   2011  CD1 TRP A 301      -7.227  12.748   3.143  1.00 80.68           C  
ANISOU 2011  CD1 TRP A 301    10647  11163   8845  -1531    418     90       C  
ATOM   2012  CD2 TRP A 301      -7.029  10.615   3.790  1.00 72.86           C  
ANISOU 2012  CD2 TRP A 301     9208  10578   7899  -1267    211     65       C  
ATOM   2013  NE1 TRP A 301      -8.402  12.384   3.762  1.00 81.11           N  
ANISOU 2013  NE1 TRP A 301    10733  11188   8895  -1252    289    189       N  
ATOM   2014  CE2 TRP A 301      -8.305  11.080   4.165  1.00 72.59           C  
ANISOU 2014  CE2 TRP A 301     9387  10351   7843  -1106    172    179       C  
ATOM   2015  CE3 TRP A 301      -6.680   9.298   4.088  1.00 72.61           C  
ANISOU 2015  CE3 TRP A 301     8910  10789   7891  -1132    103     36       C  
ATOM   2016  CZ2 TRP A 301      -9.228  10.277   4.823  1.00 69.63           C  
ANISOU 2016  CZ2 TRP A 301     8951  10033   7473   -852     51    255       C  
ATOM   2017  CZ3 TRP A 301      -7.603   8.500   4.741  1.00 71.42           C  
ANISOU 2017  CZ3 TRP A 301     8740  10658   7736   -875    -19    132       C  
ATOM   2018  CH2 TRP A 301      -8.860   8.994   5.101  1.00 69.62           C  
ANISOU 2018  CH2 TRP A 301     8712  10250   7490   -755    -34    237       C  
ATOM   2019  N   THR A 302      -1.706  11.585   2.372  1.00 99.89           N  
ANISOU 2019  N   THR A 302    11999  14538  11417  -2377    669   -655       N  
ATOM   2020  CA  THR A 302      -0.554  10.827   1.901  1.00100.64           C  
ANISOU 2020  CA  THR A 302    11760  14933  11548  -2459    703   -810       C  
ATOM   2021  C   THR A 302       0.336  10.446   3.085  1.00101.63           C  
ANISOU 2021  C   THR A 302    11527  15368  11718  -2429    549  -1061       C  
ATOM   2022  O   THR A 302       1.032   9.432   3.035  1.00102.72           O  
ANISOU 2022  O   THR A 302    11354  15794  11882  -2317    468  -1163       O  
ATOM   2023  CB  THR A 302       0.271  11.616   0.858  1.00 98.31           C  
ANISOU 2023  CB  THR A 302    11515  14588  11249  -2844    976   -900       C  
ATOM   2024  N   LYS A 303       0.303  11.259   4.143  1.00 98.86           N  
ANISOU 2024  N   LYS A 303    11234  14959  11368  -2508    499  -1167       N  
ATOM   2025  CA  LYS A 303       1.105  11.021   5.346  1.00 91.18           C  
ANISOU 2025  CA  LYS A 303     9950  14282  10412  -2472    334  -1418       C  
ATOM   2026  C   LYS A 303       0.542   9.930   6.265  1.00 82.53           C  
ANISOU 2026  C   LYS A 303     8784  13302   9272  -2061     76  -1319       C  
ATOM   2027  O   LYS A 303       1.232   9.457   7.160  1.00 86.49           O  
ANISOU 2027  O   LYS A 303     9017  14083   9760  -1954    -90  -1500       O  
ATOM   2028  CB  LYS A 303       1.255  12.321   6.136  1.00 92.16           C  
ANISOU 2028  CB  LYS A 303    10182  14294  10540  -2718    379  -1582       C  
ATOM   2029  N   VAL A 304      -0.694   9.510   6.012  1.00 76.94           N  
ANISOU 2029  N   VAL A 304     8316  12384   8533  -1831     49  -1037       N  
ATOM   2030  CA  VAL A 304      -1.381   8.484   6.807  1.00 70.31           C  
ANISOU 2030  CA  VAL A 304     7468  11598   7648  -1468   -150   -910       C  
ATOM   2031  C   VAL A 304      -0.902   7.045   6.548  1.00 75.49           C  
ANISOU 2031  C   VAL A 304     7882  12486   8314  -1252   -251   -908       C  
ATOM   2032  O   VAL A 304      -0.903   6.218   7.463  1.00 73.39           O  
ANISOU 2032  O   VAL A 304     7524  12359   8004   -994   -431   -910       O  
ATOM   2033  CB  VAL A 304      -2.909   8.570   6.561  1.00 66.97           C  
ANISOU 2033  CB  VAL A 304     7369  10873   7202  -1330   -119   -634       C  
ATOM   2034  CG1 VAL A 304      -3.655   7.308   7.007  1.00 54.45           C  
ANISOU 2034  CG1 VAL A 304     5774   9328   5587   -990   -265   -477       C  
ATOM   2035  CG2 VAL A 304      -3.478   9.822   7.205  1.00 65.98           C  
ANISOU 2035  CG2 VAL A 304     7475  10541   7052  -1432    -81   -643       C  
ATOM   2036  N   PHE A 305      -0.511   6.739   5.307  1.00 77.77           N  
ANISOU 2036  N   PHE A 305     8097  12803   8649  -1343   -131   -900       N  
ATOM   2037  CA  PHE A 305      -0.159   5.365   4.914  1.00 71.21           C  
ANISOU 2037  CA  PHE A 305     7075  12149   7835  -1126   -209   -887       C  
ATOM   2038  C   PHE A 305       1.350   5.154   4.702  1.00 73.52           C  
ANISOU 2038  C   PHE A 305     7007  12761   8166  -1230   -201  -1160       C  
ATOM   2039  O   PHE A 305       2.113   6.116   4.690  1.00 80.91           O  
ANISOU 2039  O   PHE A 305     7840  13774   9126  -1525    -99  -1359       O  
ATOM   2040  CB  PHE A 305      -0.932   4.992   3.645  1.00 69.13           C  
ANISOU 2040  CB  PHE A 305     6984  11698   7584  -1099    -96   -679       C  
ATOM   2041  CG  PHE A 305      -2.426   5.072   3.800  1.00 58.04           C  
ANISOU 2041  CG  PHE A 305     5880  10023   6150   -969   -118   -436       C  
ATOM   2042  CD1 PHE A 305      -3.144   4.001   4.313  1.00 59.32           C  
ANISOU 2042  CD1 PHE A 305     6072  10168   6299   -678   -252   -306       C  
ATOM   2043  CD2 PHE A 305      -3.113   6.224   3.444  1.00 58.67           C  
ANISOU 2043  CD2 PHE A 305     6215   9862   6213  -1135      2   -347       C  
ATOM   2044  CE1 PHE A 305      -4.533   4.077   4.452  1.00 66.40           C  
ANISOU 2044  CE1 PHE A 305     7209  10842   7178   -578   -256   -111       C  
ATOM   2045  CE2 PHE A 305      -4.508   6.303   3.568  1.00 58.05           C  
ANISOU 2045  CE2 PHE A 305     6382   9562   6112   -994    -26   -147       C  
ATOM   2046  CZ  PHE A 305      -5.215   5.230   4.070  1.00 57.82           C  
ANISOU 2046  CZ  PHE A 305     6339   9549   6082   -727   -151    -40       C  
ATOM   2047  N   ARG A 306       1.788   3.900   4.561  1.00 75.72           N  
ANISOU 2047  N   ARG A 306     7088  13228   8455   -989   -304  -1188       N  
ATOM   2048  CA  ARG A 306       3.173   3.613   4.137  1.00 77.37           C  
ANISOU 2048  CA  ARG A 306     6936  13750   8710  -1064   -278  -1449       C  
ATOM   2049  C   ARG A 306       3.516   4.415   2.881  1.00 84.62           C  
ANISOU 2049  C   ARG A 306     7865  14615   9670  -1431     -8  -1504       C  
ATOM   2050  O   ARG A 306       2.627   4.748   2.089  1.00 82.90           O  
ANISOU 2050  O   ARG A 306     7943  14121   9435  -1518    129  -1290       O  
ATOM   2051  CB  ARG A 306       3.385   2.128   3.789  1.00 81.14           C  
ANISOU 2051  CB  ARG A 306     7277  14353   9198   -745   -378  -1419       C  
ATOM   2052  CG  ARG A 306       3.360   1.104   4.890  1.00 84.42           C  
ANISOU 2052  CG  ARG A 306     7644  14868   9565   -356   -634  -1397       C  
ATOM   2053  CD  ARG A 306       3.226  -0.294   4.265  1.00 78.66           C  
ANISOU 2053  CD  ARG A 306     6913  14120   8853    -76   -672  -1292       C  
ATOM   2054  N   PRO A 307       4.802   4.729   2.684  1.00 87.05           N  
ANISOU 2054  N   PRO A 307     7856  15197  10024  -1648     74  -1797       N  
ATOM   2055  CA  PRO A 307       5.208   5.390   1.440  1.00 84.28           C  
ANISOU 2055  CA  PRO A 307     7516  14808   9699  -2006    362  -1852       C  
ATOM   2056  C   PRO A 307       5.031   4.502   0.200  1.00 91.93           C  
ANISOU 2056  C   PRO A 307     8515  15754  10660  -1890    448  -1727       C  
ATOM   2057  O   PRO A 307       4.859   5.018  -0.910  1.00 86.70           O  
ANISOU 2057  O   PRO A 307     8028  14941   9973  -2127    682  -1644       O  
ATOM   2058  CB  PRO A 307       6.681   5.697   1.684  1.00 82.13           C  
ANISOU 2058  CB  PRO A 307     6824  14899   9485  -2219    400  -2234       C  
ATOM   2059  CG  PRO A 307       6.772   5.851   3.156  1.00 84.65           C  
ANISOU 2059  CG  PRO A 307     7048  15323   9791  -2091    164  -2346       C  
ATOM   2060  CD  PRO A 307       5.840   4.828   3.723  1.00 84.50           C  
ANISOU 2060  CD  PRO A 307     7195  15194   9715  -1642    -72  -2098       C  
ATOM   2061  N   ARG A 308       5.042   3.185   0.391  1.00100.37           N  
ANISOU 2061  N   ARG A 308     9446  16953  11736  -1521    263  -1707       N  
ATOM   2062  CA  ARG A 308       4.815   2.246  -0.712  1.00105.23           C  
ANISOU 2062  CA  ARG A 308    10100  17536  12346  -1379    322  -1598       C  
ATOM   2063  C   ARG A 308       3.370   2.276  -1.273  1.00100.27           C  
ANISOU 2063  C   ARG A 308     9888  16545  11665  -1331    366  -1269       C  
ATOM   2064  O   ARG A 308       3.114   1.811  -2.387  1.00 98.11           O  
ANISOU 2064  O   ARG A 308     9697  16211  11370  -1310    466  -1181       O  
ATOM   2065  CB  ARG A 308       5.169   0.823  -0.254  1.00107.43           C  
ANISOU 2065  CB  ARG A 308    10158  18012  12650   -977    101  -1664       C  
ATOM   2066  N   THR A 309       2.445   2.825  -0.488  1.00 93.99           N  
ANISOU 2066  N   THR A 309     9336  15530  10845  -1307    284  -1111       N  
ATOM   2067  CA  THR A 309       1.006   2.831  -0.778  1.00 80.33           C  
ANISOU 2067  CA  THR A 309     7963  13487   9073  -1214    279   -824       C  
ATOM   2068  C   THR A 309       0.651   3.580  -2.058  1.00 81.91           C  
ANISOU 2068  C   THR A 309     8389  13511   9220  -1451    498   -722       C  
ATOM   2069  O   THR A 309       0.986   4.758  -2.186  1.00 84.01           O  
ANISOU 2069  O   THR A 309     8728  13724   9468  -1745    650   -780       O  
ATOM   2070  CB  THR A 309       0.243   3.471   0.389  1.00 73.30           C  
ANISOU 2070  CB  THR A 309     7247  12435   8166  -1180    172   -730       C  
ATOM   2071  OG1 THR A 309       0.598   2.808   1.611  1.00 72.75           O  
ANISOU 2071  OG1 THR A 309     6995  12534   8113   -957    -31   -820       O  
ATOM   2072  CG2 THR A 309      -1.253   3.409   0.170  1.00 65.59           C  
ANISOU 2072  CG2 THR A 309     6588  11175   7157  -1056    152   -464       C  
ATOM   2073  N   PRO A 310      -0.037   2.906  -3.003  1.00 80.51           N  
ANISOU 2073  N   PRO A 310     8345  13235   9010  -1322    516   -572       N  
ATOM   2074  CA  PRO A 310      -0.414   3.561  -4.266  1.00 84.30           C  
ANISOU 2074  CA  PRO A 310     9068  13557   9406  -1505    705   -462       C  
ATOM   2075  C   PRO A 310      -1.334   4.756  -4.037  1.00 82.92           C  
ANISOU 2075  C   PRO A 310     9219  13106   9181  -1604    734   -302       C  
ATOM   2076  O   PRO A 310      -2.251   4.683  -3.215  1.00 80.78           O  
ANISOU 2076  O   PRO A 310     9049  12713   8931  -1426    581   -191       O  
ATOM   2077  CB  PRO A 310      -1.122   2.450  -5.061  1.00 78.39           C  
ANISOU 2077  CB  PRO A 310     8381  12772   8634  -1276    648   -343       C  
ATOM   2078  CG  PRO A 310      -1.498   1.427  -4.043  1.00 80.44           C  
ANISOU 2078  CG  PRO A 310     8534  13059   8969   -986    429   -325       C  
ATOM   2079  CD  PRO A 310      -0.469   1.499  -2.962  1.00 76.05           C  
ANISOU 2079  CD  PRO A 310     7725  12699   8474  -1004    364   -508       C  
ATOM   2080  N   PRO A 311      -1.056   5.866  -4.735  1.00 79.21           N  
ANISOU 2080  N   PRO A 311     8919  12534   8643  -1889    941   -299       N  
ATOM   2081  CA  PRO A 311      -1.812   7.116  -4.624  1.00 75.96           C  
ANISOU 2081  CA  PRO A 311     8851  11837   8174  -1994    995   -159       C  
ATOM   2082  C   PRO A 311      -3.284   6.933  -4.946  1.00 75.57           C  
ANISOU 2082  C   PRO A 311     9067  11581   8066  -1752    887     75       C  
ATOM   2083  O   PRO A 311      -4.116   7.619  -4.352  1.00 79.17           O  
ANISOU 2083  O   PRO A 311     9723  11841   8516  -1697    822    177       O  
ATOM   2084  CB  PRO A 311      -1.122   8.042  -5.635  1.00 74.45           C  
ANISOU 2084  CB  PRO A 311     8799  11590   7899  -2330   1269   -195       C  
ATOM   2085  CG  PRO A 311      -0.185   7.179  -6.409  1.00 71.89           C  
ANISOU 2085  CG  PRO A 311     8208  11529   7576  -2372   1357   -331       C  
ATOM   2086  CD  PRO A 311       0.165   6.038  -5.534  1.00 73.60           C  
ANISOU 2086  CD  PRO A 311     8061  11992   7913  -2150   1155   -466       C  
ATOM   2087  N   GLU A 312      -3.598   6.008  -5.846  1.00 71.38           N  
ANISOU 2087  N   GLU A 312     8518  11108   7496  -1605    862    137       N  
ATOM   2088  CA  GLU A 312      -4.988   5.735  -6.205  1.00 68.04           C  
ANISOU 2088  CA  GLU A 312     8299  10532   7023  -1376    748    323       C  
ATOM   2089  C   GLU A 312      -5.745   5.139  -5.007  1.00 70.37           C  
ANISOU 2089  C   GLU A 312     8497  10822   7419  -1144    542    350       C  
ATOM   2090  O   GLU A 312      -6.954   5.354  -4.856  1.00 65.06           O  
ANISOU 2090  O   GLU A 312     8001   9992   6728  -1001    454    482       O  
ATOM   2091  CB  GLU A 312      -5.058   4.785  -7.409  1.00 66.43           C  
ANISOU 2091  CB  GLU A 312     8060  10421   6758  -1285    764    340       C  
ATOM   2092  CG  GLU A 312      -3.749   4.693  -8.209  1.00 75.48           C  
ANISOU 2092  CG  GLU A 312     9074  11740   7867  -1492    952    201       C  
ATOM   2093  N   ALA A 313      -5.035   4.371  -4.179  1.00 72.76           N  
ANISOU 2093  N   ALA A 313     8520  11307   7818  -1096    469    219       N  
ATOM   2094  CA  ALA A 313      -5.611   3.812  -2.957  1.00 71.19           C  
ANISOU 2094  CA  ALA A 313     8247  11107   7695   -897    298    242       C  
ATOM   2095  C   ALA A 313      -5.975   4.928  -1.996  1.00 67.58           C  
ANISOU 2095  C   ALA A 313     7925  10517   7236   -956    282    269       C  
ATOM   2096  O   ALA A 313      -7.082   4.968  -1.470  1.00 61.45           O  
ANISOU 2096  O   ALA A 313     7266   9617   6466   -810    192    376       O  
ATOM   2097  CB  ALA A 313      -4.646   2.839  -2.295  1.00 71.26           C  
ANISOU 2097  CB  ALA A 313     7964  11336   7777   -824    225     96       C  
ATOM   2098  N   ILE A 314      -5.030   5.840  -1.785  1.00 68.19           N  
ANISOU 2098  N   ILE A 314     7978  10624   7308  -1184    382    153       N  
ATOM   2099  CA  ILE A 314      -5.233   6.967  -0.880  1.00 68.90           C  
ANISOU 2099  CA  ILE A 314     8198  10584   7397  -1271    383    145       C  
ATOM   2100  C   ILE A 314      -6.363   7.894  -1.352  1.00 68.22           C  
ANISOU 2100  C   ILE A 314     8453  10223   7245  -1257    427    312       C  
ATOM   2101  O   ILE A 314      -7.225   8.286  -0.552  1.00 70.19           O  
ANISOU 2101  O   ILE A 314     8817  10349   7503  -1144    346    371       O  
ATOM   2102  CB  ILE A 314      -3.921   7.757  -0.697  1.00 64.81           C  
ANISOU 2102  CB  ILE A 314     7578  10154   6892  -1561    504    -44       C  
ATOM   2103  CG1 ILE A 314      -2.876   6.858  -0.026  1.00 60.84           C  
ANISOU 2103  CG1 ILE A 314     6713   9950   6453  -1515    412   -230       C  
ATOM   2104  CG2 ILE A 314      -4.162   9.032   0.102  1.00 55.66           C  
ANISOU 2104  CG2 ILE A 314     6603   8820   5727  -1679    527    -60       C  
ATOM   2105  CD1 ILE A 314      -1.471   7.449   0.019  1.00 59.80           C  
ANISOU 2105  CD1 ILE A 314     6394   9981   6347  -1804    529   -465       C  
ATOM   2106  N   ALA A 315      -6.369   8.207  -2.651  1.00 65.93           N  
ANISOU 2106  N   ALA A 315     8325   9849   6876  -1347    550    383       N  
ATOM   2107  CA  ALA A 315      -7.418   9.025  -3.283  1.00 60.16           C  
ANISOU 2107  CA  ALA A 315     7936   8866   6054  -1291    579    550       C  
ATOM   2108  C   ALA A 315      -8.800   8.415  -3.107  1.00 65.42           C  
ANISOU 2108  C   ALA A 315     8625   9497   6734   -992    412    665       C  
ATOM   2109  O   ALA A 315      -9.781   9.130  -2.900  1.00 70.04           O  
ANISOU 2109  O   ALA A 315     9420   9903   7290   -888    371    756       O  
ATOM   2110  CB  ALA A 315      -7.126   9.221  -4.765  1.00 55.96           C  
ANISOU 2110  CB  ALA A 315     7559   8294   5409  -1406    726    608       C  
ATOM   2111  N   LEU A 316      -8.891   7.097  -3.226  1.00 66.81           N  
ANISOU 2111  N   LEU A 316     8588   9842   6956   -857    325    650       N  
ATOM   2112  CA  LEU A 316     -10.165   6.424  -3.013  1.00 64.32           C  
ANISOU 2112  CA  LEU A 316     8260   9509   6670   -612    186    731       C  
ATOM   2113  C   LEU A 316     -10.614   6.582  -1.541  1.00 60.45           C  
ANISOU 2113  C   LEU A 316     7727   8990   6250   -531    103    713       C  
ATOM   2114  O   LEU A 316     -11.793   6.812  -1.268  1.00 62.46           O  
ANISOU 2114  O   LEU A 316     8084   9145   6505   -383     37    785       O  
ATOM   2115  CB  LEU A 316     -10.072   4.950  -3.420  1.00 59.71           C  
ANISOU 2115  CB  LEU A 316     7470   9088   6128   -517    133    701       C  
ATOM   2116  CG  LEU A 316     -11.351   4.129  -3.270  1.00 60.49           C  
ANISOU 2116  CG  LEU A 316     7536   9176   6270   -303     12    760       C  
ATOM   2117  CD1 LEU A 316     -12.502   4.800  -4.030  1.00 62.05           C  
ANISOU 2117  CD1 LEU A 316     7944   9245   6388   -214    -11    858       C  
ATOM   2118  CD2 LEU A 316     -11.136   2.686  -3.740  1.00 54.13           C  
ANISOU 2118  CD2 LEU A 316     6555   8503   5508   -242    -17    715       C  
ATOM   2119  N   CYS A 317      -9.683   6.446  -0.599  1.00 57.73           N  
ANISOU 2119  N   CYS A 317     7225   8755   5956   -617    102    603       N  
ATOM   2120  CA  CYS A 317     -10.006   6.600   0.823  1.00 58.74           C  
ANISOU 2120  CA  CYS A 317     7324   8873   6122   -546     29    577       C  
ATOM   2121  C   CYS A 317     -10.596   7.954   1.127  1.00 61.23           C  
ANISOU 2121  C   CYS A 317     7869   8995   6402   -574     60    610       C  
ATOM   2122  O   CYS A 317     -11.594   8.066   1.840  1.00 65.46           O  
ANISOU 2122  O   CYS A 317     8458   9466   6949   -428     -3    652       O  
ATOM   2123  CB  CYS A 317      -8.775   6.391   1.703  1.00 66.58           C  
ANISOU 2123  CB  CYS A 317     8126  10027   7144   -639     15    434       C  
ATOM   2124  SG  CYS A 317      -8.489   4.682   2.116  1.00 82.07           S  
ANISOU 2124  SG  CYS A 317     9843  12186   9152   -471    -90    410       S  
ATOM   2125  N   SER A 318      -9.961   8.992   0.603  1.00 63.21           N  
ANISOU 2125  N   SER A 318     8262   9145   6608   -766    172    583       N  
ATOM   2126  CA  SER A 318     -10.391  10.349   0.904  1.00 62.40           C  
ANISOU 2126  CA  SER A 318     8413   8825   6472   -805    215    603       C  
ATOM   2127  C   SER A 318     -11.731  10.669   0.266  1.00 59.23           C  
ANISOU 2127  C   SER A 318     8226   8258   6022   -614    181    747       C  
ATOM   2128  O   SER A 318     -12.310  11.709   0.539  1.00 65.48           O  
ANISOU 2128  O   SER A 318     9237   8858   6786   -572    192    775       O  
ATOM   2129  CB  SER A 318      -9.335  11.355   0.468  1.00 57.50           C  
ANISOU 2129  CB  SER A 318     7917   8114   5817  -1088    369    535       C  
ATOM   2130  OG  SER A 318      -8.874  11.009  -0.807  1.00 68.39           O  
ANISOU 2130  OG  SER A 318     9295   9539   7152  -1171    452    574       O  
ATOM   2131  N   ARG A 319     -12.189   9.823  -0.646  1.00 56.78           N  
ANISOU 2131  N   ARG A 319     7859   8021   5694   -496    139    823       N  
ATOM   2132  CA  ARG A 319     -13.494  10.039  -1.260  1.00 57.92           C  
ANISOU 2132  CA  ARG A 319     8164   8055   5789   -288     77    933       C  
ATOM   2133  C   ARG A 319     -14.558   9.177  -0.571  1.00 60.77           C  
ANISOU 2133  C   ARG A 319     8348   8519   6224    -79    -45    931       C  
ATOM   2134  O   ARG A 319     -15.756   9.407  -0.720  1.00 58.07           O  
ANISOU 2134  O   ARG A 319     8086   8113   5866    110   -111    981       O
[truncated: 513,055 more chars]
