# Supplementary material for: Isoliquiritigenin Inhibits the Growth of Colorectal Cancer Cells through the ESR2/PI3K/AKT Signalling Pathway
Source: Pharmaceuticals (Basel). 2023 Dec 27;17(1):43. doi: 10.3390/ph17010043 (PMC10820227; doi:10.3390/ph17010043)
Supplement: Supplementary file 1 [file pharmaceuticals-17-00043-s001.zip › crystal structures/PI3KCG/4g11.pdb]

HEADER    TRANSFERASE/TRANSFERASE INHIBITOR       10-JUL-12   4G11              
TITLE     X-RAY STRUCTURE OF PI3K-GAMMA BOUND TO A 4-(MORPHOLIN-4-YL)- (6-OXO-1,
TITLE    2 6-DIHYDROPYRIMIDIN-2-YL)AMIDE INHIBITOR                              
COMPND    MOL_ID: 1;                                                            
COMPND   2 MOLECULE: PHOSPHATIDYLINOSITOL 4,5-BISPHOSPHATE 3-KINASE CATALYTIC   
COMPND   3 SUBUNIT GAMMA ISOFORM;                                               
COMPND   4 CHAIN: A;                                                            
COMPND   5 FRAGMENT: UNP RESIDUES 144-1102;                                     
COMPND   6 SYNONYM: PI3-KINASE SUBUNIT GAMMA, PI3K-GAMMA, PI3KGAMMA, PTDINS-3-  
COMPND   7 KINASE SUBUNIT GAMMA, PHOSPHATIDYLINOSITOL 4,5-BISPHOSPHATE 3-KINASE 
COMPND   8 110 KDA CATALYTIC SUBUNIT GAMMA, PTDINS-3-KINASE SUBUNIT P110-GAMMA, 
COMPND   9 P110GAMMA, PHOSPHOINOSITIDE-3-KINASE CATALYTIC GAMMA POLYPEPTIDE,    
COMPND  10 SERINE/THREONINE PROTEIN KINASE PIK3CG, P120-PI3K;                   
COMPND  11 EC: 2.7.1.153, 2.7.11.1;                                             
COMPND  12 ENGINEERED: YES                                                      
SOURCE    MOL_ID: 1;                                                            
SOURCE   2 ORGANISM_SCIENTIFIC: HOMO SAPIENS;                                   
SOURCE   3 ORGANISM_COMMON: HUMAN;                                              
SOURCE   4 ORGANISM_TAXID: 9606;                                                
SOURCE   5 GENE: PIK3CG;                                                        
SOURCE   6 EXPRESSION_SYSTEM: SPODOPTERA FRUGIPERDA;                            
SOURCE   7 EXPRESSION_SYSTEM_TAXID: 7108;                                       
SOURCE   8 EXPRESSION_SYSTEM_STRAIN: SF9;                                       
SOURCE   9 EXPRESSION_SYSTEM_VECTOR_TYPE: VIRUS;                                
SOURCE  10 EXPRESSION_SYSTEM_PLASMID: BACULOVIRUS                               
KEYWDS    PHOSPHOINOSITIDE 3-KINASE GAMMA, SECONDARY MESSENGER GENERATION,      
KEYWDS   2 TRANSFERASE-TRANSFERASE INHIBITOR COMPLEX                            
EXPDTA    X-RAY DIFFRACTION                                                     
AUTHOR    R.MORALES                                                             
REVDAT   1   14-NOV-12 4G11    0                                                
JRNL        AUTH   V.CERTAL,F.HALLEY,A.VIRONE-ODDOS,F.THOMPSON,B.FILOCHE-ROMME, 
JRNL        AUTH 2 Y.EL-AHMAD,J.C.CARRY,C.DELORME,A.KARLSSON,P.Y.ABECASSIS,     
JRNL        AUTH 3 L.VINCENT,H.BONNEVAUX,J.P.NICOLAS,R.MORALES,N.MICHOT,I.VADE, 
JRNL        AUTH 4 A.LOUBOUTIN,S.PERRON,G.DOERFLINGER,B.TRIC,S.MONGET,          
JRNL        AUTH 5 C.LENGAUER,L.SCHIO                                           
JRNL        TITL   PREPARATION AND OPTIMIZATION OF NEW                          
JRNL        TITL 2 4-(MORPHOLIN-4-YL)-(6-OXO-1,6-DIHYDROPYRIMIDIN-2-YL)AMIDE    
JRNL        TITL 3 DERIVATIVES AS PI3K BETA INHIBITORS                          
JRNL        REF    BIOORG.MED.CHEM.LETT.         V.  22  6381 2012              
JRNL        REFN                   ISSN 0960-894X                               
JRNL        PMID   22981333                                                     
JRNL        DOI    10.1016/J.BMCL.2012.08.072                                   
REMARK   2                                                                      
REMARK   2 RESOLUTION.    3.40 ANGSTROMS.                                       
REMARK   3                                                                      
REMARK   3 REFINEMENT.                                                          
REMARK   3   PROGRAM     : REFMAC 5.5.0109                                      
REMARK   3   AUTHORS     : MURSHUDOV,VAGIN,DODSON                               
REMARK   3                                                                      
REMARK   3    REFINEMENT TARGET : MAXIMUM LIKELIHOOD                            
REMARK   3                                                                      
REMARK   3  DATA USED IN REFINEMENT.                                            
REMARK   3   RESOLUTION RANGE HIGH (ANGSTROMS) : 3.40                           
REMARK   3   RESOLUTION RANGE LOW  (ANGSTROMS) : 61.30                          
REMARK   3   DATA CUTOFF            (SIGMA(F)) : NULL                           
REMARK   3   COMPLETENESS FOR RANGE        (%) : 89.4                           
REMARK   3   NUMBER OF REFLECTIONS             : 11709                          
REMARK   3                                                                      
REMARK   3  FIT TO DATA USED IN REFINEMENT.                                     
REMARK   3   CROSS-VALIDATION METHOD          : THROUGHOUT                      
REMARK   3   FREE R VALUE TEST SET SELECTION  : RANDOM                          
REMARK   3   R VALUE     (WORKING + TEST SET) : 0.285                           
REMARK   3   R VALUE            (WORKING SET) : 0.282                           
REMARK   3   FREE R VALUE                     : 0.349                           
REMARK   3   FREE R VALUE TEST SET SIZE   (%) : 4.900                           
REMARK   3   FREE R VALUE TEST SET COUNT      : 609                             
REMARK   3                                                                      
REMARK   3  FIT IN THE HIGHEST RESOLUTION BIN.                                  
REMARK   3   TOTAL NUMBER OF BINS USED           : 20                           
REMARK   3   BIN RESOLUTION RANGE HIGH       (A) : 3.40                         
REMARK   3   BIN RESOLUTION RANGE LOW        (A) : 3.49                         
REMARK   3   REFLECTION IN BIN     (WORKING SET) : 843                          
REMARK   3   BIN COMPLETENESS (WORKING+TEST) (%) : 91.57                        
REMARK   3   BIN R VALUE           (WORKING SET) : 0.3500                       
REMARK   3   BIN FREE R VALUE SET COUNT          : 48                           
REMARK   3   BIN FREE R VALUE                    : 0.4050                       
REMARK   3                                                                      
REMARK   3  NUMBER OF NON-HYDROGEN ATOMS USED IN REFINEMENT.                    
REMARK   3   PROTEIN ATOMS            : 6778                                    
REMARK   3   NUCLEIC ACID ATOMS       : 0                                       
REMARK   3   HETEROGEN ATOMS          : 23                                      
REMARK   3   SOLVENT ATOMS            : 0                                       
REMARK   3                                                                      
REMARK   3  B VALUES.                                                           
REMARK   3   FROM WILSON PLOT           (A**2) : NULL                           
REMARK   3   MEAN B VALUE      (OVERALL, A**2) : 79.83                          
REMARK   3   OVERALL ANISOTROPIC B VALUE.                                       
REMARK   3    B11 (A**2) : -0.23000                                             
REMARK   3    B22 (A**2) : 0.37000                                              
REMARK   3    B33 (A**2) : -0.07000                                             
REMARK   3    B12 (A**2) : 0.00000                                              
REMARK   3    B13 (A**2) : 0.36000                                              
REMARK   3    B23 (A**2) : 0.00000                                              
REMARK   3                                                                      
REMARK   3  ESTIMATED OVERALL COORDINATE ERROR.                                 
REMARK   3   ESU BASED ON R VALUE                            (A): NULL          
REMARK   3   ESU BASED ON FREE R VALUE                       (A): 0.955         
REMARK   3   ESU BASED ON MAXIMUM LIKELIHOOD                 (A): 0.841         
REMARK   3   ESU FOR B VALUES BASED ON MAXIMUM LIKELIHOOD (A**2): 54.406        
REMARK   3                                                                      
REMARK   3 CORRELATION COEFFICIENTS.                                            
REMARK   3   CORRELATION COEFFICIENT FO-FC      : 0.872                         
REMARK   3   CORRELATION COEFFICIENT FO-FC FREE : 0.769                         
REMARK   3                                                                      
REMARK   3  RMS DEVIATIONS FROM IDEAL VALUES        COUNT    RMS    WEIGHT      
REMARK   3   BOND LENGTHS REFINED ATOMS        (A):  6943 ; 0.005 ; 0.022       
REMARK   3   BOND LENGTHS OTHERS               (A):  NULL ;  NULL ;  NULL       
REMARK   3   BOND ANGLES REFINED ATOMS   (DEGREES):  9389 ; 0.800 ; 1.963       
REMARK   3   BOND ANGLES OTHERS          (DEGREES):  NULL ;  NULL ;  NULL       
REMARK   3   TORSION ANGLES, PERIOD 1    (DEGREES):   827 ; 3.272 ; 5.000       
REMARK   3   TORSION ANGLES, PERIOD 2    (DEGREES):   327 ;28.302 ;24.281       
REMARK   3   TORSION ANGLES, PERIOD 3    (DEGREES):  1259 ;14.624 ;15.000       
REMARK   3   TORSION ANGLES, PERIOD 4    (DEGREES):    42 ;11.265 ;15.000       
REMARK   3   CHIRAL-CENTER RESTRAINTS       (A**3):  1053 ; 0.048 ; 0.200       
REMARK   3   GENERAL PLANES REFINED ATOMS      (A):  5170 ; 0.003 ; 0.021       
REMARK   3   GENERAL PLANES OTHERS             (A):  NULL ;  NULL ;  NULL       
REMARK   3   NON-BONDED CONTACTS REFINED ATOMS (A):  NULL ;  NULL ;  NULL       
REMARK   3   NON-BONDED CONTACTS OTHERS        (A):  NULL ;  NULL ;  NULL       
REMARK   3   NON-BONDED TORSION REFINED ATOMS  (A):  NULL ;  NULL ;  NULL       
REMARK   3   NON-BONDED TORSION OTHERS         (A):  NULL ;  NULL ;  NULL       
REMARK   3   H-BOND (X...Y) REFINED ATOMS      (A):  NULL ;  NULL ;  NULL       
REMARK   3   H-BOND (X...Y) OTHERS             (A):  NULL ;  NULL ;  NULL       
REMARK   3   POTENTIAL METAL-ION REFINED ATOMS (A):  NULL ;  NULL ;  NULL       
REMARK   3   POTENTIAL METAL-ION OTHERS        (A):  NULL ;  NULL ;  NULL       
REMARK   3   SYMMETRY VDW REFINED ATOMS        (A):  NULL ;  NULL ;  NULL       
REMARK   3   SYMMETRY VDW OTHERS               (A):  NULL ;  NULL ;  NULL       
REMARK   3   SYMMETRY H-BOND REFINED ATOMS     (A):  NULL ;  NULL ;  NULL       
REMARK   3   SYMMETRY H-BOND OTHERS            (A):  NULL ;  NULL ;  NULL       
REMARK   3   SYMMETRY METAL-ION REFINED ATOMS  (A):  NULL ;  NULL ;  NULL       
REMARK   3   SYMMETRY METAL-ION OTHERS         (A):  NULL ;  NULL ;  NULL       
REMARK   3                                                                      
REMARK   3  ISOTROPIC THERMAL FACTOR RESTRAINTS.     COUNT   RMS    WEIGHT      
REMARK   3   MAIN-CHAIN BOND REFINED ATOMS  (A**2):  NULL ;  NULL ;  NULL       
REMARK   3   MAIN-CHAIN BOND OTHER ATOMS    (A**2):  NULL ;  NULL ;  NULL       
REMARK   3   MAIN-CHAIN ANGLE REFINED ATOMS (A**2):  NULL ;  NULL ;  NULL       
REMARK   3   SIDE-CHAIN BOND REFINED ATOMS  (A**2):  NULL ;  NULL ;  NULL       
REMARK   3   SIDE-CHAIN ANGLE REFINED ATOMS (A**2):  NULL ;  NULL ;  NULL       
REMARK   3                                                                      
REMARK   3 ANISOTROPIC THERMAL FACTOR RESTRAINTS.    COUNT   RMS   WEIGHT       
REMARK   3   RIGID-BOND RESTRAINTS          (A**2):  NULL ;  NULL ;  NULL       
REMARK   3   SPHERICITY; FREE ATOMS         (A**2):  NULL ;  NULL ;  NULL       
REMARK   3   SPHERICITY; BONDED ATOMS       (A**2):  NULL ;  NULL ;  NULL       
REMARK   3                                                                      
REMARK   3  NCS RESTRAINTS STATISTICS                                           
REMARK   3   NUMBER OF DIFFERENT NCS GROUPS : NULL                              
REMARK   3                                                                      
REMARK   3  TLS DETAILS                                                         
REMARK   3   NUMBER OF TLS GROUPS  : NULL                                       
REMARK   3                                                                      
REMARK   3  BULK SOLVENT MODELLING.                                             
REMARK   3   METHOD USED : MASK                                                 
REMARK   3   PARAMETERS FOR MASK CALCULATION                                    
REMARK   3   VDW PROBE RADIUS   : 1.40                                          
REMARK   3   ION PROBE RADIUS   : 0.80                                          
REMARK   3   SHRINKAGE RADIUS   : 0.80                                          
REMARK   3                                                                      
REMARK   3  OTHER REFINEMENT REMARKS: HYDROGENS HAVE BEEN ADDED IN THE RIDING   
REMARK   3  POSITIONS                                                           
REMARK   4                                                                      
REMARK   4 4G11 COMPLIES WITH FORMAT V. 3.30, 13-JUL-11                         
REMARK 100                                                                      
REMARK 100 THIS ENTRY HAS BEEN PROCESSED BY RCSB ON 19-JUL-12.                  
REMARK 100 THE RCSB ID CODE IS RCSB073602.                                      
REMARK 200                                                                      
REMARK 200 EXPERIMENTAL DETAILS                                                 
REMARK 200  EXPERIMENT TYPE                : X-RAY DIFFRACTION                  
REMARK 200  DATE OF DATA COLLECTION        : NULL                               
REMARK 200  TEMPERATURE           (KELVIN) : 100                                
REMARK 200  PH                             : NULL                               
REMARK 200  NUMBER OF CRYSTALS USED        : 1                                  
REMARK 200                                                                      
REMARK 200  SYNCHROTRON              (Y/N) : Y                                  
REMARK 200  RADIATION SOURCE               : ESRF                               
REMARK 200  BEAMLINE                       : ID14-2                             
REMARK 200  X-RAY GENERATOR MODEL          : NULL                               
REMARK 200  MONOCHROMATIC OR LAUE    (M/L) : M                                  
REMARK 200  WAVELENGTH OR RANGE        (A) : 0.972400                           
REMARK 200  MONOCHROMATOR                  : NULL                               
REMARK 200  OPTICS                         : NULL                               
REMARK 200                                                                      
REMARK 200  DETECTOR TYPE                  : NULL                               
REMARK 200  DETECTOR MANUFACTURER          : NULL                               
REMARK 200  INTENSITY-INTEGRATION SOFTWARE : PROCESS                            
REMARK 200  DATA SCALING SOFTWARE          : SCALA                              
REMARK 200                                                                      
REMARK 200  NUMBER OF UNIQUE REFLECTIONS   : 12318                              
REMARK 200  RESOLUTION RANGE HIGH      (A) : 3.400                              
REMARK 200  RESOLUTION RANGE LOW       (A) : 61.300                             
REMARK 200  REJECTION CRITERIA  (SIGMA(I)) : 2.000                              
REMARK 200                                                                      
REMARK 200 OVERALL.                                                             
REMARK 200  COMPLETENESS FOR RANGE     (%) : 89.9                               
REMARK 200  DATA REDUNDANCY                : 2.800                              
REMARK 200  R MERGE                    (I) : 0.09900                            
REMARK 200  R SYM                      (I) : NULL                               
REMARK 200  <I/SIGMA(I)> FOR THE DATA SET  : 7.9000                             
REMARK 200                                                                      
REMARK 200 IN THE HIGHEST RESOLUTION SHELL.                                     
REMARK 200  HIGHEST RESOLUTION SHELL, RANGE HIGH (A) : 3.40                     
REMARK 200  HIGHEST RESOLUTION SHELL, RANGE LOW  (A) : 3.58                     
REMARK 200  COMPLETENESS FOR SHELL     (%) : 91.8                               
REMARK 200  DATA REDUNDANCY IN SHELL       : 2.80                               
REMARK 200  R MERGE FOR SHELL          (I) : 0.43800                            
REMARK 200  R SYM FOR SHELL            (I) : NULL                               
REMARK 200  <I/SIGMA(I)> FOR SHELL         : 2.400                              
REMARK 200                                                                      
REMARK 200 DIFFRACTION PROTOCOL: SINGLE WAVELENGTH                              
REMARK 200 METHOD USED TO DETERMINE THE STRUCTURE: MOLECULAR REPLACEMENT        
REMARK 200 SOFTWARE USED: MOLREP                                                
REMARK 200 STARTING MODEL: PDB ENTRY 1E8Y                                       
REMARK 200                                                                      
REMARK 200 REMARK: NULL                                                         
REMARK 280                                                                      
REMARK 280 CRYSTAL                                                              
REMARK 280 SOLVENT CONTENT, VS   (%): 45.38                                     
REMARK 280 MATTHEWS COEFFICIENT, VM (ANGSTROMS**3/DA): 2.25                     
REMARK 280                                                                      
REMARK 280 CRYSTALLIZATION CONDITIONS: 22% PEG3350, 0.2M NA MALONATE, VAPOR     
REMARK 280  DIFFUSION, HANGING DROP, TEMPERATURE 298K                           
REMARK 290                                                                      
REMARK 290 CRYSTALLOGRAPHIC SYMMETRY                                            
REMARK 290 SYMMETRY OPERATORS FOR SPACE GROUP: C 1 2 1                          
REMARK 290                                                                      
REMARK 290      SYMOP   SYMMETRY                                                
REMARK 290     NNNMMM   OPERATOR                                                
REMARK 290       1555   X,Y,Z                                                   
REMARK 290       2555   -X,Y,-Z                                                 
REMARK 290       3555   X+1/2,Y+1/2,Z                                           
REMARK 290       4555   -X+1/2,Y+1/2,-Z                                         
REMARK 290                                                                      
REMARK 290     WHERE NNN -> OPERATOR NUMBER                                     
REMARK 290           MMM -> TRANSLATION VECTOR                                  
REMARK 290                                                                      
REMARK 290 CRYSTALLOGRAPHIC SYMMETRY TRANSFORMATIONS                            
REMARK 290 THE FOLLOWING TRANSFORMATIONS OPERATE ON THE ATOM/HETATM             
REMARK 290 RECORDS IN THIS ENTRY TO PRODUCE CRYSTALLOGRAPHICALLY                
REMARK 290 RELATED MOLECULES.                                                   
REMARK 290   SMTRY1   1  1.000000  0.000000  0.000000        0.00000            
REMARK 290   SMTRY2   1  0.000000  1.000000  0.000000        0.00000            
REMARK 290   SMTRY3   1  0.000000  0.000000  1.000000        0.00000            
REMARK 290   SMTRY1   2 -1.000000  0.000000  0.000000        0.00000            
REMARK 290   SMTRY2   2  0.000000  1.000000  0.000000        0.00000            
REMARK 290   SMTRY3   2  0.000000  0.000000 -1.000000        0.00000            
REMARK 290   SMTRY1   3  1.000000  0.000000  0.000000       70.31500            
REMARK 290   SMTRY2   3  0.000000  1.000000  0.000000       33.69000            
REMARK 290   SMTRY3   3  0.000000  0.000000  1.000000        0.00000            
REMARK 290   SMTRY1   4 -1.000000  0.000000  0.000000       70.31500            
REMARK 290   SMTRY2   4  0.000000  1.000000  0.000000       33.69000            
REMARK 290   SMTRY3   4  0.000000  0.000000 -1.000000        0.00000            
REMARK 290                                                                      
REMARK 290 REMARK: NULL                                                         
REMARK 300                                                                      
REMARK 300 BIOMOLECULE: 1                                                       
REMARK 300 SEE REMARK 350 FOR THE AUTHOR PROVIDED AND/OR PROGRAM                
REMARK 300 GENERATED ASSEMBLY INFORMATION FOR THE STRUCTURE IN                  
REMARK 300 THIS ENTRY. THE REMARK MAY ALSO PROVIDE INFORMATION ON               
REMARK 300 BURIED SURFACE AREA.                                                 
REMARK 350                                                                      
REMARK 350 COORDINATES FOR A COMPLETE MULTIMER REPRESENTING THE KNOWN           
REMARK 350 BIOLOGICALLY SIGNIFICANT OLIGOMERIZATION STATE OF THE                
REMARK 350 MOLECULE CAN BE GENERATED BY APPLYING BIOMT TRANSFORMATIONS          
REMARK 350 GIVEN BELOW.  BOTH NON-CRYSTALLOGRAPHIC AND                          
REMARK 350 CRYSTALLOGRAPHIC OPERATIONS ARE GIVEN.                               
REMARK 350                                                                      
REMARK 350 BIOMOLECULE: 1                                                       
REMARK 350 AUTHOR DETERMINED BIOLOGICAL UNIT: MONOMERIC                         
REMARK 350 SOFTWARE DETERMINED QUATERNARY STRUCTURE: MONOMERIC                  
REMARK 350 SOFTWARE USED: PISA                                                  
REMARK 350 APPLY THE FOLLOWING TO CHAINS: A                                     
REMARK 350   BIOMT1   1  1.000000  0.000000  0.000000        0.00000            
REMARK 350   BIOMT2   1  0.000000  1.000000  0.000000        0.00000            
REMARK 350   BIOMT3   1  0.000000  0.000000  1.000000        0.00000            
REMARK 465                                                                      
REMARK 465 MISSING RESIDUES                                                     
REMARK 465 THE FOLLOWING RESIDUES WERE NOT LOCATED IN THE                       
REMARK 465 EXPERIMENT. (M=MODEL NUMBER; RES=RESIDUE NAME; C=CHAIN               
REMARK 465 IDENTIFIER; SSSEQ=SEQUENCE NUMBER; I=INSERTION CODE.)                
REMARK 465                                                                      
REMARK 465   M RES C SSSEQI                                                     
REMARK 465     LYS A   254                                                      
REMARK 465     LYS A   255                                                      
REMARK 465     LYS A   256                                                      
REMARK 465     SER A   257                                                      
REMARK 465     LEU A   258                                                      
REMARK 465     MET A   259                                                      
REMARK 465     ASP A   260                                                      
REMARK 465     ILE A   261                                                      
REMARK 465     PRO A   262                                                      
REMARK 465     GLU A   263                                                      
REMARK 465     SER A   264                                                      
REMARK 465     GLN A   265                                                      
REMARK 465     SER A   266                                                      
REMARK 465     GLU A   322                                                      
REMARK 465     TRP A   323                                                      
REMARK 465     PRO A   324                                                      
REMARK 465     LEU A   325                                                      
REMARK 465     VAL A   326                                                      
REMARK 465     ASP A   327                                                      
REMARK 465     ASP A   328                                                      
REMARK 465     CYS A   329                                                      
REMARK 465     THR A   330                                                      
REMARK 465     GLY A   331                                                      
REMARK 465     VAL A   332                                                      
REMARK 465     THR A   333                                                      
REMARK 465     GLY A   334                                                      
REMARK 465     TYR A   335                                                      
REMARK 465     HIS A   336                                                      
REMARK 465     GLU A   337                                                      
REMARK 465     GLN A   338                                                      
REMARK 465     LEU A   339                                                      
REMARK 465     THR A   340                                                      
REMARK 465     ILE A   341                                                      
REMARK 465     HIS A   342                                                      
REMARK 465     GLY A   343                                                      
REMARK 465     LYS A   344                                                      
REMARK 465     ASP A   345                                                      
REMARK 465     HIS A   346                                                      
REMARK 465     GLU A   347                                                      
REMARK 465     SER A   348                                                      
REMARK 465     VAL A   349                                                      
REMARK 465     PHE A   350                                                      
REMARK 465     THR A   351                                                      
REMARK 465     VAL A   352                                                      
REMARK 465     SER A   353                                                      
REMARK 465     LEU A   354                                                      
REMARK 465     TRP A   355                                                      
REMARK 465     ASP A   356                                                      
REMARK 465     GLY A   436                                                      
REMARK 465     LYS A   437                                                      
REMARK 465     ALA A   438                                                      
REMARK 465     PRO A   439                                                      
REMARK 465     ALA A   440                                                      
REMARK 465     LEU A   441                                                      
REMARK 465     SER A   442                                                      
REMARK 465     SER A   443                                                      
REMARK 465     LYS A   444                                                      
REMARK 465     ALA A   445                                                      
REMARK 465     SER A   446                                                      
REMARK 465     ALA A   447                                                      
REMARK 465     GLU A   448                                                      
REMARK 465     SER A   449                                                      
REMARK 465     PRO A   450                                                      
REMARK 465     SER A   451                                                      
REMARK 465     SER A   452                                                      
REMARK 465     GLU A   453                                                      
REMARK 465     SER A   454                                                      
REMARK 465     LYS A   455                                                      
REMARK 465     GLY A   456                                                      
REMARK 465     LYS A   457                                                      
REMARK 465     VAL A   458                                                      
REMARK 465     GLN A   459                                                      
REMARK 465     LYS A   490                                                      
REMARK 465     GLY A   491                                                      
REMARK 465     GLU A   492                                                      
REMARK 465     ASP A   493                                                      
REMARK 465     GLN A   494                                                      
REMARK 465     GLY A   495                                                      
REMARK 465     SER A   496                                                      
REMARK 465     TYR A   523                                                      
REMARK 465     CYS A   524                                                      
REMARK 465     LEU A   529                                                      
REMARK 465     PRO A   530                                                      
REMARK 465     LYS A   531                                                      
REMARK 465     HIS A   532                                                      
REMARK 465     GLN A   533                                                      
REMARK 465     PRO A   534                                                      
REMARK 465     THR A   535                                                      
REMARK 465     PRO A   536                                                      
REMARK 465     ASP A   537                                                      
REMARK 465     PRO A   538                                                      
REMARK 465     GLU A   539                                                      
REMARK 465     GLY A   540                                                      
REMARK 465     ASP A   541                                                      
REMARK 465     ARG A   542                                                      
REMARK 465     VAL A   543                                                      
REMARK 465     ALA A   901                                                      
REMARK 465     ILE A   968                                                      
REMARK 465     LEU A   969                                                      
REMARK 465     GLY A   970                                                      
REMARK 465     ASN A   971                                                      
REMARK 465     TYR A   972                                                      
REMARK 465     LYS A   973                                                      
REMARK 465     SER A   974                                                      
REMARK 465     PHE A   975                                                      
REMARK 465     LEU A   976                                                      
REMARK 465     GLY A   977                                                      
REMARK 465     ILE A   978                                                      
REMARK 465     ASN A   979                                                      
REMARK 465     LYS A   980                                                      
REMARK 465     HIS A  1089                                                      
REMARK 465     LEU A  1090                                                      
REMARK 465     VAL A  1091                                                      
REMARK 465     LEU A  1092                                                      
REMARK 465     GLY A  1093                                                      
REMARK 465     ILE A  1094                                                      
REMARK 465     LYS A  1095                                                      
REMARK 465     GLN A  1096                                                      
REMARK 465     GLY A  1097                                                      
REMARK 465     GLU A  1098                                                      
REMARK 465     LYS A  1099                                                      
REMARK 465     HIS A  1100                                                      
REMARK 465     SER A  1101                                                      
REMARK 465     ALA A  1102                                                      
REMARK 465     HIS A  1103                                                      
REMARK 465     HIS A  1104                                                      
REMARK 465     HIS A  1105                                                      
REMARK 465     HIS A  1106                                                      
REMARK 465     HIS A  1107                                                      
REMARK 465     HIS A  1108                                                      
REMARK 470                                                                      
REMARK 470 MISSING ATOM                                                         
REMARK 470 THE FOLLOWING RESIDUES HAVE MISSING ATOMS (M=MODEL NUMBER;           
REMARK 470 RES=RESIDUE NAME; C=CHAIN IDENTIFIER; SSEQ=SEQUENCE NUMBER;          
REMARK 470 I=INSERTION CODE):                                                   
REMARK 470   M RES CSSEQI  ATOMS                                                
REMARK 470     MET A 143    CG   SD   CE                                        
REMARK 480                                                                      
REMARK 480 ZERO OCCUPANCY ATOM                                                  
REMARK 480 THE FOLLOWING RESIDUES HAVE ATOMS MODELED WITH ZERO                  
REMARK 480 OCCUPANCY. THE LOCATION AND PROPERTIES OF THESE ATOMS                
REMARK 480 MAY NOT BE RELIABLE. (M=MODEL NUMBER; RES=RESIDUE NAME;              
REMARK 480 C=CHAIN IDENTIFIER; SSEQ=SEQUENCE NUMBER; I=INSERTION CODE):         
REMARK 480   M RES C SSEQI ATOMS                                                
REMARK 480     MET A  804   CB   CG   SD   CE                                   
REMARK 500                                                                      
REMARK 500 GEOMETRY AND STEREOCHEMISTRY                                         
REMARK 500 SUBTOPIC: TORSION ANGLES                                             
REMARK 500                                                                      
REMARK 500 TORSION ANGLES OUTSIDE THE EXPECTED RAMACHANDRAN REGIONS:            
REMARK 500 (M=MODEL NUMBER; RES=RESIDUE NAME; C=CHAIN IDENTIFIER;               
REMARK 500 SSEQ=SEQUENCE NUMBER; I=INSERTION CODE).                             
REMARK 500                                                                      
REMARK 500 STANDARD TABLE:                                                      
REMARK 500 FORMAT:(10X,I3,1X,A3,1X,A1,I4,A1,4X,F7.2,3X,F7.2)                    
REMARK 500                                                                      
REMARK 500 EXPECTED VALUES: GJ KLEYWEGT AND TA JONES (1996). PHI/PSI-           
REMARK 500 CHOLOGY: RAMACHANDRAN REVISITED. STRUCTURE 4, 1395 - 1400            
REMARK 500                                                                      
REMARK 500  M RES CSSEQI        PSI       PHI                                   
REMARK 500    ALA A 216       32.22    -91.75                                   
REMARK 500    ASN A 217       -4.61   -147.92                                   
REMARK 500    ARG A 226       59.97   -159.65                                   
REMARK 500    SER A 227      -93.30     76.99                                   
REMARK 500    PRO A 237       26.14    -60.68                                   
REMARK 500    ASP A 238       42.18   -150.17                                   
REMARK 500    PHE A 248      -51.53   -135.41                                   
REMARK 500    MET A 252      -70.44   -101.51                                   
REMARK 500    ARG A 375     -151.11   -144.63                                   
REMARK 500    ASN A 376     -110.02    -78.99                                   
REMARK 500    GLN A 391      -27.51     68.42                                   
REMARK 500    PHE A 473       -1.73     70.26                                   
REMARK 500    ASP A 521       84.97   -160.24                                   
REMARK 500    ALA A 545       84.45     54.22                                   
REMARK 500    PHE A 578       50.04   -107.60                                   
REMARK 500    ARG A 613       54.02   -109.42                                   
REMARK 500    ASP A 758      -55.97   -158.97                                   
REMARK 500    VAL A 759      100.16     56.95                                   
REMARK 500    ASN A 776     -134.19    -74.15                                   
REMARK 500    SER A 777       30.69    -86.89                                   
REMARK 500    PRO A 810     -167.17   -102.05                                   
REMARK 500    VAL A 896     -146.88    -99.05                                   
REMARK 500    ASP A 964       81.22     49.40                                   
REMARK 500    LEU A 987       64.72   -153.18                                   
REMARK 500    LYS A1000       91.64     57.71                                   
REMARK 500    LYS A1001     -139.72   -154.28                                   
REMARK 500    PRO A1040     -135.60    -70.40                                   
REMARK 500    LYS A1045      -63.66   -128.51                                   
REMARK 500    THR A1056       55.94     35.86                                   
REMARK 500    TRP A1086       80.77    -60.74                                   
REMARK 500    PHE A1087      -33.50   -147.81                                   
REMARK 500                                                                      
REMARK 500 REMARK: NULL                                                         
REMARK 800                                                                      
REMARK 800 SITE                                                                 
REMARK 800 SITE_IDENTIFIER: AC1                                                 
REMARK 800 EVIDENCE_CODE: SOFTWARE                                              
REMARK 800 SITE_DESCRIPTION: BINDING SITE FOR RESIDUE 0W7 A 1201                
DBREF  4G11 A  144  1102  UNP    P48736   PK3CG_HUMAN    144   1102             
SEQADV 4G11 MET A  143  UNP  P48736              EXPRESSION TAG                 
SEQADV 4G11 HIS A 1103  UNP  P48736              EXPRESSION TAG                 
SEQADV 4G11 HIS A 1104  UNP  P48736              EXPRESSION TAG                 
SEQADV 4G11 HIS A 1105  UNP  P48736              EXPRESSION TAG                 
SEQADV 4G11 HIS A 1106  UNP  P48736              EXPRESSION TAG                 
SEQADV 4G11 HIS A 1107  UNP  P48736              EXPRESSION TAG                 
SEQADV 4G11 HIS A 1108  UNP  P48736              EXPRESSION TAG                 
SEQRES   1 A  966  MET SER GLU GLU SER GLN ALA PHE GLN ARG GLN LEU THR          
SEQRES   2 A  966  ALA LEU ILE GLY TYR ASP VAL THR ASP VAL SER ASN VAL          
SEQRES   3 A  966  HIS ASP ASP GLU LEU GLU PHE THR ARG ARG GLY LEU VAL          
SEQRES   4 A  966  THR PRO ARG MET ALA GLU VAL ALA SER ARG ASP PRO LYS          
SEQRES   5 A  966  LEU TYR ALA MET HIS PRO TRP VAL THR SER LYS PRO LEU          
SEQRES   6 A  966  PRO GLU TYR LEU TRP LYS LYS ILE ALA ASN ASN CYS ILE          
SEQRES   7 A  966  PHE ILE VAL ILE HIS ARG SER THR THR SER GLN THR ILE          
SEQRES   8 A  966  LYS VAL SER PRO ASP ASP THR PRO GLY ALA ILE LEU GLN          
SEQRES   9 A  966  SER PHE PHE THR LYS MET ALA LYS LYS LYS SER LEU MET          
SEQRES  10 A  966  ASP ILE PRO GLU SER GLN SER GLU GLN ASP PHE VAL LEU          
SEQRES  11 A  966  ARG VAL CYS GLY ARG ASP GLU TYR LEU VAL GLY GLU THR          
SEQRES  12 A  966  PRO ILE LYS ASN PHE GLN TRP VAL ARG HIS CYS LEU LYS          
SEQRES  13 A  966  ASN GLY GLU GLU ILE HIS VAL VAL LEU ASP THR PRO PRO          
SEQRES  14 A  966  ASP PRO ALA LEU ASP GLU VAL ARG LYS GLU GLU TRP PRO          
SEQRES  15 A  966  LEU VAL ASP ASP CYS THR GLY VAL THR GLY TYR HIS GLU          
SEQRES  16 A  966  GLN LEU THR ILE HIS GLY LYS ASP HIS GLU SER VAL PHE          
SEQRES  17 A  966  THR VAL SER LEU TRP ASP CYS ASP ARG LYS PHE ARG VAL          
SEQRES  18 A  966  LYS ILE ARG GLY ILE ASP ILE PRO VAL LEU PRO ARG ASN          
SEQRES  19 A  966  THR ASP LEU THR VAL PHE VAL GLU ALA ASN ILE GLN HIS          
SEQRES  20 A  966  GLY GLN GLN VAL LEU CYS GLN ARG ARG THR SER PRO LYS          
SEQRES  21 A  966  PRO PHE THR GLU GLU VAL LEU TRP ASN VAL TRP LEU GLU          
SEQRES  22 A  966  PHE SER ILE LYS ILE LYS ASP LEU PRO LYS GLY ALA LEU          
SEQRES  23 A  966  LEU ASN LEU GLN ILE TYR CYS GLY LYS ALA PRO ALA LEU          
SEQRES  24 A  966  SER SER LYS ALA SER ALA GLU SER PRO SER SER GLU SER          
SEQRES  25 A  966  LYS GLY LYS VAL GLN LEU LEU TYR TYR VAL ASN LEU LEU          
SEQRES  26 A  966  LEU ILE ASP HIS ARG PHE LEU LEU ARG ARG GLY GLU TYR          
SEQRES  27 A  966  VAL LEU HIS MET TRP GLN ILE SER GLY LYS GLY GLU ASP          
SEQRES  28 A  966  GLN GLY SER PHE ASN ALA ASP LYS LEU THR SER ALA THR          
SEQRES  29 A  966  ASN PRO ASP LYS GLU ASN SER MET SER ILE SER ILE LEU          
SEQRES  30 A  966  LEU ASP ASN TYR CYS HIS PRO ILE ALA LEU PRO LYS HIS          
SEQRES  31 A  966  GLN PRO THR PRO ASP PRO GLU GLY ASP ARG VAL ARG ALA          
SEQRES  32 A  966  GLU MET PRO ASN GLN LEU ARG LYS GLN LEU GLU ALA ILE          
SEQRES  33 A  966  ILE ALA THR ASP PRO LEU ASN PRO LEU THR ALA GLU ASP          
SEQRES  34 A  966  LYS GLU LEU LEU TRP HIS PHE ARG TYR GLU SER LEU LYS          
SEQRES  35 A  966  HIS PRO LYS ALA TYR PRO LYS LEU PHE SER SER VAL LYS          
SEQRES  36 A  966  TRP GLY GLN GLN GLU ILE VAL ALA LYS THR TYR GLN LEU          
SEQRES  37 A  966  LEU ALA ARG ARG GLU VAL TRP ASP GLN SER ALA LEU ASP          
SEQRES  38 A  966  VAL GLY LEU THR MET GLN LEU LEU ASP CYS ASN PHE SER          
SEQRES  39 A  966  ASP GLU ASN VAL ARG ALA ILE ALA VAL GLN LYS LEU GLU          
SEQRES  40 A  966  SER LEU GLU ASP ASP ASP VAL LEU HIS TYR LEU LEU GLN          
SEQRES  41 A  966  LEU VAL GLN ALA VAL LYS PHE GLU PRO TYR HIS ASP SER          
SEQRES  42 A  966  ALA LEU ALA ARG PHE LEU LEU LYS ARG GLY LEU ARG ASN          
SEQRES  43 A  966  LYS ARG ILE GLY HIS PHE LEU PHE TRP PHE LEU ARG SER          
SEQRES  44 A  966  GLU ILE ALA GLN SER ARG HIS TYR GLN GLN ARG PHE ALA          
SEQRES  45 A  966  VAL ILE LEU GLU ALA TYR LEU ARG GLY CYS GLY THR ALA          
SEQRES  46 A  966  MET LEU HIS ASP PHE THR GLN GLN VAL GLN VAL ILE GLU          
SEQRES  47 A  966  MET LEU GLN LYS VAL THR LEU ASP ILE LYS SER LEU SER          
SEQRES  48 A  966  ALA GLU LYS TYR ASP VAL SER SER GLN VAL ILE SER GLN          
SEQRES  49 A  966  LEU LYS GLN LYS LEU GLU ASN LEU GLN ASN SER GLN LEU          
SEQRES  50 A  966  PRO GLU SER PHE ARG VAL PRO TYR ASP PRO GLY LEU LYS          
SEQRES  51 A  966  ALA GLY ALA LEU ALA ILE GLU LYS CYS LYS VAL MET ALA          
SEQRES  52 A  966  SER LYS LYS LYS PRO LEU TRP LEU GLU PHE LYS CYS ALA          
SEQRES  53 A  966  ASP PRO THR ALA LEU SER ASN GLU THR ILE GLY ILE ILE          
SEQRES  54 A  966  PHE LYS HIS GLY ASP ASP LEU ARG GLN ASP MET LEU ILE          
SEQRES  55 A  966  LEU GLN ILE LEU ARG ILE MET GLU SER ILE TRP GLU THR          
SEQRES  56 A  966  GLU SER LEU ASP LEU CYS LEU LEU PRO TYR GLY CYS ILE          
SEQRES  57 A  966  SER THR GLY ASP LYS ILE GLY MET ILE GLU ILE VAL LYS          
SEQRES  58 A  966  ASP ALA THR THR ILE ALA LYS ILE GLN GLN SER THR VAL          
SEQRES  59 A  966  GLY ASN THR GLY ALA PHE LYS ASP GLU VAL LEU ASN HIS          
SEQRES  60 A  966  TRP LEU LYS GLU LYS SER PRO THR GLU GLU LYS PHE GLN          
SEQRES  61 A  966  ALA ALA VAL GLU ARG PHE VAL TYR SER CYS ALA GLY TYR          
SEQRES  62 A  966  CYS VAL ALA THR PHE VAL LEU GLY ILE GLY ASP ARG HIS          
SEQRES  63 A  966  ASN ASP ASN ILE MET ILE THR GLU THR GLY ASN LEU PHE          
SEQRES  64 A  966  HIS ILE ASP PHE GLY HIS ILE LEU GLY ASN TYR LYS SER          
SEQRES  65 A  966  PHE LEU GLY ILE ASN LYS GLU ARG VAL PRO PHE VAL LEU          
SEQRES  66 A  966  THR PRO ASP PHE LEU PHE VAL MET GLY THR SER GLY LYS          
SEQRES  67 A  966  LYS THR SER PRO HIS PHE GLN LYS PHE GLN ASP ILE CYS          
SEQRES  68 A  966  VAL LYS ALA TYR LEU ALA LEU ARG HIS HIS THR ASN LEU          
SEQRES  69 A  966  LEU ILE ILE LEU PHE SER MET MET LEU MET THR GLY MET          
SEQRES  70 A  966  PRO GLN LEU THR SER LYS GLU ASP ILE GLU TYR ILE ARG          
SEQRES  71 A  966  ASP ALA LEU THR VAL GLY LYS ASN GLU GLU ASP ALA LYS          
SEQRES  72 A  966  LYS TYR PHE LEU ASP GLN ILE GLU VAL CYS ARG ASP LYS          
SEQRES  73 A  966  GLY TRP THR VAL GLN PHE ASN TRP PHE LEU HIS LEU VAL          
SEQRES  74 A  966  LEU GLY ILE LYS GLN GLY GLU LYS HIS SER ALA HIS HIS          
SEQRES  75 A  966  HIS HIS HIS HIS                                              
HET    0W7  A1201      23                                                       
HETNAM     0W7 2-[4-(MORPHOLIN-4-YL)-6-OXO-1,6-DIHYDROPYRIMIDIN-2-YL]-          
HETNAM   2 0W7  N-PHENYLACETAMIDE                                               
FORMUL   2  0W7    C16 H18 N4 O3                                                
HELIX    1   1 SER A  144  GLY A  159  1                                  16    
HELIX    2   2 ASP A  171  LEU A  180  1                                  10    
HELIX    3   3 LEU A  180  ALA A  189  1                                  10    
HELIX    4   4 ASP A  192  HIS A  199  1                                   8    
HELIX    5   5 PRO A  208  LYS A  213  1                                   6    
HELIX    6   6 THR A  240  THR A  250  1                                  11    
HELIX    7   7 PRO A  286  ASN A  289  5                                   4    
HELIX    8   8 PHE A  290  GLY A  300  1                                  11    
HELIX    9   9 ASP A  312  GLU A  317  5                                   6    
HELIX   10  10 ASN A  498  LEU A  502  5                                   5    
HELIX   11  11 PRO A  548  THR A  561  1                                  14    
HELIX   12  12 THR A  568  PHE A  578  1                                  11    
HELIX   13  13 PHE A  578  LYS A  584  1                                   7    
HELIX   14  14 HIS A  585  LYS A  587  5                                   3    
HELIX   15  15 ALA A  588  SER A  594  1                                   7    
HELIX   16  16 GLN A  600  ALA A  612  1                                  13    
HELIX   17  17 ARG A  614  SER A  620  1                                   7    
HELIX   18  18 ASP A  623  LEU A  630  1                                   8    
HELIX   19  19 ASP A  637  GLU A  649  1                                  13    
HELIX   20  20 GLU A  652  ALA A  666  1                                  15    
HELIX   21  21 VAL A  667  GLU A  670  5                                   4    
HELIX   22  22 SER A  675  ASN A  688  1                                  14    
HELIX   23  23 ASN A  688  SER A  706  1                                  19    
HELIX   24  24 TYR A  709  ARG A  722  1                                  14    
HELIX   25  25 GLY A  725  LEU A  752  1                                  28    
HELIX   26  26 SER A  760  GLN A  775  1                                  16    
HELIX   27  27 ILE A  798  CYS A  801  5                                   4    
HELIX   28  28 ASP A  837  GLU A  858  1                                  22    
HELIX   29  29 ILE A  888  VAL A  896  1                                   9    
HELIX   30  30 GLU A  905  SER A  915  1                                  11    
HELIX   31  31 THR A  917  LEU A  942  1                                  26    
HELIX   32  32 HIS A  948  ASP A  950  5                                   3    
HELIX   33  33 THR A  988  GLY A  996  1                                   9    
HELIX   34  34 SER A 1003  HIS A 1022  1                                  20    
HELIX   35  35 HIS A 1023  GLY A 1038  1                                  16    
HELIX   36  36 LYS A 1045  LEU A 1055  1                                  11    
HELIX   37  37 ASN A 1060  GLY A 1079  1                                  20    
HELIX   38  38 TRP A 1080  TRP A 1086  1                                   7    
SHEET    1   A 4 THR A 229  VAL A 235  0                                        
SHEET    2   A 4 ILE A 220  ARG A 226 -1  N  ILE A 220   O  VAL A 235           
SHEET    3   A 4 ILE A 303  ASP A 308  1  O  VAL A 305   N  HIS A 225           
SHEET    4   A 4 VAL A 271  VAL A 274 -1  N  VAL A 271   O  ASP A 308           
SHEET    1   B 3 VAL A 393  ARG A 398  0                                        
SHEET    2   B 3 THR A 380  GLN A 388 -1  N  ILE A 387   O  LEU A 394           
SHEET    3   B 3 LYS A 402  PRO A 403 -1  O  LYS A 402   N  VAL A 381           
SHEET    1   C 8 VAL A 393  ARG A 398  0                                        
SHEET    2   C 8 THR A 380  GLN A 388 -1  N  ILE A 387   O  LEU A 394           
SHEET    3   C 8 LEU A 428  TYR A 434 -1  O  GLN A 432   N  GLU A 384           
SHEET    4   C 8 TYR A 462  LEU A 467 -1  O  LEU A 466   N  LEU A 429           
SHEET    5   C 8 GLY A 478  GLN A 486 -1  O  TRP A 485   N  TYR A 463           
SHEET    6   C 8 MET A 514  LEU A 520 -1  O  MET A 514   N  MET A 484           
SHEET    7   C 8 LYS A 360  ASP A 369 -1  N  ASP A 369   O  SER A 515           
SHEET    8   C 8 GLU A 407  LYS A 419 -1  O  VAL A 408   N  ILE A 368           
SHEET    1   D 6 PHE A 783  VAL A 785  0                                        
SHEET    2   D 6 ASP A 788  LEU A 796 -1  O  ALA A 793   N  PHE A 783           
SHEET    3   D 6 LEU A 811  CYS A 817 -1  O  LYS A 816   N  ALA A 795           
SHEET    4   D 6 ILE A 828  HIS A 834 -1  O  ILE A 830   N  LEU A 813           
SHEET    5   D 6 ILE A 876  GLU A 880 -1  O  ILE A 879   N  ILE A 831           
SHEET    6   D 6 CYS A 869  SER A 871 -1  N  ILE A 870   O  MET A 878           
SHEET    1   E 3 ALA A 885  THR A 887  0                                        
SHEET    2   E 3 ILE A 952  THR A 955 -1  O  ILE A 954   N  THR A 886           
SHEET    3   E 3 LEU A 960  HIS A 962 -1  O  PHE A 961   N  MET A 953           
SITE     1 AC1 10 MET A 804  PRO A 810  TRP A 812  LYS A 833                    
SITE     2 AC1 10 GLU A 880  ILE A 881  VAL A 882  MET A 953                    
SITE     3 AC1 10 ILE A 963  ASP A 964                                          
CRYST1  140.630   67.380  105.890  90.00  96.14  90.00 C 1 2 1       4          
ORIGX1      1.000000  0.000000  0.000000        0.00000                         
ORIGX2      0.000000  1.000000  0.000000        0.00000                         
ORIGX3      0.000000  0.000000  1.000000        0.00000                         
SCALE1      0.007111  0.000000  0.000765        0.00000                         
SCALE2      0.000000  0.014841  0.000000        0.00000                         
SCALE3      0.000000  0.000000  0.009498        0.00000                         
ATOM      1  N   MET A 143     -32.303 -27.211 -50.945  1.00 90.32           N  
ATOM      2  CA  MET A 143     -33.225 -28.381 -51.021  1.00 90.32           C  
ATOM      3  C   MET A 143     -34.315 -28.153 -52.073  1.00 90.31           C  
ATOM      4  O   MET A 143     -34.013 -27.870 -53.236  1.00 90.30           O  
ATOM      5  CB  MET A 143     -33.835 -28.675 -49.644  1.00 90.30           C  
ATOM      6  N   SER A 144     -35.575 -28.270 -51.653  1.00 90.30           N  
ATOM      7  CA  SER A 144     -36.724 -28.107 -52.542  1.00 90.28           C  
ATOM      8  C   SER A 144     -36.892 -26.660 -53.009  1.00 90.25           C  
ATOM      9  O   SER A 144     -36.333 -25.736 -52.414  1.00 90.26           O  
ATOM     10  CB  SER A 144     -37.998 -28.592 -51.848  1.00 90.29           C  
ATOM     11  OG  SER A 144     -39.108 -28.540 -52.727  1.00 90.32           O  
ATOM     12  N   GLU A 145     -37.667 -26.478 -54.078  1.00 90.21           N  
ATOM     13  CA  GLU A 145     -37.929 -25.156 -54.647  1.00 90.16           C  
ATOM     14  C   GLU A 145     -38.727 -24.279 -53.679  1.00 90.12           C  
ATOM     15  O   GLU A 145     -38.555 -23.059 -53.654  1.00 90.12           O  
ATOM     16  CB  GLU A 145     -38.666 -25.290 -55.986  1.00 90.16           C  
ATOM     17  CG  GLU A 145     -38.456 -24.125 -56.959  1.00 90.20           C  
ATOM     18  CD  GLU A 145     -39.310 -22.902 -56.644  1.00 90.28           C  
ATOM     19  OE1 GLU A 145     -40.454 -23.064 -56.164  1.00 90.35           O  
ATOM     20  OE2 GLU A 145     -38.835 -21.770 -56.881  1.00 90.24           O  
ATOM     21  N   GLU A 146     -39.589 -24.913 -52.884  1.00 90.07           N  
ATOM     22  CA  GLU A 146     -40.401 -24.219 -51.882  1.00 90.01           C  
ATOM     23  C   GLU A 146     -39.537 -23.718 -50.724  1.00 89.92           C  
ATOM     24  O   GLU A 146     -39.850 -22.699 -50.103  1.00 89.90           O  
ATOM     25  CB  GLU A 146     -41.514 -25.140 -51.372  1.00 90.03           C  
ATOM     26  CG  GLU A 146     -42.687 -24.434 -50.687  1.00 90.19           C  
ATOM     27  CD  GLU A 146     -42.514 -24.291 -49.180  1.00 90.39           C  
ATOM     28  OE1 GLU A 146     -41.793 -25.114 -48.573  1.00 90.47           O  
ATOM     29  OE2 GLU A 146     -43.114 -23.359 -48.602  1.00 90.42           O  
ATOM     30  N   SER A 147     -38.450 -24.440 -50.450  1.00 89.80           N  
ATOM     31  CA  SER A 147     -37.470 -24.051 -49.434  1.00 89.68           C  
ATOM     32  C   SER A 147     -36.715 -22.786 -49.842  1.00 89.58           C  
ATOM     33  O   SER A 147     -36.293 -22.001 -48.988  1.00 89.58           O  
ATOM     34  CB  SER A 147     -36.475 -25.188 -49.186  1.00 89.69           C  
ATOM     35  OG  SER A 147     -37.142 -26.424 -48.991  1.00 89.72           O  
ATOM     36  N   GLN A 148     -36.547 -22.606 -51.152  1.00 89.41           N  
ATOM     37  CA  GLN A 148     -35.915 -21.413 -51.714  1.00 89.26           C  
ATOM     38  C   GLN A 148     -36.798 -20.184 -51.510  1.00 89.10           C  
ATOM     39  O   GLN A 148     -36.298 -19.093 -51.234  1.00 89.09           O  
ATOM     40  CB  GLN A 148     -35.633 -21.604 -53.206  1.00 89.30           C  
ATOM     41  CG  GLN A 148     -34.729 -22.787 -53.540  1.00 89.44           C  
ATOM     42  CD  GLN A 148     -34.752 -23.153 -55.017  1.00 89.63           C  
ATOM     43  OE1 GLN A 148     -35.321 -22.436 -55.844  1.00 89.76           O  
ATOM     44  NE2 GLN A 148     -34.131 -24.279 -55.353  1.00 89.66           N  
ATOM     45  N   ALA A 149     -38.110 -20.376 -51.650  1.00 88.88           N  
ATOM     46  CA  ALA A 149     -39.092 -19.310 -51.457  1.00 88.67           C  
ATOM     47  C   ALA A 149     -39.219 -18.923 -49.985  1.00 88.50           C  
ATOM     48  O   ALA A 149     -39.516 -17.771 -49.666  1.00 88.49           O  
ATOM     49  CB  ALA A 149     -40.444 -19.727 -52.017  1.00 88.69           C  
ATOM     50  N   PHE A 150     -38.997 -19.894 -49.102  1.00 88.27           N  
ATOM     51  CA  PHE A 150     -39.004 -19.665 -47.660  1.00 88.04           C  
ATOM     52  C   PHE A 150     -37.807 -18.815 -47.246  1.00 87.87           C  
ATOM     53  O   PHE A 150     -37.941 -17.895 -46.438  1.00 87.85           O  
ATOM     54  CB  PHE A 150     -38.991 -21.002 -46.916  1.00 88.05           C  
ATOM     55  CG  PHE A 150     -39.065 -20.872 -45.421  1.00 88.02           C  
ATOM     56  CD1 PHE A 150     -40.280 -20.636 -44.788  1.00 88.01           C  
ATOM     57  CD2 PHE A 150     -37.919 -21.004 -44.643  1.00 88.02           C  
ATOM     58  CE1 PHE A 150     -40.351 -20.522 -43.402  1.00 88.01           C  
ATOM     59  CE2 PHE A 150     -37.979 -20.891 -43.257  1.00 88.01           C  
ATOM     60  CZ  PHE A 150     -39.197 -20.650 -42.636  1.00 87.99           C  
ATOM     61  N   GLN A 151     -36.643 -19.137 -47.806  1.00 87.66           N  
ATOM     62  CA  GLN A 151     -35.416 -18.381 -47.571  1.00 87.45           C  
ATOM     63  C   GLN A 151     -35.512 -16.987 -48.194  1.00 87.27           C  
ATOM     64  O   GLN A 151     -35.016 -16.009 -47.630  1.00 87.25           O  
ATOM     65  CB  GLN A 151     -34.208 -19.150 -48.124  1.00 87.49           C  
ATOM     66  CG  GLN A 151     -32.840 -18.516 -47.848  1.00 87.57           C  
ATOM     67  CD  GLN A 151     -32.435 -18.545 -46.380  1.00 87.67           C  
ATOM     68  OE1 GLN A 151     -33.082 -19.183 -45.548  1.00 87.73           O  
ATOM     69  NE2 GLN A 151     -31.352 -17.850 -46.059  1.00 87.68           N  
ATOM     70  N   ARG A 152     -36.162 -16.915 -49.355  1.00 87.03           N  
ATOM     71  CA  ARG A 152     -36.433 -15.653 -50.040  1.00 86.80           C  
ATOM     72  C   ARG A 152     -37.409 -14.798 -49.225  1.00 86.56           C  
ATOM     73  O   ARG A 152     -37.326 -13.567 -49.235  1.00 86.55           O  
ATOM     74  CB  ARG A 152     -36.988 -15.931 -51.442  1.00 86.85           C  
ATOM     75  CG  ARG A 152     -37.067 -14.722 -52.361  1.00 87.00           C  
ATOM     76  CD  ARG A 152     -37.564 -15.120 -53.745  1.00 87.29           C  
ATOM     77  NE  ARG A 152     -38.105 -13.978 -54.482  1.00 87.49           N  
ATOM     78  CZ  ARG A 152     -39.400 -13.680 -54.574  1.00 87.56           C  
ATOM     79  NH1 ARG A 152     -40.313 -14.441 -53.980  1.00 87.60           N  
ATOM     80  NH2 ARG A 152     -39.785 -12.618 -55.269  1.00 87.57           N  
ATOM     81  N   GLN A 153     -38.324 -15.465 -48.521  1.00 86.25           N  
ATOM     82  CA  GLN A 153     -39.285 -14.805 -47.639  1.00 85.93           C  
ATOM     83  C   GLN A 153     -38.587 -14.221 -46.413  1.00 85.66           C  
ATOM     84  O   GLN A 153     -38.925 -13.124 -45.965  1.00 85.63           O  
ATOM     85  CB  GLN A 153     -40.376 -15.789 -47.205  1.00 85.98           C  
ATOM     86  CG  GLN A 153     -41.599 -15.143 -46.561  1.00 86.07           C  
ATOM     87  CD  GLN A 153     -42.582 -16.157 -45.990  1.00 86.24           C  
ATOM     88  OE1 GLN A 153     -43.347 -15.842 -45.079  1.00 86.31           O  
ATOM     89  NE2 GLN A 153     -42.566 -17.377 -46.524  1.00 86.28           N  
ATOM     90  N   LEU A 154     -37.616 -14.961 -45.880  1.00 85.33           N  
ATOM     91  CA  LEU A 154     -36.841 -14.519 -44.722  1.00 84.98           C  
ATOM     92  C   LEU A 154     -35.974 -13.309 -45.055  1.00 84.75           C  
ATOM     93  O   LEU A 154     -35.878 -12.371 -44.263  1.00 84.72           O  
ATOM     94  CB  LEU A 154     -35.967 -15.659 -44.184  1.00 84.98           C  
ATOM     95  CG  LEU A 154     -36.638 -16.921 -43.630  1.00 84.92           C  
ATOM     96  CD1 LEU A 154     -35.600 -18.003 -43.383  1.00 84.91           C  
ATOM     97  CD2 LEU A 154     -37.426 -16.641 -42.360  1.00 84.90           C  
ATOM     98  N   THR A 155     -35.359 -13.337 -46.236  1.00 84.44           N  
ATOM     99  CA  THR A 155     -34.478 -12.265 -46.697  1.00 84.14           C  
ATOM    100  C   THR A 155     -35.164 -10.896 -46.640  1.00 83.92           C  
ATOM    101  O   THR A 155     -34.570  -9.921 -46.178  1.00 83.91           O  
ATOM    102  CB  THR A 155     -33.959 -12.547 -48.125  1.00 84.14           C  
ATOM    103  OG1 THR A 155     -33.413 -13.870 -48.183  1.00 84.12           O  
ATOM    104  CG2 THR A 155     -32.884 -11.545 -48.525  1.00 84.11           C  
ATOM    105  N   ALA A 156     -36.415 -10.839 -47.096  1.00 83.64           N  
ATOM    106  CA  ALA A 156     -37.199  -9.605 -47.076  1.00 83.35           C  
ATOM    107  C   ALA A 156     -37.619  -9.204 -45.661  1.00 83.14           C  
ATOM    108  O   ALA A 156     -37.751  -8.015 -45.363  1.00 83.12           O  
ATOM    109  CB  ALA A 156     -38.417  -9.736 -47.978  1.00 83.36           C  
ATOM    110  N   LEU A 157     -37.823 -10.199 -44.798  1.00 82.87           N  
ATOM    111  CA  LEU A 157     -38.213  -9.967 -43.406  1.00 82.60           C  
ATOM    112  C   LEU A 157     -37.056  -9.448 -42.558  1.00 82.39           C  
ATOM    113  O   LEU A 157     -37.259  -8.640 -41.653  1.00 82.37           O  
ATOM    114  CB  LEU A 157     -38.787 -11.243 -42.784  1.00 82.62           C  
ATOM    115  CG  LEU A 157     -40.194 -11.670 -43.212  1.00 82.63           C  
ATOM    116  CD1 LEU A 157     -40.433 -13.136 -42.887  1.00 82.64           C  
ATOM    117  CD2 LEU A 157     -41.255 -10.794 -42.563  1.00 82.65           C  
ATOM    118  N   ILE A 158     -35.850  -9.925 -42.854  1.00 82.14           N  
ATOM    119  CA  ILE A 158     -34.640  -9.471 -42.174  1.00 81.90           C  
ATOM    120  C   ILE A 158     -34.226  -8.096 -42.702  1.00 81.71           C  
ATOM    121  O   ILE A 158     -33.944  -7.182 -41.924  1.00 81.69           O  
ATOM    122  CB  ILE A 158     -33.468 -10.474 -42.358  1.00 81.91           C  
ATOM    123  CG1 ILE A 158     -33.855 -11.864 -41.844  1.00 81.87           C  
ATOM    124  CG2 ILE A 158     -32.206  -9.976 -41.651  1.00 81.94           C  
ATOM    125  CD1 ILE A 158     -33.042 -12.996 -42.451  1.00 81.85           C  
ATOM    126  N   GLY A 159     -34.203  -7.963 -44.027  1.00 81.48           N  
ATOM    127  CA  GLY A 159     -33.731  -6.749 -44.687  1.00 81.18           C  
ATOM    128  C   GLY A 159     -32.322  -6.899 -45.233  1.00 80.97           C  
ATOM    129  O   GLY A 159     -31.777  -5.966 -45.823  1.00 80.96           O  
ATOM    130  N   TYR A 160     -31.735  -8.078 -45.031  1.00 80.76           N  
ATOM    131  CA  TYR A 160     -30.388  -8.387 -45.509  1.00 80.53           C  
ATOM    132  C   TYR A 160     -30.271  -9.856 -45.910  1.00 80.40           C  
ATOM    133  O   TYR A 160     -30.814 -10.737 -45.239  1.00 80.39           O  
ATOM    134  CB  TYR A 160     -29.342  -8.042 -44.441  1.00 80.53           C  
ATOM    135  CG  TYR A 160     -27.909  -8.319 -44.852  1.00 80.44           C  
ATOM    136  CD1 TYR A 160     -27.248  -7.486 -45.753  1.00 80.34           C  
ATOM    137  CD2 TYR A 160     -27.214  -9.411 -44.334  1.00 80.40           C  
ATOM    138  CE1 TYR A 160     -25.931  -7.737 -46.135  1.00 80.29           C  
ATOM    139  CE2 TYR A 160     -25.895  -9.669 -44.707  1.00 80.35           C  
ATOM    140  CZ  TYR A 160     -25.261  -8.829 -45.608  1.00 80.27           C  
ATOM    141  OH  TYR A 160     -23.959  -9.077 -45.984  1.00 80.19           O  
ATOM    142  N   ASP A 161     -29.555 -10.106 -47.004  1.00 80.20           N  
ATOM    143  CA  ASP A 161     -29.334 -11.461 -47.499  1.00 80.02           C  
ATOM    144  C   ASP A 161     -28.301 -12.194 -46.645  1.00 79.89           C  
ATOM    145  O   ASP A 161     -27.113 -11.875 -46.683  1.00 79.89           O  
ATOM    146  CB  ASP A 161     -28.900 -11.428 -48.969  1.00 80.01           C  
ATOM    147  CG  ASP A 161     -28.880 -12.806 -49.608  1.00 80.00           C  
ATOM    148  OD1 ASP A 161     -29.630 -13.698 -49.156  1.00 79.96           O  
ATOM    149  OD2 ASP A 161     -28.113 -12.992 -50.575  1.00 80.03           O  
ATOM    150  N   VAL A 162     -28.768 -13.170 -45.871  1.00 79.72           N  
ATOM    151  CA  VAL A 162     -27.901 -13.953 -44.985  1.00 79.55           C  
ATOM    152  C   VAL A 162     -27.017 -14.940 -45.745  1.00 79.43           C  
ATOM    153  O   VAL A 162     -25.907 -15.249 -45.305  1.00 79.42           O  
ATOM    154  CB  VAL A 162     -28.699 -14.710 -43.890  1.00 79.56           C  
ATOM    155  CG1 VAL A 162     -28.942 -13.813 -42.690  1.00 79.58           C  
ATOM    156  CG2 VAL A 162     -30.014 -15.254 -44.440  1.00 79.56           C  
ATOM    157  N   THR A 163     -27.510 -15.420 -46.886  1.00 79.28           N  
ATOM    158  CA  THR A 163     -26.766 -16.358 -47.731  1.00 79.13           C  
ATOM    159  C   THR A 163     -25.610 -15.685 -48.480  1.00 79.02           C  
ATOM    160  O   THR A 163     -24.773 -16.367 -49.076  1.00 79.04           O  
ATOM    161  CB  THR A 163     -27.689 -17.079 -48.741  1.00 79.13           C  
ATOM    162  OG1 THR A 163     -28.539 -16.124 -49.387  1.00 79.13           O  
ATOM    163  CG2 THR A 163     -28.550 -18.113 -48.037  1.00 79.10           C  
ATOM    164  N   ASP A 164     -25.572 -14.352 -48.437  1.00 78.84           N  
ATOM    165  CA  ASP A 164     -24.515 -13.565 -49.070  1.00 78.65           C  
ATOM    166  C   ASP A 164     -23.137 -13.965 -48.555  1.00 78.53           C  
ATOM    167  O   ASP A 164     -22.922 -14.080 -47.347  1.00 78.52           O  
ATOM    168  CB  ASP A 164     -24.753 -12.067 -48.842  1.00 78.65           C  
ATOM    169  CG  ASP A 164     -23.582 -11.206 -49.290  1.00 78.64           C  
ATOM    170  OD1 ASP A 164     -23.112 -11.376 -50.437  1.00 78.65           O  
ATOM    171  OD2 ASP A 164     -23.136 -10.355 -48.490  1.00 78.64           O  
ATOM    172  N   VAL A 165     -22.217 -14.186 -49.490  1.00 78.38           N  
ATOM    173  CA  VAL A 165     -20.838 -14.554 -49.165  1.00 78.22           C  
ATOM    174  C   VAL A 165     -19.822 -13.744 -49.983  1.00 78.12           C  
ATOM    175  O   VAL A 165     -18.814 -14.278 -50.455  1.00 78.11           O  
ATOM    176  CB  VAL A 165     -20.587 -16.086 -49.307  1.00 78.22           C  
ATOM    177  CG1 VAL A 165     -21.061 -16.828 -48.063  1.00 78.19           C  
ATOM    178  CG2 VAL A 165     -21.256 -16.643 -50.560  1.00 78.21           C  
ATOM    179  N   SER A 166     -20.097 -12.449 -50.129  1.00 77.98           N  
ATOM    180  CA  SER A 166     -19.227 -11.537 -50.872  1.00 77.84           C  
ATOM    181  C   SER A 166     -18.379 -10.669 -49.943  1.00 77.73           C  
ATOM    182  O   SER A 166     -17.259 -10.288 -50.292  1.00 77.72           O  
ATOM    183  CB  SER A 166     -20.054 -10.649 -51.805  1.00 77.85           C  
ATOM    184  OG  SER A 166     -20.992  -9.876 -51.078  1.00 77.85           O  
ATOM    185  N   ASN A 167     -18.922 -10.363 -48.766  1.00 77.58           N  
ATOM    186  CA  ASN A 167     -18.246  -9.509 -47.790  1.00 77.44           C  
ATOM    187  C   ASN A 167     -17.572 -10.302 -46.662  1.00 77.33           C  
ATOM    188  O   ASN A 167     -17.304  -9.765 -45.583  1.00 77.31           O  
ATOM    189  CB  ASN A 167     -19.231  -8.474 -47.228  1.00 77.46           C  
ATOM    190  CG  ASN A 167     -18.544  -7.377 -46.430  1.00 77.44           C  
ATOM    191  OD1 ASN A 167     -17.511  -6.844 -46.837  1.00 77.48           O  
ATOM    192  ND2 ASN A 167     -19.121  -7.037 -45.285  1.00 77.40           N  
ATOM    193  N   VAL A 168     -17.287 -11.576 -46.924  1.00 77.20           N  
ATOM    194  CA  VAL A 168     -16.641 -12.444 -45.936  1.00 77.09           C  
ATOM    195  C   VAL A 168     -15.357 -13.098 -46.442  1.00 77.01           C  
ATOM    196  O   VAL A 168     -15.244 -13.453 -47.617  1.00 77.00           O  
ATOM    197  CB  VAL A 168     -17.594 -13.540 -45.399  1.00 77.09           C  
ATOM    198  CG1 VAL A 168     -18.566 -12.956 -44.392  1.00 77.10           C  
ATOM    199  CG2 VAL A 168     -18.334 -14.229 -46.537  1.00 77.10           C  
ATOM    200  N   HIS A 169     -14.397 -13.247 -45.532  1.00 76.93           N  
ATOM    201  CA  HIS A 169     -13.119 -13.903 -45.813  1.00 76.84           C  
ATOM    202  C   HIS A 169     -13.058 -15.293 -45.177  1.00 76.77           C  
ATOM    203  O   HIS A 169     -12.140 -16.070 -45.445  1.00 76.75           O  
ATOM    204  CB  HIS A 169     -11.948 -13.036 -45.328  1.00 76.84           C  
ATOM    205  CG  HIS A 169     -12.169 -12.415 -43.983  1.00 76.83           C  
ATOM    206  ND1 HIS A 169     -12.610 -11.119 -43.826  1.00 76.83           N  
ATOM    207  CD2 HIS A 169     -12.018 -12.915 -42.733  1.00 76.83           C  
ATOM    208  CE1 HIS A 169     -12.719 -10.846 -42.538  1.00 76.82           C  
ATOM    209  NE2 HIS A 169     -12.367 -11.919 -41.854  1.00 76.81           N  
ATOM    210  N   ASP A 170     -14.042 -15.591 -44.333  1.00 76.69           N  
ATOM    211  CA  ASP A 170     -14.138 -16.883 -43.662  1.00 76.64           C  
ATOM    212  C   ASP A 170     -15.592 -17.350 -43.574  1.00 76.60           C  
ATOM    213  O   ASP A 170     -16.480 -16.761 -44.194  1.00 76.60           O  
ATOM    214  CB  ASP A 170     -13.494 -16.816 -42.271  1.00 76.65           C  
ATOM    215  CG  ASP A 170     -14.235 -15.890 -41.319  1.00 76.68           C  
ATOM    216  OD1 ASP A 170     -14.871 -14.917 -41.781  1.00 76.87           O  
ATOM    217  OD2 ASP A 170     -14.173 -16.138 -40.097  1.00 76.70           O  
ATOM    218  N   ASP A 171     -15.828 -18.403 -42.796  1.00 76.53           N  
ATOM    219  CA  ASP A 171     -17.149 -19.016 -42.696  1.00 76.49           C  
ATOM    220  C   ASP A 171     -17.747 -18.880 -41.296  1.00 76.48           C  
ATOM    221  O   ASP A 171     -18.466 -19.768 -40.830  1.00 76.50           O  
ATOM    222  CB  ASP A 171     -17.073 -20.493 -43.105  1.00 76.48           C  
ATOM    223  CG  ASP A 171     -16.191 -21.319 -42.175  1.00 76.45           C  
ATOM    224  OD1 ASP A 171     -16.544 -22.486 -41.909  1.00 76.50           O  
ATOM    225  OD2 ASP A 171     -15.155 -20.804 -41.699  1.00 76.39           O  
ATOM    226  N   GLU A 172     -17.457 -17.761 -40.635  1.00 76.46           N  
ATOM    227  CA  GLU A 172     -17.944 -17.517 -39.275  1.00 76.43           C  
ATOM    228  C   GLU A 172     -19.456 -17.310 -39.228  1.00 76.41           C  
ATOM    229  O   GLU A 172     -20.097 -17.630 -38.227  1.00 76.39           O  
ATOM    230  CB  GLU A 172     -17.224 -16.325 -38.643  1.00 76.43           C  
ATOM    231  CG  GLU A 172     -17.276 -16.318 -37.119  1.00 76.47           C  
ATOM    232  CD  GLU A 172     -16.443 -15.214 -36.494  1.00 76.54           C  
ATOM    233  OE1 GLU A 172     -15.594 -14.617 -37.194  1.00 76.57           O  
ATOM    234  OE2 GLU A 172     -16.643 -14.947 -35.290  1.00 76.51           O  
ATOM    235  N   LEU A 173     -20.015 -16.778 -40.314  1.00 76.42           N  
ATOM    236  CA  LEU A 173     -21.460 -16.596 -40.435  1.00 76.42           C  
ATOM    237  C   LEU A 173     -22.185 -17.933 -40.535  1.00 76.44           C  
ATOM    238  O   LEU A 173     -23.133 -18.185 -39.789  1.00 76.44           O  
ATOM    239  CB  LEU A 173     -21.805 -15.732 -41.652  1.00 76.41           C  
ATOM    240  CG  LEU A 173     -21.395 -14.258 -41.689  1.00 76.36           C  
ATOM    241  CD1 LEU A 173     -21.958 -13.610 -42.945  1.00 76.43           C  
ATOM    242  CD2 LEU A 173     -21.866 -13.511 -40.454  1.00 76.31           C  
ATOM    243  N   GLU A 174     -21.725 -18.782 -41.454  1.00 76.46           N  
ATOM    244  CA  GLU A 174     -22.345 -20.083 -41.714  1.00 76.49           C  
ATOM    245  C   GLU A 174     -22.189 -21.065 -40.553  1.00 76.50           C  
ATOM    246  O   GLU A 174     -23.080 -21.880 -40.304  1.00 76.51           O  
ATOM    247  CB  GLU A 174     -21.786 -20.696 -43.000  1.00 76.49           C  
ATOM    248  CG  GLU A 174     -22.255 -20.011 -44.284  1.00 76.50           C  
ATOM    249  CD  GLU A 174     -23.707 -20.311 -44.636  1.00 76.52           C  
ATOM    250  OE1 GLU A 174     -24.248 -21.345 -44.181  1.00 76.49           O  
ATOM    251  OE2 GLU A 174     -24.305 -19.506 -45.380  1.00 76.60           O  
ATOM    252  N   PHE A 175     -21.055 -20.985 -39.860  1.00 76.52           N  
ATOM    253  CA  PHE A 175     -20.804 -21.793 -38.667  1.00 76.56           C  
ATOM    254  C   PHE A 175     -21.757 -21.390 -37.544  1.00 76.55           C  
ATOM    255  O   PHE A 175     -22.326 -22.247 -36.863  1.00 76.54           O  
ATOM    256  CB  PHE A 175     -19.344 -21.646 -38.216  1.00 76.59           C  
ATOM    257  CG  PHE A 175     -19.044 -22.289 -36.884  1.00 76.74           C  
ATOM    258  CD1 PHE A 175     -18.707 -23.639 -36.806  1.00 76.84           C  
ATOM    259  CD2 PHE A 175     -19.089 -21.539 -35.706  1.00 76.85           C  
ATOM    260  CE1 PHE A 175     -18.427 -24.236 -35.574  1.00 76.88           C  
ATOM    261  CE2 PHE A 175     -18.812 -22.126 -34.471  1.00 76.88           C  
ATOM    262  CZ  PHE A 175     -18.480 -23.476 -34.405  1.00 76.90           C  
ATOM    263  N   THR A 176     -21.915 -20.079 -37.361  1.00 76.55           N  
ATOM    264  CA  THR A 176     -22.829 -19.515 -36.370  1.00 76.53           C  
ATOM    265  C   THR A 176     -24.282 -19.808 -36.744  1.00 76.51           C  
ATOM    266  O   THR A 176     -25.104 -20.112 -35.879  1.00 76.49           O  
ATOM    267  CB  THR A 176     -22.610 -17.992 -36.223  1.00 76.54           C  
ATOM    268  OG1 THR A 176     -21.265 -17.744 -35.798  1.00 76.59           O  
ATOM    269  CG2 THR A 176     -23.573 -17.385 -35.212  1.00 76.51           C  
ATOM    270  N   ARG A 177     -24.577 -19.728 -38.040  1.00 76.48           N  
ATOM    271  CA  ARG A 177     -25.917 -19.978 -38.565  1.00 76.44           C  
ATOM    272  C   ARG A 177     -26.378 -21.404 -38.279  1.00 76.39           C  
ATOM    273  O   ARG A 177     -27.544 -21.632 -37.951  1.00 76.40           O  
ATOM    274  CB  ARG A 177     -25.948 -19.708 -40.067  1.00 76.46           C  
ATOM    275  CG  ARG A 177     -27.262 -19.150 -40.565  1.00 76.56           C  
ATOM    276  CD  ARG A 177     -27.137 -18.650 -41.992  1.00 76.72           C  
ATOM    277  NE  ARG A 177     -27.242 -19.731 -42.969  1.00 76.81           N  
ATOM    278  CZ  ARG A 177     -27.431 -19.552 -44.274  1.00 76.91           C  
ATOM    279  NH1 ARG A 177     -27.543 -18.327 -44.778  1.00 76.93           N  
ATOM    280  NH2 ARG A 177     -27.513 -20.603 -45.081  1.00 77.03           N  
ATOM    281  N   ARG A 178     -25.453 -22.353 -38.401  1.00 76.34           N  
ATOM    282  CA  ARG A 178     -25.734 -23.756 -38.113  1.00 76.29           C  
ATOM    283  C   ARG A 178     -25.561 -24.077 -36.630  1.00 76.23           C  
ATOM    284  O   ARG A 178     -26.187 -25.004 -36.112  1.00 76.24           O  
ATOM    285  CB  ARG A 178     -24.855 -24.674 -38.966  1.00 76.31           C  
ATOM    286  CG  ARG A 178     -25.205 -24.663 -40.446  1.00 76.41           C  
ATOM    287  CD  ARG A 178     -24.388 -25.682 -41.215  1.00 76.58           C  
ATOM    288  NE  ARG A 178     -24.557 -25.535 -42.658  1.00 76.75           N  
ATOM    289  CZ  ARG A 178     -23.811 -24.747 -43.428  1.00 76.90           C  
ATOM    290  NH1 ARG A 178     -22.832 -24.021 -42.901  1.00 76.93           N  
ATOM    291  NH2 ARG A 178     -24.044 -24.683 -44.732  1.00 77.05           N  
ATOM    292  N   GLY A 179     -24.714 -23.304 -35.954  1.00 76.15           N  
ATOM    293  CA  GLY A 179     -24.484 -23.467 -34.522  1.00 76.08           C  
ATOM    294  C   GLY A 179     -25.663 -23.016 -33.679  1.00 76.01           C  
ATOM    295  O   GLY A 179     -25.767 -23.378 -32.506  1.00 76.00           O  
ATOM    296  N   LEU A 180     -26.549 -22.228 -34.285  1.00 75.97           N  
ATOM    297  CA  LEU A 180     -27.731 -21.702 -33.606  1.00 75.93           C  
ATOM    298  C   LEU A 180     -28.968 -22.567 -33.839  1.00 75.90           C  
ATOM    299  O   LEU A 180     -30.002 -22.364 -33.199  1.00 75.91           O  
ATOM    300  CB  LEU A 180     -28.005 -20.257 -34.043  1.00 75.94           C  
ATOM    301  CG  LEU A 180     -27.063 -19.151 -33.553  1.00 75.94           C  
ATOM    302  CD1 LEU A 180     -27.262 -17.883 -34.370  1.00 75.91           C  
ATOM    303  CD2 LEU A 180     -27.246 -18.869 -32.066  1.00 75.92           C  
ATOM    304  N   VAL A 181     -28.850 -23.532 -34.749  1.00 75.86           N  
ATOM    305  CA  VAL A 181     -29.944 -24.451 -35.071  1.00 75.81           C  
ATOM    306  C   VAL A 181     -30.328 -25.300 -33.855  1.00 75.79           C  
ATOM    307  O   VAL A 181     -31.512 -25.522 -33.595  1.00 75.78           O  
ATOM    308  CB  VAL A 181     -29.590 -25.359 -36.282  1.00 75.82           C  
ATOM    309  CG1 VAL A 181     -30.713 -26.342 -36.582  1.00 75.78           C  
ATOM    310  CG2 VAL A 181     -29.295 -24.516 -37.514  1.00 75.80           C  
ATOM    311  N   THR A 182     -29.321 -25.753 -33.112  1.00 75.76           N  
ATOM    312  CA  THR A 182     -29.538 -26.571 -31.918  1.00 75.75           C  
ATOM    313  C   THR A 182     -30.241 -25.804 -30.783  1.00 75.76           C  
ATOM    314  O   THR A 182     -31.276 -26.262 -30.299  1.00 75.77           O  
ATOM    315  CB  THR A 182     -28.226 -27.242 -31.420  1.00 75.75           C  
ATOM    316  OG1 THR A 182     -27.558 -27.870 -32.521  1.00 75.74           O  
ATOM    317  CG2 THR A 182     -28.517 -28.289 -30.352  1.00 75.72           C  
ATOM    318  N   PRO A 183     -29.696 -24.636 -30.365  1.00 75.77           N  
ATOM    319  CA  PRO A 183     -30.347 -23.846 -29.310  1.00 75.78           C  
ATOM    320  C   PRO A 183     -31.729 -23.300 -29.681  1.00 75.81           C  
ATOM    321  O   PRO A 183     -32.516 -22.977 -28.787  1.00 75.80           O  
ATOM    322  CB  PRO A 183     -29.371 -22.686 -29.085  1.00 75.77           C  
ATOM    323  CG  PRO A 183     -28.063 -23.201 -29.546  1.00 75.76           C  
ATOM    324  CD  PRO A 183     -28.387 -24.059 -30.724  1.00 75.77           C  
ATOM    325  N   ARG A 184     -32.013 -23.187 -30.979  1.00 75.87           N  
ATOM    326  CA  ARG A 184     -33.340 -22.783 -31.445  1.00 75.94           C  
ATOM    327  C   ARG A 184     -34.347 -23.903 -31.216  1.00 76.02           C  
ATOM    328  O   ARG A 184     -35.362 -23.707 -30.544  1.00 76.03           O  
ATOM    329  CB  ARG A 184     -33.317 -22.388 -32.926  1.00 75.91           C  
ATOM    330  CG  ARG A 184     -34.703 -22.145 -33.526  1.00 75.87           C  
ATOM    331  CD  ARG A 184     -34.645 -21.563 -34.929  1.00 75.88           C  
ATOM    332  NE  ARG A 184     -34.158 -22.521 -35.918  1.00 75.91           N  
ATOM    333  CZ  ARG A 184     -32.926 -22.531 -36.420  1.00 75.96           C  
ATOM    334  NH1 ARG A 184     -32.030 -21.632 -36.033  1.00 75.96           N  
ATOM    335  NH2 ARG A 184     -32.587 -23.445 -37.316  1.00 76.02           N  
ATOM    336  N   MET A 185     -34.051 -25.076 -31.773  1.00 76.12           N  
ATOM    337  CA  MET A 185     -34.929 -26.234 -31.657  1.00 76.20           C  
ATOM    338  C   MET A 185     -34.984 -26.747 -30.218  1.00 76.26           C  
ATOM    339  O   MET A 185     -35.968 -27.369 -29.817  1.00 76.26           O  
ATOM    340  CB  MET A 185     -34.504 -27.336 -32.631  1.00 76.18           C  
ATOM    341  CG  MET A 185     -34.455 -26.875 -34.089  1.00 76.25           C  
ATOM    342  SD  MET A 185     -34.327 -28.189 -35.320  1.00 76.40           S  
ATOM    343  CE  MET A 185     -32.741 -28.927 -34.919  1.00 76.40           C  
ATOM    344  N   ALA A 186     -33.936 -26.457 -29.445  1.00 76.34           N  
ATOM    345  CA  ALA A 186     -33.893 -26.788 -28.018  1.00 76.45           C  
ATOM    346  C   ALA A 186     -34.796 -25.880 -27.183  1.00 76.55           C  
ATOM    347  O   ALA A 186     -34.977 -26.101 -25.984  1.00 76.54           O  
ATOM    348  CB  ALA A 186     -32.463 -26.737 -27.497  1.00 76.43           C  
ATOM    349  N   GLU A 187     -35.353 -24.857 -27.827  1.00 76.71           N  
ATOM    350  CA  GLU A 187     -36.256 -23.917 -27.174  1.00 76.86           C  
ATOM    351  C   GLU A 187     -37.667 -24.034 -27.745  1.00 76.97           C  
ATOM    352  O   GLU A 187     -38.650 -23.936 -27.008  1.00 76.94           O  
ATOM    353  CB  GLU A 187     -35.731 -22.487 -27.322  1.00 76.86           C  
ATOM    354  CG  GLU A 187     -36.334 -21.489 -26.339  1.00 76.91           C  
ATOM    355  CD  GLU A 187     -35.912 -21.732 -24.897  1.00 76.96           C  
ATOM    356  OE1 GLU A 187     -34.759 -22.160 -24.666  1.00 77.03           O  
ATOM    357  OE2 GLU A 187     -36.737 -21.485 -23.990  1.00 76.89           O  
ATOM    358  N   VAL A 188     -37.750 -24.244 -29.059  1.00 77.16           N  
ATOM    359  CA  VAL A 188     -39.022 -24.452 -29.756  1.00 77.36           C  
ATOM    360  C   VAL A 188     -39.708 -25.730 -29.267  1.00 77.52           C  
ATOM    361  O   VAL A 188     -40.880 -25.707 -28.878  1.00 77.54           O  
ATOM    362  CB  VAL A 188     -38.823 -24.504 -31.296  1.00 77.33           C  
ATOM    363  CG1 VAL A 188     -40.086 -24.982 -32.003  1.00 77.32           C  
ATOM    364  CG2 VAL A 188     -38.409 -23.144 -31.824  1.00 77.35           C  
ATOM    365  N   ALA A 189     -38.964 -26.833 -29.272  1.00 77.72           N  
ATOM    366  CA  ALA A 189     -39.484 -28.125 -28.835  1.00 77.92           C  
ATOM    367  C   ALA A 189     -39.511 -28.255 -27.310  1.00 78.08           C  
ATOM    368  O   ALA A 189     -39.760 -29.340 -26.777  1.00 78.09           O  
ATOM    369  CB  ALA A 189     -38.677 -29.258 -29.460  1.00 77.91           C  
ATOM    370  N   SER A 190     -39.267 -27.142 -26.618  1.00 78.30           N  
ATOM    371  CA  SER A 190     -39.253 -27.108 -25.155  1.00 78.52           C  
ATOM    372  C   SER A 190     -40.371 -26.247 -24.565  1.00 78.69           C  
ATOM    373  O   SER A 190     -40.749 -26.426 -23.405  1.00 78.69           O  
ATOM    374  CB  SER A 190     -37.895 -26.614 -24.649  1.00 78.51           C  
ATOM    375  OG  SER A 190     -37.868 -26.544 -23.234  1.00 78.53           O  
ATOM    376  N   ARG A 191     -40.887 -25.314 -25.361  1.00 78.92           N  
ATOM    377  CA  ARG A 191     -41.932 -24.397 -24.905  1.00 79.16           C  
ATOM    378  C   ARG A 191     -43.318 -25.047 -24.901  1.00 79.32           C  
ATOM    379  O   ARG A 191     -43.577 -25.987 -25.655  1.00 79.32           O  
ATOM    380  CB  ARG A 191     -41.942 -23.119 -25.757  1.00 79.15           C  
ATOM    381  CG  ARG A 191     -42.472 -23.301 -27.175  1.00 79.22           C  
ATOM    382  CD  ARG A 191     -42.165 -22.100 -28.050  1.00 79.32           C  
ATOM    383  NE  ARG A 191     -42.600 -22.313 -29.430  1.00 79.49           N  
ATOM    384  CZ  ARG A 191     -42.204 -21.586 -30.473  1.00 79.56           C  
ATOM    385  NH1 ARG A 191     -41.351 -20.581 -30.316  1.00 79.61           N  
ATOM    386  NH2 ARG A 191     -42.666 -21.868 -31.684  1.00 79.59           N  
ATOM    387  N   ASP A 192     -44.197 -24.535 -24.042  1.00 79.57           N  
ATOM    388  CA  ASP A 192     -45.594 -24.960 -23.995  1.00 79.83           C  
ATOM    389  C   ASP A 192     -46.364 -24.308 -25.147  1.00 80.03           C  
ATOM    390  O   ASP A 192     -46.407 -23.079 -25.241  1.00 80.09           O  
ATOM    391  CB  ASP A 192     -46.217 -24.579 -22.646  1.00 79.81           C  
ATOM    392  CG  ASP A 192     -47.610 -25.163 -22.450  1.00 79.81           C  
ATOM    393  OD1 ASP A 192     -48.529 -24.823 -23.227  1.00 79.76           O  
ATOM    394  OD2 ASP A 192     -47.793 -25.948 -21.495  1.00 79.82           O  
ATOM    395  N   PRO A 193     -46.982 -25.129 -26.020  1.00 80.21           N  
ATOM    396  CA  PRO A 193     -47.667 -24.633 -27.220  1.00 80.35           C  
ATOM    397  C   PRO A 193     -48.817 -23.667 -26.917  1.00 80.53           C  
ATOM    398  O   PRO A 193     -49.003 -22.691 -27.647  1.00 80.52           O  
ATOM    399  CB  PRO A 193     -48.195 -25.912 -27.881  1.00 80.34           C  
ATOM    400  CG  PRO A 193     -48.243 -26.923 -26.786  1.00 80.28           C  
ATOM    401  CD  PRO A 193     -47.097 -26.592 -25.889  1.00 80.20           C  
ATOM    402  N   LYS A 194     -49.563 -23.940 -25.847  1.00 80.76           N  
ATOM    403  CA  LYS A 194     -50.706 -23.113 -25.453  1.00 81.00           C  
ATOM    404  C   LYS A 194     -50.268 -21.810 -24.788  1.00 81.17           C  
ATOM    405  O   LYS A 194     -50.741 -20.735 -25.156  1.00 81.21           O  
ATOM    406  CB  LYS A 194     -51.651 -23.885 -24.522  1.00 81.00           C  
ATOM    407  CG  LYS A 194     -52.374 -25.060 -25.172  1.00 81.05           C  
ATOM    408  CD  LYS A 194     -53.333 -25.727 -24.190  1.00 81.09           C  
ATOM    409  CE  LYS A 194     -53.805 -27.087 -24.692  1.00 81.07           C  
ATOM    410  NZ  LYS A 194     -52.738 -28.130 -24.603  1.00 80.99           N  
ATOM    411  N   LEU A 195     -49.362 -21.915 -23.817  1.00 81.37           N  
ATOM    412  CA  LEU A 195     -48.883 -20.753 -23.069  1.00 81.60           C  
ATOM    413  C   LEU A 195     -48.111 -19.765 -23.941  1.00 81.78           C  
ATOM    414  O   LEU A 195     -48.169 -18.558 -23.711  1.00 81.80           O  
ATOM    415  CB  LEU A 195     -48.029 -21.193 -21.877  1.00 81.58           C  
ATOM    416  CG  LEU A 195     -48.751 -21.871 -20.707  1.00 81.61           C  
ATOM    417  CD1 LEU A 195     -47.760 -22.620 -19.829  1.00 81.63           C  
ATOM    418  CD2 LEU A 195     -49.548 -20.864 -19.880  1.00 81.59           C  
ATOM    419  N   TYR A 196     -47.399 -20.284 -24.940  1.00 82.01           N  
ATOM    420  CA  TYR A 196     -46.652 -19.451 -25.882  1.00 82.25           C  
ATOM    421  C   TYR A 196     -47.583 -18.711 -26.839  1.00 82.44           C  
ATOM    422  O   TYR A 196     -47.304 -17.577 -27.229  1.00 82.47           O  
ATOM    423  CB  TYR A 196     -45.640 -20.297 -26.663  1.00 82.25           C  
ATOM    424  CG  TYR A 196     -44.885 -19.553 -27.747  1.00 82.29           C  
ATOM    425  CD1 TYR A 196     -43.872 -18.647 -27.428  1.00 82.32           C  
ATOM    426  CD2 TYR A 196     -45.177 -19.766 -29.094  1.00 82.31           C  
ATOM    427  CE1 TYR A 196     -43.178 -17.966 -28.424  1.00 82.32           C  
ATOM    428  CE2 TYR A 196     -44.489 -19.092 -30.096  1.00 82.28           C  
ATOM    429  CZ  TYR A 196     -43.492 -18.197 -29.755  1.00 82.31           C  
ATOM    430  OH  TYR A 196     -42.808 -17.536 -30.747  1.00 82.36           O  
ATOM    431  N   ALA A 197     -48.685 -19.359 -27.207  1.00 82.67           N  
ATOM    432  CA  ALA A 197     -49.674 -18.766 -28.102  1.00 82.92           C  
ATOM    433  C   ALA A 197     -50.342 -17.538 -27.485  1.00 83.11           C  
ATOM    434  O   ALA A 197     -50.555 -16.535 -28.168  1.00 83.10           O  
ATOM    435  CB  ALA A 197     -50.715 -19.802 -28.505  1.00 82.90           C  
ATOM    436  N   MET A 198     -50.648 -17.622 -26.192  1.00 83.37           N  
ATOM    437  CA  MET A 198     -51.360 -16.558 -25.483  1.00 83.66           C  
ATOM    438  C   MET A 198     -50.421 -15.499 -24.906  1.00 83.88           C  
ATOM    439  O   MET A 198     -50.847 -14.382 -24.614  1.00 83.91           O  
ATOM    440  CB  MET A 198     -52.246 -17.147 -24.379  1.00 83.67           C  
ATOM    441  CG  MET A 198     -53.442 -17.945 -24.896  1.00 83.73           C  
ATOM    442  SD  MET A 198     -54.431 -18.724 -23.602  1.00 83.83           S  
ATOM    443  CE  MET A 198     -53.377 -20.089 -23.105  1.00 83.79           C  
ATOM    444  N   HIS A 199     -49.147 -15.861 -24.758  1.00 84.16           N  
ATOM    445  CA  HIS A 199     -48.092 -14.982 -24.220  1.00 84.44           C  
ATOM    446  C   HIS A 199     -48.478 -14.133 -22.990  1.00 84.70           C  
ATOM    447  O   HIS A 199     -48.284 -12.915 -22.991  1.00 84.69           O  
ATOM    448  CB  HIS A 199     -47.477 -14.113 -25.335  1.00 84.40           C  
ATOM    449  CG  HIS A 199     -48.414 -13.093 -25.911  1.00 84.35           C  
ATOM    450  ND1 HIS A 199     -49.294 -13.382 -26.932  1.00 84.30           N  
ATOM    451  CD2 HIS A 199     -48.596 -11.783 -25.619  1.00 84.26           C  
ATOM    452  CE1 HIS A 199     -49.983 -12.297 -27.238  1.00 84.24           C  
ATOM    453  NE2 HIS A 199     -49.580 -11.313 -26.454  1.00 84.24           N  
ATOM    454  N   PRO A 200     -48.998 -14.777 -21.924  1.00 84.99           N  
ATOM    455  CA  PRO A 200     -49.449 -14.002 -20.766  1.00 85.25           C  
ATOM    456  C   PRO A 200     -48.306 -13.234 -20.100  1.00 85.54           C  
ATOM    457  O   PRO A 200     -47.456 -13.828 -19.433  1.00 85.55           O  
ATOM    458  CB  PRO A 200     -50.021 -15.069 -19.826  1.00 85.24           C  
ATOM    459  CG  PRO A 200     -49.344 -16.329 -20.217  1.00 85.12           C  
ATOM    460  CD  PRO A 200     -49.110 -16.229 -21.690  1.00 85.00           C  
ATOM    461  N   TRP A 201     -48.289 -11.920 -20.303  1.00 85.91           N  
ATOM    462  CA  TRP A 201     -47.245 -11.055 -19.759  1.00 86.30           C  
ATOM    463  C   TRP A 201     -47.486 -10.781 -18.275  1.00 86.59           C  
ATOM    464  O   TRP A 201     -48.473 -10.145 -17.899  1.00 86.62           O  
ATOM    465  CB  TRP A 201     -47.151  -9.761 -20.579  1.00 86.28           C  
ATOM    466  CG  TRP A 201     -46.236  -8.698 -20.022  1.00 86.30           C  
ATOM    467  CD1 TRP A 201     -45.090  -8.887 -19.298  1.00 86.32           C  
ATOM    468  CD2 TRP A 201     -46.380  -7.280 -20.180  1.00 86.31           C  
ATOM    469  NE1 TRP A 201     -44.527  -7.675 -18.978  1.00 86.33           N  
ATOM    470  CE2 TRP A 201     -45.295  -6.672 -19.510  1.00 86.33           C  
ATOM    471  CE3 TRP A 201     -47.325  -6.463 -20.817  1.00 86.27           C  
ATOM    472  CZ2 TRP A 201     -45.127  -5.283 -19.457  1.00 86.33           C  
ATOM    473  CZ3 TRP A 201     -47.159  -5.082 -20.764  1.00 86.22           C  
ATOM    474  CH2 TRP A 201     -46.067  -4.508 -20.089  1.00 86.28           C  
ATOM    475  N   VAL A 202     -46.567 -11.271 -17.445  1.00 86.98           N  
ATOM    476  CA  VAL A 202     -46.723 -11.261 -15.989  1.00 87.38           C  
ATOM    477  C   VAL A 202     -45.445 -10.800 -15.278  1.00 87.68           C  
ATOM    478  O   VAL A 202     -44.332 -11.101 -15.718  1.00 87.71           O  
ATOM    479  CB  VAL A 202     -47.140 -12.670 -15.469  1.00 87.35           C  
ATOM    480  CG1 VAL A 202     -47.011 -12.768 -13.955  1.00 87.42           C  
ATOM    481  CG2 VAL A 202     -48.561 -13.011 -15.900  1.00 87.37           C  
ATOM    482  N   THR A 203     -45.620 -10.067 -14.179  1.00 88.08           N  
ATOM    483  CA  THR A 203     -44.511  -9.682 -13.304  1.00 88.48           C  
ATOM    484  C   THR A 203     -44.583 -10.404 -11.951  1.00 88.80           C  
ATOM    485  O   THR A 203     -45.669 -10.733 -11.474  1.00 88.84           O  
ATOM    486  CB  THR A 203     -44.443  -8.145 -13.095  1.00 88.46           C  
ATOM    487  OG1 THR A 203     -43.273  -7.812 -12.340  1.00 88.46           O  
ATOM    488  CG2 THR A 203     -45.683  -7.618 -12.367  1.00 88.46           C  
ATOM    489  N   SER A 204     -43.424 -10.650 -11.344  1.00 89.19           N  
ATOM    490  CA  SER A 204     -43.358 -11.356 -10.061  1.00 89.58           C  
ATOM    491  C   SER A 204     -42.984 -10.451  -8.887  1.00 89.89           C  
ATOM    492  O   SER A 204     -42.973 -10.892  -7.736  1.00 89.93           O  
ATOM    493  CB  SER A 204     -42.396 -12.545 -10.144  1.00 89.54           C  
ATOM    494  OG  SER A 204     -42.900 -13.547 -11.009  1.00 89.55           O  
ATOM    495  N   LYS A 205     -42.682  -9.188  -9.183  1.00 90.31           N  
ATOM    496  CA  LYS A 205     -42.365  -8.198  -8.153  1.00 90.72           C  
ATOM    497  C   LYS A 205     -43.605  -7.894  -7.309  1.00 91.05           C  
ATOM    498  O   LYS A 205     -44.728  -7.995  -7.808  1.00 91.06           O  
ATOM    499  CB  LYS A 205     -41.820  -6.905  -8.777  1.00 90.69           C  
ATOM    500  CG  LYS A 205     -40.457  -7.034  -9.454  1.00 90.67           C  
ATOM    501  CD  LYS A 205     -40.609  -7.338 -10.933  1.00 90.58           C  
ATOM    502  CE  LYS A 205     -39.296  -7.723 -11.576  1.00 90.53           C  
ATOM    503  NZ  LYS A 205     -39.533  -8.207 -12.963  1.00 90.53           N  
ATOM    504  N   PRO A 206     -43.406  -7.533  -6.024  1.00 91.41           N  
ATOM    505  CA  PRO A 206     -44.532  -7.195  -5.150  1.00 91.71           C  
ATOM    506  C   PRO A 206     -45.247  -5.922  -5.593  1.00 92.04           C  
ATOM    507  O   PRO A 206     -44.621  -5.021  -6.158  1.00 92.05           O  
ATOM    508  CB  PRO A 206     -43.866  -6.981  -3.786  1.00 91.68           C  
ATOM    509  CG  PRO A 206     -42.450  -6.649  -4.100  1.00 91.55           C  
ATOM    510  CD  PRO A 206     -42.122  -7.472  -5.302  1.00 91.42           C  
ATOM    511  N   LEU A 207     -46.551  -5.867  -5.336  1.00 92.47           N  
ATOM    512  CA  LEU A 207     -47.378  -4.724  -5.705  1.00 92.90           C  
ATOM    513  C   LEU A 207     -47.050  -3.519  -4.818  1.00 93.23           C  
ATOM    514  O   LEU A 207     -47.148  -3.609  -3.591  1.00 93.24           O  
ATOM    515  CB  LEU A 207     -48.858  -5.098  -5.606  1.00 92.89           C  
ATOM    516  CG  LEU A 207     -49.886  -4.276  -6.386  1.00 92.95           C  
ATOM    517  CD1 LEU A 207     -50.973  -5.185  -6.948  1.00 93.03           C  
ATOM    518  CD2 LEU A 207     -50.488  -3.175  -5.521  1.00 92.96           C  
ATOM    519  N   PRO A 208     -46.658  -2.389  -5.439  1.00 93.59           N  
ATOM    520  CA  PRO A 208     -46.175  -1.202  -4.721  1.00 93.91           C  
ATOM    521  C   PRO A 208     -47.239  -0.497  -3.874  1.00 94.25           C  
ATOM    522  O   PRO A 208     -48.436  -0.741  -4.042  1.00 94.29           O  
ATOM    523  CB  PRO A 208     -45.692  -0.283  -5.848  1.00 93.89           C  
ATOM    524  CG  PRO A 208     -46.461  -0.706  -7.039  1.00 93.75           C  
ATOM    525  CD  PRO A 208     -46.646  -2.185  -6.900  1.00 93.60           C  
ATOM    526  N   GLU A 209     -46.780   0.377  -2.981  1.00 94.66           N  
ATOM    527  CA  GLU A 209     -47.642   1.073  -2.022  1.00 95.08           C  
ATOM    528  C   GLU A 209     -48.577   2.100  -2.661  1.00 95.35           C  
ATOM    529  O   GLU A 209     -49.658   2.371  -2.134  1.00 95.38           O  
ATOM    530  CB  GLU A 209     -46.796   1.738  -0.931  1.00 95.06           C  
ATOM    531  CG  GLU A 209     -46.120   0.750   0.018  1.00 95.18           C  
ATOM    532  CD  GLU A 209     -45.161   1.414   0.994  1.00 95.31           C  
ATOM    533  OE1 GLU A 209     -45.421   2.563   1.416  1.00 95.37           O  
ATOM    534  OE2 GLU A 209     -44.144   0.778   1.346  1.00 95.37           O  
ATOM    535  N   TYR A 210     -48.161   2.663  -3.795  1.00 95.73           N  
ATOM    536  CA  TYR A 210     -48.964   3.664  -4.500  1.00 96.10           C  
ATOM    537  C   TYR A 210     -50.066   3.049  -5.372  1.00 96.36           C  
ATOM    538  O   TYR A 210     -50.690   3.745  -6.176  1.00 96.40           O  
ATOM    539  CB  TYR A 210     -48.074   4.612  -5.319  1.00 96.09           C  
ATOM    540  CG  TYR A 210     -47.239   3.943  -6.392  1.00 96.18           C  
ATOM    541  CD1 TYR A 210     -47.771   3.678  -7.656  1.00 96.21           C  
ATOM    542  CD2 TYR A 210     -45.910   3.593  -6.150  1.00 96.28           C  
ATOM    543  CE1 TYR A 210     -47.007   3.068  -8.644  1.00 96.27           C  
ATOM    544  CE2 TYR A 210     -45.135   2.986  -7.133  1.00 96.33           C  
ATOM    545  CZ  TYR A 210     -45.690   2.726  -8.376  1.00 96.33           C  
ATOM    546  OH  TYR A 210     -44.930   2.125  -9.353  1.00 96.36           O  
ATOM    547  N   LEU A 211     -50.296   1.748  -5.208  1.00 96.70           N  
ATOM    548  CA  LEU A 211     -51.383   1.057  -5.901  1.00 97.04           C  
ATOM    549  C   LEU A 211     -52.308   0.321  -4.926  1.00 97.29           C  
ATOM    550  O   LEU A 211     -53.429  -0.052  -5.283  1.00 97.32           O  
ATOM    551  CB  LEU A 211     -50.837   0.105  -6.973  1.00 97.02           C  
ATOM    552  CG  LEU A 211     -50.105   0.707  -8.179  1.00 97.03           C  
ATOM    553  CD1 LEU A 211     -49.585  -0.393  -9.089  1.00 97.06           C  
ATOM    554  CD2 LEU A 211     -50.995   1.666  -8.962  1.00 97.01           C  
ATOM    555  N   TRP A 212     -51.833   0.126  -3.696  1.00 97.62           N  
ATOM    556  CA  TRP A 212     -52.642  -0.459  -2.625  1.00 97.94           C  
ATOM    557  C   TRP A 212     -53.703   0.510  -2.098  1.00 98.13           C  
ATOM    558  O   TRP A 212     -54.656   0.090  -1.438  1.00 98.16           O  
ATOM    559  CB  TRP A 212     -51.757  -0.945  -1.470  1.00 97.96           C  
ATOM    560  CG  TRP A 212     -51.244  -2.347  -1.641  1.00 98.11           C  
ATOM    561  CD1 TRP A 212     -49.975  -2.720  -1.984  1.00 98.23           C  
ATOM    562  CD2 TRP A 212     -51.988  -3.564  -1.475  1.00 98.26           C  
ATOM    563  NE1 TRP A 212     -49.882  -4.091  -2.045  1.00 98.32           N  
ATOM    564  CE2 TRP A 212     -51.102  -4.635  -1.737  1.00 98.32           C  
ATOM    565  CE3 TRP A 212     -53.317  -3.853  -1.131  1.00 98.28           C  
ATOM    566  CZ2 TRP A 212     -51.501  -5.976  -1.667  1.00 98.32           C  
ATOM    567  CZ3 TRP A 212     -53.714  -5.189  -1.060  1.00 98.33           C  
ATOM    568  CH2 TRP A 212     -52.806  -6.232  -1.328  1.00 98.33           C  
ATOM    569  N   LYS A 213     -53.534   1.800  -2.390  1.00 98.36           N  
ATOM    570  CA  LYS A 213     -54.471   2.828  -1.932  1.00 98.59           C  
ATOM    571  C   LYS A 213     -55.795   2.787  -2.708  1.00 98.75           C  
ATOM    572  O   LYS A 213     -56.849   3.130  -2.164  1.00 98.76           O  
ATOM    573  CB  LYS A 213     -53.826   4.228  -1.970  1.00 98.59           C  
ATOM    574  CG  LYS A 213     -54.129   5.094  -3.201  1.00 98.65           C  
ATOM    575  CD  LYS A 213     -53.314   4.692  -4.423  1.00 98.75           C  
ATOM    576  CE  LYS A 213     -53.758   5.473  -5.653  1.00 98.78           C  
ATOM    577  NZ  LYS A 213     -53.106   4.988  -6.900  1.00 98.79           N  
ATOM    578  N   LYS A 214     -55.728   2.361  -3.970  1.00 98.94           N  
ATOM    579  CA  LYS A 214     -56.916   2.208  -4.804  1.00 99.12           C  
ATOM    580  C   LYS A 214     -57.687   0.960  -4.384  1.00 99.27           C  
ATOM    581  O   LYS A 214     -58.919   0.944  -4.414  1.00 99.30           O  
ATOM    582  CB  LYS A 214     -56.541   2.138  -6.288  1.00 99.10           C  
ATOM    583  CG  LYS A 214     -57.710   2.400  -7.230  1.00 99.09           C  
ATOM    584  CD  LYS A 214     -57.342   2.154  -8.684  1.00 99.09           C  
ATOM    585  CE  LYS A 214     -58.547   2.377  -9.589  1.00 99.04           C  
ATOM    586  NZ  LYS A 214     -58.262   2.036 -11.008  1.00 98.96           N  
ATOM    587  N   ILE A 215     -56.951  -0.079  -3.991  1.00 99.44           N  
ATOM    588  CA  ILE A 215     -57.555  -1.301  -3.465  1.00 99.61           C  
ATOM    589  C   ILE A 215     -57.492  -1.287  -1.935  1.00 99.74           C  
ATOM    590  O   ILE A 215     -56.868  -2.153  -1.312  1.00 99.75           O  
ATOM    591  CB  ILE A 215     -56.893  -2.589  -4.031  1.00 99.61           C  
ATOM    592  CG1 ILE A 215     -56.463  -2.394  -5.490  1.00 99.65           C  
ATOM    593  CG2 ILE A 215     -57.849  -3.774  -3.902  1.00 99.59           C  
ATOM    594  CD1 ILE A 215     -55.511  -3.462  -6.010  1.00 99.66           C  
ATOM    595  N   ALA A 216     -58.139  -0.286  -1.341  1.00 99.89           N  
ATOM    596  CA  ALA A 216     -58.220  -0.156   0.113  1.00100.05           C  
ATOM    597  C   ALA A 216     -59.476  -0.850   0.649  1.00100.17           C  
ATOM    598  O   ALA A 216     -60.058  -0.426   1.652  1.00100.18           O  
ATOM    599  CB  ALA A 216     -58.193   1.317   0.515  1.00100.04           C  
ATOM    600  N   ASN A 217     -59.873  -1.926  -0.028  1.00100.34           N  
ATOM    601  CA  ASN A 217     -61.101  -2.657   0.285  1.00100.51           C  
ATOM    602  C   ASN A 217     -61.009  -4.159   0.000  1.00100.62           C  
ATOM    603  O   ASN A 217     -61.943  -4.910   0.302  1.00100.62           O  
ATOM    604  CB  ASN A 217     -62.292  -2.046  -0.471  1.00100.52           C  
ATOM    605  CG  ASN A 217     -62.080  -2.002  -1.984  1.00100.58           C  
ATOM    606  OD1 ASN A 217     -60.968  -2.191  -2.483  1.00100.63           O  
ATOM    607  ND2 ASN A 217     -63.156  -1.744  -2.719  1.00100.65           N  
ATOM    608  N   ASN A 218     -59.880  -4.581  -0.575  1.00100.77           N  
ATOM    609  CA  ASN A 218     -59.645  -5.972  -0.995  1.00100.91           C  
ATOM    610  C   ASN A 218     -60.656  -6.423  -2.059  1.00101.02           C  
ATOM    611  O   ASN A 218     -61.167  -7.546  -2.025  1.00101.02           O  
ATOM    612  CB  ASN A 218     -59.625  -6.918   0.218  1.00100.89           C  
ATOM    613  CG  ASN A 218     -58.780  -8.158  -0.014  1.00100.89           C  
ATOM    614  OD1 ASN A 218     -59.167  -9.063  -0.754  1.00100.87           O  
ATOM    615  ND2 ASN A 218     -57.625  -8.213   0.638  1.00100.91           N  
ATOM    616  N   CYS A 219     -60.933  -5.524  -3.003  1.00101.17           N  
ATOM    617  CA  CYS A 219     -61.910  -5.763  -4.063  1.00101.31           C  
ATOM    618  C   CYS A 219     -61.414  -5.241  -5.406  1.00101.42           C  
ATOM    619  O   CYS A 219     -60.808  -4.169  -5.483  1.00101.41           O  
ATOM    620  CB  CYS A 219     -63.247  -5.096  -3.723  1.00101.29           C  
ATOM    621  SG  CYS A 219     -64.046  -5.691  -2.216  1.00101.31           S  
ATOM    622  N   ILE A 220     -61.674  -6.010  -6.459  1.00101.57           N  
ATOM    623  CA  ILE A 220     -61.353  -5.608  -7.827  1.00101.71           C  
ATOM    624  C   ILE A 220     -62.586  -5.799  -8.707  1.00101.83           C  
ATOM    625  O   ILE A 220     -63.235  -6.848  -8.664  1.00101.84           O  
ATOM    626  CB  ILE A 220     -60.142  -6.391  -8.401  1.00101.71           C  
ATOM    627  CG1 ILE A 220     -58.914  -6.213  -7.502  1.00101.72           C  
ATOM    628  CG2 ILE A 220     -59.821  -5.930  -9.823  1.00101.69           C  
ATOM    629  CD1 ILE A 220     -57.765  -7.142  -7.823  1.00101.71           C  
ATOM    630  N   PHE A 221     -62.898  -4.775  -9.498  1.00101.98           N  
ATOM    631  CA  PHE A 221     -64.101  -4.764 -10.329  1.00102.13           C  
ATOM    632  C   PHE A 221     -63.781  -5.050 -11.799  1.00102.21           C  
ATOM    633  O   PHE A 221     -63.308  -4.178 -12.534  1.00102.21           O  
ATOM    634  CB  PHE A 221     -64.856  -3.439 -10.158  1.00102.12           C  
ATOM    635  CG  PHE A 221     -65.082  -3.053  -8.717  1.00102.17           C  
ATOM    636  CD1 PHE A 221     -64.242  -2.134  -8.088  1.00102.20           C  
ATOM    637  CD2 PHE A 221     -66.123  -3.620  -7.983  1.00102.18           C  
ATOM    638  CE1 PHE A 221     -64.441  -1.779  -6.753  1.00102.21           C  
ATOM    639  CE2 PHE A 221     -66.330  -3.273  -6.648  1.00102.18           C  
ATOM    640  CZ  PHE A 221     -65.487  -2.350  -6.032  1.00102.21           C  
ATOM    641  N   ILE A 222     -64.039  -6.290 -12.207  1.00102.31           N  
ATOM    642  CA  ILE A 222     -63.765  -6.751 -13.563  1.00102.43           C  
ATOM    643  C   ILE A 222     -65.058  -6.771 -14.373  1.00102.53           C  
ATOM    644  O   ILE A 222     -66.070  -7.312 -13.924  1.00102.55           O  
ATOM    645  CB  ILE A 222     -63.144  -8.179 -13.564  1.00102.43           C  
ATOM    646  CG1 ILE A 222     -61.992  -8.298 -12.549  1.00102.43           C  
ATOM    647  CG2 ILE A 222     -62.716  -8.596 -14.978  1.00102.43           C  
ATOM    648  CD1 ILE A 222     -60.685  -7.624 -12.954  1.00102.49           C  
ATOM    649  N   VAL A 223     -65.017  -6.178 -15.562  1.00102.64           N  
ATOM    650  CA  VAL A 223     -66.174  -6.149 -16.454  1.00102.75           C  
ATOM    651  C   VAL A 223     -65.987  -7.158 -17.589  1.00102.84           C  
ATOM    652  O   VAL A 223     -65.322  -6.872 -18.587  1.00102.84           O  
ATOM    653  CB  VAL A 223     -66.427  -4.729 -17.021  1.00102.74           C  
ATOM    654  CG1 VAL A 223     -67.750  -4.676 -17.777  1.00102.75           C  
ATOM    655  CG2 VAL A 223     -66.410  -3.690 -15.904  1.00102.72           C  
ATOM    656  N   ILE A 224     -66.577  -8.338 -17.420  1.00102.95           N  
ATOM    657  CA  ILE A 224     -66.454  -9.418 -18.399  1.00103.09           C  
ATOM    658  C   ILE A 224     -67.476  -9.247 -19.527  1.00103.18           C  
ATOM    659  O   ILE A 224     -68.654  -9.579 -19.372  1.00103.19           O  
ATOM    660  CB  ILE A 224     -66.570 -10.832 -17.742  1.00103.09           C  
ATOM    661  CG1 ILE A 224     -65.520 -11.022 -16.639  1.00103.11           C  
ATOM    662  CG2 ILE A 224     -66.417 -11.939 -18.784  1.00103.07           C  
ATOM    663  CD1 ILE A 224     -65.991 -10.647 -15.241  1.00103.11           C  
ATOM    664  N   HIS A 225     -67.009  -8.717 -20.655  1.00103.30           N  
ATOM    665  CA  HIS A 225     -67.841  -8.517 -21.839  1.00103.42           C  
ATOM    666  C   HIS A 225     -68.138  -9.827 -22.554  1.00103.52           C  
ATOM    667  O   HIS A 225     -67.344 -10.768 -22.505  1.00103.50           O  
ATOM    668  CB  HIS A 225     -67.161  -7.554 -22.809  1.00103.42           C  
ATOM    669  CG  HIS A 225     -67.257  -6.119 -22.402  1.00103.47           C  
ATOM    670  ND1 HIS A 225     -66.440  -5.561 -21.443  1.00103.48           N  
ATOM    671  CD2 HIS A 225     -68.073  -5.126 -22.828  1.00103.50           C  
ATOM    672  CE1 HIS A 225     -66.750  -4.285 -21.295  1.00103.50           C  
ATOM    673  NE2 HIS A 225     -67.737  -3.996 -22.124  1.00103.54           N  
ATOM    674  N   ARG A 226     -69.289  -9.872 -23.222  1.00103.66           N  
ATOM    675  CA  ARG A 226     -69.715 -11.042 -23.984  1.00103.80           C  
ATOM    676  C   ARG A 226     -70.772 -10.636 -25.014  1.00103.91           C  
ATOM    677  O   ARG A 226     -71.905 -11.131 -24.988  1.00103.92           O  
ATOM    678  CB  ARG A 226     -70.262 -12.126 -23.044  1.00103.79           C  
ATOM    679  CG  ARG A 226     -69.822 -13.543 -23.390  1.00103.76           C  
ATOM    680  CD  ARG A 226     -70.314 -13.977 -24.759  1.00103.69           C  
ATOM    681  NE  ARG A 226     -69.652 -15.194 -25.215  1.00103.69           N  
ATOM    682  CZ  ARG A 226     -69.816 -15.733 -26.419  1.00103.70           C  
ATOM    683  NH1 ARG A 226     -70.623 -15.165 -27.307  1.00103.71           N  
ATOM    684  NH2 ARG A 226     -69.168 -16.845 -26.738  1.00103.70           N  
ATOM    685  N   SER A 227     -70.384  -9.730 -25.914  1.00104.05           N  
ATOM    686  CA  SER A 227     -71.271  -9.158 -26.938  1.00104.19           C  
ATOM    687  C   SER A 227     -72.208  -8.097 -26.351  1.00104.28           C  
ATOM    688  O   SER A 227     -71.839  -6.924 -26.258  1.00104.29           O  
ATOM    689  CB  SER A 227     -72.054 -10.243 -27.698  1.00104.18           C  
ATOM    690  OG  SER A 227     -71.177 -11.134 -28.366  1.00104.19           O  
ATOM    691  N   THR A 228     -73.408  -8.513 -25.954  1.00104.40           N  
ATOM    692  CA  THR A 228     -74.402  -7.603 -25.385  1.00104.53           C  
ATOM    693  C   THR A 228     -74.556  -7.852 -23.880  1.00104.62           C  
ATOM    694  O   THR A 228     -75.383  -7.223 -23.212  1.00104.62           O  
ATOM    695  CB  THR A 228     -75.769  -7.736 -26.107  1.00104.53           C  
ATOM    696  OG1 THR A 228     -75.557  -7.964 -27.506  1.00104.54           O  
ATOM    697  CG2 THR A 228     -76.610  -6.473 -25.930  1.00104.53           C  
ATOM    698  N   THR A 229     -73.740  -8.762 -23.354  1.00104.73           N  
ATOM    699  CA  THR A 229     -73.790  -9.125 -21.942  1.00104.85           C  
ATOM    700  C   THR A 229     -72.475  -8.780 -21.247  1.00104.95           C  
ATOM    701  O   THR A 229     -71.398  -9.121 -21.738  1.00104.96           O  
ATOM    702  CB  THR A 229     -74.095 -10.629 -21.759  1.00104.84           C  
ATOM    703  OG1 THR A 229     -75.107 -11.034 -22.690  1.00104.83           O  
ATOM    704  CG2 THR A 229     -74.570 -10.919 -20.340  1.00104.82           C  
ATOM    705  N   SER A 230     -72.577  -8.094 -20.110  1.00105.08           N  
ATOM    706  CA  SER A 230     -71.414  -7.762 -19.286  1.00105.20           C  
ATOM    707  C   SER A 230     -71.812  -7.534 -17.829  1.00105.29           C  
ATOM    708  O   SER A 230     -72.616  -6.651 -17.524  1.00105.29           O  
ATOM    709  CB  SER A 230     -70.676  -6.537 -19.840  1.00105.19           C  
ATOM    710  OG  SER A 230     -71.530  -5.409 -19.900  1.00105.18           O  
ATOM    711  N   GLN A 231     -71.247  -8.348 -16.939  1.00105.40           N  
ATOM    712  CA  GLN A 231     -71.484  -8.230 -15.503  1.00105.54           C  
ATOM    713  C   GLN A 231     -70.217  -7.721 -14.815  1.00105.64           C  
ATOM    714  O   GLN A 231     -69.152  -7.667 -15.435  1.00105.64           O  
ATOM    715  CB  GLN A 231     -71.920  -9.585 -14.925  1.00105.54           C  
ATOM    716  CG  GLN A 231     -72.600  -9.526 -13.551  1.00105.56           C  
ATOM    717  CD  GLN A 231     -73.944  -8.807 -13.569  1.00105.56           C  
ATOM    718  OE1 GLN A 231     -74.732  -8.953 -14.505  1.00105.54           O  
ATOM    719  NE2 GLN A 231     -74.211  -8.030 -12.524  1.00105.52           N  
ATOM    720  N   THR A 232     -70.334  -7.343 -13.544  1.00105.78           N  
ATOM    721  CA  THR A 232     -69.188  -6.876 -12.766  1.00105.93           C  
ATOM    722  C   THR A 232     -68.925  -7.797 -11.571  1.00106.04           C  
ATOM    723  O   THR A 232     -69.549  -7.662 -10.515  1.00106.05           O  
ATOM    724  CB  THR A 232     -69.370  -5.410 -12.302  1.00105.92           C  
ATOM    725  OG1 THR A 232     -69.847  -4.615 -13.395  1.00105.93           O  
ATOM    726  CG2 THR A 232     -68.050  -4.833 -11.799  1.00105.91           C  
ATOM    727  N   ILE A 233     -67.999  -8.735 -11.757  1.00106.18           N  
ATOM    728  CA  ILE A 233     -67.652  -9.709 -10.723  1.00106.33           C  
ATOM    729  C   ILE A 233     -66.541  -9.173  -9.819  1.00106.44           C  
ATOM    730  O   ILE A 233     -65.456  -8.818 -10.289  1.00106.44           O  
ATOM    731  CB  ILE A 233     -67.273 -11.096 -11.331  1.00106.32           C  
ATOM    732  CG1 ILE A 233     -68.521 -11.837 -11.826  1.00106.34           C  
ATOM    733  CG2 ILE A 233     -66.561 -11.977 -10.309  1.00106.33           C  
ATOM    734  CD1 ILE A 233     -69.036 -11.393 -13.186  1.00106.33           C  
ATOM    735  N   LYS A 234     -66.837  -9.112  -8.522  1.00106.60           N  
ATOM    736  CA  LYS A 234     -65.902  -8.619  -7.516  1.00106.75           C  
ATOM    737  C   LYS A 234     -64.827  -9.669  -7.233  1.00106.85           C  
ATOM    738  O   LYS A 234     -65.134 -10.803  -6.855  1.00106.87           O  
ATOM    739  CB  LYS A 234     -66.658  -8.251  -6.237  1.00106.75           C  
ATOM    740  CG  LYS A 234     -65.943  -7.257  -5.334  1.00106.81           C  
ATOM    741  CD  LYS A 234     -66.886  -6.692  -4.272  1.00106.89           C  
ATOM    742  CE  LYS A 234     -67.151  -7.688  -3.146  1.00106.93           C  
ATOM    743  NZ  LYS A 234     -68.123  -7.159  -2.148  1.00106.94           N  
ATOM    744  N   VAL A 235     -63.569  -9.278  -7.426  1.00106.99           N  
ATOM    745  CA  VAL A 235     -62.430 -10.194  -7.323  1.00107.11           C  
ATOM    746  C   VAL A 235     -61.460  -9.757  -6.220  1.00107.20           C  
ATOM    747  O   VAL A 235     -61.201  -8.564  -6.048  1.00107.19           O  
ATOM    748  CB  VAL A 235     -61.681 -10.316  -8.686  1.00107.11           C  
ATOM    749  CG1 VAL A 235     -60.455 -11.212  -8.567  1.00107.11           C  
ATOM    750  CG2 VAL A 235     -62.612 -10.847  -9.772  1.00107.13           C  
ATOM    751  N   SER A 236     -60.940 -10.729  -5.473  1.00107.31           N  
ATOM    752  CA  SER A 236     -59.930 -10.468  -4.449  1.00107.41           C  
ATOM    753  C   SER A 236     -58.531 -10.421  -5.070  1.00107.50           C  
ATOM    754  O   SER A 236     -58.214 -11.244  -5.932  1.00107.49           O  
ATOM    755  CB  SER A 236     -59.991 -11.527  -3.343  1.00107.41           C  
ATOM    756  OG  SER A 236     -61.202 -11.437  -2.613  1.00107.41           O  
ATOM    757  N   PRO A 237     -57.694  -9.453  -4.637  1.00107.60           N  
ATOM    758  CA  PRO A 237     -56.318  -9.250  -5.118  1.00107.67           C  
ATOM    759  C   PRO A 237     -55.364 -10.428  -4.891  1.00107.76           C  
ATOM    760  O   PRO A 237     -54.152 -10.227  -4.802  1.00107.77           O  
ATOM    761  CB  PRO A 237     -55.846  -8.030  -4.318  1.00107.67           C  
ATOM    762  CG  PRO A 237     -57.081  -7.306  -3.979  1.00107.64           C  
ATOM    763  CD  PRO A 237     -58.109  -8.364  -3.732  1.00107.61           C  
ATOM    764  N   ASP A 238     -55.908 -11.639  -4.807  1.00107.87           N  
ATOM    765  CA  ASP A 238     -55.103 -12.848  -4.683  1.00107.98           C  
ATOM    766  C   ASP A 238     -55.823 -14.038  -5.322  1.00108.08           C  
ATOM    767  O   ASP A 238     -55.831 -15.145  -4.777  1.00108.09           O  
ATOM    768  CB  ASP A 238     -54.774 -13.122  -3.209  1.00107.96           C  
ATOM    769  CG  ASP A 238     -53.523 -13.970  -3.034  1.00107.97           C  
ATOM    770  OD1 ASP A 238     -53.456 -14.729  -2.043  1.00107.98           O  
ATOM    771  OD2 ASP A 238     -52.607 -13.880  -3.881  1.00107.97           O  
ATOM    772  N   ASP A 239     -56.422 -13.798  -6.488  1.00108.21           N  
ATOM    773  CA  ASP A 239     -57.203 -14.817  -7.195  1.00108.35           C  
ATOM    774  C   ASP A 239     -56.495 -15.357  -8.443  1.00108.43           C  
ATOM    775  O   ASP A 239     -55.545 -14.751  -8.939  1.00108.46           O  
ATOM    776  CB  ASP A 239     -58.584 -14.265  -7.570  1.00108.34           C  
ATOM    777  CG  ASP A 239     -59.504 -14.096  -6.368  1.00108.36           C  
ATOM    778  OD1 ASP A 239     -59.012 -14.060  -5.219  1.00108.39           O  
ATOM    779  OD2 ASP A 239     -60.731 -13.989  -6.579  1.00108.35           O  
ATOM    780  N   THR A 240     -56.974 -16.495  -8.941  1.00108.54           N  
ATOM    781  CA  THR A 240     -56.390 -17.164 -10.105  1.00108.63           C  
ATOM    782  C   THR A 240     -57.349 -17.089 -11.302  1.00108.72           C  
ATOM    783  O   THR A 240     -58.560 -17.240 -11.127  1.00108.73           O  
ATOM    784  CB  THR A 240     -56.057 -18.644  -9.773  1.00108.62           C  
ATOM    785  OG1 THR A 240     -55.382 -18.712  -8.510  1.00108.57           O  
ATOM    786  CG2 THR A 240     -55.174 -19.280 -10.846  1.00108.61           C  
ATOM    787  N   PRO A 241     -56.815 -16.829 -12.517  1.00108.82           N  
ATOM    788  CA  PRO A 241     -57.593 -16.808 -13.761  1.00108.91           C  
ATOM    789  C   PRO A 241     -58.585 -17.964 -13.904  1.00109.00           C  
ATOM    790  O   PRO A 241     -59.714 -17.751 -14.348  1.00108.99           O  
ATOM    791  CB  PRO A 241     -56.513 -16.899 -14.838  1.00108.90           C  
ATOM    792  CG  PRO A 241     -55.355 -16.187 -14.247  1.00108.87           C  
ATOM    793  CD  PRO A 241     -55.437 -16.354 -12.746  1.00108.83           C  
ATOM    794  N   GLY A 242     -58.164 -19.171 -13.532  1.00109.11           N  
ATOM    795  CA  GLY A 242     -59.039 -20.343 -13.562  1.00109.25           C  
ATOM    796  C   GLY A 242     -60.081 -20.324 -12.458  1.00109.35           C  
ATOM    797  O   GLY A 242     -61.207 -20.791 -12.650  1.00109.36           O  
ATOM    798  N   ALA A 243     -59.701 -19.776 -11.304  1.00109.45           N  
ATOM    799  CA  ALA A 243     -60.570 -19.714 -10.128  1.00109.54           C  
ATOM    800  C   ALA A 243     -61.656 -18.646 -10.245  1.00109.59           C  
ATOM    801  O   ALA A 243     -62.754 -18.816  -9.709  1.00109.60           O  
ATOM    802  CB  ALA A 243     -59.744 -19.498  -8.865  1.00109.54           C  
ATOM    803  N   ILE A 244     -61.347 -17.549 -10.935  1.00109.67           N  
ATOM    804  CA  ILE A 244     -62.326 -16.477 -11.148  1.00109.75           C  
ATOM    805  C   ILE A 244     -63.354 -16.837 -12.223  1.00109.80           C  
ATOM    806  O   ILE A 244     -64.454 -16.279 -12.247  1.00109.81           O  
ATOM    807  CB  ILE A 244     -61.670 -15.099 -11.454  1.00109.76           C  
ATOM    808  CG1 ILE A 244     -60.736 -15.182 -12.667  1.00109.78           C  
ATOM    809  CG2 ILE A 244     -60.951 -14.570 -10.219  1.00109.76           C  
ATOM    810  CD1 ILE A 244     -60.387 -13.838 -13.282  1.00109.81           C  
ATOM    811  N   LEU A 245     -62.991 -17.769 -13.103  1.00109.86           N  
ATOM    812  CA  LEU A 245     -63.935 -18.330 -14.067  1.00109.92           C  
ATOM    813  C   LEU A 245     -65.015 -19.134 -13.345  1.00109.96           C  
ATOM    814  O   LEU A 245     -66.192 -19.066 -13.703  1.00109.98           O  
ATOM    815  CB  LEU A 245     -63.213 -19.209 -15.094  1.00109.92           C  
ATOM    816  CG  LEU A 245     -62.310 -18.529 -16.128  1.00109.94           C  
ATOM    817  CD1 LEU A 245     -61.444 -19.562 -16.835  1.00109.98           C  
ATOM    818  CD2 LEU A 245     -63.109 -17.708 -17.138  1.00109.92           C  
ATOM    819  N   GLN A 246     -64.602 -19.876 -12.318  1.00109.99           N  
ATOM    820  CA  GLN A 246     -65.513 -20.659 -11.480  1.00110.02           C  
ATOM    821  C   GLN A 246     -66.542 -19.776 -10.773  1.00110.03           C  
ATOM    822  O   GLN A 246     -67.693 -20.177 -10.598  1.00110.04           O  
ATOM    823  CB  GLN A 246     -64.731 -21.473 -10.447  1.00110.02           C  
ATOM    824  CG  GLN A 246     -63.809 -22.531 -11.041  1.00110.04           C  
ATOM    825  CD  GLN A 246     -62.873 -23.146 -10.013  1.00110.06           C  
ATOM    826  OE1 GLN A 246     -62.728 -22.640  -8.897  1.00110.02           O  
ATOM    827  NE2 GLN A 246     -62.227 -24.244 -10.389  1.00110.08           N  
ATOM    828  N   SER A 247     -66.120 -18.577 -10.375  1.00110.05           N  
ATOM    829  CA  SER A 247     -67.019 -17.605  -9.755  1.00110.08           C  
ATOM    830  C   SER A 247     -67.735 -16.752 -10.810  1.00110.10           C  
ATOM    831  O   SER A 247     -68.108 -15.603 -10.551  1.00110.10           O  
ATOM    832  CB  SER A 247     -66.261 -16.728  -8.754  1.00110.06           C  
ATOM    833  OG  SER A 247     -65.201 -16.032  -9.383  1.00110.04           O  
ATOM    834  N   PHE A 248     -67.922 -17.330 -11.995  1.00110.13           N  
ATOM    835  CA  PHE A 248     -68.650 -16.686 -13.085  1.00110.16           C  
ATOM    836  C   PHE A 248     -69.624 -17.658 -13.755  1.00110.20           C  
ATOM    837  O   PHE A 248     -70.807 -17.344 -13.912  1.00110.19           O  
ATOM    838  CB  PHE A 248     -67.680 -16.092 -14.114  1.00110.14           C  
ATOM    839  CG  PHE A 248     -68.354 -15.557 -15.349  1.00110.12           C  
ATOM    840  CD1 PHE A 248     -69.007 -14.327 -15.326  1.00110.11           C  
ATOM    841  CD2 PHE A 248     -68.333 -16.281 -16.537  1.00110.09           C  
ATOM    842  CE1 PHE A 248     -69.633 -13.828 -16.467  1.00110.08           C  
ATOM    843  CE2 PHE A 248     -68.957 -15.791 -17.684  1.00110.07           C  
ATOM    844  CZ  PHE A 248     -69.607 -14.562 -17.648  1.00110.05           C  
ATOM    845  N   PHE A 249     -69.120 -18.828 -14.146  1.00110.25           N  
ATOM    846  CA  PHE A 249     -69.936 -19.866 -14.787  1.00110.31           C  
ATOM    847  C   PHE A 249     -70.997 -20.434 -13.843  1.00110.32           C  
ATOM    848  O   PHE A 249     -72.126 -20.704 -14.256  1.00110.32           O  
ATOM    849  CB  PHE A 249     -69.055 -21.000 -15.328  1.00110.32           C  
ATOM    850  CG  PHE A 249     -68.190 -20.601 -16.496  1.00110.39           C  
ATOM    851  CD1 PHE A 249     -66.821 -20.410 -16.330  1.00110.42           C  
ATOM    852  CD2 PHE A 249     -68.740 -20.426 -17.763  1.00110.44           C  
ATOM    853  CE1 PHE A 249     -66.012 -20.045 -17.404  1.00110.43           C  
ATOM    854  CE2 PHE A 249     -67.940 -20.058 -18.845  1.00110.44           C  
ATOM    855  CZ  PHE A 249     -66.573 -19.870 -18.664  1.00110.45           C  
ATOM    856  N   THR A 250     -70.620 -20.618 -12.579  1.00110.33           N  
ATOM    857  CA  THR A 250     -71.540 -21.086 -11.547  1.00110.34           C  
ATOM    858  C   THR A 250     -72.393 -19.923 -11.034  1.00110.34           C  
ATOM    859  O   THR A 250     -73.554 -20.111 -10.666  1.00110.34           O  
ATOM    860  CB  THR A 250     -70.780 -21.748 -10.371  1.00110.34           C  
ATOM    861  OG1 THR A 250     -69.771 -22.627 -10.884  1.00110.35           O  
ATOM    862  CG2 THR A 250     -71.730 -22.547  -9.483  1.00110.33           C  
ATOM    863  N   LYS A 251     -71.810 -18.725 -11.028  1.00110.35           N  
ATOM    864  CA  LYS A 251     -72.480 -17.521 -10.534  1.00110.36           C  
ATOM    865  C   LYS A 251     -73.586 -17.039 -11.477  1.00110.37           C  
ATOM    866  O   LYS A 251     -74.588 -16.475 -11.029  1.00110.37           O  
ATOM    867  CB  LYS A 251     -71.455 -16.406 -10.293  1.00110.37           C  
ATOM    868  CG  LYS A 251     -71.787 -15.466  -9.136  1.00110.34           C  
ATOM    869  CD  LYS A 251     -72.553 -14.233  -9.594  1.00110.30           C  
ATOM    870  CE  LYS A 251     -72.796 -13.273  -8.440  1.00110.25           C  
ATOM    871  NZ  LYS A 251     -73.528 -12.055  -8.882  1.00110.24           N  
ATOM    872  N   MET A 252     -73.399 -17.262 -12.777  1.00110.38           N  
ATOM    873  CA  MET A 252     -74.396 -16.893 -13.783  1.00110.38           C  
ATOM    874  C   MET A 252     -75.218 -18.091 -14.260  1.00110.38           C  
ATOM    875  O   MET A 252     -76.405 -18.198 -13.938  1.00110.38           O  
ATOM    876  CB  MET A 252     -73.734 -16.181 -14.970  1.00110.37           C  
ATOM    877  CG  MET A 252     -73.684 -14.656 -14.872  1.00110.39           C  
ATOM    878  SD  MET A 252     -73.150 -13.991 -13.279  1.00110.35           S  
ATOM    879  CE  MET A 252     -74.716 -13.477 -12.571  1.00110.33           C  
ATOM    880  N   ALA A 253     -74.574 -18.984 -15.015  1.00110.37           N  
ATOM    881  CA  ALA A 253     -75.215 -20.168 -15.606  1.00110.37           C  
ATOM    882  C   ALA A 253     -76.481 -19.830 -16.393  1.00110.37           C  
ATOM    883  O   ALA A 253     -76.761 -20.435 -17.427  1.00110.37           O  
ATOM    884  CB  ALA A 253     -75.504 -21.227 -14.538  1.00110.37           C  
ATOM    885  N   GLU A 267     -67.801 -26.355 -21.206  1.00 98.97           N  
ATOM    886  CA  GLU A 267     -68.328 -25.009 -20.987  1.00 98.97           C  
ATOM    887  C   GLU A 267     -67.295 -24.060 -20.368  1.00 98.95           C  
ATOM    888  O   GLU A 267     -67.473 -22.840 -20.397  1.00 98.95           O  
ATOM    889  CB  GLU A 267     -69.601 -25.051 -20.130  1.00 98.99           C  
ATOM    890  CG  GLU A 267     -70.821 -25.635 -20.846  1.00 99.08           C  
ATOM    891  CD  GLU A 267     -72.115 -25.484 -20.056  1.00 99.21           C  
ATOM    892  OE1 GLU A 267     -72.077 -25.529 -18.806  1.00 99.28           O  
ATOM    893  OE2 GLU A 267     -73.179 -25.327 -20.693  1.00 99.21           O  
ATOM    894  N   GLN A 268     -66.225 -24.625 -19.810  1.00 98.90           N  
ATOM    895  CA  GLN A 268     -65.117 -23.834 -19.265  1.00 98.84           C  
ATOM    896  C   GLN A 268     -63.883 -23.895 -20.172  1.00 98.76           C  
ATOM    897  O   GLN A 268     -62.743 -23.817 -19.702  1.00 98.76           O  
ATOM    898  CB  GLN A 268     -64.770 -24.284 -17.841  1.00 98.85           C  
ATOM    899  CG  GLN A 268     -65.795 -23.877 -16.784  1.00 98.92           C  
ATOM    900  CD  GLN A 268     -65.264 -23.977 -15.358  1.00 99.05           C  
ATOM    901  OE1 GLN A 268     -65.700 -23.239 -14.472  1.00 99.06           O  
ATOM    902  NE2 GLN A 268     -64.321 -24.888 -15.131  1.00 99.12           N  
ATOM    903  N   ASP A 269     -64.129 -24.031 -21.475  1.00 98.65           N  
ATOM    904  CA  ASP A 269     -63.068 -24.064 -22.486  1.00 98.52           C  
ATOM    905  C   ASP A 269     -62.818 -22.686 -23.114  1.00 98.38           C  
ATOM    906  O   ASP A 269     -62.208 -22.582 -24.181  1.00 98.35           O  
ATOM    907  CB  ASP A 269     -63.380 -25.112 -23.570  1.00 98.56           C  
ATOM    908  CG  ASP A 269     -64.749 -24.909 -24.230  1.00 98.69           C  
ATOM    909  OD1 ASP A 269     -65.067 -25.677 -25.163  1.00 98.79           O  
ATOM    910  OD2 ASP A 269     -65.509 -24.000 -23.826  1.00 98.82           O  
ATOM    911  N   PHE A 270     -63.297 -21.641 -22.440  1.00 98.20           N  
ATOM    912  CA  PHE A 270     -63.128 -20.261 -22.891  1.00 98.02           C  
ATOM    913  C   PHE A 270     -61.901 -19.609 -22.254  1.00 97.85           C  
ATOM    914  O   PHE A 270     -61.347 -20.125 -21.279  1.00 97.85           O  
ATOM    915  CB  PHE A 270     -64.382 -19.437 -22.575  1.00 98.05           C  
ATOM    916  CG  PHE A 270     -65.597 -19.841 -23.366  1.00 98.09           C  
ATOM    917  CD1 PHE A 270     -66.518 -20.742 -22.840  1.00 98.11           C  
ATOM    918  CD2 PHE A 270     -65.828 -19.311 -24.635  1.00 98.14           C  
ATOM    919  CE1 PHE A 270     -67.648 -21.116 -23.567  1.00 98.14           C  
ATOM    920  CE2 PHE A 270     -66.955 -19.679 -25.371  1.00 98.13           C  
ATOM    921  CZ  PHE A 270     -67.866 -20.582 -24.835  1.00 98.16           C  
ATOM    922  N   VAL A 271     -61.491 -18.468 -22.805  1.00 97.62           N  
ATOM    923  CA  VAL A 271     -60.301 -17.760 -22.339  1.00 97.40           C  
ATOM    924  C   VAL A 271     -60.616 -16.322 -21.899  1.00 97.22           C  
ATOM    925  O   VAL A 271     -61.604 -15.729 -22.342  1.00 97.20           O  
ATOM    926  CB  VAL A 271     -59.177 -17.786 -23.418  1.00 97.42           C  
ATOM    927  CG1 VAL A 271     -59.430 -16.755 -24.519  1.00 97.42           C  
ATOM    928  CG2 VAL A 271     -57.808 -17.584 -22.787  1.00 97.43           C  
ATOM    929  N   LEU A 272     -59.777 -15.784 -21.015  1.00 96.99           N  
ATOM    930  CA  LEU A 272     -59.874 -14.393 -20.577  1.00 96.76           C  
ATOM    931  C   LEU A 272     -58.952 -13.515 -21.419  1.00 96.59           C  
ATOM    932  O   LEU A 272     -57.729 -13.678 -21.396  1.00 96.57           O  
ATOM    933  CB  LEU A 272     -59.519 -14.268 -19.092  1.00 96.77           C  
ATOM    934  CG  LEU A 272     -60.426 -14.967 -18.075  1.00 96.74           C  
ATOM    935  CD1 LEU A 272     -59.667 -15.247 -16.788  1.00 96.74           C  
ATOM    936  CD2 LEU A 272     -61.682 -14.151 -17.797  1.00 96.73           C  
ATOM    937  N   ARG A 273     -59.550 -12.585 -22.159  1.00 96.36           N  
ATOM    938  CA  ARG A 273     -58.817 -11.753 -23.107  1.00 96.12           C  
ATOM    939  C   ARG A 273     -59.194 -10.281 -22.957  1.00 95.96           C  
ATOM    940  O   ARG A 273     -60.356  -9.954 -22.724  1.00 95.96           O  
ATOM    941  CB  ARG A 273     -59.100 -12.227 -24.534  1.00 96.13           C  
ATOM    942  CG  ARG A 273     -58.356 -11.466 -25.612  1.00 96.15           C  
ATOM    943  CD  ARG A 273     -59.179 -11.387 -26.876  1.00 96.20           C  
ATOM    944  NE  ARG A 273     -59.180 -10.025 -27.399  1.00 96.22           N  
ATOM    945  CZ  ARG A 273     -60.068  -9.545 -28.262  1.00 96.26           C  
ATOM    946  NH1 ARG A 273     -61.050 -10.309 -28.724  1.00 96.25           N  
ATOM    947  NH2 ARG A 273     -59.973  -8.287 -28.660  1.00 96.32           N  
ATOM    948  N   VAL A 274     -58.204  -9.403 -23.098  1.00 95.73           N  
ATOM    949  CA  VAL A 274     -58.422  -7.959 -23.004  1.00 95.52           C  
ATOM    950  C   VAL A 274     -59.199  -7.442 -24.218  1.00 95.35           C  
ATOM    951  O   VAL A 274     -58.915  -7.818 -25.359  1.00 95.35           O  
ATOM    952  CB  VAL A 274     -57.087  -7.186 -22.851  1.00 95.53           C  
ATOM    953  CG1 VAL A 274     -57.333  -5.686 -22.748  1.00 95.51           C  
ATOM    954  CG2 VAL A 274     -56.325  -7.674 -21.629  1.00 95.50           C  
ATOM    955  N   CYS A 275     -60.182  -6.584 -23.952  1.00 95.12           N  
ATOM    956  CA  CYS A 275     -61.030  -6.005 -24.990  1.00 94.89           C  
ATOM    957  C   CYS A 275     -60.275  -4.992 -25.849  1.00 94.70           C  
ATOM    958  O   CYS A 275     -59.787  -3.977 -25.346  1.00 94.69           O  
ATOM    959  CB  CYS A 275     -62.258  -5.353 -24.359  1.00 94.91           C  
ATOM    960  SG  CYS A 275     -63.339  -6.505 -23.505  1.00 94.93           S  
ATOM    961  N   GLY A 276     -60.183  -5.282 -27.144  1.00 94.47           N  
ATOM    962  CA  GLY A 276     -59.488  -4.415 -28.096  1.00 94.16           C  
ATOM    963  C   GLY A 276     -57.993  -4.665 -28.179  1.00 93.93           C  
ATOM    964  O   GLY A 276     -57.273  -3.930 -28.859  1.00 93.91           O  
ATOM    965  N   ARG A 277     -57.528  -5.702 -27.488  1.00 93.70           N  
ATOM    966  CA  ARG A 277     -56.111  -6.048 -27.459  1.00 93.48           C  
ATOM    967  C   ARG A 277     -55.886  -7.548 -27.626  1.00 93.33           C  
ATOM    968  O   ARG A 277     -56.827  -8.340 -27.550  1.00 93.32           O  
ATOM    969  CB  ARG A 277     -55.464  -5.558 -26.161  1.00 93.47           C  
ATOM    970  CG  ARG A 277     -55.143  -4.073 -26.143  1.00 93.49           C  
ATOM    971  CD  ARG A 277     -54.308  -3.704 -24.927  1.00 93.50           C  
ATOM    972  NE  ARG A 277     -53.852  -2.314 -24.971  1.00 93.50           N  
ATOM    973  CZ  ARG A 277     -52.726  -1.903 -25.552  1.00 93.52           C  
ATOM    974  NH1 ARG A 277     -51.921  -2.769 -26.156  1.00 93.53           N  
ATOM    975  NH2 ARG A 277     -52.404  -0.617 -25.535  1.00 93.55           N  
ATOM    976  N   ASP A 278     -54.629  -7.922 -27.854  1.00 93.14           N  
ATOM    977  CA  ASP A 278     -54.234  -9.319 -28.012  1.00 92.95           C  
ATOM    978  C   ASP A 278     -53.600  -9.860 -26.725  1.00 92.81           C  
ATOM    979  O   ASP A 278     -52.849 -10.838 -26.750  1.00 92.80           O  
ATOM    980  CB  ASP A 278     -53.268  -9.454 -29.195  1.00 92.97           C  
ATOM    981  CG  ASP A 278     -53.107 -10.891 -29.667  1.00 93.02           C  
ATOM    982  OD1 ASP A 278     -51.958 -11.381 -29.690  1.00 93.03           O  
ATOM    983  OD2 ASP A 278     -54.124 -11.530 -30.014  1.00 93.16           O  
ATOM    984  N   GLU A 279     -53.912  -9.218 -25.602  1.00 92.62           N  
ATOM    985  CA  GLU A 279     -53.386  -9.627 -24.303  1.00 92.43           C  
ATOM    986  C   GLU A 279     -54.351 -10.585 -23.607  1.00 92.29           C  
ATOM    987  O   GLU A 279     -55.567 -10.381 -23.634  1.00 92.28           O  
ATOM    988  CB  GLU A 279     -53.114  -8.400 -23.428  1.00 92.43           C  
ATOM    989  CG  GLU A 279     -52.106  -8.634 -22.307  1.00 92.40           C  
ATOM    990  CD  GLU A 279     -50.691  -8.852 -22.817  1.00 92.38           C  
ATOM    991  OE1 GLU A 279     -50.054  -9.837 -22.387  1.00 92.40           O  
ATOM    992  OE2 GLU A 279     -50.219  -8.045 -23.648  1.00 92.35           O  
ATOM    993  N   TYR A 280     -53.800 -11.626 -22.987  1.00 92.12           N  
ATOM    994  CA  TYR A 280     -54.602 -12.654 -22.325  1.00 91.95           C  
ATOM    995  C   TYR A 280     -54.292 -12.753 -20.836  1.00 91.86           C  
ATOM    996  O   TYR A 280     -53.177 -12.451 -20.405  1.00 91.85           O  
ATOM    997  CB  TYR A 280     -54.379 -14.016 -22.985  1.00 91.95           C  
ATOM    998  CG  TYR A 280     -54.820 -14.088 -24.429  1.00 91.91           C  
ATOM    999  CD1 TYR A 280     -53.939 -13.774 -25.463  1.00 91.87           C  
ATOM   1000  CD2 TYR A 280     -56.114 -14.480 -24.763  1.00 91.88           C  
ATOM   1001  CE1 TYR A 280     -54.337 -13.841 -26.792  1.00 91.84           C  
ATOM   1002  CE2 TYR A 280     -56.522 -14.552 -26.090  1.00 91.86           C  
ATOM   1003  CZ  TYR A 280     -55.628 -14.230 -27.097  1.00 91.85           C  
ATOM   1004  OH  TYR A 280     -56.023 -14.298 -28.412  1.00 91.89           O  
ATOM   1005  N   LEU A 281     -55.286 -13.183 -20.062  1.00 91.75           N  
ATOM   1006  CA  LEU A 281     -55.131 -13.367 -18.621  1.00 91.64           C  
ATOM   1007  C   LEU A 281     -55.306 -14.833 -18.230  1.00 91.55           C  
ATOM   1008  O   LEU A 281     -56.407 -15.270 -17.882  1.00 91.54           O  
ATOM   1009  CB  LEU A 281     -56.111 -12.479 -17.842  1.00 91.64           C  
ATOM   1010  CG  LEU A 281     -55.878 -10.966 -17.832  1.00 91.65           C  
ATOM   1011  CD1 LEU A 281     -56.627 -10.296 -18.971  1.00 91.75           C  
ATOM   1012  CD2 LEU A 281     -56.314 -10.376 -16.503  1.00 91.64           C  
ATOM   1013  N   VAL A 282     -54.210 -15.586 -18.297  1.00 91.42           N  
ATOM   1014  CA  VAL A 282     -54.208 -17.015 -17.972  1.00 91.30           C  
ATOM   1015  C   VAL A 282     -52.958 -17.425 -17.192  1.00 91.22           C  
ATOM   1016  O   VAL A 282     -52.071 -16.603 -16.948  1.00 91.23           O  
ATOM   1017  CB  VAL A 282     -54.328 -17.903 -19.241  1.00 91.30           C  
ATOM   1018  CG1 VAL A 282     -55.775 -17.995 -19.704  1.00 91.31           C  
ATOM   1019  CG2 VAL A 282     -53.417 -17.396 -20.358  1.00 91.29           C  
ATOM   1020  N   GLY A 283     -52.899 -18.699 -16.807  1.00 91.13           N  
ATOM   1021  CA  GLY A 283     -51.752 -19.248 -16.087  1.00 91.00           C  
ATOM   1022  C   GLY A 283     -51.941 -19.268 -14.582  1.00 90.91           C  
ATOM   1023  O   GLY A 283     -52.786 -18.548 -14.042  1.00 90.90           O  
ATOM   1024  N   GLU A 284     -51.144 -20.093 -13.906  1.00 90.81           N  
ATOM   1025  CA  GLU A 284     -51.206 -20.223 -12.450  1.00 90.71           C  
ATOM   1026  C   GLU A 284     -50.478 -19.064 -11.769  1.00 90.64           C  
ATOM   1027  O   GLU A 284     -49.423 -19.245 -11.156  1.00 90.62           O  
ATOM   1028  CB  GLU A 284     -50.633 -21.575 -11.998  1.00 90.72           C  
ATOM   1029  CG  GLU A 284     -51.372 -22.803 -12.540  1.00 90.72           C  
ATOM   1030  CD  GLU A 284     -52.819 -22.895 -12.070  1.00 90.71           C  
ATOM   1031  OE1 GLU A 284     -53.088 -22.629 -10.879  1.00 90.73           O  
ATOM   1032  OE2 GLU A 284     -53.688 -23.242 -12.895  1.00 90.65           O  
ATOM   1033  N   THR A 285     -51.053 -17.869 -11.895  1.00 90.55           N  
ATOM   1034  CA  THR A 285     -50.467 -16.651 -11.345  1.00 90.47           C  
ATOM   1035  C   THR A 285     -51.567 -15.729 -10.820  1.00 90.41           C  
ATOM   1036  O   THR A 285     -52.565 -15.513 -11.510  1.00 90.38           O  
ATOM   1037  CB  THR A 285     -49.640 -15.884 -12.405  1.00 90.47           C  
ATOM   1038  OG1 THR A 285     -48.976 -16.810 -13.273  1.00 90.46           O  
ATOM   1039  CG2 THR A 285     -48.604 -14.996 -11.737  1.00 90.48           C  
ATOM   1040  N   PRO A 286     -51.390 -15.188  -9.596  1.00 90.36           N  
ATOM   1041  CA  PRO A 286     -52.335 -14.229  -9.017  1.00 90.33           C  
ATOM   1042  C   PRO A 286     -52.632 -13.054  -9.949  1.00 90.32           C  
ATOM   1043  O   PRO A 286     -51.729 -12.565 -10.631  1.00 90.33           O  
ATOM   1044  CB  PRO A 286     -51.605 -13.740  -7.765  1.00 90.32           C  
ATOM   1045  CG  PRO A 286     -50.772 -14.892  -7.358  1.00 90.34           C  
ATOM   1046  CD  PRO A 286     -50.332 -15.554  -8.634  1.00 90.35           C  
ATOM   1047  N   ILE A 287     -53.890 -12.615  -9.971  1.00 90.30           N  
ATOM   1048  CA  ILE A 287     -54.332 -11.520 -10.848  1.00 90.27           C  
ATOM   1049  C   ILE A 287     -53.681 -10.173 -10.522  1.00 90.26           C  
ATOM   1050  O   ILE A 287     -53.749  -9.231 -11.316  1.00 90.25           O  
ATOM   1051  CB  ILE A 287     -55.884 -11.384 -10.892  1.00 90.27           C  
ATOM   1052  CG1 ILE A 287     -56.511 -11.627  -9.515  1.00 90.28           C  
ATOM   1053  CG2 ILE A 287     -56.473 -12.355 -11.899  1.00 90.26           C  
ATOM   1054  CD1 ILE A 287     -56.455 -10.442  -8.585  1.00 90.34           C  
ATOM   1055  N   LYS A 288     -53.050 -10.097  -9.353  1.00 90.24           N  
ATOM   1056  CA  LYS A 288     -52.280  -8.924  -8.945  1.00 90.24           C  
ATOM   1057  C   LYS A 288     -50.957  -8.820  -9.716  1.00 90.24           C  
ATOM   1058  O   LYS A 288     -50.335  -7.757  -9.754  1.00 90.25           O  
ATOM   1059  CB  LYS A 288     -52.018  -8.960  -7.431  1.00 90.24           C  
ATOM   1060  CG  LYS A 288     -51.106 -10.105  -6.967  1.00 90.27           C  
ATOM   1061  CD  LYS A 288     -50.994 -10.211  -5.447  1.00 90.32           C  
ATOM   1062  CE  LYS A 288     -49.978  -9.233  -4.862  1.00 90.38           C  
ATOM   1063  NZ  LYS A 288     -50.558  -7.880  -4.625  1.00 90.47           N  
ATOM   1064  N   ASN A 289     -50.545  -9.928 -10.330  1.00 90.23           N  
ATOM   1065  CA  ASN A 289     -49.252 -10.022 -11.006  1.00 90.21           C  
ATOM   1066  C   ASN A 289     -49.286  -9.694 -12.502  1.00 90.22           C  
ATOM   1067  O   ASN A 289     -48.238  -9.619 -13.148  1.00 90.23           O  
ATOM   1068  CB  ASN A 289     -48.640 -11.409 -10.783  1.00 90.20           C  
ATOM   1069  CG  ASN A 289     -48.190 -11.634  -9.346  1.00 90.17           C  
ATOM   1070  OD1 ASN A 289     -48.030 -10.690  -8.568  1.00 90.09           O  
ATOM   1071  ND2 ASN A 289     -47.976 -12.895  -8.992  1.00 90.13           N  
ATOM   1072  N   PHE A 290     -50.485  -9.505 -13.048  1.00 90.22           N  
ATOM   1073  CA  PHE A 290     -50.636  -9.155 -14.459  1.00 90.22           C  
ATOM   1074  C   PHE A 290     -50.358  -7.672 -14.683  1.00 90.25           C  
ATOM   1075  O   PHE A 290     -50.932  -6.815 -14.008  1.00 90.25           O  
ATOM   1076  CB  PHE A 290     -52.028  -9.534 -14.969  1.00 90.20           C  
ATOM   1077  CG  PHE A 290     -52.253 -11.017 -15.071  1.00 90.14           C  
ATOM   1078  CD1 PHE A 290     -52.688 -11.746 -13.970  1.00 90.10           C  
ATOM   1079  CD2 PHE A 290     -52.030 -11.686 -16.269  1.00 90.08           C  
ATOM   1080  CE1 PHE A 290     -52.896 -13.120 -14.059  1.00 90.06           C  
ATOM   1081  CE2 PHE A 290     -52.235 -13.060 -16.368  1.00 90.02           C  
ATOM   1082  CZ  PHE A 290     -52.670 -13.778 -15.260  1.00 90.03           C  
ATOM   1083  N   GLN A 291     -49.471  -7.382 -15.633  1.00 90.29           N  
ATOM   1084  CA  GLN A 291     -49.024  -6.013 -15.903  1.00 90.34           C  
ATOM   1085  C   GLN A 291     -50.120  -5.107 -16.453  1.00 90.35           C  
ATOM   1086  O   GLN A 291     -50.093  -3.896 -16.232  1.00 90.36           O  
ATOM   1087  CB  GLN A 291     -47.817  -6.012 -16.845  1.00 90.34           C  
ATOM   1088  CG  GLN A 291     -46.469  -6.170 -16.139  1.00 90.44           C  
ATOM   1089  CD  GLN A 291     -45.994  -4.894 -15.447  1.00 90.58           C  
ATOM   1090  OE1 GLN A 291     -45.334  -4.948 -14.409  1.00 90.60           O  
ATOM   1091  NE2 GLN A 291     -46.326  -3.741 -16.024  1.00 90.63           N  
ATOM   1092  N   TRP A 292     -51.075  -5.697 -17.170  1.00 90.38           N  
ATOM   1093  CA  TRP A 292     -52.223  -4.955 -17.687  1.00 90.41           C  
ATOM   1094  C   TRP A 292     -53.169  -4.537 -16.560  1.00 90.47           C  
ATOM   1095  O   TRP A 292     -53.745  -3.447 -16.600  1.00 90.46           O  
ATOM   1096  CB  TRP A 292     -52.970  -5.772 -18.743  1.00 90.38           C  
ATOM   1097  CG  TRP A 292     -54.213  -5.100 -19.245  1.00 90.29           C  
ATOM   1098  CD1 TRP A 292     -55.501  -5.433 -18.942  1.00 90.22           C  
ATOM   1099  CD2 TRP A 292     -54.286  -3.970 -20.123  1.00 90.22           C  
ATOM   1100  NE1 TRP A 292     -56.373  -4.587 -19.584  1.00 90.22           N  
ATOM   1101  CE2 TRP A 292     -55.654  -3.678 -20.315  1.00 90.22           C  
ATOM   1102  CE3 TRP A 292     -53.328  -3.177 -20.770  1.00 90.18           C  
ATOM   1103  CZ2 TRP A 292     -56.091  -2.626 -21.127  1.00 90.21           C  
ATOM   1104  CZ3 TRP A 292     -53.762  -2.131 -21.580  1.00 90.16           C  
ATOM   1105  CH2 TRP A 292     -55.133  -1.866 -21.749  1.00 90.20           C  
ATOM   1106  N   VAL A 293     -53.321  -5.410 -15.565  1.00 90.53           N  
ATOM   1107  CA  VAL A 293     -54.135  -5.128 -14.379  1.00 90.60           C  
ATOM   1108  C   VAL A 293     -53.526  -3.975 -13.574  1.00 90.67           C  
ATOM   1109  O   VAL A 293     -54.239  -3.066 -13.140  1.00 90.67           O  
ATOM   1110  CB  VAL A 293     -54.304  -6.393 -13.490  1.00 90.59           C  
ATOM   1111  CG1 VAL A 293     -55.048  -6.068 -12.197  1.00 90.54           C  
ATOM   1112  CG2 VAL A 293     -55.030  -7.494 -14.255  1.00 90.59           C  
ATOM   1113  N   ARG A 294     -52.205  -4.016 -13.399  1.00 90.73           N  
ATOM   1114  CA  ARG A 294     -51.466  -2.964 -12.700  1.00 90.79           C  
ATOM   1115  C   ARG A 294     -51.446  -1.661 -13.498  1.00 90.85           C  
ATOM   1116  O   ARG A 294     -51.362  -0.576 -12.917  1.00 90.86           O  
ATOM   1117  CB  ARG A 294     -50.037  -3.417 -12.390  1.00 90.78           C  
ATOM   1118  CG  ARG A 294     -49.950  -4.575 -11.409  1.00 90.80           C  
ATOM   1119  CD  ARG A 294     -48.521  -4.821 -10.961  1.00 90.90           C  
ATOM   1120  NE  ARG A 294     -48.426  -5.979 -10.074  1.00 90.98           N  
ATOM   1121  CZ  ARG A 294     -47.338  -6.327  -9.393  1.00 91.06           C  
ATOM   1122  NH1 ARG A 294     -46.226  -5.607  -9.480  1.00 91.08           N  
ATOM   1123  NH2 ARG A 294     -47.364  -7.401  -8.615  1.00 91.11           N  
ATOM   1124  N   HIS A 295     -51.519  -1.780 -14.824  1.00 90.93           N  
ATOM   1125  CA  HIS A 295     -51.608  -0.626 -15.721  1.00 91.01           C  
ATOM   1126  C   HIS A 295     -52.916   0.141 -15.519  1.00 91.10           C  
ATOM   1127  O   HIS A 295     -52.929   1.375 -15.523  1.00 91.10           O  
ATOM   1128  CB  HIS A 295     -51.466  -1.073 -17.181  1.00 90.98           C  
ATOM   1129  CG  HIS A 295     -52.044  -0.111 -18.172  1.00 90.93           C  
ATOM   1130  ND1 HIS A 295     -51.382   1.027 -18.579  1.00 90.87           N  
ATOM   1131  CD2 HIS A 295     -53.223  -0.119 -18.836  1.00 90.88           C  
ATOM   1132  CE1 HIS A 295     -52.129   1.679 -19.451  1.00 90.87           C  
ATOM   1133  NE2 HIS A 295     -53.252   1.005 -19.625  1.00 90.87           N  
ATOM   1134  N   CYS A 296     -54.006  -0.604 -15.347  1.00 91.21           N  
ATOM   1135  CA  CYS A 296     -55.326  -0.027 -15.105  1.00 91.32           C  
ATOM   1136  C   CYS A 296     -55.407   0.633 -13.728  1.00 91.38           C  
ATOM   1137  O   CYS A 296     -56.050   1.672 -13.570  1.00 91.39           O  
ATOM   1138  CB  CYS A 296     -56.411  -1.098 -15.240  1.00 91.33           C  
ATOM   1139  SG  CYS A 296     -56.513  -1.869 -16.875  1.00 91.42           S  
ATOM   1140  N   LEU A 297     -54.744   0.026 -12.744  1.00 91.45           N  
ATOM   1141  CA  LEU A 297     -54.719   0.540 -11.373  1.00 91.52           C  
ATOM   1142  C   LEU A 297     -53.887   1.815 -11.247  1.00 91.57           C  
ATOM   1143  O   LEU A 297     -54.101   2.617 -10.336  1.00 91.55           O  
ATOM   1144  CB  LEU A 297     -54.190  -0.529 -10.411  1.00 91.53           C  
ATOM   1145  CG  LEU A 297     -55.041  -1.783 -10.175  1.00 91.51           C  
ATOM   1146  CD1 LEU A 297     -54.184  -2.929  -9.653  1.00 91.46           C  
ATOM   1147  CD2 LEU A 297     -56.209  -1.502  -9.232  1.00 91.54           C  
ATOM   1148  N   LYS A 298     -52.940   1.990 -12.165  1.00 91.65           N  
ATOM   1149  CA  LYS A 298     -52.067   3.159 -12.180  1.00 91.76           C  
ATOM   1150  C   LYS A 298     -52.786   4.396 -12.727  1.00 91.80           C  
ATOM   1151  O   LYS A 298     -52.807   5.445 -12.078  1.00 91.80           O  
ATOM   1152  CB  LYS A 298     -50.796   2.862 -12.990  1.00 91.78           C  
ATOM   1153  CG  LYS A 298     -49.733   3.959 -12.947  1.00 91.87           C  
ATOM   1154  CD  LYS A 298     -48.559   3.633 -13.862  1.00 91.90           C  
ATOM   1155  CE  LYS A 298     -47.628   4.827 -14.015  1.00 91.91           C  
ATOM   1156  NZ  LYS A 298     -46.473   4.525 -14.903  1.00 91.94           N  
ATOM   1157  N   ASN A 299     -53.374   4.261 -13.915  1.00 91.87           N  
ATOM   1158  CA  ASN A 299     -54.036   5.378 -14.591  1.00 91.96           C  
ATOM   1159  C   ASN A 299     -55.479   5.613 -14.140  1.00 92.01           C  
ATOM   1160  O   ASN A 299     -56.070   6.652 -14.444  1.00 92.01           O  
ATOM   1161  CB  ASN A 299     -53.979   5.198 -16.114  1.00 91.96           C  
ATOM   1162  CG  ASN A 299     -52.588   5.443 -16.692  1.00 91.99           C  
ATOM   1163  OD1 ASN A 299     -52.319   5.088 -17.839  1.00 91.98           O  
ATOM   1164  ND2 ASN A 299     -51.705   6.056 -15.907  1.00 92.02           N  
ATOM   1165  N   GLY A 300     -56.039   4.648 -13.413  1.00 92.09           N  
ATOM   1166  CA  GLY A 300     -57.414   4.739 -12.928  1.00 92.18           C  
ATOM   1167  C   GLY A 300     -58.415   4.273 -13.968  1.00 92.24           C  
ATOM   1168  O   GLY A 300     -59.253   5.051 -14.428  1.00 92.24           O  
ATOM   1169  N   GLU A 301     -58.317   2.998 -14.337  1.00 92.29           N  
ATOM   1170  CA  GLU A 301     -59.187   2.400 -15.349  1.00 92.36           C  
ATOM   1171  C   GLU A 301     -59.819   1.103 -14.850  1.00 92.38           C  
ATOM   1172  O   GLU A 301     -59.405   0.550 -13.829  1.00 92.37           O  
ATOM   1173  CB  GLU A 301     -58.408   2.138 -16.643  1.00 92.37           C  
ATOM   1174  CG  GLU A 301     -57.998   3.395 -17.405  1.00 92.48           C  
ATOM   1175  CD  GLU A 301     -57.201   3.089 -18.664  1.00 92.64           C  
ATOM   1176  OE1 GLU A 301     -56.145   3.724 -18.868  1.00 92.72           O  
ATOM   1177  OE2 GLU A 301     -57.628   2.214 -19.449  1.00 92.70           O  
ATOM   1178  N   GLU A 302     -60.826   0.628 -15.579  1.00 92.42           N  
ATOM   1179  CA  GLU A 302     -61.517  -0.615 -15.245  1.00 92.46           C  
ATOM   1180  C   GLU A 302     -61.070  -1.731 -16.186  1.00 92.47           C  
ATOM   1181  O   GLU A 302     -60.952  -1.521 -17.395  1.00 92.48           O  
ATOM   1182  CB  GLU A 302     -63.036  -0.425 -15.329  1.00 92.48           C  
ATOM   1183  CG  GLU A 302     -63.586   0.717 -14.469  1.00 92.58           C  
ATOM   1184  CD  GLU A 302     -64.981   1.167 -14.888  1.00 92.72           C  
ATOM   1185  OE1 GLU A 302     -65.268   1.196 -16.107  1.00 92.74           O  
ATOM   1186  OE2 GLU A 302     -65.786   1.510 -13.993  1.00 92.78           O  
ATOM   1187  N   ILE A 303     -60.821  -2.912 -15.625  1.00 92.48           N  
ATOM   1188  CA  ILE A 303     -60.330  -4.052 -16.403  1.00 92.48           C  
ATOM   1189  C   ILE A 303     -61.474  -4.729 -17.166  1.00 92.51           C  
ATOM   1190  O   ILE A 303     -62.144  -5.629 -16.650  1.00 92.48           O  
ATOM   1191  CB  ILE A 303     -59.556  -5.087 -15.524  1.00 92.48           C  
ATOM   1192  CG1 ILE A 303     -58.534  -4.398 -14.610  1.00 92.45           C  
ATOM   1193  CG2 ILE A 303     -58.854  -6.127 -16.391  1.00 92.43           C  
ATOM   1194  CD1 ILE A 303     -59.041  -4.117 -13.204  1.00 92.42           C  
ATOM   1195  N   HIS A 304     -61.691  -4.274 -18.398  1.00 92.56           N  
ATOM   1196  CA  HIS A 304     -62.722  -4.833 -19.264  1.00 92.63           C  
ATOM   1197  C   HIS A 304     -62.181  -6.040 -20.030  1.00 92.66           C  
ATOM   1198  O   HIS A 304     -61.370  -5.898 -20.949  1.00 92.67           O  
ATOM   1199  CB  HIS A 304     -63.257  -3.768 -20.226  1.00 92.64           C  
ATOM   1200  CG  HIS A 304     -63.958  -2.631 -19.546  1.00 92.73           C  
ATOM   1201  ND1 HIS A 304     -63.286  -1.554 -19.009  1.00 92.79           N  
ATOM   1202  CD2 HIS A 304     -65.274  -2.398 -19.326  1.00 92.78           C  
ATOM   1203  CE1 HIS A 304     -64.157  -0.708 -18.487  1.00 92.81           C  
ATOM   1204  NE2 HIS A 304     -65.370  -1.199 -18.663  1.00 92.83           N  
ATOM   1205  N   VAL A 305     -62.636  -7.225 -19.632  1.00 92.69           N  
ATOM   1206  CA  VAL A 305     -62.201  -8.491 -20.225  1.00 92.74           C  
ATOM   1207  C   VAL A 305     -63.314  -9.045 -21.118  1.00 92.77           C  
ATOM   1208  O   VAL A 305     -64.475  -8.673 -20.962  1.00 92.77           O  
ATOM   1209  CB  VAL A 305     -61.824  -9.514 -19.117  1.00 92.74           C  
ATOM   1210  CG1 VAL A 305     -61.312 -10.824 -19.708  1.00 92.73           C  
ATOM   1211  CG2 VAL A 305     -60.778  -8.922 -18.180  1.00 92.79           C  
ATOM   1212  N   VAL A 306     -62.955  -9.911 -22.064  1.00 92.83           N  
ATOM   1213  CA  VAL A 306     -63.938 -10.550 -22.943  1.00 92.89           C  
ATOM   1214  C   VAL A 306     -63.823 -12.082 -22.918  1.00 92.93           C  
ATOM   1215  O   VAL A 306     -62.724 -12.632 -22.829  1.00 92.92           O  
ATOM   1216  CB  VAL A 306     -63.873  -9.984 -24.398  1.00 92.89           C  
ATOM   1217  CG1 VAL A 306     -62.640 -10.487 -25.152  1.00 92.91           C  
ATOM   1218  CG2 VAL A 306     -65.157 -10.290 -25.169  1.00 92.90           C  
ATOM   1219  N   LEU A 307     -64.969 -12.754 -22.978  1.00 92.99           N  
ATOM   1220  CA  LEU A 307     -65.018 -14.210 -22.988  1.00 93.06           C  
ATOM   1221  C   LEU A 307     -65.058 -14.719 -24.425  1.00 93.12           C  
ATOM   1222  O   LEU A 307     -65.994 -14.422 -25.172  1.00 93.13           O  
ATOM   1223  CB  LEU A 307     -66.240 -14.710 -22.207  1.00 93.06           C  
ATOM   1224  CG  LEU A 307     -66.296 -16.191 -21.819  1.00 93.08           C  
ATOM   1225  CD1 LEU A 307     -65.501 -16.457 -20.545  1.00 93.09           C  
ATOM   1226  CD2 LEU A 307     -67.738 -16.634 -21.647  1.00 93.08           C  
ATOM   1227  N   ASP A 308     -64.031 -15.477 -24.805  1.00 93.20           N  
ATOM   1228  CA  ASP A 308     -63.913 -16.021 -26.161  1.00 93.27           C  
ATOM   1229  C   ASP A 308     -63.064 -17.296 -26.211  1.00 93.34           C  
ATOM   1230  O   ASP A 308     -62.517 -17.729 -25.194  1.00 93.34           O  
ATOM   1231  CB  ASP A 308     -63.360 -14.962 -27.129  1.00 93.26           C  
ATOM   1232  CG  ASP A 308     -61.984 -14.453 -26.728  1.00 93.23           C  
ATOM   1233  OD1 ASP A 308     -61.700 -14.358 -25.515  1.00 93.22           O  
ATOM   1234  OD2 ASP A 308     -61.188 -14.135 -27.636  1.00 93.19           O  
ATOM   1235  N   THR A 309     -62.970 -17.888 -27.400  1.00 93.45           N  
ATOM   1236  CA  THR A 309     -62.204 -19.115 -27.620  1.00 93.55           C  
ATOM   1237  C   THR A 309     -60.703 -18.817 -27.605  1.00 93.63           C  
ATOM   1238  O   THR A 309     -60.266 -17.834 -28.208  1.00 93.63           O  
ATOM   1239  CB  THR A 309     -62.597 -19.785 -28.961  1.00 93.54           C  
ATOM   1240  OG1 THR A 309     -64.025 -19.858 -29.059  1.00 93.57           O  
ATOM   1241  CG2 THR A 309     -62.018 -21.195 -29.075  1.00 93.52           C  
ATOM   1242  N   PRO A 310     -59.915 -19.654 -26.898  1.00 93.72           N  
ATOM   1243  CA  PRO A 310     -58.453 -19.551 -26.879  1.00 93.80           C  
ATOM   1244  C   PRO A 310     -57.843 -19.660 -28.279  1.00 93.89           C  
ATOM   1245  O   PRO A 310     -58.328 -20.454 -29.092  1.00 93.90           O  
ATOM   1246  CB  PRO A 310     -58.029 -20.755 -26.033  1.00 93.79           C  
ATOM   1247  CG  PRO A 310     -59.188 -21.033 -25.163  1.00 93.76           C  
ATOM   1248  CD  PRO A 310     -60.399 -20.693 -25.969  1.00 93.73           C  
ATOM   1249  N   PRO A 311     -56.788 -18.866 -28.561  1.00 93.97           N  
ATOM   1250  CA  PRO A 311     -56.125 -18.918 -29.866  1.00 94.01           C  
ATOM   1251  C   PRO A 311     -55.478 -20.277 -30.114  1.00 94.06           C  
ATOM   1252  O   PRO A 311     -54.901 -20.868 -29.197  1.00 94.07           O  
ATOM   1253  CB  PRO A 311     -55.057 -17.823 -29.769  1.00 93.99           C  
ATOM   1254  CG  PRO A 311     -54.835 -17.628 -28.316  1.00 93.98           C  
ATOM   1255  CD  PRO A 311     -56.158 -17.877 -27.667  1.00 93.97           C  
ATOM   1256  N   ASP A 312     -55.591 -20.758 -31.348  1.00 94.13           N  
ATOM   1257  CA  ASP A 312     -55.088 -22.072 -31.735  1.00 94.22           C  
ATOM   1258  C   ASP A 312     -53.560 -22.149 -31.627  1.00 94.26           C  
ATOM   1259  O   ASP A 312     -52.853 -21.385 -32.289  1.00 94.25           O  
ATOM   1260  CB  ASP A 312     -55.555 -22.412 -33.157  1.00 94.23           C  
ATOM   1261  CG  ASP A 312     -55.334 -23.872 -33.523  1.00 94.27           C  
ATOM   1262  OD1 ASP A 312     -55.511 -24.752 -32.653  1.00 94.30           O  
ATOM   1263  OD2 ASP A 312     -54.998 -24.139 -34.696  1.00 94.28           O  
ATOM   1264  N   PRO A 313     -53.049 -23.067 -30.780  1.00 94.31           N  
ATOM   1265  CA  PRO A 313     -51.606 -23.266 -30.604  1.00 94.37           C  
ATOM   1266  C   PRO A 313     -50.937 -23.896 -31.826  1.00 94.43           C  
ATOM   1267  O   PRO A 313     -49.707 -23.900 -31.923  1.00 94.42           O  
ATOM   1268  CB  PRO A 313     -51.529 -24.221 -29.411  1.00 94.36           C  
ATOM   1269  CG  PRO A 313     -52.822 -24.948 -29.428  1.00 94.34           C  
ATOM   1270  CD  PRO A 313     -53.832 -23.949 -29.895  1.00 94.32           C  
ATOM   1271  N   ALA A 314     -51.749 -24.421 -32.742  1.00 94.53           N  
ATOM   1272  CA  ALA A 314     -51.259 -25.021 -33.982  1.00 94.63           C  
ATOM   1273  C   ALA A 314     -50.958 -23.971 -35.054  1.00 94.69           C  
ATOM   1274  O   ALA A 314     -50.461 -24.298 -36.134  1.00 94.68           O  
ATOM   1275  CB  ALA A 314     -52.256 -26.053 -34.501  1.00 94.63           C  
ATOM   1276  N   LEU A 315     -51.265 -22.711 -34.753  1.00 94.79           N  
ATOM   1277  CA  LEU A 315     -50.939 -21.601 -35.644  1.00 94.89           C  
ATOM   1278  C   LEU A 315     -49.469 -21.214 -35.505  1.00 94.97           C  
ATOM   1279  O   LEU A 315     -48.884 -20.627 -36.417  1.00 94.97           O  
ATOM   1280  CB  LEU A 315     -51.837 -20.392 -35.362  1.00 94.89           C  
ATOM   1281  CG  LEU A 315     -53.349 -20.535 -35.582  1.00 94.88           C  
ATOM   1282  CD1 LEU A 315     -54.094 -19.399 -34.898  1.00 94.85           C  
ATOM   1283  CD2 LEU A 315     -53.712 -20.606 -37.065  1.00 94.86           C  
ATOM   1284  N   ASP A 316     -48.883 -21.560 -34.360  1.00 95.07           N  
ATOM   1285  CA  ASP A 316     -47.479 -21.275 -34.065  1.00 95.16           C  
ATOM   1286  C   ASP A 316     -46.548 -22.361 -34.612  1.00 95.27           C  
ATOM   1287  O   ASP A 316     -45.419 -22.518 -34.136  1.00 95.27           O  
ATOM   1288  CB  ASP A 316     -47.271 -21.135 -32.550  1.00 95.13           C  
ATOM   1289  CG  ASP A 316     -48.174 -20.084 -31.919  1.00 95.07           C  
ATOM   1290  OD1 ASP A 316     -48.971 -19.442 -32.634  1.00 95.01           O  
ATOM   1291  OD2 ASP A 316     -48.084 -19.905 -30.688  1.00 94.97           O  
ATOM   1292  N   GLU A 317     -47.026 -23.103 -35.610  1.00 95.42           N  
ATOM   1293  CA  GLU A 317     -46.282 -24.225 -36.179  1.00 95.56           C  
ATOM   1294  C   GLU A 317     -44.983 -23.799 -36.847  1.00 95.63           C  
ATOM   1295  O   GLU A 317     -44.988 -23.084 -37.852  1.00 95.64           O  
ATOM   1296  CB  GLU A 317     -47.144 -25.008 -37.171  1.00 95.58           C  
ATOM   1297  CG  GLU A 317     -47.866 -26.203 -36.569  1.00 95.67           C  
ATOM   1298  CD  GLU A 317     -48.548 -27.072 -37.616  1.00 95.78           C  
ATOM   1299  OE1 GLU A 317     -48.606 -26.670 -38.800  1.00 95.76           O  
ATOM   1300  OE2 GLU A 317     -49.025 -28.167 -37.252  1.00 95.86           O  
ATOM   1301  N   VAL A 318     -43.873 -24.242 -36.264  1.00 95.73           N  
ATOM   1302  CA  VAL A 318     -42.554 -24.053 -36.850  1.00 95.84           C  
ATOM   1303  C   VAL A 318     -42.378 -25.098 -37.948  1.00 95.91           C  
ATOM   1304  O   VAL A 318     -42.577 -26.293 -37.711  1.00 95.93           O  
ATOM   1305  CB  VAL A 318     -41.437 -24.177 -35.780  1.00 95.83           C  
ATOM   1306  CG1 VAL A 318     -40.057 -24.239 -36.422  1.00 95.82           C  
ATOM   1307  CG2 VAL A 318     -41.515 -23.018 -34.799  1.00 95.83           C  
ATOM   1308  N   ARG A 319     -42.026 -24.639 -39.147  1.00 96.00           N  
ATOM   1309  CA  ARG A 319     -41.874 -25.522 -40.303  1.00 96.08           C  
ATOM   1310  C   ARG A 319     -40.686 -26.469 -40.133  1.00 96.15           C  
ATOM   1311  O   ARG A 319     -39.658 -26.094 -39.563  1.00 96.14           O  
ATOM   1312  CB  ARG A 319     -41.730 -24.708 -41.589  1.00 96.07           C  
ATOM   1313  CG  ARG A 319     -42.225 -25.432 -42.832  1.00 96.07           C  
ATOM   1314  CD  ARG A 319     -41.889 -24.665 -44.097  1.00 96.09           C  
ATOM   1315  NE  ARG A 319     -40.460 -24.709 -44.402  1.00 96.10           N  
ATOM   1316  CZ  ARG A 319     -39.917 -24.291 -45.543  1.00 96.12           C  
ATOM   1317  NH1 ARG A 319     -40.679 -23.794 -46.508  1.00 96.18           N  
ATOM   1318  NH2 ARG A 319     -38.606 -24.375 -45.722  1.00 96.11           N  
ATOM   1319  N   LYS A 320     -40.847 -27.694 -40.633  1.00 96.23           N  
ATOM   1320  CA  LYS A 320     -39.853 -28.760 -40.486  1.00 96.32           C  
ATOM   1321  C   LYS A 320     -38.498 -28.395 -41.092  1.00 96.35           C  
ATOM   1322  O   LYS A 320     -38.428 -27.825 -42.184  1.00 96.35           O  
ATOM   1323  CB  LYS A 320     -40.373 -30.067 -41.097  1.00 96.34           C  
ATOM   1324  CG  LYS A 320     -41.615 -30.627 -40.410  1.00 96.45           C  
ATOM   1325  CD  LYS A 320     -42.142 -31.870 -41.114  1.00 96.63           C  
ATOM   1326  CE  LYS A 320     -43.411 -32.386 -40.444  1.00 96.69           C  
ATOM   1327  NZ  LYS A 320     -43.929 -33.625 -41.090  1.00 96.74           N  
ATOM   1328  N   GLU A 321     -37.431 -28.727 -40.370  1.00 96.39           N  
ATOM   1329  CA  GLU A 321     -36.069 -28.421 -40.799  1.00 96.44           C  
ATOM   1330  C   GLU A 321     -35.206 -29.680 -40.840  1.00 96.44           C  
ATOM   1331  O   GLU A 321     -35.180 -30.460 -39.888  1.00 96.45           O  
ATOM   1332  CB  GLU A 321     -35.445 -27.380 -39.870  1.00 96.45           C  
ATOM   1333  CG  GLU A 321     -34.183 -26.724 -40.414  1.00 96.52           C  
ATOM   1334  CD  GLU A 321     -33.504 -25.819 -39.401  1.00 96.61           C  
ATOM   1335  OE1 GLU A 321     -32.276 -25.628 -39.515  1.00 96.64           O  
ATOM   1336  OE2 GLU A 321     -34.191 -25.301 -38.491  1.00 96.63           O  
ATOM   1337  N   CYS A 357       4.062 -23.371 -30.550  1.00 98.48           N  
ATOM   1338  CA  CYS A 357       5.002 -22.402 -31.102  1.00 98.49           C  
ATOM   1339  C   CYS A 357       5.288 -21.289 -30.098  1.00 98.49           C  
ATOM   1340  O   CYS A 357       4.369 -20.743 -29.484  1.00 98.49           O  
ATOM   1341  CB  CYS A 357       4.466 -21.818 -32.413  1.00 98.49           C  
ATOM   1342  SG  CYS A 357       5.677 -20.875 -33.379  1.00 98.48           S  
ATOM   1343  N   ASP A 358       6.569 -20.966 -29.937  1.00 98.51           N  
ATOM   1344  CA  ASP A 358       7.006 -19.927 -29.004  1.00 98.54           C  
ATOM   1345  C   ASP A 358       7.496 -18.669 -29.717  1.00 98.56           C  
ATOM   1346  O   ASP A 358       7.859 -17.684 -29.069  1.00 98.57           O  
ATOM   1347  CB  ASP A 358       8.104 -20.466 -28.080  1.00 98.55           C  
ATOM   1348  CG  ASP A 358       7.577 -21.459 -27.061  1.00 98.58           C  
ATOM   1349  OD1 ASP A 358       6.861 -22.405 -27.454  1.00 98.63           O  
ATOM   1350  OD2 ASP A 358       7.890 -21.293 -25.863  1.00 98.59           O  
ATOM   1351  N   ARG A 359       7.500 -18.708 -31.048  1.00 98.57           N  
ATOM   1352  CA  ARG A 359       7.996 -17.600 -31.861  1.00 98.59           C  
ATOM   1353  C   ARG A 359       7.106 -16.367 -31.738  1.00 98.57           C  
ATOM   1354  O   ARG A 359       5.878 -16.473 -31.745  1.00 98.57           O  
ATOM   1355  CB  ARG A 359       8.138 -18.030 -33.330  1.00 98.60           C  
ATOM   1356  CG  ARG A 359       8.789 -16.998 -34.272  1.00 98.64           C  
ATOM   1357  CD  ARG A 359      10.163 -16.510 -33.791  1.00 98.68           C  
ATOM   1358  NE  ARG A 359      11.126 -17.598 -33.614  1.00 98.74           N  
ATOM   1359  CZ  ARG A 359      12.027 -17.972 -34.518  1.00 98.77           C  
ATOM   1360  NH1 ARG A 359      12.109 -17.351 -35.689  1.00 98.83           N  
ATOM   1361  NH2 ARG A 359      12.854 -18.974 -34.250  1.00 98.76           N  
ATOM   1362  N   LYS A 360       7.746 -15.207 -31.610  1.00 98.57           N  
ATOM   1363  CA  LYS A 360       7.060 -13.920 -31.516  1.00 98.58           C  
ATOM   1364  C   LYS A 360       6.172 -13.688 -32.737  1.00 98.58           C  
ATOM   1365  O   LYS A 360       6.604 -13.897 -33.874  1.00 98.60           O  
ATOM   1366  CB  LYS A 360       8.081 -12.785 -31.380  1.00 98.57           C  
ATOM   1367  CG  LYS A 360       8.878 -12.802 -30.075  1.00 98.57           C  
ATOM   1368  CD  LYS A 360      10.201 -12.048 -30.198  1.00 98.57           C  
ATOM   1369  CE  LYS A 360      10.009 -10.536 -30.184  1.00 98.63           C  
ATOM   1370  NZ  LYS A 360      11.301  -9.811 -30.340  1.00 98.68           N  
ATOM   1371  N   PHE A 361       4.933 -13.268 -32.488  1.00 98.57           N  
ATOM   1372  CA  PHE A 361       3.953 -13.024 -33.549  1.00 98.56           C  
ATOM   1373  C   PHE A 361       4.384 -11.898 -34.489  1.00 98.58           C  
ATOM   1374  O   PHE A 361       4.934 -10.886 -34.049  1.00 98.58           O  
ATOM   1375  CB  PHE A 361       2.573 -12.725 -32.948  1.00 98.54           C  
ATOM   1376  CG  PHE A 361       1.577 -12.191 -33.944  1.00 98.47           C  
ATOM   1377  CD1 PHE A 361       0.995 -13.032 -34.888  1.00 98.41           C  
ATOM   1378  CD2 PHE A 361       1.227 -10.845 -33.941  1.00 98.41           C  
ATOM   1379  CE1 PHE A 361       0.080 -12.539 -35.812  1.00 98.36           C  
ATOM   1380  CE2 PHE A 361       0.313 -10.342 -34.861  1.00 98.35           C  
ATOM   1381  CZ  PHE A 361      -0.262 -11.191 -35.798  1.00 98.34           C  
ATOM   1382  N   ARG A 362       4.128 -12.088 -35.783  1.00 98.60           N  
ATOM   1383  CA  ARG A 362       4.462 -11.091 -36.801  1.00 98.61           C  
ATOM   1384  C   ARG A 362       3.409 -11.000 -37.908  1.00 98.62           C  
ATOM   1385  O   ARG A 362       2.750 -11.989 -38.235  1.00 98.62           O  
ATOM   1386  CB  ARG A 362       5.853 -11.357 -37.395  1.00 98.60           C  
ATOM   1387  CG  ARG A 362       6.020 -12.706 -38.083  1.00 98.55           C  
ATOM   1388  CD  ARG A 362       7.393 -12.818 -38.720  1.00 98.44           C  
ATOM   1389  NE  ARG A 362       7.400 -13.759 -39.836  1.00 98.32           N  
ATOM   1390  CZ  ARG A 362       8.393 -13.878 -40.713  1.00 98.24           C  
ATOM   1391  NH1 ARG A 362       9.472 -13.113 -40.615  1.00 98.19           N  
ATOM   1392  NH2 ARG A 362       8.303 -14.763 -41.694  1.00 98.22           N  
ATOM   1393  N   VAL A 363       3.262  -9.804 -38.474  1.00 98.65           N  
ATOM   1394  CA  VAL A 363       2.312  -9.559 -39.559  1.00 98.68           C  
ATOM   1395  C   VAL A 363       2.957  -8.732 -40.676  1.00 98.72           C  
ATOM   1396  O   VAL A 363       3.561  -7.688 -40.419  1.00 98.73           O  
ATOM   1397  CB  VAL A 363       0.993  -8.900 -39.040  1.00 98.68           C  
ATOM   1398  CG1 VAL A 363       1.269  -7.593 -38.292  1.00 98.66           C  
ATOM   1399  CG2 VAL A 363       0.003  -8.677 -40.178  1.00 98.69           C  
ATOM   1400  N   LYS A 364       2.832  -9.213 -41.910  1.00 98.74           N  
ATOM   1401  CA  LYS A 364       3.408  -8.529 -43.063  1.00 98.78           C  
ATOM   1402  C   LYS A 364       2.403  -7.568 -43.692  1.00 98.77           C  
ATOM   1403  O   LYS A 364       1.489  -7.988 -44.405  1.00 98.75           O  
ATOM   1404  CB  LYS A 364       3.911  -9.539 -44.102  1.00 98.81           C  
ATOM   1405  CG  LYS A 364       4.940  -8.971 -45.078  1.00 98.91           C  
ATOM   1406  CD  LYS A 364       5.420 -10.024 -46.069  1.00 99.01           C  
ATOM   1407  CE  LYS A 364       6.679  -9.563 -46.789  1.00 99.06           C  
ATOM   1408  NZ  LYS A 364       7.162 -10.547 -47.797  1.00 99.05           N  
ATOM   1409  N   ILE A 365       2.575  -6.279 -43.412  1.00 98.79           N  
ATOM   1410  CA  ILE A 365       1.749  -5.238 -44.016  1.00 98.83           C  
ATOM   1411  C   ILE A 365       2.233  -5.024 -45.446  1.00 98.83           C  
ATOM   1412  O   ILE A 365       3.217  -4.322 -45.684  1.00 98.83           O  
ATOM   1413  CB  ILE A 365       1.804  -3.903 -43.215  1.00 98.84           C  
ATOM   1414  CG1 ILE A 365       1.677  -4.146 -41.699  1.00 98.85           C  
ATOM   1415  CG2 ILE A 365       0.758  -2.904 -43.732  1.00 98.86           C  
ATOM   1416  CD1 ILE A 365       0.376  -4.806 -41.234  1.00 98.85           C  
ATOM   1417  N   ARG A 366       1.537  -5.650 -46.391  1.00 98.85           N  
ATOM   1418  CA  ARG A 366       1.965  -5.671 -47.787  1.00 98.87           C  
ATOM   1419  C   ARG A 366       1.757  -4.323 -48.476  1.00 98.90           C  
ATOM   1420  O   ARG A 366       2.686  -3.786 -49.083  1.00 98.91           O  
ATOM   1421  CB  ARG A 366       1.264  -6.795 -48.558  1.00 98.85           C  
ATOM   1422  CG  ARG A 366       1.173  -8.110 -47.790  1.00 98.82           C  
ATOM   1423  CD  ARG A 366       0.940  -9.285 -48.714  1.00 98.68           C  
ATOM   1424  NE  ARG A 366       2.170  -9.680 -49.397  1.00 98.60           N  
ATOM   1425  CZ  ARG A 366       2.255 -10.652 -50.299  1.00 98.56           C  
ATOM   1426  NH1 ARG A 366       1.179 -11.347 -50.646  1.00 98.49           N  
ATOM   1427  NH2 ARG A 366       3.424 -10.930 -50.859  1.00 98.57           N  
ATOM   1428  N   GLY A 367       0.547  -3.778 -48.370  1.00 98.92           N  
ATOM   1429  CA  GLY A 367       0.235  -2.486 -48.972  1.00 98.98           C  
ATOM   1430  C   GLY A 367      -1.226  -2.091 -48.902  1.00 99.04           C  
ATOM   1431  O   GLY A 367      -2.088  -2.905 -48.559  1.00 99.04           O  
ATOM   1432  N   ILE A 368      -1.498  -0.832 -49.232  1.00 99.09           N  
ATOM   1433  CA  ILE A 368      -2.858  -0.295 -49.222  1.00 99.16           C  
ATOM   1434  C   ILE A 368      -3.264   0.229 -50.599  1.00 99.22           C  
ATOM   1435  O   ILE A 368      -2.406   0.586 -51.409  1.00 99.21           O  
ATOM   1436  CB  ILE A 368      -3.038   0.812 -48.149  1.00 99.15           C  
ATOM   1437  CG1 ILE A 368      -2.024   1.946 -48.349  1.00 99.12           C  
ATOM   1438  CG2 ILE A 368      -2.929   0.212 -46.749  1.00 99.15           C  
ATOM   1439  CD1 ILE A 368      -2.410   3.253 -47.680  1.00 99.07           C  
ATOM   1440  N   ASP A 369      -4.571   0.266 -50.855  1.00 99.33           N  
ATOM   1441  CA  ASP A 369      -5.099   0.706 -52.148  1.00 99.44           C  
ATOM   1442  C   ASP A 369      -6.411   1.485 -52.010  1.00 99.50           C  
ATOM   1443  O   ASP A 369      -7.335   1.045 -51.324  1.00 99.50           O  
ATOM   1444  CB  ASP A 369      -5.287  -0.496 -53.083  1.00 99.44           C  
ATOM   1445  CG  ASP A 369      -5.534  -0.089 -54.529  1.00 99.45           C  
ATOM   1446  OD1 ASP A 369      -4.959   0.926 -54.983  1.00 99.43           O  
ATOM   1447  OD2 ASP A 369      -6.298  -0.797 -55.217  1.00 99.45           O  
ATOM   1448  N   ILE A 370      -6.478   2.637 -52.675  1.00 99.59           N  
ATOM   1449  CA  ILE A 370      -7.661   3.499 -52.652  1.00 99.67           C  
ATOM   1450  C   ILE A 370      -7.830   4.205 -54.008  1.00 99.75           C  
ATOM   1451  O   ILE A 370      -6.861   4.736 -54.553  1.00 99.76           O  
ATOM   1452  CB  ILE A 370      -7.604   4.511 -51.450  1.00 99.68           C  
ATOM   1453  CG1 ILE A 370      -9.010   4.825 -50.896  1.00 99.69           C  
ATOM   1454  CG2 ILE A 370      -6.733   5.739 -51.763  1.00 99.67           C  
ATOM   1455  CD1 ILE A 370      -9.829   5.855 -51.663  1.00 99.69           C  
ATOM   1456  N   PRO A 371      -9.054   4.177 -54.575  1.00 99.83           N  
ATOM   1457  CA  PRO A 371      -9.322   4.832 -55.863  1.00 99.88           C  
ATOM   1458  C   PRO A 371      -9.229   6.367 -55.867  1.00 99.94           C  
ATOM   1459  O   PRO A 371      -8.501   6.926 -56.690  1.00 99.96           O  
ATOM   1460  CB  PRO A 371     -10.748   4.373 -56.196  1.00 99.89           C  
ATOM   1461  CG  PRO A 371     -10.892   3.082 -55.482  1.00 99.87           C  
ATOM   1462  CD  PRO A 371     -10.159   3.281 -54.189  1.00 99.84           C  
ATOM   1463  N   VAL A 372      -9.951   7.038 -54.970  1.00100.00           N  
ATOM   1464  CA  VAL A 372     -10.040   8.506 -54.984  1.00100.07           C  
ATOM   1465  C   VAL A 372      -9.541   9.126 -53.673  1.00100.11           C  
ATOM   1466  O   VAL A 372      -9.976   8.735 -52.588  1.00100.10           O  
ATOM   1467  CB  VAL A 372     -11.493   8.987 -55.301  1.00100.08           C  
ATOM   1468  CG1 VAL A 372     -11.616  10.511 -55.213  1.00100.09           C  
ATOM   1469  CG2 VAL A 372     -11.938   8.502 -56.678  1.00100.08           C  
ATOM   1470  N   LEU A 373      -8.637  10.098 -53.783  1.00100.18           N  
ATOM   1471  CA  LEU A 373      -8.052  10.748 -52.607  1.00100.24           C  
ATOM   1472  C   LEU A 373      -8.015  12.291 -52.605  1.00100.27           C  
ATOM   1473  O   LEU A 373      -7.993  12.884 -51.521  1.00100.29           O  
ATOM   1474  CB  LEU A 373      -6.647  10.183 -52.331  1.00100.27           C  
ATOM   1475  CG  LEU A 373      -5.382  10.899 -52.838  1.00100.30           C  
ATOM   1476  CD1 LEU A 373      -4.152  10.319 -52.166  1.00100.32           C  
ATOM   1477  CD2 LEU A 373      -5.229  10.856 -54.356  1.00100.33           C  
ATOM   1478  N   PRO A 374      -8.016  12.942 -53.799  1.00100.28           N  
ATOM   1479  CA  PRO A 374      -7.704  14.381 -53.914  1.00100.27           C  
ATOM   1480  C   PRO A 374      -8.287  15.280 -52.818  1.00100.24           C  
ATOM   1481  O   PRO A 374      -9.491  15.236 -52.544  1.00100.24           O  
ATOM   1482  CB  PRO A 374      -8.291  14.753 -55.279  1.00100.27           C  
ATOM   1483  CG  PRO A 374      -8.154  13.517 -56.070  1.00100.27           C  
ATOM   1484  CD  PRO A 374      -8.424  12.390 -55.107  1.00100.29           C  
ATOM   1485  N   ARG A 375      -7.417  16.083 -52.205  1.00100.20           N  
ATOM   1486  CA  ARG A 375      -7.791  16.993 -51.117  1.00100.14           C  
ATOM   1487  C   ARG A 375      -6.992  18.303 -51.175  1.00100.07           C  
ATOM   1488  O   ARG A 375      -6.586  18.735 -52.256  1.00100.08           O  
ATOM   1489  CB  ARG A 375      -7.656  16.304 -49.744  1.00100.15           C  
ATOM   1490  CG  ARG A 375      -6.488  15.316 -49.596  1.00100.19           C  
ATOM   1491  CD  ARG A 375      -5.190  15.981 -49.134  1.00100.23           C  
ATOM   1492  NE  ARG A 375      -4.468  16.635 -50.226  1.00100.29           N  
ATOM   1493  CZ  ARG A 375      -3.544  16.049 -50.985  1.00100.31           C  
ATOM   1494  NH1 ARG A 375      -3.211  14.779 -50.786  1.00100.34           N  
ATOM   1495  NH2 ARG A 375      -2.949  16.738 -51.950  1.00100.35           N  
ATOM   1496  N   ASN A 376      -6.774  18.926 -50.017  1.00 99.98           N  
ATOM   1497  CA  ASN A 376      -6.033  20.188 -49.930  1.00 99.88           C  
ATOM   1498  C   ASN A 376      -4.511  19.998 -50.005  1.00 99.78           C  
ATOM   1499  O   ASN A 376      -3.979  19.654 -51.063  1.00 99.78           O  
ATOM   1500  CB  ASN A 376      -6.429  20.965 -48.664  1.00 99.91           C  
ATOM   1501  CG  ASN A 376      -7.909  21.320 -48.626  1.00 99.98           C  
ATOM   1502  OD1 ASN A 376      -8.639  21.129 -49.601  1.00100.10           O  
ATOM   1503  ND2 ASN A 376      -8.358  21.842 -47.490  1.00100.06           N  
ATOM   1504  N   THR A 377      -3.822  20.225 -48.886  1.00 99.64           N  
ATOM   1505  CA  THR A 377      -2.365  20.071 -48.810  1.00 99.49           C  
ATOM   1506  C   THR A 377      -1.962  18.627 -48.500  1.00 99.36           C  
ATOM   1507  O   THR A 377      -2.683  17.910 -47.800  1.00 99.37           O  
ATOM   1508  CB  THR A 377      -1.738  21.018 -47.757  1.00 99.50           C  
ATOM   1509  OG1 THR A 377      -2.457  20.912 -46.520  1.00 99.51           O  
ATOM   1510  CG2 THR A 377      -1.772  22.464 -48.240  1.00 99.47           C  
ATOM   1511  N   ASP A 378      -0.808  18.214 -49.024  1.00 99.19           N  
ATOM   1512  CA  ASP A 378      -0.303  16.847 -48.842  1.00 99.01           C  
ATOM   1513  C   ASP A 378       0.229  16.587 -47.428  1.00 98.84           C  
ATOM   1514  O   ASP A 378       0.845  17.464 -46.813  1.00 98.84           O  
ATOM   1515  CB  ASP A 378       0.770  16.514 -49.893  1.00 99.03           C  
ATOM   1516  CG  ASP A 378       1.999  17.416 -49.800  1.00 99.05           C  
ATOM   1517  OD1 ASP A 378       3.123  16.908 -50.004  1.00 99.04           O  
ATOM   1518  OD2 ASP A 378       1.848  18.627 -49.530  1.00 99.08           O  
ATOM   1519  N   LEU A 379      -0.019  15.377 -46.925  1.00 98.60           N  
ATOM   1520  CA  LEU A 379       0.426  14.970 -45.590  1.00 98.34           C  
ATOM   1521  C   LEU A 379       0.790  13.484 -45.569  1.00 98.15           C  
ATOM   1522  O   LEU A 379       0.238  12.689 -46.337  1.00 98.13           O  
ATOM   1523  CB  LEU A 379      -0.653  15.289 -44.541  1.00 98.35           C  
ATOM   1524  CG  LEU A 379      -0.283  15.707 -43.103  1.00 98.34           C  
ATOM   1525  CD1 LEU A 379      -0.007  14.510 -42.193  1.00 98.34           C  
ATOM   1526  CD2 LEU A 379       0.881  16.694 -43.061  1.00 98.29           C  
ATOM   1527  N   THR A 380       1.724  13.125 -44.690  1.00 97.90           N  
ATOM   1528  CA  THR A 380       2.227  11.750 -44.578  1.00 97.65           C  
ATOM   1529  C   THR A 380       1.192  10.768 -44.007  1.00 97.44           C  
ATOM   1530  O   THR A 380       0.266  11.172 -43.299  1.00 97.42           O  
ATOM   1531  CB  THR A 380       3.556  11.686 -43.767  1.00 97.69           C  
ATOM   1532  OG1 THR A 380       4.054  10.342 -43.760  1.00 97.67           O  
ATOM   1533  CG2 THR A 380       3.362  12.172 -42.326  1.00 97.69           C  
ATOM   1534  N   VAL A 381       1.364   9.485 -44.328  1.00 97.14           N  
ATOM   1535  CA  VAL A 381       0.430   8.422 -43.936  1.00 96.85           C  
ATOM   1536  C   VAL A 381       1.152   7.096 -43.647  1.00 96.61           C  
ATOM   1537  O   VAL A 381       2.034   6.680 -44.405  1.00 96.59           O  
ATOM   1538  CB  VAL A 381      -0.694   8.238 -45.008  1.00 96.87           C  
ATOM   1539  CG1 VAL A 381      -1.141   6.783 -45.132  1.00 96.86           C  
ATOM   1540  CG2 VAL A 381      -1.882   9.145 -44.701  1.00 96.88           C  
ATOM   1541  N   PHE A 382       0.772   6.449 -42.544  1.00 96.30           N  
ATOM   1542  CA  PHE A 382       1.321   5.143 -42.155  1.00 95.97           C  
ATOM   1543  C   PHE A 382       0.241   4.185 -41.633  1.00 95.71           C  
ATOM   1544  O   PHE A 382      -0.900   4.590 -41.394  1.00 95.70           O  
ATOM   1545  CB  PHE A 382       2.440   5.308 -41.115  1.00 96.00           C  
ATOM   1546  CG  PHE A 382       1.990   5.940 -39.822  1.00 96.07           C  
ATOM   1547  CD1 PHE A 382       2.120   7.312 -39.621  1.00 96.15           C  
ATOM   1548  CD2 PHE A 382       1.448   5.163 -38.799  1.00 96.13           C  
ATOM   1549  CE1 PHE A 382       1.709   7.904 -38.426  1.00 96.20           C  
ATOM   1550  CE2 PHE A 382       1.031   5.745 -37.603  1.00 96.15           C  
ATOM   1551  CZ  PHE A 382       1.165   7.118 -37.415  1.00 96.18           C  
ATOM   1552  N   VAL A 383       0.617   2.918 -41.453  1.00 95.36           N  
ATOM   1553  CA  VAL A 383      -0.297   1.888 -40.951  1.00 95.02           C  
ATOM   1554  C   VAL A 383       0.104   1.436 -39.546  1.00 94.76           C  
ATOM   1555  O   VAL A 383       1.243   1.021 -39.318  1.00 94.73           O  
ATOM   1556  CB  VAL A 383      -0.369   0.665 -41.908  1.00 95.04           C  
ATOM   1557  CG1 VAL A 383      -1.139  -0.491 -41.273  1.00 95.00           C  
ATOM   1558  CG2 VAL A 383      -1.006   1.058 -43.234  1.00 95.04           C  
ATOM   1559  N   GLU A 384      -0.844   1.525 -38.616  1.00 94.43           N  
ATOM   1560  CA  GLU A 384      -0.631   1.107 -37.232  1.00 94.09           C  
ATOM   1561  C   GLU A 384      -1.331  -0.219 -36.947  1.00 93.84           C  
ATOM   1562  O   GLU A 384      -2.557  -0.321 -37.047  1.00 93.83           O  
ATOM   1563  CB  GLU A 384      -1.120   2.188 -36.261  1.00 94.10           C  
ATOM   1564  CG  GLU A 384      -0.852   1.880 -34.792  1.00 94.08           C  
ATOM   1565  CD  GLU A 384      -1.381   2.951 -33.858  1.00 94.14           C  
ATOM   1566  OE1 GLU A 384      -0.994   4.130 -34.009  1.00 94.19           O  
ATOM   1567  OE2 GLU A 384      -2.176   2.610 -32.958  1.00 94.15           O  
ATOM   1568  N   ALA A 385      -0.542  -1.230 -36.595  1.00 93.50           N  
ATOM   1569  CA  ALA A 385      -1.071  -2.542 -36.240  1.00 93.17           C  
ATOM   1570  C   ALA A 385      -1.084  -2.716 -34.724  1.00 92.95           C  
ATOM   1571  O   ALA A 385      -0.121  -2.359 -34.041  1.00 92.92           O  
ATOM   1572  CB  ALA A 385      -0.259  -3.640 -36.902  1.00 93.19           C  
ATOM   1573  N   ASN A 386      -2.187  -3.257 -34.209  1.00 92.65           N  
ATOM   1574  CA  ASN A 386      -2.379  -3.428 -32.769  1.00 92.34           C  
ATOM   1575  C   ASN A 386      -2.978  -4.781 -32.406  1.00 92.11           C  
ATOM   1576  O   ASN A 386      -3.755  -5.352 -33.173  1.00 92.09           O  
ATOM   1577  CB  ASN A 386      -3.269  -2.312 -32.210  1.00 92.34           C  
ATOM   1578  CG  ASN A 386      -2.635  -0.937 -32.329  1.00 92.38           C  
ATOM   1579  OD1 ASN A 386      -1.502  -0.718 -31.896  1.00 92.39           O  
ATOM   1580  ND2 ASN A 386      -3.370   0.002 -32.914  1.00 92.45           N  
ATOM   1581  N   ILE A 387      -2.606  -5.284 -31.232  1.00 91.80           N  
ATOM   1582  CA  ILE A 387      -3.220  -6.482 -30.671  1.00 91.51           C  
ATOM   1583  C   ILE A 387      -4.189  -6.059 -29.566  1.00 91.31           C  
ATOM   1584  O   ILE A 387      -3.768  -5.573 -28.512  1.00 91.31           O  
ATOM   1585  CB  ILE A 387      -2.163  -7.477 -30.128  1.00 91.52           C  
ATOM   1586  CG1 ILE A 387      -1.184  -7.879 -31.239  1.00 91.49           C  
ATOM   1587  CG2 ILE A 387      -2.841  -8.712 -29.526  1.00 91.51           C  
ATOM   1588  CD1 ILE A 387       0.046  -8.630 -30.753  1.00 91.49           C  
ATOM   1589  N   GLN A 388      -5.484  -6.238 -29.819  1.00 91.04           N  
ATOM   1590  CA  GLN A 388      -6.523  -5.797 -28.889  1.00 90.76           C  
ATOM   1591  C   GLN A 388      -7.224  -6.946 -28.180  1.00 90.60           C  
ATOM   1592  O   GLN A 388      -7.503  -7.987 -28.781  1.00 90.56           O  
ATOM   1593  CB  GLN A 388      -7.564  -4.940 -29.609  1.00 90.75           C  
ATOM   1594  CG  GLN A 388      -7.116  -3.522 -29.907  1.00 90.67           C  
ATOM   1595  CD  GLN A 388      -8.206  -2.686 -30.555  1.00 90.64           C  
ATOM   1596  OE1 GLN A 388      -9.360  -3.108 -30.655  1.00 90.52           O  
ATOM   1597  NE2 GLN A 388      -7.844  -1.487 -30.997  1.00 90.73           N  
ATOM   1598  N   HIS A 389      -7.498  -6.738 -26.895  1.00 90.39           N  
ATOM   1599  CA  HIS A 389      -8.306  -7.652 -26.093  1.00 90.19           C  
ATOM   1600  C   HIS A 389      -9.020  -6.856 -25.005  1.00 90.06           C  
ATOM   1601  O   HIS A 389      -8.486  -6.659 -23.911  1.00 90.05           O  
ATOM   1602  CB  HIS A 389      -7.445  -8.760 -25.477  1.00 90.18           C  
ATOM   1603  CG  HIS A 389      -8.234  -9.795 -24.737  1.00 90.12           C  
ATOM   1604  ND1 HIS A 389      -8.615  -9.641 -23.421  1.00 90.11           N  
ATOM   1605  CD2 HIS A 389      -8.720 -10.996 -25.130  1.00 90.09           C  
ATOM   1606  CE1 HIS A 389      -9.300 -10.703 -23.036  1.00 90.08           C  
ATOM   1607  NE2 HIS A 389      -9.376 -11.541 -24.053  1.00 90.07           N  
ATOM   1608  N   GLY A 390     -10.231  -6.401 -25.317  1.00 89.90           N  
ATOM   1609  CA  GLY A 390     -10.995  -5.548 -24.411  1.00 89.70           C  
ATOM   1610  C   GLY A 390     -10.515  -4.112 -24.480  1.00 89.55           C  
ATOM   1611  O   GLY A 390     -10.324  -3.461 -23.449  1.00 89.57           O  
ATOM   1612  N   GLN A 391     -10.311  -3.633 -25.707  1.00 89.40           N  
ATOM   1613  CA  GLN A 391      -9.838  -2.270 -26.000  1.00 89.23           C  
ATOM   1614  C   GLN A 391      -8.391  -1.969 -25.593  1.00 89.13           C  
ATOM   1615  O   GLN A 391      -7.745  -1.110 -26.200  1.00 89.10           O  
ATOM   1616  CB  GLN A 391     -10.788  -1.206 -25.439  1.00 89.23           C  
ATOM   1617  CG  GLN A 391     -12.103  -1.100 -26.190  1.00 89.16           C  
ATOM   1618  CD  GLN A 391     -12.829   0.200 -25.915  1.00 89.12           C  
ATOM   1619  OE1 GLN A 391     -13.335   0.843 -26.834  1.00 89.14           O  
ATOM   1620  NE2 GLN A 391     -12.877   0.600 -24.648  1.00 89.10           N  
ATOM   1621  N   GLN A 392      -7.887  -2.662 -24.575  1.00 89.01           N  
ATOM   1622  CA  GLN A 392      -6.504  -2.470 -24.141  1.00 88.90           C  
ATOM   1623  C   GLN A 392      -5.522  -3.155 -25.092  1.00 88.79           C  
ATOM   1624  O   GLN A 392      -5.670  -4.337 -25.416  1.00 88.78           O  
ATOM   1625  CB  GLN A 392      -6.293  -2.923 -22.687  1.00 88.93           C  
ATOM   1626  CG  GLN A 392      -6.587  -4.396 -22.396  1.00 89.00           C  
ATOM   1627  CD  GLN A 392      -6.009  -4.867 -21.066  1.00 89.07           C  
ATOM   1628  OE1 GLN A 392      -5.545  -6.004 -20.946  1.00 89.08           O  
ATOM   1629  NE2 GLN A 392      -6.030  -3.993 -20.064  1.00 89.09           N  
ATOM   1630  N   VAL A 393      -4.531  -2.392 -25.547  1.00 88.63           N  
ATOM   1631  CA  VAL A 393      -3.523  -2.901 -26.475  1.00 88.48           C  
ATOM   1632  C   VAL A 393      -2.431  -3.681 -25.752  1.00 88.37           C  
ATOM   1633  O   VAL A 393      -1.844  -3.197 -24.783  1.00 88.35           O  
ATOM   1634  CB  VAL A 393      -2.898  -1.780 -27.347  1.00 88.49           C  
ATOM   1635  CG1 VAL A 393      -3.824  -1.425 -28.501  1.00 88.47           C  
ATOM   1636  CG2 VAL A 393      -2.564  -0.543 -26.510  1.00 88.52           C  
ATOM   1637  N   LEU A 394      -2.174  -4.894 -26.229  1.00 88.23           N  
ATOM   1638  CA  LEU A 394      -1.149  -5.752 -25.646  1.00 88.11           C  
ATOM   1639  C   LEU A 394       0.231  -5.447 -26.224  1.00 88.02           C  
ATOM   1640  O   LEU A 394       1.244  -5.590 -25.537  1.00 88.02           O  
ATOM   1641  CB  LEU A 394      -1.504  -7.230 -25.839  1.00 88.12           C  
ATOM   1642  CG  LEU A 394      -2.740  -7.758 -25.099  1.00 88.10           C  
ATOM   1643  CD1 LEU A 394      -3.208  -9.070 -25.704  1.00 88.06           C  
ATOM   1644  CD2 LEU A 394      -2.481  -7.917 -23.603  1.00 88.09           C  
ATOM   1645  N   CYS A 395       0.259  -5.024 -27.487  1.00 87.90           N  
ATOM   1646  CA  CYS A 395       1.499  -4.660 -28.162  1.00 87.78           C  
ATOM   1647  C   CYS A 395       1.201  -3.791 -29.384  1.00 87.74           C  
ATOM   1648  O   CYS A 395       0.119  -3.884 -29.971  1.00 87.72           O  
ATOM   1649  CB  CYS A 395       2.272  -5.916 -28.570  1.00 87.76           C  
ATOM   1650  SG  CYS A 395       4.056  -5.783 -28.375  1.00 87.69           S  
ATOM   1651  N   GLN A 396       2.163  -2.948 -29.758  1.00 87.68           N  
ATOM   1652  CA  GLN A 396       1.988  -2.004 -30.862  1.00 87.61           C  
ATOM   1653  C   GLN A 396       3.209  -1.944 -31.781  1.00 87.57           C  
ATOM   1654  O   GLN A 396       4.341  -1.786 -31.316  1.00 87.56           O  
ATOM   1655  CB  GLN A 396       1.674  -0.607 -30.316  1.00 87.60           C  
ATOM   1656  CG  GLN A 396       1.447   0.459 -31.384  1.00 87.61           C  
ATOM   1657  CD  GLN A 396       1.336   1.858 -30.808  1.00 87.68           C  
ATOM   1658  OE1 GLN A 396       1.527   2.069 -29.610  1.00 87.71           O  
ATOM   1659  NE2 GLN A 396       1.030   2.825 -31.664  1.00 87.78           N  
ATOM   1660  N   ARG A 397       2.959  -2.073 -33.083  1.00 87.53           N  
ATOM   1661  CA  ARG A 397       3.985  -1.892 -34.112  1.00 87.48           C  
ATOM   1662  C   ARG A 397       3.555  -0.822 -35.112  1.00 87.44           C  
ATOM   1663  O   ARG A 397       2.360  -0.580 -35.298  1.00 87.44           O  
ATOM   1664  CB  ARG A 397       4.288  -3.210 -34.837  1.00 87.47           C  
ATOM   1665  CG  ARG A 397       4.816  -4.333 -33.948  1.00 87.50           C  
ATOM   1666  CD  ARG A 397       6.099  -3.949 -33.225  1.00 87.58           C  
ATOM   1667  NE  ARG A 397       6.301  -4.765 -32.030  1.00 87.65           N  
ATOM   1668  CZ  ARG A 397       7.178  -4.495 -31.066  1.00 87.68           C  
ATOM   1669  NH1 ARG A 397       7.950  -3.417 -31.137  1.00 87.68           N  
ATOM   1670  NH2 ARG A 397       7.278  -5.306 -30.021  1.00 87.64           N  
ATOM   1671  N   ARG A 398       4.535  -0.187 -35.750  1.00 87.40           N  
ATOM   1672  CA  ARG A 398       4.275   0.932 -36.653  1.00 87.38           C  
ATOM   1673  C   ARG A 398       5.151   0.868 -37.905  1.00 87.34           C  
ATOM   1674  O   ARG A 398       6.334   0.527 -37.830  1.00 87.33           O  
ATOM   1675  CB  ARG A 398       4.486   2.260 -35.914  1.00 87.38           C  
ATOM   1676  CG  ARG A 398       3.970   3.492 -36.646  1.00 87.44           C  
ATOM   1677  CD  ARG A 398       3.932   4.711 -35.735  1.00 87.60           C  
ATOM   1678  NE  ARG A 398       2.767   4.704 -34.848  1.00 87.70           N  
ATOM   1679  CZ  ARG A 398       2.430   5.696 -34.026  1.00 87.72           C  
ATOM   1680  NH1 ARG A 398       3.164   6.801 -33.960  1.00 87.72           N  
ATOM   1681  NH2 ARG A 398       1.349   5.585 -33.264  1.00 87.66           N  
ATOM   1682  N   THR A 399       4.552   1.195 -39.049  1.00 87.28           N  
ATOM   1683  CA  THR A 399       5.267   1.260 -40.326  1.00 87.22           C  
ATOM   1684  C   THR A 399       5.876   2.646 -40.554  1.00 87.20           C  
ATOM   1685  O   THR A 399       5.522   3.611 -39.872  1.00 87.19           O  
ATOM   1686  CB  THR A 399       4.353   0.899 -41.522  1.00 87.20           C  
ATOM   1687  OG1 THR A 399       3.190   1.736 -41.512  1.00 87.17           O  
ATOM   1688  CG2 THR A 399       3.929  -0.564 -41.461  1.00 87.17           C  
ATOM   1689  N   SER A 400       6.792   2.730 -41.517  1.00 87.18           N  
ATOM   1690  CA  SER A 400       7.483   3.978 -41.841  1.00 87.14           C  
ATOM   1691  C   SER A 400       6.573   4.961 -42.579  1.00 87.10           C  
ATOM   1692  O   SER A 400       5.899   4.579 -43.539  1.00 87.08           O  
ATOM   1693  CB  SER A 400       8.742   3.695 -42.665  1.00 87.14           C  
ATOM   1694  OG  SER A 400       8.438   2.938 -43.824  1.00 87.15           O  
ATOM   1695  N   PRO A 401       6.551   6.231 -42.127  1.00 87.09           N  
ATOM   1696  CA  PRO A 401       5.721   7.273 -42.733  1.00 87.09           C  
ATOM   1697  C   PRO A 401       6.042   7.486 -44.211  1.00 87.08           C  
ATOM   1698  O   PRO A 401       7.215   7.523 -44.594  1.00 87.06           O  
ATOM   1699  CB  PRO A 401       6.083   8.525 -41.923  1.00 87.07           C  
ATOM   1700  CG  PRO A 401       6.573   8.004 -40.623  1.00 87.09           C  
ATOM   1701  CD  PRO A 401       7.298   6.740 -40.963  1.00 87.09           C  
ATOM   1702  N   LYS A 402       4.995   7.605 -45.026  1.00 87.08           N  
ATOM   1703  CA  LYS A 402       5.125   7.838 -46.467  1.00 87.08           C  
ATOM   1704  C   LYS A 402       4.066   8.838 -46.955  1.00 87.11           C  
ATOM   1705  O   LYS A 402       3.023   8.988 -46.312  1.00 87.10           O  
ATOM   1706  CB  LYS A 402       5.018   6.515 -47.241  1.00 87.04           C  
ATOM   1707  CG  LYS A 402       6.277   5.659 -47.193  1.00 86.93           C  
ATOM   1708  CD  LYS A 402       6.134   4.397 -48.024  1.00 86.73           C  
ATOM   1709  CE  LYS A 402       7.427   3.594 -48.029  1.00 86.63           C  
ATOM   1710  NZ  LYS A 402       7.304   2.341 -48.823  1.00 86.52           N  
ATOM   1711  N   PRO A 403       4.336   9.538 -48.080  1.00 87.13           N  
ATOM   1712  CA  PRO A 403       3.342  10.454 -48.658  1.00 87.12           C  
ATOM   1713  C   PRO A 403       2.057   9.735 -49.075  1.00 87.11           C  
ATOM   1714  O   PRO A 403       2.113   8.640 -49.649  1.00 87.11           O  
ATOM   1715  CB  PRO A 403       4.058  11.018 -49.891  1.00 87.14           C  
ATOM   1716  CG  PRO A 403       5.506  10.869 -49.592  1.00 87.14           C  
ATOM   1717  CD  PRO A 403       5.618   9.599 -48.809  1.00 87.13           C  
ATOM   1718  N   PHE A 404       0.915  10.354 -48.781  1.00 87.08           N  
ATOM   1719  CA  PHE A 404      -0.390   9.762 -49.069  1.00 87.04           C  
ATOM   1720  C   PHE A 404      -0.723   9.804 -50.564  1.00 87.01           C  
ATOM   1721  O   PHE A 404      -1.083  10.854 -51.108  1.00 87.00           O  
ATOM   1722  CB  PHE A 404      -1.487  10.434 -48.228  1.00 87.04           C  
ATOM   1723  CG  PHE A 404      -2.816   9.714 -48.255  1.00 87.07           C  
ATOM   1724  CD1 PHE A 404      -2.891   8.335 -48.044  1.00 87.03           C  
ATOM   1725  CD2 PHE A 404      -3.996  10.421 -48.468  1.00 87.12           C  
ATOM   1726  CE1 PHE A 404      -4.117   7.673 -48.064  1.00 86.99           C  
ATOM   1727  CE2 PHE A 404      -5.229   9.766 -48.489  1.00 87.10           C  
ATOM   1728  CZ  PHE A 404      -5.287   8.389 -48.286  1.00 87.05           C  
ATOM   1729  N   THR A 405      -0.574   8.653 -51.217  1.00 86.95           N  
ATOM   1730  CA  THR A 405      -0.931   8.481 -52.626  1.00 86.89           C  
ATOM   1731  C   THR A 405      -2.002   7.399 -52.773  1.00 86.86           C  
ATOM   1732  O   THR A 405      -2.295   6.675 -51.818  1.00 86.86           O  
ATOM   1733  CB  THR A 405       0.291   8.103 -53.488  1.00 86.89           C  
ATOM   1734  OG1 THR A 405       0.938   6.955 -52.924  1.00 86.89           O  
ATOM   1735  CG2 THR A 405       1.280   9.263 -53.570  1.00 86.87           C  
ATOM   1736  N   GLU A 406      -2.572   7.288 -53.973  1.00 86.81           N  
ATOM   1737  CA  GLU A 406      -3.637   6.320 -54.263  1.00 86.74           C  
ATOM   1738  C   GLU A 406      -3.224   4.861 -54.058  1.00 86.66           C  
ATOM   1739  O   GLU A 406      -4.071   3.966 -54.031  1.00 86.65           O  
ATOM   1740  CB  GLU A 406      -4.164   6.520 -55.685  1.00 86.76           C  
ATOM   1741  CG  GLU A 406      -5.170   7.654 -55.807  1.00 86.83           C  
ATOM   1742  CD  GLU A 406      -5.509   8.011 -57.244  1.00 86.93           C  
ATOM   1743  OE1 GLU A 406      -4.941   7.400 -58.178  1.00 86.97           O  
ATOM   1744  OE2 GLU A 406      -6.352   8.913 -57.437  1.00 86.96           O  
ATOM   1745  N   GLU A 407      -1.921   4.633 -53.919  1.00 86.57           N  
ATOM   1746  CA  GLU A 407      -1.389   3.308 -53.634  1.00 86.47           C  
ATOM   1747  C   GLU A 407      -0.042   3.433 -52.930  1.00 86.40           C  
ATOM   1748  O   GLU A 407       0.867   4.101 -53.427  1.00 86.39           O  
ATOM   1749  CB  GLU A 407      -1.256   2.497 -54.926  1.00 86.46           C  
ATOM   1750  CG  GLU A 407      -1.284   0.987 -54.735  1.00 86.46           C  
ATOM   1751  CD  GLU A 407       0.100   0.376 -54.607  1.00 86.44           C  
ATOM   1752  OE1 GLU A 407       0.838   0.737 -53.666  1.00 86.47           O  
ATOM   1753  OE2 GLU A 407       0.447  -0.480 -55.449  1.00 86.43           O  
ATOM   1754  N   VAL A 408       0.071   2.800 -51.764  1.00 86.30           N  
ATOM   1755  CA  VAL A 408       1.323   2.773 -51.009  1.00 86.18           C  
ATOM   1756  C   VAL A 408       1.653   1.335 -50.610  1.00 86.12           C  
ATOM   1757  O   VAL A 408       0.823   0.642 -50.017  1.00 86.11           O  
ATOM   1758  CB  VAL A 408       1.271   3.680 -49.748  1.00 86.17           C  
ATOM   1759  CG1 VAL A 408       2.628   3.717 -49.061  1.00 86.14           C  
ATOM   1760  CG2 VAL A 408       0.831   5.099 -50.106  1.00 86.15           C  
ATOM   1761  N   LEU A 409       2.861   0.894 -50.954  1.00 86.03           N  
ATOM   1762  CA  LEU A 409       3.330  -0.454 -50.627  1.00 85.95           C  
ATOM   1763  C   LEU A 409       4.476  -0.433 -49.621  1.00 85.87           C  
ATOM   1764  O   LEU A 409       5.390   0.392 -49.722  1.00 85.87           O  
ATOM   1765  CB  LEU A 409       3.782  -1.197 -51.890  1.00 85.97           C  
ATOM   1766  CG  LEU A 409       2.741  -1.790 -52.843  1.00 86.00           C  
ATOM   1767  CD1 LEU A 409       3.360  -1.995 -54.214  1.00 86.04           C  
ATOM   1768  CD2 LEU A 409       2.159  -3.098 -52.318  1.00 86.00           C  
ATOM   1769  N   TRP A 410       4.417  -1.352 -48.658  1.00 85.75           N  
ATOM   1770  CA  TRP A 410       5.479  -1.524 -47.666  1.00 85.62           C  
ATOM   1771  C   TRP A 410       6.141  -2.897 -47.797  1.00 85.49           C  
ATOM   1772  O   TRP A 410       7.361  -2.991 -47.945  1.00 85.47           O  
ATOM   1773  CB  TRP A 410       4.937  -1.336 -46.243  1.00 85.64           C  
ATOM   1774  CG  TRP A 410       4.757   0.099 -45.829  1.00 85.72           C  
ATOM   1775  CD1 TRP A 410       5.723   0.944 -45.360  1.00 85.80           C  
ATOM   1776  CD2 TRP A 410       3.536   0.851 -45.832  1.00 85.74           C  
ATOM   1777  NE1 TRP A 410       5.182   2.176 -45.078  1.00 85.79           N  
ATOM   1778  CE2 TRP A 410       3.842   2.147 -45.357  1.00 85.77           C  
ATOM   1779  CE3 TRP A 410       2.214   0.557 -46.192  1.00 85.74           C  
ATOM   1780  CZ2 TRP A 410       2.874   3.150 -45.234  1.00 85.79           C  
ATOM   1781  CZ3 TRP A 410       1.252   1.554 -46.069  1.00 85.79           C  
ATOM   1782  CH2 TRP A 410       1.588   2.834 -45.593  1.00 85.81           C  
ATOM   1783  N   ASN A 411       5.319  -3.948 -47.749  1.00 85.34           N  
ATOM   1784  CA  ASN A 411       5.775  -5.346 -47.737  1.00 85.15           C  
ATOM   1785  C   ASN A 411       6.736  -5.644 -46.579  1.00 85.02           C  
ATOM   1786  O   ASN A 411       7.672  -6.435 -46.715  1.00 84.98           O  
ATOM   1787  CB  ASN A 411       6.382  -5.740 -49.092  1.00 85.17           C  
ATOM   1788  CG  ASN A 411       6.236  -7.219 -49.391  1.00 85.13           C  
ATOM   1789  OD1 ASN A 411       5.143  -7.779 -49.308  1.00 85.19           O  
ATOM   1790  ND2 ASN A 411       7.340  -7.859 -49.753  1.00 85.08           N  
ATOM   1791  N   VAL A 412       6.477  -5.004 -45.439  1.00 84.88           N  
ATOM   1792  CA  VAL A 412       7.339  -5.081 -44.259  1.00 84.73           C  
ATOM   1793  C   VAL A 412       6.675  -5.918 -43.170  1.00 84.65           C  
ATOM   1794  O   VAL A 412       5.476  -5.782 -42.920  1.00 84.65           O  
ATOM   1795  CB  VAL A 412       7.656  -3.664 -43.691  1.00 84.71           C  
ATOM   1796  CG1 VAL A 412       8.637  -3.745 -42.523  1.00 84.68           C  
ATOM   1797  CG2 VAL A 412       8.210  -2.750 -44.776  1.00 84.68           C  
ATOM   1798  N   TRP A 413       7.457  -6.786 -42.533  1.00 84.55           N  
ATOM   1799  CA  TRP A 413       6.990  -7.538 -41.373  1.00 84.46           C  
ATOM   1800  C   TRP A 413       6.967  -6.655 -40.130  1.00 84.35           C  
ATOM   1801  O   TRP A 413       7.895  -5.876 -39.892  1.00 84.37           O  
ATOM   1802  CB  TRP A 413       7.879  -8.756 -41.118  1.00 84.48           C  
ATOM   1803  CG  TRP A 413       7.685  -9.863 -42.100  1.00 84.61           C  
ATOM   1804  CD1 TRP A 413       8.469 -10.145 -43.180  1.00 84.70           C  
ATOM   1805  CD2 TRP A 413       6.641 -10.845 -42.094  1.00 84.72           C  
ATOM   1806  NE1 TRP A 413       7.980 -11.242 -43.848  1.00 84.77           N  
ATOM   1807  CE2 TRP A 413       6.857 -11.691 -43.204  1.00 84.74           C  
ATOM   1808  CE3 TRP A 413       5.542 -11.091 -41.260  1.00 84.81           C  
ATOM   1809  CZ2 TRP A 413       6.016 -12.768 -43.503  1.00 84.78           C  
ATOM   1810  CZ3 TRP A 413       4.705 -12.165 -41.557  1.00 84.84           C  
ATOM   1811  CH2 TRP A 413       4.948 -12.988 -42.670  1.00 84.84           C  
ATOM   1812  N   LEU A 414       5.896  -6.775 -39.351  1.00 84.18           N  
ATOM   1813  CA  LEU A 414       5.797  -6.110 -38.059  1.00 84.00           C  
ATOM   1814  C   LEU A 414       5.750  -7.162 -36.955  1.00 83.88           C  
ATOM   1815  O   LEU A 414       4.688  -7.699 -36.631  1.00 83.89           O  
ATOM   1816  CB  LEU A 414       4.575  -5.186 -38.002  1.00 83.99           C  
ATOM   1817  CG  LEU A 414       4.615  -3.867 -38.783  1.00 83.95           C  
ATOM   1818  CD1 LEU A 414       3.316  -3.105 -38.588  1.00 83.95           C  
ATOM   1819  CD2 LEU A 414       5.802  -2.996 -38.382  1.00 83.94           C  
ATOM   1820  N   GLU A 415       6.920  -7.463 -36.399  1.00 83.70           N  
ATOM   1821  CA  GLU A 415       7.051  -8.493 -35.379  1.00 83.52           C  
ATOM   1822  C   GLU A 415       6.708  -7.948 -33.995  1.00 83.37           C  
ATOM   1823  O   GLU A 415       7.426  -7.109 -33.447  1.00 83.37           O  
ATOM   1824  CB  GLU A 415       8.463  -9.085 -35.399  1.00 83.55           C  
ATOM   1825  CG  GLU A 415       8.618 -10.363 -34.587  1.00 83.64           C  
ATOM   1826  CD  GLU A 415      10.042 -10.884 -34.579  1.00 83.75           C  
ATOM   1827  OE1 GLU A 415      10.534 -11.244 -33.489  1.00 83.85           O  
ATOM   1828  OE2 GLU A 415      10.673 -10.930 -35.656  1.00 83.82           O  
ATOM   1829  N   PHE A 416       5.597  -8.428 -33.446  1.00 83.17           N  
ATOM   1830  CA  PHE A 416       5.163  -8.053 -32.105  1.00 82.98           C  
ATOM   1831  C   PHE A 416       5.943  -8.839 -31.055  1.00 82.85           C  
ATOM   1832  O   PHE A 416       6.432  -9.938 -31.332  1.00 82.84           O  
ATOM   1833  CB  PHE A 416       3.657  -8.285 -31.949  1.00 82.98           C  
ATOM   1834  CG  PHE A 416       2.811  -7.326 -32.741  1.00 82.87           C  
ATOM   1835  CD1 PHE A 416       2.500  -7.582 -34.072  1.00 82.78           C  
ATOM   1836  CD2 PHE A 416       2.325  -6.163 -32.155  1.00 82.76           C  
ATOM   1837  CE1 PHE A 416       1.721  -6.697 -34.805  1.00 82.72           C  
ATOM   1838  CE2 PHE A 416       1.543  -5.273 -32.880  1.00 82.70           C  
ATOM   1839  CZ  PHE A 416       1.242  -5.541 -34.208  1.00 82.70           C  
ATOM   1840  N   SER A 417       6.062  -8.267 -29.857  1.00 82.66           N  
ATOM   1841  CA  SER A 417       6.795  -8.902 -28.760  1.00 82.45           C  
ATOM   1842  C   SER A 417       6.036 -10.083 -28.155  1.00 82.31           C  
ATOM   1843  O   SER A 417       6.647 -10.990 -27.585  1.00 82.29           O  
ATOM   1844  CB  SER A 417       7.132  -7.880 -27.674  1.00 82.45           C  
ATOM   1845  OG  SER A 417       5.953  -7.364 -27.083  1.00 82.45           O  
ATOM   1846  N   ILE A 418       4.711 -10.064 -28.288  1.00 82.12           N  
ATOM   1847  CA  ILE A 418       3.847 -11.122 -27.757  1.00 81.94           C  
ATOM   1848  C   ILE A 418       4.012 -12.422 -28.550  1.00 81.78           C  
ATOM   1849  O   ILE A 418       3.992 -12.416 -29.783  1.00 81.78           O  
ATOM   1850  CB  ILE A 418       2.350 -10.681 -27.734  1.00 81.95           C  
ATOM   1851  CG1 ILE A 418       2.182  -9.297 -27.076  1.00 81.94           C  
ATOM   1852  CG2 ILE A 418       1.460 -11.743 -27.069  1.00 81.91           C  
ATOM   1853  CD1 ILE A 418       2.615  -9.200 -25.604  1.00 81.99           C  
ATOM   1854  N   LYS A 419       4.182 -13.528 -27.830  1.00 81.59           N  
ATOM   1855  CA  LYS A 419       4.352 -14.847 -28.440  1.00 81.42           C  
ATOM   1856  C   LYS A 419       3.033 -15.397 -28.989  1.00 81.28           C  
ATOM   1857  O   LYS A 419       1.954 -14.937 -28.607  1.00 81.28           O  
ATOM   1858  CB  LYS A 419       4.953 -15.831 -27.429  1.00 81.44           C  
ATOM   1859  CG  LYS A 419       6.365 -15.486 -26.970  1.00 81.44           C  
ATOM   1860  CD  LYS A 419       6.891 -16.523 -25.989  1.00 81.41           C  
ATOM   1861  CE  LYS A 419       8.295 -16.182 -25.516  1.00 81.39           C  
ATOM   1862  NZ  LYS A 419       8.827 -17.207 -24.573  1.00 81.36           N  
ATOM   1863  N   ILE A 420       3.132 -16.381 -29.883  1.00 81.09           N  
ATOM   1864  CA  ILE A 420       1.963 -17.029 -30.484  1.00 80.90           C  
ATOM   1865  C   ILE A 420       1.127 -17.767 -29.441  1.00 80.74           C  
ATOM   1866  O   ILE A 420      -0.105 -17.765 -29.506  1.00 80.72           O  
ATOM   1867  CB  ILE A 420       2.376 -17.992 -31.637  1.00 80.91           C  
ATOM   1868  CG1 ILE A 420       2.825 -17.200 -32.875  1.00 80.94           C  
ATOM   1869  CG2 ILE A 420       1.250 -18.977 -31.989  1.00 80.89           C  
ATOM   1870  CD1 ILE A 420       1.761 -16.284 -33.482  1.00 80.89           C  
ATOM   1871  N   LYS A 421       1.806 -18.384 -28.477  1.00 80.56           N  
ATOM   1872  CA  LYS A 421       1.143 -19.122 -27.405  1.00 80.40           C  
ATOM   1873  C   LYS A 421       0.447 -18.182 -26.414  1.00 80.24           C  
ATOM   1874  O   LYS A 421      -0.501 -18.578 -25.732  1.00 80.22           O  
ATOM   1875  CB  LYS A 421       2.152 -20.024 -26.680  1.00 80.42           C  
ATOM   1876  CG  LYS A 421       1.546 -21.244 -25.981  1.00 80.48           C  
ATOM   1877  CD  LYS A 421       1.191 -22.358 -26.969  1.00 80.51           C  
ATOM   1878  CE  LYS A 421       0.596 -23.569 -26.262  1.00 80.46           C  
ATOM   1879  NZ  LYS A 421      -0.744 -23.279 -25.676  1.00 80.49           N  
ATOM   1880  N   ASP A 422       0.914 -16.936 -26.352  1.00 80.01           N  
ATOM   1881  CA  ASP A 422       0.372 -15.942 -25.425  1.00 79.80           C  
ATOM   1882  C   ASP A 422      -0.769 -15.108 -26.023  1.00 79.63           C  
ATOM   1883  O   ASP A 422      -1.037 -13.991 -25.569  1.00 79.60           O  
ATOM   1884  CB  ASP A 422       1.493 -15.029 -24.911  1.00 79.82           C  
ATOM   1885  CG  ASP A 422       2.488 -15.758 -24.020  1.00 79.81           C  
ATOM   1886  OD1 ASP A 422       2.232 -16.923 -23.642  1.00 79.82           O  
ATOM   1887  OD2 ASP A 422       3.532 -15.155 -23.693  1.00 79.80           O  
ATOM   1888  N   LEU A 423      -1.440 -15.653 -27.035  1.00 79.42           N  
ATOM   1889  CA  LEU A 423      -2.594 -14.991 -27.637  1.00 79.22           C  
ATOM   1890  C   LEU A 423      -3.894 -15.469 -26.985  1.00 79.04           C  
ATOM   1891  O   LEU A 423      -4.216 -16.660 -27.044  1.00 79.02           O  
ATOM   1892  CB  LEU A 423      -2.635 -15.224 -29.152  1.00 79.25           C  
ATOM   1893  CG  LEU A 423      -1.541 -14.612 -30.034  1.00 79.28           C  
ATOM   1894  CD1 LEU A 423      -1.642 -15.168 -31.445  1.00 79.31           C  
ATOM   1895  CD2 LEU A 423      -1.611 -13.089 -30.056  1.00 79.28           C  
ATOM   1896  N   PRO A 424      -4.640 -14.542 -26.352  1.00 78.86           N  
ATOM   1897  CA  PRO A 424      -5.888 -14.898 -25.676  1.00 78.71           C  
ATOM   1898  C   PRO A 424      -7.042 -15.086 -26.655  1.00 78.56           C  
ATOM   1899  O   PRO A 424      -7.058 -14.466 -27.720  1.00 78.54           O  
ATOM   1900  CB  PRO A 424      -6.149 -13.695 -24.768  1.00 78.70           C  
ATOM   1901  CG  PRO A 424      -5.505 -12.556 -25.461  1.00 78.76           C  
ATOM   1902  CD  PRO A 424      -4.326 -13.108 -26.214  1.00 78.84           C  
ATOM   1903  N   LYS A 425      -7.994 -15.940 -26.287  1.00 78.39           N  
ATOM   1904  CA  LYS A 425      -9.165 -16.205 -27.115  1.00 78.22           C  
ATOM   1905  C   LYS A 425      -9.956 -14.923 -27.336  1.00 78.10           C  
ATOM   1906  O   LYS A 425     -10.370 -14.263 -26.381  1.00 78.09           O  
ATOM   1907  CB  LYS A 425     -10.053 -17.278 -26.474  1.00 78.25           C  
ATOM   1908  CG  LYS A 425     -11.300 -17.645 -27.279  1.00 78.22           C  
ATOM   1909  CD  LYS A 425     -10.978 -18.576 -28.444  1.00 78.24           C  
ATOM   1910  CE  LYS A 425     -12.194 -18.803 -29.331  1.00 78.27           C  
ATOM   1911  NZ  LYS A 425     -13.304 -19.501 -28.622  1.00 78.32           N  
ATOM   1912  N   GLY A 426     -10.147 -14.576 -28.603  1.00 77.96           N  
ATOM   1913  CA  GLY A 426     -10.859 -13.360 -28.970  1.00 77.81           C  
ATOM   1914  C   GLY A 426      -9.943 -12.157 -29.053  1.00 77.71           C  
ATOM   1915  O   GLY A 426     -10.306 -11.062 -28.620  1.00 77.72           O  
ATOM   1916  N   ALA A 427      -8.751 -12.366 -29.603  1.00 77.58           N  
ATOM   1917  CA  ALA A 427      -7.800 -11.285 -29.828  1.00 77.44           C  
ATOM   1918  C   ALA A 427      -8.067 -10.636 -31.179  1.00 77.33           C  
ATOM   1919  O   ALA A 427      -8.446 -11.314 -32.136  1.00 77.31           O  
ATOM   1920  CB  ALA A 427      -6.381 -11.808 -29.760  1.00 77.45           C  
ATOM   1921  N   LEU A 428      -7.873  -9.322 -31.248  1.00 77.21           N  
ATOM   1922  CA  LEU A 428      -8.136  -8.569 -32.471  1.00 77.13           C  
ATOM   1923  C   LEU A 428      -6.869  -7.959 -33.055  1.00 77.06           C  
ATOM   1924  O   LEU A 428      -6.084  -7.333 -32.342  1.00 77.06           O  
ATOM   1925  CB  LEU A 428      -9.174  -7.464 -32.224  1.00 77.12           C  
ATOM   1926  CG  LEU A 428     -10.655  -7.781 -31.955  1.00 77.14           C  
ATOM   1927  CD1 LEU A 428     -11.253  -8.683 -33.031  1.00 77.13           C  
ATOM   1928  CD2 LEU A 428     -10.887  -8.369 -30.561  1.00 77.17           C  
ATOM   1929  N   LEU A 429      -6.680  -8.151 -34.356  1.00 76.99           N  
ATOM   1930  CA  LEU A 429      -5.610  -7.487 -35.083  1.00 76.94           C  
ATOM   1931  C   LEU A 429      -6.138  -6.161 -35.619  1.00 76.90           C  
ATOM   1932  O   LEU A 429      -6.739  -6.102 -36.695  1.00 76.91           O  
ATOM   1933  CB  LEU A 429      -5.090  -8.371 -36.221  1.00 76.95           C  
ATOM   1934  CG  LEU A 429      -3.875  -7.881 -37.015  1.00 76.95           C  
ATOM   1935  CD1 LEU A 429      -2.582  -8.070 -36.231  1.00 76.95           C  
ATOM   1936  CD2 LEU A 429      -3.799  -8.591 -38.356  1.00 76.91           C  
ATOM   1937  N   ASN A 430      -5.923  -5.101 -34.848  1.00 76.84           N  
ATOM   1938  CA  ASN A 430      -6.417  -3.778 -35.204  1.00 76.79           C  
ATOM   1939  C   ASN A 430      -5.483  -3.056 -36.172  1.00 76.77           C  
ATOM   1940  O   ASN A 430      -4.429  -2.554 -35.773  1.00 76.79           O  
ATOM   1941  CB  ASN A 430      -6.651  -2.940 -33.942  1.00 76.79           C  
ATOM   1942  CG  ASN A 430      -7.187  -1.549 -34.246  1.00 76.79           C  
ATOM   1943  OD1 ASN A 430      -6.695  -0.557 -33.713  1.00 76.78           O  
ATOM   1944  ND2 ASN A 430      -8.198  -1.473 -35.105  1.00 76.79           N  
ATOM   1945  N   LEU A 431      -5.880  -3.014 -37.442  1.00 76.71           N  
ATOM   1946  CA  LEU A 431      -5.118  -2.316 -38.478  1.00 76.64           C  
ATOM   1947  C   LEU A 431      -5.742  -0.953 -38.753  1.00 76.62           C  
ATOM   1948  O   LEU A 431      -6.910  -0.861 -39.140  1.00 76.61           O  
ATOM   1949  CB  LEU A 431      -5.048  -3.150 -39.764  1.00 76.62           C  
ATOM   1950  CG  LEU A 431      -4.486  -4.575 -39.676  1.00 76.54           C  
ATOM   1951  CD1 LEU A 431      -4.835  -5.378 -40.922  1.00 76.50           C  
ATOM   1952  CD2 LEU A 431      -2.981  -4.575 -39.438  1.00 76.47           C  
ATOM   1953  N   GLN A 432      -4.960   0.101 -38.534  1.00 76.61           N  
ATOM   1954  CA  GLN A 432      -5.448   1.472 -38.669  1.00 76.63           C  
ATOM   1955  C   GLN A 432      -4.507   2.343 -39.493  1.00 76.64           C  
ATOM   1956  O   GLN A 432      -3.291   2.324 -39.294  1.00 76.63           O  
ATOM   1957  CB  GLN A 432      -5.666   2.107 -37.292  1.00 76.64           C  
ATOM   1958  CG  GLN A 432      -6.803   1.492 -36.481  1.00 76.65           C  
ATOM   1959  CD  GLN A 432      -7.054   2.204 -35.163  1.00 76.64           C  
ATOM   1960  OE1 GLN A 432      -8.201   2.375 -34.752  1.00 76.59           O  
ATOM   1961  NE2 GLN A 432      -5.983   2.619 -34.492  1.00 76.68           N  
ATOM   1962  N   ILE A 433      -5.084   3.107 -40.415  1.00 76.66           N  
ATOM   1963  CA  ILE A 433      -4.328   4.060 -41.219  1.00 76.69           C  
ATOM   1964  C   ILE A 433      -4.423   5.459 -40.611  1.00 76.71           C  
ATOM   1965  O   ILE A 433      -5.506   6.050 -40.543  1.00 76.70           O  
ATOM   1966  CB  ILE A 433      -4.809   4.077 -42.688  1.00 76.68           C  
ATOM   1967  CG1 ILE A 433      -4.404   2.780 -43.389  1.00 76.66           C  
ATOM   1968  CG2 ILE A 433      -4.247   5.291 -43.434  1.00 76.70           C  
ATOM   1969  CD1 ILE A 433      -4.911   2.667 -44.805  1.00 76.72           C  
ATOM   1970  N   TYR A 434      -3.279   5.973 -40.168  1.00 76.73           N  
ATOM   1971  CA  TYR A 434      -3.194   7.310 -39.587  1.00 76.75           C  
ATOM   1972  C   TYR A 434      -2.654   8.310 -40.606  1.00 76.76           C  
ATOM   1973  O   TYR A 434      -2.058   7.921 -41.613  1.00 76.74           O  
ATOM   1974  CB  TYR A 434      -2.306   7.296 -38.339  1.00 76.75           C  
ATOM   1975  CG  TYR A 434      -2.975   6.770 -37.083  1.00 76.72           C  
ATOM   1976  CD1 TYR A 434      -3.493   7.647 -36.129  1.00 76.67           C  
ATOM   1977  CD2 TYR A 434      -3.080   5.399 -36.841  1.00 76.71           C  
ATOM   1978  CE1 TYR A 434      -4.102   7.174 -34.968  1.00 76.66           C  
ATOM   1979  CE2 TYR A 434      -3.690   4.915 -35.685  1.00 76.69           C  
ATOM   1980  CZ  TYR A 434      -4.196   5.808 -34.752  1.00 76.66           C  
ATOM   1981  OH  TYR A 434      -4.799   5.336 -33.607  1.00 76.65           O  
ATOM   1982  N   CYS A 435      -2.870   9.595 -40.338  1.00 76.78           N  
ATOM   1983  CA  CYS A 435      -2.369  10.659 -41.203  1.00 76.80           C  
ATOM   1984  C   CYS A 435      -1.440  11.600 -40.443  1.00 76.77           C  
ATOM   1985  O   CYS A 435      -0.219  11.547 -40.607  1.00 76.75           O  
ATOM   1986  CB  CYS A 435      -3.527  11.445 -41.812  1.00 76.80           C  
ATOM   1987  SG  CYS A 435      -3.011  12.659 -43.043  1.00 76.97           S  
ATOM   1988  N   LEU A 460      -5.977   9.494 -37.896  1.00 65.58           N  
ATOM   1989  CA  LEU A 460      -6.641   8.243 -38.244  1.00 65.61           C  
ATOM   1990  C   LEU A 460      -7.716   8.481 -39.302  1.00 65.59           C  
ATOM   1991  O   LEU A 460      -8.570   9.360 -39.147  1.00 65.58           O  
ATOM   1992  CB  LEU A 460      -7.261   7.597 -37.000  1.00 65.61           C  
ATOM   1993  CG  LEU A 460      -7.144   6.079 -36.788  1.00 65.62           C  
ATOM   1994  CD1 LEU A 460      -7.764   5.697 -35.452  1.00 65.62           C  
ATOM   1995  CD2 LEU A 460      -7.761   5.252 -37.912  1.00 65.66           C  
ATOM   1996  N   LEU A 461      -7.671   7.689 -40.371  1.00 65.54           N  
ATOM   1997  CA  LEU A 461      -8.603   7.842 -41.485  1.00 65.49           C  
ATOM   1998  C   LEU A 461      -9.339   6.549 -41.824  1.00 65.43           C  
ATOM   1999  O   LEU A 461     -10.512   6.580 -42.202  1.00 65.44           O  
ATOM   2000  CB  LEU A 461      -7.883   8.394 -42.722  1.00 65.50           C  
ATOM   2001  CG  LEU A 461      -7.253   9.792 -42.618  1.00 65.56           C  
ATOM   2002  CD1 LEU A 461      -6.365  10.072 -43.823  1.00 65.67           C  
ATOM   2003  CD2 LEU A 461      -8.301  10.897 -42.451  1.00 65.56           C  
ATOM   2004  N   TYR A 462      -8.654   5.418 -41.683  1.00 65.35           N  
ATOM   2005  CA  TYR A 462      -9.248   4.118 -41.988  1.00 65.28           C  
ATOM   2006  C   TYR A 462      -8.889   3.066 -40.945  1.00 65.16           C  
ATOM   2007  O   TYR A 462      -7.771   3.050 -40.431  1.00 65.15           O  
ATOM   2008  CB  TYR A 462      -8.829   3.643 -43.384  1.00 65.34           C  
ATOM   2009  CG  TYR A 462      -9.345   4.504 -44.519  1.00 65.54           C  
ATOM   2010  CD1 TYR A 462     -10.675   4.418 -44.941  1.00 65.69           C  
ATOM   2011  CD2 TYR A 462      -8.503   5.401 -45.176  1.00 65.72           C  
ATOM   2012  CE1 TYR A 462     -11.153   5.206 -45.986  1.00 65.81           C  
ATOM   2013  CE2 TYR A 462      -8.970   6.195 -46.222  1.00 65.82           C  
ATOM   2014  CZ  TYR A 462     -10.295   6.092 -46.621  1.00 65.89           C  
ATOM   2015  OH  TYR A 462     -10.762   6.873 -47.654  1.00 65.95           O  
ATOM   2016  N   TYR A 463      -9.844   2.188 -40.643  1.00 65.02           N  
ATOM   2017  CA  TYR A 463      -9.631   1.115 -39.671  1.00 64.89           C  
ATOM   2018  C   TYR A 463     -10.303  -0.188 -40.090  1.00 64.84           C  
ATOM   2019  O   TYR A 463     -11.353  -0.176 -40.737  1.00 64.81           O  
ATOM   2020  CB  TYR A 463     -10.108   1.537 -38.271  1.00 64.87           C  
ATOM   2021  CG  TYR A 463     -11.608   1.720 -38.130  1.00 64.74           C  
ATOM   2022  CD1 TYR A 463     -12.427   0.663 -37.726  1.00 64.57           C  
ATOM   2023  CD2 TYR A 463     -12.207   2.954 -38.385  1.00 64.65           C  
ATOM   2024  CE1 TYR A 463     -13.803   0.827 -37.595  1.00 64.50           C  
ATOM   2025  CE2 TYR A 463     -13.584   3.129 -38.254  1.00 64.55           C  
ATOM   2026  CZ  TYR A 463     -14.374   2.063 -37.858  1.00 64.51           C  
ATOM   2027  OH  TYR A 463     -15.734   2.236 -37.729  1.00 64.36           O  
ATOM   2028  N   VAL A 464      -9.683  -1.306 -39.714  1.00 64.81           N  
ATOM   2029  CA  VAL A 464     -10.263  -2.636 -39.914  1.00 64.79           C  
ATOM   2030  C   VAL A 464      -9.759  -3.618 -38.847  1.00 64.76           C  
ATOM   2031  O   VAL A 464      -8.633  -3.493 -38.354  1.00 64.75           O  
ATOM   2032  CB  VAL A 464     -10.020  -3.172 -41.361  1.00 64.79           C  
ATOM   2033  CG1 VAL A 464      -8.564  -3.581 -41.574  1.00 64.85           C  
ATOM   2034  CG2 VAL A 464     -10.968  -4.320 -41.683  1.00 64.78           C  
ATOM   2035  N   ASN A 465     -10.608  -4.577 -38.485  1.00 64.72           N  
ATOM   2036  CA  ASN A 465     -10.265  -5.572 -37.475  1.00 64.71           C  
ATOM   2037  C   ASN A 465     -10.307  -6.996 -38.009  1.00 64.68           C  
ATOM   2038  O   ASN A 465     -11.079  -7.309 -38.917  1.00 64.67           O  
ATOM   2039  CB  ASN A 465     -11.178  -5.439 -36.252  1.00 64.72           C  
ATOM   2040  CG  ASN A 465     -10.924  -4.166 -35.464  1.00 64.76           C  
ATOM   2041  OD1 ASN A 465      -9.779  -3.761 -35.260  1.00 64.86           O  
ATOM   2042  ND2 ASN A 465     -11.998  -3.535 -35.007  1.00 64.81           N  
ATOM   2043  N   LEU A 466      -9.463  -7.849 -37.438  1.00 64.65           N  
ATOM   2044  CA  LEU A 466      -9.407  -9.258 -37.801  1.00 64.66           C  
ATOM   2045  C   LEU A 466      -9.054 -10.095 -36.580  1.00 64.68           C  
ATOM   2046  O   LEU A 466      -8.094  -9.793 -35.868  1.00 64.65           O  
ATOM   2047  CB  LEU A 466      -8.379  -9.486 -38.916  1.00 64.67           C  
ATOM   2048  CG  LEU A 466      -8.224 -10.894 -39.505  1.00 64.64           C  
ATOM   2049  CD1 LEU A 466      -9.395 -11.252 -40.408  1.00 64.69           C  
ATOM   2050  CD2 LEU A 466      -6.915 -11.015 -40.268  1.00 64.52           C  
ATOM   2051  N   LEU A 467      -9.839 -11.143 -36.346  1.00 64.72           N  
ATOM   2052  CA  LEU A 467      -9.607 -12.050 -35.226  1.00 64.79           C  
ATOM   2053  C   LEU A 467      -8.328 -12.854 -35.419  1.00 64.86           C  
ATOM   2054  O   LEU A 467      -8.134 -13.489 -36.459  1.00 64.86           O  
ATOM   2055  CB  LEU A 467     -10.799 -12.991 -35.035  1.00 64.78           C  
ATOM   2056  CG  LEU A 467     -12.044 -12.411 -34.363  1.00 64.70           C  
ATOM   2057  CD1 LEU A 467     -13.283 -13.155 -34.826  1.00 64.64           C  
ATOM   2058  CD2 LEU A 467     -11.917 -12.447 -32.843  1.00 64.61           C  
ATOM   2059  N   LEU A 468      -7.458 -12.809 -34.413  1.00 64.95           N  
ATOM   2060  CA  LEU A 468      -6.198 -13.547 -34.437  1.00 65.02           C  
ATOM   2061  C   LEU A 468      -6.436 -15.032 -34.197  1.00 65.07           C  
ATOM   2062  O   LEU A 468      -5.676 -15.873 -34.678  1.00 65.06           O  
ATOM   2063  CB  LEU A 468      -5.211 -12.980 -33.407  1.00 65.04           C  
ATOM   2064  CG  LEU A 468      -4.655 -11.567 -33.649  1.00 65.11           C  
ATOM   2065  CD1 LEU A 468      -3.904 -11.059 -32.426  1.00 65.12           C  
ATOM   2066  CD2 LEU A 468      -3.762 -11.508 -34.888  1.00 65.07           C  
ATOM   2067  N   ILE A 469      -7.493 -15.338 -33.446  1.00 65.14           N  
ATOM   2068  CA  ILE A 469      -7.958 -16.711 -33.251  1.00 65.23           C  
ATOM   2069  C   ILE A 469      -9.402 -16.812 -33.740  1.00 65.28           C  
ATOM   2070  O   ILE A 469     -10.266 -16.048 -33.303  1.00 65.26           O  
ATOM   2071  CB  ILE A 469      -7.845 -17.162 -31.768  1.00 65.22           C  
ATOM   2072  CG1 ILE A 469      -6.385 -17.122 -31.302  1.00 65.22           C  
ATOM   2073  CG2 ILE A 469      -8.418 -18.569 -31.578  1.00 65.22           C  
ATOM   2074  CD1 ILE A 469      -6.207 -17.095 -29.795  1.00 65.22           C  
ATOM   2075  N   ASP A 470      -9.650 -17.748 -34.654  1.00 65.39           N  
ATOM   2076  CA  ASP A 470     -10.976 -17.932 -35.243  1.00 65.50           C  
ATOM   2077  C   ASP A 470     -11.932 -18.669 -34.303  1.00 65.55           C  
ATOM   2078  O   ASP A 470     -11.556 -19.043 -33.190  1.00 65.55           O  
ATOM   2079  CB  ASP A 470     -10.878 -18.645 -36.604  1.00 65.50           C  
ATOM   2080  CG  ASP A 470     -10.333 -20.069 -36.501  1.00 65.53           C  
ATOM   2081  OD1 ASP A 470     -10.275 -20.637 -35.387  1.00 65.46           O  
ATOM   2082  OD2 ASP A 470      -9.968 -20.630 -37.556  1.00 65.57           O  
ATOM   2083  N   HIS A 471     -13.161 -18.880 -34.769  1.00 65.65           N  
ATOM   2084  CA  HIS A 471     -14.204 -19.559 -33.998  1.00 65.74           C  
ATOM   2085  C   HIS A 471     -13.894 -21.035 -33.741  1.00 65.84           C  
ATOM   2086  O   HIS A 471     -14.519 -21.666 -32.885  1.00 65.88           O  
ATOM   2087  CB  HIS A 471     -15.553 -19.418 -34.706  1.00 65.72           C  
ATOM   2088  CG  HIS A 471     -15.518 -19.798 -36.153  1.00 65.66           C  
ATOM   2089  ND1 HIS A 471     -15.039 -18.955 -37.132  1.00 65.61           N  
ATOM   2090  CD2 HIS A 471     -15.902 -20.931 -36.786  1.00 65.63           C  
ATOM   2091  CE1 HIS A 471     -15.129 -19.552 -38.307  1.00 65.67           C  
ATOM   2092  NE2 HIS A 471     -15.651 -20.752 -38.125  1.00 65.67           N  
ATOM   2093  N   ARG A 472     -12.925 -21.570 -34.482  1.00 65.94           N  
ATOM   2094  CA  ARG A 472     -12.526 -22.978 -34.382  1.00 66.04           C  
ATOM   2095  C   ARG A 472     -11.324 -23.167 -33.455  1.00 66.11           C  
ATOM   2096  O   ARG A 472     -10.763 -24.265 -33.374  1.00 66.13           O  
ATOM   2097  CB  ARG A 472     -12.193 -23.533 -35.774  1.00 66.03           C  
ATOM   2098  CG  ARG A 472     -13.317 -23.431 -36.788  1.00 65.98           C  
ATOM   2099  CD  ARG A 472     -14.146 -24.708 -36.860  1.00 65.94           C  
ATOM   2100  NE  ARG A 472     -15.358 -24.535 -37.664  1.00 66.00           N  
ATOM   2101  CZ  ARG A 472     -15.376 -24.286 -38.973  1.00 66.06           C  
ATOM   2102  NH1 ARG A 472     -14.245 -24.161 -39.660  1.00 66.05           N  
ATOM   2103  NH2 ARG A 472     -16.536 -24.149 -39.601  1.00 66.10           N  
ATOM   2104  N   PHE A 473     -10.939 -22.094 -32.762  1.00 66.18           N  
ATOM   2105  CA  PHE A 473      -9.745 -22.059 -31.905  1.00 66.23           C  
ATOM   2106  C   PHE A 473      -8.439 -22.093 -32.703  1.00 66.26           C  
ATOM   2107  O   PHE A 473      -7.355 -22.026 -32.123  1.00 66.28           O  
ATOM   2108  CB  PHE A 473      -9.765 -23.184 -30.855  1.00 66.24           C  
ATOM   2109  CG  PHE A 473     -10.834 -23.027 -29.811  1.00 66.29           C  
ATOM   2110  CD1 PHE A 473     -12.102 -23.572 -30.004  1.00 66.32           C  
ATOM   2111  CD2 PHE A 473     -10.571 -22.346 -28.625  1.00 66.31           C  
ATOM   2112  CE1 PHE A 473     -13.094 -23.433 -29.033  1.00 66.33           C  
ATOM   2113  CE2 PHE A 473     -11.556 -22.202 -27.647  1.00 66.29           C  
ATOM   2114  CZ  PHE A 473     -12.820 -22.746 -27.853  1.00 66.30           C  
ATOM   2115  N   LEU A 474      -8.550 -22.184 -34.027  1.00 66.29           N  
ATOM   2116  CA  LEU A 474      -7.388 -22.261 -34.914  1.00 66.35           C  
ATOM   2117  C   LEU A 474      -6.748 -20.891 -35.121  1.00 66.38           C  
ATOM   2118  O   LEU A 474      -7.442 -19.874 -35.152  1.00 66.37           O  
ATOM   2119  CB  LEU A 474      -7.786 -22.841 -36.280  1.00 66.37           C  
ATOM   2120  CG  LEU A 474      -8.461 -24.214 -36.413  1.00 66.39           C  
ATOM   2121  CD1 LEU A 474      -9.085 -24.353 -37.796  1.00 66.40           C  
ATOM   2122  CD2 LEU A 474      -7.496 -25.367 -36.143  1.00 66.40           C  
ATOM   2123  N   LEU A 475      -5.425 -20.872 -35.270  1.00 66.42           N  
ATOM   2124  CA  LEU A 475      -4.710 -19.643 -35.599  1.00 66.48           C  
ATOM   2125  C   LEU A 475      -4.956 -19.275 -37.061  1.00 66.53           C  
ATOM   2126  O   LEU A 475      -4.802 -20.113 -37.954  1.00 66.56           O  
ATOM   2127  CB  LEU A 475      -3.209 -19.790 -35.319  1.00 66.48           C  
ATOM   2128  CG  LEU A 475      -2.309 -18.557 -35.487  1.00 66.49           C  
ATOM   2129  CD1 LEU A 475      -2.505 -17.553 -34.354  1.00 66.46           C  
ATOM   2130  CD2 LEU A 475      -0.848 -18.972 -35.579  1.00 66.57           C  
ATOM   2131  N   ARG A 476      -5.348 -18.024 -37.290  1.00 66.54           N  
ATOM   2132  CA  ARG A 476      -5.633 -17.521 -38.633  1.00 66.54           C  
ATOM   2133  C   ARG A 476      -4.349 -17.400 -39.458  1.00 66.53           C  
ATOM   2134  O   ARG A 476      -3.336 -16.891 -38.974  1.00 66.54           O  
ATOM   2135  CB  ARG A 476      -6.367 -16.180 -38.548  1.00 66.55           C  
ATOM   2136  CG  ARG A 476      -6.820 -15.615 -39.882  1.00 66.62           C  
ATOM   2137  CD  ARG A 476      -7.954 -14.618 -39.708  1.00 66.78           C  
ATOM   2138  NE  ARG A 476      -9.270 -15.246 -39.817  1.00 66.89           N  
ATOM   2139  CZ  ARG A 476     -10.008 -15.656 -38.787  1.00 66.95           C  
ATOM   2140  NH1 ARG A 476      -9.575 -15.512 -37.541  1.00 66.98           N  
ATOM   2141  NH2 ARG A 476     -11.190 -16.215 -39.008  1.00 66.99           N  
ATOM   2142  N   ARG A 477      -4.404 -17.882 -40.698  1.00 66.49           N  
ATOM   2143  CA  ARG A 477      -3.235 -17.934 -41.572  1.00 66.44           C  
ATOM   2144  C   ARG A 477      -3.643 -17.755 -43.034  1.00 66.36           C  
ATOM   2145  O   ARG A 477      -4.689 -18.248 -43.459  1.00 66.35           O  
ATOM   2146  CB  ARG A 477      -2.511 -19.271 -41.387  1.00 66.46           C  
ATOM   2147  CG  ARG A 477      -1.062 -19.281 -41.845  1.00 66.66           C  
ATOM   2148  CD  ARG A 477      -0.458 -20.681 -41.776  1.00 67.03           C  
ATOM   2149  NE  ARG A 477      -0.940 -21.559 -42.845  1.00 67.36           N  
ATOM   2150  CZ  ARG A 477      -0.410 -21.633 -44.066  1.00 67.52           C  
ATOM   2151  NH1 ARG A 477       0.630 -20.877 -44.401  1.00 67.57           N  
ATOM   2152  NH2 ARG A 477      -0.926 -22.467 -44.961  1.00 67.56           N  
ATOM   2153  N   GLY A 478      -2.816 -17.041 -43.794  1.00 66.26           N  
ATOM   2154  CA  GLY A 478      -3.039 -16.869 -45.228  1.00 66.12           C  
ATOM   2155  C   GLY A 478      -2.997 -15.430 -45.704  1.00 66.02           C  
ATOM   2156  O   GLY A 478      -2.616 -14.526 -44.956  1.00 65.99           O  
ATOM   2157  N   GLU A 479      -3.382 -15.232 -46.963  1.00 65.94           N  
ATOM   2158  CA  GLU A 479      -3.459 -13.902 -47.568  1.00 65.87           C  
ATOM   2159  C   GLU A 479      -4.817 -13.271 -47.268  1.00 65.76           C  
ATOM   2160  O   GLU A 479      -5.852 -13.937 -47.362  1.00 65.78           O  
ATOM   2161  CB  GLU A 479      -3.250 -13.987 -49.087  1.00 65.90           C  
ATOM   2162  CG  GLU A 479      -1.926 -14.614 -49.532  1.00 66.07           C  
ATOM   2163  CD  GLU A 479      -0.733 -13.667 -49.429  1.00 66.39           C  
ATOM   2164  OE1 GLU A 479      -0.926 -12.460 -49.158  1.00 66.50           O  
ATOM   2165  OE2 GLU A 479       0.409 -14.135 -49.627  1.00 66.51           O  
ATOM   2166  N   TYR A 480      -4.815 -11.993 -46.900  1.00 65.61           N  
ATOM   2167  CA  TYR A 480      -6.061 -11.285 -46.609  1.00 65.46           C  
ATOM   2168  C   TYR A 480      -6.057  -9.856 -47.144  1.00 65.42           C  
ATOM   2169  O   TYR A 480      -5.162  -9.065 -46.835  1.00 65.41           O  
ATOM   2170  CB  TYR A 480      -6.352 -11.282 -45.103  1.00 65.43           C  
ATOM   2171  CG  TYR A 480      -6.731 -12.629 -44.531  1.00 65.29           C  
ATOM   2172  CD1 TYR A 480      -5.775 -13.447 -43.928  1.00 65.23           C  
ATOM   2173  CD2 TYR A 480      -8.047 -13.084 -44.585  1.00 65.22           C  
ATOM   2174  CE1 TYR A 480      -6.119 -14.689 -43.398  1.00 65.18           C  
ATOM   2175  CE2 TYR A 480      -8.404 -14.322 -44.058  1.00 65.22           C  
ATOM   2176  CZ  TYR A 480      -7.436 -15.119 -43.467  1.00 65.19           C  
ATOM   2177  OH  TYR A 480      -7.789 -16.343 -42.947  1.00 65.13           O  
ATOM   2178  N   VAL A 481      -7.061  -9.540 -47.958  1.00 65.37           N  
ATOM   2179  CA  VAL A 481      -7.276  -8.174 -48.426  1.00 65.33           C  
ATOM   2180  C   VAL A 481      -8.564  -7.648 -47.806  1.00 65.30           C  
ATOM   2181  O   VAL A 481      -9.665  -8.076 -48.169  1.00 65.32           O  
ATOM   2182  CB  VAL A 481      -7.329  -8.071 -49.972  1.00 65.33           C  
ATOM   2183  CG1 VAL A 481      -7.584  -6.630 -50.403  1.00 65.35           C  
ATOM   2184  CG2 VAL A 481      -6.034  -8.575 -50.592  1.00 65.36           C  
ATOM   2185  N   LEU A 482      -8.412  -6.726 -46.862  1.00 65.23           N  
ATOM   2186  CA  LEU A 482      -9.540  -6.203 -46.100  1.00 65.17           C  
ATOM   2187  C   LEU A 482      -9.920  -4.803 -46.560  1.00 65.14           C  
ATOM   2188  O   LEU A 482      -9.072  -4.043 -47.033  1.00 65.14           O  
ATOM   2189  CB  LEU A 482      -9.214  -6.195 -44.604  1.00 65.18           C  
ATOM   2190  CG  LEU A 482      -8.697  -7.495 -43.975  1.00 65.18           C  
ATOM   2191  CD1 LEU A 482      -8.021  -7.211 -42.643  1.00 65.22           C  
ATOM   2192  CD2 LEU A 482      -9.806  -8.531 -43.814  1.00 65.21           C  
ATOM   2193  N   HIS A 483     -11.201  -4.475 -46.422  1.00 65.08           N  
ATOM   2194  CA  HIS A 483     -11.699  -3.145 -46.760  1.00 65.01           C  
ATOM   2195  C   HIS A 483     -12.053  -2.359 -45.502  1.00 64.95           C  
ATOM   2196  O   HIS A 483     -12.902  -2.772 -44.709  1.00 64.93           O  
ATOM   2197  CB  HIS A 483     -12.882  -3.240 -47.721  1.00 65.04           C  
ATOM   2198  CG  HIS A 483     -12.513  -3.776 -49.069  1.00 65.08           C  
ATOM   2199  ND1 HIS A 483     -12.118  -2.964 -50.111  1.00 65.14           N  
ATOM   2200  CD2 HIS A 483     -12.459  -5.045 -49.539  1.00 65.12           C  
ATOM   2201  CE1 HIS A 483     -11.848  -3.709 -51.168  1.00 65.14           C  
ATOM   2202  NE2 HIS A 483     -12.046  -4.975 -50.848  1.00 65.14           N  
ATOM   2203  N   MET A 484     -11.389  -1.219 -45.341  1.00 64.89           N  
ATOM   2204  CA  MET A 484     -11.399  -0.468 -44.089  1.00 64.83           C  
ATOM   2205  C   MET A 484     -12.519   0.563 -44.022  1.00 64.80           C  
ATOM   2206  O   MET A 484     -12.880   1.169 -45.034  1.00 64.80           O  
ATOM   2207  CB  MET A 484     -10.043   0.209 -43.884  1.00 64.82           C  
ATOM   2208  CG  MET A 484      -8.860  -0.732 -44.082  1.00 64.74           C  
ATOM   2209  SD  MET A 484      -7.254   0.076 -44.079  1.00 64.51           S  
ATOM   2210  CE  MET A 484      -6.974   0.293 -42.326  1.00 64.65           C  
ATOM   2211  N   TRP A 485     -13.062   0.754 -42.822  1.00 64.76           N  
ATOM   2212  CA  TRP A 485     -14.123   1.731 -42.597  1.00 64.71           C  
ATOM   2213  C   TRP A 485     -13.530   3.126 -42.452  1.00 64.76           C  
ATOM   2214  O   TRP A 485     -12.407   3.281 -41.970  1.00 64.75           O  
ATOM   2215  CB  TRP A 485     -14.921   1.388 -41.339  1.00 64.68           C  
ATOM   2216  CG  TRP A 485     -15.393  -0.034 -41.248  1.00 64.47           C  
ATOM   2217  CD1 TRP A 485     -14.748  -1.072 -40.641  1.00 64.34           C  
ATOM   2218  CD2 TRP A 485     -16.620  -0.567 -41.759  1.00 64.28           C  
ATOM   2219  NE1 TRP A 485     -15.493  -2.221 -40.749  1.00 64.23           N  
ATOM   2220  CE2 TRP A 485     -16.647  -1.940 -41.430  1.00 64.22           C  
ATOM   2221  CE3 TRP A 485     -17.698  -0.020 -42.467  1.00 64.24           C  
ATOM   2222  CZ2 TRP A 485     -17.710  -2.775 -41.784  1.00 64.19           C  
ATOM   2223  CZ3 TRP A 485     -18.755  -0.851 -42.820  1.00 64.22           C  
ATOM   2224  CH2 TRP A 485     -18.751  -2.214 -42.478  1.00 64.21           C  
ATOM   2225  N   GLN A 486     -14.290   4.137 -42.861  1.00 64.81           N  
ATOM   2226  CA  GLN A 486     -13.845   5.522 -42.765  1.00 64.89           C  
ATOM   2227  C   GLN A 486     -14.486   6.222 -41.568  1.00 64.94           C  
ATOM   2228  O   GLN A 486     -15.661   6.000 -41.268  1.00 64.94           O  
ATOM   2229  CB  GLN A 486     -14.162   6.277 -44.059  1.00 64.90           C  
ATOM   2230  CG  GLN A 486     -13.387   7.584 -44.225  1.00 64.94           C  
ATOM   2231  CD  GLN A 486     -13.783   8.363 -45.467  1.00 64.95           C  
ATOM   2232  OE1 GLN A 486     -13.960   7.796 -46.547  1.00 64.95           O  
ATOM   2233  NE2 GLN A 486     -13.912   9.677 -45.320  1.00 64.93           N  
ATOM   2234  N   ILE A 487     -13.703   7.060 -40.890  1.00 65.01           N  
ATOM   2235  CA  ILE A 487     -14.188   7.846 -39.753  1.00 65.09           C  
ATOM   2236  C   ILE A 487     -14.644   9.227 -40.216  1.00 65.17           C  
ATOM   2237  O   ILE A 487     -13.975   9.869 -41.030  1.00 65.19           O  
ATOM   2238  CB  ILE A 487     -13.106   8.013 -38.650  1.00 65.08           C  
ATOM   2239  CG1 ILE A 487     -12.524   6.662 -38.232  1.00 65.08           C  
ATOM   2240  CG2 ILE A 487     -13.668   8.734 -37.427  1.00 65.06           C  
ATOM   2241  CD1 ILE A 487     -11.193   6.355 -38.863  1.00 65.12           C  
ATOM   2242  N   SER A 488     -15.785   9.673 -39.692  1.00 65.27           N  
ATOM   2243  CA  SER A 488     -16.311  11.009 -39.973  1.00 65.36           C  
ATOM   2244  C   SER A 488     -15.482  12.086 -39.271  1.00 65.39           C  
ATOM   2245  O   SER A 488     -15.199  11.982 -38.074  1.00 65.40           O  
ATOM   2246  CB  SER A 488     -17.784  11.108 -39.559  1.00 65.37           C  
ATOM   2247  OG  SER A 488     -17.968  10.731 -38.204  1.00 65.43           O  
ATOM   2248  N   GLY A 489     -15.091  13.110 -40.030  1.00 65.42           N  
ATOM   2249  CA  GLY A 489     -14.264  14.203 -39.514  1.00 65.44           C  
ATOM   2250  C   GLY A 489     -15.044  15.226 -38.709  1.00 65.43           C  
ATOM   2251  O   GLY A 489     -14.508  15.847 -37.789  1.00 65.40           O  
ATOM   2252  N   PHE A 497     -14.430   4.735 -27.206  1.00 65.98           N  
ATOM   2253  CA  PHE A 497     -15.079   5.176 -28.439  1.00 65.99           C  
ATOM   2254  C   PHE A 497     -16.189   4.211 -28.870  1.00 65.95           C  
ATOM   2255  O   PHE A 497     -16.463   3.227 -28.176  1.00 66.00           O  
ATOM   2256  CB  PHE A 497     -14.041   5.370 -29.552  1.00 66.01           C  
ATOM   2257  CG  PHE A 497     -12.905   6.279 -29.167  1.00 66.14           C  
ATOM   2258  CD1 PHE A 497     -13.092   7.661 -29.094  1.00 66.24           C  
ATOM   2259  CD2 PHE A 497     -11.650   5.756 -28.868  1.00 66.24           C  
ATOM   2260  CE1 PHE A 497     -12.041   8.509 -28.731  1.00 66.30           C  
ATOM   2261  CE2 PHE A 497     -10.592   6.596 -28.504  1.00 66.33           C  
ATOM   2262  CZ  PHE A 497     -10.789   7.975 -28.436  1.00 66.29           C  
ATOM   2263  N   ASN A 498     -16.825   4.499 -30.007  1.00 65.86           N  
ATOM   2264  CA  ASN A 498     -17.990   3.736 -30.474  1.00 65.74           C  
ATOM   2265  C   ASN A 498     -17.703   2.277 -30.825  1.00 65.65           C  
ATOM   2266  O   ASN A 498     -16.577   1.921 -31.182  1.00 65.60           O  
ATOM   2267  CB  ASN A 498     -18.698   4.445 -31.638  1.00 65.77           C  
ATOM   2268  CG  ASN A 498     -17.756   4.820 -32.768  1.00 65.76           C  
ATOM   2269  OD1 ASN A 498     -16.587   4.433 -32.783  1.00 65.85           O  
ATOM   2270  ND2 ASN A 498     -18.269   5.585 -33.726  1.00 65.71           N  
ATOM   2271  N   ALA A 499     -18.740   1.448 -30.717  1.00 65.57           N  
ATOM   2272  CA  ALA A 499     -18.627   0.003 -30.914  1.00 65.50           C  
ATOM   2273  C   ALA A 499     -18.300  -0.376 -32.354  1.00 65.45           C  
ATOM   2274  O   ALA A 499     -17.783  -1.464 -32.607  1.00 65.45           O  
ATOM   2275  CB  ALA A 499     -19.897  -0.691 -30.459  1.00 65.49           C  
ATOM   2276  N   ASP A 500     -18.595   0.527 -33.287  1.00 65.39           N  
ATOM   2277  CA  ASP A 500     -18.296   0.322 -34.703  1.00 65.33           C  
ATOM   2278  C   ASP A 500     -16.798   0.149 -34.970  1.00 65.31           C  
ATOM   2279  O   ASP A 500     -16.405  -0.355 -36.022  1.00 65.31           O  
ATOM   2280  CB  ASP A 500     -18.855   1.477 -35.538  1.00 65.33           C  
ATOM   2281  CG  ASP A 500     -20.373   1.559 -35.487  1.00 65.33           C  
ATOM   2282  OD1 ASP A 500     -21.021   0.581 -35.050  1.00 65.30           O  
ATOM   2283  OD2 ASP A 500     -20.920   2.608 -35.892  1.00 65.32           O  
ATOM   2284  N   LYS A 501     -15.974   0.564 -34.009  1.00 65.28           N  
ATOM   2285  CA  LYS A 501     -14.522   0.412 -34.093  1.00 65.25           C  
ATOM   2286  C   LYS A 501     -14.051  -0.938 -33.554  1.00 65.29           C  
ATOM   2287  O   LYS A 501     -12.848  -1.206 -33.503  1.00 65.32           O  
ATOM   2288  CB  LYS A 501     -13.814   1.549 -33.348  1.00 65.22           C  
ATOM   2289  CG  LYS A 501     -13.811   2.882 -34.087  1.00 65.15           C  
ATOM   2290  CD  LYS A 501     -13.043   3.962 -33.325  1.00 64.98           C  
ATOM   2291  CE  LYS A 501     -11.571   4.025 -33.722  1.00 64.83           C  
ATOM   2292  NZ  LYS A 501     -10.782   2.851 -33.254  1.00 64.66           N  
ATOM   2293  N   LEU A 502     -15.001  -1.781 -33.156  1.00 65.30           N  
ATOM   2294  CA  LEU A 502     -14.692  -3.097 -32.596  1.00 65.32           C  
ATOM   2295  C   LEU A 502     -15.206  -4.240 -33.468  1.00 65.34           C  
ATOM   2296  O   LEU A 502     -14.970  -5.411 -33.160  1.00 65.34           O  
ATOM   2297  CB  LEU A 502     -15.268  -3.228 -31.181  1.00 65.33           C  
ATOM   2298  CG  LEU A 502     -14.750  -2.311 -30.069  1.00 65.36           C  
ATOM   2299  CD1 LEU A 502     -15.735  -2.309 -28.912  1.00 65.37           C  
ATOM   2300  CD2 LEU A 502     -13.356  -2.716 -29.593  1.00 65.40           C  
ATOM   2301  N   THR A 503     -15.896  -3.895 -34.555  1.00 65.39           N  
ATOM   2302  CA  THR A 503     -16.551  -4.885 -35.416  1.00 65.44           C  
ATOM   2303  C   THR A 503     -15.563  -5.808 -36.132  1.00 65.47           C  
ATOM   2304  O   THR A 503     -14.441  -5.409 -36.440  1.00 65.46           O  
ATOM   2305  CB  THR A 503     -17.512  -4.222 -36.441  1.00 65.42           C  
ATOM   2306  OG1 THR A 503     -18.218  -5.238 -37.164  1.00 65.47           O  
ATOM   2307  CG2 THR A 503     -16.755  -3.331 -37.424  1.00 65.42           C  
ATOM   2308  N   SER A 504     -15.990  -7.044 -36.378  1.00 65.55           N  
ATOM   2309  CA  SER A 504     -15.164  -8.026 -37.078  1.00 65.64           C  
ATOM   2310  C   SER A 504     -15.435  -8.028 -38.582  1.00 65.71           C  
ATOM   2311  O   SER A 504     -14.606  -8.489 -39.367  1.00 65.70           O  
ATOM   2312  CB  SER A 504     -15.373  -9.427 -36.493  1.00 65.64           C  
ATOM   2313  OG  SER A 504     -16.707  -9.872 -36.665  1.00 65.65           O  
ATOM   2314  N   ALA A 505     -16.596  -7.508 -38.972  1.00 65.81           N  
ATOM   2315  CA  ALA A 505     -17.000  -7.461 -40.373  1.00 65.93           C  
ATOM   2316  C   ALA A 505     -16.277  -6.354 -41.135  1.00 66.04           C  
ATOM   2317  O   ALA A 505     -15.896  -5.335 -40.555  1.00 66.03           O  
ATOM   2318  CB  ALA A 505     -18.507  -7.291 -40.483  1.00 65.92           C  
ATOM   2319  N   THR A 506     -16.094  -6.574 -42.437  1.00 66.20           N  
ATOM   2320  CA  THR A 506     -15.426  -5.617 -43.325  1.00 66.35           C  
ATOM   2321  C   THR A 506     -16.434  -4.819 -44.154  1.00 66.48           C  
ATOM   2322  O   THR A 506     -17.618  -5.158 -44.198  1.00 66.48           O  
ATOM   2323  CB  THR A 506     -14.428  -6.323 -44.272  1.00 66.33           C  
ATOM   2324  OG1 THR A 506     -15.090  -7.393 -44.960  1.00 66.42           O  
ATOM   2325  CG2 THR A 506     -13.250  -6.884 -43.491  1.00 66.30           C  
ATOM   2326  N   ASN A 507     -15.957  -3.759 -44.803  1.00 66.67           N  
ATOM   2327  CA  ASN A 507     -16.801  -2.878 -45.606  1.00 66.86           C  
ATOM   2328  C   ASN A 507     -17.281  -3.560 -46.892  1.00 67.02           C  
ATOM   2329  O   ASN A 507     -16.461  -3.987 -47.706  1.00 67.03           O  
ATOM   2330  CB  ASN A 507     -16.044  -1.586 -45.936  1.00 66.85           C  
ATOM   2331  CG  ASN A 507     -16.966  -0.419 -46.249  1.00 66.87           C  
ATOM   2332  OD1 ASN A 507     -18.064  -0.594 -46.778  1.00 66.89           O  
ATOM   2333  ND2 ASN A 507     -16.512   0.788 -45.931  1.00 66.92           N  
ATOM   2334  N   PRO A 508     -18.612  -3.677 -47.070  1.00 67.18           N  
ATOM   2335  CA  PRO A 508     -19.189  -4.281 -48.277  1.00 67.32           C  
ATOM   2336  C   PRO A 508     -18.998  -3.441 -49.539  1.00 67.48           C  
ATOM   2337  O   PRO A 508     -19.173  -3.951 -50.646  1.00 67.52           O  
ATOM   2338  CB  PRO A 508     -20.682  -4.386 -47.939  1.00 67.31           C  
ATOM   2339  CG  PRO A 508     -20.745  -4.327 -46.456  1.00 67.28           C  
ATOM   2340  CD  PRO A 508     -19.651  -3.390 -46.068  1.00 67.20           C  
ATOM   2341  N   ASP A 509     -18.648  -2.168 -49.371  1.00 67.66           N  
ATOM   2342  CA  ASP A 509     -18.378  -1.281 -50.498  1.00 67.84           C  
ATOM   2343  C   ASP A 509     -16.955  -1.510 -51.010  1.00 67.97           C  
ATOM   2344  O   ASP A 509     -16.058  -0.694 -50.786  1.00 67.98           O  
ATOM   2345  CB  ASP A 509     -18.595   0.184 -50.090  1.00 67.86           C  
ATOM   2346  CG  ASP A 509     -18.574   1.143 -51.276  1.00 67.97           C  
ATOM   2347  OD1 ASP A 509     -18.202   2.318 -51.075  1.00 67.93           O  
ATOM   2348  OD2 ASP A 509     -18.928   0.734 -52.403  1.00 68.18           O  
ATOM   2349  N   LYS A 510     -16.766  -2.629 -51.708  1.00 68.15           N  
ATOM   2350  CA  LYS A 510     -15.444  -3.061 -52.175  1.00 68.33           C  
ATOM   2351  C   LYS A 510     -14.782  -2.099 -53.165  1.00 68.45           C  
ATOM   2352  O   LYS A 510     -13.588  -2.222 -53.452  1.00 68.47           O  
ATOM   2353  CB  LYS A 510     -15.522  -4.469 -52.780  1.00 68.31           C  
ATOM   2354  CG  LYS A 510     -15.249  -5.604 -51.793  1.00 68.36           C  
ATOM   2355  CD  LYS A 510     -16.481  -5.979 -50.975  1.00 68.49           C  
ATOM   2356  CE  LYS A 510     -16.169  -7.075 -49.961  1.00 68.47           C  
ATOM   2357  NZ  LYS A 510     -15.334  -6.590 -48.819  1.00 68.39           N  
ATOM   2358  N   GLU A 511     -15.556  -1.143 -53.671  1.00 68.61           N  
ATOM   2359  CA  GLU A 511     -15.065  -0.204 -54.671  1.00 68.78           C  
ATOM   2360  C   GLU A 511     -14.443   1.041 -54.046  1.00 68.90           C  
ATOM   2361  O   GLU A 511     -13.237   1.260 -54.160  1.00 68.93           O  
ATOM   2362  CB  GLU A 511     -16.181   0.183 -55.645  1.00 68.77           C  
ATOM   2363  CG  GLU A 511     -16.724  -0.977 -56.469  1.00 68.93           C  
ATOM   2364  CD  GLU A 511     -17.880  -0.579 -57.375  1.00 69.17           C  
ATOM   2365  OE1 GLU A 511     -18.119  -1.292 -58.371  1.00 69.29           O  
ATOM   2366  OE2 GLU A 511     -18.553   0.439 -57.099  1.00 69.31           O  
ATOM   2367  N   ASN A 512     -15.267   1.843 -53.375  1.00 69.07           N  
ATOM   2368  CA  ASN A 512     -14.849   3.165 -52.900  1.00 69.23           C  
ATOM   2369  C   ASN A 512     -14.025   3.158 -51.608  1.00 69.32           C  
ATOM   2370  O   ASN A 512     -13.336   4.135 -51.300  1.00 69.32           O  
ATOM   2371  CB  ASN A 512     -16.064   4.091 -52.756  1.00 69.23           C  
ATOM   2372  CG  ASN A 512     -16.851   4.242 -54.053  1.00 69.30           C  
ATOM   2373  OD1 ASN A 512     -16.764   3.409 -54.955  1.00 69.30           O  
ATOM   2374  ND2 ASN A 512     -17.631   5.310 -54.145  1.00 69.42           N  
ATOM   2375  N   SER A 513     -14.094   2.054 -50.866  1.00 69.43           N  
ATOM   2376  CA  SER A 513     -13.403   1.931 -49.582  1.00 69.55           C  
ATOM   2377  C   SER A 513     -11.912   1.659 -49.748  1.00 69.64           C  
ATOM   2378  O   SER A 513     -11.465   1.219 -50.810  1.00 69.67           O  
ATOM   2379  CB  SER A 513     -14.036   0.823 -48.738  1.00 69.55           C  
ATOM   2380  OG  SER A 513     -13.826  -0.447 -49.330  1.00 69.54           O  
ATOM   2381  N   MET A 514     -11.155   1.920 -48.683  1.00 69.76           N  
ATOM   2382  CA  MET A 514      -9.715   1.674 -48.648  1.00 69.87           C  
ATOM   2383  C   MET A 514      -9.405   0.191 -48.464  1.00 69.88           C  
ATOM   2384  O   MET A 514      -9.947  -0.462 -47.574  1.00 69.87           O  
ATOM   2385  CB  MET A 514      -9.068   2.500 -47.530  1.00 69.90           C  
ATOM   2386  CG  MET A 514      -7.651   2.078 -47.144  1.00 70.07           C  
ATOM   2387  SD  MET A 514      -6.366   2.582 -48.307  1.00 70.41           S  
ATOM   2388  CE  MET A 514      -6.253   4.337 -47.956  1.00 70.34           C  
ATOM   2389  N   SER A 515      -8.522  -0.324 -49.311  1.00 69.96           N  
ATOM   2390  CA  SER A 515      -8.106  -1.718 -49.250  1.00 70.08           C  
ATOM   2391  C   SER A 515      -6.778  -1.850 -48.509  1.00 70.13           C  
ATOM   2392  O   SER A 515      -5.998  -0.897 -48.450  1.00 70.14           O  
ATOM   2393  CB  SER A 515      -7.987  -2.295 -50.661  1.00 70.09           C  
ATOM   2394  OG  SER A 515      -9.153  -2.023 -51.421  1.00 70.13           O  
ATOM   2395  N   ILE A 516      -6.536  -3.030 -47.939  1.00 70.18           N  
ATOM   2396  CA  ILE A 516      -5.274  -3.332 -47.255  1.00 70.23           C  
ATOM   2397  C   ILE A 516      -4.922  -4.818 -47.359  1.00 70.26           C  
ATOM   2398  O   ILE A 516      -5.706  -5.684 -46.962  1.00 70.26           O  
ATOM   2399  CB  ILE A 516      -5.267  -2.848 -45.765  1.00 70.23           C  
ATOM   2400  CG1 ILE A 516      -3.906  -3.117 -45.108  1.00 70.20           C  
ATOM   2401  CG2 ILE A 516      -6.414  -3.475 -44.965  1.00 70.26           C  
ATOM   2402  CD1 ILE A 516      -3.627  -2.275 -43.876  1.00 70.15           C  
ATOM   2403  N   SER A 517      -3.741  -5.099 -47.904  1.00 70.30           N  
ATOM   2404  CA  SER A 517      -3.261  -6.469 -48.059  1.00 70.34           C  
ATOM   2405  C   SER A 517      -2.293  -6.828 -46.941  1.00 70.35           C  
ATOM   2406  O   SER A 517      -1.337  -6.095 -46.682  1.00 70.36           O  
ATOM   2407  CB  SER A 517      -2.587  -6.654 -49.420  1.00 70.37           C  
ATOM   2408  OG  SER A 517      -3.474  -6.330 -50.477  1.00 70.41           O  
ATOM   2409  N   ILE A 518      -2.555  -7.951 -46.277  1.00 70.37           N  
ATOM   2410  CA  ILE A 518      -1.719  -8.415 -45.166  1.00 70.42           C  
ATOM   2411  C   ILE A 518      -1.468  -9.921 -45.222  1.00 70.48           C  
ATOM   2412  O   ILE A 518      -2.286 -10.677 -45.754  1.00 70.48           O  
ATOM   2413  CB  ILE A 518      -2.299  -8.017 -43.772  1.00 70.41           C  
ATOM   2414  CG1 ILE A 518      -3.764  -8.446 -43.622  1.00 70.34           C  
ATOM   2415  CG2 ILE A 518      -2.150  -6.518 -43.524  1.00 70.43           C  
ATOM   2416  CD1 ILE A 518      -3.958  -9.746 -42.877  1.00 70.27           C  
ATOM   2417  N   LEU A 519      -0.338 -10.345 -44.662  1.00 70.54           N  
ATOM   2418  CA  LEU A 519       0.056 -11.753 -44.677  1.00 70.63           C  
ATOM   2419  C   LEU A 519       0.362 -12.281 -43.277  1.00 70.65           C  
ATOM   2420  O   LEU A 519       1.049 -11.626 -42.487  1.00 70.65           O  
ATOM   2421  CB  LEU A 519       1.262 -11.959 -45.608  1.00 70.66           C  
ATOM   2422  CG  LEU A 519       1.946 -13.332 -45.702  1.00 70.72           C  
ATOM   2423  CD1 LEU A 519       1.009 -14.411 -46.244  1.00 70.74           C  
ATOM   2424  CD2 LEU A 519       3.204 -13.237 -46.556  1.00 70.79           C  
ATOM   2425  N   LEU A 520      -0.160 -13.470 -42.985  1.00 70.69           N  
ATOM   2426  CA  LEU A 520       0.102 -14.155 -41.722  1.00 70.78           C  
ATOM   2427  C   LEU A 520       0.566 -15.587 -41.965  1.00 70.84           C  
ATOM   2428  O   LEU A 520      -0.048 -16.321 -42.745  1.00 70.88           O  
ATOM   2429  CB  LEU A 520      -1.148 -14.160 -40.831  1.00 70.77           C  
ATOM   2430  CG  LEU A 520      -1.430 -12.976 -39.900  1.00 70.73           C  
ATOM   2431  CD1 LEU A 520      -2.083 -11.825 -40.638  1.00 70.78           C  
ATOM   2432  CD2 LEU A 520      -2.321 -13.426 -38.760  1.00 70.61           C  
ATOM   2433  N   ASP A 521       1.654 -15.972 -41.298  1.00 70.90           N  
ATOM   2434  CA  ASP A 521       2.169 -17.341 -41.350  1.00 70.96           C  
ATOM   2435  C   ASP A 521       3.087 -17.625 -40.160  1.00 71.01           C  
ATOM   2436  O   ASP A 521       4.313 -17.496 -40.258  1.00 71.03           O  
ATOM   2437  CB  ASP A 521       2.899 -17.607 -42.674  1.00 70.96           C  
ATOM   2438  CG  ASP A 521       3.027 -19.094 -42.991  1.00 70.94           C  
ATOM   2439  OD1 ASP A 521       2.684 -19.939 -42.135  1.00 70.89           O  
ATOM   2440  OD2 ASP A 521       3.474 -19.418 -44.112  1.00 70.93           O  
ATOM   2441  N   ASN A 522       2.479 -18.012 -39.040  1.00 71.07           N  
ATOM   2442  CA  ASN A 522       3.211 -18.330 -37.814  1.00 71.11           C  
ATOM   2443  C   ASN A 522       2.741 -19.641 -37.188  1.00 71.09           C  
ATOM   2444  O   ASN A 522       2.679 -20.674 -37.857  1.00 71.08           O  
ATOM   2445  CB  ASN A 522       3.089 -17.188 -36.795  1.00 71.13           C  
ATOM   2446  CG  ASN A 522       3.823 -15.920 -37.229  1.00 71.23           C  
ATOM   2447  OD1 ASN A 522       3.288 -14.814 -37.120  1.00 71.29           O  
ATOM   2448  ND2 ASN A 522       5.053 -16.076 -37.715  1.00 71.39           N  
ATOM   2449  N   HIS A 525      -5.221 -24.806 -33.683  1.00137.73           N  
ATOM   2450  CA  HIS A 525      -3.763 -24.833 -33.697  1.00137.74           C  
ATOM   2451  C   HIS A 525      -3.183 -24.519 -32.307  1.00137.77           C  
ATOM   2452  O   HIS A 525      -2.452 -25.344 -31.754  1.00137.76           O  
ATOM   2453  CB  HIS A 525      -3.213 -23.895 -34.779  1.00137.73           C  
ATOM   2454  CG  HIS A 525      -1.743 -24.040 -35.018  1.00137.69           C  
ATOM   2455  ND1 HIS A 525      -0.797 -23.399 -34.248  1.00137.65           N  
ATOM   2456  CD2 HIS A 525      -1.057 -24.746 -35.947  1.00137.62           C  
ATOM   2457  CE1 HIS A 525       0.409 -23.708 -34.689  1.00137.63           C  
ATOM   2458  NE2 HIS A 525       0.279 -24.523 -35.719  1.00137.61           N  
ATOM   2459  N   PRO A 526      -3.499 -23.333 -31.738  1.00137.79           N  
ATOM   2460  CA  PRO A 526      -3.120 -23.110 -30.346  1.00137.82           C  
ATOM   2461  C   PRO A 526      -4.265 -23.454 -29.387  1.00137.84           C  
ATOM   2462  O   PRO A 526      -5.236 -24.100 -29.795  1.00137.84           O  
ATOM   2463  CB  PRO A 526      -2.801 -21.612 -30.309  1.00137.82           C  
ATOM   2464  CG  PRO A 526      -3.626 -21.010 -31.410  1.00137.82           C  
ATOM   2465  CD  PRO A 526      -4.077 -22.115 -32.337  1.00137.80           C  
ATOM   2466  N   ILE A 527      -4.141 -23.019 -28.130  1.00137.86           N  
ATOM   2467  CA  ILE A 527      -5.107 -23.315 -27.055  1.00137.87           C  
ATOM   2468  C   ILE A 527      -5.392 -24.823 -26.961  1.00137.88           C  
ATOM   2469  O   ILE A 527      -6.541 -25.252 -26.820  1.00137.87           O  
ATOM   2470  CB  ILE A 527      -6.430 -22.489 -27.182  1.00137.87           C  
ATOM   2471  CG1 ILE A 527      -6.162 -21.091 -27.753  1.00137.84           C  
ATOM   2472  CG2 ILE A 527      -7.132 -22.383 -25.825  1.00137.87           C  
ATOM   2473  CD1 ILE A 527      -7.376 -20.438 -28.389  1.00137.83           C  
ATOM   2474  N   ALA A 528      -4.324 -25.615 -27.044  1.00137.90           N  
ATOM   2475  CA  ALA A 528      -4.418 -27.072 -27.028  1.00137.92           C  
ATOM   2476  C   ALA A 528      -3.446 -27.673 -26.018  1.00137.92           C  
ATOM   2477  O   ALA A 528      -3.841 -28.451 -25.148  1.00137.94           O  
ATOM   2478  CB  ALA A 528      -4.155 -27.635 -28.419  1.00137.92           C  
ATOM   2479  N   ARG A 544      -4.405 -21.033   2.112  1.00 82.28           N  
ATOM   2480  CA  ARG A 544      -5.071 -20.061   2.972  1.00 82.29           C  
ATOM   2481  C   ARG A 544      -4.563 -18.641   2.687  1.00 82.23           C  
ATOM   2482  O   ARG A 544      -4.978 -18.025   1.702  1.00 82.24           O  
ATOM   2483  CB  ARG A 544      -4.894 -20.438   4.451  1.00 82.33           C  
ATOM   2484  CG  ARG A 544      -5.644 -19.542   5.432  1.00 82.46           C  
ATOM   2485  CD  ARG A 544      -4.896 -19.449   6.751  1.00 82.78           C  
ATOM   2486  NE  ARG A 544      -4.936 -18.096   7.305  1.00 83.06           N  
ATOM   2487  CZ  ARG A 544      -4.213 -17.679   8.344  1.00 83.22           C  
ATOM   2488  NH1 ARG A 544      -3.378 -18.508   8.961  1.00 83.31           N  
ATOM   2489  NH2 ARG A 544      -4.324 -16.426   8.767  1.00 83.28           N  
ATOM   2490  N   ALA A 545      -3.659 -18.151   3.541  1.00 82.15           N  
ATOM   2491  CA  ALA A 545      -3.109 -16.787   3.481  1.00 82.08           C  
ATOM   2492  C   ALA A 545      -4.178 -15.683   3.473  1.00 82.03           C  
ATOM   2493  O   ALA A 545      -4.579 -15.189   2.413  1.00 82.06           O  
ATOM   2494  CB  ALA A 545      -2.129 -16.634   2.302  1.00 82.09           C  
ATOM   2495  N   GLU A 546      -4.632 -15.308   4.667  1.00 81.93           N  
ATOM   2496  CA  GLU A 546      -5.629 -14.250   4.831  1.00 81.83           C  
ATOM   2497  C   GLU A 546      -4.968 -12.872   4.863  1.00 81.74           C  
ATOM   2498  O   GLU A 546      -3.884 -12.708   5.426  1.00 81.73           O  
ATOM   2499  CB  GLU A 546      -6.451 -14.488   6.104  1.00 81.85           C  
ATOM   2500  CG  GLU A 546      -7.679 -13.582   6.276  1.00 81.89           C  
ATOM   2501  CD  GLU A 546      -8.785 -13.843   5.259  1.00 81.87           C  
ATOM   2502  OE1 GLU A 546      -8.952 -15.004   4.822  1.00 81.84           O  
ATOM   2503  OE2 GLU A 546      -9.498 -12.880   4.908  1.00 81.86           O  
ATOM   2504  N   MET A 547      -5.637 -11.890   4.259  1.00 81.64           N  
ATOM   2505  CA  MET A 547      -5.135 -10.516   4.167  1.00 81.57           C  
ATOM   2506  C   MET A 547      -4.899  -9.854   5.524  1.00 81.46           C  
ATOM   2507  O   MET A 547      -5.599 -10.154   6.492  1.00 81.46           O  
ATOM   2508  CB  MET A 547      -6.112  -9.640   3.382  1.00 81.60           C  
ATOM   2509  CG  MET A 547      -6.192  -9.905   1.896  1.00 81.79           C  
ATOM   2510  SD  MET A 547      -6.587  -8.370   1.035  1.00 82.12           S  
ATOM   2511  CE  MET A 547      -7.777  -8.947  -0.167  1.00 82.18           C  
ATOM   2512  N   PRO A 548      -3.911  -8.939   5.594  1.00 81.36           N  
ATOM   2513  CA  PRO A 548      -3.761  -8.079   6.765  1.00 81.27           C  
ATOM   2514  C   PRO A 548      -4.824  -6.987   6.762  1.00 81.16           C  
ATOM   2515  O   PRO A 548      -5.416  -6.706   5.718  1.00 81.16           O  
ATOM   2516  CB  PRO A 548      -2.373  -7.453   6.574  1.00 81.28           C  
ATOM   2517  CG  PRO A 548      -1.721  -8.230   5.489  1.00 81.34           C  
ATOM   2518  CD  PRO A 548      -2.823  -8.727   4.627  1.00 81.36           C  
ATOM   2519  N   ASN A 549      -5.046  -6.375   7.922  1.00 81.03           N  
ATOM   2520  CA  ASN A 549      -6.099  -5.375   8.102  1.00 80.90           C  
ATOM   2521  C   ASN A 549      -5.987  -4.154   7.178  1.00 80.78           C  
ATOM   2522  O   ASN A 549      -6.972  -3.761   6.551  1.00 80.78           O  
ATOM   2523  CB  ASN A 549      -6.169  -4.939   9.573  1.00 80.91           C  
ATOM   2524  CG  ASN A 549      -7.377  -4.068   9.875  1.00 80.96           C  
ATOM   2525  OD1 ASN A 549      -8.463  -4.273   9.329  1.00 81.00           O  
ATOM   2526  ND2 ASN A 549      -7.192  -3.093  10.759  1.00 81.06           N  
ATOM   2527  N   GLN A 550      -4.792  -3.571   7.091  1.00 80.61           N  
ATOM   2528  CA  GLN A 550      -4.577  -2.357   6.296  1.00 80.43           C  
ATOM   2529  C   GLN A 550      -4.610  -2.596   4.789  1.00 80.26           C  
ATOM   2530  O   GLN A 550      -5.005  -1.708   4.028  1.00 80.26           O  
ATOM   2531  CB  GLN A 550      -3.270  -1.661   6.696  1.00 80.45           C  
ATOM   2532  CG  GLN A 550      -3.432  -0.547   7.738  1.00 80.60           C  
ATOM   2533  CD  GLN A 550      -3.782  -1.045   9.141  1.00 80.81           C  
ATOM   2534  OE1 GLN A 550      -3.726  -2.240   9.431  1.00 80.96           O  
ATOM   2535  NE2 GLN A 550      -4.145  -0.114  10.018  1.00 80.80           N  
ATOM   2536  N   LEU A 551      -4.198  -3.789   4.366  1.00 80.04           N  
ATOM   2537  CA  LEU A 551      -4.202  -4.141   2.945  1.00 79.82           C  
ATOM   2538  C   LEU A 551      -5.604  -4.442   2.422  1.00 79.66           C  
ATOM   2539  O   LEU A 551      -5.947  -4.053   1.304  1.00 79.64           O  
ATOM   2540  CB  LEU A 551      -3.246  -5.303   2.655  1.00 79.81           C  
ATOM   2541  CG  LEU A 551      -1.760  -4.947   2.533  1.00 79.75           C  
ATOM   2542  CD1 LEU A 551      -0.917  -6.206   2.453  1.00 79.74           C  
ATOM   2543  CD2 LEU A 551      -1.493  -4.048   1.328  1.00 79.59           C  
ATOM   2544  N   ARG A 552      -6.409  -5.127   3.232  1.00 79.45           N  
ATOM   2545  CA  ARG A 552      -7.783  -5.452   2.850  1.00 79.28           C  
ATOM   2546  C   ARG A 552      -8.693  -4.224   2.875  1.00 79.10           C  
ATOM   2547  O   ARG A 552      -9.664  -4.151   2.121  1.00 79.09           O  
ATOM   2548  CB  ARG A 552      -8.354  -6.596   3.706  1.00 79.31           C  
ATOM   2549  CG  ARG A 552      -8.685  -6.251   5.158  1.00 79.40           C  
ATOM   2550  CD  ARG A 552      -9.025  -7.497   5.976  1.00 79.57           C  
ATOM   2551  NE  ARG A 552     -10.259  -8.148   5.532  1.00 79.69           N  
ATOM   2552  CZ  ARG A 552     -10.318  -9.312   4.885  1.00 79.72           C  
ATOM   2553  NH1 ARG A 552      -9.210  -9.982   4.597  1.00 79.72           N  
ATOM   2554  NH2 ARG A 552     -11.493  -9.812   4.527  1.00 79.75           N  
ATOM   2555  N   LYS A 553      -8.364  -3.262   3.734  1.00 78.86           N  
ATOM   2556  CA  LYS A 553      -9.114  -2.012   3.817  1.00 78.63           C  
ATOM   2557  C   LYS A 553      -8.848  -1.124   2.607  1.00 78.46           C  
ATOM   2558  O   LYS A 553      -9.706  -0.334   2.207  1.00 78.44           O  
ATOM   2559  CB  LYS A 553      -8.791  -1.269   5.114  1.00 78.66           C  
ATOM   2560  CG  LYS A 553      -9.476  -1.858   6.347  1.00 78.69           C  
ATOM   2561  CD  LYS A 553      -9.069  -1.147   7.635  1.00 78.76           C  
ATOM   2562  CE  LYS A 553      -9.888   0.120   7.866  1.00 78.82           C  
ATOM   2563  NZ  LYS A 553      -9.566   0.761   9.171  1.00 78.87           N  
ATOM   2564  N   GLN A 554      -7.655  -1.263   2.032  1.00 78.24           N  
ATOM   2565  CA  GLN A 554      -7.291  -0.558   0.807  1.00 78.04           C  
ATOM   2566  C   GLN A 554      -8.012  -1.165  -0.397  1.00 77.84           C  
ATOM   2567  O   GLN A 554      -8.400  -0.452  -1.325  1.00 77.81           O  
ATOM   2568  CB  GLN A 554      -5.777  -0.605   0.595  1.00 78.07           C  
ATOM   2569  CG  GLN A 554      -5.260   0.386  -0.445  1.00 78.20           C  
ATOM   2570  CD  GLN A 554      -3.785   0.207  -0.772  1.00 78.36           C  
ATOM   2571  OE1 GLN A 554      -3.344   0.538  -1.873  1.00 78.34           O  
ATOM   2572  NE2 GLN A 554      -3.015  -0.312   0.181  1.00 78.42           N  
ATOM   2573  N   LEU A 555      -8.185  -2.484  -0.366  1.00 77.59           N  
ATOM   2574  CA  LEU A 555      -8.862  -3.216  -1.432  1.00 77.35           C  
ATOM   2575  C   LEU A 555     -10.372  -2.994  -1.397  1.00 77.19           C  
ATOM   2576  O   LEU A 555     -11.008  -2.875  -2.444  1.00 77.18           O  
ATOM   2577  CB  LEU A 555      -8.526  -4.708  -1.342  1.00 77.35           C  
ATOM   2578  CG  LEU A 555      -8.942  -5.626  -2.495  1.00 77.28           C  
ATOM   2579  CD1 LEU A 555      -7.798  -6.544  -2.884  1.00 77.18           C  
ATOM   2580  CD2 LEU A 555     -10.185  -6.424  -2.142  1.00 77.26           C  
ATOM   2581  N   GLU A 556     -10.935  -2.937  -0.192  1.00 76.97           N  
ATOM   2582  CA  GLU A 556     -12.367  -2.695  -0.004  1.00 76.78           C  
ATOM   2583  C   GLU A 556     -12.810  -1.361  -0.602  1.00 76.60           C  
ATOM   2584  O   GLU A 556     -13.940  -1.232  -1.079  1.00 76.56           O  
ATOM   2585  CB  GLU A 556     -12.731  -2.748   1.481  1.00 76.82           C  
ATOM   2586  CG  GLU A 556     -12.927  -4.155   2.033  1.00 76.90           C  
ATOM   2587  CD  GLU A 556     -13.059  -4.188   3.550  1.00 77.06           C  
ATOM   2588  OE1 GLU A 556     -13.401  -3.147   4.154  1.00 77.07           O  
ATOM   2589  OE2 GLU A 556     -12.818  -5.262   4.141  1.00 77.14           O  
ATOM   2590  N   ALA A 557     -11.909  -0.381  -0.571  1.00 76.38           N  
ATOM   2591  CA  ALA A 557     -12.153   0.938  -1.148  1.00 76.16           C  
ATOM   2592  C   ALA A 557     -12.238   0.884  -2.673  1.00 76.00           C  
ATOM   2593  O   ALA A 557     -13.002   1.633  -3.282  1.00 75.99           O  
ATOM   2594  CB  ALA A 557     -11.070   1.913  -0.710  1.00 76.17           C  
ATOM   2595  N   ILE A 558     -11.452  -0.008  -3.274  1.00 75.78           N  
ATOM   2596  CA  ILE A 558     -11.408  -0.184  -4.729  1.00 75.54           C  
ATOM   2597  C   ILE A 558     -12.702  -0.806  -5.259  1.00 75.39           C  
ATOM   2598  O   ILE A 558     -13.152  -0.480  -6.356  1.00 75.37           O  
ATOM   2599  CB  ILE A 558     -10.182  -1.033  -5.163  1.00 75.54           C  
ATOM   2600  CG1 ILE A 558      -8.889  -0.417  -4.617  1.00 75.50           C  
ATOM   2601  CG2 ILE A 558     -10.112  -1.157  -6.685  1.00 75.54           C  
ATOM   2602  CD1 ILE A 558      -7.706  -1.363  -4.585  1.00 75.50           C  
ATOM   2603  N   ILE A 559     -13.296  -1.696  -4.471  1.00 75.20           N  
ATOM   2604  CA  ILE A 559     -14.570  -2.311  -4.831  1.00 75.03           C  
ATOM   2605  C   ILE A 559     -15.697  -1.288  -4.705  1.00 74.94           C  
ATOM   2606  O   ILE A 559     -16.640  -1.291  -5.498  1.00 74.93           O  
ATOM   2607  CB  ILE A 559     -14.881  -3.542  -3.950  1.00 75.02           C  
ATOM   2608  CG1 ILE A 559     -13.681  -4.494  -3.910  1.00 74.97           C  
ATOM   2609  CG2 ILE A 559     -16.131  -4.266  -4.457  1.00 74.99           C  
ATOM   2610  CD1 ILE A 559     -13.731  -5.510  -2.786  1.00 74.94           C  
ATOM   2611  N   ALA A 560     -15.579  -0.408  -3.714  1.00 74.82           N  
ATOM   2612  CA  ALA A 560     -16.595   0.603  -3.429  1.00 74.72           C  
ATOM   2613  C   ALA A 560     -16.657   1.726  -4.468  1.00 74.66           C  
ATOM   2614  O   ALA A 560     -17.645   2.461  -4.529  1.00 74.67           O  
ATOM   2615  CB  ALA A 560     -16.381   1.181  -2.037  1.00 74.73           C  
ATOM   2616  N   THR A 561     -15.605   1.857  -5.275  1.00 74.58           N  
ATOM   2617  CA  THR A 561     -15.535   2.904  -6.299  1.00 74.48           C  
ATOM   2618  C   THR A 561     -16.456   2.629  -7.485  1.00 74.40           C  
ATOM   2619  O   THR A 561     -16.822   1.481  -7.751  1.00 74.39           O  
ATOM   2620  CB  THR A 561     -14.095   3.116  -6.826  1.00 74.49           C  
ATOM   2621  OG1 THR A 561     -13.553   1.866  -7.269  1.00 74.51           O  
ATOM   2622  CG2 THR A 561     -13.200   3.716  -5.746  1.00 74.49           C  
ATOM   2623  N   ASP A 562     -16.813   3.699  -8.191  1.00 74.32           N  
ATOM   2624  CA  ASP A 562     -17.675   3.645  -9.372  1.00 74.22           C  
ATOM   2625  C   ASP A 562     -17.082   2.788 -10.495  1.00 74.13           C  
ATOM   2626  O   ASP A 562     -15.878   2.522 -10.498  1.00 74.12           O  
ATOM   2627  CB  ASP A 562     -17.936   5.066  -9.885  1.00 74.24           C  
ATOM   2628  CG  ASP A 562     -16.652   5.831 -10.164  1.00 74.27           C  
ATOM   2629  OD1 ASP A 562     -16.352   6.083 -11.351  1.00 74.28           O  
ATOM   2630  OD2 ASP A 562     -15.938   6.172  -9.197  1.00 74.35           O  
ATOM   2631  N   PRO A 563     -17.929   2.346 -11.447  1.00 74.05           N  
ATOM   2632  CA  PRO A 563     -17.470   1.589 -12.620  1.00 73.99           C  
ATOM   2633  C   PRO A 563     -16.513   2.361 -13.537  1.00 73.92           C  
ATOM   2634  O   PRO A 563     -15.769   1.745 -14.301  1.00 73.90           O  
ATOM   2635  CB  PRO A 563     -18.771   1.281 -13.366  1.00 73.99           C  
ATOM   2636  CG  PRO A 563     -19.816   1.298 -12.315  1.00 74.02           C  
ATOM   2637  CD  PRO A 563     -19.402   2.381 -11.371  1.00 74.04           C  
ATOM   2638  N   LEU A 564     -16.535   3.689 -13.457  1.00 73.86           N  
ATOM   2639  CA  LEU A 564     -15.682   4.536 -14.297  1.00 73.79           C  
ATOM   2640  C   LEU A 564     -14.427   5.033 -13.578  1.00 73.72           C  
ATOM   2641  O   LEU A 564     -13.913   6.114 -13.880  1.00 73.70           O  
ATOM   2642  CB  LEU A 564     -16.478   5.727 -14.841  1.00 73.82           C  
ATOM   2643  CG  LEU A 564     -17.571   5.468 -15.879  1.00 73.84           C  
ATOM   2644  CD1 LEU A 564     -18.317   6.761 -16.145  1.00 73.85           C  
ATOM   2645  CD2 LEU A 564     -16.995   4.896 -17.173  1.00 73.85           C  
ATOM   2646  N   ASN A 565     -13.941   4.243 -12.627  1.00 73.64           N  
ATOM   2647  CA  ASN A 565     -12.731   4.589 -11.896  1.00 73.58           C  
ATOM   2648  C   ASN A 565     -11.523   3.827 -12.436  1.00 73.54           C  
ATOM   2649  O   ASN A 565     -11.538   2.593 -12.482  1.00 73.54           O  
ATOM   2650  CB  ASN A 565     -12.909   4.334 -10.398  1.00 73.59           C  
ATOM   2651  CG  ASN A 565     -11.793   4.937  -9.568  1.00 73.57           C  
ATOM   2652  OD1 ASN A 565     -11.491   6.126  -9.678  1.00 73.55           O  
ATOM   2653  ND2 ASN A 565     -11.176   4.117  -8.727  1.00 73.60           N  
ATOM   2654  N   PRO A 566     -10.478   4.565 -12.858  1.00 73.50           N  
ATOM   2655  CA  PRO A 566      -9.266   3.953 -13.404  1.00 73.45           C  
ATOM   2656  C   PRO A 566      -8.499   3.145 -12.355  1.00 73.37           C  
ATOM   2657  O   PRO A 566      -8.464   3.523 -11.179  1.00 73.35           O  
ATOM   2658  CB  PRO A 566      -8.441   5.158 -13.870  1.00 73.47           C  
ATOM   2659  CG  PRO A 566      -8.951   6.307 -13.066  1.00 73.48           C  
ATOM   2660  CD  PRO A 566     -10.406   6.038 -12.872  1.00 73.49           C  
ATOM   2661  N   LEU A 567      -7.908   2.034 -12.787  1.00 73.28           N  
ATOM   2662  CA  LEU A 567      -7.114   1.186 -11.907  1.00 73.20           C  
ATOM   2663  C   LEU A 567      -5.627   1.480 -12.084  1.00 73.14           C  
ATOM   2664  O   LEU A 567      -5.076   1.323 -13.178  1.00 73.15           O  
ATOM   2665  CB  LEU A 567      -7.408  -0.297 -12.166  1.00 73.21           C  
ATOM   2666  CG  LEU A 567      -8.819  -0.821 -11.866  1.00 73.27           C  
ATOM   2667  CD1 LEU A 567      -9.112  -2.083 -12.667  1.00 73.29           C  
ATOM   2668  CD2 LEU A 567      -9.027  -1.068 -10.373  1.00 73.30           C  
ATOM   2669  N   THR A 568      -4.995   1.924 -11.000  1.00 73.03           N  
ATOM   2670  CA  THR A 568      -3.560   2.207 -10.974  1.00 72.92           C  
ATOM   2671  C   THR A 568      -2.783   0.895 -11.029  1.00 72.82           C  
ATOM   2672  O   THR A 568      -3.291  -0.143 -10.609  1.00 72.81           O  
ATOM   2673  CB  THR A 568      -3.167   2.972  -9.683  1.00 72.93           C  
ATOM   2674  OG1 THR A 568      -4.141   3.984  -9.401  1.00 73.00           O  
ATOM   2675  CG2 THR A 568      -1.788   3.621  -9.818  1.00 72.94           C  
ATOM   2676  N   ALA A 569      -1.556   0.944 -11.544  1.00 72.70           N  
ATOM   2677  CA  ALA A 569      -0.671  -0.221 -11.564  1.00 72.59           C  
ATOM   2678  C   ALA A 569      -0.511  -0.838 -10.172  1.00 72.51           C  
ATOM   2679  O   ALA A 569      -0.262  -2.038 -10.042  1.00 72.51           O  
ATOM   2680  CB  ALA A 569       0.683   0.152 -12.141  1.00 72.60           C  
ATOM   2681  N   GLU A 570      -0.660  -0.005  -9.142  1.00 72.40           N  
ATOM   2682  CA  GLU A 570      -0.644  -0.453  -7.752  1.00 72.28           C  
ATOM   2683  C   GLU A 570      -1.928  -1.222  -7.425  1.00 72.18           C  
ATOM   2684  O   GLU A 570      -1.887  -2.259  -6.758  1.00 72.17           O  
ATOM   2685  CB  GLU A 570      -0.470   0.748  -6.814  1.00 72.29           C  
ATOM   2686  CG  GLU A 570       0.099   0.416  -5.431  1.00 72.32           C  
ATOM   2687  CD  GLU A 570      -0.963   0.026  -4.414  1.00 72.41           C  
ATOM   2688  OE1 GLU A 570      -0.640  -0.742  -3.483  1.00 72.40           O  
ATOM   2689  OE2 GLU A 570      -2.118   0.488  -4.539  1.00 72.50           O  
ATOM   2690  N   ASP A 571      -3.058  -0.708  -7.911  1.00 72.05           N  
ATOM   2691  CA  ASP A 571      -4.369  -1.325  -7.700  1.00 71.91           C  
ATOM   2692  C   ASP A 571      -4.524  -2.607  -8.511  1.00 71.82           C  
ATOM   2693  O   ASP A 571      -5.082  -3.588  -8.024  1.00 71.79           O  
ATOM   2694  CB  ASP A 571      -5.493  -0.350  -8.073  1.00 71.92           C  
ATOM   2695  CG  ASP A 571      -5.496   0.912  -7.220  1.00 71.90           C  
ATOM   2696  OD1 ASP A 571      -4.411   1.369  -6.797  1.00 71.91           O  
ATOM   2697  OD2 ASP A 571      -6.596   1.460  -6.988  1.00 71.86           O  
ATOM   2698  N   LYS A 572      -4.026  -2.583  -9.746  1.00 71.72           N  
ATOM   2699  CA  LYS A 572      -4.102  -3.722 -10.664  1.00 71.63           C  
ATOM   2700  C   LYS A 572      -3.476  -4.985 -10.077  1.00 71.54           C  
ATOM   2701  O   LYS A 572      -3.946  -6.095 -10.333  1.00 71.55           O  
ATOM   2702  CB  LYS A 572      -3.420  -3.382 -11.994  1.00 71.65           C  
ATOM   2703  CG  LYS A 572      -4.144  -2.344 -12.852  1.00 71.71           C  
ATOM   2704  CD  LYS A 572      -5.124  -2.987 -13.824  1.00 71.79           C  
ATOM   2705  CE  LYS A 572      -5.485  -2.036 -14.956  1.00 71.85           C  
ATOM   2706  NZ  LYS A 572      -6.322  -2.696 -15.997  1.00 71.93           N  
ATOM   2707  N   GLU A 573      -2.420  -4.803  -9.289  1.00 71.42           N  
ATOM   2708  CA  GLU A 573      -1.707  -5.917  -8.673  1.00 71.30           C  
ATOM   2709  C   GLU A 573      -2.409  -6.436  -7.424  1.00 71.23           C  
ATOM   2710  O   GLU A 573      -2.430  -7.643  -7.181  1.00 71.22           O  
ATOM   2711  CB  GLU A 573      -0.276  -5.509  -8.336  1.00 71.32           C  
ATOM   2712  CG  GLU A 573       0.574  -5.189  -9.553  1.00 71.30           C  
ATOM   2713  CD  GLU A 573       2.003  -4.833  -9.199  1.00 71.30           C  
ATOM   2714  OE1 GLU A 573       2.872  -4.941 -10.089  1.00 71.33           O  
ATOM   2715  OE2 GLU A 573       2.262  -4.445  -8.039  1.00 71.30           O  
ATOM   2716  N   LEU A 574      -2.976  -5.519  -6.639  1.00 71.12           N  
ATOM   2717  CA  LEU A 574      -3.693  -5.871  -5.410  1.00 71.00           C  
ATOM   2718  C   LEU A 574      -4.888  -6.778  -5.691  1.00 70.89           C  
ATOM   2719  O   LEU A 574      -5.073  -7.793  -5.013  1.00 70.89           O  
ATOM   2720  CB  LEU A 574      -4.145  -4.611  -4.658  1.00 71.02           C  
ATOM   2721  CG  LEU A 574      -3.094  -3.784  -3.909  1.00 71.06           C  
ATOM   2722  CD1 LEU A 574      -3.668  -2.438  -3.499  1.00 71.05           C  
ATOM   2723  CD2 LEU A 574      -2.559  -4.527  -2.692  1.00 71.13           C  
ATOM   2724  N   LEU A 575      -5.679  -6.413  -6.700  1.00 70.77           N  
ATOM   2725  CA  LEU A 575      -6.840  -7.199  -7.120  1.00 70.65           C  
ATOM   2726  C   LEU A 575      -6.441  -8.611  -7.541  1.00 70.58           C  
ATOM   2727  O   LEU A 575      -7.126  -9.582  -7.210  1.00 70.56           O  
ATOM   2728  CB  LEU A 575      -7.588  -6.497  -8.265  1.00 70.65           C  
ATOM   2729  CG  LEU A 575      -8.696  -5.460  -8.013  1.00 70.59           C  
ATOM   2730  CD1 LEU A 575      -9.929  -6.095  -7.380  1.00 70.50           C  
ATOM   2731  CD2 LEU A 575      -8.217  -4.269  -7.190  1.00 70.58           C  
ATOM   2732  N   TRP A 576      -5.321  -8.714  -8.256  1.00 70.48           N  
ATOM   2733  CA  TRP A 576      -4.839  -9.994  -8.766  1.00 70.39           C  
ATOM   2734  C   TRP A 576      -4.166 -10.843  -7.691  1.00 70.34           C  
ATOM   2735  O   TRP A 576      -4.529 -11.999  -7.496  1.00 70.31           O  
ATOM   2736  CB  TRP A 576      -3.900  -9.791  -9.960  1.00 70.38           C  
ATOM   2737  CG  TRP A 576      -3.304 -11.072 -10.465  1.00 70.34           C  
ATOM   2738  CD1 TRP A 576      -2.010 -11.482 -10.328  1.00 70.34           C  
ATOM   2739  CD2 TRP A 576      -3.984 -12.119 -11.169  1.00 70.28           C  
ATOM   2740  NE1 TRP A 576      -1.838 -12.714 -10.909  1.00 70.27           N  
ATOM   2741  CE2 TRP A 576      -3.034 -13.129 -11.433  1.00 70.24           C  
ATOM   2742  CE3 TRP A 576      -5.303 -12.300 -11.606  1.00 70.24           C  
ATOM   2743  CZ2 TRP A 576      -3.358 -14.303 -12.113  1.00 70.26           C  
ATOM   2744  CZ3 TRP A 576      -5.625 -13.468 -12.281  1.00 70.26           C  
ATOM   2745  CH2 TRP A 576      -4.656 -14.455 -12.529  1.00 70.29           C  
ATOM   2746  N   HIS A 577      -3.191 -10.268  -6.992  1.00 70.30           N  
ATOM   2747  CA  HIS A 577      -2.422 -11.010  -5.993  1.00 70.28           C  
ATOM   2748  C   HIS A 577      -3.307 -11.721  -4.970  1.00 70.24           C  
ATOM   2749  O   HIS A 577      -2.973 -12.812  -4.505  1.00 70.23           O  
ATOM   2750  CB  HIS A 577      -1.425 -10.093  -5.285  1.00 70.28           C  
ATOM   2751  CG  HIS A 577      -0.465 -10.821  -4.399  1.00 70.37           C  
ATOM   2752  ND1 HIS A 577      -0.579 -10.827  -3.026  1.00 70.48           N  
ATOM   2753  CD2 HIS A 577       0.618 -11.580  -4.690  1.00 70.44           C  
ATOM   2754  CE1 HIS A 577       0.397 -11.551  -2.508  1.00 70.52           C  
ATOM   2755  NE2 HIS A 577       1.138 -12.020  -3.496  1.00 70.48           N  
ATOM   2756  N   PHE A 578      -4.434 -11.099  -4.633  1.00 70.22           N  
ATOM   2757  CA  PHE A 578      -5.396 -11.680  -3.701  1.00 70.19           C  
ATOM   2758  C   PHE A 578      -6.656 -12.155  -4.429  1.00 70.20           C  
ATOM   2759  O   PHE A 578      -7.779 -11.834  -4.032  1.00 70.22           O  
ATOM   2760  CB  PHE A 578      -5.748 -10.676  -2.602  1.00 70.15           C  
ATOM   2761  CG  PHE A 578      -4.556 -10.149  -1.857  1.00 70.05           C  
ATOM   2762  CD1 PHE A 578      -4.060  -8.877  -2.127  1.00 70.04           C  
ATOM   2763  CD2 PHE A 578      -3.927 -10.922  -0.885  1.00 69.92           C  
ATOM   2764  CE1 PHE A 578      -2.957  -8.380  -1.440  1.00 69.99           C  
ATOM   2765  CE2 PHE A 578      -2.823 -10.436  -0.195  1.00 69.91           C  
ATOM   2766  CZ  PHE A 578      -2.338  -9.161  -0.473  1.00 69.94           C  
ATOM   2767  N   ARG A 579      -6.444 -12.925  -5.494  1.00 70.20           N  
ATOM   2768  CA  ARG A 579      -7.512 -13.496  -6.315  1.00 70.19           C  
ATOM   2769  C   ARG A 579      -8.660 -14.079  -5.496  1.00 70.14           C  
ATOM   2770  O   ARG A 579      -9.825 -13.763  -5.737  1.00 70.13           O  
ATOM   2771  CB  ARG A 579      -6.934 -14.589  -7.216  1.00 70.22           C  
ATOM   2772  CG  ARG A 579      -6.322 -14.091  -8.514  1.00 70.39           C  
ATOM   2773  CD  ARG A 579      -5.051 -14.858  -8.865  1.00 70.57           C  
ATOM   2774  NE  ARG A 579      -5.272 -16.297  -8.987  1.00 70.75           N  
ATOM   2775  CZ  ARG A 579      -4.301 -17.203  -9.054  1.00 70.88           C  
ATOM   2776  NH1 ARG A 579      -3.028 -16.827  -9.008  1.00 70.89           N  
ATOM   2777  NH2 ARG A 579      -4.604 -18.490  -9.162  1.00 70.98           N  
ATOM   2778  N   TYR A 580      -8.310 -14.919  -4.524  1.00 70.12           N  
ATOM   2779  CA  TYR A 580      -9.281 -15.704  -3.761  1.00 70.10           C  
ATOM   2780  C   TYR A 580     -10.148 -14.859  -2.834  1.00 70.01           C  
ATOM   2781  O   TYR A 580     -11.342 -15.121  -2.693  1.00 70.01           O  
ATOM   2782  CB  TYR A 580      -8.575 -16.811  -2.970  1.00 70.13           C  
ATOM   2783  CG  TYR A 580      -7.787 -17.774  -3.834  1.00 70.35           C  
ATOM   2784  CD1 TYR A 580      -6.424 -17.576  -4.069  1.00 70.48           C  
ATOM   2785  CD2 TYR A 580      -8.404 -18.884  -4.417  1.00 70.55           C  
ATOM   2786  CE1 TYR A 580      -5.693 -18.459  -4.864  1.00 70.65           C  
ATOM   2787  CE2 TYR A 580      -7.682 -19.775  -5.214  1.00 70.70           C  
ATOM   2788  CZ  TYR A 580      -6.328 -19.556  -5.432  1.00 70.77           C  
ATOM   2789  OH  TYR A 580      -5.610 -20.432  -6.217  1.00 70.87           O  
ATOM   2790  N   GLU A 581      -9.547 -13.850  -2.209  1.00 69.91           N  
ATOM   2791  CA  GLU A 581     -10.286 -12.950  -1.327  1.00 69.83           C  
ATOM   2792  C   GLU A 581     -11.075 -11.923  -2.136  1.00 69.74           C  
ATOM   2793  O   GLU A 581     -12.099 -11.415  -1.678  1.00 69.72           O  
ATOM   2794  CB  GLU A 581      -9.344 -12.260  -0.337  1.00 69.83           C  
ATOM   2795  CG  GLU A 581     -10.039 -11.668   0.898  1.00 69.90           C  
ATOM   2796  CD  GLU A 581     -10.714 -12.718   1.776  1.00 70.02           C  
ATOM   2797  OE1 GLU A 581     -10.098 -13.775   2.039  1.00 69.97           O  
ATOM   2798  OE2 GLU A 581     -11.862 -12.479   2.207  1.00 70.08           O  
ATOM   2799  N   SER A 582     -10.589 -11.632  -3.340  1.00 69.66           N  
ATOM   2800  CA  SER A 582     -11.279 -10.737  -4.268  1.00 69.56           C  
ATOM   2801  C   SER A 582     -12.482 -11.424  -4.909  1.00 69.49           C  
ATOM   2802  O   SER A 582     -13.420 -10.759  -5.351  1.00 69.49           O  
ATOM   2803  CB  SER A 582     -10.321 -10.246  -5.356  1.00 69.57           C  
ATOM   2804  OG  SER A 582      -9.179  -9.623  -4.794  1.00 69.58           O  
ATOM   2805  N   LEU A 583     -12.443 -12.755  -4.955  1.00 69.39           N  
ATOM   2806  CA  LEU A 583     -13.517 -13.567  -5.527  1.00 69.32           C  
ATOM   2807  C   LEU A 583     -14.782 -13.527  -4.667  1.00 69.25           C  
ATOM   2808  O   LEU A 583     -15.895 -13.639  -5.185  1.00 69.26           O  
ATOM   2809  CB  LEU A 583     -13.037 -15.015  -5.705  1.00 69.33           C  
ATOM   2810  CG  LEU A 583     -13.884 -16.065  -6.438  1.00 69.36           C  
ATOM   2811  CD1 LEU A 583     -12.983 -17.125  -7.043  1.00 69.41           C  
ATOM   2812  CD2 LEU A 583     -14.928 -16.720  -5.530  1.00 69.44           C  
ATOM   2813  N   LYS A 584     -14.600 -13.358  -3.359  1.00 69.15           N  
ATOM   2814  CA  LYS A 584     -15.705 -13.379  -2.396  1.00 69.05           C  
ATOM   2815  C   LYS A 584     -16.605 -12.134  -2.446  1.00 68.95           C  
ATOM   2816  O   LYS A 584     -17.471 -11.950  -1.586  1.00 68.93           O  
ATOM   2817  CB  LYS A 584     -15.165 -13.604  -0.978  1.00 69.07           C  
ATOM   2818  CG  LYS A 584     -14.636 -15.012  -0.742  1.00 69.13           C  
ATOM   2819  CD  LYS A 584     -13.956 -15.148   0.611  1.00 69.30           C  
ATOM   2820  CE  LYS A 584     -13.360 -16.541   0.777  1.00 69.41           C  
ATOM   2821  NZ  LYS A 584     -12.668 -16.720   2.083  1.00 69.46           N  
ATOM   2822  N   HIS A 585     -16.400 -11.293  -3.458  1.00 68.81           N  
ATOM   2823  CA  HIS A 585     -17.221 -10.104  -3.662  1.00 68.70           C  
ATOM   2824  C   HIS A 585     -17.747 -10.065  -5.090  1.00 68.60           C  
ATOM   2825  O   HIS A 585     -16.968  -9.858  -6.024  1.00 68.61           O  
ATOM   2826  CB  HIS A 585     -16.415  -8.836  -3.389  1.00 68.72           C  
ATOM   2827  CG  HIS A 585     -15.707  -8.838  -2.074  1.00 68.75           C  
ATOM   2828  ND1 HIS A 585     -16.271  -8.329  -0.925  1.00 68.84           N  
ATOM   2829  CD2 HIS A 585     -14.478  -9.284  -1.726  1.00 68.86           C  
ATOM   2830  CE1 HIS A 585     -15.419  -8.461   0.076  1.00 68.92           C  
ATOM   2831  NE2 HIS A 585     -14.324  -9.040  -0.383  1.00 68.98           N  
ATOM   2832  N   PRO A 586     -19.069 -10.258  -5.268  1.00 68.48           N  
ATOM   2833  CA  PRO A 586     -19.684 -10.213  -6.597  1.00 68.38           C  
ATOM   2834  C   PRO A 586     -19.431  -8.884  -7.306  1.00 68.25           C  
ATOM   2835  O   PRO A 586     -19.176  -8.866  -8.511  1.00 68.21           O  
ATOM   2836  CB  PRO A 586     -21.178 -10.384  -6.299  1.00 68.39           C  
ATOM   2837  CG  PRO A 586     -21.222 -11.102  -5.005  1.00 68.43           C  
ATOM   2838  CD  PRO A 586     -20.057 -10.577  -4.223  1.00 68.48           C  
ATOM   2839  N   LYS A 587     -19.477  -7.792  -6.548  1.00 68.11           N  
ATOM   2840  CA  LYS A 587     -19.340  -6.448  -7.098  1.00 67.99           C  
ATOM   2841  C   LYS A 587     -17.885  -6.096  -7.428  1.00 67.89           C  
ATOM   2842  O   LYS A 587     -17.599  -4.997  -7.913  1.00 67.89           O  
ATOM   2843  CB  LYS A 587     -19.947  -5.428  -6.129  1.00 68.02           C  
ATOM   2844  CG  LYS A 587     -20.672  -4.270  -6.803  1.00 68.06           C  
ATOM   2845  CD  LYS A 587     -21.538  -3.508  -5.805  1.00 68.09           C  
ATOM   2846  CE  LYS A 587     -22.334  -2.391  -6.474  1.00 68.17           C  
ATOM   2847  NZ  LYS A 587     -23.466  -2.895  -7.308  1.00 68.17           N  
ATOM   2848  N   ALA A 588     -16.977  -7.037  -7.178  1.00 67.76           N  
ATOM   2849  CA  ALA A 588     -15.550  -6.822  -7.411  1.00 67.64           C  
ATOM   2850  C   ALA A 588     -15.044  -7.468  -8.701  1.00 67.57           C  
ATOM   2851  O   ALA A 588     -13.916  -7.206  -9.126  1.00 67.57           O  
ATOM   2852  CB  ALA A 588     -14.741  -7.315  -6.221  1.00 67.64           C  
ATOM   2853  N   TYR A 589     -15.879  -8.303  -9.316  1.00 67.46           N  
ATOM   2854  CA  TYR A 589     -15.513  -9.027 -10.541  1.00 67.35           C  
ATOM   2855  C   TYR A 589     -15.081  -8.142 -11.731  1.00 67.27           C  
ATOM   2856  O   TYR A 589     -14.061  -8.433 -12.360  1.00 67.27           O  
ATOM   2857  CB  TYR A 589     -16.621 -10.009 -10.948  1.00 67.34           C  
ATOM   2858  CG  TYR A 589     -16.650 -11.283 -10.129  1.00 67.36           C  
ATOM   2859  CD1 TYR A 589     -17.086 -11.277  -8.808  1.00 67.41           C  
ATOM   2860  CD2 TYR A 589     -16.248 -12.498 -10.679  1.00 67.41           C  
ATOM   2861  CE1 TYR A 589     -17.115 -12.445  -8.048  1.00 67.46           C  
ATOM   2862  CE2 TYR A 589     -16.274 -13.675  -9.928  1.00 67.41           C  
ATOM   2863  CZ  TYR A 589     -16.709 -13.639  -8.613  1.00 67.42           C  
ATOM   2864  OH  TYR A 589     -16.741 -14.790  -7.860  1.00 67.42           O  
ATOM   2865  N   PRO A 590     -15.839  -7.063 -12.041  1.00 67.16           N  
ATOM   2866  CA  PRO A 590     -15.403  -6.176 -13.124  1.00 67.10           C  
ATOM   2867  C   PRO A 590     -14.028  -5.552 -12.881  1.00 67.06           C  
ATOM   2868  O   PRO A 590     -13.238  -5.428 -13.817  1.00 67.04           O  
ATOM   2869  CB  PRO A 590     -16.483  -5.094 -13.144  1.00 67.08           C  
ATOM   2870  CG  PRO A 590     -17.679  -5.764 -12.609  1.00 67.09           C  
ATOM   2871  CD  PRO A 590     -17.163  -6.662 -11.531  1.00 67.15           C  
ATOM   2872  N   LYS A 591     -13.749  -5.175 -11.635  1.00 67.04           N  
ATOM   2873  CA  LYS A 591     -12.453  -4.602 -11.264  1.00 67.03           C  
ATOM   2874  C   LYS A 591     -11.366  -5.675 -11.154  1.00 67.00           C  
ATOM   2875  O   LYS A 591     -10.173  -5.365 -11.182  1.00 67.00           O  
ATOM   2876  CB  LYS A 591     -12.561  -3.818  -9.948  1.00 67.06           C  
ATOM   2877  CG  LYS A 591     -13.508  -2.618  -9.986  1.00 67.10           C  
ATOM   2878  CD  LYS A 591     -12.845  -1.375 -10.576  1.00 67.22           C  
ATOM   2879  CE  LYS A 591     -13.853  -0.251 -10.799  1.00 67.24           C  
ATOM   2880  NZ  LYS A 591     -14.461   0.250  -9.530  1.00 67.24           N  
ATOM   2881  N   LEU A 592     -11.787  -6.931 -11.029  1.00 66.97           N  
ATOM   2882  CA  LEU A 592     -10.866  -8.060 -10.947  1.00 66.97           C  
ATOM   2883  C   LEU A 592     -10.368  -8.479 -12.330  1.00 67.01           C  
ATOM   2884  O   LEU A 592      -9.163  -8.612 -12.543  1.00 66.98           O  
ATOM   2885  CB  LEU A 592     -11.529  -9.246 -10.234  1.00 66.96           C  
ATOM   2886  CG  LEU A 592     -10.765 -10.572 -10.130  1.00 66.86           C  
ATOM   2887  CD1 LEU A 592      -9.644 -10.488  -9.105  1.00 66.78           C  
ATOM   2888  CD2 LEU A 592     -11.712 -11.711  -9.790  1.00 66.76           C  
ATOM   2889  N   PHE A 593     -11.300  -8.682 -13.260  1.00 67.07           N  
ATOM   2890  CA  PHE A 593     -10.968  -9.150 -14.608  1.00 67.13           C  
ATOM   2891  C   PHE A 593     -10.274  -8.091 -15.463  1.00 67.16           C  
ATOM   2892  O   PHE A 593      -9.584  -8.423 -16.429  1.00 67.18           O  
ATOM   2893  CB  PHE A 593     -12.213  -9.673 -15.330  1.00 67.14           C  
ATOM   2894  CG  PHE A 593     -12.833 -10.879 -14.683  1.00 67.24           C  
ATOM   2895  CD1 PHE A 593     -14.132 -10.826 -14.194  1.00 67.33           C  
ATOM   2896  CD2 PHE A 593     -12.122 -12.070 -14.563  1.00 67.29           C  
ATOM   2897  CE1 PHE A 593     -14.715 -11.936 -13.597  1.00 67.40           C  
ATOM   2898  CE2 PHE A 593     -12.698 -13.188 -13.965  1.00 67.32           C  
ATOM   2899  CZ  PHE A 593     -13.997 -13.119 -13.480  1.00 67.40           C  
ATOM   2900  N   SER A 594     -10.471  -6.822 -15.111  1.00 67.18           N  
ATOM   2901  CA  SER A 594      -9.767  -5.721 -15.761  1.00 67.21           C  
ATOM   2902  C   SER A 594      -8.308  -5.698 -15.319  1.00 67.25           C  
ATOM   2903  O   SER A 594      -7.429  -5.273 -16.070  1.00 67.25           O  
ATOM   2904  CB  SER A 594     -10.436  -4.388 -15.435  1.00 67.20           C  
ATOM   2905  OG  SER A 594     -11.776  -4.371 -15.888  1.00 67.18           O  
ATOM   2906  N   SER A 595      -8.068  -6.170 -14.097  1.00 67.30           N  
ATOM   2907  CA  SER A 595      -6.725  -6.255 -13.526  1.00 67.38           C  
ATOM   2908  C   SER A 595      -5.923  -7.414 -14.110  1.00 67.42           C  
ATOM   2909  O   SER A 595      -4.697  -7.440 -14.005  1.00 67.42           O  
ATOM   2910  CB  SER A 595      -6.803  -6.397 -12.006  1.00 67.36           C  
ATOM   2911  OG  SER A 595      -7.558  -5.347 -11.432  1.00 67.42           O  
ATOM   2912  N   VAL A 596      -6.627  -8.367 -14.716  1.00 67.49           N  
ATOM   2913  CA  VAL A 596      -6.010  -9.545 -15.323  1.00 67.58           C  
ATOM   2914  C   VAL A 596      -5.290  -9.171 -16.617  1.00 67.66           C  
ATOM   2915  O   VAL A 596      -5.877  -8.549 -17.507  1.00 67.67           O  
ATOM   2916  CB  VAL A 596      -7.061 -10.656 -15.601  1.00 67.57           C  
ATOM   2917  CG1 VAL A 596      -6.445 -11.824 -16.364  1.00 67.57           C  
ATOM   2918  CG2 VAL A 596      -7.685 -11.143 -14.299  1.00 67.59           C  
ATOM   2919  N   LYS A 597      -4.014  -9.541 -16.702  1.00 67.75           N  
ATOM   2920  CA  LYS A 597      -3.225  -9.340 -17.913  1.00 67.83           C  
ATOM   2921  C   LYS A 597      -3.405 -10.548 -18.829  1.00 67.87           C  
ATOM   2922  O   LYS A 597      -2.853 -11.623 -18.579  1.00 67.85           O  
ATOM   2923  CB  LYS A 597      -1.748  -9.098 -17.577  1.00 67.83           C  
ATOM   2924  CG  LYS A 597      -1.492  -7.803 -16.797  1.00 67.89           C  
ATOM   2925  CD  LYS A 597      -0.006  -7.504 -16.634  1.00 68.08           C  
ATOM   2926  CE  LYS A 597       0.552  -6.728 -17.825  1.00 68.26           C  
ATOM   2927  NZ  LYS A 597       1.991  -6.386 -17.649  1.00 68.34           N  
ATOM   2928  N   TRP A 598      -4.191 -10.351 -19.885  1.00 67.94           N  
ATOM   2929  CA  TRP A 598      -4.639 -11.442 -20.750  1.00 68.01           C  
ATOM   2930  C   TRP A 598      -3.585 -11.927 -21.745  1.00 68.07           C  
ATOM   2931  O   TRP A 598      -3.765 -12.963 -22.389  1.00 68.11           O  
ATOM   2932  CB  TRP A 598      -5.925 -11.045 -21.480  1.00 67.99           C  
ATOM   2933  CG  TRP A 598      -7.094 -10.837 -20.558  1.00 67.93           C  
ATOM   2934  CD1 TRP A 598      -7.573  -9.645 -20.100  1.00 67.90           C  
ATOM   2935  CD2 TRP A 598      -7.928 -11.851 -19.985  1.00 67.81           C  
ATOM   2936  NE1 TRP A 598      -8.654  -9.852 -19.277  1.00 67.82           N  
ATOM   2937  CE2 TRP A 598      -8.894 -11.197 -19.190  1.00 67.77           C  
ATOM   2938  CE3 TRP A 598      -7.955 -13.248 -20.066  1.00 67.85           C  
ATOM   2939  CZ2 TRP A 598      -9.875 -11.891 -18.481  1.00 67.80           C  
ATOM   2940  CZ3 TRP A 598      -8.931 -13.939 -19.359  1.00 67.83           C  
ATOM   2941  CH2 TRP A 598      -9.877 -13.258 -18.577  1.00 67.83           C  
ATOM   2942  N   GLY A 599      -2.486 -11.183 -21.856  1.00 68.13           N  
ATOM   2943  CA  GLY A 599      -1.383 -11.547 -22.745  1.00 68.20           C  
ATOM   2944  C   GLY A 599      -0.373 -12.498 -22.122  1.00 68.25           C  
ATOM   2945  O   GLY A 599       0.776 -12.565 -22.565  1.00 68.26           O  
ATOM   2946  N   GLN A 600      -0.804 -13.229 -21.095  1.00 68.30           N  
ATOM   2947  CA  GLN A 600       0.047 -14.186 -20.390  1.00 68.37           C  
ATOM   2948  C   GLN A 600      -0.641 -15.543 -20.326  1.00 68.41           C  
ATOM   2949  O   GLN A 600      -1.772 -15.646 -19.848  1.00 68.42           O  
ATOM   2950  CB  GLN A 600       0.359 -13.697 -18.968  1.00 68.38           C  
ATOM   2951  CG  GLN A 600       1.130 -12.377 -18.877  1.00 68.43           C  
ATOM   2952  CD  GLN A 600       2.606 -12.512 -19.219  1.00 68.55           C  
ATOM   2953  OE1 GLN A 600       3.125 -13.617 -19.388  1.00 68.59           O  
ATOM   2954  NE2 GLN A 600       3.290 -11.378 -19.318  1.00 68.65           N  
ATOM   2955  N   GLN A 601       0.046 -16.577 -20.806  1.00 68.44           N  
ATOM   2956  CA  GLN A 601      -0.498 -17.937 -20.835  1.00 68.46           C  
ATOM   2957  C   GLN A 601      -0.891 -18.435 -19.441  1.00 68.42           C  
ATOM   2958  O   GLN A 601      -1.998 -18.943 -19.253  1.00 68.39           O  
ATOM   2959  CB  GLN A 601       0.495 -18.901 -21.505  1.00 68.50           C  
ATOM   2960  CG  GLN A 601       0.088 -20.388 -21.505  1.00 68.66           C  
ATOM   2961  CD  GLN A 601      -1.073 -20.718 -22.444  1.00 68.85           C  
ATOM   2962  OE1 GLN A 601      -1.893 -21.588 -22.145  1.00 68.86           O  
ATOM   2963  NE2 GLN A 601      -1.137 -20.035 -23.584  1.00 68.95           N  
ATOM   2964  N   GLU A 602       0.012 -18.267 -18.474  1.00 68.41           N  
ATOM   2965  CA  GLU A 602      -0.195 -18.758 -17.108  1.00 68.41           C  
ATOM   2966  C   GLU A 602      -1.269 -17.987 -16.346  1.00 68.36           C  
ATOM   2967  O   GLU A 602      -2.094 -18.590 -15.655  1.00 68.36           O  
ATOM   2968  CB  GLU A 602       1.122 -18.759 -16.321  1.00 68.44           C  
ATOM   2969  CG  GLU A 602       1.967 -20.020 -16.499  1.00 68.57           C  
ATOM   2970  CD  GLU A 602       2.534 -20.175 -17.905  1.00 68.75           C  
ATOM   2971  OE1 GLU A 602       3.006 -19.168 -18.481  1.00 68.86           O  
ATOM   2972  OE2 GLU A 602       2.510 -21.311 -18.428  1.00 68.73           O  
ATOM   2973  N   ILE A 603      -1.252 -16.661 -16.478  1.00 68.29           N  
ATOM   2974  CA  ILE A 603      -2.222 -15.788 -15.810  1.00 68.22           C  
ATOM   2975  C   ILE A 603      -3.651 -16.100 -16.274  1.00 68.17           C  
ATOM   2976  O   ILE A 603      -4.564 -16.211 -15.451  1.00 68.13           O  
ATOM   2977  CB  ILE A 603      -1.858 -14.278 -15.979  1.00 68.21           C  
ATOM   2978  CG1 ILE A 603      -0.673 -13.913 -15.074  1.00 68.19           C  
ATOM   2979  CG2 ILE A 603      -3.049 -13.375 -15.667  1.00 68.20           C  
ATOM   2980  CD1 ILE A 603      -0.104 -12.515 -15.299  1.00 68.20           C  
ATOM   2981  N   VAL A 604      -3.826 -16.270 -17.584  1.00 68.11           N  
ATOM   2982  CA  VAL A 604      -5.115 -16.667 -18.157  1.00 68.06           C  
ATOM   2983  C   VAL A 604      -5.551 -18.032 -17.616  1.00 68.04           C  
ATOM   2984  O   VAL A 604      -6.705 -18.209 -17.223  1.00 68.03           O  
ATOM   2985  CB  VAL A 604      -5.075 -16.666 -19.711  1.00 68.04           C  
ATOM   2986  CG1 VAL A 604      -6.261 -17.421 -20.304  1.00 68.02           C  
ATOM   2987  CG2 VAL A 604      -5.043 -15.241 -20.238  1.00 68.02           C  
ATOM   2988  N   ALA A 605      -4.614 -18.977 -17.576  1.00 68.03           N  
ATOM   2989  CA  ALA A 605      -4.878 -20.328 -17.077  1.00 68.03           C  
ATOM   2990  C   ALA A 605      -5.300 -20.344 -15.607  1.00 68.02           C  
ATOM   2991  O   ALA A 605      -6.124 -21.167 -15.201  1.00 68.02           O  
ATOM   2992  CB  ALA A 605      -3.660 -21.216 -17.288  1.00 68.04           C  
ATOM   2993  N   LYS A 606      -4.730 -19.432 -14.821  1.00 68.00           N  
ATOM   2994  CA  LYS A 606      -5.047 -19.309 -13.397  1.00 67.97           C  
ATOM   2995  C   LYS A 606      -6.420 -18.682 -13.170  1.00 67.96           C  
ATOM   2996  O   LYS A 606      -7.084 -18.967 -12.168  1.00 67.91           O  
ATOM   2997  CB  LYS A 606      -3.960 -18.511 -12.671  1.00 67.97           C  
ATOM   2998  CG  LYS A 606      -2.667 -19.287 -12.481  1.00 68.00           C  
ATOM   2999  CD  LYS A 606      -1.602 -18.472 -11.777  1.00 68.01           C  
ATOM   3000  CE  LYS A 606      -0.367 -19.324 -11.526  1.00 68.11           C  
ATOM   3001  NZ  LYS A 606       0.688 -18.593 -10.771  1.00 68.20           N  
ATOM   3002  N   THR A 607      -6.836 -17.835 -14.111  1.00 67.97           N  
ATOM   3003  CA  THR A 607      -8.136 -17.169 -14.061  1.00 67.98           C  
ATOM   3004  C   THR A 607      -9.266 -18.173 -14.268  1.00 68.00           C  
ATOM   3005  O   THR A 607     -10.298 -18.098 -13.603  1.00 68.01           O  
ATOM   3006  CB  THR A 607      -8.241 -16.049 -15.122  1.00 67.97           C  
ATOM   3007  OG1 THR A 607      -7.044 -15.264 -15.117  1.00 67.96           O  
ATOM   3008  CG2 THR A 607      -9.432 -15.144 -14.841  1.00 67.96           C  
ATOM   3009  N   TYR A 608      -9.059 -19.111 -15.190  1.00 68.01           N  
ATOM   3010  CA  TYR A 608     -10.039 -20.157 -15.463  1.00 68.06           C  
ATOM   3011  C   TYR A 608     -10.173 -21.108 -14.278  1.00 68.08           C  
ATOM   3012  O   TYR A 608     -11.259 -21.627 -14.011  1.00 68.05           O  
ATOM   3013  CB  TYR A 608      -9.679 -20.908 -16.748  1.00 68.06           C  
ATOM   3014  CG  TYR A 608     -10.037 -20.149 -18.010  1.00 68.09           C  
ATOM   3015  CD1 TYR A 608     -11.091 -20.566 -18.820  1.00 68.14           C  
ATOM   3016  CD2 TYR A 608      -9.333 -19.005 -18.387  1.00 68.12           C  
ATOM   3017  CE1 TYR A 608     -11.427 -19.868 -19.977  1.00 68.22           C  
ATOM   3018  CE2 TYR A 608      -9.663 -18.299 -19.536  1.00 68.23           C  
ATOM   3019  CZ  TYR A 608     -10.710 -18.735 -20.327  1.00 68.30           C  
ATOM   3020  OH  TYR A 608     -11.037 -18.039 -21.467  1.00 68.48           O  
ATOM   3021  N   GLN A 609      -9.066 -21.310 -13.565  1.00 68.16           N  
ATOM   3022  CA  GLN A 609      -9.049 -22.087 -12.325  1.00 68.23           C  
ATOM   3023  C   GLN A 609      -9.776 -21.334 -11.216  1.00 68.22           C  
ATOM   3024  O   GLN A 609     -10.371 -21.945 -10.325  1.00 68.24           O  
ATOM   3025  CB  GLN A 609      -7.612 -22.388 -11.896  1.00 68.27           C  
ATOM   3026  CG  GLN A 609      -6.895 -23.416 -12.768  1.00 68.47           C  
ATOM   3027  CD  GLN A 609      -5.381 -23.405 -12.585  1.00 68.70           C  
ATOM   3028  OE1 GLN A 609      -4.864 -22.989 -11.544  1.00 68.75           O  
ATOM   3029  NE2 GLN A 609      -4.664 -23.867 -13.605  1.00 68.76           N  
ATOM   3030  N   LEU A 610      -9.713 -20.006 -11.280  1.00 68.23           N  
ATOM   3031  CA  LEU A 610     -10.455 -19.137 -10.375  1.00 68.24           C  
ATOM   3032  C   LEU A 610     -11.953 -19.213 -10.679  1.00 68.23           C  
ATOM   3033  O   LEU A 610     -12.781 -19.175  -9.766  1.00 68.24           O  
ATOM   3034  CB  LEU A 610      -9.935 -17.698 -10.493  1.00 68.25           C  
ATOM   3035  CG  LEU A 610     -10.577 -16.544  -9.715  1.00 68.30           C  
ATOM   3036  CD1 LEU A 610      -9.559 -15.454  -9.460  1.00 68.22           C  
ATOM   3037  CD2 LEU A 610     -11.795 -15.968 -10.439  1.00 68.38           C  
ATOM   3038  N   LEU A 611     -12.286 -19.327 -11.964  1.00 68.25           N  
ATOM   3039  CA  LEU A 611     -13.677 -19.390 -12.419  1.00 68.27           C  
ATOM   3040  C   LEU A 611     -14.351 -20.724 -12.107  1.00 68.29           C  
ATOM   3041  O   LEU A 611     -15.577 -20.799 -12.017  1.00 68.28           O  
ATOM   3042  CB  LEU A 611     -13.770 -19.100 -13.923  1.00 68.26           C  
ATOM   3043  CG  LEU A 611     -13.518 -17.670 -14.415  1.00 68.24           C  
ATOM   3044  CD1 LEU A 611     -13.402 -17.647 -15.932  1.00 68.21           C  
ATOM   3045  CD2 LEU A 611     -14.605 -16.710 -13.947  1.00 68.18           C  
ATOM   3046  N   ALA A 612     -13.547 -21.771 -11.943  1.00 68.33           N  
ATOM   3047  CA  ALA A 612     -14.059 -23.109 -11.640  1.00 68.36           C  
ATOM   3048  C   ALA A 612     -14.701 -23.192 -10.252  1.00 68.38           C  
ATOM   3049  O   ALA A 612     -15.551 -24.052 -10.006  1.00 68.39           O  
ATOM   3050  CB  ALA A 612     -12.953 -24.148 -11.784  1.00 68.36           C  
ATOM   3051  N   ARG A 613     -14.295 -22.293  -9.358  1.00 68.40           N  
ATOM   3052  CA  ARG A 613     -14.808 -22.265  -7.988  1.00 68.42           C  
ATOM   3053  C   ARG A 613     -15.717 -21.058  -7.734  1.00 68.39           C  
ATOM   3054  O   ARG A 613     -15.504 -20.282  -6.797  1.00 68.36           O  
ATOM   3055  CB  ARG A 613     -13.656 -22.337  -6.972  1.00 68.45           C  
ATOM   3056  CG  ARG A 613     -12.506 -21.362  -7.227  1.00 68.57           C  
ATOM   3057  CD  ARG A 613     -11.203 -21.861  -6.619  1.00 68.84           C  
ATOM   3058  NE  ARG A 613     -11.242 -21.882  -5.157  1.00 69.08           N  
ATOM   3059  CZ  ARG A 613     -10.268 -22.351  -4.381  1.00 69.21           C  
ATOM   3060  NH1 ARG A 613      -9.159 -22.852  -4.913  1.00 69.20           N  
ATOM   3061  NH2 ARG A 613     -10.405 -22.322  -3.062  1.00 69.30           N  
ATOM   3062  N   ARG A 614     -16.733 -20.913  -8.581  1.00 68.36           N  
ATOM   3063  CA  ARG A 614     -17.723 -19.847  -8.439  1.00 68.35           C  
ATOM   3064  C   ARG A 614     -18.797 -20.203  -7.410  1.00 68.27           C  
ATOM   3065  O   ARG A 614     -19.949 -20.481  -7.760  1.00 68.26           O  
ATOM   3066  CB  ARG A 614     -18.377 -19.541  -9.785  1.00 68.38           C  
ATOM   3067  CG  ARG A 614     -17.592 -18.609 -10.680  1.00 68.54           C  
ATOM   3068  CD  ARG A 614     -18.272 -18.487 -12.033  1.00 68.90           C  
ATOM   3069  NE  ARG A 614     -18.182 -19.724 -12.808  1.00 69.16           N  
ATOM   3070  CZ  ARG A 614     -18.969 -20.038 -13.834  1.00 69.30           C  
ATOM   3071  NH1 ARG A 614     -19.934 -19.212 -14.222  1.00 69.36           N  
ATOM   3072  NH2 ARG A 614     -18.796 -21.190 -14.469  1.00 69.42           N  
ATOM   3073  N   GLU A 615     -18.416 -20.192  -6.137  1.00 68.17           N  
ATOM   3074  CA  GLU A 615     -19.356 -20.495  -5.064  1.00 68.07           C  
ATOM   3075  C   GLU A 615     -20.220 -19.280  -4.744  1.00 67.97           C  
ATOM   3076  O   GLU A 615     -21.448 -19.353  -4.821  1.00 67.95           O  
ATOM   3077  CB  GLU A 615     -18.620 -20.993  -3.814  1.00 68.09           C  
ATOM   3078  CG  GLU A 615     -18.109 -22.431  -3.910  1.00 68.16           C  
ATOM   3079  CD  GLU A 615     -19.220 -23.473  -3.849  1.00 68.30           C  
ATOM   3080  OE1 GLU A 615     -20.257 -23.215  -3.198  1.00 68.34           O  
ATOM   3081  OE2 GLU A 615     -19.049 -24.558  -4.445  1.00 68.31           O  
ATOM   3082  N   VAL A 616     -19.569 -18.165  -4.411  1.00 67.84           N  
ATOM   3083  CA  VAL A 616     -20.255 -16.934  -4.013  1.00 67.71           C  
ATOM   3084  C   VAL A 616     -20.999 -16.308  -5.191  1.00 67.59           C  
ATOM   3085  O   VAL A 616     -22.133 -15.852  -5.035  1.00 67.59           O  
ATOM   3086  CB  VAL A 616     -19.273 -15.895  -3.396  1.00 67.73           C  
ATOM   3087  CG1 VAL A 616     -20.030 -14.699  -2.822  1.00 67.70           C  
ATOM   3088  CG2 VAL A 616     -18.417 -16.538  -2.312  1.00 67.78           C  
ATOM   3089  N   TRP A 617     -20.361 -16.308  -6.361  1.00 67.40           N  
ATOM   3090  CA  TRP A 617     -20.916 -15.685  -7.564  1.00 67.21           C  
ATOM   3091  C   TRP A 617     -22.240 -16.302  -8.012  1.00 67.03           C  
ATOM   3092  O   TRP A 617     -23.170 -15.582  -8.375  1.00 67.03           O  
ATOM   3093  CB  TRP A 617     -19.900 -15.724  -8.710  1.00 67.24           C  
ATOM   3094  CG  TRP A 617     -20.428 -15.180 -10.014  1.00 67.32           C  
ATOM   3095  CD1 TRP A 617     -20.801 -15.904 -11.111  1.00 67.38           C  
ATOM   3096  CD2 TRP A 617     -20.646 -13.802 -10.350  1.00 67.38           C  
ATOM   3097  NE1 TRP A 617     -21.233 -15.064 -12.110  1.00 67.38           N  
ATOM   3098  CE2 TRP A 617     -21.148 -13.769 -11.671  1.00 67.39           C  
ATOM   3099  CE3 TRP A 617     -20.464 -12.591  -9.665  1.00 67.40           C  
ATOM   3100  CZ2 TRP A 617     -21.472 -12.571 -12.322  1.00 67.41           C  
ATOM   3101  CZ3 TRP A 617     -20.786 -11.398 -10.314  1.00 67.42           C  
ATOM   3102  CH2 TRP A 617     -21.285 -11.401 -11.629  1.00 67.41           C  
ATOM   3103  N   ASP A 618     -22.318 -17.629  -7.977  1.00 66.80           N  
ATOM   3104  CA  ASP A 618     -23.496 -18.344  -8.463  1.00 66.57           C  
ATOM   3105  C   ASP A 618     -24.704 -18.218  -7.535  1.00 66.37           C  
ATOM   3106  O   ASP A 618     -25.844 -18.152  -8.000  1.00 66.34           O  
ATOM   3107  CB  ASP A 618     -23.156 -19.815  -8.720  1.00 66.60           C  
ATOM   3108  CG  ASP A 618     -22.157 -19.996  -9.857  1.00 66.65           C  
ATOM   3109  OD1 ASP A 618     -21.504 -19.005 -10.253  1.00 66.63           O  
ATOM   3110  OD2 ASP A 618     -22.020 -21.134 -10.354  1.00 66.81           O  
ATOM   3111  N   GLN A 619     -24.447 -18.175  -6.230  1.00 66.13           N  
ATOM   3112  CA  GLN A 619     -25.515 -18.123  -5.229  1.00 65.92           C  
ATOM   3113  C   GLN A 619     -25.850 -16.696  -4.790  1.00 65.72           C  
ATOM   3114  O   GLN A 619     -26.751 -16.486  -3.969  1.00 65.70           O  
ATOM   3115  CB  GLN A 619     -25.167 -19.000  -4.017  1.00 65.96           C  
ATOM   3116  CG  GLN A 619     -24.027 -18.473  -3.143  1.00 65.99           C  
ATOM   3117  CD  GLN A 619     -23.528 -19.498  -2.138  1.00 66.06           C  
ATOM   3118  OE1 GLN A 619     -24.305 -20.276  -1.582  1.00 66.09           O  
ATOM   3119  NE2 GLN A 619     -22.221 -19.498  -1.896  1.00 66.09           N  
ATOM   3120  N   SER A 620     -25.122 -15.727  -5.343  1.00 65.44           N  
ATOM   3121  CA  SER A 620     -25.330 -14.311  -5.035  1.00 65.17           C  
ATOM   3122  C   SER A 620     -26.638 -13.796  -5.624  1.00 64.93           C  
ATOM   3123  O   SER A 620     -27.114 -14.307  -6.642  1.00 64.91           O  
ATOM   3124  CB  SER A 620     -24.165 -13.468  -5.562  1.00 65.21           C  
ATOM   3125  OG  SER A 620     -24.113 -13.496  -6.979  1.00 65.25           O  
ATOM   3126  N   ALA A 621     -27.211 -12.784  -4.975  1.00 64.62           N  
ATOM   3127  CA  ALA A 621     -28.421 -12.138  -5.468  1.00 64.33           C  
ATOM   3128  C   ALA A 621     -28.118 -11.400  -6.763  1.00 64.12           C  
ATOM   3129  O   ALA A 621     -27.079 -10.744  -6.890  1.00 64.12           O  
ATOM   3130  CB  ALA A 621     -28.993 -11.189  -4.429  1.00 64.36           C  
ATOM   3131  N   LEU A 622     -29.034 -11.526  -7.718  1.00 63.81           N  
ATOM   3132  CA  LEU A 622     -28.870 -10.978  -9.061  1.00 63.49           C  
ATOM   3133  C   LEU A 622     -28.736  -9.451  -9.072  1.00 63.23           C  
ATOM   3134  O   LEU A 622     -29.676  -8.725  -8.735  1.00 63.22           O  
ATOM   3135  CB  LEU A 622     -30.030 -11.451  -9.948  1.00 63.51           C  
ATOM   3136  CG  LEU A 622     -30.331 -10.821 -11.311  1.00 63.52           C  
ATOM   3137  CD1 LEU A 622     -29.192 -11.015 -12.303  1.00 63.52           C  
ATOM   3138  CD2 LEU A 622     -31.621 -11.412 -11.846  1.00 63.55           C  
ATOM   3139  N   ASP A 623     -27.551  -8.981  -9.451  1.00 62.89           N  
ATOM   3140  CA  ASP A 623     -27.285  -7.555  -9.588  1.00 62.58           C  
ATOM   3141  C   ASP A 623     -27.119  -7.229 -11.071  1.00 62.35           C  
ATOM   3142  O   ASP A 623     -26.137  -7.635 -11.697  1.00 62.35           O  
ATOM   3143  CB  ASP A 623     -26.038  -7.165  -8.786  1.00 62.60           C  
ATOM   3144  CG  ASP A 623     -25.831  -5.659  -8.703  1.00 62.57           C  
ATOM   3145  OD1 ASP A 623     -26.724  -4.891  -9.122  1.00 62.53           O  
ATOM   3146  OD2 ASP A 623     -24.765  -5.240  -8.210  1.00 62.58           O  
ATOM   3147  N   VAL A 624     -28.088  -6.498 -11.621  1.00 62.01           N  
ATOM   3148  CA  VAL A 624     -28.174  -6.266 -13.066  1.00 61.66           C  
ATOM   3149  C   VAL A 624     -27.059  -5.363 -13.584  1.00 61.42           C  
ATOM   3150  O   VAL A 624     -26.424  -5.676 -14.593  1.00 61.41           O  
ATOM   3151  CB  VAL A 624     -29.547  -5.691 -13.489  1.00 61.66           C  
ATOM   3152  CG1 VAL A 624     -29.763  -5.883 -14.984  1.00 61.60           C  
ATOM   3153  CG2 VAL A 624     -30.676  -6.349 -12.707  1.00 61.66           C  
ATOM   3154  N   GLY A 625     -26.827  -4.249 -12.891  1.00 61.13           N  
ATOM   3155  CA  GLY A 625     -25.786  -3.293 -13.273  1.00 60.80           C  
ATOM   3156  C   GLY A 625     -24.395  -3.897 -13.237  1.00 60.56           C  
ATOM   3157  O   GLY A 625     -23.526  -3.534 -14.029  1.00 60.53           O  
ATOM   3158  N   LEU A 626     -24.202  -4.824 -12.305  1.00 60.32           N  
ATOM   3159  CA  LEU A 626     -22.966  -5.583 -12.169  1.00 60.04           C  
ATOM   3160  C   LEU A 626     -22.813  -6.551 -13.337  1.00 59.85           C  
ATOM   3161  O   LEU A 626     -21.730  -6.687 -13.903  1.00 59.85           O  
ATOM   3162  CB  LEU A 626     -23.007  -6.369 -10.862  1.00 60.04           C  
ATOM   3163  CG  LEU A 626     -21.752  -6.758 -10.085  1.00 59.99           C  
ATOM   3164  CD1 LEU A 626     -22.204  -7.536  -8.869  1.00 59.93           C  
ATOM   3165  CD2 LEU A 626     -20.783  -7.583 -10.909  1.00 60.09           C  
ATOM   3166  N   THR A 627     -23.908  -7.227 -13.678  1.00 59.61           N  
ATOM   3167  CA  THR A 627     -23.938  -8.191 -14.774  1.00 59.40           C  
ATOM   3168  C   THR A 627     -23.646  -7.511 -16.110  1.00 59.25           C  
ATOM   3169  O   THR A 627     -22.887  -8.035 -16.929  1.00 59.22           O  
ATOM   3170  CB  THR A 627     -25.303  -8.907 -14.835  1.00 59.41           C  
ATOM   3171  OG1 THR A 627     -25.615  -9.451 -13.547  1.00 59.47           O  
ATOM   3172  CG2 THR A 627     -25.285 -10.030 -15.854  1.00 59.40           C  
ATOM   3173  N   MET A 628     -24.248  -6.340 -16.311  1.00 59.07           N  
ATOM   3174  CA  MET A 628     -24.045  -5.540 -17.517  1.00 58.89           C  
ATOM   3175  C   MET A 628     -22.579  -5.148 -17.719  1.00 58.74           C  
ATOM   3176  O   MET A 628     -22.084  -5.156 -18.849  1.00 58.74           O  
ATOM   3177  CB  MET A 628     -24.924  -4.289 -17.479  1.00 58.93           C  
ATOM   3178  CG  MET A 628     -26.387  -4.534 -17.805  1.00 58.99           C  
ATOM   3179  SD  MET A 628     -26.677  -4.779 -19.566  1.00 59.19           S  
ATOM   3180  CE  MET A 628     -28.427  -4.409 -19.666  1.00 59.07           C  
ATOM   3181  N   GLN A 629     -21.895  -4.816 -16.623  1.00 58.51           N  
ATOM   3182  CA  GLN A 629     -20.489  -4.409 -16.663  1.00 58.28           C  
ATOM   3183  C   GLN A 629     -19.607  -5.449 -17.335  1.00 58.11           C  
ATOM   3184  O   GLN A 629     -18.697  -5.099 -18.082  1.00 58.11           O  
ATOM   3185  CB  GLN A 629     -19.956  -4.119 -15.259  1.00 58.30           C  
ATOM   3186  CG  GLN A 629     -20.391  -2.783 -14.686  1.00 58.35           C  
ATOM   3187  CD  GLN A 629     -19.652  -2.420 -13.413  1.00 58.42           C  
ATOM   3188  OE1 GLN A 629     -18.419  -2.405 -13.376  1.00 58.35           O  
ATOM   3189  NE2 GLN A 629     -20.405  -2.113 -12.360  1.00 58.46           N  
ATOM   3190  N   LEU A 630     -19.892  -6.723 -17.074  1.00 57.89           N  
ATOM   3191  CA  LEU A 630     -19.115  -7.825 -17.636  1.00 57.68           C  
ATOM   3192  C   LEU A 630     -19.522  -8.155 -19.078  1.00 57.53           C  
ATOM   3193  O   LEU A 630     -19.096  -9.169 -19.632  1.00 57.52           O  
ATOM   3194  CB  LEU A 630     -19.215  -9.066 -16.737  1.00 57.69           C  
ATOM   3195  CG  LEU A 630     -18.690  -8.964 -15.298  1.00 57.69           C  
ATOM   3196  CD1 LEU A 630     -19.169 -10.146 -14.474  1.00 57.68           C  
ATOM   3197  CD2 LEU A 630     -17.169  -8.861 -15.246  1.00 57.68           C  
ATOM   3198  N   LEU A 631     -20.334  -7.290 -19.683  1.00 57.34           N  
ATOM   3199  CA  LEU A 631     -20.785  -7.484 -21.062  1.00 57.15           C  
ATOM   3200  C   LEU A 631     -20.460  -6.300 -21.981  1.00 57.05           C  
ATOM   3201  O   LEU A 631     -20.866  -6.282 -23.146  1.00 57.03           O  
ATOM   3202  CB  LEU A 631     -22.287  -7.801 -21.100  1.00 57.13           C  
ATOM   3203  CG  LEU A 631     -22.757  -9.137 -20.510  1.00 57.01           C  
ATOM   3204  CD1 LEU A 631     -24.257  -9.124 -20.278  1.00 56.91           C  
ATOM   3205  CD2 LEU A 631     -22.370 -10.307 -21.399  1.00 56.93           C  
ATOM   3206  N   ASP A 632     -19.722  -5.321 -21.458  1.00 56.92           N  
ATOM   3207  CA  ASP A 632     -19.322  -4.149 -22.241  1.00 56.82           C  
ATOM   3208  C   ASP A 632     -18.045  -4.393 -23.055  1.00 56.77           C  
ATOM   3209  O   ASP A 632     -17.610  -5.537 -23.212  1.00 56.77           O  
ATOM   3210  CB  ASP A 632     -19.200  -2.898 -21.349  1.00 56.81           C  
ATOM   3211  CG  ASP A 632     -18.073  -2.994 -20.321  1.00 56.74           C  
ATOM   3212  OD1 ASP A 632     -17.151  -3.817 -20.485  1.00 56.80           O  
ATOM   3213  OD2 ASP A 632     -18.104  -2.224 -19.340  1.00 56.51           O  
ATOM   3214  N   CYS A 633     -17.457  -3.313 -23.565  1.00 56.71           N  
ATOM   3215  CA  CYS A 633     -16.258  -3.383 -24.404  1.00 56.64           C  
ATOM   3216  C   CYS A 633     -15.008  -3.807 -23.638  1.00 56.59           C  
ATOM   3217  O   CYS A 633     -14.092  -4.391 -24.217  1.00 56.57           O  
ATOM   3218  CB  CYS A 633     -16.011  -2.037 -25.088  1.00 56.64           C  
ATOM   3219  SG  CYS A 633     -15.772  -0.654 -23.948  1.00 56.71           S  
ATOM   3220  N   ASN A 634     -14.982  -3.517 -22.340  1.00 56.53           N  
ATOM   3221  CA  ASN A 634     -13.803  -3.752 -21.502  1.00 56.49           C  
ATOM   3222  C   ASN A 634     -13.435  -5.223 -21.318  1.00 56.47           C  
ATOM   3223  O   ASN A 634     -12.318  -5.539 -20.904  1.00 56.47           O  
ATOM   3224  CB  ASN A 634     -13.977  -3.081 -20.135  1.00 56.48           C  
ATOM   3225  CG  ASN A 634     -14.303  -1.605 -20.249  1.00 56.43           C  
ATOM   3226  OD1 ASN A 634     -15.309  -1.138 -19.713  1.00 56.44           O  
ATOM   3227  ND2 ASN A 634     -13.459  -0.864 -20.960  1.00 56.34           N  
ATOM   3228  N   PHE A 635     -14.374  -6.114 -21.627  1.00 56.45           N  
ATOM   3229  CA  PHE A 635     -14.153  -7.550 -21.476  1.00 56.43           C  
ATOM   3230  C   PHE A 635     -14.459  -8.286 -22.771  1.00 56.41           C  
ATOM   3231  O   PHE A 635     -15.556  -8.166 -23.322  1.00 56.41           O  
ATOM   3232  CB  PHE A 635     -14.989  -8.107 -20.319  1.00 56.43           C  
ATOM   3233  CG  PHE A 635     -14.839  -7.332 -19.040  1.00 56.41           C  
ATOM   3234  CD1 PHE A 635     -15.811  -6.419 -18.650  1.00 56.33           C  
ATOM   3235  CD2 PHE A 635     -13.716  -7.498 -18.237  1.00 56.43           C  
ATOM   3236  CE1 PHE A 635     -15.676  -5.692 -17.476  1.00 56.27           C  
ATOM   3237  CE2 PHE A 635     -13.573  -6.773 -17.060  1.00 56.40           C  
ATOM   3238  CZ  PHE A 635     -14.558  -5.869 -16.681  1.00 56.32           C  
ATOM   3239  N   SER A 636     -13.476  -9.042 -23.250  1.00 56.37           N  
ATOM   3240  CA  SER A 636     -13.596  -9.755 -24.517  1.00 56.33           C  
ATOM   3241  C   SER A 636     -13.442 -11.269 -24.352  1.00 56.30           C  
ATOM   3242  O   SER A 636     -13.658 -12.028 -25.301  1.00 56.29           O  
ATOM   3243  CB  SER A 636     -12.578  -9.214 -25.525  1.00 56.32           C  
ATOM   3244  OG  SER A 636     -12.797  -9.759 -26.815  1.00 56.35           O  
ATOM   3245  N   ASP A 637     -13.076 -11.700 -23.146  1.00 56.25           N  
ATOM   3246  CA  ASP A 637     -12.923 -13.122 -22.845  1.00 56.23           C  
ATOM   3247  C   ASP A 637     -14.277 -13.821 -22.854  1.00 56.19           C  
ATOM   3248  O   ASP A 637     -15.232 -13.342 -22.241  1.00 56.19           O  
ATOM   3249  CB  ASP A 637     -12.236 -13.319 -21.491  1.00 56.26           C  
ATOM   3250  CG  ASP A 637     -11.839 -14.767 -21.242  1.00 56.33           C  
ATOM   3251  OD1 ASP A 637     -12.336 -15.356 -20.258  1.00 56.40           O  
ATOM   3252  OD2 ASP A 637     -11.038 -15.318 -22.031  1.00 56.37           O  
ATOM   3253  N   GLU A 638     -14.345 -14.953 -23.552  1.00 56.16           N  
ATOM   3254  CA  GLU A 638     -15.587 -15.716 -23.702  1.00 56.14           C  
ATOM   3255  C   GLU A 638     -16.172 -16.195 -22.371  1.00 56.07           C  
ATOM   3256  O   GLU A 638     -17.392 -16.238 -22.210  1.00 56.05           O  
ATOM   3257  CB  GLU A 638     -15.394 -16.898 -24.665  1.00 56.17           C  
ATOM   3258  CG  GLU A 638     -14.234 -17.840 -24.317  1.00 56.42           C  
ATOM   3259  CD  GLU A 638     -14.186 -19.095 -25.184  1.00 56.76           C  
ATOM   3260  OE1 GLU A 638     -13.387 -20.002 -24.862  1.00 56.90           O  
ATOM   3261  OE2 GLU A 638     -14.936 -19.184 -26.183  1.00 56.82           O  
ATOM   3262  N   ASN A 639     -15.299 -16.537 -21.425  1.00 56.01           N  
ATOM   3263  CA  ASN A 639     -15.722 -17.056 -20.123  1.00 55.96           C  
ATOM   3264  C   ASN A 639     -16.121 -15.986 -19.112  1.00 55.85           C  
ATOM   3265  O   ASN A 639     -17.055 -16.184 -18.337  1.00 55.86           O  
ATOM   3266  CB  ASN A 639     -14.653 -17.980 -19.528  1.00 56.02           C  
ATOM   3267  CG  ASN A 639     -14.750 -19.404 -20.053  1.00 56.20           C  
ATOM   3268  OD1 ASN A 639     -15.029 -20.335 -19.297  1.00 56.35           O  
ATOM   3269  ND2 ASN A 639     -14.519 -19.580 -21.352  1.00 56.34           N  
ATOM   3270  N   VAL A 640     -15.408 -14.861 -19.122  1.00 55.72           N  
ATOM   3271  CA  VAL A 640     -15.731 -13.720 -18.257  1.00 55.60           C  
ATOM   3272  C   VAL A 640     -17.129 -13.183 -18.581  1.00 55.51           C  
ATOM   3273  O   VAL A 640     -17.891 -12.819 -17.682  1.00 55.51           O  
ATOM   3274  CB  VAL A 640     -14.667 -12.591 -18.371  1.00 55.61           C  
ATOM   3275  CG1 VAL A 640     -15.101 -11.332 -17.619  1.00 55.62           C  
ATOM   3276  CG2 VAL A 640     -13.327 -13.072 -17.851  1.00 55.56           C  
ATOM   3277  N   ARG A 641     -17.458 -13.152 -19.868  1.00 55.37           N  
ATOM   3278  CA  ARG A 641     -18.773 -12.722 -20.319  1.00 55.22           C  
ATOM   3279  C   ARG A 641     -19.824 -13.797 -20.057  1.00 55.18           C  
ATOM   3280  O   ARG A 641     -20.999 -13.486 -19.859  1.00 55.18           O  
ATOM   3281  CB  ARG A 641     -18.734 -12.350 -21.802  1.00 55.21           C  
ATOM   3282  CG  ARG A 641     -17.882 -11.125 -22.104  1.00 55.02           C  
ATOM   3283  CD  ARG A 641     -17.781 -10.863 -23.593  1.00 54.66           C  
ATOM   3284  NE  ARG A 641     -19.027 -10.344 -24.148  1.00 54.33           N  
ATOM   3285  CZ  ARG A 641     -19.301  -9.054 -24.315  1.00 54.16           C  
ATOM   3286  NH1 ARG A 641     -20.464  -8.693 -24.832  1.00 54.17           N  
ATOM   3287  NH2 ARG A 641     -18.419  -8.126 -23.968  1.00 54.10           N  
ATOM   3288  N   ALA A 642     -19.390 -15.057 -20.045  1.00 55.12           N  
ATOM   3289  CA  ALA A 642     -20.288 -16.190 -19.818  1.00 55.09           C  
ATOM   3290  C   ALA A 642     -20.849 -16.229 -18.395  1.00 55.05           C  
ATOM   3291  O   ALA A 642     -21.999 -16.627 -18.192  1.00 55.05           O  
ATOM   3292  CB  ALA A 642     -19.592 -17.502 -20.155  1.00 55.10           C  
ATOM   3293  N   ILE A 643     -20.042 -15.811 -17.420  1.00 54.99           N  
ATOM   3294  CA  ILE A 643     -20.476 -15.802 -16.021  1.00 54.95           C  
ATOM   3295  C   ILE A 643     -21.546 -14.740 -15.778  1.00 54.90           C  
ATOM   3296  O   ILE A 643     -22.342 -14.854 -14.843  1.00 54.93           O  
ATOM   3297  CB  ILE A 643     -19.298 -15.645 -15.012  1.00 54.98           C  
ATOM   3298  CG1 ILE A 643     -18.753 -14.212 -14.995  1.00 55.09           C  
ATOM   3299  CG2 ILE A 643     -18.196 -16.667 -15.300  1.00 54.98           C  
ATOM   3300  CD1 ILE A 643     -18.018 -13.837 -13.711  1.00 55.28           C  
ATOM   3301  N   ALA A 644     -21.559 -13.715 -16.628  1.00 54.83           N  
ATOM   3302  CA  ALA A 644     -22.589 -12.685 -16.590  1.00 54.76           C  
ATOM   3303  C   ALA A 644     -23.905 -13.245 -17.114  1.00 54.70           C  
ATOM   3304  O   ALA A 644     -24.934 -13.143 -16.444  1.00 54.68           O  
ATOM   3305  CB  ALA A 644     -22.160 -11.467 -17.396  1.00 54.77           C  
ATOM   3306  N   VAL A 645     -23.858 -13.859 -18.297  1.00 54.63           N  
ATOM   3307  CA  VAL A 645     -25.041 -14.447 -18.930  1.00 54.60           C  
ATOM   3308  C   VAL A 645     -25.756 -15.411 -17.979  1.00 54.58           C  
ATOM   3309  O   VAL A 645     -26.987 -15.493 -17.976  1.00 54.56           O  
ATOM   3310  CB  VAL A 645     -24.687 -15.151 -20.266  1.00 54.59           C  
ATOM   3311  CG1 VAL A 645     -25.940 -15.679 -20.957  1.00 54.60           C  
ATOM   3312  CG2 VAL A 645     -23.949 -14.197 -21.193  1.00 54.61           C  
ATOM   3313  N   GLN A 646     -24.975 -16.115 -17.161  1.00 54.57           N  
ATOM   3314  CA  GLN A 646     -25.507 -17.013 -16.137  1.00 54.56           C  
ATOM   3315  C   GLN A 646     -26.474 -16.292 -15.192  1.00 54.48           C  
ATOM   3316  O   GLN A 646     -27.515 -16.843 -14.830  1.00 54.49           O  
ATOM   3317  CB  GLN A 646     -24.365 -17.654 -15.346  1.00 54.61           C  
ATOM   3318  CG  GLN A 646     -24.807 -18.724 -14.356  1.00 54.87           C  
ATOM   3319  CD  GLN A 646     -23.722 -19.071 -13.354  1.00 55.21           C  
ATOM   3320  OE1 GLN A 646     -23.687 -18.526 -12.249  1.00 55.34           O  
ATOM   3321  NE2 GLN A 646     -22.821 -19.969 -13.741  1.00 55.25           N  
ATOM   3322  N   LYS A 647     -26.125 -15.067 -14.801  1.00 54.36           N  
ATOM   3323  CA  LYS A 647     -27.002 -14.244 -13.967  1.00 54.26           C  
ATOM   3324  C   LYS A 647     -28.246 -13.776 -14.718  1.00 54.13           C  
ATOM   3325  O   LYS A 647     -29.325 -13.667 -14.132  1.00 54.09           O  
ATOM   3326  CB  LYS A 647     -26.239 -13.053 -13.376  1.00 54.29           C  
ATOM   3327  CG  LYS A 647     -25.876 -13.188 -11.888  1.00 54.41           C  
ATOM   3328  CD  LYS A 647     -24.780 -14.226 -11.617  1.00 54.66           C  
ATOM   3329  CE  LYS A 647     -25.346 -15.625 -11.342  1.00 54.65           C  
ATOM   3330  NZ  LYS A 647     -26.186 -15.683 -10.107  1.00 54.60           N  
ATOM   3331  N   LEU A 648     -28.095 -13.523 -16.015  1.00 53.98           N  
ATOM   3332  CA  LEU A 648     -29.220 -13.110 -16.853  1.00 53.84           C  
ATOM   3333  C   LEU A 648     -30.275 -14.208 -16.970  1.00 53.73           C  
ATOM   3334  O   LEU A 648     -31.449 -13.918 -17.195  1.00 53.74           O  
ATOM   3335  CB  LEU A 648     -28.742 -12.679 -18.244  1.00 53.84           C  
ATOM   3336  CG  LEU A 648     -27.758 -11.510 -18.348  1.00 53.83           C  
ATOM   3337  CD1 LEU A 648     -27.236 -11.392 -19.767  1.00 53.85           C  
ATOM   3338  CD2 LEU A 648     -28.385 -10.200 -17.902  1.00 53.73           C  
ATOM   3339  N   GLU A 649     -29.850 -15.459 -16.801  1.00 53.58           N  
ATOM   3340  CA  GLU A 649     -30.751 -16.612 -16.860  1.00 53.42           C  
ATOM   3341  C   GLU A 649     -31.842 -16.561 -15.790  1.00 53.28           C  
ATOM   3342  O   GLU A 649     -32.955 -17.048 -16.005  1.00 53.25           O  
ATOM   3343  CB  GLU A 649     -29.963 -17.920 -16.735  1.00 53.44           C  
ATOM   3344  CG  GLU A 649     -28.941 -18.164 -17.846  1.00 53.59           C  
ATOM   3345  CD  GLU A 649     -29.572 -18.528 -19.187  1.00 53.82           C  
ATOM   3346  OE1 GLU A 649     -30.807 -18.735 -19.249  1.00 53.89           O  
ATOM   3347  OE2 GLU A 649     -28.822 -18.613 -20.185  1.00 53.88           O  
ATOM   3348  N   SER A 650     -31.516 -15.962 -14.645  1.00 53.12           N  
ATOM   3349  CA  SER A 650     -32.451 -15.862 -13.528  1.00 52.95           C  
ATOM   3350  C   SER A 650     -33.467 -14.732 -13.700  1.00 52.81           C  
ATOM   3351  O   SER A 650     -34.435 -14.645 -12.942  1.00 52.80           O  
ATOM   3352  CB  SER A 650     -31.699 -15.720 -12.201  1.00 52.96           C  
ATOM   3353  OG  SER A 650     -30.844 -14.594 -12.216  1.00 53.00           O  
ATOM   3354  N   LEU A 651     -33.246 -13.871 -14.692  1.00 52.65           N  
ATOM   3355  CA  LEU A 651     -34.192 -12.800 -15.010  1.00 52.49           C  
ATOM   3356  C   LEU A 651     -35.463 -13.372 -15.613  1.00 52.32           C  
ATOM   3357  O   LEU A 651     -35.410 -14.294 -16.431  1.00 52.28           O  
ATOM   3358  CB  LEU A 651     -33.585 -11.790 -15.988  1.00 52.53           C  
ATOM   3359  CG  LEU A 651     -32.481 -10.831 -15.532  1.00 52.60           C  
ATOM   3360  CD1 LEU A 651     -31.782 -10.239 -16.737  1.00 52.63           C  
ATOM   3361  CD2 LEU A 651     -33.024  -9.722 -14.643  1.00 52.65           C  
ATOM   3362  N   GLU A 652     -36.599 -12.820 -15.202  1.00 52.13           N  
ATOM   3363  CA  GLU A 652     -37.893 -13.223 -15.745  1.00 51.94           C  
ATOM   3364  C   GLU A 652     -38.267 -12.367 -16.956  1.00 51.78           C  
ATOM   3365  O   GLU A 652     -37.606 -11.367 -17.244  1.00 51.74           O  
ATOM   3366  CB  GLU A 652     -38.980 -13.157 -14.667  1.00 51.97           C  
ATOM   3367  CG  GLU A 652     -39.130 -11.795 -13.996  1.00 51.98           C  
ATOM   3368  CD  GLU A 652     -40.346 -11.712 -13.091  1.00 51.97           C  
ATOM   3369  OE1 GLU A 652     -40.352 -10.847 -12.189  1.00 51.97           O  
ATOM   3370  OE2 GLU A 652     -41.294 -12.506 -13.279  1.00 51.91           O  
ATOM   3371  N   ASP A 653     -39.330 -12.767 -17.650  1.00 51.61           N  
ATOM   3372  CA  ASP A 653     -39.780 -12.101 -18.876  1.00 51.44           C  
ATOM   3373  C   ASP A 653     -39.920 -10.583 -18.757  1.00 51.26           C  
ATOM   3374  O   ASP A 653     -39.456  -9.848 -19.633  1.00 51.27           O  
ATOM   3375  CB  ASP A 653     -41.094 -12.718 -19.371  1.00 51.49           C  
ATOM   3376  CG  ASP A 653     -40.898 -14.078 -20.024  1.00 51.61           C  
ATOM   3377  OD1 ASP A 653     -39.743 -14.551 -20.117  1.00 51.73           O  
ATOM   3378  OD2 ASP A 653     -41.909 -14.673 -20.451  1.00 51.80           O  
ATOM   3379  N   ASP A 654     -40.547 -10.123 -17.673  1.00 50.99           N  
ATOM   3380  CA  ASP A 654     -40.759  -8.690 -17.440  1.00 50.72           C  
ATOM   3381  C   ASP A 654     -39.449  -7.901 -17.358  1.00 50.52           C  
ATOM   3382  O   ASP A 654     -39.338  -6.811 -17.924  1.00 50.50           O  
ATOM   3383  CB  ASP A 654     -41.595  -8.467 -16.175  1.00 50.75           C  
ATOM   3384  CG  ASP A 654     -41.842  -6.992 -15.886  1.00 50.78           C  
ATOM   3385  OD1 ASP A 654     -42.109  -6.221 -16.835  1.00 50.80           O  
ATOM   3386  OD2 ASP A 654     -41.771  -6.604 -14.701  1.00 50.81           O  
ATOM   3387  N   ASP A 655     -38.471  -8.464 -16.650  1.00 50.23           N  
ATOM   3388  CA  ASP A 655     -37.142  -7.871 -16.518  1.00 49.95           C  
ATOM   3389  C   ASP A 655     -36.374  -7.863 -17.836  1.00 49.71           C  
ATOM   3390  O   ASP A 655     -35.618  -6.930 -18.110  1.00 49.72           O  
ATOM   3391  CB  ASP A 655     -36.326  -8.614 -15.459  1.00 50.00           C  
ATOM   3392  CG  ASP A 655     -36.557  -8.084 -14.058  1.00 50.05           C  
ATOM   3393  OD1 ASP A 655     -36.948  -6.905 -13.910  1.00 50.16           O  
ATOM   3394  OD2 ASP A 655     -36.337  -8.853 -13.099  1.00 50.10           O  
ATOM   3395  N   VAL A 656     -36.561  -8.907 -18.639  1.00 49.35           N  
ATOM   3396  CA  VAL A 656     -35.913  -9.000 -19.942  1.00 49.01           C  
ATOM   3397  C   VAL A 656     -36.379  -7.852 -20.838  1.00 48.76           C  
ATOM   3398  O   VAL A 656     -35.576  -7.264 -21.556  1.00 48.75           O  
ATOM   3399  CB  VAL A 656     -36.152 -10.381 -20.608  1.00 49.02           C  
ATOM   3400  CG1 VAL A 656     -35.681 -10.390 -22.058  1.00 48.96           C  
ATOM   3401  CG2 VAL A 656     -35.441 -11.472 -19.823  1.00 49.05           C  
ATOM   3402  N   LEU A 657     -37.665  -7.518 -20.757  1.00 48.44           N  
ATOM   3403  CA  LEU A 657     -38.244  -6.427 -21.544  1.00 48.16           C  
ATOM   3404  C   LEU A 657     -37.628  -5.061 -21.242  1.00 47.94           C  
ATOM   3405  O   LEU A 657     -37.513  -4.217 -22.136  1.00 47.94           O  
ATOM   3406  CB  LEU A 657     -39.759  -6.374 -21.346  1.00 48.19           C  
ATOM   3407  CG  LEU A 657     -40.551  -7.532 -21.952  1.00 48.18           C  
ATOM   3408  CD1 LEU A 657     -41.934  -7.597 -21.325  1.00 48.17           C  
ATOM   3409  CD2 LEU A 657     -40.633  -7.418 -23.476  1.00 48.12           C  
ATOM   3410  N   HIS A 658     -37.242  -4.852 -19.984  1.00 47.60           N  
ATOM   3411  CA  HIS A 658     -36.587  -3.617 -19.558  1.00 47.28           C  
ATOM   3412  C   HIS A 658     -35.192  -3.460 -20.163  1.00 47.06           C  
ATOM   3413  O   HIS A 658     -34.828  -2.374 -20.618  1.00 47.07           O  
ATOM   3414  CB  HIS A 658     -36.493  -3.560 -18.033  1.00 47.29           C  
ATOM   3415  CG  HIS A 658     -37.784  -3.222 -17.357  1.00 47.42           C  
ATOM   3416  ND1 HIS A 658     -38.803  -4.135 -17.194  1.00 47.56           N  
ATOM   3417  CD2 HIS A 658     -38.218  -2.070 -16.793  1.00 47.52           C  
ATOM   3418  CE1 HIS A 658     -39.812  -3.559 -16.564  1.00 47.56           C  
ATOM   3419  NE2 HIS A 658     -39.482  -2.305 -16.309  1.00 47.50           N  
ATOM   3420  N   TYR A 659     -34.422  -4.546 -20.173  1.00 46.73           N  
ATOM   3421  CA  TYR A 659     -33.019  -4.499 -20.580  1.00 46.40           C  
ATOM   3422  C   TYR A 659     -32.761  -5.064 -21.979  1.00 46.17           C  
ATOM   3423  O   TYR A 659     -31.615  -5.111 -22.428  1.00 46.17           O  
ATOM   3424  CB  TYR A 659     -32.144  -5.214 -19.542  1.00 46.42           C  
ATOM   3425  CG  TYR A 659     -32.255  -4.639 -18.146  1.00 46.41           C  
ATOM   3426  CD1 TYR A 659     -33.046  -5.257 -17.179  1.00 46.37           C  
ATOM   3427  CD2 TYR A 659     -31.573  -3.473 -17.792  1.00 46.44           C  
ATOM   3428  CE1 TYR A 659     -33.157  -4.731 -15.894  1.00 46.43           C  
ATOM   3429  CE2 TYR A 659     -31.676  -2.937 -16.509  1.00 46.41           C  
ATOM   3430  CZ  TYR A 659     -32.469  -3.571 -15.567  1.00 46.44           C  
ATOM   3431  OH  TYR A 659     -32.574  -3.049 -14.297  1.00 46.57           O  
ATOM   3432  N   LEU A 660     -33.828  -5.470 -22.666  1.00 45.86           N  
ATOM   3433  CA  LEU A 660     -33.718  -6.109 -23.979  1.00 45.55           C  
ATOM   3434  C   LEU A 660     -32.958  -5.252 -24.975  1.00 45.36           C  
ATOM   3435  O   LEU A 660     -32.061  -5.747 -25.651  1.00 45.32           O  
ATOM   3436  CB  LEU A 660     -35.099  -6.474 -24.540  1.00 45.54           C  
ATOM   3437  CG  LEU A 660     -35.182  -7.308 -25.826  1.00 45.37           C  
ATOM   3438  CD1 LEU A 660     -34.639  -8.717 -25.638  1.00 45.16           C  
ATOM   3439  CD2 LEU A 660     -36.614  -7.361 -26.318  1.00 45.29           C  
ATOM   3440  N   LEU A 661     -33.308  -3.970 -25.050  1.00 45.13           N  
ATOM   3441  CA  LEU A 661     -32.642  -3.055 -25.969  1.00 44.93           C  
ATOM   3442  C   LEU A 661     -31.138  -2.987 -25.708  1.00 44.82           C  
ATOM   3443  O   LEU A 661     -30.339  -3.085 -26.638  1.00 44.78           O  
ATOM   3444  CB  LEU A 661     -33.280  -1.663 -25.920  1.00 44.89           C  
ATOM   3445  CG  LEU A 661     -32.936  -0.680 -27.047  1.00 44.81           C  
ATOM   3446  CD1 LEU A 661     -33.255  -1.245 -28.429  1.00 44.74           C  
ATOM   3447  CD2 LEU A 661     -33.662   0.635 -26.834  1.00 44.78           C  
ATOM   3448  N   GLN A 662     -30.761  -2.853 -24.440  1.00 44.70           N  
ATOM   3449  CA  GLN A 662     -29.355  -2.733 -24.068  1.00 44.63           C  
ATOM   3450  C   GLN A 662     -28.575  -4.032 -24.246  1.00 44.43           C  
ATOM   3451  O   GLN A 662     -27.426  -4.005 -24.680  1.00 44.47           O  
ATOM   3452  CB  GLN A 662     -29.205  -2.211 -22.638  1.00 44.73           C  
ATOM   3453  CG  GLN A 662     -29.605  -0.746 -22.466  1.00 45.15           C  
ATOM   3454  CD  GLN A 662     -31.090  -0.556 -22.173  1.00 45.81           C  
ATOM   3455  OE1 GLN A 662     -31.838  -1.523 -21.982  1.00 46.05           O  
ATOM   3456  NE2 GLN A 662     -31.520   0.702 -22.127  1.00 46.04           N  
ATOM   3457  N   LEU A 663     -29.198  -5.159 -23.914  1.00 44.19           N  
ATOM   3458  CA  LEU A 663     -28.555  -6.464 -24.066  1.00 43.96           C  
ATOM   3459  C   LEU A 663     -28.336  -6.818 -25.540  1.00 43.84           C  
ATOM   3460  O   LEU A 663     -27.280  -7.341 -25.905  1.00 43.79           O  
ATOM   3461  CB  LEU A 663     -29.353  -7.557 -23.344  1.00 43.93           C  
ATOM   3462  CG  LEU A 663     -29.366  -7.529 -21.809  1.00 43.77           C  
ATOM   3463  CD1 LEU A 663     -30.446  -8.448 -21.264  1.00 43.49           C  
ATOM   3464  CD2 LEU A 663     -28.006  -7.887 -21.219  1.00 43.61           C  
ATOM   3465  N   VAL A 664     -29.330  -6.514 -26.378  1.00 43.67           N  
ATOM   3466  CA  VAL A 664     -29.232  -6.691 -27.831  1.00 43.47           C  
ATOM   3467  C   VAL A 664     -28.156  -5.765 -28.387  1.00 43.34           C  
ATOM   3468  O   VAL A 664     -27.442  -6.107 -29.331  1.00 43.29           O  
ATOM   3469  CB  VAL A 664     -30.590  -6.412 -28.532  1.00 43.47           C  
ATOM   3470  CG1 VAL A 664     -30.430  -6.305 -30.047  1.00 43.46           C  
ATOM   3471  CG2 VAL A 664     -31.603  -7.491 -28.183  1.00 43.46           C  
ATOM   3472  N   GLN A 665     -28.045  -4.593 -27.778  1.00 43.24           N  
ATOM   3473  CA  GLN A 665     -27.038  -3.621 -28.156  1.00 43.14           C  
ATOM   3474  C   GLN A 665     -25.665  -4.054 -27.638  1.00 43.10           C  
ATOM   3475  O   GLN A 665     -24.643  -3.723 -28.236  1.00 43.07           O  
ATOM   3476  CB  GLN A 665     -27.425  -2.244 -27.615  1.00 43.11           C  
ATOM   3477  CG  GLN A 665     -27.087  -1.073 -28.528  1.00 43.05           C  
ATOM   3478  CD  GLN A 665     -27.847  -1.064 -29.851  1.00 42.90           C  
ATOM   3479  OE1 GLN A 665     -27.272  -0.776 -30.899  1.00 42.93           O  
ATOM   3480  NE2 GLN A 665     -29.139  -1.365 -29.805  1.00 42.79           N  
ATOM   3481  N   ALA A 666     -25.655  -4.819 -26.546  1.00 43.11           N  
ATOM   3482  CA  ALA A 666     -24.414  -5.292 -25.925  1.00 43.12           C  
ATOM   3483  C   ALA A 666     -23.709  -6.379 -26.738  1.00 43.12           C  
ATOM   3484  O   ALA A 666     -22.546  -6.695 -26.478  1.00 43.10           O  
ATOM   3485  CB  ALA A 666     -24.676  -5.774 -24.503  1.00 43.14           C  
ATOM   3486  N   VAL A 667     -24.418  -6.939 -27.717  1.00 43.10           N  
ATOM   3487  CA  VAL A 667     -23.871  -7.954 -28.622  1.00 43.09           C  
ATOM   3488  C   VAL A 667     -22.712  -7.386 -29.444  1.00 43.11           C  
ATOM   3489  O   VAL A 667     -21.821  -8.125 -29.867  1.00 43.15           O  
ATOM   3490  CB  VAL A 667     -24.975  -8.534 -29.552  1.00 43.09           C  
ATOM   3491  CG1 VAL A 667     -24.397  -9.482 -30.594  1.00 43.02           C  
ATOM   3492  CG2 VAL A 667     -26.026  -9.258 -28.726  1.00 43.12           C  
ATOM   3493  N   LYS A 668     -22.720  -6.069 -29.641  1.00 43.12           N  
ATOM   3494  CA  LYS A 668     -21.675  -5.385 -30.403  1.00 43.13           C  
ATOM   3495  C   LYS A 668     -20.292  -5.542 -29.772  1.00 43.21           C  
ATOM   3496  O   LYS A 668     -19.284  -5.588 -30.477  1.00 43.19           O  
ATOM   3497  CB  LYS A 668     -22.025  -3.908 -30.589  1.00 43.08           C  
ATOM   3498  CG  LYS A 668     -23.219  -3.676 -31.499  1.00 42.97           C  
ATOM   3499  CD  LYS A 668     -23.540  -2.204 -31.623  1.00 42.86           C  
ATOM   3500  CE  LYS A 668     -24.665  -1.963 -32.609  1.00 42.74           C  
ATOM   3501  NZ  LYS A 668     -24.983  -0.512 -32.713  1.00 42.70           N  
ATOM   3502  N   PHE A 669     -20.260  -5.649 -28.446  1.00 43.34           N  
ATOM   3503  CA  PHE A 669     -19.007  -5.781 -27.699  1.00 43.52           C  
ATOM   3504  C   PHE A 669     -18.437  -7.201 -27.725  1.00 43.60           C  
ATOM   3505  O   PHE A 669     -17.302  -7.434 -27.294  1.00 43.62           O  
ATOM   3506  CB  PHE A 669     -19.200  -5.330 -26.250  1.00 43.54           C  
ATOM   3507  CG  PHE A 669     -19.821  -3.973 -26.111  1.00 43.68           C  
ATOM   3508  CD1 PHE A 669     -21.083  -3.829 -25.544  1.00 43.80           C  
ATOM   3509  CD2 PHE A 669     -19.150  -2.837 -26.551  1.00 43.75           C  
ATOM   3510  CE1 PHE A 669     -21.666  -2.573 -25.412  1.00 43.84           C  
ATOM   3511  CE2 PHE A 669     -19.723  -1.578 -26.424  1.00 43.85           C  
ATOM   3512  CZ  PHE A 669     -20.983  -1.445 -25.852  1.00 43.85           C  
ATOM   3513  N   GLU A 670     -19.232  -8.144 -28.224  1.00 43.68           N  
ATOM   3514  CA  GLU A 670     -18.822  -9.539 -28.316  1.00 43.77           C  
ATOM   3515  C   GLU A 670     -17.797  -9.724 -29.439  1.00 43.82           C  
ATOM   3516  O   GLU A 670     -17.949  -9.134 -30.513  1.00 43.85           O  
ATOM   3517  CB  GLU A 670     -20.044 -10.424 -28.562  1.00 43.77           C  
ATOM   3518  CG  GLU A 670     -19.874 -11.866 -28.131  1.00 43.92           C  
ATOM   3519  CD  GLU A 670     -19.913 -12.040 -26.623  1.00 44.12           C  
ATOM   3520  OE1 GLU A 670     -20.756 -11.389 -25.965  1.00 44.04           O  
ATOM   3521  OE2 GLU A 670     -19.104 -12.835 -26.096  1.00 44.32           O  
ATOM   3522  N   PRO A 671     -16.743 -10.529 -29.191  1.00 43.86           N  
ATOM   3523  CA  PRO A 671     -15.731 -10.792 -30.216  1.00 43.89           C  
ATOM   3524  C   PRO A 671     -16.227 -11.694 -31.350  1.00 43.97           C  
ATOM   3525  O   PRO A 671     -15.826 -11.509 -32.501  1.00 43.99           O  
ATOM   3526  CB  PRO A 671     -14.610 -11.483 -29.432  1.00 43.87           C  
ATOM   3527  CG  PRO A 671     -15.280 -12.073 -28.247  1.00 43.86           C  
ATOM   3528  CD  PRO A 671     -16.373 -11.121 -27.892  1.00 43.86           C  
ATOM   3529  N   TYR A 672     -17.092 -12.651 -31.025  1.00 44.06           N  
ATOM   3530  CA  TYR A 672     -17.567 -13.628 -32.004  1.00 44.18           C  
ATOM   3531  C   TYR A 672     -19.065 -13.533 -32.243  1.00 44.21           C  
ATOM   3532  O   TYR A 672     -19.806 -13.018 -31.401  1.00 44.23           O  
ATOM   3533  CB  TYR A 672     -17.207 -15.047 -31.564  1.00 44.23           C  
ATOM   3534  CG  TYR A 672     -15.724 -15.276 -31.415  1.00 44.47           C  
ATOM   3535  CD1 TYR A 672     -15.111 -15.204 -30.164  1.00 44.67           C  
ATOM   3536  CD2 TYR A 672     -14.929 -15.558 -32.524  1.00 44.68           C  
ATOM   3537  CE1 TYR A 672     -13.744 -15.410 -30.020  1.00 44.77           C  
ATOM   3538  CE2 TYR A 672     -13.560 -15.766 -32.392  1.00 44.85           C  
ATOM   3539  CZ  TYR A 672     -12.974 -15.690 -31.138  1.00 44.85           C  
ATOM   3540  OH  TYR A 672     -11.619 -15.894 -31.004  1.00 44.97           O  
ATOM   3541  N   HIS A 673     -19.497 -14.047 -33.394  1.00 44.23           N  
ATOM   3542  CA  HIS A 673     -20.909 -14.055 -33.778  1.00 44.21           C  
ATOM   3543  C   HIS A 673     -21.732 -14.931 -32.833  1.00 44.20           C  
ATOM   3544  O   HIS A 673     -22.668 -14.449 -32.193  1.00 44.22           O  
ATOM   3545  CB  HIS A 673     -21.072 -14.522 -35.227  1.00 44.18           C  
ATOM   3546  CG  HIS A 673     -20.451 -13.607 -36.236  1.00 44.23           C  
ATOM   3547  ND1 HIS A 673     -19.087 -13.480 -36.391  1.00 44.28           N  
ATOM   3548  CD2 HIS A 673     -21.009 -12.788 -37.157  1.00 44.26           C  
ATOM   3549  CE1 HIS A 673     -18.832 -12.617 -37.358  1.00 44.22           C  
ATOM   3550  NE2 HIS A 673     -19.982 -12.183 -37.841  1.00 44.23           N  
ATOM   3551  N   ASP A 674     -21.373 -16.210 -32.743  1.00 44.15           N  
ATOM   3552  CA  ASP A 674     -22.006 -17.125 -31.798  1.00 44.13           C  
ATOM   3553  C   ASP A 674     -21.406 -16.922 -30.411  1.00 44.12           C  
ATOM   3554  O   ASP A 674     -20.183 -16.970 -30.246  1.00 44.13           O  
ATOM   3555  CB  ASP A 674     -21.830 -18.581 -32.250  1.00 44.15           C  
ATOM   3556  CG  ASP A 674     -22.693 -19.558 -31.453  1.00 44.16           C  
ATOM   3557  OD1 ASP A 674     -23.905 -19.302 -31.284  1.00 44.28           O  
ATOM   3558  OD2 ASP A 674     -22.158 -20.595 -31.006  1.00 44.07           O  
ATOM   3559  N   SER A 675     -22.272 -16.685 -29.425  1.00 44.10           N  
ATOM   3560  CA  SER A 675     -21.851 -16.445 -28.042  1.00 44.08           C  
ATOM   3561  C   SER A 675     -22.982 -16.706 -27.057  1.00 44.07           C  
ATOM   3562  O   SER A 675     -24.152 -16.744 -27.444  1.00 44.09           O  
ATOM   3563  CB  SER A 675     -21.355 -15.012 -27.873  1.00 44.09           C  
ATOM   3564  OG  SER A 675     -22.377 -14.082 -28.189  1.00 44.04           O  
ATOM   3565  N   ALA A 676     -22.623 -16.862 -25.782  1.00 44.07           N  
ATOM   3566  CA  ALA A 676     -23.589 -17.146 -24.720  1.00 44.07           C  
ATOM   3567  C   ALA A 676     -24.690 -16.093 -24.670  1.00 44.07           C  
ATOM   3568  O   ALA A 676     -25.864 -16.425 -24.490  1.00 44.06           O  
ATOM   3569  CB  ALA A 676     -22.885 -17.253 -23.370  1.00 44.04           C  
ATOM   3570  N   LEU A 677     -24.299 -14.832 -24.851  1.00 44.10           N  
ATOM   3571  CA  LEU A 677     -25.227 -13.705 -24.832  1.00 44.11           C  
ATOM   3572  C   LEU A 677     -26.160 -13.724 -26.043  1.00 44.12           C  
ATOM   3573  O   LEU A 677     -27.354 -13.455 -25.913  1.00 44.11           O  
ATOM   3574  CB  LEU A 677     -24.452 -12.384 -24.761  1.00 44.11           C  
ATOM   3575  CG  LEU A 677     -25.221 -11.061 -24.691  1.00 44.08           C  
ATOM   3576  CD1 LEU A 677     -25.934 -10.898 -23.358  1.00 43.99           C  
ATOM   3577  CD2 LEU A 677     -24.279  -9.892 -24.935  1.00 44.20           C  
ATOM   3578  N   ALA A 678     -25.607 -14.048 -27.210  1.00 44.17           N  
ATOM   3579  CA  ALA A 678     -26.383 -14.123 -28.444  1.00 44.24           C  
ATOM   3580  C   ALA A 678     -27.398 -15.260 -28.390  1.00 44.32           C  
ATOM   3581  O   ALA A 678     -28.549 -15.087 -28.795  1.00 44.35           O  
ATOM   3582  CB  ALA A 678     -25.465 -14.280 -29.645  1.00 44.22           C  
ATOM   3583  N   ARG A 679     -26.965 -16.411 -27.873  1.00 44.40           N  
ATOM   3584  CA  ARG A 679     -27.825 -17.588 -27.734  1.00 44.49           C  
ATOM   3585  C   ARG A 679     -28.897 -17.395 -26.660  1.00 44.51           C  
ATOM   3586  O   ARG A 679     -29.969 -18.003 -26.730  1.00 44.51           O  
ATOM   3587  CB  ARG A 679     -26.992 -18.835 -27.426  1.00 44.51           C  
ATOM   3588  CG  ARG A 679     -26.206 -19.371 -28.612  1.00 44.72           C  
ATOM   3589  CD  ARG A 679     -25.508 -20.680 -28.272  1.00 45.16           C  
ATOM   3590  NE  ARG A 679     -24.853 -21.271 -29.440  1.00 45.53           N  
ATOM   3591  CZ  ARG A 679     -24.287 -22.477 -29.466  1.00 45.74           C  
ATOM   3592  NH1 ARG A 679     -24.289 -23.251 -28.384  1.00 45.89           N  
ATOM   3593  NH2 ARG A 679     -23.720 -22.916 -30.582  1.00 45.74           N  
ATOM   3594  N   PHE A 680     -28.593 -16.547 -25.677  1.00 44.53           N  
ATOM   3595  CA  PHE A 680     -29.517 -16.218 -24.591  1.00 44.56           C  
ATOM   3596  C   PHE A 680     -30.722 -15.418 -25.085  1.00 44.58           C  
ATOM   3597  O   PHE A 680     -31.866 -15.749 -24.768  1.00 44.57           O  
ATOM   3598  CB  PHE A 680     -28.783 -15.449 -23.484  1.00 44.56           C  
ATOM   3599  CG  PHE A 680     -29.688 -14.910 -22.411  1.00 44.61           C  
ATOM   3600  CD1 PHE A 680     -30.096 -15.718 -21.354  1.00 44.64           C  
ATOM   3601  CD2 PHE A 680     -30.127 -13.591 -22.453  1.00 44.55           C  
ATOM   3602  CE1 PHE A 680     -30.933 -15.222 -20.359  1.00 44.62           C  
ATOM   3603  CE2 PHE A 680     -30.962 -13.088 -21.464  1.00 44.57           C  
ATOM   3604  CZ  PHE A 680     -31.367 -13.905 -20.417  1.00 44.58           C  
ATOM   3605  N   LEU A 681     -30.454 -14.364 -25.853  1.00 44.64           N  
ATOM   3606  CA  LEU A 681     -31.500 -13.497 -26.389  1.00 44.73           C  
ATOM   3607  C   LEU A 681     -32.407 -14.254 -27.342  1.00 44.83           C  
ATOM   3608  O   LEU A 681     -33.613 -14.004 -27.396  1.00 44.84           O  
ATOM   3609  CB  LEU A 681     -30.886 -12.293 -27.103  1.00 44.69           C  
ATOM   3610  CG  LEU A 681     -30.181 -11.245 -26.237  1.00 44.73           C  
ATOM   3611  CD1 LEU A 681     -29.249 -10.408 -27.090  1.00 44.70           C  
ATOM   3612  CD2 LEU A 681     -31.174 -10.357 -25.486  1.00 44.68           C  
ATOM   3613  N   LEU A 682     -31.809 -15.182 -28.086  1.00 44.98           N  
ATOM   3614  CA  LEU A 682     -32.534 -16.040 -29.013  1.00 45.10           C  
ATOM   3615  C   LEU A 682     -33.518 -16.947 -28.277  1.00 45.19           C  
ATOM   3616  O   LEU A 682     -34.675 -17.067 -28.678  1.00 45.16           O  
ATOM   3617  CB  LEU A 682     -31.549 -16.873 -29.835  1.00 45.07           C  
ATOM   3618  CG  LEU A 682     -32.059 -17.467 -31.149  1.00 45.13           C  
ATOM   3619  CD1 LEU A 682     -30.947 -17.471 -32.172  1.00 45.19           C  
ATOM   3620  CD2 LEU A 682     -32.610 -18.867 -30.960  1.00 45.28           C  
ATOM   3621  N   LYS A 683     -33.053 -17.571 -27.197  1.00 45.34           N  
ATOM   3622  CA  LYS A 683     -33.884 -18.471 -26.399  1.00 45.49           C  
ATOM   3623  C   LYS A 683     -35.073 -17.753 -25.763  1.00 45.57           C  
ATOM   3624  O   LYS A 683     -36.204 -18.240 -25.828  1.00 45.59           O  
ATOM   3625  CB  LYS A 683     -33.044 -19.174 -25.328  1.00 45.49           C  
ATOM   3626  CG  LYS A 683     -32.142 -20.262 -25.879  1.00 45.59           C  
ATOM   3627  CD  LYS A 683     -31.162 -20.756 -24.827  1.00 45.82           C  
ATOM   3628  CE  LYS A 683     -30.234 -21.825 -25.399  1.00 45.86           C  
ATOM   3629  NZ  LYS A 683     -29.268 -22.333 -24.382  1.00 45.88           N  
ATOM   3630  N   ARG A 684     -34.813 -16.589 -25.170  1.00 45.66           N  
ATOM   3631  CA  ARG A 684     -35.851 -15.819 -24.484  1.00 45.74           C  
ATOM   3632  C   ARG A 684     -36.897 -15.285 -25.464  1.00 45.81           C  
ATOM   3633  O   ARG A 684     -38.084 -15.198 -25.139  1.00 45.81           O  
ATOM   3634  CB  ARG A 684     -35.235 -14.674 -23.666  1.00 45.74           C  
ATOM   3635  CG  ARG A 684     -34.184 -15.101 -22.629  1.00 45.74           C  
ATOM   3636  CD  ARG A 684     -34.703 -16.152 -21.651  1.00 45.84           C  
ATOM   3637  NE  ARG A 684     -35.757 -15.637 -20.779  1.00 45.82           N  
ATOM   3638  CZ  ARG A 684     -35.560 -15.151 -19.555  1.00 45.84           C  
ATOM   3639  NH1 ARG A 684     -34.342 -15.107 -19.029  1.00 45.81           N  
ATOM   3640  NH2 ARG A 684     -36.591 -14.707 -18.850  1.00 45.82           N  
ATOM   3641  N   GLY A 685     -36.446 -14.947 -26.669  1.00 45.88           N  
ATOM   3642  CA  GLY A 685     -37.337 -14.490 -27.727  1.00 45.97           C  
ATOM   3643  C   GLY A 685     -38.244 -15.591 -28.237  1.00 46.04           C  
ATOM   3644  O   GLY A 685     -39.339 -15.318 -28.730  1.00 46.03           O  
ATOM   3645  N   LEU A 686     -37.781 -16.835 -28.123  1.00 46.16           N  
ATOM   3646  CA  LEU A 686     -38.559 -18.001 -28.536  1.00 46.28           C  
ATOM   3647  C   LEU A 686     -39.456 -18.503 -27.412  1.00 46.38           C  
ATOM   3648  O   LEU A 686     -40.404 -19.248 -27.653  1.00 46.42           O  
ATOM   3649  CB  LEU A 686     -37.640 -19.127 -29.010  1.00 46.24           C  
ATOM   3650  CG  LEU A 686     -36.828 -18.905 -30.287  1.00 46.28           C  
ATOM   3651  CD1 LEU A 686     -35.964 -20.114 -30.567  1.00 46.27           C  
ATOM   3652  CD2 LEU A 686     -37.726 -18.608 -31.473  1.00 46.32           C  
ATOM   3653  N   ARG A 687     -39.148 -18.091 -26.186  1.00 46.49           N  
ATOM   3654  CA  ARG A 687     -39.931 -18.472 -25.017  1.00 46.59           C  
ATOM   3655  C   ARG A 687     -41.121 -17.528 -24.823  1.00 46.63           C  
ATOM   3656  O   ARG A 687     -42.118 -17.893 -24.194  1.00 46.68           O  
ATOM   3657  CB  ARG A 687     -39.031 -18.500 -23.777  1.00 46.60           C  
ATOM   3658  CG  ARG A 687     -39.676 -19.066 -22.515  1.00 46.87           C  
ATOM   3659  CD  ARG A 687     -38.730 -20.001 -21.765  1.00 47.34           C  
ATOM   3660  NE  ARG A 687     -37.401 -19.425 -21.553  1.00 47.71           N  
ATOM   3661  CZ  ARG A 687     -36.367 -20.078 -21.028  1.00 47.89           C  
ATOM   3662  NH1 ARG A 687     -36.489 -21.346 -20.651  1.00 47.98           N  
ATOM   3663  NH2 ARG A 687     -35.202 -19.463 -20.881  1.00 47.98           N  
ATOM   3664  N   ASN A 688     -41.013 -16.324 -25.383  1.00 46.66           N  
ATOM   3665  CA  ASN A 688     -42.032 -15.289 -25.224  1.00 46.68           C  
ATOM   3666  C   ASN A 688     -42.274 -14.524 -26.522  1.00 46.71           C  
ATOM   3667  O   ASN A 688     -41.331 -14.034 -27.148  1.00 46.76           O  
ATOM   3668  CB  ASN A 688     -41.623 -14.321 -24.107  1.00 46.65           C  
ATOM   3669  CG  ASN A 688     -42.737 -13.369 -23.707  1.00 46.57           C  
ATOM   3670  OD1 ASN A 688     -43.744 -13.233 -24.399  1.00 46.48           O  
ATOM   3671  ND2 ASN A 688     -42.551 -12.697 -22.579  1.00 46.51           N  
ATOM   3672  N   LYS A 689     -43.545 -14.419 -26.910  1.00 46.72           N  
ATOM   3673  CA  LYS A 689     -43.942 -13.695 -28.121  1.00 46.72           C  
ATOM   3674  C   LYS A 689     -43.682 -12.193 -28.022  1.00 46.70           C  
ATOM   3675  O   LYS A 689     -43.399 -11.547 -29.030  1.00 46.70           O  
ATOM   3676  CB  LYS A 689     -45.419 -13.940 -28.452  1.00 46.73           C  
ATOM   3677  CG  LYS A 689     -45.717 -15.248 -29.173  1.00 46.80           C  
ATOM   3678  CD  LYS A 689     -47.139 -15.237 -29.732  1.00 46.96           C  
ATOM   3679  CE  LYS A 689     -47.541 -16.573 -30.350  1.00 47.03           C  
ATOM   3680  NZ  LYS A 689     -46.904 -16.833 -31.672  1.00 47.09           N  
ATOM   3681  N   ARG A 690     -43.785 -11.644 -26.813  1.00 46.68           N  
ATOM   3682  CA  ARG A 690     -43.570 -10.213 -26.596  1.00 46.70           C  
ATOM   3683  C   ARG A 690     -42.084  -9.859 -26.626  1.00 46.65           C  
ATOM   3684  O   ARG A 690     -41.690  -8.885 -27.270  1.00 46.67           O  
ATOM   3685  CB  ARG A 690     -44.218  -9.745 -25.288  1.00 46.73           C  
ATOM   3686  CG  ARG A 690     -44.170  -8.236 -25.077  1.00 46.85           C  
ATOM   3687  CD  ARG A 690     -45.061  -7.797 -23.924  1.00 47.24           C  
ATOM   3688  NE  ARG A 690     -44.791  -6.418 -23.508  1.00 47.52           N  
ATOM   3689  CZ  ARG A 690     -45.347  -5.336 -24.049  1.00 47.63           C  
ATOM   3690  NH1 ARG A 690     -46.218  -5.449 -25.046  1.00 47.71           N  
ATOM   3691  NH2 ARG A 690     -45.027  -4.133 -23.591  1.00 47.63           N  
ATOM   3692  N   ILE A 691     -41.268 -10.653 -25.933  1.00 46.57           N  
ATOM   3693  CA  ILE A 691     -39.813 -10.491 -25.963  1.00 46.48           C  
ATOM   3694  C   ILE A 691     -39.294 -10.665 -27.390  1.00 46.46           C  
ATOM   3695  O   ILE A 691     -38.450  -9.898 -27.843  1.00 46.48           O  
ATOM   3696  CB  ILE A 691     -39.109 -11.466 -24.985  1.00 46.46           C  
ATOM   3697  CG1 ILE A 691     -39.358 -11.022 -23.541  1.00 46.48           C  
ATOM   3698  CG2 ILE A 691     -37.607 -11.552 -25.263  1.00 46.36           C  
ATOM   3699  CD1 ILE A 691     -39.049 -12.078 -22.501  1.00 46.60           C  
ATOM   3700  N   GLY A 692     -39.826 -11.660 -28.095  1.00 46.41           N  
ATOM   3701  CA  GLY A 692     -39.465 -11.910 -29.485  1.00 46.38           C  
ATOM   3702  C   GLY A 692     -39.858 -10.798 -30.445  1.00 46.37           C  
ATOM   3703  O   GLY A 692     -39.107 -10.485 -31.372  1.00 46.36           O  
ATOM   3704  N   HIS A 693     -41.033 -10.206 -30.225  1.00 46.34           N  
ATOM   3705  CA  HIS A 693     -41.543  -9.126 -31.077  1.00 46.31           C  
ATOM   3706  C   HIS A 693     -40.597  -7.930 -31.091  1.00 46.32           C  
ATOM   3707  O   HIS A 693     -40.198  -7.460 -32.159  1.00 46.34           O  
ATOM   3708  CB  HIS A 693     -42.944  -8.687 -30.630  1.00 46.30           C  
ATOM   3709  CG  HIS A 693     -43.489  -7.516 -31.394  1.00 46.19           C  
ATOM   3710  ND1 HIS A 693     -44.392  -7.654 -32.426  1.00 46.03           N  
ATOM   3711  CD2 HIS A 693     -43.256  -6.187 -31.274  1.00 46.04           C  
ATOM   3712  CE1 HIS A 693     -44.691  -6.461 -32.909  1.00 45.92           C  
ATOM   3713  NE2 HIS A 693     -44.014  -5.555 -32.229  1.00 45.93           N  
ATOM   3714  N   PHE A 694     -40.251  -7.441 -29.902  1.00 46.32           N  
ATOM   3715  CA  PHE A 694     -39.320  -6.327 -29.769  1.00 46.35           C  
ATOM   3716  C   PHE A 694     -37.930  -6.725 -30.242  1.00 46.37           C  
ATOM   3717  O   PHE A 694     -37.272  -5.956 -30.937  1.00 46.38           O  
ATOM   3718  CB  PHE A 694     -39.282  -5.805 -28.330  1.00 46.34           C  
ATOM   3719  CG  PHE A 694     -40.547  -5.117 -27.902  1.00 46.30           C  
ATOM   3720  CD1 PHE A 694     -41.455  -5.761 -27.071  1.00 46.32           C  
ATOM   3721  CD2 PHE A 694     -40.836  -3.827 -28.334  1.00 46.22           C  
ATOM   3722  CE1 PHE A 694     -42.632  -5.131 -26.673  1.00 46.32           C  
ATOM   3723  CE2 PHE A 694     -42.010  -3.189 -27.943  1.00 46.22           C  
ATOM   3724  CZ  PHE A 694     -42.909  -3.843 -27.109  1.00 46.22           C  
ATOM   3725  N   LEU A 695     -37.504  -7.935 -29.882  1.00 46.43           N  
ATOM   3726  CA  LEU A 695     -36.239  -8.497 -30.356  1.00 46.50           C  
ATOM   3727  C   LEU A 695     -36.120  -8.355 -31.871  1.00 46.58           C  
ATOM   3728  O   LEU A 695     -35.110  -7.859 -32.370  1.00 46.63           O  
ATOM   3729  CB  LEU A 695     -36.104  -9.968 -29.942  1.00 46.46           C  
ATOM   3730  CG  LEU A 695     -34.863 -10.761 -30.369  1.00 46.39           C  
ATOM   3731  CD1 LEU A 695     -33.607 -10.256 -29.680  1.00 46.32           C  
ATOM   3732  CD2 LEU A 695     -35.057 -12.241 -30.087  1.00 46.31           C  
ATOM   3733  N   PHE A 696     -37.164  -8.773 -32.587  1.00 46.66           N  
ATOM   3734  CA  PHE A 696     -37.232  -8.642 -34.040  1.00 46.73           C  
ATOM   3735  C   PHE A 696     -36.889  -7.225 -34.492  1.00 46.79           C  
ATOM   3736  O   PHE A 696     -35.983  -7.032 -35.303  1.00 46.82           O  
ATOM   3737  CB  PHE A 696     -38.623  -9.047 -34.545  1.00 46.73           C  
ATOM   3738  CG  PHE A 696     -38.857  -8.752 -36.002  1.00 46.72           C  
ATOM   3739  CD1 PHE A 696     -38.502  -9.677 -36.979  1.00 46.61           C  
ATOM   3740  CD2 PHE A 696     -39.445  -7.551 -36.397  1.00 46.64           C  
ATOM   3741  CE1 PHE A 696     -38.717  -9.409 -38.328  1.00 46.57           C  
ATOM   3742  CE2 PHE A 696     -39.662  -7.273 -37.743  1.00 46.62           C  
ATOM   3743  CZ  PHE A 696     -39.299  -8.205 -38.711  1.00 46.59           C  
ATOM   3744  N   TRP A 697     -37.606  -6.242 -33.950  1.00 46.88           N  
ATOM   3745  CA  TRP A 697     -37.420  -4.840 -34.328  1.00 46.98           C  
ATOM   3746  C   TRP A 697     -36.140  -4.221 -33.761  1.00 46.99           C  
ATOM   3747  O   TRP A 697     -35.640  -3.226 -34.292  1.00 46.96           O  
ATOM   3748  CB  TRP A 697     -38.639  -4.011 -33.925  1.00 47.02           C  
ATOM   3749  CG  TRP A 697     -39.874  -4.385 -34.677  1.00 47.14           C  
ATOM   3750  CD1 TRP A 697     -40.898  -5.166 -34.229  1.00 47.23           C  
ATOM   3751  CD2 TRP A 697     -40.215  -4.004 -36.017  1.00 47.18           C  
ATOM   3752  NE1 TRP A 697     -41.860  -5.292 -35.202  1.00 47.31           N  
ATOM   3753  CE2 TRP A 697     -41.466  -4.589 -36.310  1.00 47.23           C  
ATOM   3754  CE3 TRP A 697     -39.587  -3.223 -36.996  1.00 47.19           C  
ATOM   3755  CZ2 TRP A 697     -42.104  -4.419 -37.544  1.00 47.23           C  
ATOM   3756  CZ3 TRP A 697     -40.223  -3.055 -38.225  1.00 47.23           C  
ATOM   3757  CH2 TRP A 697     -41.469  -3.652 -38.486  1.00 47.17           C  
ATOM   3758  N   PHE A 698     -35.620  -4.813 -32.688  1.00 47.03           N  
ATOM   3759  CA  PHE A 698     -34.364  -4.371 -32.086  1.00 47.09           C  
ATOM   3760  C   PHE A 698     -33.178  -4.817 -32.936  1.00 47.11           C  
ATOM   3761  O   PHE A 698     -32.193  -4.085 -33.075  1.00 47.13           O  
ATOM   3762  CB  PHE A 698     -34.232  -4.900 -30.653  1.00 47.09           C  
ATOM   3763  CG  PHE A 698     -35.109  -4.190 -29.650  1.00 47.15           C  
ATOM   3764  CD1 PHE A 698     -35.026  -4.509 -28.300  1.00 47.25           C  
ATOM   3765  CD2 PHE A 698     -36.003  -3.195 -30.047  1.00 47.18           C  
ATOM   3766  CE1 PHE A 698     -35.828  -3.865 -27.363  1.00 47.29           C  
ATOM   3767  CE2 PHE A 698     -36.806  -2.545 -29.119  1.00 47.20           C  
ATOM   3768  CZ  PHE A 698     -36.718  -2.879 -27.773  1.00 47.28           C  
ATOM   3769  N   LEU A 699     -33.287  -6.019 -33.503  1.00 47.11           N  
ATOM   3770  CA  LEU A 699     -32.277  -6.554 -34.411  1.00 47.13           C  
ATOM   3771  C   LEU A 699     -32.385  -5.891 -35.780  1.00 47.18           C  
ATOM   3772  O   LEU A 699     -31.375  -5.497 -36.363  1.00 47.21           O  
ATOM   3773  CB  LEU A 699     -32.417  -8.074 -34.561  1.00 47.11           C  
ATOM   3774  CG  LEU A 699     -32.286  -8.998 -33.345  1.00 47.08           C  
ATOM   3775  CD1 LEU A 699     -32.936 -10.341 -33.636  1.00 47.08           C  
ATOM   3776  CD2 LEU A 699     -30.843  -9.191 -32.921  1.00 47.00           C  
ATOM   3777  N   ARG A 700     -33.614  -5.764 -36.277  1.00 47.23           N  
ATOM   3778  CA  ARG A 700     -33.881  -5.192 -37.597  1.00 47.33           C  
ATOM   3779  C   ARG A 700     -33.461  -3.726 -37.705  1.00 47.39           C  
ATOM   3780  O   ARG A 700     -33.145  -3.246 -38.795  1.00 47.35           O  
ATOM   3781  CB  ARG A 700     -35.363  -5.335 -37.951  1.00 47.35           C  
ATOM   3782  CG  ARG A 700     -35.639  -5.419 -39.445  1.00 47.45           C  
ATOM   3783  CD  ARG A 700     -37.131  -5.381 -39.750  1.00 47.55           C  
ATOM   3784  NE  ARG A 700     -37.441  -5.995 -41.042  1.00 47.64           N  
ATOM   3785  CZ  ARG A 700     -37.404  -5.368 -42.216  1.00 47.66           C  
ATOM   3786  NH1 ARG A 700     -37.068  -4.087 -42.292  1.00 47.65           N  
ATOM   3787  NH2 ARG A 700     -37.704  -6.030 -43.323  1.00 47.78           N  
ATOM   3788  N   SER A 701     -33.469  -3.024 -36.574  1.00 47.52           N  
ATOM   3789  CA  SER A 701     -33.021  -1.634 -36.512  1.00 47.66           C  
ATOM   3790  C   SER A 701     -31.546  -1.488 -36.898  1.00 47.75           C  
ATOM   3791  O   SER A 701     -31.194  -0.623 -37.699  1.00 47.71           O  
ATOM   3792  CB  SER A 701     -33.254  -1.061 -35.113  1.00 47.66           C  
ATOM   3793  OG  SER A 701     -32.884   0.306 -35.055  1.00 47.72           O  
ATOM   3794  N   GLU A 702     -30.698  -2.340 -36.325  1.00 47.90           N  
ATOM   3795  CA  GLU A 702     -29.258  -2.292 -36.568  1.00 48.04           C  
ATOM   3796  C   GLU A 702     -28.899  -2.890 -37.920  1.00 48.12           C  
ATOM   3797  O   GLU A 702     -27.903  -2.502 -38.528  1.00 48.13           O  
ATOM   3798  CB  GLU A 702     -28.491  -3.017 -35.458  1.00 48.05           C  
ATOM   3799  CG  GLU A 702     -28.767  -2.505 -34.043  1.00 48.19           C  
ATOM   3800  CD  GLU A 702     -28.373  -1.052 -33.838  1.00 48.31           C  
ATOM   3801  OE1 GLU A 702     -27.309  -0.635 -34.344  1.00 48.39           O  
ATOM   3802  OE2 GLU A 702     -29.129  -0.327 -33.156  1.00 48.33           O  
ATOM   3803  N   ILE A 703     -29.716  -3.835 -38.379  1.00 48.27           N  
ATOM   3804  CA  ILE A 703     -29.509  -4.495 -39.670  1.00 48.43           C  
ATOM   3805  C   ILE A 703     -29.677  -3.512 -40.832  1.00 48.55           C  
ATOM   3806  O   ILE A 703     -28.862  -3.487 -41.757  1.00 48.55           O  
ATOM   3807  CB  ILE A 703     -30.438  -5.736 -39.833  1.00 48.41           C  
ATOM   3808  CG1 ILE A 703     -29.895  -6.910 -39.012  1.00 48.40           C  
ATOM   3809  CG2 ILE A 703     -30.581  -6.146 -41.302  1.00 48.38           C  
ATOM   3810  CD1 ILE A 703     -30.935  -7.940 -38.638  1.00 48.39           C  
ATOM   3811  N   ALA A 704     -30.721  -2.692 -40.756  1.00 48.71           N  
ATOM   3812  CA  ALA A 704     -31.066  -1.767 -41.829  1.00 48.87           C  
ATOM   3813  C   ALA A 704     -30.046  -0.648 -42.023  1.00 49.01           C  
ATOM   3814  O   ALA A 704     -29.816  -0.214 -43.152  1.00 49.04           O  
ATOM   3815  CB  ALA A 704     -32.450  -1.187 -41.597  1.00 48.85           C  
ATOM   3816  N   GLN A 705     -29.430  -0.192 -40.933  1.00 49.20           N  
ATOM   3817  CA  GLN A 705     -28.572   0.998 -40.980  1.00 49.41           C  
ATOM   3818  C   GLN A 705     -27.095   0.771 -40.626  1.00 49.54           C  
ATOM   3819  O   GLN A 705     -26.212   1.315 -41.292  1.00 49.57           O  
ATOM   3820  CB  GLN A 705     -29.172   2.138 -40.142  1.00 49.42           C  
ATOM   3821  CG  GLN A 705     -29.406   1.807 -38.669  1.00 49.46           C  
ATOM   3822  CD  GLN A 705     -30.435   2.713 -38.009  1.00 49.55           C  
ATOM   3823  OE1 GLN A 705     -30.300   3.941 -38.003  1.00 49.48           O  
ATOM   3824  NE2 GLN A 705     -31.464   2.103 -37.429  1.00 49.64           N  
ATOM   3825  N   SER A 706     -26.832  -0.016 -39.584  1.00 49.73           N  
ATOM   3826  CA  SER A 706     -25.461  -0.263 -39.132  1.00 49.92           C  
ATOM   3827  C   SER A 706     -24.786  -1.343 -39.973  1.00 50.07           C  
ATOM   3828  O   SER A 706     -24.941  -2.535 -39.704  1.00 50.11           O  
ATOM   3829  CB  SER A 706     -25.437  -0.639 -37.644  1.00 49.90           C  
ATOM   3830  OG  SER A 706     -24.141  -1.036 -37.225  1.00 49.92           O  
ATOM   3831  N   ARG A 707     -24.031  -0.913 -40.983  1.00 50.25           N  
ATOM   3832  CA  ARG A 707     -23.314  -1.825 -41.882  1.00 50.45           C  
ATOM   3833  C   ARG A 707     -22.185  -2.599 -41.200  1.00 50.53           C  
ATOM   3834  O   ARG A 707     -21.686  -3.588 -41.743  1.00 50.54           O  
ATOM   3835  CB  ARG A 707     -22.770  -1.066 -43.101  1.00 50.47           C  
ATOM   3836  CG  ARG A 707     -23.686  -1.091 -44.323  1.00 50.74           C  
ATOM   3837  CD  ARG A 707     -23.579  -2.419 -45.080  1.00 51.18           C  
ATOM   3838  NE  ARG A 707     -24.715  -2.655 -45.974  1.00 51.60           N  
ATOM   3839  CZ  ARG A 707     -24.670  -2.566 -47.302  1.00 51.84           C  
ATOM   3840  NH1 ARG A 707     -23.536  -2.252 -47.921  1.00 51.92           N  
ATOM   3841  NH2 ARG A 707     -25.766  -2.801 -48.013  1.00 51.93           N  
ATOM   3842  N   HIS A 708     -21.793  -2.145 -40.012  1.00 50.65           N  
ATOM   3843  CA  HIS A 708     -20.707  -2.761 -39.258  1.00 50.79           C  
ATOM   3844  C   HIS A 708     -21.123  -4.102 -38.661  1.00 50.92           C  
ATOM   3845  O   HIS A 708     -20.405  -5.096 -38.782  1.00 50.97           O  
ATOM   3846  CB  HIS A 708     -20.225  -1.821 -38.150  1.00 50.78           C  
ATOM   3847  CG  HIS A 708     -19.717  -0.505 -38.650  1.00 50.80           C  
ATOM   3848  ND1 HIS A 708     -20.551   0.555 -38.936  1.00 50.81           N  
ATOM   3849  CD2 HIS A 708     -18.460  -0.076 -38.912  1.00 50.83           C  
ATOM   3850  CE1 HIS A 708     -19.830   1.579 -39.356  1.00 50.84           C  
ATOM   3851  NE2 HIS A 708     -18.558   1.223 -39.350  1.00 50.81           N  
ATOM   3852  N   TYR A 709     -22.292  -4.127 -38.030  1.00 51.05           N  
ATOM   3853  CA  TYR A 709     -22.739  -5.313 -37.311  1.00 51.22           C  
ATOM   3854  C   TYR A 709     -23.936  -6.033 -37.942  1.00 51.33           C  
ATOM   3855  O   TYR A 709     -24.373  -7.067 -37.429  1.00 51.36           O  
ATOM   3856  CB  TYR A 709     -23.047  -4.957 -35.856  1.00 51.22           C  
ATOM   3857  CG  TYR A 709     -21.829  -4.718 -34.996  1.00 51.23           C  
ATOM   3858  CD1 TYR A 709     -21.379  -3.426 -34.736  1.00 51.26           C  
ATOM   3859  CD2 TYR A 709     -21.134  -5.785 -34.431  1.00 51.26           C  
ATOM   3860  CE1 TYR A 709     -20.263  -3.203 -33.938  1.00 51.27           C  
ATOM   3861  CE2 TYR A 709     -20.017  -5.573 -33.636  1.00 51.23           C  
ATOM   3862  CZ  TYR A 709     -19.588  -4.281 -33.391  1.00 51.20           C  
ATOM   3863  OH  TYR A 709     -18.482  -4.074 -32.601  1.00 51.11           O  
ATOM   3864  N   GLN A 710     -24.458  -5.506 -39.049  1.00 51.46           N  
ATOM   3865  CA  GLN A 710     -25.615  -6.122 -39.713  1.00 51.59           C  
ATOM   3866  C   GLN A 710     -25.342  -7.563 -40.135  1.00 51.67           C  
ATOM   3867  O   GLN A 710     -26.262  -8.378 -40.192  1.00 51.66           O  
ATOM   3868  CB  GLN A 710     -26.105  -5.288 -40.903  1.00 51.58           C  
ATOM   3869  CG  GLN A 710     -25.129  -5.157 -42.062  1.00 51.63           C  
ATOM   3870  CD  GLN A 710     -25.728  -4.425 -43.248  1.00 51.69           C  
ATOM   3871  OE1 GLN A 710     -25.685  -4.915 -44.376  1.00 51.71           O  
ATOM   3872  NE2 GLN A 710     -26.290  -3.245 -43.000  1.00 51.71           N  
ATOM   3873  N   GLN A 711     -24.075  -7.864 -40.415  1.00 51.80           N  
ATOM   3874  CA  GLN A 711     -23.638  -9.220 -40.730  1.00 51.94           C  
ATOM   3875  C   GLN A 711     -23.993 -10.180 -39.598  1.00 52.02           C  
ATOM   3876  O   GLN A 711     -24.573 -11.239 -39.834  1.00 52.01           O  
ATOM   3877  CB  GLN A 711     -22.130  -9.249 -41.000  1.00 51.96           C  
ATOM   3878  CG  GLN A 711     -21.705  -8.560 -42.294  1.00 51.98           C  
ATOM   3879  CD  GLN A 711     -21.617  -9.509 -43.478  1.00 51.98           C  
ATOM   3880  OE1 GLN A 711     -20.582  -9.586 -44.138  1.00 52.09           O  
ATOM   3881  NE2 GLN A 711     -22.697 -10.237 -43.750  1.00 51.95           N  
ATOM   3882  N   ARG A 712     -23.662  -9.786 -38.371  1.00 52.15           N  
ATOM   3883  CA  ARG A 712     -23.898 -10.610 -37.191  1.00 52.30           C  
ATOM   3884  C   ARG A 712     -25.377 -10.687 -36.828  1.00 52.43           C  
ATOM   3885  O   ARG A 712     -25.923 -11.778 -36.656  1.00 52.45           O  
ATOM   3886  CB  ARG A 712     -23.093 -10.072 -36.008  1.00 52.27           C  
ATOM   3887  CG  ARG A 712     -23.114 -10.962 -34.783  1.00 52.30           C  
ATOM   3888  CD  ARG A 712     -22.343 -10.336 -33.638  1.00 52.30           C  
ATOM   3889  NE  ARG A 712     -20.907 -10.292 -33.900  1.00 52.24           N  
ATOM   3890  CZ  ARG A 712     -19.999  -9.823 -33.051  1.00 52.27           C  
ATOM   3891  NH1 ARG A 712     -20.365  -9.348 -31.866  1.00 52.16           N  
ATOM   3892  NH2 ARG A 712     -18.717  -9.827 -33.391  1.00 52.37           N  
ATOM   3893  N   PHE A 713     -26.014  -9.523 -36.718  1.00 52.62           N  
ATOM   3894  CA  PHE A 713     -27.409  -9.426 -36.292  1.00 52.79           C  
ATOM   3895  C   PHE A 713     -28.383 -10.156 -37.224  1.00 53.01           C  
ATOM   3896  O   PHE A 713     -29.358 -10.749 -36.756  1.00 53.02           O  
ATOM   3897  CB  PHE A 713     -27.822  -7.959 -36.118  1.00 52.71           C  
ATOM   3898  CG  PHE A 713     -27.298  -7.320 -34.857  1.00 52.49           C  
ATOM   3899  CD1 PHE A 713     -26.232  -6.435 -34.899  1.00 52.33           C  
ATOM   3900  CD2 PHE A 713     -27.880  -7.597 -33.627  1.00 52.30           C  
ATOM   3901  CE1 PHE A 713     -25.752  -5.839 -33.735  1.00 52.21           C  
ATOM   3902  CE2 PHE A 713     -27.407  -7.006 -32.460  1.00 52.14           C  
ATOM   3903  CZ  PHE A 713     -26.341  -6.127 -32.516  1.00 52.12           C  
ATOM   3904  N   ALA A 714     -28.109 -10.124 -38.530  1.00 53.28           N  
ATOM   3905  CA  ALA A 714     -28.949 -10.810 -39.518  1.00 53.53           C  
ATOM   3906  C   ALA A 714     -28.999 -12.320 -39.282  1.00 53.72           C  
ATOM   3907  O   ALA A 714     -30.060 -12.939 -39.397  1.00 53.70           O  
ATOM   3908  CB  ALA A 714     -28.479 -10.502 -40.931  1.00 53.50           C  
ATOM   3909  N   VAL A 715     -27.848 -12.895 -38.940  1.00 53.99           N  
ATOM   3910  CA  VAL A 715     -27.736 -14.319 -38.628  1.00 54.29           C  
ATOM   3911  C   VAL A 715     -28.551 -14.658 -37.375  1.00 54.55           C  
ATOM   3912  O   VAL A 715     -29.216 -15.695 -37.321  1.00 54.58           O  
ATOM   3913  CB  VAL A 715     -26.252 -14.750 -38.460  1.00 54.23           C  
ATOM   3914  CG1 VAL A 715     -26.144 -16.209 -38.059  1.00 54.21           C  
ATOM   3915  CG2 VAL A 715     -25.483 -14.512 -39.747  1.00 54.22           C  
ATOM   3916  N   ILE A 716     -28.512 -13.768 -36.384  1.00 54.88           N  
ATOM   3917  CA  ILE A 716     -29.247 -13.965 -35.133  1.00 55.18           C  
ATOM   3918  C   ILE A 716     -30.757 -13.851 -35.358  1.00 55.43           C  
ATOM   3919  O   ILE A 716     -31.538 -14.564 -34.723  1.00 55.42           O  
ATOM   3920  CB  ILE A 716     -28.788 -12.977 -34.027  1.00 55.16           C  
ATOM   3921  CG1 ILE A 716     -27.259 -12.987 -33.895  1.00 55.11           C  
ATOM   3922  CG2 ILE A 716     -29.439 -13.327 -32.686  1.00 55.13           C  
ATOM   3923  CD1 ILE A 716     -26.670 -11.725 -33.281  1.00 55.09           C  
ATOM   3924  N   LEU A 717     -31.156 -12.966 -36.271  1.00 55.78           N  
ATOM   3925  CA  LEU A 717     -32.571 -12.766 -36.597  1.00 56.14           C  
ATOM   3926  C   LEU A 717     -33.129 -13.959 -37.373  1.00 56.41           C  
ATOM   3927  O   LEU A 717     -34.232 -14.433 -37.086  1.00 56.46           O  
ATOM   3928  CB  LEU A 717     -32.780 -11.476 -37.403  1.00 56.10           C  
ATOM   3929  CG  LEU A 717     -34.032 -10.605 -37.192  1.00 56.07           C  
ATOM   3930  CD1 LEU A 717     -34.265  -9.724 -38.411  1.00 56.07           C  
ATOM   3931  CD2 LEU A 717     -35.302 -11.388 -36.873  1.00 56.12           C  
ATOM   3932  N   GLU A 718     -32.367 -14.437 -38.356  1.00 56.74           N  
ATOM   3933  CA  GLU A 718     -32.782 -15.585 -39.157  1.00 57.07           C  
ATOM   3934  C   GLU A 718     -33.015 -16.795 -38.262  1.00 57.29           C  
ATOM   3935  O   GLU A 718     -34.017 -17.496 -38.405  1.00 57.31           O  
ATOM   3936  CB  GLU A 718     -31.739 -15.913 -40.225  1.00 57.07           C  
ATOM   3937  CG  GLU A 718     -32.158 -17.025 -41.184  1.00 57.21           C  
ATOM   3938  CD  GLU A 718     -30.979 -17.703 -41.859  1.00 57.37           C  
ATOM   3939  OE1 GLU A 718     -29.831 -17.267 -41.642  1.00 57.47           O  
ATOM   3940  OE2 GLU A 718     -31.200 -18.679 -42.606  1.00 57.38           O  
ATOM   3941  N   ALA A 719     -32.094 -17.014 -37.327  1.00 57.61           N  
ATOM   3942  CA  ALA A 719     -32.189 -18.121 -36.382  1.00 57.93           C  
ATOM   3943  C   ALA A 719     -33.248 -17.875 -35.299  1.00 58.16           C  
ATOM   3944  O   ALA A 719     -33.329 -18.618 -34.319  1.00 58.22           O  
ATOM   3945  CB  ALA A 719     -30.829 -18.401 -35.763  1.00 57.91           C  
ATOM   3946  N   TYR A 720     -34.048 -16.827 -35.479  1.00 58.45           N  
ATOM   3947  CA  TYR A 720     -35.216 -16.591 -34.637  1.00 58.72           C  
ATOM   3948  C   TYR A 720     -36.503 -16.770 -35.442  1.00 58.98           C  
ATOM   3949  O   TYR A 720     -37.443 -17.424 -34.982  1.00 59.01           O  
ATOM   3950  CB  TYR A 720     -35.169 -15.201 -33.992  1.00 58.68           C  
ATOM   3951  CG  TYR A 720     -36.519 -14.714 -33.515  1.00 58.56           C  
ATOM   3952  CD1 TYR A 720     -37.053 -15.156 -32.307  1.00 58.48           C  
ATOM   3953  CD2 TYR A 720     -37.267 -13.824 -34.281  1.00 58.49           C  
ATOM   3954  CE1 TYR A 720     -38.295 -14.722 -31.873  1.00 58.58           C  
ATOM   3955  CE2 TYR A 720     -38.508 -13.384 -33.857  1.00 58.56           C  
ATOM   3956  CZ  TYR A 720     -39.017 -13.835 -32.653  1.00 58.64           C  
ATOM   3957  OH  TYR A 720     -40.249 -13.399 -32.230  1.00 58.71           O  
ATOM   3958  N   LEU A 721     -36.535 -16.187 -36.639  1.00 59.30           N  
ATOM   3959  CA  LEU A 721     -37.692 -16.290 -37.528  1.00 59.65           C  
ATOM   3960  C   LEU A 721     -38.004 -17.741 -37.886  1.00 59.95           C  
ATOM   3961  O   LEU A 721     -39.156 -18.093 -38.140  1.00 59.94           O  
ATOM   3962  CB  LEU A 721     -37.470 -15.465 -38.797  1.00 59.62           C  
ATOM   3963  CG  LEU A 721     -37.540 -13.937 -38.699  1.00 59.60           C  
ATOM   3964  CD1 LEU A 721     -36.834 -13.289 -39.878  1.00 59.55           C  
ATOM   3965  CD2 LEU A 721     -38.979 -13.444 -38.605  1.00 59.65           C  
ATOM   3966  N   ARG A 722     -36.966 -18.575 -37.889  1.00 60.38           N  
ATOM   3967  CA  ARG A 722     -37.096 -20.008 -38.144  1.00 60.80           C  
ATOM   3968  C   ARG A 722     -37.662 -20.763 -36.940  1.00 61.11           C  
ATOM   3969  O   ARG A 722     -37.784 -21.990 -36.974  1.00 61.14           O  
ATOM   3970  CB  ARG A 722     -35.737 -20.601 -38.532  1.00 60.77           C  
ATOM   3971  CG  ARG A 722     -35.258 -20.216 -39.919  1.00 60.84           C  
ATOM   3972  CD  ARG A 722     -33.836 -20.697 -40.164  1.00 60.97           C  
ATOM   3973  NE  ARG A 722     -33.422 -20.480 -41.549  1.00 60.99           N  
ATOM   3974  CZ  ARG A 722     -33.571 -21.368 -42.527  1.00 60.93           C  
ATOM   3975  NH1 ARG A 722     -34.123 -22.552 -42.285  1.00 61.00           N  
ATOM   3976  NH2 ARG A 722     -33.165 -21.072 -43.753  1.00 60.77           N  
ATOM   3977  N   GLY A 723     -38.009 -20.030 -35.884  1.00 61.48           N  
ATOM   3978  CA  GLY A 723     -38.496 -20.640 -34.651  1.00 61.95           C  
ATOM   3979  C   GLY A 723     -39.643 -19.918 -33.971  1.00 62.30           C  
ATOM   3980  O   GLY A 723     -40.208 -20.426 -33.001  1.00 62.32           O  
ATOM   3981  N   CYS A 724     -39.987 -18.733 -34.469  1.00 62.67           N  
ATOM   3982  CA  CYS A 724     -41.064 -17.934 -33.884  1.00 63.09           C  
ATOM   3983  C   CYS A 724     -42.451 -18.475 -34.237  1.00 63.36           C  
ATOM   3984  O   CYS A 724     -43.441 -18.147 -33.579  1.00 63.34           O  
ATOM   3985  CB  CYS A 724     -40.939 -16.472 -34.316  1.00 63.09           C  
ATOM   3986  SG  CYS A 724     -41.166 -16.184 -36.088  1.00 63.31           S  
ATOM   3987  N   GLY A 725     -42.510 -19.305 -35.275  1.00 63.73           N  
ATOM   3988  CA  GLY A 725     -43.763 -19.897 -35.728  1.00 64.25           C  
ATOM   3989  C   GLY A 725     -44.396 -19.090 -36.841  1.00 64.64           C  
ATOM   3990  O   GLY A 725     -44.158 -17.886 -36.954  1.00 64.67           O  
ATOM   3991  N   THR A 726     -45.212 -19.757 -37.655  1.00 65.06           N  
ATOM   3992  CA  THR A 726     -45.881 -19.127 -38.801  1.00 65.48           C  
ATOM   3993  C   THR A 726     -46.895 -18.052 -38.398  1.00 65.77           C  
ATOM   3994  O   THR A 726     -47.236 -17.183 -39.205  1.00 65.79           O  
ATOM   3995  CB  THR A 726     -46.576 -20.170 -39.709  1.00 65.46           C  
ATOM   3996  OG1 THR A 726     -47.335 -21.081 -38.904  1.00 65.55           O  
ATOM   3997  CG2 THR A 726     -45.549 -20.948 -40.524  1.00 65.47           C  
ATOM   3998  N   ALA A 727     -47.368 -18.118 -37.154  1.00 66.17           N  
ATOM   3999  CA  ALA A 727     -48.289 -17.121 -36.612  1.00 66.56           C  
ATOM   4000  C   ALA A 727     -47.659 -15.731 -36.623  1.00 66.86           C  
ATOM   4001  O   ALA A 727     -48.245 -14.779 -37.148  1.00 66.87           O  
ATOM   4002  CB  ALA A 727     -48.716 -17.502 -35.203  1.00 66.52           C  
ATOM   4003  N   MET A 728     -46.458 -15.630 -36.058  1.00 67.27           N  
ATOM   4004  CA  MET A 728     -45.735 -14.365 -35.992  1.00 67.68           C  
ATOM   4005  C   MET A 728     -45.047 -14.032 -37.310  1.00 68.00           C  
ATOM   4006  O   MET A 728     -44.926 -12.861 -37.667  1.00 68.02           O  
ATOM   4007  CB  MET A 728     -44.732 -14.370 -34.838  1.00 67.63           C  
ATOM   4008  CG  MET A 728     -45.391 -14.412 -33.467  1.00 67.66           C  
ATOM   4009  SD  MET A 728     -44.447 -13.585 -32.175  1.00 67.66           S  
ATOM   4010  CE  MET A 728     -43.128 -14.755 -31.896  1.00 67.81           C  
ATOM   4011  N   LEU A 729     -44.604 -15.065 -38.027  1.00 68.45           N  
ATOM   4012  CA  LEU A 729     -44.026 -14.904 -39.364  1.00 68.91           C  
ATOM   4013  C   LEU A 729     -45.003 -14.206 -40.304  1.00 69.25           C  
ATOM   4014  O   LEU A 729     -44.599 -13.422 -41.164  1.00 69.26           O  
ATOM   4015  CB  LEU A 729     -43.617 -16.258 -39.949  1.00 68.88           C  
ATOM   4016  CG  LEU A 729     -42.262 -16.853 -39.558  1.00 68.93           C  
ATOM   4017  CD1 LEU A 729     -42.246 -18.352 -39.822  1.00 68.93           C  
ATOM   4018  CD2 LEU A 729     -41.118 -16.162 -40.290  1.00 68.95           C  
ATOM   4019  N   HIS A 730     -46.288 -14.505 -40.131  1.00 69.72           N  
ATOM   4020  CA  HIS A 730     -47.353 -13.803 -40.834  1.00 70.21           C  
ATOM   4021  C   HIS A 730     -47.456 -12.360 -40.340  1.00 70.47           C  
ATOM   4022  O   HIS A 730     -47.557 -11.431 -41.144  1.00 70.50           O  
ATOM   4023  CB  HIS A 730     -48.688 -14.537 -40.656  1.00 70.25           C  
ATOM   4024  CG  HIS A 730     -49.892 -13.668 -40.855  1.00 70.55           C  
ATOM   4025  ND1 HIS A 730     -50.323 -13.264 -42.101  1.00 70.78           N  
ATOM   4026  CD2 HIS A 730     -50.757 -13.127 -39.964  1.00 70.81           C  
ATOM   4027  CE1 HIS A 730     -51.401 -12.510 -41.969  1.00 70.92           C  
ATOM   4028  NE2 HIS A 730     -51.684 -12.411 -40.682  1.00 70.97           N  
ATOM   4029  N   ASP A 731     -47.424 -12.187 -39.018  1.00 70.83           N  
ATOM   4030  CA  ASP A 731     -47.522 -10.867 -38.399  1.00 71.19           C  
ATOM   4031  C   ASP A 731     -46.406  -9.934 -38.861  1.00 71.43           C  
ATOM   4032  O   ASP A 731     -46.666  -8.780 -39.196  1.00 71.46           O  
ATOM   4033  CB  ASP A 731     -47.527 -10.980 -36.869  1.00 71.19           C  
ATOM   4034  CG  ASP A 731     -48.789 -11.635 -36.329  1.00 71.29           C  
ATOM   4035  OD1 ASP A 731     -49.728 -11.891 -37.116  1.00 71.40           O  
ATOM   4036  OD2 ASP A 731     -48.840 -11.894 -35.107  1.00 71.31           O  
ATOM   4037  N   PHE A 732     -45.174 -10.443 -38.892  1.00 71.78           N  
ATOM   4038  CA  PHE A 732     -44.017  -9.645 -39.305  1.00 72.13           C  
ATOM   4039  C   PHE A 732     -44.087  -9.230 -40.774  1.00 72.41           C  
ATOM   4040  O   PHE A 732     -43.668  -8.129 -41.128  1.00 72.44           O  
ATOM   4041  CB  PHE A 732     -42.698 -10.376 -39.021  1.00 72.09           C  
ATOM   4042  CG  PHE A 732     -42.385 -10.539 -37.554  1.00 72.02           C  
ATOM   4043  CD1 PHE A 732     -41.962 -11.766 -37.058  1.00 71.98           C  
ATOM   4044  CD2 PHE A 732     -42.506  -9.469 -36.671  1.00 71.95           C  
ATOM   4045  CE1 PHE A 732     -41.667 -11.928 -35.707  1.00 71.96           C  
ATOM   4046  CE2 PHE A 732     -42.216  -9.624 -35.317  1.00 71.92           C  
ATOM   4047  CZ  PHE A 732     -41.796 -10.856 -34.836  1.00 71.90           C  
ATOM   4048  N   THR A 733     -44.616 -10.112 -41.620  1.00 72.78           N  
ATOM   4049  CA  THR A 733     -44.800  -9.809 -43.042  1.00 73.15           C  
ATOM   4050  C   THR A 733     -45.801  -8.663 -43.209  1.00 73.41           C  
ATOM   4051  O   THR A 733     -45.589  -7.758 -44.019  1.00 73.40           O  
ATOM   4052  CB  THR A 733     -45.248 -11.058 -43.847  1.00 73.13           C  
ATOM   4053  OG1 THR A 733     -44.419 -12.177 -43.507  1.00 73.12           O  
ATOM   4054  CG2 THR A 733     -45.142 -10.806 -45.348  1.00 73.15           C  
ATOM   4055  N   GLN A 734     -46.876  -8.710 -42.422  1.00 73.81           N  
ATOM   4056  CA  GLN A 734     -47.877  -7.645 -42.377  1.00 74.21           C  
ATOM   4057  C   GLN A 734     -47.248  -6.333 -41.920  1.00 74.49           C  
ATOM   4058  O   GLN A 734     -47.487  -5.284 -42.516  1.00 74.53           O  
ATOM   4059  CB  GLN A 734     -49.026  -8.022 -41.434  1.00 74.19           C  
ATOM   4060  CG  GLN A 734     -49.861  -9.210 -41.886  1.00 74.35           C  
ATOM   4061  CD  GLN A 734     -50.952  -8.821 -42.860  1.00 74.57           C  
ATOM   4062  OE1 GLN A 734     -51.896  -8.117 -42.501  1.00 74.64           O  
ATOM   4063  NE2 GLN A 734     -50.834  -9.285 -44.100  1.00 74.67           N  
ATOM   4064  N   GLN A 735     -46.433  -6.410 -40.869  1.00 74.84           N  
ATOM   4065  CA  GLN A 735     -45.809  -5.234 -40.262  1.00 75.20           C  
ATOM   4066  C   GLN A 735     -44.739  -4.609 -41.151  1.00 75.52           C  
ATOM   4067  O   GLN A 735     -44.672  -3.386 -41.267  1.00 75.55           O  
ATOM   4068  CB  GLN A 735     -45.217  -5.586 -38.896  1.00 75.14           C  
ATOM   4069  CG  GLN A 735     -46.252  -5.920 -37.833  1.00 75.05           C  
ATOM   4070  CD  GLN A 735     -45.649  -6.585 -36.611  1.00 74.88           C  
ATOM   4071  OE1 GLN A 735     -44.675  -6.096 -36.038  1.00 74.80           O  
ATOM   4072  NE2 GLN A 735     -46.235  -7.704 -36.200  1.00 74.86           N  
ATOM   4073  N   VAL A 736     -43.912  -5.452 -41.770  1.00 75.96           N  
ATOM   4074  CA  VAL A 736     -42.830  -4.993 -42.649  1.00 76.40           C  
ATOM   4075  C   VAL A 736     -43.376  -4.265 -43.882  1.00 76.73           C  
ATOM   4076  O   VAL A 736     -42.874  -3.200 -44.251  1.00 76.76           O  
ATOM   4077  CB  VAL A 736     -41.873  -6.157 -43.054  1.00 76.37           C  
ATOM   4078  CG1 VAL A 736     -41.025  -5.790 -44.270  1.00 76.37           C  
ATOM   4079  CG2 VAL A 736     -40.975  -6.545 -41.885  1.00 76.37           C  
ATOM   4080  N   GLN A 737     -44.408  -4.837 -44.500  1.00 77.16           N  
ATOM   4081  CA  GLN A 737     -45.044  -4.240 -45.676  1.00 77.62           C  
ATOM   4082  C   GLN A 737     -45.607  -2.849 -45.391  1.00 77.97           C  
ATOM   4083  O   GLN A 737     -45.459  -1.937 -46.204  1.00 78.02           O  
ATOM   4084  CB  GLN A 737     -46.144  -5.153 -46.220  1.00 77.58           C  
ATOM   4085  CG  GLN A 737     -45.628  -6.320 -47.049  1.00 77.65           C  
ATOM   4086  CD  GLN A 737     -46.730  -7.267 -47.493  1.00 77.70           C  
ATOM   4087  OE1 GLN A 737     -47.887  -6.872 -47.648  1.00 77.71           O  
ATOM   4088  NE2 GLN A 737     -46.370  -8.528 -47.705  1.00 77.72           N  
ATOM   4089  N   VAL A 738     -46.237  -2.694 -44.228  1.00 78.42           N  
ATOM   4090  CA  VAL A 738     -46.840  -1.425 -43.828  1.00 78.86           C  
ATOM   4091  C   VAL A 738     -45.775  -0.356 -43.584  1.00 79.19           C  
ATOM   4092  O   VAL A 738     -45.848   0.733 -44.156  1.00 79.21           O  
ATOM   4093  CB  VAL A 738     -47.752  -1.593 -42.582  1.00 78.84           C  
ATOM   4094  CG1 VAL A 738     -48.192  -0.242 -42.035  1.00 78.86           C  
ATOM   4095  CG2 VAL A 738     -48.969  -2.447 -42.920  1.00 78.89           C  
ATOM   4096  N   ILE A 739     -44.780  -0.680 -42.758  1.00 79.66           N  
ATOM   4097  CA  ILE A 739     -43.743   0.287 -42.379  1.00 80.15           C  
ATOM   4098  C   ILE A 739     -42.855   0.715 -43.548  1.00 80.50           C  
ATOM   4099  O   ILE A 739     -42.356   1.837 -43.562  1.00 80.54           O  
ATOM   4100  CB  ILE A 739     -42.873  -0.187 -41.166  1.00 80.12           C  
ATOM   4101  CG1 ILE A 739     -42.076  -1.457 -41.487  1.00 80.16           C  
ATOM   4102  CG2 ILE A 739     -43.733  -0.383 -39.926  1.00 80.14           C  
ATOM   4103  CD1 ILE A 739     -40.629  -1.205 -41.878  1.00 80.21           C  
ATOM   4104  N   GLU A 740     -42.665  -0.174 -44.520  1.00 80.98           N  
ATOM   4105  CA  GLU A 740     -41.856   0.141 -45.697  1.00 81.45           C  
ATOM   4106  C   GLU A 740     -42.620   1.002 -46.700  1.00 81.83           C  
ATOM   4107  O   GLU A 740     -42.046   1.912 -47.301  1.00 81.87           O  
ATOM   4108  CB  GLU A 740     -41.325  -1.130 -46.363  1.00 81.40           C  
ATOM   4109  CG  GLU A 740     -40.113  -1.733 -45.656  1.00 81.46           C  
ATOM   4110  CD  GLU A 740     -39.572  -2.982 -46.337  1.00 81.51           C  
ATOM   4111  OE1 GLU A 740     -40.099  -3.370 -47.402  1.00 81.66           O  
ATOM   4112  OE2 GLU A 740     -38.613  -3.580 -45.804  1.00 81.44           O  
ATOM   4113  N   MET A 741     -43.911   0.713 -46.869  1.00 82.31           N  
ATOM   4114  CA  MET A 741     -44.779   1.487 -47.761  1.00 82.79           C  
ATOM   4115  C   MET A 741     -44.913   2.940 -47.307  1.00 83.12           C  
ATOM   4116  O   MET A 741     -44.825   3.865 -48.121  1.00 83.14           O  
ATOM   4117  CB  MET A 741     -46.164   0.840 -47.870  1.00 82.78           C  
ATOM   4118  CG  MET A 741     -46.241  -0.324 -48.849  1.00 82.94           C  
ATOM   4119  SD  MET A 741     -47.896  -1.042 -48.950  1.00 83.28           S  
ATOM   4120  CE  MET A 741     -47.631  -2.349 -50.149  1.00 83.09           C  
ATOM   4121  N   LEU A 742     -45.112   3.127 -46.004  1.00 83.57           N  
ATOM   4122  CA  LEU A 742     -45.297   4.454 -45.422  1.00 84.01           C  
ATOM   4123  C   LEU A 742     -44.005   5.266 -45.373  1.00 84.36           C  
ATOM   4124  O   LEU A 742     -44.040   6.492 -45.480  1.00 84.40           O  
ATOM   4125  CB  LEU A 742     -45.925   4.350 -44.028  1.00 83.97           C  
ATOM   4126  CG  LEU A 742     -47.389   3.896 -43.972  1.00 83.94           C  
ATOM   4127  CD1 LEU A 742     -47.759   3.430 -42.578  1.00 83.96           C  
ATOM   4128  CD2 LEU A 742     -48.334   4.997 -44.437  1.00 83.86           C  
ATOM   4129  N   GLN A 743     -42.873   4.581 -45.217  1.00 84.82           N  
ATOM   4130  CA  GLN A 743     -41.563   5.234 -45.225  1.00 85.29           C  
ATOM   4131  C   GLN A 743     -41.222   5.797 -46.600  1.00 85.62           C  
ATOM   4132  O   GLN A 743     -40.575   6.841 -46.704  1.00 85.66           O  
ATOM   4133  CB  GLN A 743     -40.466   4.276 -44.758  1.00 85.28           C  
ATOM   4134  CG  GLN A 743     -40.271   4.242 -43.249  1.00 85.37           C  
ATOM   4135  CD  GLN A 743     -39.277   3.181 -42.806  1.00 85.48           C  
ATOM   4136  OE1 GLN A 743     -39.399   2.006 -43.159  1.00 85.55           O  
ATOM   4137  NE2 GLN A 743     -38.290   3.590 -42.018  1.00 85.53           N  
ATOM   4138  N   LYS A 744     -41.657   5.100 -47.649  1.00 86.05           N  
ATOM   4139  CA  LYS A 744     -41.502   5.581 -49.022  1.00 86.48           C  
ATOM   4140  C   LYS A 744     -42.318   6.849 -49.231  1.00 86.79           C  
ATOM   4141  O   LYS A 744     -41.852   7.796 -49.864  1.00 86.81           O  
ATOM   4142  CB  LYS A 744     -41.921   4.508 -50.029  1.00 86.46           C  
ATOM   4143  CG  LYS A 744     -40.925   3.369 -50.169  1.00 86.53           C  
ATOM   4144  CD  LYS A 744     -41.315   2.415 -51.287  1.00 86.60           C  
ATOM   4145  CE  LYS A 744     -40.267   1.325 -51.462  1.00 86.68           C  
ATOM   4146  NZ  LYS A 744     -40.470   0.547 -52.718  1.00 86.70           N  
ATOM   4147  N   VAL A 745     -43.530   6.854 -48.679  1.00 87.21           N  
ATOM   4148  CA  VAL A 745     -44.419   8.012 -48.709  1.00 87.62           C  
ATOM   4149  C   VAL A 745     -43.828   9.172 -47.901  1.00 87.96           C  
ATOM   4150  O   VAL A 745     -43.911  10.330 -48.317  1.00 87.98           O  
ATOM   4151  CB  VAL A 745     -45.835   7.639 -48.191  1.00 87.58           C  
ATOM   4152  CG1 VAL A 745     -46.732   8.866 -48.086  1.00 87.58           C  
ATOM   4153  CG2 VAL A 745     -46.473   6.598 -49.102  1.00 87.59           C  
ATOM   4154  N   THR A 746     -43.220   8.847 -46.761  1.00 88.44           N  
ATOM   4155  CA  THR A 746     -42.574   9.836 -45.894  1.00 88.91           C  
ATOM   4156  C   THR A 746     -41.472  10.591 -46.633  1.00 89.29           C  
ATOM   4157  O   THR A 746     -41.403  11.817 -46.565  1.00 89.30           O  
ATOM   4158  CB  THR A 746     -41.989   9.178 -44.621  1.00 88.87           C  
ATOM   4159  OG1 THR A 746     -43.008   8.422 -43.958  1.00 88.87           O  
ATOM   4160  CG2 THR A 746     -41.443  10.228 -43.660  1.00 88.88           C  
ATOM   4161  N   LEU A 747     -40.625   9.849 -47.344  1.00 89.83           N  
ATOM   4162  CA  LEU A 747     -39.502  10.428 -48.084  1.00 90.35           C  
ATOM   4163  C   LEU A 747     -39.945  11.158 -49.353  1.00 90.74           C  
ATOM   4164  O   LEU A 747     -39.258  12.070 -49.816  1.00 90.77           O  
ATOM   4165  CB  LEU A 747     -38.463   9.352 -48.424  1.00 90.32           C  
ATOM   4166  CG  LEU A 747     -37.681   8.713 -47.268  1.00 90.30           C  
ATOM   4167  CD1 LEU A 747     -37.111   7.364 -47.684  1.00 90.26           C  
ATOM   4168  CD2 LEU A 747     -36.574   9.631 -46.760  1.00 90.27           C  
ATOM   4169  N   ASP A 748     -41.084  10.747 -49.909  1.00 91.26           N  
ATOM   4170  CA  ASP A 748     -41.656  11.396 -51.091  1.00 91.77           C  
ATOM   4171  C   ASP A 748     -42.260  12.757 -50.749  1.00 92.14           C  
ATOM   4172  O   ASP A 748     -42.021  13.742 -51.450  1.00 92.15           O  
ATOM   4173  CB  ASP A 748     -42.711  10.499 -51.752  1.00 91.74           C  
ATOM   4174  CG  ASP A 748     -42.105   9.303 -52.470  1.00 91.81           C  
ATOM   4175  OD1 ASP A 748     -40.942   9.386 -52.919  1.00 91.85           O  
ATOM   4176  OD2 ASP A 748     -42.801   8.272 -52.590  1.00 91.89           O  
ATOM   4177  N   ILE A 749     -43.038  12.798 -49.669  1.00 92.63           N  
ATOM   4178  CA  ILE A 749     -43.682  14.025 -49.201  1.00 93.14           C  
ATOM   4179  C   ILE A 749     -42.662  15.037 -48.665  1.00 93.51           C  
ATOM   4180  O   ILE A 749     -42.790  16.240 -48.907  1.00 93.57           O  
ATOM   4181  CB  ILE A 749     -44.810  13.715 -48.163  1.00 93.11           C  
ATOM   4182  CG1 ILE A 749     -46.168  13.586 -48.861  1.00 93.13           C  
ATOM   4183  CG2 ILE A 749     -44.914  14.793 -47.086  1.00 93.15           C  
ATOM   4184  CD1 ILE A 749     -46.385  12.279 -49.596  1.00 93.19           C  
ATOM   4185  N   LYS A 750     -41.644  14.540 -47.964  1.00 94.00           N  
ATOM   4186  CA  LYS A 750     -40.590  15.387 -47.399  1.00 94.49           C  
ATOM   4187  C   LYS A 750     -39.775  16.073 -48.496  1.00 94.83           C  
ATOM   4188  O   LYS A 750     -39.275  17.184 -48.305  1.00 94.86           O  
ATOM   4189  CB  LYS A 750     -39.672  14.560 -46.493  1.00 94.49           C  
ATOM   4190  CG  LYS A 750     -38.904  15.363 -45.450  1.00 94.53           C  
ATOM   4191  CD  LYS A 750     -38.112  14.440 -44.531  1.00 94.55           C  
ATOM   4192  CE  LYS A 750     -37.467  15.198 -43.380  1.00 94.57           C  
ATOM   4193  NZ  LYS A 750     -36.312  16.040 -43.799  1.00 94.62           N  
ATOM   4194  N   SER A 751     -39.653  15.403 -49.640  1.00 95.27           N  
ATOM   4195  CA  SER A 751     -38.946  15.943 -50.799  1.00 95.72           C  
ATOM   4196  C   SER A 751     -39.758  17.018 -51.527  1.00 96.05           C  
ATOM   4197  O   SER A 751     -39.202  18.023 -51.976  1.00 96.08           O  
ATOM   4198  CB  SER A 751     -38.572  14.819 -51.771  1.00 95.69           C  
ATOM   4199  OG  SER A 751     -37.642  13.923 -51.186  1.00 95.75           O  
ATOM   4200  N   LEU A 752     -41.071  16.808 -51.622  1.00 96.47           N  
ATOM   4201  CA  LEU A 752     -41.966  17.704 -52.366  1.00 96.89           C  
ATOM   4202  C   LEU A 752     -42.199  19.062 -51.691  1.00 97.19           C  
ATOM   4203  O   LEU A 752     -43.166  19.763 -52.005  1.00 97.23           O  
ATOM   4204  CB  LEU A 752     -43.305  17.007 -52.656  1.00 96.87           C  
ATOM   4205  CG  LEU A 752     -43.313  15.880 -53.697  1.00 96.91           C  
ATOM   4206  CD1 LEU A 752     -44.534  14.987 -53.517  1.00 96.93           C  
ATOM   4207  CD2 LEU A 752     -43.240  16.422 -55.125  1.00 96.92           C  
ATOM   4208  N   SER A 753     -41.304  19.428 -50.773  1.00 97.59           N  
ATOM   4209  CA  SER A 753     -41.350  20.724 -50.096  1.00 98.00           C  
ATOM   4210  C   SER A 753     -39.960  21.165 -49.639  1.00 98.29           C  
ATOM   4211  O   SER A 753     -39.078  20.334 -49.407  1.00 98.31           O  
ATOM   4212  CB  SER A 753     -42.301  20.679 -48.897  1.00 97.98           C  
ATOM   4213  OG  SER A 753     -41.835  19.774 -47.913  1.00 98.06           O  
ATOM   4214  N   ALA A 754     -39.784  22.478 -49.503  1.00 98.67           N  
ATOM   4215  CA  ALA A 754     -38.513  23.065 -49.076  1.00 99.05           C  
ATOM   4216  C   ALA A 754     -38.244  22.851 -47.584  1.00 99.34           C  
ATOM   4217  O   ALA A 754     -39.081  22.297 -46.864  1.00 99.36           O  
ATOM   4218  CB  ALA A 754     -38.476  24.551 -49.423  1.00 99.03           C  
ATOM   4219  N   GLU A 755     -37.068  23.289 -47.134  1.00 99.71           N  
ATOM   4220  CA  GLU A 755     -36.659  23.163 -45.735  1.00100.07           C  
ATOM   4221  C   GLU A 755     -37.478  24.072 -44.813  1.00100.29           C  
ATOM   4222  O   GLU A 755     -37.807  23.689 -43.685  1.00100.33           O  
ATOM   4223  CB  GLU A 755     -35.158  23.453 -45.588  1.00100.06           C  
ATOM   4224  CG  GLU A 755     -34.570  23.154 -44.203  1.00100.21           C  
ATOM   4225  CD  GLU A 755     -34.657  21.683 -43.816  1.00100.40           C  
ATOM   4226  OE1 GLU A 755     -35.045  21.393 -42.663  1.00100.49           O  
ATOM   4227  OE2 GLU A 755     -34.341  20.818 -44.662  1.00100.46           O  
ATOM   4228  N   LYS A 756     -37.803  25.267 -45.305  1.00100.55           N  
ATOM   4229  CA  LYS A 756     -38.582  26.243 -44.547  1.00100.82           C  
ATOM   4230  C   LYS A 756     -40.010  25.751 -44.306  1.00101.01           C  
ATOM   4231  O   LYS A 756     -40.649  25.202 -45.210  1.00101.01           O  
ATOM   4232  CB  LYS A 756     -38.594  27.593 -45.269  1.00100.81           C  
ATOM   4233  CG  LYS A 756     -38.901  28.783 -44.370  1.00100.86           C  
ATOM   4234  CD  LYS A 756     -38.648  30.099 -45.090  1.00100.90           C  
ATOM   4235  CE  LYS A 756     -38.768  31.283 -44.140  1.00100.92           C  
ATOM   4236  NZ  LYS A 756     -38.427  32.572 -44.804  1.00100.88           N  
ATOM   4237  N   TYR A 757     -40.492  25.946 -43.079  1.00101.25           N  
ATOM   4238  CA  TYR A 757     -41.845  25.552 -42.684  1.00101.49           C  
ATOM   4239  C   TYR A 757     -42.907  26.407 -43.374  1.00101.59           C  
ATOM   4240  O   TYR A 757     -42.798  27.636 -43.425  1.00101.60           O  
ATOM   4241  CB  TYR A 757     -42.010  25.615 -41.158  1.00101.51           C  
ATOM   4242  CG  TYR A 757     -41.599  26.936 -40.538  1.00101.69           C  
ATOM   4243  CD1 TYR A 757     -42.537  27.943 -40.307  1.00101.77           C  
ATOM   4244  CD2 TYR A 757     -40.270  27.176 -40.179  1.00101.87           C  
ATOM   4245  CE1 TYR A 757     -42.164  29.159 -39.740  1.00101.85           C  
ATOM   4246  CE2 TYR A 757     -39.886  28.389 -39.612  1.00101.95           C  
ATOM   4247  CZ  TYR A 757     -40.838  29.374 -39.395  1.00101.93           C  
ATOM   4248  OH  TYR A 757     -40.468  30.574 -38.832  1.00101.90           O  
ATOM   4249  N   ASP A 758     -43.924  25.739 -43.911  1.00101.74           N  
ATOM   4250  CA  ASP A 758     -45.020  26.404 -44.612  1.00101.88           C  
ATOM   4251  C   ASP A 758     -46.266  25.525 -44.673  1.00101.98           C  
ATOM   4252  O   ASP A 758     -47.335  25.935 -44.215  1.00102.01           O  
ATOM   4253  CB  ASP A 758     -44.594  26.850 -46.023  1.00101.88           C  
ATOM   4254  CG  ASP A 758     -43.738  25.812 -46.748  1.00101.91           C  
ATOM   4255  OD1 ASP A 758     -43.821  24.605 -46.427  1.00101.88           O  
ATOM   4256  OD2 ASP A 758     -42.978  26.210 -47.655  1.00101.98           O  
ATOM   4257  N   VAL A 759     -46.108  24.317 -45.220  1.00102.09           N  
ATOM   4258  CA  VAL A 759     -47.201  23.351 -45.421  1.00102.20           C  
ATOM   4259  C   VAL A 759     -48.338  23.940 -46.267  1.00102.29           C  
ATOM   4260  O   VAL A 759     -49.182  24.694 -45.769  1.00102.29           O  
ATOM   4261  CB  VAL A 759     -47.741  22.755 -44.077  1.00102.19           C  
ATOM   4262  CG1 VAL A 759     -48.819  21.709 -44.337  1.00102.17           C  
ATOM   4263  CG2 VAL A 759     -46.612  22.145 -43.265  1.00102.17           C  
ATOM   4264  N   SER A 760     -48.347  23.589 -47.549  1.00102.40           N  
ATOM   4265  CA  SER A 760     -49.370  24.065 -48.474  1.00102.49           C  
ATOM   4266  C   SER A 760     -50.377  22.967 -48.801  1.00102.57           C  
ATOM   4267  O   SER A 760     -50.132  21.789 -48.531  1.00102.57           O  
ATOM   4268  CB  SER A 760     -48.722  24.589 -49.759  1.00102.49           C  
ATOM   4269  OG  SER A 760     -47.984  23.569 -50.411  1.00102.45           O  
ATOM   4270  N   SER A 761     -51.506  23.363 -49.387  1.00102.67           N  
ATOM   4271  CA  SER A 761     -52.550  22.424 -49.801  1.00102.75           C  
ATOM   4272  C   SER A 761     -52.031  21.423 -50.830  1.00102.80           C  
ATOM   4273  O   SER A 761     -52.584  20.333 -50.973  1.00102.80           O  
ATOM   4274  CB  SER A 761     -53.765  23.174 -50.355  1.00102.75           C  
ATOM   4275  OG  SER A 761     -53.407  23.983 -51.463  1.00102.77           O  
ATOM   4276  N   GLN A 762     -50.966  21.810 -51.532  1.00102.88           N  
ATOM   4277  CA  GLN A 762     -50.289  20.953 -52.503  1.00102.95           C  
ATOM   4278  C   GLN A 762     -49.800  19.658 -51.852  1.00102.98           C  
ATOM   4279  O   GLN A 762     -50.199  18.566 -52.259  1.00102.97           O  
ATOM   4280  CB  GLN A 762     -49.116  21.705 -53.146  1.00102.95           C  
ATOM   4281  CG  GLN A 762     -48.391  20.939 -54.253  1.00102.98           C  
ATOM   4282  CD  GLN A 762     -47.094  21.605 -54.693  1.00102.99           C  
ATOM   4283  OE1 GLN A 762     -46.862  22.787 -54.436  1.00103.01           O  
ATOM   4284  NE2 GLN A 762     -46.242  20.841 -55.366  1.00103.02           N  
ATOM   4285  N   VAL A 763     -48.955  19.795 -50.832  1.00103.02           N  
ATOM   4286  CA  VAL A 763     -48.371  18.648 -50.135  1.00103.05           C  
ATOM   4287  C   VAL A 763     -49.413  17.889 -49.298  1.00103.08           C  
ATOM   4288  O   VAL A 763     -49.257  16.696 -49.037  1.00103.08           O  
ATOM   4289  CB  VAL A 763     -47.124  19.065 -49.292  1.00103.05           C  
ATOM   4290  CG1 VAL A 763     -47.524  19.796 -48.010  1.00103.04           C  
ATOM   4291  CG2 VAL A 763     -46.244  17.861 -48.986  1.00103.07           C  
ATOM   4292  N   ILE A 764     -50.475  18.589 -48.899  1.00103.12           N  
ATOM   4293  CA  ILE A 764     -51.596  17.981 -48.180  1.00103.18           C  
ATOM   4294  C   ILE A 764     -52.433  17.113 -49.124  1.00103.20           C  
ATOM   4295  O   ILE A 764     -52.809  15.993 -48.774  1.00103.19           O  
ATOM   4296  CB  ILE A 764     -52.485  19.056 -47.477  1.00103.18           C  
ATOM   4297  CG1 ILE A 764     -51.710  19.773 -46.355  1.00103.19           C  
ATOM   4298  CG2 ILE A 764     -53.797  18.451 -46.955  1.00103.19           C  
ATOM   4299  CD1 ILE A 764     -51.335  18.904 -45.145  1.00103.15           C  
ATOM   4300  N   SER A 765     -52.710  17.635 -50.319  1.00103.25           N  
ATOM   4301  CA  SER A 765     -53.442  16.895 -51.348  1.00103.29           C  
ATOM   4302  C   SER A 765     -52.617  15.729 -51.889  1.00103.31           C
[truncated: 204,526 more chars]
