# Supplementary material for: Isoliquiritigenin Inhibits the Growth of Colorectal Cancer Cells through the ESR2/PI3K/AKT Signalling Pathway
Source: Pharmaceuticals (Basel). 2023 Dec 27;17(1):43. doi: 10.3390/ph17010043 (PMC10820227; doi:10.3390/ph17010043)
Supplement: Supplementary file 1 [file pharmaceuticals-17-00043-s001.zip › crystal structures/PI3KCG/OW7.pdb]

HETATM    1  N1  0W7 A1201     -43.805  14.794 -31.231  1.00 94.10           N  
HETATM    2  C2  0W7 A1201     -42.758  15.511 -31.705  1.00 94.17           C  
HETATM    3  N3  0W7 A1201     -41.502  14.997 -31.672  1.00 94.15           N  
HETATM    4  C4  0W7 A1201     -41.282  13.763 -31.153  1.00 94.12           C  
HETATM    5  C5  0W7 A1201     -42.345  13.018 -30.660  1.00 94.07           C  
HETATM    6  C6  0W7 A1201     -43.629  13.559 -30.701  1.00 94.04           C  
HETATM    7  N7  0W7 A1201     -44.729  12.819 -30.210  1.00 93.99           N  
HETATM    8  C8  0W7 A1201     -45.962  13.627 -30.254  1.00 93.97           C  
HETATM    9  C9  0W7 A1201     -47.138  12.816 -29.716  1.00 93.99           C  
HETATM   10  O10 0W7 A1201     -46.846  12.346 -28.397  1.00 94.04           O  
HETATM   11  C11 0W7 A1201     -45.666  11.541 -28.323  1.00 94.05           C  
HETATM   12  C12 0W7 A1201     -44.467  12.331 -28.841  1.00 94.00           C  
HETATM   13  C13 0W7 A1201     -43.017  16.881 -32.289  1.00 94.25           C  
HETATM   14  C14 0W7 A1201     -43.606  16.646 -33.658  1.00 94.33           C  
HETATM   15  N15 0W7 A1201     -44.942  16.701 -33.745  1.00 94.32           N  
HETATM   16  C16 0W7 A1201     -45.664  16.497 -34.937  1.00 94.32           C  
HETATM   17  O17 0W7 A1201     -42.851  16.403 -34.588  1.00 94.42           O  
HETATM   18  O18 0W7 A1201     -40.131  13.281 -31.118  1.00 94.09           O  
HETATM   19  C19 0W7 A1201     -47.056  16.583 -34.922  1.00 94.30           C  
HETATM   20  C20 0W7 A1201     -47.779  16.386 -36.100  1.00 94.29           C  
HETATM   21  C21 0W7 A1201     -47.129  16.096 -37.297  1.00 94.31           C  
HETATM   22  C22 0W7 A1201     -45.742  16.011 -37.316  1.00 94.34           C  
HETATM   23  C23 0W7 A1201     -45.019  16.210 -36.142  1.00 94.32           C  
CONECT    1    2    6
CONECT    2    1    3   13
CONECT    3    2    4
CONECT    4    3    5   18
CONECT    5    4    6
CONECT    6    1    5    7
CONECT    7    6    8   12
CONECT    8    7    9
CONECT    9    8   10
CONECT   10    9   11
CONECT   11   10   12
CONECT   12    7   11
CONECT   13    2   14
CONECT   14   13   15   17
CONECT   15   14   16
CONECT   16   15   19   23
CONECT   17   14
CONECT   18    4
CONECT   19   16   20
CONECT   20   19   21
CONECT   21   20   22
CONECT   22   21   23
CONECT   23   16   22
END
