# Supplementary material for: Isoliquiritigenin Inhibits the Growth of Colorectal Cancer Cells through the ESR2/PI3K/AKT Signalling Pathway
Source: Pharmaceuticals (Basel). 2023 Dec 27;17(1):43. doi: 10.3390/ph17010043 (PMC10820227; doi:10.3390/ph17010043)
Supplement: Supplementary file 1 [file pharmaceuticals-17-00043-s001.zip › Table S1. Supplementary Materials for molecular docking.xlsx]

## Sheet: Sheet1
TABLE S3 | the parameter settings for the grid box.
molecule	Protein	ligand	the grid box
ESR2	7xvz	I1D	center_X	-29.278
			center_Y	-8.481
			center_Z	-30.358
			size_X	15
			size_Y	15
			size_Z	15
molecule	Protein	ligand	the grid box
PI3KCG	4g11	OW7	center_X	-43.955
			center_Y	14.211
			center_Z	-32.82
			size_X	15
			size_Y	15
			size_Z	15
molecule	Protein	ligand	the grid box
GSK3β	5f94	3UO	center_X	-2.985
			center_Y	4.426
			center_Z	34.474
			size_X	15
			size_Y	15
			size_Z	15
