# Supplementary material for: Isoliquiritigenin Inhibits the Growth of Colorectal Cancer Cells through the ESR2/PI3K/AKT Signalling Pathway
Source: Pharmaceuticals (Basel). 2023 Dec 27;17(1):43. doi: 10.3390/ph17010043 (PMC10820227; doi:10.3390/ph17010043)
Supplement: Supplementary file 1 [file pharmaceuticals-17-00043-s001.zip › Table S2. Supplementary Materials for Network Pharmacology.xlsx]

## Sheet: Isoliquiritigenin targets
TABLE S1 | 31 pharmacological targets of ISL (ISL target, iT) from TCMSP.
Molecule name	Related targets	Datebase	Gene symbol
isoliquiritigenin	Prostaglandin G/H synthase 1	TCMSP	PTGS1
isoliquiritigenin	Estrogen receptor	TCMSP	ESR1
isoliquiritigenin	Peroxisome proliferator activated receptor gamma	TCMSP	PPARG
isoliquiritigenin	Prostaglandin G/H synthase 2	TCMSP	PTGS2
isoliquiritigenin	Carbonic anhydrase II	TCMSP	CA2
isoliquiritigenin	Beta-2 adrenergic receptor	TCMSP	ADRB2
isoliquiritigenin	Estrogen receptor beta	TCMSP	ESR2
isoliquiritigenin	Mitogen-activated protein kinase 14	TCMSP	MAPK14
isoliquiritigenin	Glycogen synthase kinase-3 beta	TCMSP	GSK3B
isoliquiritigenin	Heat shock protein HSP 90	TCMSP	HSP90AA1
isoliquiritigenin	Cell division protein kinase 2	TCMSP	HSP90AB1
isoliquiritigenin	Amine oxidase [flavin-containing] B	TCMSP	CDK2
isoliquiritigenin	mRNA of PKA Catalytic Subunit C-alpha	TCMSP	MAOB
isoliquiritigenin	cAMP-dependent protein kinase inhibitor alpha	TCMSP	PKIA
isoliquiritigenin	Nitric oxide synthase, inducible	TCMSP	NOS2
isoliquiritigenin	Androgen receptor	TCMSP	AR
isoliquiritigenin	Phosphatidylinositol-4,5-bisphosphate 3-kinase catalytic subunit, gamma isoform	TCMSP	PIK3CG
isoliquiritigenin	Beta-lactamase	TCMSP	DPEP1
isoliquiritigenin	Proto-oncogene serine/threonine-protein kinase Pim-1	TCMSP	PIM1
isoliquiritigenin	Cyclin-A2	TCMSP	CCNA2
isoliquiritigenin	Nuclear receptor coactivator 2	TCMSP	NCOA2
isoliquiritigenin	Proto-oncogene c-Fos	TCMSP	FOS
isoliquiritigenin	Apoptosis regulator BAX	TCMSP	BAX
isoliquiritigenin	E-selectin	TCMSP	SELE
isoliquiritigenin	Vascular cell adhesion protein 1	TCMSP	VCAM1
isoliquiritigenin	Gamma-aminobutyric acid type B receptor subunit 1	TCMSP	GABBR1
isoliquiritigenin	Tyrosinase	TCMSP	TYR
isoliquiritigenin	Junctional adhesion molecule A	TCMSP	F11R
isoliquiritigenin	Tyrosine-protein kinase JAK2	TCMSP	JAK2
isoliquiritigenin	Metallothionein-2	TCMSP	MT2A
isoliquiritigenin	Solute carrier family 2, facilitated glucose transporter member 1	TCMSP	SLC2A1

## Sheet: CRC targets
TABLE S2 | 2541 gastrointestinal disease (disease targets, dT) from DisGeNET.
Disease	Disease_id	Gene	Gene_id	UniProt	Gene_Full_Name	Protein_Class	N_diseases_g	DSI_g	DPI_g	pLI	Score_gda	EL_gda	EI_gda	N_PMIDs	N_SNPs_gda	First_Ref	Last_Ref
Colorectal Carcinoma	C0009402	APC	324	P25054	APC regulator of WNT signaling pathway		703	0.373	0.962	1	0.8	strong	0.972	359	34	1990	2020
Colorectal Carcinoma	C0009402	MLH1	4292	P40692	mutL homolog 1	Nucleic acid binding	526	0.399	0.808	3.41e-05	0.8	strong	0.973	485	32	1993	2020
Colorectal Carcinoma	C0009402	MSH2	4436	P43246	mutS homolog 2	Nucleic acid binding	490	0.406	0.808	0.89539	0.8	strong	0.971	277	18	1993	2020
Colorectal Carcinoma	C0009402	NRAS	4893	P01111	NRAS proto-oncogene, GTPase	Enzyme modulator	611	0.39	0.808	0.49009	0.8	strong	0.966	59	6	1993	2020
Colorectal Carcinoma	C0009402	CHEK2	11200	O96017	checkpoint kinase 2	Kinase	297	0.46	0.808	1.2103e-24	0.7	limited	0.885	26	5	2003	2019
Colorectal Carcinoma	C0009402	CTNNB1	1499	P35222	catenin beta 1		1368	0.303	0.885	0.99999	0.7		0.983	469	8	1997	2020
Colorectal Carcinoma	C0009402	DCC	1630	P43146	DCC netrin 1 receptor		279	0.471	0.808	0.99448	0.7		0.946	56	3	1990	2019
Colorectal Carcinoma	C0009402	SMAD3	4088	P84022	SMAD family member 3	Transcription factor	470	0.415	0.923	0.79796	0.7		0.941	17	1	1998	2019
Colorectal Carcinoma	C0009402	SMAD4	4089	Q13485	SMAD family member 4	Transcription factor	575	0.401	0.808	0.99881	0.7	strong	0.981	103	3	1996	2020
Colorectal Carcinoma	C0009402	MMP2	4313	P08253	matrix metallopeptidase 2	Enzyme	1021	0.333	0.923	0.83878	0.7		1	46	4	1992	2019
Colorectal Carcinoma	C0009402	PIK3CA	5290	P42336	phosphatidylinositol-4,5-bisphosphate 3-kinase catalytic subunit alpha	Kinase	1511	0.292	0.923	1	0.7		0.985	266	13	2002	2020
Colorectal Carcinoma	C0009402	BRAF	673	P15056	B-Raf proto-oncogene, serine/threonine kinase	Kinase	1228	0.319	0.846	0.99995	0.7		0.976	622	10	2002	2020
Colorectal Carcinoma	C0009402	TCF7L2	6934	Q9NQB0	transcription factor 7 like 2		257	0.485	0.846	0.99537	0.7		0.925	40	5	1999	2019
Colorectal Carcinoma	C0009402	BUB1	699	O43683	BUB1 mitotic checkpoint serine/threonine kinase	Kinase	162	0.528	0.731	4.8813e-09	0.7		1	10	4	2000	2018
Colorectal Carcinoma	C0009402	TP53	7157	P04637	tumor protein p53	Transcription factor	2494	0.236	0.962	0.53235	0.7		0.947	665	19	1989	2020
Colorectal Carcinoma	C0009402	FGFR3	2261	P22607	fibroblast growth factor receptor 3	Kinase	654	0.391	0.846	1.6432e-05	0.66		1	6	8	2000	2018
Colorectal Carcinoma	C0009402	EP300	2033	Q09472	E1A binding protein p300		345	0.459	0.846	1	0.64		1	5	4	1996	2017
Colorectal Carcinoma	C0009402	KLF5	688	Q13887	Kruppel like factor 5	Nucleic acid binding	143	0.534	0.769	0.8181	0.64		1	6	2	2011	2019
Colorectal Carcinoma	C0009402	AKT1	207	P31749	AKT serine/threonine kinase 1	Kinase	1250	0.311	0.962	0.9759	0.6	limited	0.984	123	1	2002	2020
Colorectal Carcinoma	C0009402	MSH6	2956	P52701	mutS homolog 6	Nucleic acid binding	296	0.462	0.731	3.6705e-05	0.6	strong	0.974	114	36	1988	2020
Colorectal Carcinoma	C0009402	IGFBP3	3486	P17936	insulin like growth factor binding protein 3	Enzyme modulator	350	0.439	0.808	0.91029	0.6		0.815	27	4	2004	2019
Colorectal Carcinoma	C0009402	KDR	3791	P35968	kinase insert domain receptor	Kinase	623	0.378	0.885	0.99982	0.6		0.964	28	0	2002	2019
Colorectal Carcinoma	C0009402	KRAS	3845	P01116	KRAS proto-oncogene, GTPase	Enzyme modulator	1213	0.32	0.923	0.00078803	0.6		0.963	1007	13	1990	2020
Colorectal Carcinoma	C0009402	ABCB1	5243	P08183	ATP binding cassette subfamily B member 1	Transporter	933	0.344	0.885	1.2564e-05	0.6		0.96	75	7	1990	2020
Colorectal Carcinoma	C0009402	POLD1	5424	P28340	DNA polymerase delta 1, catalytic subunit		189	0.507	0.769	2.4179e-06	0.6	strong	0.944	18	3	1995	2020
Colorectal Carcinoma	C0009402	POLE	5426	Q07864	DNA polymerase epsilon, catalytic subunit		151	0.526	0.731	8.0488e-27	0.6	strong	1	28	5	2013	2020
Colorectal Carcinoma	C0009402	RET	5979	P07949	ret proto-oncogene	Kinase	607	0.392	0.885	1	0.6		1	14	0	2008	2019
Colorectal Carcinoma	C0009402	STK11	6794	Q15831	serine/threonine kinase 11	Kinase	372	0.435	0.808	0.9934	0.6	strong	1	14	5	1998	2019
Colorectal Carcinoma	C0009402	NAMPT	10135	P43490	nicotinamide phosphoribosyltransferase	Signaling	199	0.502	0.808	0.97914	0.57		1	8	0	2013	2019
Colorectal Carcinoma	C0009402	SLCO1B3	28234	Q9NPD5	solute carrier organic anion transporter family member 1B3	Transporter	87	0.592	0.769	5.321e-24	0.55		1	5	1	2008	2020
Colorectal Carcinoma	C0009402	EYA4	2070	O95677	EYA transcriptional coactivator and phosphatase 4		82	0.604	0.615	0.04872	0.54		1	5	1	2006	2015
Colorectal Carcinoma	C0009402	BUB1B	701	O60566	BUB1 mitotic checkpoint serine/threonine kinase B	Kinase	231	0.502	0.808	6.998e-10	0.54		1	4	1	2002	2016
Colorectal Carcinoma	C0009402	SYNE1	23345	Q8NF91	spectrin repeat containing nuclear envelope protein 1		237	0.511	0.846	3.1899e-52	0.53		1	5	3	2008	2015
Colorectal Carcinoma	C0009402	ABCA1	19	O95477	ATP binding cassette subfamily A member 1	Transporter	291	0.467	0.846	1.4525e-13	0.52		1	3	1	2012	2018
Colorectal Carcinoma	C0009402	EVL	51466	Q9UI08	Enah/Vasp-like		23	0.729	0.308	0.99761	0.52		1	4	1	2008	2015
Colorectal Carcinoma	C0009402	LGR6	59352	Q9HBX8	leucine rich repeat containing G protein-coupled receptor 6	G-protein coupled receptor	209	0.502	0.923	2.9439e-06	0.52		1	4	0	2008	2018
Colorectal Carcinoma	C0009402	TCERG1L	256536	Q5VWI1	transcription elongation regulator 1 like	Transcription factor	15	0.78	0.269	6.8376e-09	0.51		1	2	1	2011	2012
Colorectal Carcinoma	C0009402	ABCB5	340273	Q2M3G0	ATP binding cassette subfamily B member 5		61	0.623	0.538	1.5072e-37	0.51		1	2	0	2012	2018
Colorectal Carcinoma	C0009402	IL6ST	3572	P40189	interleukin 6 signal transducer	Signaling	260	0.475	0.808	0.99978	0.51		1	2	0	2009	2017
Colorectal Carcinoma	C0009402	DACT1	51339	Q9NYF0	dishevelled binding antagonist of beta catenin 1		134	0.547	0.692	0.40017	0.51		1	2	1	2008	2019
Colorectal Carcinoma	C0009402	PRKD1	5587	Q15139	protein kinase D1	Kinase	171	0.531	0.846	6.6485e-07	0.51		1	2	1	2011	2014
Colorectal Carcinoma	C0009402	CD109	135228	Q6YHK3	CD109 molecule		81	0.595	0.654	2.2707e-44	0.5		1	2	1	2008	2011
Colorectal Carcinoma	C0009402	HAPLN1	1404	P10915	hyaluronan and proteoglycan link protein 1	Extracellular structure	36	0.663	0.577	0.60242	0.5		1	1	0	2011	2011
Colorectal Carcinoma	C0009402	RNF182	221687	Q8N6D2	ring finger protein 182		9	0.839	0.115	0.0046762	0.5		1	1	0	2008	2008
Colorectal Carcinoma	C0009402	GREM1	26585	O60565	gremlin 1, DAN family BMP antagonist		179	0.508	0.808	0.47436	0.5		0.957	23	5	2003	2019
Colorectal Carcinoma	C0009402	MLH3	27030	Q9UHC1	mutL homolog 3	Nucleic acid binding	108	0.582	0.538	4.9023e-08	0.5		0.833	12	4	2000	2019
Colorectal Carcinoma	C0009402	GUCY1A2	2977	P33402	guanylate cyclase 1 soluble subunit alpha 2		10	0.792	0.192	0.31409	0.5		1	2	0	2008	2011
Colorectal Carcinoma	C0009402	SMAD7	4092	O15105	SMAD family member 7	Transcription factor	269	0.47	0.769	0.54854	0.5		0.984	63	12	2001	2019
Colorectal Carcinoma	C0009402	MCC	4163	P23508	MCC regulator of WNT signaling pathway		110	0.568	0.731	4.6577e-16	0.5		0.929	14	6	1991	2018
Colorectal Carcinoma	C0009402	COX1	4512	P00395	cytochrome c oxidase subunit I	Enzyme	421	0.441	0.885		0.5		1	12	2	1994	2019
Colorectal Carcinoma	C0009402	COX2	4513	P00403	cytochrome c oxidase subunit II	Enzyme	875	0.352	0.962		0.5		0.975	118	3	1994	2020
Colorectal Carcinoma	C0009402	MUTYH	4595	Q9UIF7	mutY DNA glycosylase	Enzyme	156	0.521	0.769	1.2619e-18	0.5	strong	0.947	132	20	2002	2019
Colorectal Carcinoma	C0009402	PMS2	5395	P54278	PMS1 homolog 2, mismatch repair system component	Nucleic acid binding	244	0.484	0.808	4.5176e-27	0.5	strong	0.967	60	6	1998	2020
Colorectal Carcinoma	C0009402	SH3TC1	54436	Q8TE82	SH3 domain and tetratricopeptide repeats 1		2	1	0.077	6.0939e-35	0.5		1	1	2	2011	2011
Colorectal Carcinoma	C0009402	PPARG	5468	P37231	peroxisome proliferator activated receptor gamma	Nuclear receptor	877	0.358	0.885	0.029194	0.5		0.938	48	8	2000	2019
Colorectal Carcinoma	C0009402	PRKCE	5581	Q02156	protein kinase C epsilon	Kinase	112	0.597	0.692	0.99988	0.5		1	1	1	1995	1995
Colorectal Carcinoma	C0009402	PTPRD	5789	P23468	protein tyrosine phosphatase receptor type D	Enzyme	93	0.584	0.731	1	0.5		1	2	1	2008	2011
Colorectal Carcinoma	C0009402	BMP4	652	P12644	bone morphogenetic protein 4	Signaling	423	0.422	0.808	0.9564	0.5		0.952	21	2	2008	2020
Colorectal Carcinoma	C0009402	TGFB1	7040	P01137	transforming growth factor beta 1	Signaling	1558	0.287	0.962	0.03685	0.5		0.971	69	3	1995	2020
Colorectal Carcinoma	C0009402	AXIN2	8313	Q9Y2T1	axin 2		169	0.507	0.692	0.57015	0.5		0.905	21	9	2001	2019
Colorectal Carcinoma	C0009402	CDH1	999	P12830	cadherin 1		508	0.401	0.808	0.14631	0.5		0.939	49	4	1997	2020
Colorectal Carcinoma	C0009402	ARID1A	8289	O14497	AT-rich interaction domain 1A		341	0.455	0.846	1	0.49		1	9	1	2014	2019
Colorectal Carcinoma	C0009402	GNAS	2778	O95467;P63092;P84996;Q5JWF2	GNAS complex locus	Enzyme modulator	536	0.42	0.885	0.68076	0.48		1	9	2	2005	2019
Colorectal Carcinoma	C0009402	DLC1	10395	Q96QB1	DLC1 Rho GTPase activating protein		144	0.529	0.731	0.99948	0.45		1	5	1	2013	2019
Colorectal Carcinoma	C0009402	CCND2	894	P30279	cyclin D2	Enzyme modulator	241	0.477	0.808	0.98658	0.45		1	9	4	2010	2019
Colorectal Carcinoma	C0009402	RHPN2	85415	Q8IUC4	rhophilin Rho GTPase binding protein 2	Enzyme modulator	21	0.711	0.192	1.0678e-07	0.44		1	9	4	2008	2019
Colorectal Carcinoma	C0009402	FEN1	2237	P39748	flap structure-specific endonuclease 1	Enzyme	113	0.55	0.731	4.7743e-05	0.43		1	5	1	2012	2019
Colorectal Carcinoma	C0009402	POLD3	10714	Q15054	DNA polymerase delta 3, accessory subunit		56	0.631	0.462	0.99776	0.42		1	7	3	2012	2019
Colorectal Carcinoma	C0009402	VTI1A	143187	Q96AJ9	vesicle transport through interaction with t-SNAREs 1A	Transporter	37	0.674	0.154	0.00054173	0.42		1	8	6	2011	2019
Colorectal Carcinoma	C0009402	LPAR1	1902	Q92633	lysophosphatidic acid receptor 1	G-protein coupled receptor	145	0.534	0.808	0.18603	0.42		1	3	1	2004	2019
Colorectal Carcinoma	C0009402	LRP1	4035	Q07954	LDL receptor related protein 1		252	0.482	0.769	1	0.42		1	4	4	2015	2019
Colorectal Carcinoma	C0009402	TET2	54790	Q6N021	tet methylcytosine dioxygenase 2		362	0.458	0.808	4.3334e-54	0.42		1	3	1	2016	2019
Colorectal Carcinoma	C0009402	HHIP	64399	Q96QV1	hedgehog interacting protein		122	0.55	0.654	0.95436	0.42		1	4	2	1999	2019
Colorectal Carcinoma	C0009402	SLCO2A1	6578	Q92959	solute carrier organic anion transporter family member 2A1	Transporter	112	0.578	0.654	2.2804e-13	0.42		1	5	3	2008	2019
Colorectal Carcinoma	C0009402	TMEM238L	100289255		transmembrane protein 238 like		29	0.691	0.308		0.41		1	4	1	2018	2019
Colorectal Carcinoma	C0009402	LAMC1	3915	P11047	laminin subunit gamma 1	Enzyme modulator	57	0.628	0.654	1	0.41		1	5	7	2013	2019
Colorectal Carcinoma	C0009402	PDGFRL	5157	Q15198	platelet derived growth factor receptor like	Enzyme	19	0.769	0.385	1.1787e-14	0.41		1	2	1	1995	2010
Colorectal Carcinoma	C0009402	CUBN	8029	O60494	cubilin		103	0.587	0.769	4.6292e-42	0.41		1	2	2	2015	2019
Colorectal Carcinoma	C0009402	YAP1	10413	P46937	Yes associated protein 1	Enzyme modulator	374	0.432	0.808	0.99918	0.4		0.973	37	0	2007	2019
Colorectal Carcinoma	C0009402	CHD1	1105	O14646	chromodomain helicase DNA binding protein 1		75	0.628	0.692	1	0.4		1	1	1	2019	2019
Colorectal Carcinoma	C0009402	WIF1	11197	Q9Y5W5	WNT inhibitory factor 1	Calcium-binding protein	171	0.507	0.731	1.3249e-09	0.4		1	14	0	2004	2019
Colorectal Carcinoma	C0009402	PARP1	142	P09874	poly(ADP-ribose) polymerase 1		565	0.389	0.923	0.00033366	0.4		1	19	2	2010	2019
Colorectal Carcinoma	C0009402	CYP1A2	1544	P05177	cytochrome P450 family 1 subfamily A member 2	Enzyme	218	0.494	0.923	2.4795e-10	0.4		0.895	19	3	1993	2014
Colorectal Carcinoma	C0009402	CYP1B1	1545	Q16678	cytochrome P450 family 1 subfamily B member 1	Enzyme	304	0.457	0.769	2.2024e-05	0.4		0.875	16	6	2005	2018
Colorectal Carcinoma	C0009402	NQO1	1728	P15559	NAD(P)H quinone dehydrogenase 1		368	0.434	0.885	1.1867e-09	0.4		0.875	16	2	1998	2019
Colorectal Carcinoma	C0009402	DPYD	1806	Q12882	dihydropyrimidine dehydrogenase	Enzyme	249	0.493	0.846	3.3686e-22	0.4		0.965	57	6	1998	2020
Colorectal Carcinoma	C0009402	TYMP	1890	P19971	thymidine phosphorylase	Enzyme	246	0.495	0.769	0.00011694	0.4		1	27	0	1996	2019
Colorectal Carcinoma	C0009402	EGFR	1956	P00533	epidermal growth factor receptor	Kinase	1394	0.295	0.885	0.36837	0.4		0.991	568	12	1992	2020
Colorectal Carcinoma	C0009402	FLCN	201163	Q8NFG4	folliculin		160	0.537	0.885	0.78892	0.4			0	4
Colorectal Carcinoma	C0009402	ERCC2	2068	P18074	ERCC excision repair 2, TFIIH core complex helicase subunit	Enzyme	499	0.42	0.846	7.0654e-20	0.4		0.846	26	4	2004	2019
Colorectal Carcinoma	C0009402	ESR2	2100	Q92731	estrogen receptor 2	Nuclear receptor	528	0.4	0.923	4.4516e-08	0.4		1	39	4	2004	2019
Colorectal Carcinoma	C0009402	ALDH2	217	P05091	aldehyde dehydrogenase 2 family member	Enzyme	337	0.457	0.885	3.3959e-10	0.4		0.941	17	3	1999	2017
Colorectal Carcinoma	C0009402	SATB2	23314	Q9UPW6	SATB homeobox 2	Transcription factor	233	0.503	0.769	0.99999	0.4		1	23	0	2009	2019
Colorectal Carcinoma	C0009402	FN1	2335	P02751	fibronectin 1	Signaling	724	0.365	0.962	0.0014045	0.4		1	11	1	1995	2019
Colorectal Carcinoma	C0009402	GSTM1	2944	P09488	glutathione S-transferase mu 1		627	0.38	0.923	0.0020641	0.4		0.891	64	2	1995	2019
Colorectal Carcinoma	C0009402	GUCY2C	2984	P25092	guanylate cyclase 2C	Kinase	88	0.599	0.577	1.3919e-30	0.4		1	36	0	1998	2019
Colorectal Carcinoma	C0009402	IGF2	3481	P01344	insulin like growth factor 2		604	0.39	0.885	0.044127	0.4		1	49	0	1996	2020
Colorectal Carcinoma	C0009402	CXCL8	3576	P10145	C-X-C motif chemokine ligand 8	Signaling	1254	0.31	0.962	0.00027377	0.4		1	46	0	1996	2019
Colorectal Carcinoma	C0009402	FADS1	3992	O60427	fatty acid desaturase 1		125	0.582	0.769	0.37384	0.4		1	1	1	2014	2014
Colorectal Carcinoma	C0009402	SMAD2	4087	Q15796	SMAD family member 2	Transcription factor	289	0.456	0.808	0.99661	0.4		0.963	27	0	1996	2019
Colorectal Carcinoma	C0009402	SMAD9	4093	O15198	SMAD family member 9	Transcription factor	43	0.666	0.308	6.4444e-05	0.4		1	2	2	2019	2019
Colorectal Carcinoma	C0009402	MMP1	4312	P03956	matrix metallopeptidase 1	Enzyme	589	0.385	0.885	7.7197e-18	0.4		0.931	29	0	2000	2019
Colorectal Carcinoma	C0009402	ABCC1	4363	P33527	ATP binding cassette subfamily C member 1	Transporter	333	0.445	0.808	0.0011727	0.4		1	13	0	1996	2019
Colorectal Carcinoma	C0009402	CYTB	4519	P00156	cytochrome b		166	0.529	0.808		0.4			0	2
Colorectal Carcinoma	C0009402	MTHFR	4524	P42898	methylenetetrahydrofolate reductase		985	0.337	0.885	3.2068e-10	0.4		0.932	118	12	1996	2019
Colorectal Carcinoma	C0009402	ND4L	4539	P03901	NADH dehydrogenase, subunit 4L (complex I)	Enzyme	27	0.805	0.308		0.4			0	1
Colorectal Carcinoma	C0009402	MYC	4609	P01106	MYC proto-oncogene, bHLH transcription factor	Transcription factor	821	0.344	0.923	0.99801	0.4		1	73	0	1990	2019
Colorectal Carcinoma	C0009402	NME1	4830	P15531	NME/NM23 nucleoside diphosphate kinase 1	Kinase	329	0.443	0.808	0.0031764	0.4		0.885	26	0	1991	2018
Colorectal Carcinoma	C0009402	ODC1	4953	P11926	ornithine decarboxylase 1	Enzyme	184	0.51	0.731	0.16966	0.4		1	18	1	1990	2019
Colorectal Carcinoma	C0009402	LEF1	51176	Q9UJU2	lymphoid enhancer binding factor 1		211	0.486	0.769	0.99789	0.4		1	10	1	2004	2018
Colorectal Carcinoma	C0009402	KRT20	54474	P35900	keratin 20		559	0.388	0.846	9.0776e-11	0.4		0.923	52	0	1996	2019
Colorectal Carcinoma	C0009402	RNF43	54894	Q68DV7	ring finger protein 43		88	0.584	0.577	0.73452	0.4		1	21	1	2004	2019
Colorectal Carcinoma	C0009402	FBXW7	55294	Q969H0	F-box and WD repeat domain containing 7	Enzyme modulator	257	0.465	0.808	0.99949	0.4		0.962	26	1	2004	2019
Colorectal Carcinoma	C0009402	ZMIZ1	57178	Q9ULJ6	zinc finger MIZ-type containing 1		96	0.588	0.615	0.99937	0.4		1	2	1	2014	2019
Colorectal Carcinoma	C0009402	PTEN	5728	P60484	phosphatase and tensin homolog	Enzyme	1349	0.305	0.923	0.25651	0.4	strong	0.964	83	4	2000	2019
Colorectal Carcinoma	C0009402	PTGS2	5743	P35354	prostaglandin-endoperoxide synthase 2	Enzyme	1234	0.314	0.962	0.99597	0.4		0.979	243	11	1994	2020
Colorectal Carcinoma	C0009402	CCND1	595	P24385	cyclin D1	Enzyme modulator	859	0.344	0.923	0.89057	0.4		0.953	64	1	1997	2019
Colorectal Carcinoma	C0009402	BCL2	596	P10415	BCL2 apoptosis regulator	Signaling	1456	0.291	0.885	0.55903	0.4		0.978	92	2	1994	2020
Colorectal Carcinoma	C0009402	SFRP1	6422	Q8N474	secreted frizzled related protein 1		227	0.479	0.846	0.96457	0.4		1	22	0	2002	2019
Colorectal Carcinoma	C0009402	SFRP2	6423	Q96HF1	secreted frizzled related protein 2		134	0.544	0.731	0.0016693	0.4		0.963	27	0	2004	2019
Colorectal Carcinoma	C0009402	NXN	64359	Q6DKJ4	nucleoredoxin		117	0.584	0.577	0.99725	0.4		1	4	4	2014	2019
Colorectal Carcinoma	C0009402	SPARC	6678	P09486	secreted protein acidic and cysteine rich	Signaling	344	0.445	0.846	0.89148	0.4		1	13	0	1995	2019
Colorectal Carcinoma	C0009402	SRC	6714	P12931	SRC proto-oncogene, non-receptor tyrosine kinase	Kinase	265	0.467	0.885	0.99691	0.4		0.929	14	0	1995	2020
Colorectal Carcinoma	C0009402	AURKA	6790	O14965	aurora kinase A	Kinase	245	0.475	0.731	0.8676	0.4		0.933	15	1	2004	2019
Colorectal Carcinoma	C0009402	TGFBR1	7046	P36897	transforming growth factor beta receptor 1	Kinase	347	0.451	0.885	0.85379	0.4		0.96	25	6	2003	2019
Colorectal Carcinoma	C0009402	TGFBR2	7048	P37173	transforming growth factor beta receptor 2	Kinase	502	0.413	0.846	0.12535	0.4		1	38	2	1995	2020
Colorectal Carcinoma	C0009402	TLR2	7097	O60603	toll like receptor 2		749	0.361	0.923	1.0152e-06	0.4		1	12	2	2006	2019
Colorectal Carcinoma	C0009402	TLR4	7099	O00206	toll like receptor 4		1174	0.321	0.962	4.6131e-09	0.4		1	38	8	2006	2019
Colorectal Carcinoma	C0009402	TNF	7124	P01375	tumor necrosis factor	Signaling	2724	0.231	0.962	0.8033	0.4		0.986	70	2	1989	2019
Colorectal Carcinoma	C0009402	TYMS	7298	P04818	thymidylate synthetase	Enzyme	406	0.425	0.846	0.72247	0.4		0.979	140	3	1991	2019
Colorectal Carcinoma	C0009402	XRCC1	7515	P18887	X-ray repair cross complementing 1		410	0.421	0.923	6.3386e-09	0.4		0.826	46	5	2000	2017
Colorectal Carcinoma	C0009402	TFPI2	7980	P48307	tissue factor pathway inhibitor 2	Enzyme modulator	161	0.521	0.769	0.00084274	0.4		1	15	0	2009	2019
Colorectal Carcinoma	C0009402	CALR	811	P27797	calreticulin	Calcium-binding protein	487	0.413	0.923	0.89133	0.4		0.909	11	0	2007	2020
Colorectal Carcinoma	C0009402	CASP8	841	Q14790	caspase 8	Enzyme	480	0.404	0.923	3.7236e-06	0.4		0.944	18	3	2003	2019
Colorectal Carcinoma	C0009402	LGR5	8549	O75473	leucine rich repeat containing G protein-coupled receptor 5	G-protein coupled receptor	131	0.542	0.654	2.5019e-08	0.4		1	46	0	2010	2019
Colorectal Carcinoma	C0009402	TNFSF10	8743	P50591	TNF superfamily member 10	Signaling	445	0.413	0.885	0.13495	0.4		1	27	0	2002	2019
Colorectal Carcinoma	C0009402	PROM1	8842	O43490	prominin 1	Transporter	477	0.41	0.846	1.9485e-22	0.4		0.97	67	2	2008	2020
Colorectal Carcinoma	C0009402	BOC	91653	Q9BWV1	BOC cell adhesion associated, oncogene regulated		33	0.666	0.423	1.7426e-07	0.4		1	1	1	2019	2019
Colorectal Carcinoma	C0009402	DCLK1	9201	O15075	doublecortin like kinase 1	Kinase	123	0.545	0.615	0.99964	0.4		1	25	0	2009	2019
Colorectal Carcinoma	C0009402	MTDH	92140	Q86UE4	metadherin		200	0.491	0.769	0.32924	0.4		1	15	0	2012	2019
Colorectal Carcinoma	C0009402	FADS2	9415	O95864	fatty acid desaturase 2		140	0.575	0.692	0.99815	0.4		1	4	4	2014	2019
Colorectal Carcinoma	C0009402	ABCG2	9429	Q9UNQ0	ATP binding cassette subfamily G member 2 (Junior blood group)	Transporter	420	0.419	0.885	2.0957e-32	0.4		0.958	24	3	2004	2018
Colorectal Carcinoma	C0009402	ADH1B	125	P00325	alcohol dehydrogenase 1B (class I), beta polypeptide	Enzyme	224	0.502	0.846	9.934e-07	0.39		0.889	9	1	2006	2018
Colorectal Carcinoma	C0009402	BIRC5	332	O15392	baculoviral IAP repeat containing 5	Enzyme modulator	199	0.495	0.731	0.055854	0.39		1	10	1	2001	2016
Colorectal Carcinoma	C0009402	MTRR	4552	Q9UBK8	5-methyltetrahydrofolate-homocysteine methyltransferase reductase		207	0.502	0.808	2.1794e-14	0.39		1	11	3	2002	2019
Colorectal Carcinoma	C0009402	NTHL1	4913	P78549	nth like DNA glycosylase 1	Enzyme	57	0.623	0.615	5.6607e-10	0.39	strong	1	9	1	2006	2019
Colorectal Carcinoma	C0009402	WNK1	65125	Q9H4A3	WNK lysine deficient protein kinase 1	Kinase	460	0.416	0.846	1	0.39		1	9	0	2004	2019
Colorectal Carcinoma	C0009402	TGM2	7052	P21980	transglutaminase 2	Enzyme	315	0.445	0.808	6.8118e-18	0.39		1	9	0	2010	2019
Colorectal Carcinoma	C0009402	TIAM1	7074	Q13009	TIAM Rac1 associated GEF 1		98	0.579	0.731	0.95662	0.39		1	9	2	2005	2019
Colorectal Carcinoma	C0009402	ATG5	9474	Q9H1Y0	autophagy related 5	Transporter	282	0.462	0.885	0.97758	0.39		1	9	0	2012	2019
Colorectal Carcinoma	C0009402	CSF2	1437	P04141	colony stimulating factor 2	Signaling	1028	0.33	0.962	0.83468	0.38		1	9	0	2000	2018
Colorectal Carcinoma	C0009402	EPHA1	2041	P21709	EPH receptor A1	Kinase	119	0.544	0.731	1.4624e-23	0.38		1	8	0	2009	2019
Colorectal Carcinoma	C0009402	BMP2	650	P12643	bone morphogenetic protein 2	Signaling	428	0.432	0.846	0.98799	0.38		0.889	9	0	2011	2019
Colorectal Carcinoma	C0009402	TNFSF13	8741	O75888	TNF superfamily member 13		189	0.499	0.769	0.81724	0.38		1	9	0	2008	2014
Colorectal Carcinoma	C0009402	ZEB2	9839	O60315	zinc finger E-box binding homeobox 2	Transcription factor	292	0.471	0.808	1	0.38		1	8	0	2010	2019
Colorectal Carcinoma	C0009402	RRM2	6241	P31350	ribonucleotide reductase regulatory subunit M2	Enzyme	101	0.555	0.769	0.2964	0.37		1	8	0	2005	2019
Colorectal Carcinoma	C0009402	SOD2	6648	P04179	superoxide dismutase 2	Enzyme	668	0.379	0.923	0.15499	0.37		1	9	0	2000	2017
Colorectal Carcinoma	C0009402	CDO1	1036	Q16878	cysteine dioxygenase type 1		72	0.592	0.654	0.0096603	0.36		1	6	0	2012	2019
Colorectal Carcinoma	C0009402	CSE1L	1434	P55060	chromosome segregation 1 like	Enzyme modulator	163	0.521	0.808	1	0.36		1	6	0	2012	2018
Colorectal Carcinoma	C0009402	FPGS	2356	Q05932	folylpolyglutamate synthase	Enzyme	40	0.644	0.423	1.1579e-06	0.36		0.857	7	0	2003	2016
Colorectal Carcinoma	C0009402	IDH1	3417	O75874	isocitrate dehydrogenase (NADP(+)) 1		399	0.424	0.808	2.6244e-12	0.36		0.667	6	2	2014	2018
Colorectal Carcinoma	C0009402	MIR106B	406900		microRNA 106b		143	0.523	0.808		0.36		1	7	0	2012	2019
Colorectal Carcinoma	C0009402	MIR26B	407017		microRNA 26b		128	0.529	0.808		0.36		1	7	0	2011	2018
Colorectal Carcinoma	C0009402	MPO	4353	P05164	myeloperoxidase	Enzyme	653	0.377	0.923	7.105e-15	0.36		1	6	2	2008	2019
Colorectal Carcinoma	C0009402	ING4	51147	Q9UNL4	inhibitor of growth family member 4	Nucleic acid binding	92	0.573	0.577	0.029013	0.36		1	6	0	2012	2019
Colorectal Carcinoma	C0009402	TLR9	54106	Q9NR96	toll like receptor 9		457	0.411	0.885	9.8117e-06	0.36		1	6	2	2012	2018
Colorectal Carcinoma	C0009402	PRKCB	5579	P05771	protein kinase C beta	Kinase	317	0.453	0.885	1	0.36		1	7	0	1993	2020
Colorectal Carcinoma	C0009402	AKR1B10	57016	O60218	aldo-keto reductase family 1 member B10	Enzyme	130	0.546	0.769	7.5723e-09	0.36		1	6	0	2007	2019
Colorectal Carcinoma	C0009402	GGH	8836	Q92820	gamma-glutamyl hydrolase	Enzyme	66	0.608	0.5	0.58132	0.36		0.857	7	0	2003	2016
Colorectal Carcinoma	C0009402	EXO1	9156	Q9UQ84	exonuclease 1	Enzyme	87	0.578	0.692	8.12e-13	0.36		0.857	7	4	2003	2016
Colorectal Carcinoma	C0009402	KL	9365	Q9UEF7	klotho	Enzyme	332	0.448	0.769	0.00022444	0.36		1	6	1	2011	2019
Colorectal Carcinoma	C0009402	AKAP12	9590	Q02952	A-kinase anchoring protein 12		99	0.566	0.615	0.035666	0.36		1	6	1	2008	2018
Colorectal Carcinoma	C0009402	KLF2	10365	Q9Y5W3	Kruppel like factor 2	Nucleic acid binding	132	0.542	0.692	0.56044	0.35		1	6	0	2017	2019
Colorectal Carcinoma	C0009402	STRAP	11171	Q9Y3F4	serine/threonine kinase receptor associated protein		27	0.716	0.269	0.90143	0.35		1	6	0	2005	2019
Colorectal Carcinoma	C0009402	DHFR	1719	P00374	dihydrofolate reductase	Enzyme	191	0.513	0.808	0.0343	0.35		1	6	1	2003	2016
Colorectal Carcinoma	C0009402	MIR93	407050		microRNA 93		171	0.507	0.808		0.35		1	6	0	2012	2019
Colorectal Carcinoma	C0009402	MMP11	4320	P24347	matrix metallopeptidase 11	Enzyme	130	0.542	0.692	2.4125e-05	0.35		1	5	0	1995	2019
Colorectal Carcinoma	C0009402	ACKR3	57007	P25106	atypical chemokine receptor 3	G-protein coupled receptor	400	0.428	0.885	0.39134	0.35		1	6	0	2011	2019
Colorectal Carcinoma	C0009402	KMT2C	58508	Q8NEZ4	lysine methyltransferase 2C		114	0.558	0.692	1	0.35		1	5	1	2011	2016
Colorectal Carcinoma	C0009402	SLC19A1	6573	P41440	solute carrier family 19 member 1	Transporter	155	0.523	0.692	6.4655e-06	0.35		0.833	6	0	2003	2015
Colorectal Carcinoma	C0009402	TK1	7083	P04183	thymidine kinase 1	Kinase	82	0.592	0.538	0.13731	0.35		0.833	6	0	2003	2019
Colorectal Carcinoma	C0009402	WRN	7486	Q14191	WRN RecQ like helicase	Enzyme	172	0.524	0.808	2.6432e-34	0.35		1	5	5	2007	2016
Colorectal Carcinoma	C0009402	GALNT12	79695	Q8IXK2	polypeptide N-acetylgalactosaminyltransferase 12	Enzyme	16	0.78	0.269	9.3863e-07	0.35		0.8	5	2	2012	2019
Colorectal Carcinoma	C0009402	ABCC3	8714	O15438	ATP binding cassette subfamily C member 3	Transporter	160	0.517	0.769	1.2092e-26	0.35		0.833	6	1	1997	2017
Colorectal Carcinoma	C0009402	MIR1271	100302203		microRNA 1271		38	0.659	0.5		0.34		1	4	0	2017	2019
Colorectal Carcinoma	C0009402	AKAP9	10142	Q99996	A-kinase anchoring protein 9		60	0.638	0.385	4.5249e-17	0.34		1	4	2	2006	2016
Colorectal Carcinoma	C0009402	ABCC2	1244	Q92887	ATP binding cassette subfamily C member 2	Transporter	254	0.483	0.808	5.2025e-47	0.34		1	5	1	2012	2015
Colorectal Carcinoma	C0009402	GATA5	140628	Q9BWX5	GATA binding protein 5		101	0.578	0.615	0.28478	0.34		1	4	0	2009	2015
Colorectal Carcinoma	C0009402	EPHA3	2042	P29320	EPH receptor A3	Kinase	193	0.497	0.692	1.1953e-05	0.34		0.75	4	1	2016	2019
Colorectal Carcinoma	C0009402	FAT1	2195	Q14517	FAT atypical cadherin 1		178	0.508	0.808	1.1969e-12	0.34		1	4	0	2013	2018
Colorectal Carcinoma	C0009402	FOLH1	2346	Q04609	folate hydrolase 1	Enzyme	311	0.453	0.885	6.1977e-09	0.34		0.75	4	6	2001	2015
Colorectal Carcinoma	C0009402	AMACR	23600	Q9UHK6	alpha-methylacyl-CoA racemase		179	0.51	0.769	0.027363	0.34		1	5	0	2002	2015
Colorectal Carcinoma	C0009402	GAPDH	2597	P04406	glyceraldehyde-3-phosphate dehydrogenase	Enzyme	305	0.447	0.808	0.11388	0.34		1	5	0	2006	2019
Colorectal Carcinoma	C0009402	CHD5	26038	Q8TDI0	chromodomain helicase DNA binding protein 5		64	0.604	0.5	1	0.34		0.8	5	0	2009	2016
Colorectal Carcinoma	C0009402	MIR130B	406920		microRNA 130b		115	0.547	0.808		0.34		1	5	1	2012	2019
Colorectal Carcinoma	C0009402	MKI67	4288	P46013	marker of proliferation Ki-67		351	0.431	0.808	1.2598e-28	0.34		1	5	0	2003	2018
Colorectal Carcinoma	C0009402	NR4A2	4929	P43354	nuclear receptor subfamily 4 group A member 2	Nuclear receptor	166	0.529	0.846	0.99959	0.34		1	4	0	2006	2013
Colorectal Carcinoma	C0009402	PPP2R1B	5519	P30154	protein phosphatase 2 scaffold subunit Abeta	Enzyme	38	0.678	0.423	3.0047e-15	0.34		1	4	1	2000	2015
Colorectal Carcinoma	C0009402	PRKCZ	5590	Q05513	protein kinase C zeta	Kinase	88	0.604	0.654	0.541	0.34		1	4	0	2017	2019
Colorectal Carcinoma	C0009402	RPS6KB1	6198	P23443	ribosomal protein S6 kinase B1	Kinase	169	0.511	0.731	0.97285	0.34		1	4	1	2017	2020
Colorectal Carcinoma	C0009402	SELENOP	6414	P49908	selenoprotein P	Extracellular structure	138	0.545	0.769	8.2884e-07	0.34		1	5	1	2004	2010
Colorectal Carcinoma	C0009402	BMPR1A	657	P36894	bone morphogenetic protein receptor type 1A	Kinase	203	0.522	0.731	0.90333	0.34	strong	1	4	0	2015	2018
Colorectal Carcinoma	C0009402	TFRC	7037	P02786	transferrin receptor	Enzyme	359	0.437	0.885	6.9902e-05	0.34		1	5	0	2000	2019
Colorectal Carcinoma	C0009402	ZNF217	7764	O75362	zinc finger protein 217		66	0.617	0.538	0.99995	0.34		1	4	1	2000	2015
Colorectal Carcinoma	C0009402	SESN2	83667	P58004	sestrin 2	Enzyme	169	0.508	0.808	4.1912e-07	0.34		1	5	0	2017	2019
Colorectal Carcinoma	C0009402	ATAD1	84896	Q8NBU5	ATPase family AAA domain containing 1		126	0.545	0.692	0.0013367	0.34		1	4	0	1995	2014
Colorectal Carcinoma	C0009402	TP63	8626	Q9H3D4	tumor protein p63	Transcription factor	816	0.362	0.769	0.99728	0.34		1	5	0	2005	2019
Colorectal Carcinoma	C0009402	ABCB6	10058	Q9NP58	ATP binding cassette subfamily B member 6 (Langereis blood group)	Transporter	400	0.431	0.885	8.5999e-19	0.33		1	4	0	2003	2019
Colorectal Carcinoma	C0009402	PTPRU	10076	Q92729	protein tyrosine phosphatase receptor type U	Enzyme	88	0.581	0.654	0.39251	0.33		1	3	2	2010	2019
Colorectal Carcinoma	C0009402	TENM1	10178	Q9UKZ4	teneurin transmembrane protein 1		43	0.653	0.692	1	0.33		1	3	0	2013	2018
Colorectal Carcinoma	C0009402	APC2	10297	O95996	APC regulator of WNT signaling pathway 2		108	0.582	0.654	0.99994	0.33		1	6	0	2008	2019
Colorectal Carcinoma	C0009402	POSTN	10631	Q15063	periostin	Signaling	378	0.428	0.885	1.0666e-09	0.33		1	4	0	2005	2018
Colorectal Carcinoma	C0009402	CFTR	1080	P13569	CF transmembrane conductance regulator	Ion channel	476	0.424	0.885	2.1735e-58	0.33		1	4	0	2004	2019
Colorectal Carcinoma	C0009402	CAPN10	11132	Q9HC96	calpain 10	Enzyme	58	0.621	0.577	6.9206e-13	0.33		1	3	1	2007	2015
Colorectal Carcinoma	C0009402	CPE	1363	P16870	carboxypeptidase E		101	0.584	0.692	0.99233	0.33		1	3	1	2010	2013
Colorectal Carcinoma	C0009402	PRIMA1	145270	Q86XR5	proline rich membrane anchor 1		69	0.595	0.615	0.62894	0.33		0.667	3	0	2015	2016
Colorectal Carcinoma	C0009402	CYP2A6	1548	P11509	cytochrome P450 family 2 subfamily A member 6		133	0.556	0.731	5.401e-09	0.33		1	3	0	2002	2007
Colorectal Carcinoma	C0009402	BRINP1	1620	O60477	BMP/retinoic acid inducible neural specific 1		64	0.615	0.615	0.99251	0.33		1	3	0	2014	2018
Colorectal Carcinoma	C0009402	DPEP1	1800	P16444	dipeptidase 1		100	0.57	0.654	3.473e-10	0.33		1	3	1	2011	2013
Colorectal Carcinoma	C0009402	EPHB6	2051	O15197	EPH receptor B6	Kinase	60	0.619	0.538	1.2013e-07	0.33		1	3	0	2014	2017
Colorectal Carcinoma	C0009402	ACSL4	2182	O60488	acyl-CoA synthetase long chain family member 4	Enzyme	136	0.561	0.769	0.98103	0.33		1	3	1	2016	2019
Colorectal Carcinoma	C0009402	EFEMP1	2202	Q12805	EGF containing fibulin extracellular matrix protein 1	Extracellular structure	153	0.54	0.769	0.99992	0.33		1	4	0	2007	2019
Colorectal Carcinoma	C0009402	TPX2	22974	Q9ULW0	TPX2 microtubule nucleation factor	Cellular structure	122	0.541	0.692	0.99981	0.33		1	3	0	1999	2015
Colorectal Carcinoma	C0009402	LAMA1	284217	P25391	laminin subunit alpha 1		107	0.582	0.808	3.2248e-32	0.33		1	4	0	2011	2018
Colorectal Carcinoma	C0009402	PYCARD	29108	Q9ULZ3	PYD and CARD domain containing	Enzyme	294	0.457	0.808	0.00019768	0.33		1	3	0	2003	2007
Colorectal Carcinoma	C0009402	IFNA1	3439	P01562	interferon alpha 1		662	0.371	0.923		0.33		1	4	0	1999	2019
Colorectal Carcinoma	C0009402	LIFR	3977	P42702	LIF receptor subunit alpha	Signaling	198	0.523	0.808	1.4888e-13	0.33		1	3	1	2011	2018
Colorectal Carcinoma	C0009402	ARNT	405	P27540	aryl hydrocarbon receptor nuclear translocator	Transcription factor	104	0.575	0.692	0.99581	0.33		1	3	0	2011	2015
Colorectal Carcinoma	C0009402	PER1	5187	O15534	period circadian regulator 1	Transcription factor	111	0.556	0.731	0.00029308	0.33		1	3	1	2009	2015
Colorectal Carcinoma	C0009402	XAF1	54739	Q6GPH4	XIAP associated factor 1		83	0.587	0.769	6.8151e-12	0.33		1	3	0	2007	2019
Colorectal Carcinoma	C0009402	RTN4	57142	Q9NQC3	reticulon 4		71	0.621	0.692	0.45318	0.33		1	3	0	1997	2017
Colorectal Carcinoma	C0009402	SFRP4	6424	Q6FHJ7	secreted frizzled related protein 4		155	0.524	0.654	9.2586e-05	0.33		1	4	2	2006	2010
Colorectal Carcinoma	C0009402	SRSF6	6431	Q13247	serine and arginine rich splicing factor 6	Nucleic acid binding	37	0.67	0.462	0.91099	0.33		1	3	0	2016	2019
Colorectal Carcinoma	C0009402	TCF3	6929	P15923	transcription factor 3	Transcription factor	244	0.476	0.846	0.025824	0.33		1	3	2	2013	2015
Colorectal Carcinoma	C0009402	TCN2	6948	P20062	transcobalamin 2		104	0.578	0.615	1.0478e-06	0.33		1	4	2	2006	2013
Colorectal Carcinoma	C0009402	UMPS	7372	P11172	uridine monophosphate synthetase		102	0.584	0.615	0.0001051	0.33		1	5	0	2005	2013
Colorectal Carcinoma	C0009402	PDGFD	80310	Q9GZP0	platelet derived growth factor D	Signaling	94	0.579	0.538	0.0017145	0.33		1	3	0	2017	2019
Colorectal Carcinoma	C0009402	IRS4	8471	O14654	insulin receptor substrate 4		35	0.67	0.577	0.36317	0.33		1	3	0	2018	2018
Colorectal Carcinoma	C0009402	TNS4	84951	Q8IZW8	tensin 4		31	0.682	0.346	3.525e-07	0.33		1	3	1	2011	2019
Colorectal Carcinoma	C0009402	EIF3H	8667	O15372	eukaryotic translation initiation factor 3 subunit H	Enzyme	31	0.7	0.308	0.047483	0.33		1	4	0	2008	2019
Colorectal Carcinoma	C0009402	SELENBP1	8991	Q13228	selenium binding protein 1	Immune response	214	0.493	0.846	3.2268e-16	0.33		1	3	0	2008	2014
Colorectal Carcinoma	C0009402	RASAL2	9462	Q9UJF2	RAS protein activator like 2	Enzyme modulator	38	0.67	0.346	0.79641	0.33		1	3	1	2017	2019
Colorectal Carcinoma	C0009402	RASSF2	9770	P50749	Ras association domain family member 2	Enzyme modulator	66	0.615	0.5	5.0648e-07	0.33		1	3	1	2005	2013
Colorectal Carcinoma	C0009402	ABCC5	10057	O15440	ATP binding cassette subfamily C member 5	Transporter	71	0.606	0.654	0.0041518	0.32		1	3	0	2012	2019
Colorectal Carcinoma	C0009402	TRIM28	10155	Q13263	tripartite motif containing 28		82	0.592	0.731	1	0.32		1	3	0	2017	2019
Colorectal Carcinoma	C0009402	ABCC4	10257	O15439	ATP binding cassette subfamily C member 4	Transporter	146	0.536	0.769	1.0674e-07	0.32		1	3	1	2012	2017
Colorectal Carcinoma	C0009402	MCRS1	10445	Q96EZ8	microspherule protein 1		37	0.666	0.385	0.16561	0.32		1	2	1	2009	2012
Colorectal Carcinoma	C0009402	GPNMB	10457	Q14956	glycoprotein nmb	Signaling	103	0.566	0.692	2.8803e-27	0.32		1	4	0	2008	2018
Colorectal Carcinoma	C0009402	CACUL1	143384	Q86Y37	CDK2 associated cullin domain 1		54	0.638	0.577	0.96315	0.32		1	3	0	2012	2019
Colorectal Carcinoma	C0009402	CTNND2	1501	Q9UQB3	catenin delta 2	Cellular structure	117	0.579	0.731	1	0.32		1	2	0	2014	2015
Colorectal Carcinoma	C0009402	CUX1	1523	P39880;Q13948	cut like homeobox 1	Transcription factor	283	0.465	0.846	1	0.32		1	2	1	2006	2013
Colorectal Carcinoma	C0009402	ADAMTS15	170689	Q8TE58	ADAM metallopeptidase with thrombospondin type 1 motif 15	Enzyme	17	0.769	0.231	1.6672e-06	0.32		1	2	1	2009	2009
Colorectal Carcinoma	C0009402	SLC29A1	2030	Q99808	solute carrier family 29 member 1 (Augustine blood group)	Transporter	91	0.587	0.731	0.90069	0.32		1	2	1	2016	2017
Colorectal Carcinoma	C0009402	EPHA7	2045	Q15375	EPH receptor A7	Kinase	64	0.619	0.5	1	0.32		1	2	1	2005	2019
Colorectal Carcinoma	C0009402	ERCC6	2074	P0DP91;Q03468	ERCC excision repair 6, chromatin remodeling factor		257	0.507	0.808	5.1622e-22	0.32		1	2	2	2006	2017
Colorectal Carcinoma	C0009402	NTNG1	22854	Q9Y2I2	netrin G1	Enzyme modulator	64	0.65	0.423	0.9167	0.32		1	3	0	2003	2015
Colorectal Carcinoma	C0009402	ABCA4	24	P78363	ATP binding cassette subfamily A member 4	Transporter	227	0.493	0.769	5.3499e-48	0.32		1	3	0	2012	2018
Colorectal Carcinoma	C0009402	MTHFD1L	25902	Q6UB35	methylenetetrahydrofolate dehydrogenase (NADP+ dependent) 1 like	Enzyme	41	0.674	0.538	1.9355e-12	0.32		1	2	0	2004	2019
Colorectal Carcinoma	C0009402	GATA4	2626	P43694	GATA binding protein 4		336	0.458	0.846	0.49308	0.32		1	2	0	2003	2009
Colorectal Carcinoma	C0009402	GPX4	2879	P36969	glutathione peroxidase 4	Enzyme	201	0.516	0.808	4.7865e-05	0.32		1	3	1	2007	2018
Colorectal Carcinoma	C0009402	GSTM3	2947	P21266	glutathione S-transferase mu 3		111	0.552	0.808	4.3638e-07	0.32		1	3	0	2001	2007
Colorectal Carcinoma	C0009402	GTF2B	2959	Q00403	general transcription factor IIB	Transcription factor	17	0.769	0.308	0.00011548	0.32		1	2	1	2017	2019
Colorectal Carcinoma	C0009402	ACACA	31	Q13085	acetyl-CoA carboxylase alpha		241	0.48	0.846	1	0.32		1	2	1	2017	2020
Colorectal Carcinoma	C0009402	VWA2	340706	Q5GFL6	von Willebrand factor A domain containing 2		16	0.78	0.308	1.2242e-17	0.32		1	2	0	2018	2019
Colorectal Carcinoma	C0009402	NME2	4831	P22392	NME/NM23 nucleoside diphosphate kinase 2	Kinase	95	0.573	0.731	8.8471e-09	0.32		1	3	0	1995	2018
Colorectal Carcinoma	C0009402	P2RX7	5027	Q99572	purinergic receptor P2X 7	Ion channel	337	0.45	0.808	3.3344e-11	0.32		1	2	0	2017	2019
Colorectal Carcinoma	C0009402	NUSAP1	51203	Q9BXS6	nucleolar and spindle associated protein 1		55	0.623	0.346	0.045674	0.32		1	3	0	2015	2018
Colorectal Carcinoma	C0009402	ACSL5	51703	Q9ULC5	acyl-CoA synthetase long chain family member 5	Enzyme	51	0.641	0.5	2.8888e-09	0.32		1	2	0	2005	2017
Colorectal Carcinoma	C0009402	SERPINB5	5268	P36952	serpin family B member 5	Enzyme modulator	87	0.582	0.577	0.0036486	0.32		1	3	0	2006	2015
Colorectal Carcinoma	C0009402	ASAP3	55616	Q8TDY4	ArfGAP with SH3 domain, ankyrin repeat and PH domain 3		25	0.722	0.192	8.33e-12	0.32		1	2	0	2017	2019
Colorectal Carcinoma	C0009402	PRPS1	5631	P60891	phosphoribosyl pyrophosphate synthetase 1	Kinase	151	0.584	0.731	0.91542	0.32		1	2	0	2018	2019
Colorectal Carcinoma	C0009402	SLC12A5	57468	Q9H2X9	solute carrier family 12 member 5	Transporter	135	0.57	0.654	1	0.32		1	2	0	2016	2019
Colorectal Carcinoma	C0009402	PTPRS	5802	Q13332	protein tyrosine phosphatase receptor type S	Enzyme	12	0.769	0.308	0.99983	0.32		1	2	1	2018	2019
Colorectal Carcinoma	C0009402	SOX17	64321	Q9H6I2	SRY-box transcription factor 17	Transcription factor	113	0.555	0.615	0.88495	0.32		1	2	0	2008	2011
Colorectal Carcinoma	C0009402	SCG5	6447	P05408	secretogranin V	Signaling	32	0.663	0.462	6.2865e-05	0.32		1	2	0	2008	2014
Colorectal Carcinoma	C0009402	CENPH	64946	Q9H3R5	centromere protein H		26	0.705	0.308	1.5465e-07	0.32		1	2	1	2005	2017
Colorectal Carcinoma	C0009402	BMP6	654	P22004	bone morphogenetic protein 6	Signaling	137	0.531	0.808	0.75947	0.32		1	2	1	2012	2014
Colorectal Carcinoma	C0009402	TBX1	6899	O43435	T-box transcription factor 1	Transcription factor	417	0.433	0.808	0.83661	0.32		1	2	0	2011	2012
Colorectal Carcinoma	C0009402	CAD	790	P27708	carbamoyl-phosphate synthetase 2, aspartate transcarbamylase, and dihydroorotase	Enzyme	249	0.482	0.846	0.99993	0.32		1	2	1	2003	2015
Colorectal Carcinoma	C0009402	ZKSCAN3	80317	Q9BRR0	zinc finger with KRAB and SCAN domains 3		29	0.736	0.462	1.9697e-11	0.32		1	2	0	2008	2018
Colorectal Carcinoma	C0009402	FZD4	8322	Q9ULV1	frizzled class receptor 4	G-protein coupled receptor	239	0.49	0.923	0.96962	0.32		1	2	0	2017	2018
Colorectal Carcinoma	C0009402	CD9	928	P21926	CD9 molecule		156	0.528	0.769	0.0047221	0.32		1	3	0	2014	2019
Colorectal Carcinoma	C0009402	DHRS2	10202	Q13268	dehydrogenase/reductase 2		20	0.736	0.385	8.7228e-07	0.31		1	1	1	2019	2019
Colorectal Carcinoma	C0009402	SF3A1	10291	Q15459	splicing factor 3a subunit 1	Nucleic acid binding	10	0.839	0.115	0.98752	0.31		0	1	1	2015	2015
Colorectal Carcinoma	C0009402	CD226	10666	Q15762	CD226 molecule		124	0.548	0.769	0.03921	0.31		1	1	0	2005	2005
Colorectal Carcinoma	C0009402	CHL1	10752	O00533	cell adhesion molecule L1 like		73	0.603	0.654	8.889e-12	0.31		1	1	0	2016	2016
Colorectal Carcinoma	C0009402	PTPRT	11122	O14522	protein tyrosine phosphatase receptor type T	Enzyme	53	0.636	0.538	1	0.31		1	1	4	2018	2018
Colorectal Carcinoma	C0009402	CSMD3	114788	Q7Z407	CUB and Sushi multiple domains 3		31	0.695	0.5	0.057105	0.31		1	1	2	2014	2014
Colorectal Carcinoma	C0009402	UHRF2	115426	Q96PU4	ubiquitin like with PHD and ring finger domains 2	Enzyme	33	0.7	0.308	0.99928	0.31		1	1	1	2011	2011
Colorectal Carcinoma	C0009402	LRRC3B	116135	Q96PB8	leucine rich repeat containing 3B	Receptor	31	0.695	0.308	0.44415	0.31		1	1	0	2009	2009
Colorectal Carcinoma	C0009402	COL3A1	1281	P02461	collagen type III alpha 1 chain		301	0.477	0.808	1	0.31		1	1	2	2016	2016
Colorectal Carcinoma	C0009402	ADORA1	134	P30542	adenosine A1 receptor	G-protein coupled receptor	121	0.578	0.692	0.015215	0.31		1	1	1	2017	2017
Colorectal Carcinoma	C0009402	CTBP1	1487	Q13363	C-terminal binding protein 1	Transcription factor	154	0.559	0.692	0.98442	0.31		1	1	0	2006	2006
Colorectal Carcinoma	C0009402	DDIT3	1649	P35638	DNA damage inducible transcript 3		264	0.467	0.846	0.59066	0.31		1	1	0	2014	2014
Colorectal Carcinoma	C0009402	ADAMTS18	170692	Q8TE60	ADAM metallopeptidase with thrombospondin type 1 motif 18	Enzyme	57	0.636	0.654	1.0716e-29	0.31		1	1	2	2017	2017
Colorectal Carcinoma	C0009402	DPYSL2	1808	Q16555	dihydropyrimidinase like 2	Enzyme	93	0.585	0.692	0.99375	0.31		1	1	1	2014	2014
Colorectal Carcinoma	C0009402	EIF4G1	1981	Q04637	eukaryotic translation initiation factor 4 gamma 1	Nucleic acid binding	139	0.553	0.808	1	0.31		1	1	1	2018	2018
Colorectal Carcinoma	C0009402	F5	2153	P12259	coagulation factor V	Enzyme	369	0.441	0.846	5.919e-15	0.31		1	1	0	2011	2011
Colorectal Carcinoma	C0009402	FBLN2	2199	P98095	fibulin 2	Extracellular structure	39	0.682	0.615	7.0135e-06	0.31		1	2	0	2007	2017
Colorectal Carcinoma	C0009402	FBN2	2201	P35556	fibrillin 2	Calcium-binding protein	211	0.505	0.808	1	0.31		1	2	0	2011	2012
Colorectal Carcinoma	C0009402	CD93	22918	Q9NPY3	CD93 molecule	Calcium-binding protein	36	0.663	0.5	1.9782e-10	0.31		1	1	3	2015	2015
Colorectal Carcinoma	C0009402	ACIN1	22985	Q9UKV3	apoptotic chromatin condensation inducer 1		19	0.751	0.308	1	0.31		1	1	1	2019	2019
Colorectal Carcinoma	C0009402	ZNF292	23036	O60281	zinc finger protein 292	Enzyme	53	0.695	0.423	1	0.31		1	2	0	2015	2016
Colorectal Carcinoma	C0009402	GSE1	23199	Q14687	Gse1 coiled-coil protein		20	0.78	0.231	1	0.31		1	1	2	2012	2012
Colorectal Carcinoma	C0009402	VPS13A	23230	Q96RL7	vacuolar protein sorting 13 homolog A		104	0.65	0.577	9.3125e-22	0.31		1	1	0	2012	2012
Colorectal Carcinoma	C0009402	ABCB10	23456	Q9NRK6	ATP binding cassette subfamily B member 10	Transporter	22	0.716	0.423	2.9084e-08	0.31		1	2	0	2012	2020
Colorectal Carcinoma	C0009402	LY96	23643	Q9Y6Y9	lymphocyte antigen 96	Receptor	54	0.636	0.615	7.4167e-05	0.31		1	1	0	2011	2011
Colorectal Carcinoma	C0009402	SETBP1	26040	Q9Y6X0	SET binding protein 1		257	0.503	0.808	1	0.31		1	1	1	2018	2018
Colorectal Carcinoma	C0009402	TTLL3	26140	Q9Y4R7	tubulin tyrosine ligase like 3		2	1	0.077	1.0765e-19	0.31		1	1	0	2014	2014
Colorectal Carcinoma	C0009402	GHRHR	2692	Q02643	growth hormone releasing hormone receptor	G-protein coupled receptor	90	0.568	0.692	1.0082e-07	0.31		1	1	0	2016	2016
Colorectal Carcinoma	C0009402	GLI3	2737	P10071	GLI family zinc finger 3		400	0.436	0.846	0.99999	0.31		1	1	2	2013	2013
Colorectal Carcinoma	C0009402	GRIN2A	2903	Q12879	glutamate ionotropic receptor NMDA type subunit 2A	Ion channel	212	0.522	0.808	0.99998	0.31		1	1	0	2008	2008
Colorectal Carcinoma	C0009402	BRF1	2972	Q92994	BRF1 RNA polymerase III transcription initiation factor subunit	Transcription factor	44	0.7	0.462	0.00010409	0.31		1	1	1	2018	2018
Colorectal Carcinoma	C0009402	HDC	3067	P19113	histidine decarboxylase		92	0.584	0.692	0.0041094	0.31		1	1	1	2017	2017
Colorectal Carcinoma	C0009402	HK3	3101	P52790	hexokinase 3	Kinase	12	0.805	0.154	5.599e-23	0.31		1	1	1	2016	2016
Colorectal Carcinoma	C0009402	HRH1	3269	P35367	histamine receptor H1	G-protein coupled receptor	66	0.647	0.654	1.858e-06	0.31		1	1	1	2019	2019
Colorectal Carcinoma	C0009402	APOB	338	P04114	apolipoprotein B		339	0.453	0.808	1.9234e-16	0.31		1	1	0	2017	2017
Colorectal Carcinoma	C0009402	IFNA2	3440	P01563	interferon alpha 2		355	0.442	0.885		0.31		1	2	0	1994	2017
Colorectal Carcinoma	C0009402	TNFRSF9	3604	Q07011	TNF receptor superfamily member 9		177	0.502	0.769	0.32153	0.31		1	1	1	2014	2014
Colorectal Carcinoma	C0009402	LIG3	3980	P49916	DNA ligase 3	Enzyme	47	0.641	0.654	1.439e-10	0.31		1	1	1	2016	2016
Colorectal Carcinoma	C0009402	LRP2	4036	P98164	LDL receptor related protein 2		254	0.491	0.846	0.99999	0.31		1	1	0	2019	2019
Colorectal Carcinoma	C0009402	CD46	4179	P15529	CD46 molecule		258	0.477	0.808	4.7013e-07	0.31		1	1	0	2016	2016
Colorectal Carcinoma	C0009402	NR3C2	4306	P08235	nuclear receptor subfamily 3 group C member 2	Nuclear receptor	287	0.469	0.846	0.83739	0.31		1	1	0	2013	2013
Colorectal Carcinoma	C0009402	NF1	4763	P21359	neurofibromin 1	Enzyme modulator	380	0.44	0.885	0.90175	0.31		1	1	0	2019	2019
Colorectal Carcinoma	C0009402	NFATC1	4772	O95644	nuclear factor of activated T cells 1	Transcription factor	161	0.517	0.731	0.15652	0.31		1	1	1	2016	2016
Colorectal Carcinoma	C0009402	SLC11A2	4891	P49281	solute carrier family 11 member 2	Transporter	99	0.566	0.769	0.0066528	0.31		1	1	1	2016	2016
Colorectal Carcinoma	C0009402	NRCAM	4897	Q92823	neuronal cell adhesion molecule		49	0.666	0.423	0.015254	0.31		1	3	0	2008	2011
Colorectal Carcinoma	C0009402	SDF4	51150	Q9BRK5	stromal cell derived factor 4	Calcium-binding protein	74	0.595	0.654	0.0091042	0.31		1	1	1	2011	2011
Colorectal Carcinoma	C0009402	PCSK2	5126	P16519	proprotein convertase subtilisin/kexin type 2	Enzyme	39	0.663	0.462	0.99853	0.31		1	1	1	2015	2015
Colorectal Carcinoma	C0009402	ABCB4	5244	P21439	ATP binding cassette subfamily B member 4	Transporter	157	0.529	0.615	2.2138e-07	0.31		1	2	0	2012	2018
Colorectal Carcinoma	C0009402	PKHD1	5314	P08F94	PKHD1 ciliary IPT domain containing fibrocystin/polyductin		115	0.576	0.654	1.1657e-47	0.31		1	1	2	2011	2011
Colorectal Carcinoma	C0009402	ATP7B	540	P35670	ATPase copper transporting beta	Transporter	182	0.529	0.654	4.8001e-30	0.31		1	1	0	2009	2009
Colorectal Carcinoma	C0009402	TRPM7	54822	Q96QT4	transient receptor potential cation channel subfamily M member 7	Ion channel	151	0.531	0.731	5.2086e-16	0.31		1	2	0	2007	2019
Colorectal Carcinoma	C0009402	ODAM	54959	A1E959	odontogenic, ameloblast associated		24	0.736	0.269	1.5176e-15	0.31		1	1	0	2016	2016
Colorectal Carcinoma	C0009402	PRSS1	5644	P07477	serine protease 1	Enzyme	117	0.563	0.692	4.1384e-11	0.31		1	1	1	2018	2018
Colorectal Carcinoma	C0009402	CD248	57124	Q9HCU0	CD248 molecule		76	0.615	0.577	0.059017	0.31		1	1	0	2005	2005
Colorectal Carcinoma	C0009402	ADAMTSL3	57188	P82987	ADAMTS like 3	Enzyme	35	0.729	0.346	1.3662e-19	0.31		1	1	3	2007	2007
Colorectal Carcinoma	C0009402	RARB	5915	P10826	retinoic acid receptor beta	Nuclear receptor	254	0.478	0.846	0.99983	0.31		1	1	0	2008	2008
Colorectal Carcinoma	C0009402	RASGRF2	5924	O14827	Ras protein specific guanine nucleotide releasing factor 2	Enzyme modulator	56	0.644	0.615	0.15243	0.31		1	1	1	2019	2019
Colorectal Carcinoma	C0009402	GNB4	59345	Q9HAV0	G protein subunit beta 4	Enzyme	25	0.751	0.346	0.0023672	0.31		1	2	0	2007	2009
Colorectal Carcinoma	C0009402	RHEB	6009	Q15382	Ras homolog, mTORC1 binding	Enzyme modulator	53	0.631	0.577	0.98119	0.31		1	1	0	2020	2020
Colorectal Carcinoma	C0009402	SFRP5	6425	Q5T4F7	secreted frizzled related protein 5		106	0.559	0.692	5.1843e-06	0.31		1	2	0	2007	2010
Colorectal Carcinoma	C0009402	SKIV2L	6499	Q15477	Ski2 like RNA helicase		96	0.615	0.654	1.2931e-22	0.31		1	1	1	2018	2018
Colorectal Carcinoma	C0009402	FOXL2	668	P58012	forkhead box L2	Transcription factor	137	0.542	0.692	0.87762	0.31		1	2	0	2007	2017
Colorectal Carcinoma	C0009402	TXNRD1	7296	Q16881	thioredoxin reductase 1	Enzyme	136	0.529	0.692	1.6062e-06	0.31		1	2	0	2008	2020
Colorectal Carcinoma	C0009402	UNG	7374	P13051	uracil DNA glycosylase		66	0.617	0.654	0.0017247	0.31		1	2	0	2005	2006
Colorectal Carcinoma	C0009402	UQCRC2	7385	P22695	ubiquinol-cytochrome c reductase core protein 2	Enzyme	28	0.722	0.346	2.8623e-06	0.31		1	1	0	2018	2018
Colorectal Carcinoma	C0009402	KDM6A	7403	O15550	lysine demethylase 6A	Epigenetic regulator	238	0.498	0.769	1	0.31		1	1	0	2017	2017
Colorectal Carcinoma	C0009402	ST8SIA4	7903	Q92187	ST8 alpha-N-acetyl-neuraminide alpha-2,8-sialyltransferase 4		117	0.546	0.846	0.00040145	0.31		1	1	0	2013	2013
Colorectal Carcinoma	C0009402	ANP32A	8125	P39687	acidic nuclear phosphoprotein 32 family member A	Enzyme modulator	47	0.674	0.577	0.98961	0.31		1	2	0	2015	2017
Colorectal Carcinoma	C0009402	OBSCN	84033	Q5VST9	obscurin, cytoskeletal calmodulin and titin-interacting RhoGEF	Kinase	27	0.736	0.538	1.8605e-164	0.31		1	1	5	2012	2012
Colorectal Carcinoma	C0009402	CDC14A	8556	Q9UNH5	cell division cycle 14A		26	0.736	0.385	9.6376e-08	0.31		1	1	0	2010	2010
Colorectal Carcinoma	C0009402	RUNX1T1	862	Q06455	RUNX1 partner transcriptional co-repressor 1	Transcription factor	137	0.53	0.808	0.97768	0.31		1	1	3	2016	2016
Colorectal Carcinoma	C0009402	ADAM19	8728	Q9H013	ADAM metallopeptidase domain 19	Enzyme	45	0.659	0.538	6.8e-05	0.31		1	1	2	2015	2015
Colorectal Carcinoma	C0009402	LDB1	8861	Q86U70	LIM domain binding 1	Transcription factor	23	0.736	0.385	0.98529	0.31		1	1	1	2016	2016
Colorectal Carcinoma	C0009402	FOXH1	8928	O75593	forkhead box H1		67	0.615	0.654	0.041555	0.31		1	1	2	2019	2019
Colorectal Carcinoma	C0009402	NEURL1	9148	O76050	neuralized E3 ubiquitin protein ligase 1	Enzyme	103	0.556	0.538	0.011091	0.31		1	2	0	2005	2007
Colorectal Carcinoma	C0009402	CABLES1	91768	Q8TDN4	Cdk5 and Abl enzyme substrate 1		45	0.7	0.385	0.0054966	0.31		1	1	0	2007	2007
Colorectal Carcinoma	C0009402	OTOP2	92736	Q7RTS6	otopetrin 2	Transporter	8	0.861	0.269	3.5925e-14	0.31		1	1	1	2019	2019
Colorectal Carcinoma	C0009402	DMKN	93099	Q6E0U4	dermokine		20	0.729	0.308	8.3445e-13	0.31		1	1	0	2010	2010
Colorectal Carcinoma	C0009402	PPP1R14A	94274	Q96A00	protein phosphatase 1 regulatory inhibitor subunit 14A		28	0.716	0.423	0.12672	0.31		1	2	0	2007	2017
Colorectal Carcinoma	C0009402	NCR1	9437	O76036	natural cytotoxicity triggering receptor 1	Receptor	96	0.572	0.654	7.3311e-11	0.31		1	1	0	2019	2019
Colorectal Carcinoma	C0009402	QKI	9444	Q96PU8	QKI, KH domain containing RNA binding	Nucleic acid binding	61	0.617	0.5	0.75121	0.31		1	1	1	2017	2017
Colorectal Carcinoma	C0009402	CDH5	1003	P33151	cadherin 5		103	0.561	0.692	0.51314	0.3		1	1	0	2008	2008
Colorectal Carcinoma	C0009402	MIR1273C	100422821		microRNA 1273c		5	1	0.077		0.3		1	1	0	2015	2015
Colorectal Carcinoma	C0009402	LINC00673	100499467		long intergenic non-protein coding RNA 673		39	0.659	0.462		0.3		1	1	1	2019	2019
Colorectal Carcinoma	C0009402	CDH7	1005	Q9ULB5	cadherin 7		18	0.769	0.231	0.5975	0.3		1	1	0	2005	2005
Colorectal Carcinoma	C0009402	PQBP1	10084	O60828	polyglutamine binding protein 1	Transcription factor	118	0.57	0.654	0.78935	0.3			0	0
Colorectal Carcinoma	C0009402	CALCOCO2	10241	Q13137	calcium binding and coiled-coil domain 2		21	0.722	0.423	0.0001027	0.3		1	1	0	2015	2015
Colorectal Carcinoma	C0009402	EFS	10278	O43281	embryonal Fyn-associated substrate		75	0.597	0.615	1.8222e-08	0.3			0	1
Colorectal Carcinoma	C0009402	BCAS2	10286	O75934	BCAS2 pre-mRNA processing factor	Nucleic acid binding	17	0.769	0.269	2.7764e-08	0.3			0	1
Colorectal Carcinoma	C0009402	TFG	10342	Q92734	trafficking from ER to golgi regulator		104	0.595	0.615	0.14061	0.3			0	0
Colorectal Carcinoma	C0009402	ABCA10	10349	Q8WWZ4	ATP binding cassette subfamily A member 10	Transporter	3	1	0.077	7.6593e-34	0.3		1	1	0	2012	2012
Colorectal Carcinoma	C0009402	ABCA9	10350	Q8IUA7	ATP binding cassette subfamily A member 9	Transporter	7	0.839	0.154	9.4911e-48	0.3		1	1	0	2012	2012
Colorectal Carcinoma	C0009402	ABCA8	10351	O94911	ATP binding cassette subfamily A member 8	Transporter	13	0.821	0.231	1.609e-52	0.3		1	1	0	2012	2012
Colorectal Carcinoma	C0009402	CORO2B	10391	Q9UQ03	coronin 2B	Cellular structure	6	0.89	0.192	0.056849	0.3			0	1
Colorectal Carcinoma	C0009402	ZNHIT1	10467	O43257	zinc finger HIT-type containing 1	Transcription factor	6	0.89	0.115	2.3592e-06	0.3			0	1
Colorectal Carcinoma	C0009402	UNC13B	10497	O14795	unc-13 homolog B		16	0.769	0.385	3.153e-17	0.3			0	0
Colorectal Carcinoma	C0009402	ADARB2	105	Q9NS39	adenosine deaminase RNA specific B2 (inactive)	Enzyme	33	0.716	0.308	0.85603	0.3			0	1
Colorectal Carcinoma	C0009402	ARFGEF1	10565	Q9Y6D6	ADP ribosylation factor guanine nucleotide exchange factor 1		34	0.674	0.423	1	0.3			0	0
Colorectal Carcinoma	C0009402	AKAP3	10566	O75969	A-kinase anchoring protein 3		15	0.736	0.269	0.056438	0.3			0	1
Colorectal Carcinoma	C0009402	GNB5	10681	O14775	G protein subunit beta 5	Enzyme	29	0.736	0.308	6.3614e-08	0.3		1	1	0	2015	2015
Colorectal Carcinoma	C0009402	ALDH1L1	10840	O75891	aldehyde dehydrogenase 1 family member L1	Enzyme	49	0.663	0.615	1.4114e-11	0.3			0	1
Colorectal Carcinoma	C0009402	DSTN	11034	P60981	destrin, actin depolymerizing factor		48	0.644	0.692	0.55116	0.3			0	0
Colorectal Carcinoma	C0009402	ADAM29	11086	Q9UKF5	ADAM metallopeptidase domain 29	Enzyme	15	0.76	0.269		0.3			0	2
Colorectal Carcinoma	C0009402	ERI2	112479	A8K979	ERI1 exoribonuclease family member 2		1	1	0.077	5.0234e-10	0.3			0	1
Colorectal Carcinoma	C0009402	TP53TG1	11257		TP53 target 1		16	0.792	0.269		0.3		1	1	0	2007	2007
Colorectal Carcinoma	C0009402	ADCY8	114	P40145	adenylate cyclase 8		29	0.705	0.577	1.7766e-06	0.3			0	0
Colorectal Carcinoma	C0009402	SLC22A9	114571	Q8IVM8	solute carrier family 22 member 9	Transporter	4	0.89	0.269	4.2676e-19	0.3			0	1
Colorectal Carcinoma	C0009402	OMA1	115209	Q96E52	OMA1 zinc metallopeptidase	Enzyme	24	0.716	0.462	1.2241e-11	0.3			0	0
Colorectal Carcinoma	C0009402	C8orf34	116328	Q49A92	chromosome 8 open reading frame 34		7	0.931	0.154	1.4855e-12	0.3			0	0
Colorectal Carcinoma	C0009402	CSNK1A1L	122011	Q8N752	casein kinase 1 alpha 1 like	Kinase	1	1	0.077	0.013174	0.3			0	1
Colorectal Carcinoma	C0009402	SPACA7	122258	Q96KW9	sperm acrosome associated 7		1	1	0.077	1.329e-06	0.3			0	1
Colorectal Carcinoma	C0009402	B4GALNT2	124872	Q8NHY0	beta-1,4-N-acetyl-galactosaminyltransferase 2		19	0.751	0.385	1.7413e-17	0.3			0	0
Colorectal Carcinoma	C0009402	CYB5D2	124936	Q8WUJ1	cytochrome b5 domain containing 2	Signaling	17	0.76	0.269	4.4253e-06	0.3			0	1
Colorectal Carcinoma	C0009402	NLRP8	126205	Q86W28	NLR family pyrin domain containing 8		2	0.931	0.115	6.0834e-25	0.3			0	0
Colorectal Carcinoma	C0009402	KDF1	126695	Q8NAX2	keratinocyte differentiation factor 1		33	0.729	0.269	0.15422	0.3			0	1
Colorectal Carcinoma	C0009402	CNTN1	1272	Q12860	contactin 1		81	0.599	0.577	0.15131	0.3			0	0
Colorectal Carcinoma	C0009402	COL4A6	1288	Q14031	collagen type IV alpha 6 chain		43	0.686	0.423	0.89901	0.3			0	0
Colorectal Carcinoma	C0009402	COL7A1	1294	Q02388	collagen type VII alpha 1 chain	Receptor	160	0.545	0.808	2.4411e-40	0.3		1	1	0	2008	2008
Colorectal Carcinoma	C0009402	CPO	130749	Q8IVL8	carboxypeptidase O	Enzyme	15	0.736	0.538	7.271e-21	0.3			0	1
Colorectal Carcinoma	C0009402	EVC2	132884	Q86UK5	EvC ciliary complex subunit 2		106	0.585	0.692	1.0207e-34	0.3			0	0
Colorectal Carcinoma	C0009402	ZNF572	137209	Q7Z3I7	zinc finger protein 572		1	1	0.077	0.012997	0.3			0	0
Colorectal Carcinoma	C0009402	ADORA3	140	P0DMS8	adenosine A3 receptor	G-protein coupled receptor	36	0.682	0.5	0.0001441	0.3			0	1
Colorectal Carcinoma	C0009402	FRMPD2	143162	Q68DX3	FERM and PDZ domain containing 2		5	0.839	0.269	1.5123e-32	0.3			0	1
Colorectal Carcinoma	C0009402	SYT9	143425	Q86SS6	synaptotagmin 9	Transporter	11	0.821	0.269	0.30911	0.3			0	0
Colorectal Carcinoma	C0009402	PHETA1	144717	Q8N4B1	PH domain containing endocytic trafficking adaptor 1		11	0.805	0.385	0.010042	0.3		1	1	0	2015	2015
Colorectal Carcinoma	C0009402	ZNF480	147657	Q8WV37	zinc finger protein 480		2	0.931	0.115	0.03557	0.3			0	0
Colorectal Carcinoma	C0009402	ZNF560	147741	Q96MR9	zinc finger protein 560	Transcription factor	2	0.931	0.077	9.6685e-06	0.3			0	0
Colorectal Carcinoma	C0009402	ZNF569	148266	Q5MCW4	zinc finger protein 569		42	0.666	0.538	6.5987e-08	0.3		1	1	0	2011	2011
Colorectal Carcinoma	C0009402	ABCC13	150000		ATP binding cassette subfamily C member 13 (pseudogene)		2	1	0.077		0.3		1	1	0	2012	2012
Colorectal Carcinoma	C0009402	PUS10	150962	Q3MIT2	pseudouridine synthase 10		17	0.736	0.346	7.8796e-14	0.3			0	1
Colorectal Carcinoma	C0009402	CTSH	1512	P09668	cathepsin H	Enzyme	63	0.626	0.654	1.2518e-08	0.3			0	0
Colorectal Carcinoma	C0009402	C2CD6	151254	Q53TS8	C2 calcium dependent domain containing 6		3	0.931	0.115	2.9765e-16	0.3			0	0
Colorectal Carcinoma	C0009402	WDR49	151790	Q8IV35	WD repeat domain 49		2	0.931	0.115	1.0465e-19	0.3			0	1
Colorectal Carcinoma	C0009402	CNTN4	152330	Q8IWV2	contactin 4	Receptor	58	0.653	0.577	3.3013e-06	0.3			0	0
Colorectal Carcinoma	C0009402	JAKMIP1	152789	Q96N16	janus kinase and microtubule interacting protein 1		6	0.839	0.269	0.99986	0.3			0	1
Colorectal Carcinoma	C0009402	ABCA13	154664	Q86UQ4	ATP binding cassette subfamily A member 13	Transporter	26	0.722	0.308	8.7753e-114	0.3		1	1	0	2012	2012
Colorectal Carcinoma	C0009402	IQUB	154865	Q8NA54	IQ motif and ubiquitin domain containing		5	0.861	0.115	1.7274e-14	0.3			0	1
Colorectal Carcinoma	C0009402	ERICH1	157697	Q86X53	glutamate rich 1		2	0.931	0.192	1.1389e-14	0.3			0	1
Colorectal Carcinoma	C0009402	ZNF540	163255	Q8NDQ6	zinc finger protein 540		1	1	0.077	0.39014	0.3			0	0
Colorectal Carcinoma	C0009402	LONRF2	164832	Q1L5Z9	LON peptidase N-terminal domain and ring finger 2	Enzyme	5	1	0.077	0.0011706	0.3			0	1
Colorectal Carcinoma	C0009402	DEFA4	1669	P12838	defensin alpha 4		5	0.861	0.231	0.49798	0.3			0	1
Colorectal Carcinoma	C0009402	UGT3A2	167127	Q3SY77	UDP glycosyltransferase family 3 member A2		1	1	0.077	7.1897e-10	0.3			0	1
Colorectal Carcinoma	C0009402	HTR3C	170572	Q8WXA8	5-hydroxytryptamine receptor 3C	Ion channel	16	0.769	0.192	2.5562e-10	0.3			0	1
Colorectal Carcinoma	C0009402	DLG3	1741	Q92796	discs large MAGUK scaffold protein 3		144	0.544	0.615	0.99999	0.3			0	1
Colorectal Carcinoma	C0009402	DMD	1756	P11532	dystrophin		484	0.423	0.923	1	0.3			0	0
Colorectal Carcinoma	C0009402	DNAH8	1769	Q96JB1	dynein axonemal heavy chain 8	Enzyme	120	0.556	0.731	1.1489e-60	0.3			0	0
Colorectal Carcinoma	C0009402	DNASE1L3	1776	Q13609	deoxyribonuclease 1 like 3		126	0.575	0.769	3.0012e-05	0.3			0	0
Colorectal Carcinoma	C0009402	DPAGT1	1798	Q9H3H5	dolichyl-phosphate N-acetylglucosaminephosphotransferase 1	Enzyme	94	0.621	0.538	1.117e-05	0.3		1	1	0	2015	2015
Colorectal Carcinoma	C0009402	EDA	1896	Q92838	ectodysplasin A		150	0.553	0.808	0.97391	0.3			0	0
Colorectal Carcinoma	C0009402	VSTM4	196740	Q8IW00	V-set and transmembrane domain containing 4		8	0.931	0.115	0.033816	0.3			0	1
Colorectal Carcinoma	C0009402	SPAG17	200162	Q6Q759	sperm associated antigen 17		13	0.769	0.308	1.1892e-24	0.3			0	0
Colorectal Carcinoma	C0009402	AMZ2P1	201283		archaelysin family metallopeptidase 2 pseudogene 1		2	1	0.077		0.3		1	1	0	2015	2015
Colorectal Carcinoma	C0009402	SPNS3	201305	Q6ZMD2	sphingolipid transporter 3 (putative)	Transporter	1	1	0.077	1.7173e-12	0.3			0	1
Colorectal Carcinoma	C0009402	PDILT	204474	Q8N807	protein disulfide isomerase like, testis expressed		14	0.839	0.231	1.2202e-05	0.3			0	1
Colorectal Carcinoma	C0009402	ABCA3	21	Q99758	ATP binding cassette subfamily A member 3	Transporter	84	0.592	0.615	6.6226e-08	0.3		1	1	0	2012	2012
Colorectal Carcinoma	C0009402	ETFDH	2110	Q16134	electron transfer flavoprotein dehydrogenase	Enzyme	59	0.678	0.462	2.778e-13	0.3			0	1
Colorectal Carcinoma	C0009402	ETV1	2115	P50549	ETS variant transcription factor 1	Transcription factor	62	0.631	0.385	0.93694	0.3		1	1	0	2018	2018
Colorectal Carcinoma	C0009402	FANCG	2189	O15287	FA complementation group G		132	0.556	0.769	2.4859e-14	0.3			0	1
Colorectal Carcinoma	C0009402	AMER2	219287	Q8N7J2	APC membrane recruitment protein 2		3	0.89	0.192	0.083487	0.3			0	0
Colorectal Carcinoma	C0009402	GJD4	219770	Q96KN9	gap junction protein delta 4	Cell-cell junction	1	1	0.077	0.014965	0.3			0	1
Colorectal Carcinoma	C0009402	FCN1	2219	O00602	ficolin 1	Signaling	43	0.647	0.577	3.9675e-17	0.3			0	0
Colorectal Carcinoma	C0009402	FCN2	2220	Q15485	ficolin 2	Signaling	159	0.517	0.846	3.5646e-11	0.3			0	0
Colorectal Carcinoma	C0009402	FERD3L	222894	Q96RJ6	Fer3 like bHLH transcription factor		6	0.839	0.192	0.31875	0.3			0	1
Colorectal Carcinoma	C0009402	ITPRID1	223075	Q6ZRS4	ITPR interacting domain containing 1		3	0.89	0.115	6.5498e-36	0.3			0	0
Colorectal Carcinoma	C0009402	ABCD2	225	Q9UBJ2	ATP binding cassette subfamily D member 2	Transporter	25	0.711	0.5	4.7079e-06	0.3		1	1	0	2012	2012
Colorectal Carcinoma	C0009402	FHL3	2275	Q13643	four and a half LIM domains 3	Transcription factor	22	0.736	0.269	0.0017791	0.3		1	1	0	2019	2019
Colorectal Carcinoma	C0009402	TFEC	22797	O14948	transcription factor EC		9	0.861	0.231	4.2824e-08	0.3			0	0
Colorectal Carcinoma	C0009402	PPM1E	22843	Q8WY54	protein phosphatase, Mg2+/Mn2+ dependent 1E	Enzyme	14	0.805	0.192	0.98758	0.3		1	1	0	2011	2011
Colorectal Carcinoma	C0009402	CNKSR2	22866	Q8WXI2	connector enhancer of kinase suppressor of Ras 2		96	0.628	0.538	0.99996	0.3			0	1
Colorectal Carcinoma	C0009402	DIP2C	22982	Q9Y2E4	disco interacting protein 2 homolog C		10	0.805	0.192	1	0.3			0	1
Colorectal Carcinoma	C0009402	KDM2A	22992	Q9Y2K7	lysine demethylase 2A		53	0.636	0.423	1	0.3		1	1	0	2015	2015
Colorectal Carcinoma	C0009402	SNRNP200	23020	O75643	small nuclear ribonucleoprotein U5 subunit 200		44	0.695	0.5	1	0.3			0	0
Colorectal Carcinoma	C0009402	MCF2L2	23101	Q86YR7	MCF.2 cell line derived transforming sequence-like 2	Signaling	60	0.628	0.577	1.1565e-24	0.3			0	1
Colorectal Carcinoma	C0009402	NCDN	23154	Q9UBB6	neurochondrin		8	0.89	0.231	0.99964	0.3			0	1
Colorectal Carcinoma	C0009402	LPIN1	23175	Q14693	lipin 1		86	0.601	0.692	6.4522e-13	0.3			0	0
Colorectal Carcinoma	C0009402	FLNC	2318	Q14315	filamin C		132	0.568	0.615	0.99994	0.3		1	1	0	2011	2011
Colorectal Carcinoma	C0009402	CAMSAP2	23271	Q08AD1	calmodulin regulated spectrin associated protein family member 2		8	0.792	0.231	0.99999	0.3			0	0
Colorectal Carcinoma	C0009402	AGTPBP1	23287	Q9UPW5	ATP/GTP binding protein 1	Enzyme	63	0.65	0.538	0.42151	0.3			0	0
Colorectal Carcinoma	C0009402	KCNH4	23415	Q9UQ05	potassium voltage-gated channel subfamily H member 4	Ion channel	61	0.603	0.615	0.99984	0.3			0	0
Colorectal Carcinoma	C0009402	ABCA6	23460	Q8N139	ATP binding cassette subfamily A member 6	Transporter	19	0.861	0.231	5.1099e-27	0.3		1	1	0	2012	2012
Colorectal Carcinoma	C0009402	ABCA5	23461	Q8WWZ7	ATP binding cassette subfamily A member 5	Transporter	28	0.736	0.423	4.7803e-27	0.3		1	1	0	2012	2012
Colorectal Carcinoma	C0009402	CBX5	23468	P45973	chromobox 5	Epigenetic regulator	59	0.621	0.731	0.93174	0.3		1	1	0	2015	2015
Colorectal Carcinoma	C0009402	PIK3R5	23533	Q8WYR1	phosphoinositide-3-kinase regulatory subunit 5		51	0.7	0.5	0.30013	0.3			0	1
Colorectal Carcinoma	C0009402	RAB38	23682	P57729	RAB38, member RAS oncogene family		34	0.691	0.5	0.0019671	0.3			0	0
Colorectal Carcinoma	C0009402	NPAP1	23742	Q9NZP6	nuclear pore associated protein 1	Nucleic acid binding	66	0.67	0.5		0.3			0	2
Colorectal Carcinoma	C0009402	EML2	24139	O95834	EMAP like 2		8	0.821	0.192	5.7633e-19	0.3			0	1
Colorectal Carcinoma	C0009402	TTLL10	254173	Q6ZVT0	tubulin tyrosine ligase like 10		1	1	0.077	1.2286e-11	0.3			0	1
Colorectal Carcinoma	C0009402	GABPB1	2553	Q06547	GA binding protein transcription factor subunit beta 1		16	0.743	0.346	0.91121	0.3			0	0
Colorectal Carcinoma	C0009402	GABRA6	2559	Q16445	gamma-aminobutyric acid type A receptor subunit alpha6	Ion channel	37	0.678	0.423	1.336e-12	0.3			0	0
Colorectal Carcinoma	C0009402	FBXL2	25827	Q9UKC9	F-box and leucine rich repeat protein 2		17	0.751	0.269	0.0075282	0.3			0	0
Colorectal Carcinoma	C0009402	GALNS	2588	P34059	galactosamine (N-acetyl)-6-sulfatase	Enzyme	138	0.56	0.808	2.9611e-10	0.3			0	0
Colorectal Carcinoma	C0009402	ZZZ3	26009	Q8IYH5	zinc finger ZZ-type containing 3	Transcription factor	2	0.931	0.154	0.99998	0.3			0	0
Colorectal Carcinoma	C0009402	RPAP1	26015	Q9BWH6	RNA polymerase II associated protein 1		7	0.89	0.115	1.3781e-17	0.3			0	1
Colorectal Carcinoma	C0009402	EDRF1	26098	Q3B7T1	erythroid differentiation regulatory factor 1		1	1	0.077	0.0043677	0.3			0	1
Colorectal Carcinoma	C0009402	ABCA12	26154	Q86UK0	ATP binding cassette subfamily A member 12	Transporter	85	0.61	0.654	2.922e-15	0.3		1	1	0	2012	2012
Colorectal Carcinoma	C0009402	CABYR	26256	O75952	calcium binding tyrosine phosphorylation regulated		14	0.792	0.192	2.258e-06	0.3		1	1	0	2007	2007
Colorectal Carcinoma	C0009402	SACS	26278	Q9NZJ4	sacsin molecular chaperone		106	0.606	0.654	1.0852e-23	0.3			0	0
Colorectal Carcinoma	C0009402	AMPD1	270	P23109	adenosine monophosphate deaminase 1	Enzyme	106	0.573	0.692	1.9099e-21	0.3			0	0
Colorectal Carcinoma	C0009402	CNPPD1	27013	Q9BV87	cyclin Pas1/PHO80 domain containing 1		4	0.931	0.115	7.6384e-09	0.3		1	1	0	2015	2015
Colorectal Carcinoma	C0009402	SIGLEC7	27036	Q9Y286	sialic acid binding Ig like lectin 7	Receptor	137	0.535	0.846	2.388e-07	0.3			0	0
Colorectal Carcinoma	C0009402	SDCBP2	27111	Q9H190	syndecan binding protein 2	Transporter	8	0.839	0.308	3.6357e-07	0.3			0	1
Colorectal Carcinoma	C0009402	CPAMD8	27151	Q8IZJ3	C3 and PZP like alpha-2-macroglobulin domain containing 8	Enzyme modulator	24	0.722	0.231	6.9237e-23	0.3		1	1	0	2011	2011
Colorectal Carcinoma	C0009402	SALL3	27164	Q9BXA9	spalt like transcription factor 3	Transcription factor	24	0.729	0.385	0.40326	0.3			0	0
Colorectal Carcinoma	C0009402	PCDH11X	27328	Q9BZA7	protocadherin 11 X-linked		18	0.729	0.308	0.015836	0.3			0	1
Colorectal Carcinoma	C0009402	STK32C	282974	Q86UX6	serine/threonine kinase 32C	Kinase	15	0.76	0.346	0.20408	0.3			0	1
Colorectal Carcinoma	C0009402	NPBWR2	2832	P48146	neuropeptides B and W receptor 2	G-protein coupled receptor	2	0.931	0.192	9.2479e-05	0.3			0	1
Colorectal Carcinoma	C0009402	ACTL9	284382	Q8TC94	actin like 9	Cellular structure	4	0.861	0.192	0.0040543	0.3			0	1
Colorectal Carcinoma	C0009402	ATP11C	286410	Q8NB49	ATPase phospholipid transporting 11C	Transporter	15	0.751	0.269	0.9997	0.3			0	0
Colorectal Carcinoma	C0009402	ANK2	287	Q01484	ankyrin 2		71	0.626	0.538	1	0.3			0	0
Colorectal Carcinoma	C0009402	GRID1	2894	Q9ULK0	glutamate ionotropic receptor delta type subunit 1	Ion channel	22	0.743	0.385	0.99931	0.3		1	1	0	2011	2011
Colorectal Carcinoma	C0009402	GRID2	2895	O43424	glutamate ionotropic receptor delta type subunit 2	Ion channel	50	0.67	0.5	1	0.3			0	0
Colorectal Carcinoma	C0009402	GRIK3	2899	Q13003	glutamate ionotropic receptor kainate type subunit 3	Ion channel	35	0.674	0.538	0.99998	0.3			0	1
Colorectal Carcinoma	C0009402	GRM1	2911	Q13255	glutamate metabotropic receptor 1	G-protein coupled receptor	172	0.528	0.808	0.14279	0.3			0	1
Colorectal Carcinoma	C0009402	SNX8	29886	Q9Y5X2	sorting nexin 8		14	0.792	0.231	0.062391	0.3			0	0
Colorectal Carcinoma	C0009402	ANAPC4	29945	Q9UJX5	anaphase promoting complex subunit 4		14	0.861	0.154	0.00069453	0.3			0	0
Colorectal Carcinoma	C0009402	PDZRN4	29951	Q6ZMN7	PDZ domain containing ring finger 4		25	0.805	0.269	9.1425e-07	0.3			0	0
Colorectal Carcinoma	C0009402	DONSON	29980	Q9NYP3	downstream neighbor of SON		55	0.636	0.538	1.319e-07	0.3		1	1	0	2015	2015
Colorectal Carcinoma	C0009402	H1-4	3008	P10412	H1.4 linker histone, cluster member	Nucleic acid binding	34	0.682	0.385	0.18608	0.3			0	1
Colorectal Carcinoma	C0009402	H1-5	3009	P16401	H1.5 linker histone, cluster member	Nucleic acid binding	6	0.839	0.192	0.57467	0.3			0	0
Colorectal Carcinoma	C0009402	NT5C	30833	Q8TCD5	5', 3'-nucleotidase, cytosolic		25	0.729	0.231	0.0027292	0.3		1	1	0	2005	2005
Colorectal Carcinoma	C0009402	KRT73	319101	Q86Y46	keratin 73		4	0.861	0.192	7.1972e-12	0.3			0	2
Colorectal Carcinoma	C0009402	HOXC9	3225	P31274	homeobox C9		25	0.691	0.346	0.012993	0.3			0	0
Colorectal Carcinoma	C0009402	HOXD1	3231	Q9GZZ0	homeobox D1		28	0.78	0.231	0.0031828	0.3		1	1	0	2007	2007
Colorectal Carcinoma	C0009402	HOXD9	3235	P28356	homeobox D9		34	0.67	0.462	0.017004	0.3		1	1	0	2015	2015
Colorectal Carcinoma	C0009402	HTR5A	3361	P47898	5-hydroxytryptamine receptor 5A	G-protein coupled receptor	25	0.716	0.231	0.0062906	0.3			0	1
Colorectal Carcinoma	C0009402	CD300E	342510	Q496F6	CD300e molecule		3	0.931	0.077	0.023692	0.3			0	1
Colorectal Carcinoma	C0009402	IPP	3652	Q9Y573	intracisternal A particle-promoted polypeptide		19	0.76	0.308	2.0966e-05	0.3		1	1	0	2015	2015
Colorectal Carcinoma	C0009402	ISLR	3671	O14498	immunoglobulin superfamily containing leucine rich repeat	Receptor	3	0.931	0.192	0.018643	0.3			0	1
Colorectal Carcinoma	C0009402	ABCC6	368	O95255	ATP binding cassette subfamily C member 6	Transporter	181	0.54	0.654	5.6167e-35	0.3		1	1	0	2012	2012
Colorectal Carcinoma	C0009402	KCNA10	3744	Q16322	potassium voltage-gated channel subfamily A member 10	Ion channel	5	0.931	0.077	0.00083822	0.3			0	1
Colorectal Carcinoma	C0009402	KCND3	3752	Q9UK17	potassium voltage-gated channel subfamily D member 3	Ion channel	94	0.619	0.615	0.98972	0.3			0	1
Colorectal Carcinoma	C0009402	KRTAP10-8	386681	P60410	keratin associated protein 10-8		2	0.931	0.115	3.2911e-05	0.3			0	0
Colorectal Carcinoma	C0009402	RASL11A	387496	Q6T310	RAS like family 11 member A		5	0.89	0.115	1.592e-06	0.3		1	1	0	2018	2018
Colorectal Carcinoma	C0009402	CCDC9B	388115	Q6ZUT6	coiled-coil domain containing 9B		1	1	0.077	1.405e-13	0.3			0	0
Colorectal Carcinoma	C0009402	CFAP77	389799	Q6ZQR2	cilia and flagella associated protein 77		2	0.931	0.154	1.693e-07	0.3			0	1
Colorectal Carcinoma	C0009402	LAMB3	3914	Q13751	laminin subunit beta 3	Enzyme modulator	115	0.558	0.692	2.3136e-15	0.3			0	1
Colorectal Carcinoma	C0009402	LIG1	3978	P18858	DNA ligase 1	Enzyme	30	0.678	0.5	0.0042142	0.3			0	2
Colorectal Carcinoma	C0009402	C12orf76	400073	Q8N812	chromosome 12 open reading frame 76		3	0.931	0.115	9.8749e-07	0.3			0	0
Colorectal Carcinoma	C0009402	LMO7	4008	Q8WWI1	LIM domain 7		25	0.722	0.5	0.00024661	0.3			0	0
Colorectal Carcinoma	C0009402	AMTN	401138	Q6UX39	amelotin		8	0.792	0.192	8.1348e-11	0.3			0	1
Colorectal Carcinoma	C0009402	MAF	4094	O75444	MAF bZIP transcription factor	Transcription factor	71	0.623	0.769	0.74382	0.3		1	1	0	2019	2019
Colorectal Carcinoma	C0009402	MAP1B	4131	P46821	microtubule associated protein 1B	Cellular structure	59	0.628	0.5	1	0.3			0	2
Colorectal Carcinoma	C0009402	MAP2	4133	P11137	microtubule associated protein 2		126	0.537	0.692	1	0.3			0	1
Colorectal Carcinoma	C0009402	MYO1B	4430	O43795	myosin IB	Cellular structure	36	0.691	0.538	7.2357e-05	0.3			0	0
Colorectal Carcinoma	C0009402	NDUFA1	4694	O15239	NADH:ubiquinone oxidoreductase subunit A1		74	0.636	0.423	0.55315	0.3			0	1
Colorectal Carcinoma	C0009402	NELL1	4745	Q92832	neural EGFL like 1	Calcium-binding protein	122	0.539	0.731	8.6694e-12	0.3			0	0
Colorectal Carcinoma	C0009402	NID1	4811	P14543	nidogen 1		54	0.631	0.577	7.2197e-12	0.3			0	0
Colorectal Carcinoma	C0009402	NODAL	4838	Q96S42	nodal growth differentiation factor	Signaling	89	0.588	0.731	0.97028	0.3			0	1
Colorectal Carcinoma	C0009402	OSBP	5007	P22059	oxysterol binding protein		29	0.705	0.346	0.99855	0.3			0	0
Colorectal Carcinoma	C0009402	OVGP1	5016	Q12889	oviductal glycoprotein 1		21	0.729	0.538	0.00067299	0.3			0	0
Colorectal Carcinoma	C0009402	SHANK1	50944	Q9Y566	SH3 and multiple ankyrin repeat domains 1		35	0.678	0.385	1	0.3			0	1
Colorectal Carcinoma	C0009402	TBX22	50945	Q9Y458	T-box transcription factor 22	Transcription factor	72	0.603	0.577	0.97704	0.3			0	1
Colorectal Carcinoma	C0009402	AMDHD2	51005	Q9Y303	amidohydrolase domain containing 2	Enzyme	1	1	0.077	0.002313	0.3			0	1
Colorectal Carcinoma	C0009402	TNNI3K	51086	Q59H18	TNNI3 interacting kinase		50	0.691	0.346	3.0654e-48	0.3			0	0
Colorectal Carcinoma	C0009402	ZDHHC2	51201	Q9UIJ5	zinc finger DHHC-type palmitoyltransferase 2		24	0.729	0.462	0.0010008	0.3			0	1
Colorectal Carcinoma	C0009402	ELOA2	51224	Q8IYF1	elongin A2		1	1	0.077		0.3			0	1
Colorectal Carcinoma	C0009402	PAIP2	51247	Q9BPZ3	poly(A) binding protein interacting protein 2		7	0.89	0.077	0.55414	0.3		1	1	0	2015	2015
Colorectal Carcinoma	C0009402	WAC	51322	Q9BTA9	WW domain containing adaptor with coiled-coil		68	0.686	0.615	1	0.3			0	0
Colorectal Carcinoma	C0009402	WNT16	51384	Q9UBV4	Wnt family member 16	Signaling	29	0.686	0.654	1.6523e-06	0.3			0	0
Colorectal Carcinoma	C0009402	CINP	51550	Q9BW66	cyclin dependent kinase 2 interacting protein		15	0.821	0.231	0.057122	0.3			0	1
Colorectal Carcinoma	C0009402	PEX5L	51555	Q8IYB4	peroxisomal biogenesis factor 5 like	Transporter	10	0.805	0.385	0.0079927	0.3			0	1
Colorectal Carcinoma	C0009402	ERGIC3	51614	Q9Y282	ERGIC and golgi 3		16	0.805	0.115	2.2416e-05	0.3			0	0
Colorectal Carcinoma	C0009402	PEG3	5178	Q9GZU2	paternally expressed 3	Transcription factor	62	0.61	0.654	2.6257e-05	0.3			0	1
Colorectal Carcinoma	C0009402	PGM1	5236	P36871	phosphoglucomutase 1		72	0.628	0.577	5.0551e-15	0.3		1	1	0	2015	2015
Colorectal Carcinoma	C0009402	ATP6V1E1	529	P36543	ATPase H+ transporting V1 subunit E1	Transporter	105	0.61	0.769	0.528	0.3			0	0
Colorectal Carcinoma	C0009402	PKNOX1	5316	P55347	PBX/knotted 1 homeobox 1	Enzyme	34	0.674	0.538	0.99401	0.3			0	1
Colorectal Carcinoma	C0009402	PMM2	5373	O15305	phosphomannomutase 2	Enzyme	214	0.535	0.769	1.4072e-17	0.3		1	1	0	2015	2015
Colorectal Carcinoma	C0009402	GPR87	53836	Q9BY21	G protein-coupled receptor 87	G-protein coupled receptor	15	0.76	0.308	4.8062e-06	0.3			0	0
Colorectal Carcinoma	C0009402	TSPEAR	54084	Q8WU66	thrombospondin type laminin G domain and EAR repeats		29	0.736	0.385	2.4371e-17	0.3			0	1
Colorectal Carcinoma	C0009402	SETD4	54093	Q9NVD3	SET domain containing 4		15	0.78	0.346	4.042e-13	0.3			0	0
Colorectal Carcinoma	C0009402	ETAA1	54465	Q9NY74	ETAA1 activator of ATR kinase		5	0.861	0.154	0.0077974	0.3			0	0
Colorectal Carcinoma	C0009402	CCDC93	54520	Q567U6	coiled-coil domain containing 93		3	0.931	0.154	6.7876e-08	0.3			0	0
Colorectal Carcinoma	C0009402	ZNHIT6	54680	Q9NWK9	zinc finger HIT-type containing 6		2	0.931	0.192	7.5337e-12	0.3			0	0
Colorectal Carcinoma	C0009402	PPOX	5498	P50336	protoporphyrinogen oxidase		53	0.678	0.5	0.02829	0.3		1	1	0	2015	2015
Colorectal Carcinoma	C0009402	PHIP	55023	Q8WWQ0	pleckstrin homology domain interacting protein	Epigenetic regulator	121	0.595	0.769	1	0.3			0	0
Colorectal Carcinoma	C0009402	ARHGEF10L	55160	Q9HCE6	Rho guanine nucleotide exchange factor 10 like	Enzyme	9	0.792	0.192	0.00047308	0.3			0	1
Colorectal Carcinoma	C0009402	PANK4	55229	Q9NVE7	pantothenate kinase 4 (inactive)	Kinase	5	0.861	0.115	0.98325	0.3			0	1
Colorectal Carcinoma	C0009402	VRTN	55237	Q9H8Y1	vertebrae development associated		3	1	0.077	0.98901	0.3			0	1
Colorectal Carcinoma	C0009402	TMEM140	55281	Q9NV12	transmembrane protein 140		3	0.931	0.115	0.053997	0.3			0	1
Colorectal Carcinoma	C0009402	SLC22A15	55356	Q8IZD6	solute carrier family 22 member 15	Transporter	5	0.931	0.115	2.516e-09	0.3		1	1	0	2011	2011
Colorectal Carcinoma	C0009402	PRG2	5553	P13727	proteoglycan 2, pro eosinophil major basic protein	Enzyme modulator	36	0.678	0.538	0.00019062	0.3			0	1
Colorectal Carcinoma	C0009402	DNAH3	55567	Q8TD57	dynein axonemal heavy chain 3	Enzyme	6	0.89	0.231	1.5364e-64	0.3			0	0
Colorectal Carcinoma	C0009402	ZDHHC7	55625	Q9NXF8	zinc finger DHHC-type palmitoyltransferase 7		6	0.861	0.192	0.00097756	0.3			0	0
Colorectal Carcinoma	C0009402	MFN1	55669	Q8IWA4	mitofusin 1	Enzyme	45	0.644	0.577	2.5118e-10	0.3			0	0
Colorectal Carcinoma	C0009402	INTS13	55726	Q9NVM9	integrator complex subunit 13		14	0.751	0.308	0.86229	0.3			0	0
Colorectal Carcinoma	C0009402	CCAR1	55749	Q8IX12	cell division cycle and apoptosis regulator 1	Calcium-binding protein	38	0.663	0.385	0.99999	0.3			0	0
Colorectal Carcinoma	C0009402	SCN3B	55800	Q9NY72	sodium voltage-gated channel beta subunit 3	Ion channel	33	0.686	0.269	0.05103	0.3			0	1
Colorectal Carcinoma	C0009402	HR	55806	O43593	HR lysine demethylase and nuclear receptor corepressor	Transcription factor	29	0.722	0.192	7.438e-10	0.3			0	0
Colorectal Carcinoma	C0009402	PROS1	5627	P07225	protein S		283	0.467	0.846	0.00047089	0.3			0	1
Colorectal Carcinoma	C0009402	KCNQ5	56479	Q9NR82	potassium voltage-gated channel subfamily Q member 5	Ion channel	35	0.686	0.5	0.98011	0.3			0	1
Colorectal Carcinoma	C0009402	PSMA2	5683	P25787	proteasome 20S subunit alpha 2		12	0.792	0.231	0.98234	0.3			0	0
Colorectal Carcinoma	C0009402	FSTL5	56884	Q8N475	follistatin like 5	Enzyme modulator	25	0.716	0.192	1.4042e-06	0.3			0	1
Colorectal Carcinoma	C0009402	PAK6	56924	Q9NQU5	p21 (RAC1) activated kinase 6		24	0.729	0.385	4.3077e-05	0.3			0	1
Colorectal Carcinoma	C0009402	MFF	56947	Q9GZY8	mitochondrial fission factor		44	0.705	0.462	0.065397	0.3			0	0
Colorectal Carcinoma	C0009402	PSMC5	5705	P62195	proteasome 26S subunit, ATPase 5	Enzyme	32	0.686	0.538	0.93308	0.3			0	0
Colorectal Carcinoma	C0009402	RNPEPL1	57140	Q9HAU8	arginyl aminopeptidase like 1		6	1	0.077	4.124e-05	0.3			0	1
Colorectal Carcinoma	C0009402	CORO1B	57175	Q9BR76	coronin 1B	Cellular structure	5	0.89	0.115	4.5885e-05	0.3			0	1
Colorectal Carcinoma	C0009402	JPH3	57338	Q8WXH2	junctophilin 3		90	0.608	0.538	0.99855	0.3		1	1	0	2007	2007
Colorectal Carcinoma	C0009402	DSCAML1	57453	Q8TD84	DS cell adhesion molecule like 1		10	0.839	0.346	1	0.3			0	2
Colorectal Carcinoma	C0009402	LRRC47	57470	Q8N1G4	leucine rich repeat containing 47	Enzyme	6	0.89	0.192	0.87056	0.3			0	0
Colorectal Carcinoma	C0009402	NLGN4X	57502	Q8N0W4	neuroligin 4 X-linked		45	0.686	0.423	0.99267	0.3			0	1
Colorectal Carcinoma	C0009402	ZNF624	57547	Q9P2J8	zinc finger protein 624		1	1	0.077	0.032471	0.3			0	0
Colorectal Carcinoma	C0009402	ZNF471	57573	Q9BX82	zinc finger protein 471		12	0.792	0.192	6.0899e-06	0.3			0	0
Colorectal Carcinoma	C0009402	RELCH	57614	Q9P260	RAB11 binding and LisH domain, coiled-coil and HEAT repeat containing		3	0.89	0.192	0.99993	0.3			0	1
Colorectal Carcinoma	C0009402	VPS18	57617	Q9P253	VPS18 core subunit of CORVET and HOPS complexes	Transporter	5	0.861	0.115	0.4761	0.3			0	0
Colorectal Carcinoma	C0009402	PTPRN2	5799	Q92932	protein tyrosine phosphatase receptor type N2		40	0.678	0.577	5.392e-07	0.3			0	1
Colorectal Carcinoma	C0009402	ABCD3	5825	P28288	ATP binding cassette subfamily D member 3	Transporter	23	0.751	0.423	0.0078364	0.3		1	1	0	2012	2012
Colorectal Carcinoma	C0009402	ABCD4	5826	O14678	ATP binding cassette subfamily D member 4	Transporter	26	0.769	0.308	1.3364e-12	0.3		1	1	0	2012	2012
Colorectal Carcinoma	C0009402	PZP	5858	P20742	PZP alpha-2-macroglobulin like	Enzyme modulator	24	0.705	0.423	6.8173e-36	0.3			0	1
Colorectal Carcinoma	C0009402	RAB5C	5878	P51148	RAB5C, member RAS oncogene family		24	0.736	0.308	0.93717	0.3			0	1
Colorectal Carcinoma	C0009402	RALGDS	5900	Q12967	ral guanine nucleotide dissociation stimulator	Enzyme modulator	33	0.722	0.462	0.88814	0.3			0	0
Colorectal Carcinoma	C0009402	HIVEP3	59269	Q5T1R4	HIVEP zinc finger 3		31	0.722	0.462	0.90584	0.3			0	1
Colorectal Carcinoma	C0009402	RBP3	5949	P10745	retinol binding protein 3		73	0.621	0.5	0.00010889	0.3			0	0
Colorectal Carcinoma	C0009402	RCN1	5954	Q15293	reticulocalbin 1	Calcium-binding protein	30	0.711	0.5	2.8821e-05	0.3			0	0
Colorectal Carcinoma	C0009402	TSKS	60385	Q9UJT2	testis specific serine kinase substrate		6	0.89	0.077	0.99652	0.3			0	1
Colorectal Carcinoma	C0009402	EXOC4	60412	Q96A65	exocyst complex component 4	Transporter	20	0.743	0.5	3.4137e-13	0.3			0	1
Colorectal Carcinoma	C0009402	ABCE1	6059	P61221	ATP binding cassette subfamily E member 1		41	0.674	0.462	0.9738	0.3		1	1	0	2012	2012
Colorectal Carcinoma	C0009402	RPL6	6128	Q02878	ribosomal protein L6	Nucleic acid binding	27	0.7	0.385	0.99326	0.3			0	0
Colorectal Carcinoma	C0009402	SCNN1B	6338	P51168	sodium channel epithelial 1 subunit beta	Ion channel	86	0.628	0.577	5.7545e-08	0.3			0	1
Colorectal Carcinoma	C0009402	SCNN1G	6340	P51170	sodium channel epithelial 1 subunit gamma	Ion channel	76	0.633	0.577	0.48199	0.3			0	1
Colorectal Carcinoma	C0009402	DUSP21	63904	Q9H596	dual specificity phosphatase 21		2	0.931	0.077	0.0003235	0.3			0	1
Colorectal Carcinoma	C0009402	DMRTA1	63951	Q5VZB9	DMRT like family A1		17	0.729	0.5	6.3708e-06	0.3			0	1
Colorectal Carcinoma	C0009402	CLSTN2	64084	Q9H4D0	calsyntenin 2	Calcium-binding protein	25	0.716	0.423	3.5246e-06	0.3			0	1
Colorectal Carcinoma	C0009402	LRRC4	64101	Q9HBW1	leucine rich repeat containing 4		57	0.617	0.577	0.99787	0.3			0	0
Colorectal Carcinoma	C0009402	NCAPG	64151	Q9BPX3	non-SMC condensin I complex subunit G		19	0.743	0.269	4.0848e-07	0.3			0	0
Colorectal Carcinoma	C0009402	MS4A5	64232	Q9H3V2	membrane spanning 4-domains A5	Receptor	3	0.931	0.115	0.00037917	0.3			0	0
Colorectal Carcinoma	C0009402	CHST8	64377	Q9H2A9	carbohydrate sulfotransferase 8	Enzyme	13	0.769	0.346	0.00010793	0.3			0	1
Colorectal Carcinoma	C0009402	GMCL2	64396	Q8NEA9	germ cell-less 2, spermatogenesis associated		15	0.751	0.308		0.3			0	0
Colorectal Carcinoma	C0009402	CDH22	64405	Q9UJ99	cadherin 22		16	0.821	0.192	0.4999	0.3		1	1	0	2015	2015
Colorectal Carcinoma	C0009402	ARAP3	64411	Q8WWN8	ArfGAP with RhoGAP domain, ankyrin repeat and PH domain 3		20	0.751	0.346	1.647e-05	0.3			0	0
Colorectal Carcinoma	C0009402	PLPPR2	64748	Q96GM1	phospholipid phosphatase related 2	Enzyme	1	1	0.077	0.99025	0.3			0	0
Colorectal Carcinoma	C0009402	BCL11B	64919	Q9C0K0	BAF chromatin remodeling complex subunit BCL11B	Transcription factor	123	0.568	0.731	0.98881	0.3			0	0
Colorectal Carcinoma	C0009402	SLC26A10	65012	Q8NG04	solute carrier family 26 member 10	Transporter	1	1	0.077	2.0972e-15	0.3			0	0
Colorectal Carcinoma	C0009402	SLC1A7	6512	O00341	solute carrier family 1 member 7	Transporter	17	0.769	0.346	7.5281e-11	0.3			0	1
Colorectal Carcinoma	C0009402	SMTN	6525	P53814	smoothelin		17	0.736	0.346	1.5966e-07	0.3			0	1
Colorectal Carcinoma	C0009402	SLCO1A2	6579	P46721	solute carrier organic anion transporter family member 1A2	Transporter	44	0.656	0.577	1.0581e-16	0.3			0	0
Colorectal Carcinoma	C0009402	BOLL	66037	Q8N9W6	boule homolog, RNA binding protein	Nucleic acid binding	15	0.792	0.346	0.058307	0.3		1	1	0	2007	2007
Colorectal Carcinoma	C0009402	SNRPB2	6629	P08579	small nuclear ribonucleoprotein polypeptide B2	Nucleic acid binding	2	0.931	0.115	0.050625	0.3			0	0
Colorectal Carcinoma	C0009402	SORL1	6653	Q92673	sortilin related receptor 1	Transporter	103	0.582	0.692	7.6609e-11	0.3			0	1
Colorectal Carcinoma	C0009402	SPTBN2	6712	O15020	spectrin beta, non-erythrocytic 2		79	0.619	0.731	9.9268e-05	0.3			0	0
Colorectal Carcinoma	C0009402	ZFP36L2	678	P47974	ZFP36 ring finger protein like 2	Nucleic acid binding	34	0.686	0.5	0.966	0.3		1	1	0	2015	2015
Colorectal Carcinoma	C0009402	CDKL5	6792	O76039	cyclin dependent kinase like 5	Kinase	224	0.522	0.692	0.99932	0.3			0	0
Colorectal Carcinoma	C0009402	SULT2B1	6820	O00204	sulfotransferase family 2B member 1		59	0.641	0.538	0.43553	0.3		1	1	0	2018	2018
Colorectal Carcinoma	C0009402	ABCC8	6833	Q09428	ATP binding cassette subfamily C member 8	Transporter	317	0.474	0.846	7.9571e-24	0.3		1	1	0	2012	2012
Colorectal Carcinoma	C0009402	TCOF1	6949	Q13428	treacle ribosome biogenesis factor 1		138	0.55	0.808	0.9541	0.3			0	1
Colorectal Carcinoma	C0009402	ICAM5	7087	Q9UMF0	intercellular adhesion molecule 5		29	0.716	0.346	0.002139	0.3		1	2	0	2008	2011
Colorectal Carcinoma	C0009402	TUBB2A	7280	Q13885	tubulin beta 2A class IIa	Cellular structure	37	0.678	0.538	0.93478	0.3			0	1
Colorectal Carcinoma	C0009402	ZBTB8B	728116	Q8NAP8	zinc finger and BTB domain containing 8B		1	1	0.077	0.0012501	0.3			0	0
Colorectal Carcinoma	C0009402	WNT8B	7479	Q93098	Wnt family member 8B	Signaling	8	0.839	0.154	0.010991	0.3			0	0
Colorectal Carcinoma	C0009402	ZNF43	7594	P17038	zinc finger protein 43		1	1	0.077	0.00050468	0.3			0	1
Colorectal Carcinoma	C0009402	MKRN3	7681	Q13064	makorin ring finger protein 3	Enzyme	92	0.619	0.615	0.27756	0.3			0	1
Colorectal Carcinoma	C0009402	ZNF155	7711	Q12901	zinc finger protein 155		1	1	0.077	6.6195e-07	0.3			0	1
Colorectal Carcinoma	C0009402	ZNF232	7775	Q9UNY5	zinc finger protein 232		2	0.931	0.154	3.3651e-05	0.3			0	0
Colorectal Carcinoma	C0009402	DNALI1	7802	O14645	dynein axonemal light intermediate chain 1	Cellular structure	37	0.674	0.615	4.1201e-11	0.3			0	1
Colorectal Carcinoma	C0009402	CACNB1	782	Q02641	calcium voltage-gated channel auxiliary subunit beta 1	Ion channel	9	0.792	0.154	0.78689	0.3			0	1
Colorectal Carcinoma	C0009402	CACNB2	783	Q08289	calcium voltage-gated channel auxiliary subunit beta 2	Ion channel	56	0.659	0.538	2.6719e-06	0.3			0	1
Colorectal Carcinoma	C0009402	PAX8	7849	Q06710	paired box 8		253	0.477	0.731	0.99869	0.3		1	1	0	2015	2015
Colorectal Carcinoma	C0009402	CYREN	78996	Q9BWK5	cell cycle regulator of NHEJ		14	0.821	0.269	0.25971	0.3			0	2
Colorectal Carcinoma	C0009402	GDAP1L1	78997	Q96MZ0	ganglioside induced differentiation associated protein 1 like 1		2	0.931	0.154	0.4453	0.3			0	1
Colorectal Carcinoma	C0009402	ZSCAN5A	79149	Q9BUG6	zinc finger and SCAN domain containing 5A		1	1	0.077	0.0081938	0.3			0	1
Colorectal Carcinoma	C0009402	RIC3	79608	Q7Z5B4	RIC3 acetylcholine receptor chaperone		6	0.839	0.231	2.1447e-06	0.3			0	0
Colorectal Carcinoma	C0009402	PARP8	79668	Q8N3A8	poly(ADP-ribose) polymerase family member 8		2	0.931	0.115	0.059603	0.3			0	0
Colorectal Carcinoma	C0009402	ZNF385D	79750	Q9H6B1	zinc finger protein 385D		23	0.76	0.269	0.65437	0.3			0	1
Colorectal Carcinoma	C0009402	MMRN2	79812	Q9H8L6	multimerin 2		11	0.861	0.115	4.8869e-11	0.3			0	1
Colorectal Carcinoma	C0009402	ZNF442	79973	Q9H7R0	zinc finger protein 442		1	1	0.077	0.03048	0.3			0	2
Colorectal Carcinoma	C0009402	CSRNP3	80034	Q8WYN3	cysteine and serine rich nuclear protein 3		20	0.805	0.192	0.50018	0.3			0	1
Colorectal Carcinoma	C0009402	CEBPA-DT	80054		CEBPA divergent transcript		12	0.821	0.115		0.3		1	1	0	2015	2015
Colorectal Carcinoma	C0009402	SLC66A2	80148	Q8N2U9	solute carrier family 66 member 2		1	1	0.077	0.010336	0.3			0	0
Colorectal Carcinoma	C0009402	PREX2	80243	Q70Z35	phosphatidylinositol-3,4,5-trisphosphate dependent Rac exchange factor 2	Enzyme modulator	19	0.743	0.385	3.3283e-16	0.3			0	1
Colorectal Carcinoma	C0009402	STAM	8027	Q92783	signal transducing adaptor molecule		20	0.736	0.269	0.85048	0.3			0	0
Colorectal Carcinoma	C0009402	BPIFB2	80341	Q8N4F0	BPI fold containing family B member 2		4	0.861	0.385	4.7491e-12	0.3			0	0
Colorectal Carcinoma	C0009402	TRAF3IP3	80342	Q9Y228	TRAF3 interacting protein 3	Chaperone	13	0.839	0.192	2.1912e-12	0.3			0	0
Colorectal Carcinoma	C0009402	ZSCAN16	80345	Q9H4T2	zinc finger and SCAN domain containing 16		1	1	0.077	2.1302e-07	0.3			0	1
Colorectal Carcinoma	C0009402	PBX4	80714	Q9BYU1	PBX homeobox 4	Transcription factor	12	0.839	0.231	5.2605e-05	0.3			0	1
Colorectal Carcinoma	C0009402	SLC44A4	80736	Q53GD3	solute carrier family 44 member 4	Transporter	39	0.678	0.615	1.0036e-14	0.3			0	1
Colorectal Carcinoma	C0009402	MLF2	8079	Q15773	myeloid leukemia factor 2	Signaling	12	0.792	0.231	0.86042	0.3			0	0
Colorectal Carcinoma	C0009402	LAS1L	81887	Q9Y4W2	LAS1 like ribosome biogenesis factor		54	0.682	0.654	0.99955	0.3			0	1
Colorectal Carcinoma	C0009402	RBM10	8241	P98175	RNA binding motif protein 10		99	0.599	0.615	1	0.3			0	0
Colorectal Carcinoma	C0009402	CAPN6	827	Q9Y6Q1	calpain 6	Enzyme	11	0.839	0.077	0.81903	0.3			0	0
Colorectal Carcinoma	C0009402	GFI1B	8328	Q5VTD9	growth factor independent 1B transcriptional repressor		76	0.623	0.5	0.00052334	0.3			0	1
Colorectal Carcinoma	C0009402	H2BC14	8342	Q99879	H2B clustered histone 14	Nucleic acid binding	2	0.931	0.077	5.0487e-06	0.3			0	0
Colorectal Carcinoma	C0009402	OR1E2	8388	P47887	olfactory receptor family 1 subfamily E member 2	G-protein coupled receptor	1	1	0.077	0.0015619	0.3			0	0
Colorectal Carcinoma	C0009402	FBXO30	84085	Q8TB52	F-box protein 30		1	1	0.077	0.35835	0.3			0	0
Colorectal Carcinoma	C0009402	TOMM40L	84134	Q969M1	translocase of outer mitochondrial membrane 40 like	Transporter	1	1	0.077	0.66713	0.3			0	0
Colorectal Carcinoma	C0009402	TMEM164	84187	Q5U3C3	transmembrane protein 164		9	0.792	0.154	0.94373	0.3			0	0
Colorectal Carcinoma	C0009402	HPS3	84343	Q969F9	HPS3 biogenesis of lysosomal organelles complex 2 subunit 1		16	0.769	0.308	2.9433e-21	0.3			0	1
Colorectal Carcinoma	C0009402	LZTS2	84445	Q9BRK4	leucine zipper tumor suppressor 2		22	0.743	0.346	0.046089	0.3			0	1
Colorectal Carcinoma	C0009402	CCDC62	84660	Q6P9F0	coiled-coil domain containing 62		15	0.805	0.308	4.3887e-16	0.3			0	0
Colorectal Carcinoma	C0009402	PIGO	84720	Q8TEQ8	phosphatidylinositol glycan anchor biosynthesis class O		87	0.636	0.615	6.1434e-11	0.3			0	0
Colorectal Carcinoma	C0009402	LMNB2	84823	Q03252	lamin B2		74	0.636	0.615	0.99996	0.3			0	1
Colorectal Carcinoma	C0009402	IGSF21	84966	Q96ID5	immunoglobin superfamily member 21		14	0.792	0.308	0.20912	0.3			0	1
Colorectal Carcinoma	C0009402	HAT1	8520	O14929	histone acetyltransferase 1	Enzyme	42	0.656	0.5	0.83507	0.3			0	0
Colorectal Carcinoma	C0009402	CCNB3	85417	Q8WWL7	cyclin B3	Enzyme modulator	28	0.705	0.154	0.8585	0.3			0	0
Colorectal Carcinoma	C0009402	CBFA2T3	863	O75081	CBFA2/RUNX1 partner transcriptional co-repressor 3	Transcription factor	53	0.638	0.462	0.048373	0.3			0	3
Colorectal Carcinoma	C0009402	DCHS1	8642	Q96JQ0	dachsous cadherin-related 1		100	0.592	0.731	0.99997	0.3			0	1
Colorectal Carcinoma	C0009402	ABCB11	8647	O95342	ATP binding cassette subfamily B member 11	Transporter	126	0.566	0.654	1.5612e-12	0.3		1	1	0	2012	2012
Colorectal Carcinoma	C0009402	MCM3AP	8888	O60318	minichromosome maintenance complex component 3 associated protein		58	0.647	0.654	5.24e-09	0.3			0	1
Colorectal Carcinoma	C0009402	KALRN	8997	O60229	kalirin RhoGEF kinase	Kinase	59	0.644	0.654	1	0.3			0	1
Colorectal Carcinoma	C0009402	FAM110B	90362	Q8TC76	family with sequence similarity 110 member B		8	0.861	0.115	0.36414	0.3			0	1
Colorectal Carcinoma	C0009402	ARHGEF1	9138	Q92888	Rho guanine nucleotide exchange factor 1		53	0.623	0.538	0.76754	0.3			0	0
Colorectal Carcinoma	C0009402	ZNF804A	91752	Q7Z570	zinc finger protein 804A		53	0.647	0.654	0.0055255	0.3			0	0
Colorectal Carcinoma	C0009402	MYLK3	91807	Q32MK0	myosin light chain kinase 3	Kinase	27	0.7	0.385	5.8848e-07	0.3			0	1
Colorectal Carcinoma	C0009402	SLC33A1	9197	O00400	solute carrier family 33 member 1	Transporter	170	0.529	0.769	9.8902e-05	0.3			0	0
Colorectal Carcinoma	C0009402	ZMYM4	9202	Q5VZL5	zinc finger MYM-type containing 4	Enzyme modulator	5	0.931	0.077	1	0.3			0	1
Colorectal Carcinoma	C0009402	DSEL	92126	Q8IZU8	dermatan sulfate epimerase like		7	0.839	0.346	7.2945e-06	0.3			0	0
Colorectal Carcinoma	C0009402	KCNB2	9312	Q92953	potassium voltage-gated channel subfamily B member 2	Ion channel	8	0.89	0.154	0.99613	0.3			0	1
Colorectal Carcinoma	C0009402	OLFM2	93145	O95897	olfactomedin 2	Cellular structure	14	0.78	0.231	0.080225	0.3			0	1
Colorectal Carcinoma	C0009402	NDST3	9348	O95803	N-deacetylase and N-sulfotransferase 3		10	0.805	0.192	1.0699e-05	0.3			0	0
Colorectal Carcinoma	C0009402	SFXN1	94081	Q9H9B4	sideroflexin 1	Transporter	73	0.597	0.731	0.00097212	0.3		1	1	0	2015	2015
Colorectal Carcinoma	C0009402	AKAP6	9472	Q13023	A-kinase anchoring protein 6		34	0.695	0.538	0.99983	0.3			0	1
Colorectal Carcinoma	C0009402	MYOT	9499	Q9UBF9	myotilin		82	0.695	0.385	3.3663e-08	0.3			0	0
Colorectal Carcinoma	C0009402	ABCG1	9619	P45844	ATP binding cassette subfamily G member 1	Transporter	118	0.56	0.692	0.11182	0.3		1	1	0	2012	2012
Colorectal Carcinoma	C0009402	PPM1F	9647	P49593	protein phosphatase, Mg2+/Mn2+ dependent 1F	Enzyme	20	0.78	0.269	0.0038754	0.3			0	1
Colorectal Carcinoma	C0009402	ZNF432	9668	O94892	zinc finger protein 432		9	0.805	0.192	3.0049e-14	0.3		1	1	0	2008	2008
Colorectal Carcinoma	C0009402	ACAP1	9744	Q15027	ArfGAP with coiled-coil, ankyrin repeat and PH domains 1		7	0.839	0.269	0.067617	0.3			0	1
Colorectal Carcinoma	C0009402	CLSTN3	9746	Q9BQT9	calsyntenin 3	Calcium-binding protein	8	0.792	0.423	0.97016	0.3			0	0
Colorectal Carcinoma	C0009402	STARD8	9754	Q92502	StAR related lipid transfer domain containing 8		23	0.743	0.346	0.024522	0.3		1	2	0	2008	2011
Colorectal Carcinoma	C0009402	JAKMIP2	9832	Q96AA8	janus kinase and microtubule interacting protein 2		7	0.805	0.308	1	0.3			0	1
Colorectal Carcinoma	C0009402	PAN2	9924	Q504Q3	poly(A) specific ribonuclease subunit PAN2	Enzyme	17	0.76	0.231	0.93596	0.3			0	1
Colorectal Carcinoma	C0009402	P2RY14	9934	Q15391	purinergic receptor P2Y14	G-protein coupled receptor	13	0.78	0.154	0.00054873	0.3			0	0
Colorectal Carcinoma	C0009402	AGER	177	Q15109	advanced glycosylation end-product specific receptor	Receptor	450	0.42	0.885	6.3528e-16	0.27		0.875	8	3	2003	2019
Colorectal Carcinoma	C0009402	NFE2L2	4780	Q16236	nuclear factor, erythroid 2 like 2	Enzyme	823	0.357	0.885	0.0035719	0.2		0.889	27	3	2012	2020
Colorectal Carcinoma	C0009402	BAX	581	Q07812	BCL2 associated X, apoptosis regulator	Signaling	420	0.417	0.885	0.31746	0.2		0.969	32	1	1998	2019
Colorectal Carcinoma	C0009402	BRCA2	675	P51587	BRCA2 DNA repair associated	Nucleic acid binding	656	0.379	0.846	2.3581e-25	0.2		1	21	5	1998	2019
Colorectal Carcinoma	C0009402	CD59	966	P13987	CD59 molecule (CD59 blood group)		262	0.469	0.808	0.60568	0.2		1	1	0	2003	2003
Colorectal Carcinoma	C0009402	CCAT2	101805488		colon cancer associated transcript 2		56	0.621	0.615		0.17		1	22	4	2007	2019
Colorectal Carcinoma	C0009402	CDH3	1001	P22223	cadherin 3		119	0.56	0.615	2.7988e-10	0.16		1	7	1	2008	2019
Colorectal Carcinoma	C0009402	FGFR2	2263	P21802	fibroblast growth factor receptor 2	Kinase	731	0.38	0.808	0.99731	0.16		1	7	1	2001	2019
Colorectal Carcinoma	C0009402	SLC22A3	6581	O75751	solute carrier family 22 member 3	Transporter	154	0.531	0.846	7.7723e-10	0.16		1	7	1	2011	2020
Colorectal Carcinoma	C0009402	BCL10	8915	O95999	BCL10 immune signaling adaptor		205	0.491	0.769	0.33709	0.16		0.833	6	1	1999	2015
Colorectal Carcinoma	C0009402	STS	412	P08842	steroid sulfatase	Enzyme	382	0.431	0.846	0.80886	0.15		1	6	1	2003	2017
Colorectal Carcinoma	C0009402	PLA2G2A	5320	P14555	phospholipase A2 group IIA	Enzyme	215	0.488	0.808	0.097278	0.15		1	5	1	1997	2013
Colorectal Carcinoma	C0009402	PTPRJ	5795	Q12913	protein tyrosine phosphatase receptor type J	Enzyme	79	0.606	0.615	1.2879e-11	0.15		0.8	5	3	2003	2019
Colorectal Carcinoma	C0009402	PCAT1	100750225		prostate cancer associated transcript 1		90	0.575	0.615		0.14		1	23	13	2007	2019
Colorectal Carcinoma	C0009402	COLCA2	120376	A8K830	colorectal cancer associated 2		12	0.769	0.154	0.75066	0.14		1	14	3	2008	2019
Colorectal Carcinoma	C0009402	LRIG1	26018	Q96JA1	leucine rich repeats and immunoglobulin like domains 1	Receptor	83	0.601	0.538	0.035031	0.14		0.833	6	1	2007	2019
Colorectal Carcinoma	C0009402	HLA-B	3106	P01889	major histocompatibility complex, class I, B		706	0.379	0.885	3.8642e-05	0.14		1	5	1	1989	2016
Colorectal Carcinoma	C0009402	LAMA5	3911	O15230	laminin subunit alpha 5	Enzyme modulator	56	0.636	0.577	0.0064742	0.14		0.857	7	2	2010	2019
Colorectal Carcinoma	C0009402	NOS1	4842	P29475	nitric oxide synthase 1		521	0.408	0.885	1	0.14		1	6	1	2005	2019
Colorectal Carcinoma	C0009402	CASC8	727677		cancer susceptibility 8		35	0.67	0.462		0.14		1	23	11	2007	2019
Colorectal Carcinoma	C0009402	SH2B3	10019	Q9UQQ2	SH2B adaptor protein 3		212	0.527	0.692	0.00010289	0.13		1	7	1	2015	2020
Colorectal Carcinoma	C0009402	CYP17A1	1586	P05093	cytochrome P450 family 17 subfamily A member 1		326	0.462	0.769	0.00026255	0.13		1	4	1	2007	2016
Colorectal Carcinoma	C0009402	MPRIP	23164	Q6WCQ1	myosin phosphatase Rho interacting protein	Enzyme modulator	113	0.556	0.885	0.98078	0.13		1	3	2	2017	2019
Colorectal Carcinoma	C0009402	KRT8	3856	P05787	keratin 8		166	0.517	0.654	2.36e-08	0.13		1	4	1	2016	2018
Colorectal Carcinoma	C0009402	COLCA1	399948	Q6ZS62	colorectal cancer associated 1		12	0.78	0.154		0.13		1	13	3	2008	2019
Colorectal Carcinoma	C0009402	ATF1	466	P18846	activating transcription factor 1		88	0.588	0.577	0.63426	0.13		1	4	5	2015	2019
Colorectal Carcinoma	C0009402	WWOX	51741	Q9NZC7	WW domain containing oxidoreductase	Enzyme	356	0.453	0.808	1.2376e-15	0.13		1	4	1	2011	2019
Colorectal Carcinoma	C0009402	CDKN2B-AS1	100048912		CDKN2B antisense RNA 1		213	0.491	0.769		0.12		1	5	3	2016	2019
Colorectal Carcinoma	C0009402	EDN1	1906	P05305	endothelin 1	Signaling	679	0.38	0.846	0.45504	0.12		1	3	1	2014	2019
Colorectal Carcinoma	C0009402	GATA3	2625	P23771	GATA binding protein 3		429	0.415	0.846	0.89887	0.12		1	3	1	2014	2019
Colorectal Carcinoma	C0009402	NOTCH4	4855	Q99466	notch receptor 4		150	0.534	0.731	2.0544e-23	0.12		1	3	1	2018	2019
Colorectal Carcinoma	C0009402	TMBIM1	64114	Q969X1	transmembrane BAX inhibitor motif containing 1		30	0.711	0.154	1.3647e-08	0.12		1	4	1	2016	2019
Colorectal Carcinoma	C0009402	BMP5	653	P22003	bone morphogenetic protein 5	Signaling	43	0.653	0.577	0.00090084	0.12		1	4	1	2018	2019
Colorectal Carcinoma	C0009402	MZF1	7593	P28698	myeloid zinc finger 1		62	0.617	0.577	1.0667e-10	0.12		1	3	1	2015	2019
Colorectal Carcinoma	C0009402	UTP23	84294	Q9BRU9	UTP23 small subunit processome component		29	0.711	0.385	0.086364	0.12		1	4	3	2012	2019
Colorectal Carcinoma	C0009402	EPHA5	2044	P54756	EPH receptor A5	Kinase	61	0.626	0.615	7.2877e-05	0.11		0.5	2	1	2017	2018
Colorectal Carcinoma	C0009402	ETV6	2120	P41212	ETS variant transcription factor 6	Transcription factor	241	0.477	0.731	0.9735	0.11		1	1	1	2016	2016
Colorectal Carcinoma	C0009402	FKBP5	2289	Q13451	FKBP prolyl isomerase 5	Enzyme	179	0.524	0.769	0.73393	0.11		1	3	1	2017	2019
Colorectal Carcinoma	C0009402	RALY	22913	Q9UKM9	RALY heterogeneous nuclear ribonucleoprotein		46	0.656	0.385	0.13796	0.11		1	2	1	2011	2016
Colorectal Carcinoma	C0009402	RAD54B	25788	O95073;Q9Y620	RAD54 homolog B		38	0.659	0.462	8.1173e-13	0.11		1	1	1	2009	2009
Colorectal Carcinoma	C0009402	CHRDL2	25884	Q6WN34	chordin like 2		21	0.729	0.308	1.595e-06	0.11		1	3	2	2017	2019
Colorectal Carcinoma	C0009402	HSPA12A	259217	O43301	heat shock protein family A (Hsp70) member 12A		41	0.67	0.346	0.98436	0.11		1	2	1	2013	2015
Colorectal Carcinoma	C0009402	HLA-F	3134	P30511	major histocompatibility complex, class I, F		51	0.631	0.654	3.276e-05	0.11		1	2	1	2017	2019
Colorectal Carcinoma	C0009402	C11orf53	341032	Q8IXP5	chromosome 11 open reading frame 53		10	0.792	0.077	0.0019229	0.11		1	4	3	2008	2019
Colorectal Carcinoma	C0009402	FMN1	342184	Q68DA7	formin 1		29	0.686	0.423	3.5863e-18	0.11		1	3	2	2008	2019
Colorectal Carcinoma	C0009402	SHROOM2	357	Q13796	shroom family member 2		21	0.729	0.385	0.0029403	0.11		1	2	1	2012	2019
Colorectal Carcinoma	C0009402	RTEL1	51750	Q9NZ71	regulator of telomere elongation helicase 1	Enzyme	321	0.459	0.808	8.8674e-10	0.11		1	3	2	2015	2019
Colorectal Carcinoma	C0009402	ERAP1	51752	Q9NZ08	endoplasmic reticulum aminopeptidase 1	Enzyme	156	0.556	0.692	2.0562e-26	0.11		1	2	1	2013	2015
Colorectal Carcinoma	C0009402	ELOVL5	60481	Q9NYP7	ELOVL fatty acid elongase 5	Enzyme	57	0.638	0.462	0.93341	0.11		1	1	1	2016	2016
Colorectal Carcinoma	C0009402	TNS3	64759	Q68CZ2	tensin 3		50	0.653	0.615	1	0.11		1	2	1	2005	2019
Colorectal Carcinoma	C0009402	HNF1B	6928	P35680	HNF1 homeobox B	Nucleic acid binding	279	0.473	0.808	0.99976	0.11		1	2	1	2016	2016
Colorectal Carcinoma	C0009402	TNS1	7145	Q9HBL0	tensin 1		38	0.691	0.538	0.059861	0.11		1	2	1	2011	2018
Colorectal Carcinoma	C0009402	TFEB	7942	P19484	transcription factor EB		150	0.527	0.731	0.89931	0.11		1	3	2	2016	2019
Colorectal Carcinoma	C0009402	SBF2	81846	Q86WG5	SET binding factor 2	Enzyme	77	0.619	0.577	6.3771e-10	0.11		1	2	1	2015	2019
Colorectal Carcinoma	C0009402	SYMPK	8189	Q92797	symplekin		39	0.7	0.231	1	0.11		1	2	1	2010	2017
Colorectal Carcinoma	C0009402	BRIP1	83990	Q9BX63	BRCA1 interacting protein C-terminal helicase 1	Enzyme	194	0.507	0.731	6.206e-17	0.11		1	2	1	2012	2016
Colorectal Carcinoma	C0009402	NAT2	10	P11245	N-acetyltransferase 2	Enzyme	311	0.451	0.885	3.2744e-06	0.1		0.957	46	3	1993	2015
Colorectal Carcinoma	C0009402	HOTAIR	100124700		HOX transcript antisense RNA		234	0.475	0.769		0.1		0.938	16	1	2011	2019
Colorectal Carcinoma	C0009402	MZF1-AS1	100131691		MZF1 antisense RNA 1		10	0.792	0.077		0.1		1	1	1	2019	2019
Colorectal Carcinoma	C0009402	CD24	100133941	P25063	CD24 molecule		244	0.472	0.769		0.1		1	10	0	2006	2019
Colorectal Carcinoma	C0009402	TMED7-TICAM2	100302736	Q86XR7;Q9Y3B3	TMED7-TICAM2 readthrough		329	0.438	0.769	0.0025936	0.1		0.952	21	0	1997	2019
Colorectal Carcinoma	C0009402	BAALC-AS1	100499183		BAALC antisense RNA 1		15	0.76	0.115		0.1		1	1	1	2018	2018
Colorectal Carcinoma	C0009402	COMMD3-BMI1	100532731	P35226	COMMD3-BMI1 readthrough		202	0.488	0.769	0.0014998	0.1		1	11	0	2010	2019
Colorectal Carcinoma	C0009402	RTEL1-TNFRSF6B	100533107		RTEL1-TNFRSF6B readthrough (NMD candidate)		32	0.682	0.385		0.1		1	2	2	2019	2019
Colorectal Carcinoma	C0009402	FSBP	100861412	O95073;Q9Y620	fibrinogen silencer binding protein		8	0.821	0.231	0.00070681	0.1			0	1
Colorectal Carcinoma	C0009402	LINC00446	100874175		long intergenic non-protein coding RNA 446		10	0.805	0.077		0.1		1	1	1	2019	2019
Colorectal Carcinoma	C0009402	OBI1-AS1	100874222		OBI1 antisense RNA 1		14	0.792	0.115		0.1		1	1	1	2019	2019
Colorectal Carcinoma	C0009402	C5orf66	100996485	Q9H5L9	chromosome 5 open reading frame 66		18	0.76	0.154	0.00052699	0.1		1	7	6	2013	2019
Colorectal Carcinoma	C0009402	TMEM220-AS1	101101775		TMEM220 antisense RNA 1		10	0.792	0.077		0.1		1	3	1	2019	2019
Colorectal Carcinoma	C0009402	ACTR1B	10120	P42025	actin related protein 1B	Cellular structure	23	0.729	0.231	0.0010746	0.1		1	1	1	2019	2019
Colorectal Carcinoma	C0009402	FRY	10129	Q5TBA9	FRY microtubule binding protein		42	0.666	0.5	1	0.1		1	1	2	2016	2016
Colorectal Carcinoma	C0009402	TRAP1	10131	Q12931	TNF receptor associated protein 1	Chaperone	90	0.59	0.615	1.5965e-29	0.1		1	10	0	2009	2018
Colorectal Carcinoma	C0009402	CLEC3A	10143	O75596	C-type lectin domain family 3 member A	Extracellular structure	20	0.769	0.154	1.9968e-11	0.1		1	1	1	2015	2015
Colorectal Carcinoma	C0009402	CDK4	1019	P11802	cyclin dependent kinase 4	Kinase	433	0.412	0.808	0.062909	0.1		1	16	0	2003	2018
Colorectal Carcinoma	C0009402	CRTC3-AS1	101926895		CRTC3 antisense RNA 1		13	0.792	0.077		0.1		1	1	1	2019	2019
Colorectal Carcinoma	C0009402	EP300-AS1	101927279		EP300 antisense RNA 1		8	0.839	0.231		0.1			0	1
Colorectal Carcinoma	C0009402	LINC01475	101927324		long intergenic non-protein coding RNA 1475		14	0.78	0.077		0.1		1	3	2	2014	2019
Colorectal Carcinoma	C0009402	LINC01917	101928167		long intergenic non-protein coding RNA 1917		5	0.931	0.115		0.1			0	1
Colorectal Carcinoma	C0009402	LINC01708	101928270		long intergenic non-protein coding RNA 1708		4	0.861	0.192		0.1		1	1	1	2012	2012
Colorectal Carcinoma	C0009402	CDK8	1024	P49336	cyclin dependent kinase 8	Kinase	82	0.597	0.654	0.40964	0.1		1	10	0	2008	2018
Colorectal Carcinoma	C0009402	CDKN1A	1026	P38936	cyclin dependent kinase inhibitor 1A		490	0.403	0.769	0.0018575	0.1		1	35	1	1995	2018
Colorectal Carcinoma	C0009402	CDKN1B	1027	P46527	cyclin dependent kinase inhibitor 1B		454	0.409	0.769	0.62376	0.1		1	14	0	1997	2018
Colorectal Carcinoma	C0009402	LINC01500	102723742		long intergenic non-protein coding RNA 1500		15	0.76	0.192		0.1		1	3	6	2013	2019
Colorectal Carcinoma	C0009402	CDKN2A	1029	P42771;Q8N726	cyclin dependent kinase inhibitor 2A		1314	0.3	0.885	0.39474	0.1		0.913	103	2	1996	2019
Colorectal Carcinoma	C0009402	CCND2-AS1	103752584		CCND2 antisense RNA 1		19	0.76	0.154		0.1		1	7	5	2013	2019
Colorectal Carcinoma	C0009402	NDRG1	10397	Q92597	N-myc downstream regulated 1	Enzyme	225	0.488	0.731	0.011324	0.1		1	12	0	2004	2019
Colorectal Carcinoma	C0009402	CDX1	1044	P47902	caudal type homeobox 1	Transcription factor	54	0.644	0.346	0.14253	0.1		1	14	0	1998	2017
Colorectal Carcinoma	C0009402	CDX2	1045	Q99626	caudal type homeobox 2	Transcription factor	278	0.458	0.769	0.52887	0.1		0.897	78	0	1998	2020
Colorectal Carcinoma	C0009402	CEACAM5	1048	P06731	CEA cell adhesion molecule 5		428	0.42	0.846	4.1625e-10	0.1		0.99	288	0	1986	2020
Colorectal Carcinoma	C0009402	CIB1	10519	Q99828	calcium and integrin binding 1		275	0.458	0.769	0.00032612	0.1		1	10	0	2001	2014
Colorectal Carcinoma	C0009402	ZNRD2	10534	O60232	zinc ribbon domain containing 2		311	0.443	0.769	1.8426e-07	0.1		0.95	20	0	1997	2019
Colorectal Carcinoma	C0009402	LINC02264	105377391		long intergenic non-protein coding RNA 2264		2	0.931	0.115		0.1		1	1	1	2014	2014
Colorectal Carcinoma	C0009402	LRP1-AS	105751187		LRP1 antisense RNA		18	0.722	0.5		0.1		1	1	1	2019	2019
Colorectal Carcinoma	C0009402	AHSA1	10598	O95433	activator of HSP90 ATPase activity 1		526	0.396	0.923	0.99896	0.1		1	13	0	2000	2020
Colorectal Carcinoma	C0009402	LINC01173	106144537		long intergenic non-protein coding RNA 1173		9	0.805	0.077		0.1		1	1	1	2017	2017
Colorectal Carcinoma	C0009402	DCTN6	10671	O00399	dynactin subunit 6	Cellular structure	315	0.442	0.769	0.055741	0.1		0.95	20	0	1997	2019
Colorectal Carcinoma	C0009402	MTCO2P12	107075310		MT-CO2 pseudogene 12		703	0.368	0.962		0.1		0.982	109	0	1994	2020
Colorectal Carcinoma	C0009402	SEPTIN9	10801	Q9UHD8	septin 9	Enzyme modulator	150	0.548	0.769	0.99579	0.1		0.979	48	0	2008	2020
Colorectal Carcinoma	C0009402	HSPH1	10808	Q92598	heat shock protein family H (Hsp110) member 1		48	0.65	0.538	0.99822	0.1		1	13	0	2009	2020
Colorectal Carcinoma	C0009402	CEACAM3	1084	P40198	CEA cell adhesion molecule 3		204	0.494	0.731	1.067e-09	0.1		0.989	90	0	1986	2020
Colorectal Carcinoma	C0009402	LILRB1	10859	Q8NHL6	leukocyte immunoglobulin like receptor B1	Receptor	168	0.51	0.769	5.6502e-14	0.1		1	11	0	2013	2019
Colorectal Carcinoma	C0009402	CEACAM7	1087	Q14002	CEA cell adhesion molecule 7		202	0.494	0.769	1.3466e-07	0.1		0.989	90	0	1986	2020
Colorectal Carcinoma	C0009402	SMR3B	10879	P02814	submaxillary gland androgen regulated protein 3B		74	0.601	0.654	0.38712	0.1		1	18	0	2001	2019
Colorectal Carcinoma	C0009402	CHEK1	1111	O14757	checkpoint kinase 1	Kinase	195	0.492	0.808	3.14e-08	0.1		1	10	2	2007	2019
Colorectal Carcinoma	C0009402	PTP4A3	11156	O75365	protein tyrosine phosphatase 4A3		106	0.566	0.654	0.045489	0.1		1	23	0	2001	2019
Colorectal Carcinoma	C0009402	RASSF1	11186	Q9NS23	Ras association domain family member 1	Enzyme modulator	400	0.42	0.808	4.9255e-06	0.1		0.958	24	0	2002	2019
Colorectal Carcinoma	C0009402	IL17F	112744	Q96PD4	interleukin 17F		236	0.48	0.808	0.039165	0.1		0.818	11	2	2014	2019
Colorectal Carcinoma	C0009402	BTBD9	114781	Q96Q07	BTB domain containing 9		27	0.691	0.423	7.0655e-09	0.1		1	1	1	2017	2017
Colorectal Carcinoma	C0009402	SLC25A26	115286	Q70HW3	solute carrier family 25 member 26	Transporter	40	0.716	0.308	2.5832e-07	0.1		1	1	1	2019	2019
Colorectal Carcinoma	C0009402	H3P23	115482696		H3 histone pseudogene 23		310	0.443	0.769		0.1		0.95	20	0	1997	2019
Colorectal Carcinoma	C0009402	H3P10	115482713		H3 histone pseudogene 10		769	0.35	0.846		0.1		0.906	53	0	1999	2019
Colorectal Carcinoma	C0009402	CLU	1191	P10909	clusterin		412	0.426	0.885	7.8072e-05	0.1		1	10	0	2005	2020
Colorectal Carcinoma	C0009402	COL2A1	1280	P02458	collagen type II alpha 1 chain		496	0.444	0.846	1	0.1		1	18	0	2010	2020
Colorectal Carcinoma	C0009402	COL4A2	1284	P08572	collagen type IV alpha 2 chain		131	0.563	0.654	3.5842e-15	0.1		1	2	2	2019	2019
Colorectal Carcinoma	C0009402	PIGU	128869	Q9H490	phosphatidylinositol glycan anchor biosynthesis class U		51	0.67	0.462	1.9003e-05	0.1		1	1	1	2019	2019
Colorectal Carcinoma	C0009402	PPP1R21	129285	Q6ZMI0	protein phosphatase 1 regulatory subunit 21		17	0.769	0.231	1.3024e-10	0.1		1	1	1	2019	2019
Colorectal Carcinoma	C0009402	COL11A2	1302	P13942	collagen type XI alpha 2 chain		399	0.435	0.846	0.70197	0.1		1	10	1	2010	2019
Colorectal Carcinoma	C0009402	SLCO6A1	133482	Q86UG4	solute carrier organic anion transporter family member 6A1	Transporter	449	0.412	0.885	2.8807e-11	0.1		0.962	26	1	1995	2019
Colorectal Carcinoma	C0009402	COX8A	1351	P10176	cytochrome c oxidase subunit 8A	Enzyme	526	0.4	0.846	0.11606	0.1		1	12	0	2003	2019
Colorectal Carcinoma	C0009402	CLDN7	1366	O95471	claudin 7	Cell-cell junction	192	0.494	0.808	0.0028828	0.1		1	22	0	2001	2019
Colorectal Carcinoma	C0009402	CRK	1398	P46108	CRK proto-oncogene, adaptor protein		544	0.394	0.923	0.95936	0.1		1	13	0	2000	2020
Colorectal Carcinoma	C0009402	CRP	1401	P02741	C-reactive protein		1483	0.299	0.962	0.0036969	0.1		0.972	36	2	2009	2020
Colorectal Carcinoma	C0009402	RIPOR3	140876	Q96MK2	RIPOR family member 3		12	0.792	0.077	7.0058e-20	0.1		1	1	1	2019	2019
Colorectal Carcinoma	C0009402	MAPK14	1432	Q16539	mitogen-activated protein kinase 14	Kinase	626	0.379	0.923	0.37466	0.1		1	14	0	2000	2020
Colorectal Carcinoma	C0009402	CBLN2	147381	Q8IUK8	cerebellin 2 precursor		19	0.751	0.308	0.12162	0.1		1	1	1	2017	2017
Colorectal Carcinoma	C0009402	CTLA4	1493	P16410	cytotoxic T-lymphocyte associated protein 4		722	0.369	0.923	0.94085	0.1		0.867	15	2	2007	2019
Colorectal Carcinoma	C0009402	NEK10	152110	Q6ZWH5	NIMA related kinase 10	Kinase	29	0.705	0.269	7.6572e-10	0.1		1	1	1	2016	2016
Colorectal Carcinoma	C0009402	ZNF827	152485	Q17R98	zinc finger protein 827	Transcription factor	22	0.769	0.192	0.99965	0.1		1	1	2	2018	2018
Colorectal Carcinoma	C0009402	CYP1A1	1543	P04798	cytochrome P450 family 1 subfamily A member 1	Enzyme	379	0.436	0.846	1.0635e-17	0.1		0.794	34	3	1994	2018
Colorectal Carcinoma	C0009402	CYP2C9	1559	P11712	cytochrome P450 family 2 subfamily C member 9		201	0.506	0.885	1.2709e-10	0.1		0.933	15	3	2001	2020
Colorectal Carcinoma	C0009402	CYP2E1	1571	P05181	cytochrome P450 family 2 subfamily E member 1		306	0.459	0.885	8.0688e-09	0.1		0.85	20	3	2002	2019
Colorectal Carcinoma	C0009402	CBLL2	158506	Q8N7E2	Cbl proto-oncogene like 2	Enzyme	235	0.476	0.808		0.1		1	12	0	2004	2019
Colorectal Carcinoma	C0009402	CYP24A1	1591	Q07973	cytochrome P450 family 24 subfamily A member 1	Enzyme	171	0.518	0.692	3.1964e-23	0.1		1	13	6	2010	2018
Colorectal Carcinoma	C0009402	DENND5B	160518	Q6ZUT9	DENN domain containing 5B		13	0.792	0.115	1	0.1		1	1	1	2019	2019
Colorectal Carcinoma	C0009402	RETREG3	162427	Q86VR2	reticulophagy regulator family member 3		12	0.792	0.077	0.13001	0.1		1	1	1	2015	2015
Colorectal Carcinoma	C0009402	ACE	1636	P12821	angiotensin I converting enzyme	Enzyme	1082	0.328	0.923	1.0344e-37	0.1		0.867	15	1	2007	2020
Colorectal Carcinoma	C0009402	DDX53	168400	Q86TM3	DEAD-box helicase 53		117	0.568	0.846	0.66167	0.1		1	19	0	1995	2019
Colorectal Carcinoma	C0009402	SPIN3	169981	Q5JUX0	spindlin family member 3		5	0.931	0.077	0.77837	0.1		1	1	1	2012	2012
Colorectal Carcinoma	C0009402	DLD	1738	P09622	dihydrolipoamide dehydrogenase	Enzyme	190	0.517	0.769	0.0095142	0.1		1	39	1	1996	2019
Colorectal Carcinoma	C0009402	DNMT1	1786	P26358	DNA methyltransferase 1	Epigenetic regulator	496	0.406	0.885	1	0.1		0.944	18	1	1999	2020
Colorectal Carcinoma	C0009402	DNMT3B	1789	Q9UBC3	DNA methyltransferase 3 beta		315	0.453	0.846	0.19964	0.1		0.778	18	3	2008	2019
Colorectal Carcinoma	C0009402	DOCK3	1795	Q8IZD9	dedicator of cytokinesis 3		85	0.619	0.692	1	0.1		1	1	1	2017	2017
Colorectal Carcinoma	C0009402	JAG1	182	P78504	jagged canonical Notch ligand 1		420	0.429	0.808	1	0.1		1	15	0	2009	2019
Colorectal Carcinoma	C0009402	E2F1	1869	Q01094	E2F transcription factor 1	Nucleic acid binding	324	0.441	0.846	0.9877	0.1		1	19	0	1999	2020
Colorectal Carcinoma	C0009402	NR0B1	190	P51843	nuclear receptor subfamily 0 group B member 1	Nuclear receptor	222	0.494	0.808	0.97025	0.1		1	18	0	2010	2020
Colorectal Carcinoma	C0009402	EGF	1950	P01133	epidermal growth factor		774	0.357	0.923	8.5294e-17	0.1		0.985	68	1	1999	2020
Colorectal Carcinoma	C0009402	EPHA2	1969	P29317	EPH receptor A2	Kinase	187	0.501	0.731	1.073e-05	0.1		0.9	10	0	2009	2019
Colorectal Carcinoma	C0009402	EPAS1	2034	Q99814	endothelial PAS domain protein 1	Transcription factor	293	0.454	0.731	0.5961	0.1		1	10	0	2008	2019
Colorectal Carcinoma	C0009402	EPHB2	2048	P29323	EPH receptor B2	Kinase	649	0.374	0.846	0.99997	0.1		1	68	2	2001	2020
Colorectal Carcinoma	C0009402	EPHB4	2050	P54760	EPH receptor B4	Kinase	157	0.524	0.692	0.013497	0.1		1	11	0	2006	2020
Colorectal Carcinoma	C0009402	ERBB2	2064	P04626	erb-b2 receptor tyrosine kinase 2	Kinase	995	0.328	0.923	0.0059892	0.1		0.972	106	6	1992	2020
Colorectal Carcinoma	C0009402	ERBB3	2065	P21860	erb-b2 receptor tyrosine kinase 3	Kinase	318	0.448	0.808	1.7003e-15	0.1		0.962	26	1	1998	2020
Colorectal Carcinoma	C0009402	ERCC1	2067	P07992	ERCC excision repair 1, endonuclease non-catalytic subunit	Enzyme	345	0.445	0.846	1.5933e-07	0.1		0.857	35	5	2004	2019
Colorectal Carcinoma	C0009402	EREG	2069	O14944	epiregulin	Signaling	121	0.554	0.692	1.1659e-05	0.1		0.9	10	0	2011	2019
Colorectal Carcinoma	C0009402	ERCC5	2073	P28715	ERCC excision repair 5, endonuclease		238	0.499	0.731	2.732e-13	0.1		0.917	12	5	2009	2019
Colorectal Carcinoma	C0009402	ESR1	2099	P03372	estrogen receptor 1	Nuclear receptor	1101	0.324	0.962	0.9992	0.1		0.958	24	1	1997	2019
Colorectal Carcinoma	C0009402	ETS1	2113	P14921	ETS proto-oncogene 1, transcription factor	Transcription factor	327	0.444	0.731	0.7816	0.1		0.9	10	0	2001	2019
Colorectal Carcinoma	C0009402	ALB	213	P02768	albumin	Transporter	1198	0.317	0.962	0.64329	0.1		0.938	16	0	2004	2019
Colorectal Carcinoma	C0009402	EZH2	2146	Q15910	enhancer of zeste 2 polycomb repressive complex 2 subunit	Epigenetic regulator	653	0.376	0.885	1	0.1		0.978	46	2	2010	2020
Colorectal Carcinoma	C0009402	F3	2152	P13726	coagulation factor III, tissue factor	Receptor	456	0.415	0.846	0.018872	0.1		1	10	0	1997	2019
Colorectal Carcinoma	C0009402	ALDH1A1	216	P00352	aldehyde dehydrogenase 1 family member A1	Enzyme	270	0.46	0.846	0.95448	0.1		0.941	17	0	2010	2019
Colorectal Carcinoma	C0009402	FANCC	2176	Q00597	FA complementation group C		218	0.507	0.808	2.7921e-13	0.1		1	1	1	2016	2016
Colorectal Carcinoma	C0009402	FANCE	2178	Q9HB96	FA complementation group E		144	0.553	0.808	1.5278e-06	0.1		1	1	1	2016	2016
Colorectal Carcinoma	C0009402	FAP	2191	Q12884	fibroblast activation protein alpha	Enzyme	216	0.496	0.808	1.9009e-28	0.1		1	16	0	1987	2020
Colorectal Carcinoma	C0009402	FASN	2194	P49327	fatty acid synthase	Enzyme	245	0.474	0.846	1	0.1		1	21	0	2000	2019
Colorectal Carcinoma	C0009402	RTKN2	219790	Q8IZC4	rhotekin 2		22	0.722	0.385	5.4633e-15	0.1		1	1	1	2014	2014
Colorectal Carcinoma	C0009402	FCGR3A	2214	P08637	Fc fragment of IgG receptor IIIa	Cell adhesion	352	0.432	0.962	3.6955e-06	0.1		1	10	0	2010	2020
Colorectal Carcinoma	C0009402	FGF2	2247	P09038	fibroblast growth factor 2	Signaling	635	0.383	0.923	0.0184	0.1		1	10	0	1999	2017
Colorectal Carcinoma	C0009402	FGFR4	2264	P22455	fibroblast growth factor receptor 4	Kinase	220	0.49	0.769	7.1917e-13	0.1		1	11	1	2003	2019
Colorectal Carcinoma	C0009402	FHIT	2272	P49789	fragile histidine triad diadenosine triphosphatase		337	0.444	0.846	0.0057055	0.1		1	16	0	1996	2018
Colorectal Carcinoma	C0009402	SCAF8	22828	Q9UPN6	SR-related CTD associated factor 8	Nucleic acid binding	12	0.78	0.269	1	0.1		1	1	1	2015	2015
Colorectal Carcinoma	C0009402	ZHX2	22882	Q9Y6X8	zinc fingers and homeoboxes 2	Transcription factor	172	0.51	0.654	0.03372	0.1		0.966	29	0	2006	2019
Colorectal Carcinoma	C0009402	PCNX1	22990	Q96RV3	pecanex 1		12	0.792	0.115	1	0.1		1	1	2	2016	2016
Colorectal Carcinoma	C0009402	PLCH1	23007	Q4KWH8	phospholipase C eta 1	Enzyme	17	0.736	0.154	0.39649	0.1		1	1	1	2018	2018
Colorectal Carcinoma	C0009402	MYO16	23026	Q9Y6X6	myosin XVI		33	0.722	0.308	0.99851	0.1		1	1	1	2017	2017
Colorectal Carcinoma	C0009402	FOXM1	2305	Q08050	forkhead box M1		323	0.441	0.769	0.0007414	0.1		1	30	0	2007	2019
Colorectal Carcinoma	C0009402	FOXO3	2309	O43524	forkhead box O3		381	0.431	0.808	0.98806	0.1		1	13	0	2012	2020
Colorectal Carcinoma	C0009402	TBC1D9	23158	Q6ZT07	TBC1 domain family member 9	Enzyme	491	0.399	0.846	2.8039e-05	0.1		0.927	41	0	1990	2019
Colorectal Carcinoma	C0009402	FLT1	2321	P17948	fms related receptor tyrosine kinase 1	Kinase	424	0.419	0.846	0.99983	0.1		1	19	1	2003	2020
Colorectal Carcinoma	C0009402	FLT4	2324	P35916	fms related receptor tyrosine kinase 4	Kinase	306	0.457	0.808	1	0.1		0.923	13	0	2002	2019
Colorectal Carcinoma	C0009402	SIRT1	23411	Q96EB6	sirtuin 1	Epigenetic regulator	675	0.378	0.885	0.087326	0.1		1	32	1	2009	2019
Colorectal Carcinoma	C0009402	MACF1	23499	Q9UPN3	microtubule actin crosslinking factor 1	Cellular structure	62	0.659	0.538	1	0.1		1	1	2	2016	2016
Colorectal Carcinoma	C0009402	FOS	2353	P01100	Fos proto-oncogene, AP-1 transcription factor subunit	Transcription factor	528	0.411	0.885	0.26176	0.1		1	13	2	2004	2019
Colorectal Carcinoma	C0009402	FOSB	2354	P53539	FosB proto-oncogene, AP-1 transcription factor subunit	Transcription factor	278	0.463	0.846	0.97553	0.1		1	11	0	2004	2019
Colorectal Carcinoma	C0009402	SMUG1	23583	Q53HV7	single-strand-selective monofunctional uracil-DNA glycosylase 1		1034	0.322	0.923	0.00045154	0.1		1	18	0	2006	2020
Colorectal Carcinoma	C0009402	ALK	238	Q9UM73	ALK receptor tyrosine kinase	Kinase	519	0.396	0.846	3.2299e-06	0.1		1	16	0	2012	2019
Colorectal Carcinoma	C0009402	ALOX15	246	P16050	arachidonate 15-lipoxygenase	Enzyme	205	0.502	0.846	1.1397e-23	0.1		0.929	14	0	1999	2019
Colorectal Carcinoma	C0009402	MTOR	2475	P42345	mechanistic target of rapamycin kinase	Kinase	960	0.343	0.885	1	0.1		0.964	28	1	2009	2019
Colorectal Carcinoma	C0009402	GAST	2520	P01350	gastrin		236	0.485	0.808	0.0027394	0.1		0.917	24	0	1993	2019
Colorectal Carcinoma	C0009402	GABPA	2551	Q06546	GA binding protein transcription factor subunit alpha	Transcription factor	632	0.379	0.885	0.99812	0.1		0.917	24	0	2012	2020
Colorectal Carcinoma	C0009402	RNF19A	25897	Q9NV58	ring finger protein 19A, RBR E3 ubiquitin protein ligase	Enzyme	523	0.397	0.923	0.025305	0.1		1	13	0	2000	2020
Colorectal Carcinoma	C0009402	PNKD	25953	Q8N490	PNKD metallo-beta-lactamase domain containing		96	0.615	0.615	4.1392e-08	0.1		1	4	3	2018	2019
Colorectal Carcinoma	C0009402	POLDIP2	26073	Q9Y2S7	DNA polymerase delta interacting protein 2		530	0.396	0.923	0.41407	0.1		1	13	0	2000	2020
Colorectal Carcinoma	C0009402	PRPF31	26121	Q8WWY3	pre-mRNA processing factor 31	Nucleic acid binding	150	0.531	0.731	0.98313	0.1		1	13	0	2014	2020
Colorectal Carcinoma	C0009402	ZBTB20	26137	Q9HC78	zinc finger and BTB domain containing 20		139	0.566	0.731	0.97382	0.1		1	1	1	2018	2018
Colorectal Carcinoma	C0009402	GBAP1	2630		glucosylceramidase beta pseudogene 1		64	0.623	0.538		0.1		1	1	1	2016	2016
Colorectal Carcinoma	C0009402	OR1J2	26740	Q8NGS2	olfactory receptor family 1 subfamily J member 2	G-protein coupled receptor	10	0.792	0.154	0.093349	0.1		1	1	1	2017	2017
Colorectal Carcinoma	C0009402	ACAD8	27034	Q9UKU7	acyl-CoA dehydrogenase family member 8	Enzyme	203	0.506	0.885	5.6389e-14	0.1		1	19	0	2004	2019
Colorectal Carcinoma	C0009402	PDCD4	27250	Q53EL6	programmed cell death 4	Nucleic acid binding	198	0.494	0.769	3.3572e-07	0.1		1	17	0	2008	2020
Colorectal Carcinoma	C0009402	HPGDS	27306	O60760	hematopoietic prostaglandin D synthase		570	0.388	0.923	1.8063e-06	0.1		0.979	47	1	1995	2018
Colorectal Carcinoma	C0009402	GLI1	2735	P08151	GLI family zinc finger 1		369	0.431	0.846	7.6639e-14	0.1		1	13	0	2006	2020
Colorectal Carcinoma	C0009402	SGSM3	27352	Q96HU1	small G protein signaling modulator 3	Enzyme	259	0.469	0.808	3.4061e-15	0.1		0.909	11	0	2004	2019
Colorectal Carcinoma	C0009402	ZMIZ1-AS1	283050		ZMIZ1 antisense RNA 1		17	0.78	0.115		0.1		1	6	1	2014	2019
Colorectal Carcinoma	C0009402	NEAT1	283131		nuclear paraspeckle assembly transcript 1		179	0.502	0.769		0.1		0.7	10	0	2015	2020
Colorectal Carcinoma	C0009402	MAMSTR	284358	Q6ZN01	MEF2 activating motif and SAP domain containing transcriptional regulator		16	0.792	0.115	0.0054856	0.1		1	1	1	2019	2019
Colorectal Carcinoma	C0009402	FAM182A	284800	Q5T1J6	family with sequence similarity 182 member A		10	0.805	0.077		0.1		1	1	1	2015	2015
Colorectal Carcinoma	C0009402	DCBLD1	285761	Q8N8Z6	discoidin, CUB and LCCL domain containing 1		21	0.729	0.231	6.325e-08	0.1		1	1	2	2015	2015
Colorectal Carcinoma	C0009402	BABAM1	29086	Q9NWV8	BRISC and BRCA1 A complex member 1		27	0.678	0.385	0.96269	0.1		1	1	1	2016	2016
Colorectal Carcinoma	C0009402	CD274	29126	Q9NZQ7	CD274 molecule	Receptor	1011	0.324	0.923	0.01916	0.1		1	102	0	2013	2020
Colorectal Carcinoma	C0009402	CXCL1	2919	P09341	C-X-C motif chemokine ligand 1	Signaling	315	0.449	0.923	0.11845	0.1		1	10	0	2006	2019
Colorectal Carcinoma	C0009402	GSK3B	2932	P49841	glycogen synthase kinase 3 beta	Kinase	393	0.43	0.846	0.95571	0.1		1	16	2	2011	2019
Colorectal Carcinoma	C0009402	GSTM2	2946	P28161	glutathione S-transferase mu 2		195	0.488	0.808	3.3913e-07	0.1		1	11	2	2000	2018
Colorectal Carcinoma	C0009402	GSTP1	2950	P09211	glutathione S-transferase pi 1		610	0.383	0.923	0.014155	0.1		0.867	45	3	2001	2019
Colorectal Carcinoma	C0009402	GSTT1	2952	P30711	glutathione S-transferase theta 1		541	0.393	0.923	0.00014834	0.1		0.881	42	0	1995	2019
Colorectal Carcinoma	C0009402	HFE	3077	Q30201	homeostatic iron regulator		415	0.436	0.846	2.5587e-08	0.1		1	10	2	2003	2019
Colorectal Carcinoma	C0009402	HGF	3082	P14210	hepatocyte growth factor	Enzyme	671	0.374	0.885	0.99947	0.1		1	26	0	2000	2019
Colorectal Carcinoma	C0009402	HIF1A	3091	Q16665	hypoxia inducible factor 1 subunit alpha	Transcription factor	1044	0.327	0.923	0.9777	0.1		0.976	82	1	2003	2020
Colorectal Carcinoma	C0009402	HLA-A	3105	P04439	major histocompatibility complex, class I, A		672	0.37	0.846	0.0013299	0.1		1	14	2	1989	2019
Colorectal Carcinoma	C0009402	HMGB1	3146	P09429	high mobility group box 1	Nucleic acid binding	724	0.368	0.923	0.82035	0.1		1	21	0	2003	2020
Colorectal Carcinoma	C0009402	HNF4A	3172	P41235	hepatocyte nuclear factor 4 alpha	Nuclear receptor	340	0.461	0.808	0.15285	0.1		1	21	0	1997	2019
Colorectal Carcinoma	C0009402	HPGD	3248	P15428	15-hydroxyprostaglandin dehydrogenase		194	0.516	0.731	1.4357e-05	0.1		1	13	2	2005	2019
Colorectal Carcinoma	C0009402	HRAS	3265	P01112	HRas proto-oncogene, GTPase	Enzyme modulator	698	0.378	0.885	0.079774	0.1		0.946	37	2	1988	2019
Colorectal Carcinoma	C0009402	APEX1	328	P27695	apurinic/apyrimidinic endodeoxyribonuclease 1		305	0.458	0.846	1.9191e-07	0.1		0.842	19	2	2006	2019
Colorectal Carcinoma	C0009402	HES1	3280	Q14469	hes family bHLH transcription factor 1	Transcription factor	243	0.468	0.885	0.7072	0.1		1	10	0	2008	2019
Colorectal Carcinoma	C0009402	HSPA4	3308	P34932	heat shock protein family A (Hsp70) member 4		550	0.394	0.923	0.99954	0.1		1	12	0	2005	2019
Colorectal Carcinoma	C0009402	HSPA5	3309	P11021	heat shock protein family A (Hsp70) member 5		350	0.434	0.885	0.77341	0.1		0.917	12	2	2011	2019
Colorectal Carcinoma	C0009402	XIAP	331	P98170	X-linked inhibitor of apoptosis	Enzyme modulator	321	0.447	0.808	0.91837	0.1		1	10	0	2009	2019
Colorectal Carcinoma	C0009402	HSPB1	3315	P04792	heat shock protein family B (small) member 1		395	0.436	0.808	2.7797e-07	0.1		0.923	13	1	2007	2020
Colorectal Carcinoma	C0009402	HSPB2	3316	Q16082	heat shock protein family B (small) member 2		290	0.457	0.769	0.00032989	0.1		1	11	2	2007	2018
Colorectal Carcinoma	C0009402	HSP90AA1	3320	P07900	heat shock protein 90 alpha family class A member 1	Chaperone	455	0.411	0.923	0.86025	0.1		0.95	20	0	2012	2020
Colorectal Carcinoma	C0009402	ICAM1	3383	P05362	intercellular adhesion molecule 1		737	0.364	0.962	0.035295	0.1		1	12	3	1998	2019
Colorectal Carcinoma	C0009402	IFI27	3429	P40305	interferon alpha inducible protein 27		332	0.437	0.769	0.010698	0.1		0.95	20	0	1997	2019
Colorectal Carcinoma	C0009402	IFNG	3458	P01579	interferon gamma		1519	0.288	0.962	0.47156	0.1		0.958	24	0	2010	2019
Colorectal Carcinoma	C0009402	ECT2L	345930	Q008S8	epithelial cell transforming 2 like		13	0.769	0.192	7.8004e-48	0.1		1	1	1	2015	2015
Colorectal Carcinoma	C0009402	MACC1	346389	Q6ZN28	MET transcriptional regulator MACC1		102	0.561	0.538	6.0053e-19	0.1		1	29	1	2010	2019
Colorectal Carcinoma	C0009402	IGF1	3479	P05019	insulin like growth factor 1		1206	0.318	0.885	0.2716	0.1		0.937	63	2	1996	2020
Colorectal Carcinoma	C0009402	IGF1R	3480	P08069	insulin like growth factor 1 receptor	Kinase	556	0.399	0.885	0.96799	0.1		0.97	33	1	1998	2019
Colorectal Carcinoma	C0009402	SLC6A18	348932	Q96N87	solute carrier family 6 member 18		15	0.751	0.308	6.795e-22	0.1		1	2	2	2019	2019
Colorectal Carcinoma	C0009402	IGFBP7	3490	Q16270	insulin like growth factor binding protein 7		241	0.476	0.769	0.0012873	0.1		1	13	0	2004	2015
Colorectal Carcinoma	C0009402	TICAM2	353376	Q86XR7;Q9Y3B3	toll like receptor adaptor molecule 2		332	0.438	0.769	0.0025936	0.1		0.952	21	0	1997	2019
Colorectal Carcinoma	C0009402	IL1A	3552	P01583	interleukin 1 alpha		1002	0.333	0.962	0.0001602	0.1		0.929	14	5	2005	2019
Colorectal Carcinoma	C0009402	IL1B	3553	P01584	interleukin 1 beta		1801	0.276	0.962	0.13005	0.1		1	27	4	1997	2019
Colorectal Carcinoma	C0009402	IL2	3558	P60568	interleukin 2		950	0.336	0.885	0.47968	0.1		1	15	1	1995	2019
Colorectal Carcinoma	C0009402	IL4	3565	P05112	interleukin 4		996	0.332	0.962	0.0047372	0.1		0.75	16	1	1999	2019
Colorectal Carcinoma	C0009402	IL6	3569	P05231	interleukin 6		2367	0.248	0.962	0.31536	0.1		0.975	80	3	1993	2020
Colorectal Carcinoma	C0009402	IL10	3586	P22301	interleukin 10		1679	0.281	0.923	0.0058874	0.1		0.912	34	3	1999	2019
Colorectal Carcinoma	C0009402	IL17A	3605	Q16552	interleukin 17A		1074	0.324	0.923	0.043049	0.1		0.907	43	4	2008	2019
Colorectal Carcinoma	C0009402	IRS1	3667	P35568	insulin receptor substrate 1		233	0.488	0.769	0.023645	0.1		1	18	3	2004	2019
Colorectal Carcinoma	C0009402	ITGB1	3688	P05556	integrin subunit beta 1	Receptor	210	0.496	0.808	0.98208	0.1		0.923	13	3	2014	2020
Colorectal Carcinoma	C0009402	JAK2	3717	O60674	Janus kinase 2	Kinase	644	0.385	0.885	0.65372	0.1		1	15	0	2012	2019
Colorectal Carcinoma	C0009402	JUN	3725	P05412	Jun proto-oncogene, AP-1 transcription factor subunit	Transcription factor	344	0.442	0.885	0.05962	0.1		1	15	2	2004	2019
Colorectal Carcinoma	C0009402	JUNB	3726	P17275	JunB proto-oncogene, AP-1 transcription factor subunit	Transcription factor	264	0.467	0.769	0.86299	0.1		1	10	0	2004	2019
Colorectal Carcinoma	C0009402	JUND	3727	P17535	JunD proto-oncogene, AP-1 transcription factor subunit	Transcription factor	242	0.475	0.808	0.70054	0.1		1	10	0	2004	2019
Colorectal Carcinoma	C0009402	GSTK1	373156	Q9Y2Q3	glutathione S-transferase kappa 1		445	0.412	0.885	1.9374e-06	0.1		0.962	26	0	1995	2019
Colorectal Carcinoma	C0009402	AREG	374	P15514	amphiregulin	Signaling	221	0.487	0.769	0.35407	0.1		0.923	13	0	1991	2019
Colorectal Carcinoma	C0009402	KCNH1	3756	O95259	potassium voltage-gated channel subfamily H member 1	Ion channel	180	0.542	0.731	0.54625	0.1		1	1	1	2016	2016
Colorectal Carcinoma	C0009402	MALAT1	378938		metastasis associated lung adenocarcinoma transcript 1		336	0.435	0.846		0.1		1	22	2	2011	2019
Colorectal Carcinoma	C0009402	KISS1	3814	Q15726	KiSS-1 metastasis suppressor		179	0.507	0.808	0.49039	0.1		1	11	0	2013	2019
Colorectal Carcinoma	C0009402	KIT	3815	P10721	KIT proto-oncogene, receptor tyrosine kinase	Kinase	715	0.366	0.808	0.98087	0.1		0.842	19	0	2002	2019
Colorectal Carcinoma	C0009402	LEP	3952	P41159	leptin		931	0.349	0.846	0.46491	0.1		1	24	2	2007	2019
Colorectal Carcinoma	C0009402	LGALS3	3958	P17931	galectin 3	Signaling	557	0.392	0.846	2.3207e-05	0.1		1	15	0	1990	2019
Colorectal Carcinoma	C0009402	C17orf97	400566	Q6ZQX7	chromosome 17 open reading frame 97		117	0.548	0.577	4.8417e-06	0.1		0.885	26	0	1997	2019
Colorectal Carcinoma	C0009402	LINC00511	400619		long intergenic non-protein coding RNA 511		47	0.638	0.423		0.1		1	1	1	2019	2019
Colorectal Carcinoma	C0009402	LINC01121	400952		long intergenic non-protein coding RNA 1121		15	0.751	0.192		0.1		1	1	1	2015	2015
Colorectal Carcinoma	C0009402	LRP6	4040	O75581	LDL receptor related protein 6		134	0.536	0.808	0.69664	0.1		1	11	2	2007	2019
Colorectal Carcinoma	C0009402	LSAMP	4045	Q13449	limbic system associated membrane protein		107	0.558	0.654	0.98742	0.1		1	1	1	2015	2015
Colorectal Carcinoma	C0009402	LINC01194	404663		long intergenic non-protein coding RNA 1194		249	0.47	0.769		0.1		1	12	0	1993	2019
Colorectal Carcinoma	C0009402	MIR106A	406899		microRNA 106a		140	0.524	0.846		0.1		0.882	17	0	2010	2019
Colorectal Carcinoma	C0009402	MIR126	406913		microRNA 126		305	0.447	0.846		0.1		1	12	0	2011	2019
Colorectal Carcinoma	C0009402	MIR137	406928		microRNA 137		171	0.513	0.846		0.1		1	12	0	2009	2019
Colorectal Carcinoma	C0009402	MIR139	406931		microRNA 139		138	0.527	0.808		0.1		0.957	23	0	2011	2019
Colorectal Carcinoma	C0009402	MIR141	406933		microRNA 141		179	0.497	0.808		0.1		1	17	0	2010	2020
Colorectal Carcinoma	C0009402	MIR143	406935		microRNA 143		267	0.462	0.885		0.1		0.97	33	3	2007	2019
Colorectal Carcinoma	C0009402	MIR145	406937		microRNA 145		366	0.431	0.846		0.1		1	41	1	2007	2019
Colorectal Carcinoma	C0009402	MIR146A	406938		microRNA 146a		505	0.398	0.885		0.1		0.864	22	1	2012	2019
Colorectal Carcinoma	C0009402	MIR148A	406940		microRNA 148a		172	0.506	0.846		0.1		1	12	0	2010	2019
Colorectal Carcinoma	C0009402	MIR149	406941		microRNA 149		140	0.524	0.769		0.1		0.957	23	1	2012	2020
Colorectal Carcinoma	C0009402	MIR150	406942		microRNA 150		282	0.455	0.808		0.1		0.933	15	0	2012	2020
Colorectal Carcinoma	C0009402	MIR155	406947		microRNA 155		584	0.384	0.885		0.1		1	23	0	2010	2019
Colorectal Carcinoma	C0009402	MIR17	406952		microRNA 17		270	0.459	0.846		0.1		1	19	0	2009	2019
Colorectal Carcinoma	C0009402	MIR18A	406953		microRNA 18a		154	0.52	0.846		0.1		1	11	0	2013	2019
Colorectal Carcinoma	C0009402	MIR182	406958		microRNA 182		211	0.486	0.846		0.1		1	13	0	2013	2019
Colorectal Carcinoma	C0009402	MIR183	406959		microRNA 183		190	0.494	0.885		0.1		1	10	0	2013	2019
Colorectal Carcinoma	C0009402	MIR193A	406968		microRNA 193a		116	0.541	0.731		0.1		0.909	11	0	2013	2020
Colorectal Carcinoma	C0009402	MIR195	406971		microRNA 195		180	0.496	0.769		0.1		0.895	19	0	2009	2020
Colorectal Carcinoma	C0009402	MIR20A	406982		microRNA 20a		180	0.498	0.769		0.1		1	21	0	2011	2020
Colorectal Carcinoma	C0009402	MIR200B	406984		microRNA 200b		180	0.5	0.769		0.1		1	13	1	2014	2019
Colorectal Carcinoma	C0009402	MIR200C	406985		microRNA 200c		202	0.486	0.846		0.1		0.963	27	0	2012	2020
Colorectal Carcinoma	C0009402	MIR203A	406986		microRNA 203a		237	0.471	0.808		0.1		1	20	0	2011	2020
Colorectal Carcinoma	C0009402	MIR206	406989		microRNA 206		226	0.477	0.846		0.1		1	10	0	2014	2019
Colorectal Carcinoma	C0009402	MIR21	406991		microRNA 21		726	0.363	0.846		0.1		0.97	101	0	2007	2019
Colorectal Carcinoma	C0009402	MIR214	406996		microRNA 214		221	0.48	0.808		0.1		1	11	0	2012	2019
Colorectal Carcinoma	C0009402	MIR221	407006		microRNA 221		304	0.449	0.846		0.1		1	14	0	2010	2019
Colorectal Carcinoma	C0009402	MIR224	407009		microRNA 224		128	0.534	0.654		0.1		1	18	0	2009	2019
Colorectal Carcinoma	C0009402	MIR23A	407010		microRNA 23a		174	0.499	0.808		0.1		1	11	1	2012	2019
Colorectal Carcinoma	C0009402	MIR27A	407018		microRNA 27a		248	0.466	0.846		0.1		1	22	1	2011	2019
Colorectal Carcinoma	C0009402	MIR29A	407021		microRNA 29a		278	0.459	0.808		0.1		1	13	0	2012	2020
Colorectal Carcinoma	C0009402	MIR29B1	407024		microRNA 29b-1		212	0.485	0.846		0.1		1	10	0	2014	2019
Colorectal Carcinoma	C0009402	MIR29B2	407025		microRNA 29b-2		214	0.484	0.885		0.1		1	10	0	2014	2019
Colorectal Carcinoma	C0009402	MIR30A	407029		microRNA 30a		218	0.478	0.808		0.1		1	15	1	2012	2019
Colorectal Carcinoma	C0009402	MIR31	407035		microRNA 31		235	0.471	0.769		0.1		1	31	0	2009	2020
Colorectal Carcinoma	C0009402	MIR34A	407040		microRNA 34a		428	0.421	0.846		0.1		0.971	34	1	2011	2020
Colorectal Carcinoma	C0009402	MIR34B	407041		microRNA 34b		165	0.509	0.808		0.1		1	11	1	2008	2019
Colorectal Carcinoma	C0009402	EPCAM	4072	P16422	epithelial cell adhesion molecule		328	0.451	0.885	1.2844e-07	0.1		1	38	0	2000	2019
Colorectal Carcinoma	C0009402	MIR17HG	407975	Q75NE6	miR-17-92a-1 cluster host gene		224	0.483	0.808		0.1		1	10	4	2009	2019
Colorectal Carcinoma	C0009402	SMAD6	4091	O43541	SMAD family member 6	Transcription factor	93	0.579	0.731	3.6282e-20	0.1		1	2	2	2019	2019
Colorectal Carcinoma	C0009402	MCL1	4170	Q07820	MCL1 apoptosis regulator, BCL2 family member	Signaling	375	0.43	0.808	0.96349	0.1		1	10	0	2007	2019
Colorectal Carcinoma	C0009402	MDM2	4193	Q00987	MDM2 proto-oncogene	Nucleic acid binding	702	0.362	0.846	0.99981	0.1		0.909	33	2	1999	2020
Colorectal Carcinoma	C0009402	MET	4233	P08581	MET proto-oncogene, receptor tyrosine kinase	Kinase	594	0.38	0.846	0.96998	0.1		1	53	1	1992	2020
Colorectal Carcinoma	C0009402	MGMT	4255	P16455	O-6-methylguanine-DNA methyltransferase		444	0.412	0.885	1.1756e-07	0.1		0.956	68	7	1999	2019
Colorectal Carcinoma	C0009402	ASCL2	430	Q99929	achaete-scute family bHLH transcription factor 2	Transcription factor	38	0.691	0.423	0.34557	0.1		1	12	0	2010	2019
Colorectal Carcinoma	C0009402	MMP3	4314	P08254	matrix metallopeptidase 3	Enzyme	473	0.408	0.885	5.7362e-15	0.1		0.917	12	0	2002	2019
Colorectal Carcinoma	C0009402	MMP7	4316	P09237	matrix metallopeptidase 7	Enzyme	320	0.446	0.885	1.0404e-09	0.1		0.959	49	0	1993	2019
Colorectal Carcinoma	C0009402	MMP9	4318	P14780	matrix metallopeptidase 9	Enzyme	1337	0.305	0.923	1.8869e-17	0.1		0.984	61	5	1995	2019
Colorectal Carcinoma	C0009402	MPZ	4359	P25189	myelin protein zero		249	0.503	0.846	0.27158	0.1		1	18	0	2010	2020
Colorectal Carcinoma	C0009402	MRC1	4360	P22897	mannose receptor C-type 1		431	0.413	0.846	0.94335	0.1		0.951	247	1	1995	2020
Colorectal Carcinoma	C0009402	MIR133B	442890		microRNA 133b		109	0.555	0.808		0.1		1	13	0	2010	2019
Colorectal Carcinoma	C0009402	MIR135B	442891		microRNA 135b		111	0.554	0.731		0.1		1	13	0	2012	2018
Colorectal Carcinoma	C0009402	MIR338	442906		microRNA 338		128	0.535	0.808		0.1		1	11	0	2013	2019
Colorectal Carcinoma	C0009402	MSH3	4437	P20585	mutS homolog 3	Nucleic acid binding	245	0.474	0.769	7.4413e-31	0.1		0.962	26	2	1997	2020
Colorectal Carcinoma	C0009402	MST1	4485	P26927	macrophage stimulating 1	Enzyme	281	0.465	0.885	4.7831e-19	0.1		0.929	14	0	2007	2018
Colorectal Carcinoma	C0009402	MTR	4548	Q99707	5-methyltetrahydrofolate-homocysteine methyltransferase		245	0.482	0.808	2.4301e-12	0.1		0.7	10	3	1999	2019
Colorectal Carcinoma	C0009402	MTX1	4580	Q13505	metaxin 1		124	0.546	0.731	0.013271	0.1		1	1	1	2016	2016
Colorectal Carcinoma	C0009402	MUC1	4582	P15941	mucin 1, cell surface associated		594	0.384	0.885	0.018774	0.1		0.85	20	1	1994	2019
Colorectal Carcinoma	C0009402	MUC2	4583	Q02817	mucin 2, oligomeric mucus/gel-forming	Enzyme modulator	225	0.486	0.808	9.433e-10	0.1		0.969	32	0	1996	2019
Colorectal Carcinoma	C0009402	MUC5AC	4586	P98088	mucin 5AC, oligomeric mucus/gel-forming	Enzyme modulator	224	0.483	0.808	9.9887e-09	0.1		1	12	0	2000	2019
Colorectal Carcinoma	C0009402	ATM	472	Q13315	ATM serine/threonine kinase	Kinase	684	0.374	0.885	5.5884e-47	0.1		0.917	24	5	1999	2019
Colorectal Carcinoma	C0009402	DRG1	4733	Q9Y295	developmentally regulated GTP binding protein 1		43	0.682	0.346	0.32895	0.1		1	1	1	2017	2017
Colorectal Carcinoma	C0009402	NFKB1	4790	P19838	nuclear factor kappa B subunit 1	Transcription factor	551	0.396	0.923	1	0.1		1	18	6	2007	2019
Colorectal Carcinoma	C0009402	NHS	4810	Q6T4R5	NHS actin remodeling regulator		295	0.466	0.846	0.99999	0.1		1	10	0	2014	2019
Colorectal Carcinoma	C0009402	NOTCH1	4851	P46531	notch receptor 1		693	0.369	0.885	1	0.1		0.967	30	0	2001	2019
Colorectal Carcinoma	C0009402	NTRK1	4914	P04629	neurotrophic receptor tyrosine kinase 1	Kinase	443	0.422	0.808	1.9568e-06	0.1		0.846	13	1	2000	2019
Colorectal Carcinoma	C0009402	GPR143	4935	P51810	G protein-coupled receptor 143	G-protein coupled receptor	47	0.659	0.385	0.92526	0.1		1	1	1	2012	2012
Colorectal Carcinoma	C0009402	MIR375	494324		microRNA 375		226	0.476	0.769		0.1		1	20	0	2012	2020
Colorectal Carcinoma	C0009402	OGG1	4968	O15527	8-oxoguanine DNA glycosylase		313	0.453	0.808	3.9314e-12	0.1		0.69	29	10	2000	2019
Colorectal Carcinoma	C0009402	SERPINE1	5054	P05121	serpin family E member 1	Enzyme modulator	770	0.359	0.885	0.043609	0.1		1	18	1	2001	2019
Colorectal Carcinoma	C0009402	PAK1	5058	Q13153	p21 (RAC1) activated kinase 1	Kinase	221	0.494	0.808	0.0013306	0.1		1	16	0	2006	2018
Colorectal Carcinoma	C0009402	IL22	50616	Q9GZX6	interleukin 22		551	0.393	0.885	0.00018843	0.1		1	10	0	2013	2019
Colorectal Carcinoma	C0009402	PRKN	5071	O60260	parkin RBR E3 ubiquitin protein ligase	Enzyme	409	0.431	0.846	6.9346e-07	0.1		1	15	2	2004	2019
Colorectal Carcinoma	C0009402	FOXP3	50943	Q9BZS1	forkhead box P3		688	0.368	0.846	0.99424	0.1		1	33	1	2008	2019
Colorectal Carcinoma	C0009402	TMED7	51014	Q86XR7;Q9Y3B3	transmembrane p24 trafficking protein 7	Transporter	336	0.436	0.808	0.47966	0.1		0.952	21	0	1997	2019
Colorectal Carcinoma	C0009402	ADIPOR1	51094	Q96A54	adiponectin receptor 1	Receptor	148	0.529	0.808	0.6584	0.1		0.909	11	3	2008	2018
Colorectal Carcinoma	C0009402	PCNA	5111	P12004	proliferating cell nuclear antigen	Nucleic acid binding	581	0.382	0.846	0.97606	0.1		0.955	22	0	1993	2019
Colorectal Carcinoma	C0009402	PDCD1	5133	Q15116	programmed cell death 1		497	0.402	0.846	0.41706	0.1		1	16	2	2016	2019
Colorectal Carcinoma	C0009402	LIMA1	51474	Q9UHB6	LIM domain and actin binding 1	Enzyme	34	0.711	0.231	2.7465e-10	0.1		1	1	1	2014	2014
Colorectal Carcinoma	C0009402	IL23A	51561	Q9NPF7	interleukin 23 subunit alpha	Signaling	427	0.415	0.846	0.35806	0.1		1	11	0	2009	2018
Colorectal Carcinoma	C0009402	TDP2	51567	O95551	tyrosyl-DNA phosphodiesterase 2		65	0.628	0.462	1.134e-08	0.1		1	1	1	2015	2015
Colorectal Carcinoma	C0009402	GDE1	51573	Q9NZC3	glycerophosphodiester phosphodiesterase 1		228	0.481	0.808	6.1163e-06	0.1		0.9	10	0	2012	2019
Colorectal Carcinoma	C0009402	PIK3CB	5291	P42338	phosphatidylinositol-4,5-bisphosphate 3-kinase catalytic subunit beta	Kinase	1083	0.322	0.885	0.99964	0.1		0.993	151	1	2002	2020
Colorectal Carcinoma	C0009402	PIK3CD	5293	O00329	phosphatidylinositol-4,5-bisphosphate 3-kinase catalytic subunit delta	Kinase	1119	0.319	0.885	0.99999	0.1		0.994	154	0	2002	2020
Colorectal Carcinoma	C0009402	PIK3CG	5294	P48736	phosphatidylinositol-4,5-bisphosphate 3-kinase catalytic subunit gamma	Kinase	1101	0.32	0.885	1.4076e-06	0.1		0.993	151	0	2000	2020
Colorectal Carcinoma	C0009402	PKM	5315	P14618	pyruvate kinase M1/2	Kinase	237	0.482	0.808	0.8549	0.1		1	14	0	2012	2019
Colorectal Carcinoma	C0009402	PLAU	5328	P00749	plasminogen activator, urokinase	Enzyme	439	0.425	0.923	2.3058e-06	0.1		0.923	13	0	2001	2019
Colorectal Carcinoma	C0009402	PLK1	5347	P53350	polo like kinase 1	Kinase	253	0.467	0.808	0.97851	0.1		0.933	15	0	2001	2019
Colorectal Carcinoma	C0009402	PMP22	5376	Q01453	peripheral myelin protein 22	Cellular structure	341	0.471	0.885	0.90958	0.1		1	18	0	2010	2020
Colorectal Carcinoma	C0009402	UGT1A7	54577	Q9HAW7	UDP glucuronosyltransferase family 1 member A7		125	0.55	0.692	8.6636e-14	0.1		1	10	4	2002	2016
Colorectal Carcinoma	C0009402	L1TD1	54596	Q5T7N2	LINE1 type transposase domain containing 1		21	0.729	0.154	5.3285e-07	0.1		1	1	1	2019	2019
Colorectal Carcinoma	C0009402	POU5F1	5460	Q01860	POU class 5 homeobox 1		328	0.441	0.846	0.95371	0.1		0.929	14	0	2011	2019
Colorectal Carcinoma	C0009402	POU5F1B	5462	Q06416	POU class 5 homeobox 1B		36	0.67	0.346	0.00029118	0.1		1	19	9	2007	2019
Colorectal Carcinoma	C0009402	UGT1A1	54658	P22309	UDP glucuronosyltransferase family 1 member A1		302	0.464	0.769	3.2577e-06	0.1		1	32	2	2005	2019
Colorectal Carcinoma	C0009402	PPARD	5467	Q03181	peroxisome proliferator activated receptor delta	Nuclear receptor	197	0.513	0.846	0.99497	0.1		1	18	1	1999	2019
Colorectal Carcinoma	C0009402	TTC22	55001	Q5TAA0	tetratricopeptide repeat domain 22		12	0.78	0.077	1.7098e-06	0.1		1	2	2	2019	2019
Colorectal Carcinoma	C0009402	GPATCH1	55094	Q9BRR8	G-patch domain containing 1		12	0.792	0.154	1.5481e-11	0.1		1	1	1	2017	2017
Colorectal Carcinoma	C0009402	PLEKHG6	55200	Q3KR16	pleckstrin homology and RhoGEF domain containing G6		14	0.76	0.192	3.7173e-19	0.1		1	1	1	2019	2019
Colorectal Carcinoma	C0009402	ACOXL	55289	Q9NUZ1	acyl-CoA oxidase like	Enzyme	46	0.674	0.577	5.2479e-15	0.1		1	1	1	2014	2014
Colorectal Carcinoma	C0009402	CFAP44	55779	Q96MT7	cilia and flagella associated protein 44		17	0.792	0.077	6.1049e-15	0.1		1	1	1	2017	2017
Colorectal Carcinoma	C0009402	MYNN	55892	Q9NPC7	myoneurin		21	0.722	0.423	0.57129	0.1		1	1	2	2010	2010
Colorectal Carcinoma	C0009402	MAPK1	5594	P28482	mitogen-activated protein kinase 1	Kinase	1059	0.33	0.923	0.99698	0.1		1	69	0	2000	2020
Colorectal Carcinoma	C0009402	MAPK3	5595	P27361	mitogen-activated protein kinase 3	Kinase	647	0.379	0.885	0.036884	0.1		1	28	0	2007	2020
Colorectal Carcinoma	C0009402	GNG12	55970	Q9UBI6	G protein subunit gamma 12	Enzyme modulator	15	0.78	0.154	0.58936	0.1		1	1	1	2017	2017
Colorectal Carcinoma	C0009402	MAPK8	5599	P45983	mitogen-activated protein kinase 8	Kinase	520	0.397	0.885	0.99823	0.1		1	15	0	2000	2019
Colorectal Carcinoma	C0009402	MAP2K1	5604	Q02750	mitogen-activated protein kinase kinase 1	Kinase	389	0.439	0.846	0.89669	0.1		0.938	16	0	2008	2019
Colorectal Carcinoma	C0009402	MAP2K7	5609	O14733	mitogen-activated protein kinase kinase 7	Kinase	408	0.419	0.808	0.99552	0.1		1	48	0	2008	2019
Colorectal Carcinoma	C0009402	PRNP	5621	F7VJQ1;P04156	prion protein		426	0.445	0.923	0.00063182	0.1		1	11	1	2008	2019
Colorectal Carcinoma	C0009402	EIF4ENIF1	56478	Q9NRA8	eukaryotic translation initiation factor 4E nuclear import factor 1		14	0.76	0.192	0.99999	0.1		1	1	1	2017	2017
Colorectal Carcinoma	C0009402	PSG2	5670	P11465	pregnancy specific beta-1-glycoprotein 2		210	0.492	0.731	1.382e-30	0.1		0.988	86	0	1986	2020
Colorectal Carcinoma	C0009402	CHPT1	56994	Q8WUD6	choline phosphotransferase 1	Enzyme	253	0.474	0.846	0.00024252	0.1		1	41	0	2000	2019
Colorectal Carcinoma	C0009402	SLC12A9	56996	Q9BXP2	solute carrier family 12 member 9	Transporter	280	0.454	0.769	1.1806e-15	0.1		1	18	0	1995	2018
Colorectal Carcinoma	C0009402	BAAT	570	Q14032	bile acid-CoA:amino acid N-acyltransferase		98	0.578	0.654	7.8651e-08	0.1		1	12	0	1999	2019
Colorectal Carcinoma	C0009402	PSMD9	5715	O00233	proteasome 26S subunit, non-ATPase 9	Enzyme modulator	344	0.435	0.846	4.8603e-06	0.1		0.95	20	1	1997	2019
Colorectal Carcinoma	C0009402	PTGS1	5742	P23219	prostaglandin-endoperoxide synthase 1	Enzyme	318	0.46	0.885	6.2425e-07	0.1		1	17	6	1994	2020
Colorectal Carcinoma	C0009402	MIR451A	574411		microRNA 451a		177	0.505	0.769		0.1		1	11	0	2009	2019
Colorectal Carcinoma	C0009402	MIR497	574456		microRNA 497		116	0.539	0.808		0.1		0.909	11	0	2013	2020
Colorectal Carcinoma	C0009402	NDRG2	57447	Q9UN36	NDRG family member 2	Enzyme	156	0.518	0.692	2.2044e-05	0.1		1	11	0	2007	2019
Colorectal Carcinoma	C0009402	PREX1	57580	Q8TCU6	phosphatidylinositol-3,4,5-trisphosphate dependent Rac exchange factor 1	Enzyme modulator	52	0.644	0.615	1	0.1		1	4	1	2015	2019
Colorectal Carcinoma	C0009402	DIP2B	57609	Q9P265	disco interacting protein 2 homolog B		27	0.76	0.308	0.99924	0.1		1	1	1	2015	2015
Colorectal Carcinoma	C0009402	PVT1	5820		Pvt1 oncogene		190	0.495	0.731		0.1		1	13	0	2014	2019
Colorectal Carcinoma	C0009402	RAC1	5879	P63000	Rac family small GTPase 1	Enzyme modulator	415	0.429	0.962	0.76228	0.1		1	13	0	2007	2019
Colorectal Carcinoma	C0009402	RAD51	5888	Q06609	RAD51 recombinase		363	0.447	0.846	0.026578	0.1		0.9	10	0	2011	2019
Colorectal Carcinoma	C0009402	RAD51B	5890	O15315	RAD51 paralog B		126	0.556	0.769	2.079e-15	0.1		1	1	1	2016	2016
Colorectal Carcinoma	C0009402	RAF1	5894	P04049	Raf-1 proto-oncogene, serine/threonine kinase	Kinase	470	0.418	0.885	0.85295	0.1		0.974	39	2	1996	2019
Colorectal Carcinoma	C0009402	RELA	5970	Q04206	RELA proto-oncogene, NF-kB subunit	Transcription factor	483	0.406	0.885	0.99948	0.1		1	10	0	2004	2019
Colorectal Carcinoma	C0009402	REV3L	5980	O60673	REV3 like, DNA directed polymerase zeta catalytic subunit		95	0.588	0.654	1	0.1		1	1	2	2016	2016
Colorectal Carcinoma	C0009402	ACTB	60	P60709	actin beta	Cellular structure	1110	0.325	0.923	0.98564	0.1		1	25	0	1998	2019
Colorectal Carcinoma	C0009402	RNF4	6047	P78317	ring finger protein 4		27	0.705	0.462	0.79973	0.1		1	1	1	2017	2017
Colorectal Carcinoma	C0009402	GAS5	60674		growth arrest specific 5		184	0.497	0.808		0.1		1	15	2	2014	2019
Colorectal Carcinoma	C0009402	ROS1	6098	P08922	ROS proto-oncogene 1, receptor tyrosine kinase	Kinase	356	0.439	0.885	1.6184e-72	0.1		1	10	0	2013	2019
Colorectal Carcinoma	C0009402	S100A4	6275	P26447	S100 calcium binding protein A4	Calcium-binding protein	308	0.448	0.769	0.0061838	0.1		1	20	0	1996	2019
Colorectal Carcinoma	C0009402	SATB1	6304	Q01826	SATB homeobox 1	Transcription factor	147	0.525	0.769	0.99051	0.1		1	13	0	2012	2019
Colorectal Carcinoma	C0009402	ATXN2	6311	Q99700	ataxin 2	Nucleic acid binding	341	0.482	0.808	0.85289	0.1		1	6	2	2015	2019
Colorectal Carcinoma	C0009402	CCL2	6347	P13500	C-C motif chemokine ligand 2	Signaling	1157	0.321	0.962	0.60786	0.1		1	11	1	2007	2019
Colorectal Carcinoma	C0009402	CCL20	6364	P78556	C-C motif chemokine ligand 20	Signaling	242	0.474	0.846	0.00024242	0.1		1	12	0	2006	2019
Colorectal Carcinoma	C0009402	CXCL12	6387	P48061	C-X-C motif chemokine ligand 12		626	0.379	0.846	0.11851	0.1		0.962	26	1	2005	2020
Colorectal Carcinoma	C0009402	NOD2	64127	Q9HC29	nucleotide binding oligomerization domain containing 2	Enzyme	434	0.423	0.923	1.9834e-30	0.1		0.818	22	4	2000	2019
Colorectal Carcinoma	C0009402	POU5F1P3	642559		POU class 5 homeobox 1 pseudogene 3		285	0.452	0.808		0.1		0.917	12	0	2011	2019
Colorectal Carcinoma	C0009402	CRNDE	643911		colorectal neoplasia differentially expressed		70	0.597	0.615		0.1		1	10	0	2014	2019
Colorectal Carcinoma	C0009402	POU5F1P4	645682		POU class 5 homeobox 1 pseudogene 4		284	0.452	0.808		0.1		0.923	13	0	2011	2019
Colorectal Carcinoma	C0009402	CRTC3	64784	Q6UUV7	CREB regulated transcription coactivator 3	Transcription factor	27	0.705	0.269	0.86585	0.1		1	2	2	2017	2019
Colorectal Carcinoma	C0009402	BMI1	648	P35226	BMI1 proto-oncogene, polycomb ring finger		309	0.448	0.808	0.94286	0.1		1	19	0	2010	2019
Colorectal Carcinoma	C0009402	SLC2A1	6513	P11166	solute carrier family 2 member 1	Transporter	687	0.388	0.808	0.9941	0.1		0.938	16	0	1996	2019
Colorectal Carcinoma	C0009402	UCA1	652995		urothelial cancer associated 1		152	0.512	0.808		0.1		1	17	0	2014	2019
Colorectal Carcinoma	C0009402	SNAI1	6615	O95863	snail family transcriptional repressor 1		243	0.474	0.808	0.21754	0.1		1	17	0	2009	2019
Colorectal Carcinoma	C0009402	FSCN1	6624	Q16658	fascin actin-bundling protein 1	Cellular structure	175	0.504	0.731	0.86852	0.1		0.917	12	0	2006	2018
Colorectal Carcinoma	C0009402	SOX2	6657	P48431	SRY-box transcription factor 2	Transcription factor	503	0.405	0.808	0.70662	0.1		0.944	18	0	2007	2020
Colorectal Carcinoma	C0009402	SOX9	6662	P48436	SRY-box transcription factor 9		466	0.419	0.846	0.99772	0.1		1	19	0	2008	2019
Colorectal Carcinoma	C0009402	SPP1	6696	P10451	secreted phosphoprotein 1		824	0.353	0.885	2.146e-06	0.1		0.963	27	2	2007	2019
Colorectal Carcinoma	C0009402	BRCA1	672	P38398	BRCA1 DNA repair associated	Enzyme	747	0.367	0.923	9.2157e-29	0.1		1	28	0	1998	2019
Colorectal Carcinoma	C0009402	SST	6750	P61278	somatostatin	Signaling	535	0.399	0.885	0.34128	0.1		1	10	0	1996	2019
Colorectal Carcinoma	C0009402	STAT1	6772	P42224	signal transducer and activator of transcription 1	Nucleic acid binding	531	0.399	0.885	0.99999	0.1		1	18	0	2005	2020
Colorectal Carcinoma	C0009402	STAT3	6774	P40763	signal transducer and activator of transcription 3	Nucleic acid binding	1193	0.32	0.923	1	0.1		0.991	111	0	2005	2020
Colorectal Carcinoma	C0009402	TCF4	6925	P15884	transcription factor 4	Transcription factor	378	0.464	0.846	0.99981	0.1		1	38	0	1999	2019
Colorectal Carcinoma	C0009402	TBX3	6926	O15119	T-box transcription factor 3	Transcription factor	179	0.525	0.769	0.98907	0.1		1	1	3	2013	2013
Colorectal Carcinoma	C0009402	ZEB1	6935	P37275	zinc finger E-box binding homeobox 1	Transcription factor	310	0.442	0.808	0.96665	0.1		1	31	0	2006	2020
Colorectal Carcinoma	C0009402	TERT	7015	O14746	telomerase reverse transcriptase	Enzyme	703	0.374	0.846	0.99046	0.1		1	26	6	2002	2019
Colorectal Carcinoma	C0009402	TFF3	7033	Q07654	trefoil factor 3	Signaling	163	0.518	0.885	0.01591	0.1		0.923	13	0	1997	2019
Colorectal Carcinoma	C0009402	TIMP1	7076	P01033	TIMP metallopeptidase inhibitor 1	Enzyme modulator	603	0.38	0.885	0.4993	0.1		0.957	23	0	1995	2019
Colorectal Carcinoma	C0009402	TIMP2	7077	P16035	TIMP metallopeptidase inhibitor 2	Enzyme modulator	404	0.425	0.846	0.78893	0.1		0.909	11	0	1992	2019
Colorectal Carcinoma	C0009402	TIMP3	7078	P35625	TIMP metallopeptidase inhibitor 3	Enzyme modulator	325	0.445	0.923	0.63037	0.1		1	10	0	2004	2019
Colorectal Carcinoma	C0009402	TOP1	7150	P11387	DNA topoisomerase I	Enzyme	143	0.542	0.692	1	0.1		1	10	1	2000	2019
Colorectal Carcinoma	C0009402	TP73	7161	O15350	tumor protein p73	Transcription factor	300	0.449	0.808	0.99696	0.1		1	19	0	1998	2019
Colorectal Carcinoma	C0009402	TRPC6	7225	Q9Y210	transient receptor potential cation channel subfamily C member 6	Ion channel	166	0.514	0.692	3.0274e-07	0.1		1	1	1	2019	2019
Colorectal Carcinoma	C0009402	TWIST1	7291	Q15672	twist family bHLH transcription factor 1	Transcription factor	559	0.397	0.846	0.34491	0.1		0.913	23	0	2009	2020
Colorectal Carcinoma	C0009402	TXN	7295	P10599	thioredoxin		338	0.447	0.885	0.20119	0.1		1	10	0	1997	2019
Colorectal Carcinoma	C0009402	VDR	7421	P11473	vitamin D receptor	Nuclear receptor	852	0.352	0.885	1.6787e-05	0.1		0.844	64	9	2001	2019
Colorectal Carcinoma	C0009402	VEGFA	7422	P15692	vascular endothelial growth factor A	Signaling	1899	0.266	0.923	2.4085e-05	0.1		0.959	222	8	1995	2020
Colorectal Carcinoma	C0009402	VEGFC	7424	P49767	vascular endothelial growth factor C	Signaling	291	0.459	0.769	0.49565	0.1		1	18	0	2000	2018
Colorectal Carcinoma	C0009402	EZR	7430	P15311	ezrin	Cellular structure	255	0.476	0.808	0.17989	0.1		1	14	0	2009	2019
Colorectal Carcinoma	C0009402	VIM	7431	P08670	vimentin		644	0.372	0.846	0.71255	0.1		1	50	0	2000	2019
Colorectal Carcinoma	C0009402	MYRF	745	Q9Y2G1	myelin regulatory factor		102	0.584	0.731	1	0.1		1	5	2	2014	2019
Colorectal Carcinoma	C0009402	TMEM258	746	P61165	transmembrane protein 258		63	0.644	0.654	0.0018504	0.1		1	5	2	2014	2019
Colorectal Carcinoma	C0009402	WNT5A	7474	P41221	Wnt family member 5A	Signaling	375	0.443	0.808	0.98732	0.1		0.833	12	0	2008	2018
Colorectal Carcinoma	C0009402	XPC	7508	Q01831	XPC complex subunit, DNA damage recognition and repair factor	Nucleic acid binding	211	0.504	0.808	3.6866e-11	0.1		0.933	15	2	2006	2018
Colorectal Carcinoma	C0009402	XRCC3	7517	O43542	X-ray repair cross complementing 3		184	0.505	0.769	1.9134e-10	0.1		0.778	18	3	2003	2019
Colorectal Carcinoma	C0009402	CXCR4	7852	P61073	C-X-C motif chemokine receptor 4	G-protein coupled receptor	739	0.362	0.923	0.017804	0.1		1	49	4	2005	2020
Colorectal Carcinoma	C0009402	REEP5	7905	Q00765	receptor accessory protein 5	Transporter	49	0.633	0.615	0.00069737	0.1		0.9	10	0	2000	2019
Colorectal Carcinoma	C0009402	FSD1	79187	Q9BTV5	fibronectin type III and SPRY domain containing 1		220	0.486	0.808	0.25199	0.1		1	12	0	2012	2019
Colorectal Carcinoma	C0009402	MUL1	79594	Q969V5	mitochondrial E3 ubiquitin protein ligase 1		241	0.473	0.808	1.9108e-06	0.1		1	12	0	2004	2019
Colorectal Carcinoma	C0009402	AIMP2	7965	Q13155	aminoacyl tRNA synthetase complex interacting multifunctional protein 2		555	0.393	0.923	0.008024	0.1		1	13	0	2000	2020
Colorectal Carcinoma	C0009402	BAALC	79870	Q8WXS3	BAALC binder of MAP3K1 and KLF4		47	0.631	0.385	0.0044356	0.1		1	1	1	2018	2018
Colorectal Carcinoma	C0009402	NANOG	79923	Q9H9S0	Nanog homeobox	Transcription factor	140	0.531	0.654	0.72022	0.1		0.923	13	0	2009	2018
Colorectal Carcinoma	C0009402	DHDDS	79947	Q86SQ9	dehydrodolichyl diphosphate synthase subunit	Enzyme	308	0.468	0.885	0.24533	0.1		1	40	0	2000	2019
Colorectal Carcinoma	C0009402	BICC1	80114	Q9H694	BicC family RNA binding protein 1	Transporter	52	0.636	0.577	0.83685	0.1		1	2	1	2014	2016
Colorectal Carcinoma	C0009402	PPP1R2C	80316	O14990	PPP1R2C family member C	Enzyme modulator	231	0.478	0.846		0.1		0.981	54	0	2002	2020
Colorectal Carcinoma	C0009402	KCNIP4	80333	Q6PIL6	potassium voltage-gated channel interacting protein 4	Ion channel	31	0.716	0.385	0.82064	0.1		1	1	1	2017	2017
Colorectal Carcinoma	C0009402	CD276	80381	Q5ZPR3	CD276 molecule	Enzyme modulator	169	0.505	0.731	2.4699e-09	0.1		1	17	0	2010	2020
Colorectal Carcinoma	C0009402	B9D2	80776	Q9BPU9	B9 domain containing 2	Extracellular structure	66	0.606	0.577	5.2557e-05	0.1		1	1	3	2014	2014
Colorectal Carcinoma	C0009402	HMGA2	8091	P52926	high mobility group AT-hook 2	Nucleic acid binding	382	0.429	0.808	0.87015	0.1		1	19	0	2009	2020
Colorectal Carcinoma	C0009402	C1orf21	81563	Q9H246	chromosome 1 open reading frame 21		7	0.89	0.154	0.89204	0.1		1	1	1	2010	2010
Colorectal Carcinoma	C0009402	CABLES2	81928	Q9BTV7	Cdk5 and Abl enzyme substrate 2		10	0.805	0.077	0.00020975	0.1		1	3	1	2014	2019
Colorectal Carcinoma	C0009402	ARHGAP24	83478	Q8N264	Rho GTPase activating protein 24		273	0.456	0.808	3.9495e-10	0.1		1	16	0	1998	2018
Colorectal Carcinoma	C0009402	CASP3	836	P42574	caspase 3	Enzyme	819	0.351	0.923	0.10017	0.1		1	22	0	2007	2019
Colorectal Carcinoma	C0009402	FSD1L	83856	Q9BXM9	fibronectin type III and SPRY domain containing 1 like		216	0.488	0.808	0.23386	0.1		1	12	0	2012	2019
Colorectal Carcinoma	C0009402	TMTC1	83857	Q8IUR5	transmembrane O-mannosyltransferase targeting cadherins 1		21	0.743	0.269	1.329e-09	0.1		1	1	1	2015	2015
Colorectal Carcinoma	C0009402	USHBP1	83878	Q8N6Y0	USH1 protein network component harmonin binding protein 1		21	0.705	0.269	2.9968e-17	0.1		1	1	2	2016	2016
Colorectal Carcinoma	C0009402	REG4	83998	Q9BYZ8	regenerating family member 4		67	0.615	0.385	0.00075276	0.1		1	10	0	2003	2020
Colorectal Carcinoma	C0009402	EFCAB2	84288	Q5VUJ9	EF-hand calcium binding domain 2		10	0.792	0.115	5.9198e-07	0.1		1	1	1	2019	2019
Colorectal Carcinoma	C0009402	ACTRT3	84517	Q9BYD9	actin related protein T3	Cellular structure	12	0.792	0.077	3.7565e-08	0.1		1	1	1	2019	2019
Colorectal Carcinoma	C0009402	CASR	846	P41180	calcium sensing receptor	G-protein coupled receptor	517	0.41	0.846	0.046698	0.1		0.95	20	1	1996	2019
Colorectal Carcinoma	C0009402	SPSB2	84727	Q99619	splA/ryanodine receptor domain and SOCS box containing 2		15	0.76	0.192	0.02137	0.1		1	1	1	2016	2016
Colorectal Carcinoma	C0009402	TUBA1C	84790	Q9BQE3	tubulin alpha 1c	Cellular structure	35	0.663	0.577	0.0074331	0.1		1	1	1	2016	2016
Colorectal Carcinoma	C0009402	TOX2	84969	Q96NM4	TOX high mobility group box family member 2		28	0.736	0.154	0.031987	0.1		1	2	2	2019	2019
Colorectal Carcinoma	C0009402	SLC22A16	85413	Q86VW1	solute carrier family 22 member 16	Transporter	54	0.626	0.5	6.3118e-27	0.1		1	1	1	2018	2018
Colorectal Carcinoma	C0009402	TANC1	85461	Q9C0D5	tetratricopeptide repeat, ankyrin repeat and coiled-coil containing 1		22	0.736	0.115	2.1625e-05	0.1		1	1	1	2019	2019
Colorectal Carcinoma	C0009402	RUNX2	860	Q13950	RUNX family transcription factor 2	Transcription factor	405	0.437	0.846	0.94884	0.1		1	13	0	2002	2020
Colorectal Carcinoma	C0009402	FAM193A	8603	P78312	family with sequence similarity 193 member A		13	0.792	0.192	0.99993	0.1		1	1	1	2017	2017
Colorectal Carcinoma	C0009402	RUNX3	864	Q13761	RUNX family transcription factor 3	Transcription factor	281	0.459	0.731	0.84295	0.1		0.889	36	4	2004	2020
Colorectal Carcinoma	C0009402	TNKS	8658	O95271	tankyrase		88	0.576	0.692	0.011406	0.1		1	13	0	2013	2020
Colorectal Carcinoma	C0009402	BECN1	8678	Q14457	beclin 1	Enzyme modulator	373	0.432	0.846	0.93717	0.1		1	17	0	2010	2019
Colorectal Carcinoma	C0009402	RNGTT	8732	O60942	RNA guanylyltransferase and 5'-phosphatase	Enzyme	32	0.682	0.385	0.37382	0.1		1	1	1	2015	2015
Colorectal Carcinoma	C0009402	CCK	885	P06307	cholecystokinin		326	0.453	0.846	3.3034e-05	0.1		1	24	0	1995	2019
Colorectal Carcinoma	C0009402	NR1I2	8856	O75469	nuclear receptor subfamily 1 group I member 2	Nuclear receptor	462	0.418	0.846	7.2668e-09	0.1		0.818	11	1	2010	2019
Colorectal Carcinoma	C0009402	SPHK1	8877	Q9NYA1	sphingosine kinase 1	Kinase	236	0.48	0.808	3.0327e-07	0.1		1	11	0	2011	2019
Colorectal Carcinoma	C0009402	HERC2	8924	O95714	HECT and RLD domain containing E3 ubiquitin protein ligase 2		143	0.568	0.692	1	0.1		1	1	1	2017	2017
Colorectal Carcinoma	C0009402	MBD2	8932	Q9UBB5	methyl-CpG binding domain protein 2	Epigenetic regulator	256	0.466	0.846	0.34957	0.1		0.917	12	0	1999	2020
Colorectal Carcinoma	C0009402	HSPB3	8988	Q12988	heat shock protein family B (small) member 3		327	0.448	0.769	6.0944e-05	0.1		1	12	0	2007	2020
Colorectal Carcinoma	C0009402	NAT1	9	P18440	N-acetyltransferase 1	Enzyme	133	0.536	0.846	1.9294e-14	0.1		0.688	16	0	1995	2018
Colorectal Carcinoma	C0009402	CLDN1	9076	O95832	claudin 1	Cell-cell junction	234	0.481	0.808	0.0010103	0.1		1	14	0	2001	2019
Colorectal Carcinoma	C0009402	TENM3-AS1	90768		TENM3 antisense RNA 1		12	0.78	0.192		0.1		1	1	1	2014	2014
Colorectal Carcinoma	C0009402	IL33	90865	O95760	interleukin 33		487	0.409	0.885	8.2925e-10	0.1		1	12	2	2015	2019
Colorectal Carcinoma	C0009402	MFSD4B	91749	Q5TF39	major facilitator superfamily domain containing 4B	Transporter	13	0.805	0.269	8.298e-06	0.1		1	1	2	2016	2016
Colorectal Carcinoma	C0009402	PTTG1	9232	O95997	PTTG1 regulator of sister chromatid separation, securin		140	0.526	0.654	0.00042161	0.1		1	10	0	2000	2017
Colorectal Carcinoma	C0009402	KLF4	9314	O43474	Kruppel like factor 4	Nucleic acid binding	307	0.449	0.769	0.99714	0.1		1	25	0	2004	2019
Colorectal Carcinoma	C0009402	ADIPOQ	9370	Q15848	adiponectin, C1Q and collagen domain containing		679	0.376	0.885	4.6434e-09	0.1		0.923	39	5	2008	2019
Colorectal Carcinoma	C0009402	GRAP2	9402	O75791	GRB2 related adaptor protein 2		538	0.394	0.923	0.00015256	0.1		1	13	0	2000	2020
Colorectal Carcinoma	C0009402	NTN1	9423	O95631	netrin 1	Enzyme modulator	209	0.509	0.846	0.99687	0.1		0.929	14	0	2005	2019
Colorectal Carcinoma	C0009402	CD34	947	P28906	CD34 molecule		674	0.368	0.808	4.9881e-06	0.1		0.909	11	0	2004	2018
Colorectal Carcinoma	C0009402	GDF15	9518	Q99988	growth differentiation factor 15	Signaling	389	0.429	0.808	3.0133e-07	0.1		0.923	13	0	2003	2019
Colorectal Carcinoma	C0009402	CLOCK	9575	O15516	clock circadian regulator		309	0.463	0.885	0.99957	0.1		1	19	1	2008	2019
Colorectal Carcinoma	C0009402	CD44	960	P16070	CD44 molecule (Indian blood group)		711	0.363	0.962	2.4476e-07	0.1		0.967	90	2	1993	2020
Colorectal Carcinoma	C0009402	CD68	968	P34810	CD68 molecule	Transporter	452	0.408	0.808	1.4063e-06	0.1		1	12	0	2011	2019
Colorectal Carcinoma	C0009402	KIAA0355	9710	O15063	KIAA0355		11	0.805	0.077	0.97288	0.1		1	1	1	2017	2017
Colorectal Carcinoma	C0009402	CDK1	983	P06493	cyclin dependent kinase 1	Kinase	214	0.482	0.808	0.99206	0.1		1	11	0	1995	2019
Colorectal Carcinoma	C0009402	CDC42	998	P60953	cell division cycle 42	Enzyme modulator	327	0.458	0.846	0.78728	0.1		0.917	12	0	2008	2019
Colorectal Carcinoma	C0009402	SCO2	9997	O43819	synthesis of cytochrome C oxidase 2	Enzyme	294	0.479	0.846	7.5473e-07	0.1		1	27	1	1996	2019
Colorectal Carcinoma	C0009402	CCAT1	100507056		colon cancer associated transcript 1		82	0.585	0.5		0.09		1	9	1	2012	2019
Colorectal Carcinoma	C0009402	CDK2	1017	P24941	cyclin dependent kinase 2	Kinase	270	0.456	0.692	0.61054	0.09		1	9	0	1995	2018
Colorectal Carcinoma	C0009402	PPARGC1A	10891	Q9UBK2	PPARG coactivator 1 alpha	Transcription factor	350	0.453	0.885	0.9973	0.09		1	9	4	2006	2019
Colorectal Carcinoma	C0009402	FSTL1	11167	Q12841	follistatin like 1	Enzyme modulator	128	0.541	0.808	0.89403	0.09		1	9	0	2014	2019
Colorectal Carcinoma	C0009402	FMNL2	114793	Q96PY5	formin like 2		25	0.729	0.231	0.9932	0.09		1	9	0	2008	2019
Colorectal Carcinoma	C0009402	CNR1	1268	P21554	cannabinoid receptor 1	G-protein coupled receptor	393	0.446	0.808	0.50652	0.09		0.889	9	0	2007	2019
Colorectal Carcinoma	C0009402	KLF6	1316	Q99612	Kruppel like factor 6	Nucleic acid binding	204	0.501	0.846	0.97946	0.09		0.889	9	0	2003	2020
Colorectal Carcinoma	C0009402	CREB1	1385	P16220	cAMP responsive element binding protein 1		294	0.463	0.885	0.99673	0.09		1	9	0	2012	2019
Colorectal Carcinoma	C0009402	DNMT3A	1788	Q9Y6K1	DNA methyltransferase 3 alpha		350	0.445	0.846	7.3538e-39	0.09		1	9	0	2009	2019
Colorectal Carcinoma	C0009402	AGT	183	P01019	angiotensinogen	Enzyme modulator	765	0.367	0.923	4.9706e-08	0.09		1	9	1	1998	2020
Colorectal Carcinoma	C0009402	EIF4E	1977	P06730	eukaryotic translation initiation factor 4E	Nucleic acid binding	317	0.448	0.846	0.94133	0.09		1	9	0	2007	2019
Colorectal Carcinoma	C0009402	EPHX1	2052	P07099	epoxide hydrolase 1		196	0.5	0.846	3.2154e-09	0.09		0.889	9	2	2005	2013
Colorectal Carcinoma	C0009402	DKK1	22943	O94907	dickkopf WNT signaling pathway inhibitor 1		372	0.439	0.885	0.17423	0.09		0.889	9	0	2006	2019
Colorectal Carcinoma	C0009402	USP22	23326	Q9UPT9	ubiquitin specific peptidase 22	Enzyme	65	0.61	0.538	0.55212	0.09		1	9	0	2010	2020
Colorectal Carcinoma	C0009402	GH1	2688	P01241	growth hormone 1	Signaling	686	0.373	0.923	0.030057	0.09		1	9	2	2002	2019
Colorectal Carcinoma	C0009402	BBC3	27113	Q96PG8;Q9BXH1	BCL2 binding component 3		157	0.517	0.769	0.0039762	0.09		1	9	0	2001	2019
Colorectal Carcinoma	C0009402	CXCR3	2833	P49682	C-X-C motif chemokine receptor 3	G-protein coupled receptor	367	0.436	0.808	0.181	0.09		1	9	0	2012	2019
Colorectal Carcinoma	C0009402	SETD2	29072	Q9BYW2	SET domain containing 2, histone lysine methyltransferase	Epigenetic regulator	447	0.424	0.846	1	0.09		1	9	0	2010	2019
Colorectal Carcinoma	C0009402	HDAC2	3066	Q92769	histone deacetylase 2	Epigenetic regulator	257	0.476	0.846	0.99997	0.09		1	9	0	2008	2019
Colorectal Carcinoma	C0009402	HLA-G	3135	P17693	major histocompatibility complex, class I, G		279	0.461	0.769	1.365e-11	0.09		1	9	0	1998	2019
Colorectal Carcinoma	C0009402	HMOX1	3162	P09601	heme oxygenase 1		666	0.381	0.923	0.0096817	0.09		0.667	9	1	2011	2019
Colorectal Carcinoma	C0009402	INSR	3643	P06213	insulin receptor	Kinase	452	0.432	0.846	3.6145e-05	0.09		1	9	3	2004	2020
Colorectal Carcinoma	C0009402	CD82	3732	P27701	CD82 molecule		172	0.507	0.731	1.2726e-08	0.09		1	9	0	1999	2018
Colorectal Carcinoma	C0009402	LCN2	3934	P80188	lipocalin 2	Enzyme	497	0.405	0.885	1.1404e-09	0.09		1	9	0	2011	2019
Colorectal Carcinoma	C0009402	LOX	4015	P28300	lysyl oxidase		328	0.447	0.846	0.98769	0.09		1	9	1	2009	2018
Colorectal Carcinoma	C0009402	MIR125A	406910		microRNA 125a		225	0.48	0.769		0.09		1	9	1	2012	2019
Colorectal Carcinoma	C0009402	MIR204	406987		microRNA 204		203	0.487	0.808		0.09		1	9	0	2014	2019
Colorectal Carcinoma	C0009402	MIR215	406997		microRNA 215		96	0.559	0.654		0.09		1	9	0	2012	2020
Colorectal Carcinoma	C0009402	MIR223	407008		microRNA 223		348	0.433	0.808		0.09		1	9	0	2014	2018
Colorectal Carcinoma	C0009402	MIR32	407036		microRNA 32		55	0.619	0.577		0.09		1	9	0	2013	2019
Colorectal Carcinoma	C0009402	ARSA	410	P15289	arylsulfatase A	Enzyme	376	0.448	0.923	1.0893e-11	0.09		1	9	0	2006	2019
Colorectal Carcinoma	C0009402	MMP13	4322	P45452	matrix metallopeptidase 13	Enzyme	328	0.452	0.923	7.8767e-18	0.09		1	9	0	2004	2019
Colorectal Carcinoma	C0009402	MMP14	4323	P50281	matrix metallopeptidase 14	Enzyme	340	0.447	0.769	0.99522	0.09		1	9	0	2000	2020
Colorectal Carcinoma	C0009402	ZFAS1	441951		ZNFX1 antisense RNA 1		82	0.582	0.615		0.09		1	9	0	2016	2020
Colorectal Carcinoma	C0009402	MYB	4602	P10242	MYB proto-oncogene, transcription factor		206	0.49	0.692	0.81924	0.09		1	9	0	2002	2019
Colorectal Carcinoma	C0009402	MYD88	4615	Q99836	MYD88 innate immune signal transduction adaptor	Enzyme modulator	480	0.414	0.923	0.12443	0.09		1	9	1	2013	2020
Colorectal Carcinoma	C0009402	NOS2	4843	P35228	nitric oxide synthase 2		783	0.364	0.923	4.0277e-15	0.09		1	9	0	2002	2019
Colorectal Carcinoma	C0009402	NTS	4922	P30990	neurotensin		184	0.517	0.769	3.8527e-05	0.09		1	9	0	2005	2019
Colorectal Carcinoma	C0009402	MIR378A	494327		microRNA 378a		127	0.532	0.808		0.09		1	9	0	2014	2019
Colorectal Carcinoma	C0009402	PDGFRB	5159	P09619	platelet derived growth factor receptor beta	Kinase	492	0.416	0.846	0.9041	0.09		1	9	1	2008	2019
Colorectal Carcinoma	C0009402	UGT1A6	54578	P19224	UDP glucuronosyltransferase family 1 member A6		115	0.56	0.654	3.0491e-07	0.09		0.889	9	4	2004	2018
Colorectal Carcinoma	C0009402	PROX1	5629	Q92786	prospero homeobox 1	Transcription factor	114	0.565	0.538	0.99884	0.09		0.889	9	0	2008	2019
Colorectal Carcinoma	C0009402	PSMD10	5716	O75832	proteasome 26S subunit, non-ATPase 10		116	0.552	0.808	0.50136	0.09		1	9	0	2010	2019
Colorectal Carcinoma	C0009402	REG1A	5967	P05451	regenerating family member 1 alpha		264	0.467	0.846	1.3499e-05	0.09		1	9	0	2000	2019
Colorectal Carcinoma	C0009402	SNHG6	641638		small nucleolar RNA host gene 6		51	0.633	0.423		0.09		1	9	0	2018	2019
Colorectal Carcinoma	C0009402	GORASP1	64689	Q9BQQ3	golgi reassembly stacking protein 1		369	0.428	0.846	0.019543	0.09		1	9	0	2004	2019
Colorectal Carcinoma	C0009402	NDRG4	65009	Q9ULP0	NDRG family member 4	Enzyme	36	0.67	0.462	0.011627	0.09		1	9	0	2009	2020
Colorectal Carcinoma	C0009402	SKP2	6502	Q13309	S-phase kinase associated protein 2		204	0.492	0.808	0.96042	0.09		1	9	0	2004	2020
Colorectal Carcinoma	C0009402	STAT5A	6776	P42229	signal transducer and activator of transcription 5A	Nucleic acid binding	318	0.445	0.808	0.99994	0.09		1	9	0	2012	2019
Colorectal Carcinoma	C0009402	SULT1A1	6817	P50225	sulfotransferase family 1A member 1		122	0.554	0.769	3.039e-11	0.09		0.778	9	2	2001	2011
Colorectal Carcinoma	C0009402	SYT1	6857	P21579	synaptotagmin 1	Transporter	460	0.412	0.846	0.60038	0.09		1	9	0	2004	2019
Colorectal Carcinoma	C0009402	MIR552	693137		microRNA 552		24	0.705	0.269		0.09		1	9	0	2014	2019
Colorectal Carcinoma	C0009402	PRDX2	7001	P32119	peroxiredoxin 2	Enzyme	243	0.474	0.885	0.086513	0.09		1	9	0	2014	2019
Colorectal Carcinoma	C0009402	THBS1	7057	P07996	thrombospondin 1		480	0.407	0.885	0.99985	0.09		1	9	0	2000	2020
Colorectal Carcinoma	C0009402	UGT1A	7361		UDP glucuronosyltransferase family 1 member A complex locus		117	0.54	0.654		0.09		1	9	0	2009	2015
Colorectal Carcinoma	C0009402	XIST	7503		X inactive specific transcript		146	0.522	0.808		0.09		1	9	0	2007	2019
Colorectal Carcinoma	C0009402	HPP1	780897		hyperpigmentation, progressive, 1		35	0.686	0.346		0.09		1	9	0	2001	2017
Colorectal Carcinoma	C0009402	FZD7	8324	O75084	frizzled class receptor 7	G-protein coupled receptor	70	0.601	0.538	0.08835	0.09		1	9	0	2007	2018
Colorectal Carcinoma	C0009402	HAVCR2	84868	Q8TDQ0	hepatitis A virus cellular receptor 2		299	0.45	0.808	0.03866	0.09		1	9	0	2015	2019
Colorectal Carcinoma	C0009402	CAV1	857	Q03135	caveolin 1	Enzyme modulator	633	0.388	0.885	0.008274	0.09		0.889	9	0	2004	2018
Colorectal Carcinoma	C0009402	UNC5C	8633	O95185	unc-5 netrin receptor C	Receptor	47	0.65	0.462	0.0008813	0.09		1	9	0	2007	2018
Colorectal Carcinoma	C0009402	SOCS1	8651	O15524	suppressor of cytokine signaling 1	Enzyme modulator	315	0.445	0.808	0.58544	0.09		0.889	9	0	2004	2016
Colorectal Carcinoma	C0009402	TNFRSF10B	8795	O14763	TNF receptor superfamily member 10b		179	0.505	0.769	0.00019928	0.09		1	9	0	1998	2019
Colorectal Carcinoma	C0009402	TNFRSF10A	8797	O00220	TNF receptor superfamily member 10a		155	0.521	0.731	5.0697e-15	0.09		1	9	3	2006	2018
Colorectal Carcinoma	C0009402	AIM2	9447	O14862	absent in melanoma 2		167	0.521	0.769	2.1942e-09	0.09		0.889	9	0	2007	2019
Colorectal Carcinoma	C0009402	KLRC4-KLRK1	100528032	P26718	KLRC4-KLRK1 readthrough		246	0.469	0.769		0.08		1	8	0	2008	2019
Colorectal Carcinoma	C0009402	CDH13	1012	P55290	cadherin 13		205	0.501	0.846	0.0007058	0.08		1	8	0	2002	2018
Colorectal Carcinoma	C0009402	AGR2	10551	O95994	anterior gradient 2, protein disulphide isomerase family member	Enzyme	108	0.556	0.692	9.2381e-08	0.08		1	8	0	2012	2019
Colorectal Carcinoma	C0009402	CPOX	1371	P36551	coproporphyrinogen oxidase	Enzyme	246	0.488	0.846	0.17152	0.08		1	8	0	2004	2019
Colorectal Carcinoma	C0009402	CRYZ	1429	Q08257	crystallin zeta		145	0.524	0.731	5.6616e-23	0.08		0.875	8	0	2000	2012
Colorectal Carcinoma	C0009402	CCN2	1490	P29279	cellular communication network factor 2	Signaling	518	0.399	0.846	0.00050202	0.08		1	8	0	2011	2018
Colorectal Carcinoma	C0009402	IL23R	149233	Q5VWK5	interleukin 23 receptor	Signaling	306	0.466	0.769	0.00055961	0.08		0.75	8	2	2011	2016
Colorectal Carcinoma	C0009402	DCN	1634	P07585	decorin		297	0.457	0.808	0.31231	0.08		0.875	8	0	2009	2020
Colorectal Carcinoma	C0009402	DPP4	1803	P27487	dipeptidyl peptidase 4	Enzyme	451	0.42	0.808	7.2797e-09	0.08		1	8	0	2010	2019
Colorectal Carcinoma	C0009402	EPHB3	2049	P54753	EPH receptor B3	Kinase	36	0.682	0.462	0.46242	0.08		1	8	0	2002	2019
Colorectal Carcinoma	C0009402	ERBB4	2066	Q15303	erb-b2 receptor tyrosine kinase 4	Kinase	317	0.455	0.846	0.99912	0.08		1	8	1	2006	2018
Colorectal Carcinoma	C0009402	AKT2	208	P31751	AKT serine/threonine kinase 2	Kinase	264	0.474	0.769	0.64432	0.08		0.875	8	3	2006	2019
Colorectal Carcinoma	C0009402	ALCAM	214	Q13740	activated leukocyte cell adhesion molecule	Cell adhesion	181	0.502	0.808	0.73267	0.08		1	8	0	2007	2018
Colorectal Carcinoma	C0009402	FOXK1	221937	P85037	forkhead box K1		51	0.631	0.462	0.80522	0.08		1	8	0	2015	2018
Colorectal Carcinoma	C0009402	KLRK1	22914	P26718	killer cell lectin like receptor K1		255	0.467	0.769	6.9812e-14	0.08		1	8	0	2008	2019
Colorectal Carcinoma	C0009402	SNHG1	23642		small nucleolar RNA host gene 1		83	0.576	0.692		0.08		1	8	0	2017	2020
Colorectal Carcinoma	C0009402	GC	2638	P02774	GC vitamin D binding protein	Transporter	219	0.489	0.885	2.7301e-11	0.08		0.625	8	4	2010	2019
Colorectal Carcinoma	C0009402	LATS2	26524	Q9NRM7	large tumor suppressor kinase 2	Kinase	106	0.554	0.654	0.98807	0.08		1	8	0	2012	2019
Colorectal Carcinoma	C0009402	DKK4	27121	Q9UBT3	dickkopf WNT signaling pathway inhibitor 4		51	0.647	0.5	0.00076744	0.08		1	8	1	2009	2019
Colorectal Carcinoma	C0009402	ANGPT2	285	O15123	angiopoietin 2	Signaling	457	0.41	0.846	0.83208	0.08		1	8	1	1999	2019
Colorectal Carcinoma	C0009402	ANXA5	308	P08758	annexin A5		283	0.458	0.769	3.7978e-15	0.08		1	8	0	2009	2019
Colorectal Carcinoma	C0009402	TNC	3371	P24821	tenascin C		369	0.433	0.846	1.2592e-07	0.08		0.875	8	0	1995	2019
Colorectal Carcinoma	C0009402	IL13	3596	P35225	interleukin 13		587	0.386	0.846	0.014426	0.08		1	8	3	2006	2019
Colorectal Carcinoma	C0009402	AR	367	P10275	androgen receptor	Nuclear receptor	854	0.351	0.846	0.98837	0.08		1	8	0	1995	2019
Colorectal Carcinoma	C0009402	KCNH2	3757	Q12809	potassium voltage-gated channel subfamily H member 2	Ion channel	189	0.522	0.731	0.99593	0.08		0.875	8	0	2004	2019
Colorectal Carcinoma	C0009402	MIR140	406932		microRNA 140		144	0.522	0.769		0.08		1	8	0	2015	2019
Colorectal Carcinoma	C0009402	MIR144	406936		microRNA 144		175	0.5	0.769		0.08		1	8	0	2011	2019
Colorectal Carcinoma	C0009402	MIR222	407007		microRNA 222		210	0.486	0.808		0.08		1	8	0	2012	2019
Colorectal Carcinoma	C0009402	MIR196B	442920		microRNA 196b		100	0.561	0.731		0.08		1	8	0	2015	2019
Colorectal Carcinoma	C0009402	MSMB	4477	P08118	microseminoprotein beta	Signaling	195	0.498	0.846	0.016199	0.08		1	8	0	2007	2018
Colorectal Carcinoma	C0009402	NF2	4771	P35240	neurofibromin 2		312	0.468	0.885	1	0.08		1	8	0	1994	2019
Colorectal Carcinoma	C0009402	PLA2G4A	5321	P47712	phospholipase A2 group IVA	Enzyme	202	0.496	0.846	5.9817e-05	0.08		1	8	3	1998	2014
Colorectal Carcinoma	C0009402	PLAGL2	5326	Q9UPG8	PLAG1 like zinc finger 2	Transcription factor	29	0.691	0.385	0.98253	0.08		1	8	0	2017	2020
Colorectal Carcinoma	C0009402	TUG1	55000		taurine up-regulated 1		134	0.522	0.769		0.08		1	8	0	2016	2019
Colorectal Carcinoma	C0009402	MEG3	55384		maternally expressed 3		239	0.471	0.846		0.08		1	8	0	2015	2019
Colorectal Carcinoma	C0009402	PRKAA1	5562	Q13131	protein kinase AMP-activated catalytic subunit alpha 1	Kinase	325	0.453	0.846	0.13725	0.08		1	8	0	2014	2020
Colorectal Carcinoma	C0009402	PRKCA	5578	P17252	protein kinase C alpha	Kinase	368	0.44	0.846	0.3677	0.08		1	8	0	1993	2020
Colorectal Carcinoma	C0009402	PDXP	57026	Q96GD0	pyridoxal phosphatase	Enzyme	149	0.533	0.731	0.25559	0.08		1	8	0	2005	2013
Colorectal Carcinoma	C0009402	PXN	5829	P49023	paxillin	Cellular structure	116	0.547	0.654	0.082342	0.08		1	8	0	2004	2019
Colorectal Carcinoma	C0009402	S100A9	6280	P06702	S100 calcium binding protein A9	Calcium-binding protein	363	0.433	0.885	0.4777	0.08		1	8	0	1999	2019
Colorectal Carcinoma	C0009402	CEACAM1	634	P13688	CEA cell adhesion molecule 1		167	0.525	0.731	0.00078816	0.08		1	8	0	2003	2018
Colorectal Carcinoma	C0009402	ST6GAL1	6480	P15907	ST6 beta-galactoside alpha-2,6-sialyltransferase 1		101	0.569	0.731	0.2341	0.08		1	8	0	2005	2019
Colorectal Carcinoma	C0009402	SOX4	6659	Q06945	SRY-box transcription factor 4	Transcription factor	246	0.489	0.808	0.92656	0.08		1	8	0	2009	2019
Colorectal Carcinoma	C0009402	TMSB4X	7114	P62328	thymosin beta 4 X-linked		130	0.541	0.692	0.41205	0.08		1	8	0	2004	2015
Colorectal Carcinoma	C0009402	WNT2	7472	P09544	Wnt family member 2	Signaling	96	0.569	0.615	0.017811	0.08		1	8	0	1996	2019
Colorectal Carcinoma	C0009402	TMPRSS13	84000	Q9BYE2	transmembrane serine protease 13	Enzyme	116	0.545	0.846	1.4759e-08	0.08		1	8	0	2007	2018
Colorectal Carcinoma	C0009402	CCNB1	891	P14635	cyclin B1	Enzyme modulator	155	0.512	0.731	0.15993	0.08		1	8	0	1997	2017
Colorectal Carcinoma	C0009402	MBD4	8930	O95243	methyl-CpG binding domain 4, DNA glycosylase	Enzyme	62	0.61	0.615	1.9706e-14	0.08		0.875	8	0	2000	2019
Colorectal Carcinoma	C0009402	LMLN	89782	Q96KR4	leishmanolysin like peptidase	Enzyme	138	0.528	0.846	1.8746e-14	0.08		1	8	0	2007	2018
Colorectal Carcinoma	C0009402	SOCS3	9021	O14543	suppressor of cytokine signaling 3	Enzyme modulator	375	0.434	0.808	0.74613	0.08		0.875	8	0	2010	2018
Colorectal Carcinoma	C0009402	CLDN2	9075	P57739	claudin 2	Cell-cell junction	97	0.575	0.692	0.70328	0.08		0.875	8	0	2006	2019
Colorectal Carcinoma	C0009402	MTA1	9112	Q13330	metastasis associated 1	Nucleic acid binding	118	0.547	0.692	1	0.08		0.875	8	0	2003	2017
Colorectal Carcinoma	C0009402	CD163	9332	Q86VB7	CD163 molecule	Enzyme	369	0.427	0.846	0.0008338	0.08		1	8	0	2012	2019
Colorectal Carcinoma	C0009402	SLC9A3R1	9368	O14745	SLC9A3 regulator 1		116	0.547	0.577	8.8416e-05	0.08		1	8	0	2010	2018
Colorectal Carcinoma	C0009402	COX5A	9377	P20674	cytochrome c oxidase subunit 5A	Enzyme	171	0.515	0.846	0.49407	0.08		1	8	0	2004	2019
Colorectal Carcinoma	C0009402	HDAC9	9734	Q9UKV0	histone deacetylase 9	Epigenetic regulator	340	0.439	0.846	0.99973	0.08		1	8	0	2009	2018
Colorectal Carcinoma	C0009402	KEAP1	9817	Q14145	kelch like ECH associated protein 1		251	0.475	0.808	0.00038766	0.08		1	8	2	2012	2020
Colorectal Carcinoma	C0009402	MIR760	100126348		microRNA 760		37	0.674	0.385		0.07		1	7	0	2012	2019
Colorectal Carcinoma	C0009402	CDKN2B	1030	P42772	cyclin dependent kinase inhibitor 2B		440	0.417	0.769	0.0073369	0.07		1	7	0	2001	2017
Colorectal Carcinoma	C0009402	AKR1A1	10327	P14550	aldo-keto reductase family 1 member A1	Enzyme	185	0.51	0.846	6.6621e-07	0.07		1	7	0	2001	2013
Colorectal Carcinoma	C0009402	OLFM4	10562	Q6UX06	olfactomedin 4	Cellular structure	89	0.576	0.615	2.7754e-06	0.07		1	7	0	2011	2018
Colorectal Carcinoma	C0009402	SUB1	10923	P53999	SUB1 regulator of transcription		260	0.465	0.846	0.89245	0.07		1	7	0	2001	2017
Colorectal Carcinoma	C0009402	KCNQ1OT1	10984		KCNQ1 opposite strand/antisense transcript 1		159	0.534	0.731		0.07		0.857	7	0	2001	2019
Colorectal Carcinoma	C0009402	COPS5	10987	Q92905	COP9 signalosome subunit 5	Enzyme	101	0.566	0.769	0.99925	0.07		1	7	0	2012	2019
Colorectal Carcinoma	C0009402	NLRP3	114548	Q96P20	NLR family pyrin domain containing 3		805	0.361	0.962	0.00081103	0.07		1	7	1	2012	2020
Colorectal Carcinoma	C0009402	LRG1	116844	P02750	leucine rich alpha-2-glycoprotein 1		109	0.564	0.731	0.095143	0.07		1	7	0	2016	2020
Colorectal Carcinoma	C0009402	CCR6	1235	P51684	C-C motif chemokine receptor 6	G-protein coupled receptor	231	0.485	0.808	0.0057867	0.07		1	7	0	2006	2018
Colorectal Carcinoma	C0009402	CYP2B6	1555	P20813	cytochrome P450 family 2 subfamily B member 6		388	0.428	0.846	1.9303e-10	0.07		1	7	0	2002	2018
Colorectal Carcinoma	C0009402	EGR1	1958	P18146	early growth response 1	Nucleic acid binding	378	0.433	0.923	0.3509	0.07		1	7	0	2011	2018
Colorectal Carcinoma	C0009402	FGFR1	2260	P11362	fibroblast growth factor receptor 1	Kinase	816	0.362	0.885	0.99984	0.07		1	7	0	2009	2020
Colorectal Carcinoma	C0009402	ALOX5	240	P09917	arachidonate 5-lipoxygenase	Enzyme	342	0.447	0.885	1.2059e-06	0.07		1	7	0	2000	2019
Colorectal Carcinoma	C0009402	XRCC6	2547	P12956	X-ray repair cross complementing 6	Enzyme	119	0.552	0.769	0.99904	0.07		1	7	1	2004	2016
Colorectal Carcinoma	C0009402	GATA6	2627	Q92908	GATA binding protein 6		259	0.478	0.808	0.99709	0.07		1	7	0	2003	2019
Colorectal Carcinoma	C0009402	ANG	283	P03950	angiogenin		185	0.511	0.769	0.28738	0.07		1	7	0	2000	2019
Colorectal Carcinoma	C0009402	GSTA1	2938	P08263	glutathione S-transferase alpha 1		108	0.561	0.731	1.7305e-06	0.07		1	7	1	2002	2019
Colorectal Carcinoma	C0009402	H2AX	3014	P16104	H2A.X variant histone	Nucleic acid binding	212	0.484	0.808	0.17652	0.07		1	7	0	2012	2019
Colorectal Carcinoma	C0009402	HDAC1	3065	Q13547	histone deacetylase 1	Epigenetic regulator	277	0.46	0.846	0.61427	0.07		1	7	0	2007	2019
Colorectal Carcinoma	C0009402	HMGA1	3159	P17096	high mobility group AT-hook 1	Nucleic acid binding	206	0.494	0.769	0.83209	0.07		1	7	0	2011	2019
Colorectal Carcinoma	C0009402	BIRC3	330	Q13489	baculoviral IAP repeat containing 3	Enzyme modulator	209	0.491	0.769	0.065597	0.07		0.857	7	0	2009	2019
Colorectal Carcinoma	C0009402	CCN1	3491	O00622	cellular communication network factor 1	Signaling	246	0.473	0.731	0.71388	0.07		1	7	0	2010	2019
Colorectal Carcinoma	C0009402	FAS	355	P25445	Fas cell surface death receptor		754	0.372	0.923	0.8117	0.07		1	7	2	2000	2018
Colorectal Carcinoma	C0009402	CXCR2	3579	P25025	C-X-C motif chemokine receptor 2	G-protein coupled receptor	335	0.445	0.923	0.013736	0.07		1	7	0	2012	2019
Colorectal Carcinoma	C0009402	IL18	3606	Q14116	interleukin 18		750	0.365	0.923	0.030717	0.07		1	7	0	2008	2019
Colorectal Carcinoma	C0009402	AQP5	362	P55064	aquaporin 5	Ion channel	119	0.552	0.769	0.053249	0.07		1	7	0	2012	2019
Colorectal Carcinoma	C0009402	CXCL10	3627	P02778	C-X-C motif chemokine ligand 10	Signaling	631	0.378	0.885	0.36865	0.07		0.857	7	0	1997	2018
Colorectal Carcinoma	C0009402	ITGA5	3678	P08648	integrin subunit alpha 5		145	0.524	0.769	0.42455	0.07		1	7	0	2001	2019
Colorectal Carcinoma	C0009402	KPNA2	3838	P52292	karyopherin subunit alpha 2	Transporter	79	0.588	0.654	0.54133	0.07		1	7	0	2015	2019
Colorectal Carcinoma	C0009402	KRT19	3880	P08727	keratin 19		270	0.46	0.731	0.0043426	0.07		0.857	7	0	2001	2014
Colorectal Carcinoma	C0009402	LDLR	3949	P01130	low density lipoprotein receptor		336	0.449	0.885	9.841e-24	0.07		1	7	0	1996	2019
Colorectal Carcinoma	C0009402	LGALS4	3960	P56470	galectin 4	Signaling	73	0.599	0.731	2.7538e-07	0.07		1	7	2	1997	2017
Colorectal Carcinoma	C0009402	MIR10B	406903		microRNA 10b		167	0.509	0.808		0.07		1	7	0	2012	2019
Colorectal Carcinoma	C0009402	MIR142	406934		microRNA 142		220	0.48	0.846		0.07		1	7	0	2014	2019
Colorectal Carcinoma	C0009402	MIR15A	406948		microRNA 15a		221	0.482	0.808		0.07		0.857	7	0	2013	2019
Colorectal Carcinoma	C0009402	MIR19A	406979		microRNA 19a		151	0.512	0.808		0.07		1	7	0	2013	2019
Colorectal Carcinoma	C0009402	MIR22	407004		microRNA 22		195	0.496	0.808		0.07		1	7	0	2012	2019
Colorectal Carcinoma	C0009402	MIR320A	407037		microRNA 320a		145	0.526	0.808		0.07		1	7	0	2012	2019
Colorectal Carcinoma	C0009402	MIR96	407053		microRNA 96		134	0.536	0.769		0.07		1	7	0	2015	2019
Colorectal Carcinoma	C0009402	MRE11	4361	P49959	MRE11 homolog, double strand break repair nuclease		171	0.527	0.808	1.264e-12	0.07		1	7	1	2002	2019
Colorectal Carcinoma	C0009402	NUDT1	4521	P36639	nudix hydrolase 1	Enzyme	73	0.597	0.769	7.4464e-12	0.07		0.857	7	1	2007	2019
Colorectal Carcinoma	C0009402	MYCN	4613	P04198	MYCN proto-oncogene, bHLH transcription factor	Transcription factor	314	0.454	0.808	0.88897	0.07		1	7	0	2009	2017
Colorectal Carcinoma	C0009402	ATF3	467	P18847	activating transcription factor 3	Transcription factor	228	0.494	0.885	0.089296	0.07		1	7	0	2012	2018
Colorectal Carcinoma	C0009402	NOS3	4846	P29474	nitric oxide synthase 3		706	0.378	0.885	6.7246e-07	0.07		0.857	7	1	2006	2018
Colorectal Carcinoma	C0009402	PEBP1	5037	P30086	phosphatidylethanolamine binding protein 1	Enzyme modulator	181	0.5	0.808	0.09167	0.07		0.857	7	0	2006	2016
Colorectal Carcinoma	C0009402	PECAM1	5175	P16284	platelet and endothelial cell adhesion molecule 1	Cell adhesion	396	0.426	0.846		0.07		1	7	0	2013	2019
Colorectal Carcinoma	C0009402	PITX1	5307	P78337	paired like homeodomain 1		109	0.561	0.654	0.88244	0.07		1	7	0	2012	2019
Colorectal Carcinoma	C0009402	ANO1	55107	Q5XXA6	anoctamin 1	Ion channel	175	0.516	0.769	0.87426	0.07		0.714	7	0	2013	2019
Colorectal Carcinoma	C0009402	PTPA	5524	Q15257	protein phosphatase 2 phosphatase activator	Enzyme modulator	245	0.48	0.846	0.99057	0.07		1	7	0	2004	2018
Colorectal Carcinoma	C0009402	RETN	56729	Q9HD89	resistin		302	0.454	0.808	0.036545	0.07		0.857	7	1	2008	2019
Colorectal Carcinoma	C0009402	CEMIP	57214	Q8WUJ3	cell migration inducing hyaluronidase 1		64	0.617	0.615	4.4023e-17	0.07		1	7	0	2017	2019
Colorectal Carcinoma	C0009402	MIR499A	574501		microRNA 499a		156	0.519	0.846		0.07		1	7	1	2013	2018
Colorectal Carcinoma	C0009402	CIP2A	57650	Q8TCG1	cellular inhibitor of PP2A		141	0.524	0.808	1.3591e-13	0.07		1	7	0	2012	2019
Colorectal Carcinoma	C0009402	ROBO1	6091	Q9Y6N7	roundabout guidance receptor 1		144	0.535	0.731	7.2696e-16	0.07		0.857	7	0	2006	2019
Colorectal Carcinoma	C0009402	ROCK1	6093	Q13464	Rho associated coiled-coil containing protein kinase 1	Kinase	157	0.513	0.731	1	0.07		1	7	2	2013	2018
Colorectal Carcinoma	C0009402	MIR486-1	619554		microRNA 486-1		142	0.521	0.808		0.07		1	7	0	2016	2019
Colorectal Carcinoma	C0009402	SCD	6319	O00767	stearoyl-CoA desaturase		225	0.49	0.808	0.96968	0.07		1	7	1	2016	2020
Colorectal Carcinoma	C0009402	CCL5	6352	P13501	C-C motif chemokine ligand 5	Signaling	514	0.403	0.885	0.0017516	0.07		0.857	7	0	2011	2019
Colorectal Carcinoma	C0009402	CCL21	6366	O00585	C-C motif chemokine ligand 21	Signaling	186	0.502	0.769	0.036239	0.07		1	7	0	2006	2020
Colorectal Carcinoma	C0009402	SDC2	6383	P34741	syndecan 2	Extracellular structure	120	0.536	0.808	0.4049	0.07		1	7	0	2001	2020
Colorectal Carcinoma	C0009402	SELE	6401	P16581	selectin E		327	0.447	0.808	7.9058e-10	0.07		1	7	2	1998	2019
Colorectal Carcinoma	C0009402	SIX1	6495	Q15475	SIX homeobox 1	Transcription factor	200	0.496	0.692	0.65297	0.07		1	7	0	2012	2019
Colorectal Carcinoma	C0009402	BMP3	651	P12645	bone morphogenetic protein 3	Signaling	32	0.678	0.423	0.056398	0.07		1	7	0	2007	2020
Colorectal Carcinoma	C0009402	SMARCA4	6597	P51532	SWI/SNF related, matrix associated, actin dependent regulator of chromatin, subfamily a, member 4	Epigenetic regulator	347	0.45	0.885	1	0.07		1	7	0	2011	2019
Colorectal Carcinoma	C0009402	BNIP3	664	Q12983	BCL2 interacting protein 3		158	0.52	0.731	1.9687e-05	0.07		1	7	0	2008	2018
Colorectal Carcinoma	C0009402	TRIM21	6737	P19474	tripartite motif containing 21		229	0.485	0.808	3.3549e-09	0.07		0.857	7	0	2013	2019
Colorectal Carcinoma	C0009402	ST13	6767	P50502	ST13 Hsp70 interacting protein		81	0.584	0.692	0.66074	0.07		1	7	0	1999	2012
Colorectal Carcinoma	C0009402	STAT5B	6777	P51692	signal transducer and activator of transcription 5B	Nucleic acid binding	357	0.442	0.808	0.99988	0.07		1	7	0	2012	2019
Colorectal Carcinoma	C0009402	ADAM17	6868	P78536	ADAM metallopeptidase domain 17		316	0.453	0.808	0.99528	0.07		1	7	0	2011	2017
Colorectal Carcinoma	C0009402	TAZ	6901	Q16635	tafazzin	Enzyme	252	0.477	0.808	0.72591	0.07		1	7	0	2013	2019
Colorectal Carcinoma	C0009402	NR1H2	7376	P55055	nuclear receptor subfamily 1 group H member 2	Nuclear receptor	134	0.533	0.769	0.37506	0.07		1	7	0	2006	2019
Colorectal Carcinoma	C0009402	UVRAG	7405	Q9P2Y5	UV radiation resistance associated		336	0.436	0.769	0.98942	0.07		1	7	0	2006	2019
Colorectal Carcinoma	C0009402	TET1	80312	Q8NFU7	tet methylcytosine dioxygenase 1		156	0.523	0.808	1	0.07		1	7	0	2012	2019
Colorectal Carcinoma	C0009402	SMC1A	8243	Q14683	structural maintenance of chromosomes 1A		251	0.509	0.808	1	0.07		1	7	0	2010	2019
Colorectal Carcinoma	C0009402	AXIN1	8312	O15169	axin 1		118	0.559	0.577	0.40765	0.07		1	7	1	2003	2019
Colorectal Carcinoma	C0009402	SPOP	8405	O43791	speckle type BTB/POZ protein		72	0.597	0.5	0.99922	0.07		1	7	0	2013	2020
Colorectal Carcinoma	C0009402	AFAP1-AS1	84740		AFAP1 antisense RNA 1		80	0.573	0.538		0.07		1	7	0	2016	2019
Colorectal Carcinoma	C0009402	PIK3R3	8503	Q92569	phosphoinositide-3-kinase regulatory subunit 3	Enzyme modulator	101	0.556	0.692	3.3583e-10	0.07		1	7	0	2013	2018
Colorectal Carcinoma	C0009402	IRS2	8660	Q9Y4H2	insulin receptor substrate 2		152	0.535	0.654	0.99032	0.07		1	7	2	2004	2017
Colorectal Carcinoma	C0009402	SQSTM1	8878	Q13501	sequestosome 1		470	0.428	0.885	0.00086035	0.07		1	7	0	1990	2019
Colorectal Carcinoma	C0009402	ACVR2A	92	P27037	activin A receptor type 2A	Kinase	62	0.636	0.615	0.99972	0.07		1	7	0	2004	2020
Colorectal Carcinoma	C0009402	SLIT2	9353	O94813	slit guidance ligand 2		177	0.511	0.769	1	0.07		1	7	0	2003	2019
Colorectal Carcinoma	C0009402	FOXQ1	94234	Q9C009	forkhead box Q1	Transcription factor	67	0.61	0.615	0.61849	0.07		1	7	0	2010	2017
Colorectal Carcinoma	C0009402	RAD50	10111	Q92878	RAD50 double strand break repair protein		110	0.556	0.808	3.4392e-27	0.06		1	6	0	2001	2019
Colorectal Carcinoma	C0009402	PANDAR	101154753		promoter of CDKN1A antisense DNA damage activated RNA		51	0.623	0.577		0.06		1	6	0	2017	2019
Colorectal Carcinoma	C0009402	CDKN1C	1028	P49918	cyclin dependent kinase inhibitor 1C		298	0.456	0.846	0.81963	0.06		0.833	6	0	2001	2018
Colorectal Carcinoma	C0009402	KHDRBS1	10657	Q07666	KH RNA binding domain containing, signal transduction associated 1	Nucleic acid binding	289	0.457	0.846	0.99423	0.06		1	6	0	1990	2019
Colorectal Carcinoma	C0009402	PPP1R13L	10848	Q8WUF5	protein phosphatase 1 regulatory subunit 13 like		122	0.539	0.692	0.03206	0.06		0.833	6	0	2006	2018
Colorectal Carcinoma	C0009402	UBE2C	11065	O00762	ubiquitin conjugating enzyme E2 C		105	0.558	0.615	0.10513	0.06		1	6	0	2010	2016
Colorectal Carcinoma	C0009402	ANXA10	11199	Q9UJ72	annexin A10		63	0.621	0.462	9.5506e-14	0.06		1	6	0	2012	2015
Colorectal Carcinoma	C0009402	PRRT2	112476	Q7Z6L0	proline rich transmembrane protein 2		353	0.448	0.808	0.57919	0.06		1	6	0	1993	2020
Colorectal Carcinoma	C0009402	CLCA1	1179	A8K7I4	chloride channel accessory 1	Ion channel	42	0.659	0.538	3.2791e-09	0.06		1	6	0	2001	2019
Colorectal Carcinoma	C0009402	ADH1C	126	P00326	alcohol dehydrogenase 1C (class I), gamma polypeptide	Enzyme	146	0.547	0.731		0.06		0.833	6	0	2006	2018
Colorectal Carcinoma	C0009402	CST1	1469	P01037	cystatin SN		39	0.659	0.577	3.3855e-08	0.06		1	6	0	2009	2018
Colorectal Carcinoma	C0009402	CTSB	1508	P07858	cathepsin B	Enzyme	304	0.457	0.846	5.8819e-11	0.06		1	6	0	1998	2019
Colorectal Carcinoma	C0009402	CYP19A1	1588	P11511	cytochrome P450 family 19 subfamily A member 1	Enzyme	519	0.41	0.885	1.7022e-05	0.06		0.833	6	6	2007	2018
Colorectal Carcinoma	C0009402	DDX3X	1654	O00571	DEAD-box helicase 3 X-linked		180	0.537	0.769	0.99986	0.06		1	6	0	2015	2019
Colorectal Carcinoma	C0009402	ELAVL2	1993	Q12926	ELAV like RNA binding protein 2		199	0.486	0.808	0.99514	0.06		1	6	0	2017	2020
Colorectal Carcinoma	C0009402	ERCC4	2072	Q92889	ERCC excision repair 4, endonuclease catalytic subunit	Enzyme	325	0.468	0.846	1.3758e-12	0.06		1	6	4	2013	2019
Colorectal Carcinoma	C0009402	ETV4	2118	P43268	ETS variant transcription factor 4	Transcription factor	120	0.545	0.5	2.8688e-08	0.06		0.833	6	0	2003	2018
Colorectal Carcinoma	C0009402	F2RL1	2150	P55085	F2R like trypsin receptor 1	G-protein coupled receptor	256	0.48	0.769	0.00014843	0.06		1	6	0	2013	2020
Colorectal Carcinoma	C0009402	FCGR3B	2215	O75015	Fc fragment of IgG receptor IIIb	Cell adhesion	291	0.452	0.962	3.0294e-07	0.06		1	6	0	2016	2020
Colorectal Carcinoma	C0009402	KDM1A	23028	O60341	lysine demethylase 1A	Epigenetic regulator	185	0.512	0.808	0.99667	0.06		1	6	0	2013	2020
Colorectal Carcinoma	C0009402	BRD4	23476	O60885	bromodomain containing 4	Epigenetic regulator	335	0.446	0.885	1	0.06		1	6	0	2015	2019
Colorectal Carcinoma	C0009402	TMEFF2	23671	Q9UIK5	transmembrane protein with EGF like and two follistatin like domains 2	Enzyme modulator	63	0.619	0.5	7.3885e-05	0.06		1	6	0	2005	2019
Colorectal Carcinoma	C0009402	FTH1	2495	P02794	ferritin heavy chain 1	Storage	107	0.559	0.731	0.13999	0.06		1	6	0	2010	2019
Colorectal Carcinoma	C0009402	CASC2	255082		cancer susceptibility 2		64	0.612	0.462		0.06		1	6	0	2015	2019
Colorectal Carcinoma	C0009402	GLS	2744	O94925	glutaminase	Enzyme	217	0.489	0.808	0.96154	0.06		1	6	0	2015	2019
Colorectal Carcinoma	C0009402	GRN	2896	P28799	granulin precursor		412	0.435	0.846	0.069666	0.06		1	6	1	2017	2020
Colorectal Carcinoma	C0009402	UHRF1	29128	Q96T88	ubiquitin like with PHD and ring finger domains 1		125	0.54	0.692		0.06		1	6	0	2012	2019
Colorectal Carcinoma	C0009402	APAF1	317	O14727	apoptotic peptidase activating factor 1		145	0.525	0.769	9.6242e-06	0.06		1	6	0	2004	2017
Colorectal Carcinoma	C0009402	HNRNPA1	3178	P09651	heterogeneous nuclear ribonucleoprotein A1		188	0.529	0.885	0.99911	0.06		1	6	0	2005	2019
Colorectal Carcinoma	C0009402	HSF1	3297	Q00613	heat shock transcription factor 1	Transcription factor	185	0.507	0.769	0.74762	0.06		1	6	0	2004	2018
Colorectal Carcinoma	C0009402	HTC2	3342		hypertrichosis 2 (generalized, congenital)		511	0.392	0.808		0.06		1	6	0	2007	2018
Colorectal Carcinoma	C0009402	APOA1	335	P02647	apolipoprotein A1		416	0.429	0.885	0.00054909	0.06		1	6	0	2017	2019
Colorectal Carcinoma	C0009402	IFNAR1	3454	P17181	interferon alpha and beta receptor subunit 1	Receptor	142	0.532	0.769	3.2501e-12	0.06		1	6	0	2011	2019
Colorectal Carcinoma	C0009402	IL1RN	3557	P18510	interleukin 1 receptor antagonist		701	0.373	0.923	0.030914	0.06		1	6	1	2005	2019
Colorectal Carcinoma	C0009402	ILK	3611	Q13418	integrin linked kinase	Kinase	192	0.503	0.769	3.7887e-05	0.06		1	6	0	2007	2018
Colorectal Carcinoma	C0009402	IDO1	3620	P14902	indoleamine 2,3-dioxygenase 1		295	0.454	0.846	3.3013e-06	0.06		1	6	0	2018	2019
Colorectal Carcinoma	C0009402	ITGB3	3690	P05106	integrin subunit beta 3	Receptor	260	0.485	0.846	0.0017189	0.06		0.833	6	4	2001	2019
Colorectal Carcinoma	C0009402	LAG3	3902	P18627	lymphocyte activating 3	Receptor	154	0.517	0.692	0.27623	0.06		1	6	0	2018	2019
Colorectal Carcinoma	C0009402	STMN1	3925	P16949	stathmin 1		284	0.458	0.885	0.075244	0.06		0.833	6	0	2010	2019
Colorectal Carcinoma	C0009402	LASP1	3927	Q14847	LIM and SH3 protein 1		85	0.572	0.615	0.9827	0.06		1	6	0	2010	2018
Colorectal Carcinoma	C0009402	LEPR	3953	P48357	leptin receptor	Signaling	416	0.433	0.808	0.99475	0.06		1	6	1	2007	2019
Colorectal Carcinoma	C0009402	MIRLET7B	406884		microRNA let-7b		186	0.493	0.769		0.06		0.833	6	0	2015	2018
Colorectal Carcinoma	C0009402	MIR185	406961		microRNA 185		106	0.551	0.808		0.06		0.833	6	0	2011	2020
Colorectal Carcinoma	C0009402	MIR210	406992		microRNA 210		277	0.46	0.846		0.06		1	6	0	2012	2017
Colorectal Carcinoma	C0009402	TACSTD2	4070	P09758	tumor associated calcium signal transducer 2		130	0.537	0.731	0.0046571	0.06		1	6	0	2001	2015
Colorectal Carcinoma	C0009402	MIR27B	407019		microRNA 27b		141	0.529	0.769		0.06		1	6	0	2013	2019
Colorectal Carcinoma	C0009402	MIR34C	407042		microRNA 34c		131	0.541	0.885		0.06		0.833	6	1	2008	2018
Colorectal Carcinoma	C0009402	MME	4311	P08473	membrane metalloendopeptidase	Enzyme	470	0.407	0.808	1.465e-18	0.06		1	6	0	2007	2019
Colorectal Carcinoma	C0009402	XRCC6P5	442459		X-ray repair cross complementing 6 pseudogene 5		84	0.579	0.769		0.06		1	6	0	2015	2019
Colorectal Carcinoma	C0009402	MST1R	4486	Q04912	macrophage stimulating 1 receptor	Kinase	133	0.542	0.808	7.8684e-37	0.06		1	6	0	2000	2019
Colorectal Carcinoma	C0009402	MUC4	4585	Q99102	mucin 4, cell surface associated		183	0.506	0.769	2.7904e-54	0.06		1	6	0	1999	2019
Colorectal Carcinoma	C0009402	NBN	4683	O60934	nibrin	Nucleic acid binding	291	0.467	0.808	2.1838e-16	0.06		1	6	3	2000	2016
Colorectal Carcinoma	C0009402	NEDD9	4739	Q14511	neural precursor cell expressed, developmentally down-regulated 9		113	0.548	0.769	0.12634	0.06		1	6	0	2010	2019
Colorectal Carcinoma	C0009402	NOTCH2	4853	Q04721	notch receptor 2		384	0.441	0.808	1	0.06		1	6	0	2007	2019
Colorectal Carcinoma	C0009402	MIR382	494331		microRNA 382		71	0.603	0.692		0.06		1	6	0	2016	2020
Colorectal Carcinoma	C0009402	REG3A	5068	Q06141	regenerating family member 3 alpha		148	0.522	0.769	0.00062895	0.06		1	6	0	1999	2016
Colorectal Carcinoma	C0009402	PLCE1	51196	Q9P212	phospholipase C epsilon 1	Enzyme	114	0.572	0.654	5.6754e-11	0.06		0.833	6	6	2011	2016
Colorectal Carcinoma	C0009402	PGR	5241	P06401	progesterone receptor	Nuclear receptor	392	0.426	0.885	0.051042	0.06		1	6	0	2010	2019
Colorectal Carcinoma	C0009402	PLG	5340	P00747	plasminogen	Enzyme	586	0.389	0.923	0.010345	0.06		1	6	0	1994	2018
Colorectal Carcinoma	C0009402	PMS1	5378	P54277	PMS1 homolog 1, mismatch repair system component	Nucleic acid binding	115	0.569	0.654	1.3178e-17	0.06		1	6	0	1995	2018
Colorectal Carcinoma	C0009402	PPARA	5465	Q07869	peroxisome proliferator activated receptor alpha	Nuclear receptor	408	0.432	0.885	0.030182	0.06		1	6	0	2004	2019
Colorectal Carcinoma	C0009402	CYP2W1	54905	Q8TAV3	cytochrome P450 family 2 subfamily W member 1		19	0.736	0.231	2.2124e-07	0.06		0.833	6	2	2010	2017
Colorectal Carcinoma	C0009402	PRKAA2	5563	P54646	protein kinase AMP-activated catalytic subunit alpha 2	Kinase	317	0.456	0.846	3.5282e-08	0.06		1	6	0	2014	2019
Colorectal Carcinoma	C0009402	PRKAB1	5564	Q9Y478	protein kinase AMP-activated non-catalytic subunit beta 1	Kinase	296	0.46	0.846	0.0052573	0.06		1	6	0	2014	2019
Colorectal Carcinoma	C0009402	CHFR	55743	Q96EP1	checkpoint with forkhead and ring finger domains	Enzyme	56	0.633	0.5	0.00078671	0.06		1	6	1	2007	2018
Colorectal Carcinoma	C0009402	PRKDC	5591	P78527	protein kinase, DNA-activated, catalytic subunit	Kinase	131	0.54	0.808	1	0.06		1	6	0	2004	2019
Colorectal Carcinoma	C0009402	KLK6	5653	Q92876	kallikrein related peptidase 6	Enzyme	99	0.575	0.654	0.0060052	0.06		1	6	0	2005	2019
Colorectal Carcinoma	C0009402	B2M	567	P61769	beta-2-microglobulin	Immune response	352	0.447	0.846	0.56167	0.06		1	6	0	2008	2019
Colorectal Carcinoma	C0009402	PTCH1	5727	Q13635	patched 1		604	0.398	0.885	1	0.06		0.833	6	0	2008	2014
Colorectal Carcinoma	C0009402	PTK2	5747	Q05397	protein tyrosine kinase 2	Kinase	205	0.497	0.808	0.99987	0.06		1	6	0	2010	2020
Colorectal Carcinoma	C0009402	BCAT1	586	P54687	branched chain amino acid transaminase 1	Enzyme	62	0.606	0.538	3.7984e-08	0.06		1	6	0	2006	2018
Colorectal Carcinoma	C0009402	RARRES2	5919	Q99969	retinoic acid receptor responder 2		180	0.519	0.731	2.716e-05	0.06		0.833	6	0	2016	2019
Colorectal Carcinoma	C0009402	RNASE3	6037	P12724	ribonuclease A family member 3		207	0.49	0.808		0.06		1	6	0	1996	2017
Colorectal Carcinoma	C0009402	BCL9	607	O00512	BCL9 transcription coactivator		74	0.595	0.615	0.49607	0.06		1	6	0	2008	2019
Colorectal Carcinoma	C0009402	MIR455	619556		microRNA 455		92	0.559	0.769		0.06		1	6	0	2015	2019
Colorectal Carcinoma	C0009402	BDNF	627	P23560	brain derived neurotrophic factor	Signaling	992	0.345	0.923	0.65626	0.06		1	6	0	2010	2019
Colorectal Carcinoma	C0009402	SDC1	6382	P18827	syndecan 1	Extracellular structure	323	0.445	0.769	0.0084118	0.06		1	6	0	2001	2019
Colorectal Carcinoma	C0009402	GOLPH3	64083	Q9H4A6	golgi phosphoprotein 3		140	0.53	0.808	0.23586	0.06		1	6	0	2002	2020
Colorectal Carcinoma	C0009402	BLM	641	P54132	BLM RecQ like helicase		158	0.535	0.808	1.5376e-15	0.06		1	6	2	2003	2017
Colorectal Carcinoma	C0009402	SET	6418	Q01105	SET nuclear proto-oncogene	Enzyme modulator	183	0.507	0.808	0.99597	0.06		1	6	0	2014	2020
Colorectal Carcinoma	C0009402	SGK1	6446	O00141	serum/glucocorticoid regulated kinase 1	Kinase	188	0.506	0.769	0.0023046	0.06		1	6	0	2010	2019
Colorectal Carcinoma	C0009402	SNAI2	6591	O43623	snail family transcriptional repressor 2		189	0.505	0.692	0.79531	0.06		1	6	0	2014	2020
Colorectal Carcinoma	C0009402	HLTF	6596	Q14527	helicase like transcription factor		70	0.606	0.5	1.8724e-28	0.06		1	6	0	2003	2019
Colorectal Carcinoma	C0009402	SOAT1	6646	P35610	sterol O-acyltransferase 1	Enzyme	389	0.424	0.846	7.3621e-10	0.06		1	6	0	2013	2019
Colorectal Carcinoma	C0009402	SOD1	6647	P00441	superoxide dismutase 1	Enzyme	689	0.379	0.962	0.1773	0.06		1	6	1	2009	2020
Colorectal Carcinoma	C0009402	BSG	682	P35613	basigin (Ok blood group)		287	0.458	0.769	2.5873e-05	0.06		1	6	0	2011	2018
Colorectal Carcinoma	C0009402	TAGLN	6876	Q01995	transgelin	Cellular structure	131	0.54	0.692	0.08527	0.06		0.833	6	0	2009	2018
Colorectal Carcinoma	C0009402	MIR608	693193		microRNA 608		55	0.615	0.538		0.06		1	6	1	2012	2018
Colorectal Carcinoma	C0009402	THAS	7055		thoracoabdominal syndrome		120	0.56	0.808		0.06		1	6	0	2015	2019
Colorectal Carcinoma	C0009402	THBS2	7058	P35442	thrombospondin 2		149	0.526	0.769	0.55641	0.06		0.833	6	0	2015	2019
Colorectal Carcinoma	C0009402	TP53BP1	7158	Q12888	tumor protein p53 binding protein 1	Epigenetic regulator	158	0.52	0.731	0.99985	0.06		1	6	0	2015	2019
Colorectal Carcinoma	C0009402	TPM3	7170	P06753	tropomyosin 3	Cellular structure	297	0.49	0.808	0.0066522	0.06		1	6	0	2015	2019
Colorectal Carcinoma	C0009402	VPS51	738	Q9UID3	VPS51 subunit of GARP complex		292	0.452	0.846	1.052e-08	0.06		1	6	0	2004	2019
Colorectal Carcinoma	C0009402	VIP	7432	P01282	vasoactive intestinal peptide	Signaling	376	0.437	0.846	0.00041995	0.06		1	6	0	2015	2019
Colorectal Carcinoma	C0009402	XBP1	7494	P17861	X-box binding protein 1		234	0.477	0.846	0.032014	0.06		1	6	0	2007	2019
Colorectal Carcinoma	C0009402	XRCC2	7516	O43543	X-ray repair cross complementing 2		187	0.512	0.731	3.955e-07	0.06		1	6	3	2009	2018
Colorectal Carcinoma	C0009402	CA9	768	Q16790	carbonic anhydrase 9		226	0.483	0.731	1.3027e-09	0.06		1	6	0	2008	2019
Colorectal Carcinoma	C0009402	ADIPOR2	79602	Q86V24	adiponectin receptor 2	Receptor	103	0.564	0.731	0.36218	0.06		1	6	2	2010	2017
Colorectal Carcinoma	C0009402	LIN28A	79727	Q9H9Z2	lin-28 homolog A	Nucleic acid binding	161	0.523	0.731	0.019369	0.06		1	6	1	2013	2019
Colorectal Carcinoma	C0009402	PDCD1LG2	80380	Q9BQ51	programmed cell death 1 ligand 2		191	0.496	0.769	1.203e-05	0.06		1	6	0	2017	2019
Colorectal Carcinoma	C0009402	FOSL1	8061	P15407	FOS like 1, AP-1 transcription factor subunit	Transcription factor	150	0.519	0.846	0.15849	0.06		1	6	0	2014	2019
Colorectal Carcinoma	C0009402	COL18A1	80781	P39060	collagen type XVIII alpha 1 chain		323	0.449	0.808	1.7414e-10	0.06		1	6	0	2001	2018
Colorectal Carcinoma	C0009402	VANGL1	81839	Q8TAA9	VANGL planar cell polarity protein 1		104	0.57	0.538	0.020285	0.06		1	6	0	2009	2019
Colorectal Carcinoma	C0009402	TKTL1	8277	P51854	transketolase like 1	Enzyme	76	0.608	0.654	0.99933	0.06		1	6	0	2011	2020
Colorectal Carcinoma	C0009402	CASP2	835	P42575	caspase 2	Enzyme	105	0.565	0.731	0.0015026	0.06		1	6	0	2005	2019
Colorectal Carcinoma	C0009402	CFLAR	8837	O15519	CASP8 and FADD like apoptosis regulator	Enzyme	215	0.485	0.846	0.99967	0.06		0.833	6	0	2006	2019
Colorectal Carcinoma	C0009402	PER2	8864	O15055	period circadian regulator 2	Transcription factor	238	0.488	0.846	0.7148	0.06		1	6	0	2011	2019
Colorectal Carcinoma	C0009402	CCKBR	887	P32239	cholecystokinin B receptor	G-protein coupled receptor	105	0.573	0.615	2.1404e-06	0.06		1	6	0	1995	2012
Colorectal Carcinoma	C0009402	PIWIL1	9271	Q96J94	piwi like RNA-mediated gene silencing 1		99	0.57	0.731	7.2798e-14	0.06		1	6	0	2014	2019
Colorectal Carcinoma	C0009402	GAB2	9846	Q9UQC2	GRB2 associated binding protein 2	Receptor	110	0.563	0.692	0.98325	0.06		1	6	0	2014	2018
Colorectal Carcinoma	C0009402	MIR873	100126316		microRNA 873		67	0.601	0.538		0.05		0.8	5	0	2018	2020
Colorectal Carcinoma	C0009402	MIR216B	100126319		microRNA 216b		53	0.621	0.577		0.05		1	5	0	2017	2019
Colorectal Carcinoma	C0009402	MIR543	100126335		microRNA 543		68	0.593	0.692		0.05		0.8	5	0	2016	2019
Colorectal Carcinoma	C0009402	HOTTIP	100316868		HOXA distal transcript antisense RNA		90	0.575	0.654		0.05		1	5	2	2015	2019
Colorectal Carcinoma	C0009402	TRIM13	10206	O60858	tripartite motif containing 13		275	0.462	0.846	0.6366	0.05		1	5	0	1996	2019
Colorectal Carcinoma	C0009402	CDK9	1025	P50750	cyclin dependent kinase 9	Kinase	204	0.498	0.769	8.893e-05	0.05		1	5	0	2015	2019
Colorectal Carcinoma	C0009402	SNHG14	104472715		small nucleolar RNA host gene 14		44	0.656	0.577		0.05		0.8	5	0	2019	2020
Colorectal Carcinoma	C0009402	HOXB13	10481	Q92826	homeobox B13		90	0.573	0.462	3.6879e-08	0.05		0.8	5	1	2005	2015
Colorectal Carcinoma	C0009402	CHI3L1	1116	P36222	chitinase 3 like 1		420	0.419	0.885	1.1133e-05	0.05		0.8	5	1	2012	2018
Colorectal Carcinoma	C0009402	CYTOR	112597		cytoskeleton regulator RNA		90	0.568	0.577		0.05		1	5	0	2017	2019
Colorectal Carcinoma	C0009402	CREBBP	1387	Q92793	CREB binding protein		438	0.428	0.808	1	0.05		1	5	0	2007	2019
Colorectal Carcinoma	C0009402	CRY2	1408	Q49AN0	cryptochrome circadian regulator 2	Enzyme	76	0.599	0.692	0.00031808	0.05		1	5	0	2015	2018
Colorectal Carcinoma	C0009402	CTSD	1509	P07339	cathepsin D	Enzyme	242	0.478	0.846	0.00091747	0.05		1	5	0	1995	2019
Colorectal Carcinoma	C0009402	DAB2IP	153090	Q5VWQ8	DAB2 interacting protein	Enzyme modulator	82	0.588	0.538	0.99995	0.05		1	5	0	2015	2019
Colorectal Carcinoma	C0009402	CYP27B1	1594	O15528	cytochrome P450 family 27 subfamily B member 1	Enzyme	229	0.502	0.769	1.9194e-07	0.05		0.8	5	3	2005	2017
Colorectal Carcinoma	C0009402	CD55	1604	P08174	CD55 molecule (Cromer blood group)		187	0.51	0.808	5.6753e-12	0.05		1	5	0	2005	2019
Colorectal Carcinoma	C0009402	ATN1	1822	P54259	atrophin 1		499	0.409	0.885	0.99992	0.05		1	5	0	2013	2019
Colorectal Carcinoma	C0009402	DUSP4	1846	Q13115	dual specificity phosphatase 4		68	0.603	0.654	0.88152	0.05		1	5	0	2013	2018
Colorectal Carcinoma	C0009402	EIF4EBP1	1978	Q13541	eukaryotic translation initiation factor 4E binding protein 1	Nucleic acid binding	201	0.494	0.885	0.20762	0.05		1	5	0	2017	2019
Colorectal Carcinoma	C0009402	FABP6	2172	P51161	fatty acid binding protein 6		23	0.743	0.346	1.5516e-06	0.05		1	5	0	2006	2019
Colorectal Carcinoma	C0009402	ZEB1-AS1	220930		ZEB1 antisense RNA 1		50	0.636	0.423		0.05		1	5	0	2017	2019
Colorectal Carcinoma	C0009402	FGF7	2252	P21781	fibroblast growth factor 7	Signaling	167	0.519	0.846	0.77089	0.05		1	5	0	2000	2019
Colorectal Carcinoma	C0009402	FOXF1	2294	Q12946	forkhead box F1		135	0.54	0.692	0.95792	0.05		1	5	0	2012	2018
Colorectal Carcinoma	C0009402	FOXC1	2296	Q12948	forkhead box C1	Transcription factor	242	0.483	0.846	0.95337	0.05		1	5	0	2018	2020
Colorectal Carcinoma	C0009402	FOXO1	2308	Q12778	forkhead box O1		380	0.433	0.846	0.99725	0.05		1	5	0	2012	2019
Colorectal Carcinoma	C0009402	AKR1B1	231	P15121	aldo-keto reductase family 1 member B	Enzyme	220	0.491	0.885	2.0216e-05	0.05		1	5	0	2016	2018
Colorectal Carcinoma	C0009402	FLNA	2316	P21333	filamin A		571	0.419	0.846	1	0.05		0.8	5	0	2014	2019
Colorectal Carcinoma	C0009402	DICER1	23405	Q9UPY3	dicer 1, ribonuclease III	Enzyme	302	0.446	0.846	1	0.05		1	5	2	2013	2019
Colorectal Carcinoma	C0009402	ANGPTL2	23452	Q9UKU9	angiopoietin like 2	Signaling	125	0.545	0.731	0.0014712	0.05		1	5	0	2007	2015
Colorectal Carcinoma	C0009402	NUP62	23636	P37198	nucleoporin 62	Transporter	273	0.47	0.885	0.95006	0.05		1	5	0	1990	2019
Colorectal Carcinoma	C0009402	GJA1	2697	P17302	gap junction protein alpha 1	Cell-cell junction	662	0.393	0.885	0.15523	0.05		1	5	0	2012	2017
Colorectal Carcinoma	C0009402	NOX1	27035	Q9Y5S8	NADPH oxidase 1		142	0.536	0.808	8.6564e-08	0.05		1	5	0	2008	2019
Colorectal Carcinoma	C0009402	SNHG15	285958		small nucleolar RNA host gene 15		48	0.633	0.615		0.05		1	5	0	2019	2020
Colorectal Carcinoma	C0009402	GRB2	2885	P62993	growth factor receptor bound protein 2		122	0.546	0.769	0.93934	0.05		1	5	0	2011	2019
Colorectal Carcinoma	C0009402	GTF2H1	2965	P32780	general transcription factor IIH subunit 1	Transcription factor	258	0.469	0.846	0.98982	0.05		1	5	0	1990	2019
Colorectal Carcinoma	C0009402	GZMB	3002	P10144	granzyme B	Enzyme	290	0.453	0.808	3.6674e-14	0.05		1	5	1	2011	2018
Colorectal Carcinoma	C0009402	HDGF	3068	P51858	heparin binding growth factor	Signaling	89	0.575	0.654	0.27272	0.05		1	5	0	2005	2018
Colorectal Carcinoma	C0009402	ADGRE2	30817	Q9UHX3	adhesion G protein-coupled receptor E2	G-protein coupled receptor	86	0.581	0.615	2.7615e-28	0.05		1	5	0	2002	2018
Colorectal Carcinoma	C0009402	HLA-E	3133	P13747	major histocompatibility complex, class I, E		118	0.545	0.769	0.036773	0.05		0.8	5	0	2009	2020
Colorectal Carcinoma	C0009402	HMGCR	3156	P04035	3-hydroxy-3-methylglutaryl-CoA reductase		154	0.529	0.692	0.99861	0.05		1	5	1	2010	2019
Colorectal Carcinoma	C0009402	HOXA9	3205	P31269	homeobox A9		147	0.521	0.692	4.3591e-05	0.05		1	5	0	2017	2019
Colorectal Carcinoma	C0009402	HP	3240	P00738	haptoglobin	Enzyme	464	0.412	0.885	1.736e-05	0.05		1	5	0	2016	2020
Colorectal Carcinoma	C0009402	RSPO2	340419	Q6UXX9	R-spondin 2		113	0.558	0.577	0.024608	0.05		1	5	0	2014	2019
Colorectal Carcinoma	C0009402	APOE	348	P02649	apolipoprotein E		1049	0.338	0.962	0.0018685	0.05		1	5	2	2001	2009
Colorectal Carcinoma	C0009402	IGFBP2	3485	P18065	insulin like growth factor binding protein 2	Enzyme modulator	241	0.478	0.769	0.11898	0.05		1	5	0	1998	2019
Colorectal Carcinoma	C0009402	APRT	353	P07741	adenine phosphoribosyltransferase		384	0.423	0.846	5.4539e-13	0.05		1	5	0	1991	2017
Colorectal Carcinoma	C0009402	ITGA4	3676	P13612	integrin subunit alpha 4		123	0.558	0.769	0.00010067	0.05		1	5	0	2009	2019
Colorectal Carcinoma	C0009402	JAK1	3716	P23458	Janus kinase 1	Kinase	239	0.474	0.769	0.99998	0.05		1	5	0	2013	2019
Colorectal Carcinoma	C0009402	KCNQ1	3784	P51787	potassium voltage-gated channel subfamily Q member 1	Ion channel	281	0.485	0.769	4.5453e-08	0.05		1	5	0	2014	2019
Colorectal Carcinoma	C0009402	L1CAM	3897	P32004	L1 cell adhesion molecule		289	0.475	0.769	1	0.05		1	5	0	2009	2020
Colorectal Carcinoma	C0009402	LOXL2	4017	Q9Y4K0	lysyl oxidase like 2		149	0.527	0.731	3.3844e-07	0.05		1	5	0	2008	2018
Colorectal Carcinoma	C0009402	MIR107	406901		microRNA 107		123	0.543	0.769		0.05		1	5	0	2014	2019
Colorectal Carcinoma	C0009402	MIR10A	406902		microRNA 10a		158	0.513	0.846		0.05		0.8	5	0	2012	2019
Colorectal Carcinoma	C0009402	MIR122	406906		microRNA 122		250	0.468	0.808		0.05		1	5	0	2015	2019
Colorectal Carcinoma	C0009402	MIR15B	406949		microRNA 15b		134	0.532	0.769		0.05		0.8	5	0	2013	2018
Colorectal Carcinoma	C0009402	MIR181A2	406954		microRNA 181a-2		85	0.57	0.654		0.05		1	5	0	2012	2019
Colorectal Carcinoma	C0009402	MIR211	406993		microRNA 211		106	0.552	0.577		0.05		1	5	0	2012	2019
Colorectal Carcinoma	C0009402	MIR216A	406998		microRNA 216a		79	0.582	0.654		0.05		1	5	0	2014	2019
Colorectal Carcinoma	C0009402	MIR23B	407011		microRNA 23b		137	0.523	0.808		0.05		1	5	0	2017	2019
Colorectal Carcinoma	C0009402	MIR301A	407027		microRNA 301a		102	0.558	0.808		0.05		1	5	0	2015	2019
Colorectal Carcinoma	C0009402	SMAD5	4090	Q99717	SMAD family member 5	Transcription factor	55	0.633	0.615	0.99838	0.05		0.8	5	0	1997	2016
Colorectal Carcinoma	C0009402	MAX	4149	P61244	MYC associated factor X	Transcription factor	141	0.553	0.769	0.8335	0.05		1	5	0	2011	2019
Colorectal Carcinoma	C0009402	MMP12	4321	P39900	matrix metallopeptidase 12	Enzyme	216	0.484	0.885		0.05		1	5	1	2001	2017
Colorectal Carcinoma	C0009402	MIR372	442917		microRNA 372		72	0.593	0.615		0.05		1	5	0	2012	2019
Colorectal Carcinoma	C0009402	NEK2	4751	P51955	NIMA related kinase 2	Kinase	103	0.572	0.692	1.1514e-06	0.05		1	5	0	2010	2019
Colorectal Carcinoma	C0009402	NFATC2	4773	Q13469	nuclear factor of activated T cells 2	Transcription factor	154	0.525	0.731	0.99995	0.05		1	5	0	2012	2020
Colorectal Carcinoma	C0009402	MIR424	494336		microRNA 424		131	0.535	0.769		0.05		0.8	5	0	2013	2020
Colorectal Carcinoma	C0009402	PAEP	5047	P09466	progestagen associated endometrial protein	Enzyme	397	0.43	0.846	3.1109e-08	0.05		1	5	0	2011	2018
Colorectal Carcinoma	C0009402	ANGPTL4	51129	Q9BY76	angiopoietin like 4	Signaling	198	0.498	0.731	2.3089e-11	0.05		1	5	0	2011	2019
Colorectal Carcinoma	C0009402	DCTN4	51164	Q9UJW0	dynactin subunit 4		253	0.472	0.846	0.73221	0.05		1	5	0	1990	2019
Colorectal Carcinoma	C0009402	TMEM8B	51754	A6NDV4	transmembrane protein 8B	Cell adhesion	26	0.736	0.346	2.7974e-06	0.05		0.8	5	0	2003	2016
Colorectal Carcinoma	C0009402	SERPINF1	5176	P36955	serpin family F member 1	Enzyme modulator	294	0.46	0.846	7.8044e-08	0.05		0.8	5	0	2010	2019
Colorectal Carcinoma	C0009402	PGF	5228	P49763	placental growth factor	Signaling	288	0.46	0.846	0.1288	0.05		1	5	0	2005	2019
Colorectal Carcinoma	C0009402	SERPINA1	5265	P01009	serpin family A member 1	Enzyme modulator	482	0.41	0.923	6.8497e-08	0.05		1	5	0	2000	2019
Colorectal Carcinoma	C0009402	PLA2G1B	5319	P04054	phospholipase A2 group IB	Enzyme	268	0.468	0.846	1.0057e-10	0.05		1	5	0	1995	2013
Colorectal Carcinoma	C0009402	PLCG1	5335	P19174	phospholipase C gamma 1	Enzyme	116	0.564	0.692	7.9288e-05	0.05		1	5	0	1994	2018
Colorectal Carcinoma	C0009402	MIR429	554210		microRNA 429		117	0.544	0.731		0.05		1	5	0	2013	2018
Colorectal Carcinoma	C0009402	NLRP2	55655	Q9NX02	NLR family pyrin domain containing 2		155	0.515	0.731	1.4201e-38	0.05		1	5	0	2000	2016
Colorectal Carcinoma	C0009402	PRKAR1A	5573	P10644	protein kinase cAMP-dependent type I regulatory subunit alpha		597	0.401	0.846	0.99985	0.05		1	5	0	1996	2018
Colorectal Carcinoma	C0009402	KDM3A	55818	Q9Y4C1	lysine demethylase 3A	Epigenetic regulator	77	0.599	0.654	0.99999	0.05		1	5	0	2010	2019
Colorectal Carcinoma	C0009402	STK31	56164	Q9BXU1	serine/threonine kinase 31	Kinase	19	0.751	0.231	0.006616	0.05		1	5	0	2008	2019
Colorectal Carcinoma	C0009402	PRL	5617	P01236	prolactin	Signaling	506	0.406	0.885	2.9015e-07	0.05		1	5	0	1999	2009
Colorectal Carcinoma	C0009402	BACH1	571	O14867	BTB domain and CNC homolog 1		86	0.585	0.731	0.57072	0.05		1	5	0	2013	2020
Colorectal Carcinoma	C0009402	SALL4	57167	Q9UJQ4	spalt like transcription factor 4	Transcription factor	245	0.489	0.769	0.99997	0.05		1	5	0	2013	2019
Colorectal Carcinoma	C0009402	PTBP1	5725	P26599	polypyrimidine tract binding protein 1		172	0.517	0.769	0.99961	0.05		1	5	0	2015	2019
Colorectal Carcinoma	C0009402	DANCR	57291	P0C864	differentiation antagonizing non-protein coding RNA		65	0.601	0.615		0.05		1	5	0	2015	2019
Colorectal Carcinoma	C0009402	AICDA	57379	Q9GZX7	activation induced cytidine deaminase	Enzyme	265	0.463	0.885	9.2098e-06	0.05		0.8	5	0	2007	2017
Colorectal Carcinoma	C0009402	MIR491	574444		microRNA 491		58	0.619	0.577		0.05		1	5	0	2010	2019
Colorectal Carcinoma	C0009402	MIR202	574448		microRNA 202		82	0.579	0.769		0.05		1	5	0	2014	2019
Colorectal Carcinoma	C0009402	RAB1A	5861	P62820	RAB1A, member RAS oncogene family		56	0.623	0.615	0.82305	0.05		1	5	0	2017	2020
Colorectal Carcinoma	C0009402	RAD21	5885	O60216	RAD21 cohesin complex component		192	0.528	0.846	0.99701	0.05		1	5	0	2008	2018
Colorectal Carcinoma	C0009402	RASA1	5921	P20936	RAS p21 protein activator 1	Enzyme modulator	237	0.481	0.885	1	0.05		0.8	5	1	2014	2019
Colorectal Carcinoma	C0009402	REN	5972	P00797	renin	Enzyme	721	0.37	0.923	2.4297e-07	0.05		1	5	0	2012	2020
Colorectal Carcinoma	C0009402	RFC1	5981	P35251	replication factor C subunit 1		144	0.541	0.808	0.97305	0.05		0.8	5	0	2003	2015
Colorectal Carcinoma	C0009402	CXCL5	6374	P42830	C-X-C motif chemokine ligand 5	Signaling	160	0.519	0.769	5.0431e-06	0.05		0.8	5	0	2007	2019
Colorectal Carcinoma	C0009402	SEMA3F	6405	Q13275	semaphorin 3F	Signaling	55	0.653	0.615	0.99989	0.05		1	5	0	2011	2015
Colorectal Carcinoma	C0009402	SHH	6469	Q15465	sonic hedgehog signaling molecule		303	0.461	0.846	0.98258	0.05		1	5	0	2010	2020
Colorectal Carcinoma	C0009402	SHMT1	6470	P34896	serine hydroxymethyltransferase 1	Enzyme	106	0.566	0.654	1.275e-14	0.05		1	5	1	2010	2015
Colorectal Carcinoma	C0009402	SMYD3	64754	Q9H7B4	SET and MYND domain containing 3	Epigenetic regulator	57	0.633	0.462	1.4438e-07	0.05		1	5	0	2004	2018
Colorectal Carcinoma	C0009402	CDCP1	64866	Q9H5V8	CUB domain containing protein 1		81	0.604	0.654	0.0001002	0.05		1	5	0	2001	2020
Colorectal Carcinoma	C0009402	SLC1A5	6510	Q15758	solute carrier family 1 member 5	Transporter	81	0.587	0.577	0.16869	0.05		1	5	0	2005	2018
Colorectal Carcinoma	C0009402	SNCG	6623	O76070	synuclein gamma	Transporter	122	0.55	0.615	0.0008475	0.05		1	5	0	2008	2018
Colorectal Carcinoma	C0009402	SPINT1	6692	O43278	serine peptidase inhibitor, Kunitz type 1		96	0.57	0.577	1.0175e-05	0.05		1	5	0	2000	2019
Colorectal Carcinoma	C0009402	SRY	6736	Q05066	sex determining region Y	Transcription factor	315	0.456	0.808		0.05		1	5	0	2008	2019
Colorectal Carcinoma	C0009402	STAT6	6778	P42226	signal transducer and activator of transcription 6	Nucleic acid binding	281	0.475	0.808	0.98849	0.05		1	5	0	2013	2019
Colorectal Carcinoma	C0009402	STIM1	6786	Q13586	stromal interaction molecule 1		247	0.501	0.808	0.77534	0.05		1	5	0	2015	2018
Colorectal Carcinoma	C0009402	SYK	6850	P43405	spleen associated tyrosine kinase	Kinase	229	0.475	0.808	0.99986	0.05		1	5	0	2013	2018
Colorectal Carcinoma	C0009402	TAC1	6863	P20366	tachykinin precursor 1		478	0.424	0.923	0.74608	0.05		1	5	0	2012	2019
Colorectal Carcinoma	C0009402	MAP3K7	6885	O43318	mitogen-activated protein kinase kinase kinase 7	Kinase	273	0.477	0.808	0.99971	0.05		1	5	0	2013	2019
Colorectal Carcinoma	C0009402	MIR532	693124		microRNA 532		52	0.628	0.615		0.05		1	5	0	2018	2019
Colorectal Carcinoma	C0009402	TCF7	6932	P36402	transcription factor 7		108	0.556	0.654	0.0053732	0.05		1	5	0	1997	2019
Colorectal Carcinoma	C0009402	MIR622	693207		microRNA 622		48	0.638	0.5		0.05		1	5	0	2015	2019
Colorectal Carcinoma	C0009402	TFAM	7019	Q00059	transcription factor A, mitochondrial		147	0.529	0.731	0.17259	0.05		1	5	0	2011	2018
Colorectal Carcinoma	C0009402	TFF1	7031	P04155	trefoil factor 1	Signaling	147	0.529	0.769	0.00088929	0.05		1	5	0	1994	2019
Colorectal Carcinoma	C0009402	TNFRSF1B	7133	P20333	TNF receptor superfamily member 1B		417	0.425	0.885	0.50201	0.05		0.8	5	0	2006	2017
Colorectal Carcinoma	C0009402	TOP2A	7153	P11388	DNA topoisomerase II alpha		200	0.497	0.731	0.99086	0.05		1	5	0	1999	2017
Colorectal Carcinoma	C0009402	LINC00460	728192		long intergenic non-protein coding RNA 460		40	0.647	0.462		0.05		1	5	0	2018	2020
Colorectal Carcinoma	C0009402	POTEF	728378	A5A3E0	POTE ankyrin domain family member F		215	0.481	0.885	5.4522e-06	0.05		1	5	0	1998	2019
Colorectal Carcinoma	C0009402	CCR2	729230	P41597	C-C motif chemokine receptor 2		436	0.418	0.846	0.023412	0.05		1	5	0	2012	2019
Colorectal Carcinoma	C0009402	SLC35A2	7355	P78381	solute carrier family 35 member A2	Transporter	197	0.525	0.808	0.71792	0.05		1	5	0	2013	2015
Colorectal Carcinoma	C0009402	WEE1	7465	P30291	WEE1 G2 checkpoint kinase	Kinase	116	0.545	0.769	0.99973	0.05		0.8	5	0	2016	2019
Colorectal Carcinoma	C0009402	WNT1	7471	P04628	Wnt family member 1	Signaling	216	0.495	0.769	0.3263	0.05		1	5	0	2011	2019
Colorectal Carcinoma	C0009402	VTCN1	79679	Q7Z7D3	V-set domain containing T cell activation inhibitor 1	Enzyme modulator	139	0.529	0.692	1.3669e-12	0.05		1	5	0	2014	2020
Colorectal Carcinoma	C0009402	NCOA3	8202	Q9Y6Q9	nuclear receptor coactivator 3	Kinase	142	0.522	0.654	0.54065	0.05		1	5	0	2005	2020
Colorectal Carcinoma	C0009402	RHBDD1	84236	Q8TEB9	rhomboid domain containing 1	Enzyme	23	0.751	0.231	1.0582e-12	0.05		1	5	0	2015	2019
Colorectal Carcinoma	C0009402	RSPO3	84870	Q9BXY4	R-spondin 3		64	0.653	0.423	0.089252	0.05		1	5	0	2014	2017
Colorectal Carcinoma	C0009402	PPM1D	8493	O15297	protein phosphatase, Mg2+/Mn2+ dependent 1D	Enzyme	177	0.513	0.808	2.2321e-11	0.05		1	5	0	2001	2019
Colorectal Carcinoma	C0009402	RUNX1	861	Q01196	RUNX family transcription factor 1	Transcription factor	412	0.425	0.808	0.65377	0.05		1	5	0	2011	2019
Colorectal Carcinoma	C0009402	STC2	8614	O76061	stanniocalcin 2	Signaling	88	0.573	0.692	0.26588	0.05		1	5	0	2009	2019
Colorectal Carcinoma	C0009402	CBS	875	P0DN79;P35520	cystathionine beta-synthase	Enzyme	295	0.465	0.885	3.0799e-05	0.05		1	5	3	2002	2017
Colorectal Carcinoma	C0009402	IQGAP1	8826	P46940	IQ motif containing GTPase activating protein 1	Enzyme modulator	109	0.56	0.692	0.99754	0.05		1	5	0	2010	2018
Colorectal Carcinoma	C0009402	NRP2	8828	O60462	neuropilin 2		144	0.539	0.615	0.00080686	0.05		0.8	5	0	2008	2019
Colorectal Carcinoma	C0009402	CACNA1G	8913	O43497	calcium voltage-gated channel subunit alpha1 G	Ion channel	111	0.59	0.577	1	0.05		1	5	0	1999	2011
Colorectal Carcinoma	C0009402	AURKB	9212	Q96GD4	aurora kinase B	Kinase	161	0.51	0.769	0.0044521	0.05		1	5	0	2001	2017
Colorectal Carcinoma	C0009402	XPR1	9213	Q9UBH6	xenotropic and polytropic retrovirus receptor 1	Transporter	217	0.488	0.731	0.99999	0.05		1	5	0	2010	2018
Colorectal Carcinoma	C0009402	CD36	948	P16671	CD36 molecule	Receptor	351	0.446	0.846	1.0857e-60	0.05		1	5	0	2005	2019
Colorectal Carcinoma	C0009402	TBPL1	9519	P62380	TATA-box binding protein like 1	Transcription factor	198	0.506	0.846	0.37902	0.05		1	5	0	2009	2019
Colorectal Carcinoma	C0009402	ADGRE5	976	P48960	adhesion G protein-coupled receptor E5	G-protein coupled receptor	74	0.601	0.538	3.0761e-06	0.05		1	5	0	2002	2018
Colorectal Carcinoma	C0009402	NR1I3	9970	Q14994	nuclear receptor subfamily 1 group I member 3	Nuclear receptor	318	0.448	0.846	3.5259e-08	0.05		1	5	0	1996	2018
Colorectal Carcinoma	C0009402	MIR708	100126333		microRNA 708		86	0.57	0.692		0.04		1	4	0	2013	2019
Colorectal Carcinoma	C0009402	MIR944	100126340		microRNA 944		37	0.678	0.269		0.04		1	4	0	2017	2019
Colorectal Carcinoma	C0009402	GAEC1	100126794		gene amplified in esophageal cancer 1		16	0.769	0.077		0.04		1	4	0	2010	2019
Colorectal Carcinoma	C0009402	SLCO4A1-AS1	100127888		SLCO4A1 antisense RNA 1		9	0.839	0.154		0.04		1	4	0	2018	2019
Colorectal Carcinoma	C0009402	BCL2L11	10018	O43521	BCL2 like 11		173	0.51	0.731	0.88857	0.04		1	4	0	2008	2019
Colorectal Carcinoma	C0009402	CASC11	100270680		cancer susceptibility 11		45	0.641	0.577		0.04		1	4	0	2016	2019
Colorectal Carcinoma	C0009402	MIR1290	100302276		microRNA 1290		62	0.61	0.615		0.04		1	4	0	2016	2019
Colorectal Carcinoma	C0009402	SNHG16	100507246		small nucleolar RNA host gene 16		59	0.608	0.577		0.04		1	4	0	2015	2020
Colorectal Carcinoma	C0009402	MUC12	10071	Q9UKN1	mucin 12, cell surface associated		10	0.792	0.192	1.2792e-68	0.04		1	4	0	1999	2019
Colorectal Carcinoma	C0009402	COMETT	100996266		cytosolic oncogenic antisense to MET transcript		41	0.678	0.538		0.04		1	4	0	2017	2019
Colorectal Carcinoma	C0009402	CDH17	1015	Q12864	cadherin 17		58	0.636	0.615	3.4172e-14	0.04		1	4	2	2005	2018
Colorectal Carcinoma	C0009402	BLACAT1	101669762		bladder cancer associated transcript 1		42	0.647	0.346		0.04		1	4	0	2017	2018
Colorectal Carcinoma	C0009402	RNF41	10193	Q9H4P4	ring finger protein 41		40	0.674	0.538	0.96847	0.04		1	4	0	2014	2017
Colorectal Carcinoma	C0009402	CDK6	1021	Q00534	cyclin dependent kinase 6	Kinase	266	0.471	0.731	0.98315	0.04		1	4	0	2017	2020
Colorectal Carcinoma	C0009402	CDK2AP2	10263	O75956	cyclin dependent kinase 2 associated protein 2	Enzyme modulator	117	0.544	0.808	0.78801	0.04		1	4	0	2001	2007
Colorectal Carcinoma	C0009402	TP53COR1	102800311		tumor protein p53 pathway corepressor 1		57	0.628	0.5		0.04		1	4	0	2013	2017
Colorectal Carcinoma	C0009402	PAK4	10298	O96013	p21 (RAC1) activated kinase 4	Kinase	81	0.584	0.731	4.3602e-05	0.04		1	4	0	2015	2020
Colorectal Carcinoma	C0009402	IKZF1	10320	Q13422	IKAROS family zinc finger 1	Transcription factor	165	0.533	0.769	0.9986	0.04		1	4	0	2015	2018
Colorectal Carcinoma	C0009402	PRMT5	10419	O14744	protein arginine methyltransferase 5	Epigenetic regulator	131	0.539	0.769	0.99999	0.04		1	4	0	2015	2019
Colorectal Carcinoma	C0009402	CEBPB	1051	P17676	CCAAT enhancer binding protein beta	Transcription factor	182	0.508	0.731	0.35809	0.04		1	4	0	2000	2018
Colorectal Carcinoma	C0009402	KAT5	10524	Q92993	lysine acetyltransferase 5		138	0.534	0.769	0.088234	0.04		1	4	0	2002	2018
Colorectal Carcinoma	C0009402	NPRL2	10641	Q8WTW4	NPR2 like, GATOR1 complex subunit	Enzyme	45	0.644	0.462	0.38813	0.04		1	4	0	2014	2019
Colorectal Carcinoma	C0009402	IGF2BP2	10644	Q9Y6M1	insulin like growth factor 2 mRNA binding protein 2	Enzyme	94	0.588	0.615	0.23861	0.04		1	4	0	2010	2019
Colorectal Carcinoma	C0009402	PLK2	10769	Q9NYY3	polo like kinase 2	Kinase	97	0.575	0.808	0.9999	0.04		1	4	0	2016	2018
Colorectal Carcinoma	C0009402	ADAM28	10863	Q9UKQ2	ADAM metallopeptidase domain 28	Enzyme	41	0.666	0.5	2.9634e-24	0.04		1	4	0	2013	2019
Colorectal Carcinoma	C0009402	CEACAM4	1089	O75871	CEA cell adhesion molecule 4		25	0.716	0.423	6.1219e-08	0.04		1	4	0	1990	1997
Colorectal Carcinoma	C0009402	BTG3	10950	Q14201	BTG anti-proliferation factor 3		141	0.528	0.808	0.91582	0.04		1	4	0	2016	2019
Colorectal Carcinoma	C0009402	IL24	11009	Q13007	interleukin 24		202	0.498	0.769	5.8826e-07	0.04		1	4	0	2005	2014
Colorectal Carcinoma	C0009402	RIPK3	11035	Q9Y572	receptor interacting serine/threonine kinase 3	Kinase	196	0.497	0.885	1.1874e-14	0.04		1	4	0	2017	2019
Colorectal Carcinoma	C0009402	RPP14	11102	O95059	ribonuclease P/MRP subunit p14		117	0.544	0.808	0.0019269	0.04		1	4	0	2001	2007
Colorectal Carcinoma	C0009402	DUSP10	11221	Q9Y6W6	dual specificity phosphatase 10		36	0.686	0.577	0.8335	0.04		1	4	3	2014	2019
Colorectal Carcinoma	C0009402	FILIP1L	11259	Q4L180	filamin A interacting protein 1 like		31	0.705	0.5	1.0757e-09	0.04		1	4	0	2003	2016
Colorectal Carcinoma	C0009402	H3P8	115482693		H3 histone pseudogene 8		116	0.544	0.808		0.04		1	4	0	2001	2007
Colorectal Carcinoma	C0009402	CTHRC1	115908	Q96CG8	collagen triple helix repeat containing 1	Enzyme	105	0.556	0.692	2.6661e-05	0.04		1	4	0	2015	2018
Colorectal Carcinoma	C0009402	TWIST2	117581	Q8WVJ9	twist family bHLH transcription factor 2	Transcription factor	198	0.518	0.731	0.56004	0.04		1	4	0	2013	2018
Colorectal Carcinoma	C0009402	CMA1	1215	P23946	chymase 1	Enzyme	157	0.514	0.692	7.5861e-09	0.04		1	4	0	2015	2019
Colorectal Carcinoma	C0009402	CCR5	1234	P51681	C-C motif chemokine receptor 5 (gene/pseudogene)	G-protein coupled receptor	508	0.398	0.885	4.3094e-10	0.04		0.75	4	0	2010	2019
Colorectal Carcinoma	C0009402	CCR7	1236	P32248	C-C motif chemokine receptor 7	G-protein coupled receptor	320	0.443	0.769	0.057623	0.04		1	4	0	2008	2019
Colorectal Carcinoma	C0009402	MAP3K8	1326	P41279	mitogen-activated protein kinase kinase kinase 8	Kinase	168	0.516	0.846	0.96825	0.04		1	4	0	2009	2018
Colorectal Carcinoma	C0009402	ADM	133	P35318	adrenomedullin	Signaling	405	0.436	0.808	0.040831	0.04		1	4	0	2011	2014
Colorectal Carcinoma	C0009402	CRY1	1407	Q16526	cryptochrome circadian regulator 1	Enzyme	91	0.585	0.769	1.662e-09	0.04		1	4	0	2013	2018
Colorectal Carcinoma	C0009402	CRYAB	1410	P02511	crystallin alpha B		200	0.515	0.731	0.02247	0.04		1	4	3	2014	2018
Colorectal Carcinoma	C0009402	CSNK1E	1454	P49674	casein kinase 1 epsilon		61	0.619	0.615	0.99926	0.04		1	4	0	2014	2017
Colorectal Carcinoma	C0009402	CTAG1B	1485	P78358	cancer/testis antigen 1B		166	0.507	0.731		0.04		1	4	0	2005	2017
Colorectal Carcinoma	C0009402	PDIK1L	149420	Q8N165	PDLIM1 interacting kinase 1 like	Kinase	138	0.534	0.769	0.26436	0.04		1	4	0	2005	2016
Colorectal Carcinoma	C0009402	CXADR	1525	P78310	CXADR Ig-like cell adhesion molecule		305	0.454	0.885	0.36867	0.04		1	4	0	1996	2018
Colorectal Carcinoma	C0009402	FEZF1-AS1	154860		FEZF1 antisense RNA 1		45	0.644	0.615		0.04		1	4	0	2016	2020
Colorectal Carcinoma	C0009402	CYP2C19	1557	P33261	cytochrome P450 family 2 subfamily C member 19		274	0.467	0.846	6.4882e-20	0.04		1	4	0	2011	2016
Colorectal Carcinoma	C0009402	DAPK1	1612	P53355	death associated protein kinase 1	Kinase	249	0.472	0.808	0.99767	0.04		1	4	1	2005	2019
Colorectal Carcinoma	C0009402	DECR1	1666	Q16698	2,4-dienoyl-CoA reductase 1	Enzyme	399	0.426	0.885	4.4689e-14	0.04		1	4	0	2017	2018
Colorectal Carcinoma	C0009402	TIMM8A	1678	O60220	translocase of inner mitochondrial membrane 8A		200	0.51	0.846	0.65195	0.04		1	4	0	2014	2018
Colorectal Carcinoma	C0009402	AFP	174	P02771	alpha fetoprotein	Transporter	392	0.429	0.885	1.1383e-11	0.04		1	4	0	2002	2019
Colorectal Carcinoma	C0009402	DRD2	1813	P14416	dopamine receptor D2	G-protein coupled receptor	437	0.436	0.846	0.74709	0.04		1	4	0	1994	2009
Colorectal Carcinoma	C0009402	DUSP2	1844	Q05923	dual specificity phosphatase 2		118	0.558	0.769	4.4697e-05	0.04		1	4	0	2017	2018
Colorectal Carcinoma	C0009402	DVL2	1856	O14641	dishevelled segment polarity protein 2	Signaling	58	0.621	0.577	1.3576e-05	0.04		1	4	2	2010	2019
Colorectal Carcinoma	C0009402	E2F4	1874	Q16254	E2F transcription factor 4	Nucleic acid binding	76	0.599	0.692	0.45258	0.04		1	4	0	1996	2013
Colorectal Carcinoma	C0009402	ECT2	1894	Q9H8V3	epithelial cell transforming 2		65	0.603	0.615	8.0837e-10	0.04		1	4	0	2011	2017
Colorectal Carcinoma	C0009402	EFNA1	1942	P20827	ephrin A1	Kinase	69	0.61	0.5	0.46263	0.04		1	4	1	2013	2019
Colorectal Carcinoma	C0009402	ELAVL1	1994	Q15717	ELAV like RNA binding protein 1		103	0.56	0.731	0.98849	0.04		1	4	0	2017	2018
Colorectal Carcinoma	C0009402	ESRRA	2101	P11474	estrogen related receptor alpha	Nuclear receptor	112	0.548	0.654	0.59696	0.04		1	4	0	2013	2019
Colorectal Carcinoma	C0009402	FCGR2A	2212	P12318	Fc fragment of IgG receptor IIa	Cell adhesion	227	0.48	0.769	2.0054e-06	0.04		1	4	0	2010	2020
Colorectal Carcinoma	C0009402	FGF13	2258	Q92913	fibroblast growth factor 13	Signaling	167	0.514	0.808	0.89489	0.04		1	4	0	2009	2019
Colorectal Carcinoma	C0009402	MMRN1	22915	Q13201	multimerin 1		272	0.465	0.846	2.0714e-25	0.04		0.75	4	0	2013	2016
Colorectal Carcinoma	C0009402	SIRT2	22933	Q8IXJ6	sirtuin 2	Epigenetic regulator	172	0.51	0.769	2.3295e-08	0.04		1	4	1	2017	2019
Colorectal Carcinoma	C0009402	KDM4B	23030	O94953	lysine demethylase 4B	Epigenetic regulator	71	0.606	0.462	1	0.04		1	4	0	2013	2018
Colorectal Carcinoma	C0009402	PHLPP2	23035	Q6ZVD8	PH domain and leucine rich repeat protein phosphatase 2		45	0.641	0.346	1.2128e-06	0.04		0.75	4	0	2013	2019
Colorectal Carcinoma	C0009402	POFUT1	23509	Q9H488	protein O-fucosyltransferase 1		45	0.65	0.538	0.96303	0.04		1	4	0	2018	2019
Colorectal Carcinoma	C0009402	CTAG1A	246100	P78358	cancer/testis antigen 1A		161	0.508	0.731		0.04		1	4	0	2005	2017
Colorectal Carcinoma	C0009402	FUT6	2528	P51993	fucosyltransferase 6	Enzyme	29	0.695	0.385		0.04		1	4	0	1998	2019
Colorectal Carcinoma	C0009402	GATA2	2624	P23769	GATA binding protein 2		229	0.496	0.654	0.97927	0.04		0.75	4	1	2013	2016
Colorectal Carcinoma	C0009402	GDNF	2668	P39905	glial cell derived neurotrophic factor	Signaling	409	0.434	0.885	0.2035	0.04		1	4	0	2013	2019
Colorectal Carcinoma	C0009402	GEM	2669	P55040	GTP binding protein overexpressed in skeletal muscle		251	0.467	0.769	1.179e-08	0.04		1	4	0	2015	2017
Colorectal Carcinoma	C0009402	GHR	2690	P10912	growth hormone receptor	Signaling	247	0.49	0.846	8.4385e-05	0.04		1	4	1	2004	2014
Colorectal Carcinoma	C0009402	DKK3	27122	Q9UBP4	dickkopf WNT signaling pathway inhibitor 3		186	0.5	0.731	4.1049e-06	0.04		0.75	4	1	2009	2020
Colorectal Carcinoma	C0009402	AGO2	27161	Q9UKV8	argonaute RISC catalytic component 2		186	0.501	0.885	1	0.04		1	4	0	2010	2019
Colorectal Carcinoma	C0009402	MCAT	27349	Q8IVS2	malonyl-CoA-acyl carrier protein transacylase		147	0.524	0.808	0.00030611	0.04		1	4	0	2015	2019
Colorectal Carcinoma	C0009402	SLCO4A1	28231	Q96BD0	solute carrier organic anion transporter family member 4A1	Transporter	16	0.769	0.269	1.0328e-10	0.04		1	4	0	2015	2019
Colorectal Carcinoma	C0009402	LYPD5	284348	Q6UWN5	LY6/PLAUR domain containing 5		64	0.608	0.615	0.00047161	0.04		1	4	0	2011	2014
Colorectal Carcinoma	C0009402	GPX1	2876	P07203	glutathione peroxidase 1	Enzyme	290	0.458	0.923	3.8518e-05	0.04		0.75	4	1	2005	2016
Colorectal Carcinoma	C0009402	GPX2	2877	P18283	glutathione peroxidase 2	Enzyme	60	0.619	0.5	0.00014995	0.04		1	4	0	2004	2019
Colorectal Carcinoma	C0009402	LAMTOR2	28956	Q9Y2Q5	late endosomal/lysosomal adaptor, MAPK and MTOR activator 2		129	0.538	0.808	0.19816	0.04		1	4	0	2001	2007
Colorectal Carcinoma	C0009402	MCTS1	28985	Q9ULC4	MCTS1 re-initiation and release factor	Receptor	109	0.552	0.692	0.87474	0.04		1	4	0	2015	2019
Colorectal Carcinoma	C0009402	RMC1	29919	Q96DM3	regulator of MON1-CCZ1		110	0.555	0.731	0.98823	0.04		1	4	0	2003	2017
Colorectal Carcinoma	C0009402	ANXA3	306	P12429	annexin A3		66	0.61	0.615	6.5152e-12	0.04		1	4	0	2016	2019
Colorectal Carcinoma	C0009402	HIC1	3090	Q14526	HIC ZBTB transcriptional repressor 1	Transcription factor	163	0.522	0.615	0.13002	0.04		1	4	0	2001	2011
Colorectal Carcinoma	C0009402	HK2	3099	P52789	hexokinase 2	Kinase	152	0.515	0.769	0.0045893	0.04		1	4	0	2017	2019
Colorectal Carcinoma	C0009402	NR4A1	3164	P22736	nuclear receptor subfamily 4 group A member 1	Nuclear receptor	216	0.49	0.731	0.37074	0.04		1	4	0	2014	2019
Colorectal Carcinoma	C0009402	HOXA4	3201	Q00056	homeobox A4		37	0.663	0.5	8.5959e-06	0.04		1	4	0	2014	2019
Colorectal Carcinoma	C0009402	HOXB7	3217	P09629	homeobox B7	Transcription factor	93	0.57	0.615	0.00028382	0.04		1	4	0	2011	2019
Colorectal Carcinoma	C0009402	HOXD10	3236	P28358	homeobox D10		83	0.59	0.538	0.062918	0.04		1	4	0	2014	2019
Colorectal Carcinoma	C0009402	HSD17B1	3292	P14061	hydroxysteroid 17-beta dehydrogenase 1	Enzyme	69	0.61	0.615	0.00013421	0.04		1	4	0	2011	2013
Colorectal Carcinoma	C0009402	HSPA9	3313	P38646	heat shock protein family A (Hsp70) member 9		198	0.502	0.885	0.96852	0.04		1	4	0	2013	2020
Colorectal Carcinoma	C0009402	KLK3	354	P07288	kallikrein related peptidase 3	Enzyme	358	0.443	0.885	4.4271e-06	0.04		1	4	0	2008	2019
Colorectal Carcinoma	C0009402	IL12B	3593	P29460	interleukin 12B	Signaling	249	0.48	0.885	0.00011439	0.04		0.75	4	1	2009	2019
Colorectal Carcinoma	C0009402	ITGA2	3673	P17301	integrin subunit alpha 2		166	0.522	0.731	6.2805e-11	0.04		0.5	4	0	2009	2019
Colorectal Carcinoma	C0009402	ITGAV	3685	P06756	integrin subunit alpha V		141	0.526	0.769	0.00022844	0.04		1	4	0	2001	2017
Colorectal Carcinoma	C0009402	KIR3DL1	3811	P43629	killer cell immunoglobulin like receptor, three Ig domains and long cytoplasmic tail 1	Receptor	231	0.475	0.769	8.3578e-14	0.04		1	4	0	2015	2017
Colorectal Carcinoma	C0009402	C12orf75	387882	Q8TAD7	chromosome 12 open reading frame 75		17	0.729	0.423	0.63977	0.04		1	4	0	2017	2019
Colorectal Carcinoma	C0009402	LIN28B	389421	Q6ZN17	lin-28 homolog B		126	0.556	0.654	0.55513	0.04		1	4	1	2012	2019
Colorectal Carcinoma	C0009402	LDHB	3945	P07195	lactate dehydrogenase B	Enzyme	74	0.604	0.615	4.9734e-06	0.04		1	4	0	2016	2019
Colorectal Carcinoma	C0009402	LGALS1	3956	P09382	galectin 1	Signaling	362	0.435	0.846	0.004488	0.04		1	4	0	2010	2017
Colorectal Carcinoma	C0009402	LPA	4018	P08519	lipoprotein(a)	Enzyme	340	0.444	0.769	6.5917e-89	0.04		1	4	0	2004	2019
Colorectal Carcinoma	C0009402	LTA	4049	P01374	lymphotoxin alpha	Signaling	353	0.434	0.885	0.19685	0.04		0.75	4	1	1998	2019
Colorectal Carcinoma	C0009402	MIRLET7E	406887		microRNA let-7e		72	0.592	0.769		0.04		1	4	1	2017	2019
Colorectal Carcinoma	C0009402	MIR100	406892		microRNA 100		146	0.521	0.846		0.04		1	4	0	2014	2017
Colorectal Carcinoma	C0009402	MIR132	406921		microRNA 132		222	0.485	0.846		0.04		1	4	0	2014	2019
Colorectal Carcinoma	C0009402	MIR197	406974		microRNA 197		93	0.565	0.615		0.04		1	4	0	2015	2019
Colorectal Carcinoma	C0009402	MIR200A	406983		microRNA 200a		156	0.519	0.808		0.04		1	4	0	2014	2019
Colorectal Carcinoma	C0009402	MIR212	406994		microRNA 212		126	0.535	0.808		0.04		1	4	0	2013	2018
Colorectal Carcinoma	C0009402	MIR217	406999		microRNA 217		116	0.543	0.769		0.04		1	4	0	2015	2019
Colorectal Carcinoma	C0009402	ARR3	407	P36575	arrestin 3	Enzyme modulator	279	0.46	0.846	0.10401	0.04		1	4	0	1996	2018
Colorectal Carcinoma	C0009402	MIR28	407020		microRNA 28		75	0.597	0.731		0.04		1	4	0	2012	2019
Colorectal Carcinoma	C0009402	MIR30B	407030		microRNA 30b		109	0.555	0.808		0.04		1	4	0	2014	2019
Colorectal Carcinoma	C0009402	MIR33A	407039		microRNA 33a		100	0.56	0.654		0.04		1	4	0	2017	2019
Colorectal Carcinoma	C0009402	MDK	4192	P21741	midkine	Signaling	209	0.494	0.808	0.23005	0.04		1	4	0	1996	2017
Colorectal Carcinoma	C0009402	MDM4	4194	O15151	MDM4 regulator of p53	Nucleic acid binding	265	0.461	0.808	0.99992	0.04		1	4	0	2011	2019
Colorectal Carcinoma	C0009402	MIR330	442902		microRNA 330		81	0.584	0.692		0.04		1	4	0	2013	2020
Colorectal Carcinoma	C0009402	MIR340	442908		microRNA 340		99	0.561	0.692		0.04		1	4	0	2012	2018
Colorectal Carcinoma	C0009402	MIR373	442918		microRNA 373		97	0.556	0.692		0.04		1	4	0	2016	2018
Colorectal Carcinoma	C0009402	MSI1	4440	O43347	musashi RNA binding protein 1		116	0.55	0.615	0.99357	0.04		1	4	0	2014	2017
Colorectal Carcinoma	C0009402	MSX2	4488	P35548	msh homeobox 2	Transcription factor	135	0.539	0.769	0.26173	0.04		1	4	0	2004	2017
Colorectal Carcinoma	C0009402	MYBPC3	4607	Q14896	myosin binding protein C3		100	0.593	0.385	8.0087e-11	0.04		1	4	0	2015	2019
Colorectal Carcinoma	C0009402	MYH11	4629	P35749	myosin heavy chain 11		161	0.528	0.731	0.77299	0.04		1	4	0	2008	2018
Colorectal Carcinoma	C0009402	MYOD1	4654	P15172	myogenic differentiation 1	Transcription factor	106	0.569	0.654	0.15239	0.04		1	4	0	1997	2004
Colorectal Carcinoma	C0009402	CEACAM6	4680	P40199	CEA cell adhesion molecule 6		110	0.561	0.731	1.1884e-06	0.04		1	4	0	2003	2015
Colorectal Carcinoma	C0009402	NCAM1	4684	P13591	neural cell adhesion molecule 1		445	0.415	0.885	0.99999	0.04		1	4	0	2013	2019
Colorectal Carcinoma	C0009402	ATOH1	474	Q92858	atonal bHLH transcription factor 1	Enzyme	53	0.633	0.5	0.017833	0.04		1	4	0	2007	2018
Colorectal Carcinoma	C0009402	NEUROG1	4762	Q92886	neurogenin 1	Enzyme	41	0.656	0.538	0.00021722	0.04		1	4	0	2006	2013
Colorectal Carcinoma	C0009402	NFKBIA	4792	P25963	NFKB inhibitor alpha		226	0.487	0.885	0.99452	0.04		1	4	3	2003	2013
Colorectal Carcinoma	C0009402	NOTCH3	4854	Q9UM47	notch receptor 3		418	0.435	0.808	0.40757	0.04		1	4	0	2007	2017
Colorectal Carcinoma	C0009402	YBX1	4904	P67809	Y-box binding protein 1		148	0.519	0.769	0.94646	0.04		1	4	0	2010	2020
Colorectal Carcinoma	C0009402	NT5E	4907	P21589	5'-nucleotidase ecto	Enzyme	376	0.436	0.885	2.2881e-11	0.04		1	4	0	2016	2019
Colorectal Carcinoma	C0009402	MIR422A	494334		microRNA 422a		38	0.653	0.538		0.04		1	4	0	2012	2017
Colorectal Carcinoma	C0009402	MIR425	494337		microRNA 425		78	0.581	0.654		0.04		1	4	0	2016	2019
Colorectal Carcinoma	C0009402	TNFRSF11B	4982	O00300	TNF receptor superfamily member 11b		443	0.422	0.808	0.16171	0.04		1	4	0	2011	2018
Colorectal Carcinoma	C0009402	ABHD5	51099	Q8WTS1	abhydrolase domain containing 5		76	0.641	0.538	6.4201e-07	0.04		0.75	4	0	2016	2019
Colorectal Carcinoma	C0009402	TLR7	51284	Q9NYK1	toll like receptor 7		276	0.464	0.885	0.97912	0.04		1	4	0	2010	2020
Colorectal Carcinoma	C0009402	ZBTB7A	51341	O95365	zinc finger and BTB domain containing 7A	Transcription factor	103	0.564	0.769	0.95915	0.04		1	4	0	2013	2018
Colorectal Carcinoma	C0009402	HSD17B7	51478	P56937	hydroxysteroid 17-beta dehydrogenase 7		81	0.582	0.5	6.6475e-06	0.04		1	4	0	2003	2017
Colorectal Carcinoma	C0009402	SF3B6	51639	Q9Y3B4	splicing factor 3b subunit 6		116	0.544	0.808	0.58902	0.04		1	4	0	2001	2007
Colorectal Carcinoma	C0009402	CMPK1	51727	P30085	cytidine/uridine monophosphate kinase 1	Kinase	55	0.626	0.577	0.84789	0.04		1	4	0	1991	2018
Colorectal Carcinoma	C0009402	PITX2	5308	Q99697	paired like homeodomain 2		248	0.489	0.808	0.97618	0.04		1	4	0	2011	2018
Colorectal Carcinoma	C0009402	PLAUR	5329	Q03405	plasminogen activator, urokinase receptor		147	0.536	0.731	0.0053378	0.04		1	4	0	1998	2010
Colorectal Carcinoma	C0009402	PLS3	5358	P13797	plastin 3	Cellular structure	47	0.656	0.5	0.98844	0.04		1	4	0	2013	2015
Colorectal Carcinoma	C0009402	POLB	5423	P06746	DNA polymerase beta	Enzyme	63	0.606	0.654	3.4002e-05	0.04		1	4	0	1992	2011
Colorectal Carcinoma	C0009402	PON1	5444	P27169	paraoxonase 1		496	0.409	0.885	9.8142e-11	0.04		0.75	4	2	2005	2019
Colorectal Carcinoma	C0009402	RETREG1	54463	Q9H6L5	reticulophagy regulator 1		89	0.623	0.538	6.3577e-06	0.04		1	4	0	2014	2018
Colorectal Carcinoma	C0009402	UGT1A10	54575	Q9HAW8	UDP glucuronosyltransferase family 1 member A10		88	0.588	0.615	4.5886e-19	0.04		1	4	6	2011	2016
Colorectal Carcinoma	C0009402	ESRP1	54845	Q6NXG1	epithelial splicing regulatory protein 1	Nucleic acid binding	56	0.628	0.5	0.99934	0.04		1	4	0	2009	2017
Colorectal Carcinoma	C0009402	TENM3	55714	Q9P273	teneurin transmembrane protein 3		72	0.599	0.692	0.99955	0.04		1	4	1	2014	2018
Colorectal Carcinoma	C0009402	PBK	55872	Q96KB5	PDZ binding kinase	Kinase	121	0.541	0.769	1.2188e-06	0.04		1	4	0	2012	2019
Colorectal Carcinoma	C0009402	CMAS	55907	Q8NFW8	cytidine monophosphate N-acetylneuraminic acid synthetase	Enzyme	49	0.644	0.769	0.56141	0.04		1	4	0	2011	2019
Colorectal Carcinoma	C0009402	PNPLA2	57104	Q96AD5	patatin like phospholipase domain containing 2	Enzyme	199	0.511	0.846	0.0041069	0.04		1	4	0	2010	2018
Colorectal Carcinoma	C0009402	BAG1	573	Q99933	BAG cochaperone 1		128	0.538	0.769	6.5264e-06	0.04		1	4	0	2008	2016
Colorectal Carcinoma	C0009402	MIR362	574030		microRNA 362		47	0.641	0.423		0.04		1	4	0	2013	2019
Colorectal Carcinoma	C0009402	MIR363	574031		microRNA 363		83	0.578	0.692		0.04		1	4	0	2016	2019
Colorectal Carcinoma	C0009402	MIR485	574436		microRNA 485		70	0.593	0.731		0.04		1	4	0	2018	2018
Colorectal Carcinoma	C0009402	MIR490	574443		microRNA 490		68	0.588	0.538		0.04		1	4	0	2015	2018
Colorectal Carcinoma	C0009402	MIR494	574452		microRNA 494		131	0.531	0.692		0.04		1	4	0	2014	2018
Colorectal Carcinoma	C0009402	MIR519D	574480		microRNA 519d		47	0.636	0.423		0.04		1	4	0	2017	2018
Colorectal Carcinoma	C0009402	MIR503	574506		microRNA 503		111	0.551	0.808		0.04		1	4	0	2015	2019
Colorectal Carcinoma	C0009402	MIR506	574511		microRNA 506		76	0.585	0.615		0.04		1	4	0	2015	2019
Colorectal Carcinoma	C0009402	HACE1	57531	Q8IYU2	HECT domain and ankyrin repeat containing E3 ubiquitin protein ligase 1	Enzyme	95	0.601	0.692	6.0798e-06	0.04		1	4	0	2008	2019
Colorectal Carcinoma	C0009402	PCDH10	57575	Q9P2E7	protocadherin 10		87	0.582	0.769	0.89066	0.04		1	4	0	2013	2017
Colorectal Carcinoma	C0009402	BAK1	578	Q16611	BCL2 antagonist/killer 1	Signaling	115	0.555	0.769	7.4028e-06	0.04		1	4	0	2000	2018
Colorectal Carcinoma	C0009402	PTPN11	5781	Q06124	protein tyrosine phosphatase non-receptor type 11		702	0.385	0.923	0.99998	0.04		1	4	1	2016	2019
Colorectal Carcinoma	C0009402	PTPN13	5783	Q12923	protein tyrosine phosphatase non-receptor type 13		77	0.592	0.654	1.4172e-25	0.04		1	4	1	2005	2017
Colorectal Carcinoma	C0009402	PTPRC	5788	P08575	protein tyrosine phosphatase receptor type C	Enzyme	366	0.435	0.808	1	0.04		1	4	0	2007	2017
Colorectal Carcinoma	C0009402	PTPRZ1	5803	P23471	protein tyrosine phosphatase receptor type Z1	Enzyme	61	0.623	0.615	0.98997	0.04		1	4	0	1999	2016
Colorectal Carcinoma	C0009402	PVR	5817	P15151	PVR cell adhesion molecule		177	0.51	0.769	3.922e-10	0.04		1	4	0	2001	2019
Colorectal Carcinoma	C0009402	CXCL16	58191	Q9H2A7	C-X-C motif chemokine ligand 16	Signaling	178	0.502	0.769	3.4546e-05	0.04		0.75	4	0	2007	2019
Colorectal Carcinoma	C0009402	MOK	5891	Q9UQ07	MOK protein kinase	Kinase	251	0.476	0.769	8.8397e-22	0.04		0.75	4	2	2011	2019
Colorectal Carcinoma	C0009402	RARA	5914	P10276	retinoic acid receptor alpha	Nuclear receptor	274	0.47	0.846	0.96305	0.04		1	4	0	2004	2018
Colorectal Carcinoma	C0009402	BCL2L1	598	Q07817	BCL2 like 1	Signaling	212	0.493	0.885	0.93667	0.04		1	4	0	2000	2015
Colorectal Carcinoma	C0009402	RNH1	6050	P13489	ribonuclease/angiogenin inhibitor 1	Transcription factor	90	0.569	0.731	2.5541e-10	0.04		0.75	4	0	2006	2019
Colorectal Carcinoma	C0009402	MIR483	619552		microRNA 483		122	0.537	0.769		0.04		1	4	0	2016	2020
Colorectal Carcinoma	C0009402	SAT1	6303	P21673	spermidine/spermine N1-acetyltransferase 1		135	0.539	0.808	0.8706	0.04		1	4	0	2006	2018
Colorectal Carcinoma	C0009402	BGN	633	P21810	biglycan		253	0.484	0.808	0.45229	0.04		0.75	4	0	2012	2019
Colorectal Carcinoma	C0009402	SELP	6403	P16109	selectin P		293	0.46	0.769	5.0448e-32	0.04		1	4	0	2016	2019
Colorectal Carcinoma	C0009402	MAP2K4	6416	P45985	mitogen-activated protein kinase kinase 4	Kinase	100	0.559	0.692	0.99709	0.04		1	4	2	2009	2019
Colorectal Carcinoma	C0009402	SHMT2	6472	P34897	serine hydroxymethyltransferase 2	Enzyme	54	0.621	0.5	7.8195e-08	0.04		1	4	0	2013	2019
Colorectal Carcinoma	C0009402	DEPTOR	64798	Q8TB45	DEP domain containing MTOR interacting protein	Enzyme modulator	57	0.626	0.654	3.7245e-12	0.04		0.75	4	0	2014	2018
Colorectal Carcinoma	C0009402	MARCKSL1	65108	P49006	MARCKS like 1		169	0.508	0.731	0.014253	0.04		1	4	0	1996	1999
Colorectal Carcinoma	C0009402	CXADRP1	653108		CXADR pseudogene 1		272	0.463	0.846		0.04		1	4	0	1996	2018
Colorectal Carcinoma	C0009402	BMP7	655	P18075	bone morphogenetic protein 7	Signaling	197	0.498	0.769	0.12727	0.04		1	4	0	2008	2019
Colorectal Carcinoma	C0009402	SLC16A1	6566	P53985	solute carrier family 16 member 1	Transporter	195	0.499	0.846	0.00073565	0.04		1	4	2	2015	2019
Colorectal Carcinoma	C0009402	SMO	6608	Q99835	smoothened, frizzled class receptor	G-protein coupled receptor	215	0.489	0.731	4.2771e-07	0.04		0.75	4	0	2012	2014
Colorectal Carcinoma	C0009402	SPG7	6687	Q9UQ90	SPG7 matrix AAA peptidase subunit, paraplegin	Enzyme	419	0.436	0.885	1.9683e-36	0.04		1	4	0	1996	2018
Colorectal Carcinoma	C0009402	SSRP1	6749	Q08945	structure specific recognition protein 1		86	0.575	0.731	0.99585	0.04		1	4	0	2019	2019
Colorectal Carcinoma	C0009402	HNF1A	6927	P20823	HNF1 homeobox A	Nucleic acid binding	292	0.478	0.846	0.96115	0.04		1	4	0	1997	2020
Colorectal Carcinoma	C0009402	MIR574	693159		microRNA 574		71	0.599	0.577		0.04		1	4	0	2013	2019
Colorectal Carcinoma	C0009402	MIR582	693167		microRNA 582		47	0.636	0.5		0.04		1	4	0	2015	2019
Colorectal Carcinoma	C0009402	MIR590	693175		microRNA 590		99	0.553	0.692		0.04		0.75	4	0	2016	2018
Colorectal Carcinoma	C0009402	MIR638	693223		microRNA 638		48	0.636	0.462		0.04		1	4	0	2014	2017
Colorectal Carcinoma	C0009402	TCF21	6943	O43680	transcription factor 21		143	0.537	0.692	0.82553	0.04		1	4	0	2016	2018
Colorectal Carcinoma	C0009402	TEK	7010	Q02763	TEK receptor tyrosine kinase	Kinase	300	0.462	0.692	1	0.04		1	4	0	2004	2019
Colorectal Carcinoma	C0009402	TFAP4	7023	Q01664	transcription factor AP-4		18	0.751	0.231	0.99731	0.04		1	4	0	2013	2018
Colorectal Carcinoma	C0009402	TFDP1	7027	Q14186	transcription factor Dp-1	Nucleic acid binding	56	0.623	0.692	0.97174	0.04		1	4	0	2014	2019
Colorectal Carcinoma	C0009402	TFPI	7035	P10646	tissue factor pathway inhibitor	Enzyme modulator	230	0.486	0.808	0.2477	0.04		1	4	0	1997	2018
Colorectal Carcinoma	C0009402	TGFB2	7042	P61812	transforming growth factor beta 2	Signaling	389	0.433	0.885	0.99905	0.04		1	4	0	2018	2019
Colorectal Carcinoma	C0009402	TLR3	7098	O15455	toll like receptor 3	Receptor	393	0.427	0.885	1.6349e-07	0.04		1	4	1	2009	2019
Colorectal Carcinoma	C0009402	TSPAN8	7103	P19075	tetraspanin 8		63	0.617	0.577	0.0055131	0.04		1	4	0	2017	2020
Colorectal Carcinoma	C0009402	TPI1	7167	P60174	triosephosphate isomerase 1	Enzyme	184	0.517	0.846	0.030193	0.04		1	4	0	2009	2019
Colorectal Carcinoma	C0009402	MIR650	723778		microRNA 650		35	0.67	0.577		0.04		1	4	0	2011	2018
Colorectal Carcinoma	C0009402	UCHL1	7345	P09936	ubiquitin C-terminal hydrolase L1	Enzyme	260	0.482	0.885	0.99095	0.04		1	4	0	2007	2016
Colorectal Carcinoma	C0009402	UGT2B7	7364	P16662	UDP glucuronosyltransferase family 2 member B7		53	0.647	0.5	1.191e-13	0.04		1	4	2	2009	2019
Colorectal Carcinoma	C0009402	VHL	7428	P40337	von Hippel-Lindau tumor suppressor	Enzyme	372	0.443	0.846	0.079515	0.04		0.75	4	0	1996	2019
Colorectal Carcinoma	C0009402	XPA	7507	P23025	XPA, DNA damage recognition and repair factor	Nucleic acid binding	209	0.52	0.846	7.8652e-05	0.04		1	4	1	2007	2018
Colorectal Carcinoma	C0009402	XRCC4	7518	Q13426	X-ray repair cross complementing 4		192	0.528	0.769	8.2774e-07	0.04		1	4	6	2010	2019
Colorectal Carcinoma	C0009402	PRDM2	7799	Q13029	PR/SET domain 2		115	0.545	0.769	0.99996	0.04		1	4	1	2000	2009
Colorectal Carcinoma	C0009402	FTO	79068	Q9C0B1	FTO alpha-ketoglutarate dependent dioxygenase		286	0.486	0.885	8.364e-08	0.04		0.5	4	1	2012	2019
Colorectal Carcinoma	C0009402	CDC73	79577	Q6P1J9	cell division cycle 73		144	0.543	0.615	0.99995	0.04		1	4	0	2011	2017
Colorectal Carcinoma	C0009402	WLS	79971	Q5T9L3	Wnt ligand secretion mediator		166	0.513	0.731	0.020463	0.04		1	4	0	1996	1999
Colorectal Carcinoma	C0009402	FAM172A	83989	Q8WUF8	family with sequence similarity 172 member A		13	0.792	0.192	0.00024392	0.04		1	4	0	2016	2017
Colorectal Carcinoma	C0009402	CASP7	840	P55210	caspase 7	Enzyme	83	0.581	0.654	5.3589e-05	0.04		1	4	0	2011	2019
Colorectal Carcinoma	C0009402	RECK	8434	O95980	reversion inducing cysteine rich protein with kazal motifs	Enzyme modulator	123	0.547	0.731	1.9319e-10	0.04		1	4	0	2004	2019
Colorectal Carcinoma	C0009402	CUL4A	8451	Q13619	cullin 4A	Enzyme	79	0.597	0.654	0.99999	0.04		1	4	0	2017	2018
Colorectal Carcinoma	C0009402	KISS1R	84634	Q969F8	KISS1 receptor	G-protein coupled receptor	195	0.515	0.769	0.43649	0.04		1	4	0	2014	2019
Colorectal Carcinoma	C0009402	IFITM1	8519	P13164	interferon induced transmembrane protein 1		63	0.626	0.5	0.13569	0.04		1	4	0	2011	2016
Colorectal Carcinoma	C0009402	PDE5A	8654	O76074	phosphodiesterase 5A		187	0.513	0.731	0.00010643	0.04		1	4	0	2012	2019
Colorectal Carcinoma	C0009402	CBR1	873	P16152	carbonyl reductase 1		100	0.572	0.654	6.2783e-05	0.04		1	4	0	2005	2019
Colorectal Carcinoma	C0009402	RIPK1	8737	Q13546	receptor interacting serine/threonine kinase 1	Kinase	250	0.479	0.769	0.0079441	0.04		1	4	0	2011	2018
Colorectal Carcinoma	C0009402	TNFSF9	8744	P41273	TNF superfamily member 9		90	0.579	0.692	0.31823	0.04		1	4	0	2015	2019
Colorectal Carcinoma	C0009402	FADD	8772	Q13158	Fas associated via death domain		137	0.537	0.846	0.52595	0.04		1	4	0	2004	2018
Colorectal Carcinoma	C0009402	INPP4B	8821	O15327	inositol polyphosphate-4-phosphatase type II B		90	0.573	0.577	0.55218	0.04		1	4	0	2017	2020
Colorectal Carcinoma	C0009402	NRP1	8829	O14786	neuropilin 1		246	0.476	0.808	0.98584	0.04		1	4	0	2012	2019
Colorectal Carcinoma	C0009402	CCN6	8838	O95389	cellular communication network factor 6	Signaling	126	0.568	0.731	0.00061942	0.04		0.75	4	0	2001	2016
Colorectal Carcinoma	C0009402	HDAC3	8841	O15379	histone deacetylase 3	Epigenetic regulator	179	0.511	0.731	0.56737	0.04		1	4	0	2016	2018
Colorectal Carcinoma	C0009402	PER3	8863	P56645	period circadian regulator 3	Transcription factor	122	0.559	0.731	1.3661e-17	0.04		0.75	4	0	2013	2017
Colorectal Carcinoma	C0009402	WNT3A	89780	P56704	Wnt family member 3A	Signaling	141	0.532	0.769	0.96491	0.04		0.75	4	0	2010	2019
Colorectal Carcinoma	C0009402	LATS1	9113	O95835	large tumor suppressor kinase 1	Kinase	99	0.563	0.731	0.99987	0.04		0.75	4	0	2013	2018
Colorectal Carcinoma	C0009402	SLC16A4	9122	O15374	solute carrier family 16 member 4	Transporter	114	0.55	0.731	9.6707e-08	0.04		1	4	0	2018	2019
Colorectal Carcinoma	C0009402	HGS	9146	O14964	hepatocyte growth factor-regulated tyrosine kinase substrate		74	0.597	0.808	0.0063571	0.04		1	4	0	2006	2016
Colorectal Carcinoma	C0009402	LPAR2	9170	Q9HBW0	lysophosphatidic acid receptor 2	G-protein coupled receptor	285	0.463	0.846	0.036658	0.04		1	4	0	2004	2018
Colorectal Carcinoma	C0009402	ARHGEF2	9181	Q92974	Rho/Rac guanine nucleotide exchange factor 2		205	0.502	0.769	1	0.04		0.75	4	0	2013	2019
Colorectal Carcinoma	C0009402	NOLC1	9221	Q14978	nucleolar and coiled-body phosphoprotein 1		47	0.641	0.615	0.00010396	0.04		1	4	0	2004	2014
Colorectal Carcinoma	C0009402	SOCS6	9306	O14544	suppressor of cytokine signaling 6	Enzyme modulator	57	0.631	0.615	0.98865	0.04		1	4	0	2005	2018
Colorectal Carcinoma	C0009402	RPH3AL	9501	Q9UNE2	rabphilin 3A like (without C2 domains)		17	0.736	0.308	4.4376e-12	0.04		1	4	0	2003	2017
Colorectal Carcinoma	C0009402	PTGES	9536	O14684	prostaglandin E synthase		150	0.54	0.769	0.71317	0.04		1	4	0	2003	2015
Colorectal Carcinoma	C0009402	CD47	961	Q08722	CD47 molecule		253	0.468	0.769	0.91924	0.04		0.75	4	1	2009	2019
Colorectal Carcinoma	C0009402	CDA	978	P32320	cytidine deaminase	Enzyme	103	0.558	0.731	0.0081038	0.04		1	4	0	1996	2018
Colorectal Carcinoma	C0009402	AKT3	10000	Q9Y243	AKT serine/threonine kinase 3	Kinase	183	0.512	0.808	0.99958	0.03		1	3	1	2017	2018
Colorectal Carcinoma	C0009402	MIR675	100033819		microRNA 675		69	0.595	0.654		0.03		1	3	1	2010	2020
Colorectal Carcinoma	C0009402	ABI1	10006	Q8IZP0	abl interactor 1	Enzyme modulator	56	0.641	0.538	0.63911	0.03		1	3	0	2012	2014
Colorectal Carcinoma	C0009402	MIR147B	100126311		microRNA 147b		20	0.736	0.423		0.03		1	3	0	2014	2019
Colorectal Carcinoma	C0009402	MIR885	100126334		microRNA 885		70	0.597	0.615		0.03		1	3	0	2017	2019
Colorectal Carcinoma	C0009402	MIR874	100126343		microRNA 874		53	0.628	0.577		0.03		1	3	0	2016	2017
Colorectal Carcinoma	C0009402	HDAC6	10013	Q9UBN7	histone deacetylase 6	Epigenetic regulator	288	0.465	0.846	1	0.03		1	3	0	2018	2019
Colorectal Carcinoma	C0009402	MIR1246	100302142		microRNA 1246		76	0.592	0.808		0.03		1	3	0	2016	2019
Colorectal Carcinoma	C0009402	MIR761	100313892		microRNA 761		34	0.682	0.308		0.03		1	3	0	2018	2019
Colorectal Carcinoma	C0009402	MIR1260B	100422991		microRNA 1260b		21	0.711	0.423		0.03		1	3	0	2016	2019
Colorectal Carcinoma	C0009402	LINC01672	100505887		long intergenic non-protein coding RNA 1672		268	0.462	0.846		0.03		1	3	0	2017	2019
Colorectal Carcinoma	C0009402	HOTAIRM1	100506311		HOXA transcript antisense RNA, myeloid-specific 1		46	0.638	0.538		0.03		1	3	0	2016	2019
Colorectal Carcinoma	C0009402	GJC1	10052	P36383	gap junction protein gamma 1	Cell-cell junction	26	0.722	0.385	0.98795	0.03		1	3	0	2011	2011
Colorectal Carcinoma	C0009402	UBA2	10054	Q9UBT2	ubiquitin like modifier activating enzyme 2	Enzyme	26	0.705	0.346	0.99851	0.03		1	3	0	2017	2018
Colorectal Carcinoma	C0009402	SPRY4-IT1	100642175		SPRY4 intronic transcript 1		53	0.619	0.462		0.03		1	3	0	2017	2017
Colorectal Carcinoma	C0009402	HUWE1	10075	Q7Z6Z7	HECT, UBA and WWE domain containing E3 ubiquitin protein ligase 1	Enzyme	198	0.534	0.769	1	0.03		1	3	1	2005	2019
Colorectal Carcinoma	C0009402	PRNCR1	101867536		prostate cancer associated non-coding RNA 1		21	0.722	0.385		0.03		1	3	2	2013	2019
Colorectal Carcinoma	C0009402	ROR1-AS1	101927034		ROR1 antisense RNA 1		19	0.751	0.192		0.03		1	3	0	2019	2019
Colorectal Carcinoma	C0009402	CDK5	1020	Q00535	cyclin dependent kinase 5	Kinase	204	0.495	0.846	0.13892	0.03		1	3	0	2016	2019
Colorectal Carcinoma	C0009402	GDF11	10220	O95390	growth differentiation factor 11	Signaling	86	0.584	0.692	0.97645	0.03		0.667	3	0	2007	2019
Colorectal Carcinoma	C0009402	GPA33	10223	Q99795	glycoprotein A33		15	0.769	0.154	3.5516e-06	0.03		1	3	0	2015	2018
Colorectal Carcinoma	C0009402	MSLN	10232	Q13421	mesothelin	Extracellular structure	146	0.525	0.692	5.8751e-25	0.03		1	3	0	2017	2019
Colorectal Carcinoma	C0009402	SIK1B	102724428	A0A0B4J2F2;P57059	salt inducible kinase 1B (putative)		48	0.653	0.385		0.03		1	3	0	2016	2019
Colorectal Carcinoma	C0009402	ADAR	103	P55265	adenosine deaminase RNA specific	Enzyme	256	0.501	0.808	0.026282	0.03		1	3	0	2018	2019
Colorectal Carcinoma	C0009402	CNPY2	10330	Q9Y2B0	canopy FGF signaling regulator 2		35	0.691	0.385	0.0029232	0.03		1	3	1	2016	2018
Colorectal Carcinoma	C0009402	CDR1-AS	103611090		CDR1 antisense RNA		51	0.623	0.654		0.03		1	3	0	2017	2018
Colorectal Carcinoma	C0009402	TUBB3	10381	Q13509	tubulin beta 3 class III	Cellular structure	259	0.486	0.808	2.5676e-10	0.03		1	3	0	2016	2019
Colorectal Carcinoma	C0009402	ANAPC10	10393	Q9UM13	anaphase promoting complex subunit 10	Enzyme	24	0.78	0.308	0.0055077	0.03		1	3	0	2003	2005
Colorectal Carcinoma	C0009402	SPON2	10417	Q9BUD6	spondin 2	Extracellular structure	34	0.705	0.577	2.6609e-15	0.03		1	3	0	2015	2017
Colorectal Carcinoma	C0009402	CARM1	10498	Q86X55	coactivator associated arginine methyltransferase 1	Epigenetic regulator	79	0.601	0.692	0.99998	0.03		1	3	0	2010	2017
Colorectal Carcinoma	C0009402	MRPL28	10573	Q13084	mitochondrial ribosomal protein L28		178	0.505	0.731	1.9955e-07	0.03		1	3	0	2001	2017
Colorectal Carcinoma	C0009402	ST6GALNAC2	10610	Q9UJ37	ST6 N-acetylgalactosaminide alpha-2,6-sialyltransferase 2		17	0.78	0.308	7.472e-15	0.03		1	3	0	2016	2017
Colorectal Carcinoma	C0009402	CTCF	10664	P49711	CCCTC-binding factor	Transcription factor	186	0.504	0.769	0.99994	0.03		1	3	0	2001	2017
Colorectal Carcinoma	C0009402	GNA13	10672	Q14344	G protein subunit alpha 13	Enzyme modulator	46	0.656	0.538	0.86735	0.03		1	3	0	2014	2019
Colorectal Carcinoma	C0009402	MTHFD2	10797	P13995	methylenetetrahydrofolate dehydrogenase (NADP+ dependent) 2, methenyltetrahydrofolate cyclohydrolase	Enzyme	37	0.666	0.423	0.0023975	0.03		1	3	0	2019	2019
Colorectal Carcinoma	C0009402	HPSE	10855	Q9Y251	heparanase	Enzyme	393	0.425	0.808	2.266e-14	0.03		1	3	0	2004	2019
Colorectal Carcinoma	C0009402	FGL2	10875	Q14314	fibrinogen like 2	Signaling	63	0.621	0.615	6.1472e-05	0.03		1	3	0	2014	2019
Colorectal Carcinoma	C0009402	CEACAM8	1088	P31997	CEA cell adhesion molecule 8		29	0.682	0.538	3.3021e-07	0.03		1	3	0	2016	2019
Colorectal Carcinoma	C0009402	TOMM34	10953	Q15785	translocase of outer mitochondrial membrane 34		26	0.711	0.308	0.014459	0.03		1	3	0	2008	2018
Colorectal Carcinoma	C0009402	RAB40B	10966	Q12829	RAB40B, member RAS oncogene family		99	0.563	0.731	8.6559e-06	0.03		1	3	0	2004	2018
Colorectal Carcinoma	C0009402	CKAP4	10970	Q07065	cytoskeleton associated protein 4		332	0.436	0.731	0.50863	0.03		1	3	0	2006	2019
Colorectal Carcinoma	C0009402	KIF2C	11004	Q99661	kinesin family member 2C	Cellular structure	39	0.666	0.308	2.5765e-05	0.03		1	3	1	2008	2013
Colorectal Carcinoma	C0009402	ADAMTS5	11096	Q9UNA0	ADAM metallopeptidase with thrombospondin type 1 motif 5	Enzyme	85	0.597	0.654	8.0325e-07	0.03		1	3	0	2015	2018
Colorectal Carcinoma	C0009402	CHGA	1113	P10645	chromogranin A		218	0.49	0.808	0.030369	0.03		1	3	0	2010	2017
Colorectal Carcinoma	C0009402	AKAP10	11216	O43572	A-kinase anchoring protein 10		28	0.76	0.308	0.10782	0.03		1	3	2	2009	2015
Colorectal Carcinoma	C0009402	GALNT6	11226	Q8NCL4	polypeptide N-acetylgalactosaminyltransferase 6	Enzyme	33	0.691	0.269	1.4162e-09	0.03		1	3	0	2016	2018
Colorectal Carcinoma	C0009402	PADI2	11240	Q9Y2J8	peptidyl arginine deiminase 2		67	0.61	0.615	4.9471e-11	0.03		1	3	0	2016	2019
Colorectal Carcinoma	C0009402	SLC46A1	113235	Q96NT5	solute carrier family 46 member 1	Transporter	97	0.606	0.731	0.021858	0.03		1	3	0	2015	2018
Colorectal Carcinoma	C0009402	CISH	1154	Q9NSE2	cytokine inducible SH2 containing protein	Enzyme modulator	195	0.5	0.808	0.00053852	0.03		1	3	0	2011	2018
Colorectal Carcinoma	C0009402	H3P9	115482684		H3 histone pseudogene 9		177	0.505	0.731		0.03		1	3	0	2001	2017
Colorectal Carcinoma	C0009402	ARL11	115761	Q969Q4	ADP ribosylation factor like GTPase 11		35	0.67	0.423	0.0052678	0.03		1	3	5	2006	2008
Colorectal Carcinoma	C0009402	CKS1B	1163	P61024	CDC28 protein kinase regulatory subunit 1B	Enzyme modulator	78	0.587	0.654	0.4314	0.03		1	3	0	2004	2019
Colorectal Carcinoma	C0009402	ANIB1	116833		aneurysm, intracranial berry 1		62	0.608	0.5		0.03		1	3	0	2005	2020
Colorectal Carcinoma	C0009402	CYP2R1	120227	Q6VVX0	cytochrome P450 family 2 subfamily R member 1		139	0.563	0.731	3.793e-10	0.03		0.667	3	2	2014	2016
Colorectal Carcinoma	C0009402	CCR1	1230	P32246	C-C motif chemokine receptor 1	G-protein coupled receptor	192	0.531	0.769	0.38775	0.03		1	3	0	2012	2017
Colorectal Carcinoma	C0009402	ZG16B	124220	Q96DA0	zymogen granule protein 16B		23	0.736	0.308	0.00029994	0.03		1	3	1	2013	2019
Colorectal Carcinoma	C0009402	COL1A1	1277	P02452	collagen type I alpha 1 chain		487	0.43	0.808	1	0.03		1	3	0	2018	2018
Colorectal Carcinoma	C0009402	COMT	1312	P21964	catechol-O-methyltransferase	Enzyme	622	0.4	0.923	1.1377e-06	0.03		0.667	3	1	2014	2019
Colorectal Carcinoma	C0009402	CPT1A	1374	P50416	carnitine palmitoyltransferase 1A	Enzyme	143	0.555	0.808	5.114e-09	0.03		1	3	0	2007	2018
Colorectal Carcinoma	C0009402	ADHFE1	137872	Q8IWW8	alcohol dehydrogenase iron containing 1		16	0.76	0.346	8.5168e-09	0.03		1	3	0	2013	2019
Colorectal Carcinoma	C0009402	ATF2	1386	P15336	activating transcription factor 2	Transcription factor	122	0.551	0.808	0.99131	0.03		1	3	0	2012	2019
Colorectal Carcinoma	C0009402	CRIP1	1396	P50238	cysteine rich protein 1	Cellular structure	37	0.666	0.577	0.00049848	0.03		1	3	0	2017	2019
Colorectal Carcinoma	C0009402	CSK	1445	P41240	C-terminal Src kinase	Kinase	91	0.606	0.692	0.99977	0.03		1	3	0	2001	2005
Colorectal Carcinoma	C0009402	VCAN	1462	P13611	versican	Extracellular structure	205	0.497	0.808	1	0.03		1	3	0	2016	2017
Colorectal Carcinoma	C0009402	CTNND1	1500	O60716	catenin delta 1	Cellular structure	196	0.5	0.808	0.99999	0.03		1	3	0	2005	2019
Colorectal Carcinoma	C0009402	SIK1	150094	A0A0B4J2F2;P57059	salt inducible kinase 1	Kinase	157	0.544	0.731	0.93716	0.03		1	3	0	2016	2019
Colorectal Carcinoma	C0009402	PLB1	151056	Q6P1J6	phospholipase B1		219	0.488	0.846	1.7315e-72	0.03		1	3	0	1995	2005
Colorectal Carcinoma	C0009402	SGO1	151648	Q5FBB7	shugoshin 1		41	0.674	0.346	2.5902e-12	0.03		1	3	0	2009	2013
Colorectal Carcinoma	C0009402	ADRB2	154	P07550	adrenoceptor beta 2	G-protein coupled receptor	387	0.442	0.923	0.52545	0.03		1	3	0	1992	2019
Colorectal Carcinoma	C0009402	CYP3A4	1576	P08684	cytochrome P450 family 3 subfamily A member 4	Enzyme	291	0.462	0.885	5.7979e-11	0.03		1	3	0	2002	2011
Colorectal Carcinoma	C0009402	DACH1	1602	Q9UI36	dachshund family transcription factor 1	Transcription factor	74	0.604	0.538	0.99954	0.03		1	3	0	2013	2017
Colorectal Carcinoma	C0009402	DAP	1611	P51397	death associated protein	Enzyme modulator	144	0.53	0.808	0.0035018	0.03		1	3	0	2003	2014
Colorectal Carcinoma	C0009402	DDX5	1655	P17844	DEAD-box helicase 5		77	0.592	0.692	0.99998	0.03		1	3	0	2018	2019
Colorectal Carcinoma	C0009402	RASSF6	166824	Q6ZTQ3	Ras association domain family member 6	Enzyme modulator	53	0.626	0.654	2.7376e-26	0.03		1	3	0	2016	2020
Colorectal Carcinoma	C0009402	GSDME	1687	O60443	gasdermin E		44	0.656	0.423	3.2843e-09	0.03		1	3	0	2008	2019
Colorectal Carcinoma	C0009402	DMBT1	1755	Q9UGM3	deleted in malignant brain tumors 1	Enzyme	135	0.533	0.654	4.476e-63	0.03		0.667	3	0	2005	2018
Colorectal Carcinoma	C0009402	DNASE1	1773	P24855	deoxyribonuclease 1		180	0.505	0.846	6.9801e-21	0.03		1	3	0	2000	2018
Colorectal Carcinoma	C0009402	DSC2	1824	Q02487	desmocollin 2	Cell adhesion	81	0.61	0.538	5.1749e-08	0.03		1	3	0	2011	2019
Colorectal Carcinoma	C0009402	DUSP5	1847	Q16690	dual specificity phosphatase 5		78	0.597	0.654	0.0033227	0.03		1	3	0	2017	2018
Colorectal Carcinoma	C0009402	E2F5	1875	Q15329	E2F transcription factor 5	Nucleic acid binding	31	0.686	0.308	0.935	0.03		1	3	0	2007	2019
Colorectal Carcinoma	C0009402	EDNRA	1909	P25101	endothelin receptor type A	G-protein coupled receptor	427	0.426	0.885	0.99158	0.03		1	3	0	2015	2018
Colorectal Carcinoma	C0009402	EEF1G	1937	P26641	eukaryotic translation elongation factor 1 gamma		21	0.736	0.192	0.99967	0.03		1	3	0	1993	2013
Colorectal Carcinoma	C0009402	AHR	196	P35869	aryl hydrocarbon receptor	Transcription factor	532	0.41	0.923	0.99999	0.03		0.667	3	0	2011	2017
Colorectal Carcinoma	C0009402	CTTN	2017	Q14247	cortactin	Cellular structure	124	0.546	0.769	0.089176	0.03		1	3	0	2014	2017
Colorectal Carcinoma	C0009402	ENG	2022	P17813	endoglin		371	0.446	0.846	0.99858	0.03		1	3	0	2016	2018
Colorectal Carcinoma	C0009402	EPO	2056	P01588	erythropoietin		646	0.381	0.885	0.01125	0.03		1	3	0	2013	2018
Colorectal Carcinoma	C0009402	ERN1	2081	O75460	endoplasmic reticulum to nucleus signaling 1	Kinase	163	0.513	0.808	0.99027	0.03		1	3	0	2017	2019
Colorectal Carcinoma	C0009402	MECOM	2122	Q03112	MDS1 and EVI1 complex locus		191	0.513	0.731	1	0.03		1	3	0	2013	2017
Colorectal Carcinoma	C0009402	EWSR1	2130	Q01844	EWS RNA binding protein 1	Nucleic acid binding	251	0.474	0.692	0.99981	0.03		1	3	0	2006	2019
Colorectal Carcinoma	C0009402	F7	2155	P08709	coagulation factor VII	Enzyme	99	0.623	0.615	1.349e-05	0.03		1	3	0	2010	2019
Colorectal Carcinoma	C0009402	F9	2158	P00740	coagulation factor IX	Enzyme	276	0.465	0.885	0.99776	0.03		1	3	0	2008	2017
Colorectal Carcinoma	C0009402	ADGRF5	221395	Q8IZF2	adhesion G protein-coupled receptor F5	G-protein coupled receptor	21	0.78	0.308	0.023976	0.03		1	3	0	2017	2019
Colorectal Carcinoma	C0009402	FGA	2243	P02671	fibrinogen alpha chain		118	0.573	0.769	1.2236e-13	0.03		1	3	0	2011	2019
Colorectal Carcinoma	C0009402	FGF4	2249	P08620	fibroblast growth factor 4	Signaling	86	0.588	0.577	0.1406	0.03		1	3	0	1988	2018
Colorectal Carcinoma	C0009402	FGF9	2254	P31371	fibroblast growth factor 9	Signaling	153	0.528	0.846	0.94704	0.03		1	3	0	2008	2017
Colorectal Carcinoma	C0009402	FHL2	2274	Q14192	four and a half LIM domains 2	Transcription factor	121	0.556	0.731	2.8693e-05	0.03		1	3	0	2013	2017
[truncated: 3,475 more rows]

## Sheet: KEGG pathway analysis
Category	Term	Count	%	PValue	Genes	List Total	Pop Hits	Pop Total	Fold Enrichment	Bonferroni	Benjamini	FDR
KEGG_PATHWAY	hsa05200:Pathways in cancer	12	44.4444	3.97308e-08	GSK3B, AR, HSP90AA1, HSP90AB1, NOS2, CDK2, SLC2A1, BAX, PPARG, FOS, PTGS2, PIK3CG	26	393	6879	8.07868	5.40338e-06	5.40339e-06	4.41012e-06
KEGG_PATHWAY	hsa04917:Prolactin signaling pathway	7	25.9259	1.47983e-07	GSK3B, FOS, JAK2, MAPK14, ESR1, ESR2, PIK3CG	26	71	6879	26.085	2.01255e-05	1.00629e-05	8.21307e-06
KEGG_PATHWAY	hsa04915:Estrogen signaling pathway	7	25.9259	1.08296e-06	GABBR1, HSP90AA1, HSP90AB1, FOS, ESR1, ESR2, PIK3CG	26	99	6879	18.7075	0.000147272	4.90942e-05	4.00695e-05
KEGG_PATHWAY	hsa04914:Progesterone-mediated oocyte maturation	6	22.2222	1.25458e-05	CCNA2, HSP90AA1, HSP90AB1, CDK2, MAPK14, PIK3CG	26	87	6879	18.2467	0.00170479	0.000360923	0.000294577
KEGG_PATHWAY	hsa05215:Prostate cancer	6	22.2222	1.32692e-05	GSK3B, AR, HSP90AA1, HSP90AB1, CDK2, PIK3CG	26	88	6879	18.0393	0.001803	0.000360923	0.000294577
KEGG_PATHWAY	hsa04668:TNF signaling pathway	6	22.2222	3.4377e-05	VCAM1, FOS, MAPK14, PTGS2, SELE, PIK3CG	26	107	6879	14.8361	0.00466444	0.000779212	0.000635974
KEGG_PATHWAY	hsa05140:Leishmaniasis	5	18.5185	0.000111905	NOS2, FOS, JAK2, MAPK14, PTGS2	26	71	6879	18.6322	0.0151047	0.00217416	0.0017745
KEGG_PATHWAY	hsa04919:Thyroid hormone signaling pathway	5	18.5185	0.00071486	NCOA2, GSK3B, SLC2A1, ESR1, PIK3CG	26	115	6879	11.5033	0.092676	0.0121526	0.00991868
KEGG_PATHWAY	hsa04923:Regulation of lipolysis in adipocytes	4	14.8148	0.00103527	ADRB2, PTGS2, PIK3CG, PTGS1	26	56	6879	18.8984	0.131397	0.015644	0.0127683
KEGG_PATHWAY	hsa05210:Colorectal cancer	4	14.8148	0.00139231	GSK3B, BAX, FOS, PIK3CG	26	62	6879	17.0695	0.172616	0.0189355	0.0154547
KEGG_PATHWAY	hsa05161:Hepatitis B	5	18.5185	0.00169725	CCNA2, CDK2, BAX, FOS, PIK3CG	26	145	6879	9.12334	0.206278	0.0209842	0.0171268
KEGG_PATHWAY	hsa05166:HTLV-I infection	6	22.2222	0.00191047	GSK3B, VCAM1, SLC2A1, BAX, FOS, PIK3CG	26	254	6879	6.24985	0.229005	0.021652	0.0176719
KEGG_PATHWAY	hsa05222:Small cell lung cancer	4	14.8148	0.00344132	NOS2, CDK2, PTGS2, PIK3CG	26	85	6879	12.4507	0.374264	0.0360015	0.0293836
KEGG_PATHWAY	hsa04660:T cell receptor signaling pathway	4	14.8148	0.00543538	GSK3B, FOS, MAPK14, PIK3CG	26	100	6879	10.5831	0.523472	0.0528009	0.0430948
KEGG_PATHWAY	hsa05142:Chagas disease (American trypanosomiasis)	4	14.8148	0.006063	NOS2, FOS, MAPK14, PIK3CG	26	104	6879	10.176	0.562674	0.0549712	0.0448662
KEGG_PATHWAY	hsa04151:PI3K-Akt signaling pathway	6	22.2222	0.00713439	GSK3B, HSP90AA1, HSP90AB1, CDK2, JAK2, PIK3CG	26	345	6879	4.60134	0.622338	0.0606423	0.0494948
KEGG_PATHWAY	hsa04670:Leukocyte transendothelial migration	4	14.8148	0.00800726	VCAM1, F11R, MAPK14, PIK3CG	26	115	6879	9.20268	0.664915	0.0640581	0.0522827
KEGG_PATHWAY	hsa04722:Neurotrophin signaling pathway	4	14.8148	0.00899969	GSK3B, BAX, MAPK14, PIK3CG	26	120	6879	8.81923	0.707561	0.0673993	0.0550097
KEGG_PATHWAY	hsa05169:Epstein-Barr virus infection	4	14.8148	0.00941607	CCNA2, CDK2, MAPK14, PIK3CG	26	122	6879	8.67465	0.723806	0.0673993	0.0550097
KEGG_PATHWAY	hsa04380:Osteoclast differentiation	4	14.8148	0.0114293	PPARG, FOS, MAPK14, PIK3CG	26	131	6879	8.07868	0.790563	0.0771186	0.0629424
KEGG_PATHWAY	hsa05162:Measles	4	14.8148	0.011908	GSK3B, CDK2, JAK2, PIK3CG	26	133	6879	7.9572	0.803915	0.0771186	0.0629424
KEGG_PATHWAY	hsa04550:Signaling pathways regulating pluripotency of stem cells	4	14.8148	0.0136746	GSK3B, JAK2, MAPK14, PIK3CG	26	140	6879	7.55934	0.846272	0.0845337	0.0689944
KEGG_PATHWAY	hsa04621:NOD-like receptor signaling pathway	3	11.1111	0.0173212	HSP90AA1, HSP90AB1, MAPK14	26	56	6879	14.1738	0.907109	0.102421	0.0835938
KEGG_PATHWAY	hsa04370:VEGF signaling pathway	3	11.1111	0.0203568	MAPK14, PTGS2, PIK3CG	26	61	6879	13.012	0.939013	0.115355	0.0941504
KEGG_PATHWAY	hsa05164:Influenza A	4	14.8148	0.0243134	GSK3B, JAK2, MAPK14, PIK3CG	26	174	6879	6.08223	0.964827	0.12915	0.105409
KEGG_PATHWAY	hsa05152:Tuberculosis	4	14.8148	0.0254183	NOS2, BAX, JAK2, MAPK14	26	177	6879	5.97914	0.96985	0.12915	0.105409
KEGG_PATHWAY	hsa04662:B cell receptor signaling pathway	3	11.1111	0.02564	GSK3B, FOS, PIK3CG	26	69	6879	11.5033	0.970769	0.12915	0.105409
KEGG_PATHWAY	hsa05133:Pertussis	3	11.1111	0.0299302	NOS2, FOS, MAPK14	26	75	6879	10.5831	0.98396	0.145375	0.118652
KEGG_PATHWAY	hsa04024:cAMP signaling pathway	4	14.8148	0.0339106	GABBR1, FOS, ADRB2, PIK3CG	26	198	6879	5.34499	0.99083	0.159029	0.129796
KEGG_PATHWAY	hsa05132:Salmonella infection	3	11.1111	0.0360628	NOS2, FOS, MAPK14	26	83	6879	9.56302	0.993229	0.162475	0.132609
KEGG_PATHWAY	hsa05203:Viral carcinogenesis	4	14.8148	0.0370348	CCNA2, CDK2, BAX, PIK3CG	26	205	6879	5.16248	0.994097	0.162475	0.132609
KEGG_PATHWAY	hsa04066:HIF-1 signaling pathway	3	11.1111	0.0469634	NOS2, SLC2A1, PIK3CG	26	96	6879	8.26803	0.998558	0.199594	0.162904
KEGG_PATHWAY	hsa04620:Toll-like receptor signaling pathway	3	11.1111	0.0560712	FOS, MAPK14, PIK3CG	26	106	6879	7.48803	0.999609	0.22985	0.187598
KEGG_PATHWAY	hsa04931:Insulin resistance	3	11.1111	0.0579629	GSK3B, SLC2A1, PIK3CG	26	108	6879	7.34936	0.999703	0.22985	0.187598
KEGG_PATHWAY	hsa05145:Toxoplasmosis	3	11.1111	0.0598772	NOS2, JAK2, MAPK14	26	110	6879	7.21573	0.999775	0.22985	0.187598
KEGG_PATHWAY	hsa04725:Cholinergic synapse	3	11.1111	0.0608426	FOS, JAK2, PIK3CG	26	111	6879	7.15073	0.999804	0.22985	0.187598
KEGG_PATHWAY	hsa04071:Sphingolipid signaling pathway	3	11.1111	0.0697714	BAX, MAPK14, PIK3CG	26	120	6879	6.61442	0.999947	0.256457	0.209314
KEGG_PATHWAY	hsa04152:AMPK signaling pathway	3	11.1111	0.07284	CCNA2, PPARG, PIK3CG	26	123	6879	6.4531	0.999966	0.257607	0.210253
KEGG_PATHWAY	hsa04110:Cell cycle	3	11.1111	0.0738727	CCNA2, GSK3B, CDK2	26	124	6879	6.40105	0.999971	0.257607	0.210253
KEGG_PATHWAY	hsa04728:Dopaminergic synapse	3	11.1111	0.0780517	GSK3B, FOS, MAPK14	26	128	6879	6.20102	0.999984	0.265376	0.216593
KEGG_PATHWAY	hsa04611:Platelet activation	3	11.1111	0.0801693	MAPK14, PIK3CG, PTGS1	26	130	6879	6.10562	0.999988	0.265928	0.217044
KEGG_PATHWAY	hsa05160:Hepatitis C	3	11.1111	0.0833801	GSK3B, MAPK14, PIK3CG	26	133	6879	5.9679	0.999993	0.267127	0.218023
KEGG_PATHWAY	hsa04068:FoxO signaling pathway	3	11.1111	0.0844593	CDK2, MAPK14, PIK3CG	26	134	6879	5.92336	0.999994	0.267127	0.218023
KEGG_PATHWAY	hsa04514:Cell adhesion molecules (CAMs)	3	11.1111	0.0932481	VCAM1, F11R, SELE	26	142	6879	5.58965	0.999998	0.288222	0.23524
KEGG_PATHWAY	hsa04630:Jak-STAT signaling pathway	3	11.1111	0.0966122	PIM1, JAK2, PIK3CG	26	145	6879	5.47401	0.999999	0.291984	0.23831

## Sheet: GO analysis
Category	Term	Count	%	PValue	Genes	List Total	Pop Hits	Pop Total	Fold Enrichment	Bonferroni	Benjamini	FDR
GOTERM_BP_DIRECT	GO:0045429~positive regulation of nitric oxide biosynthetic process	5	18.5185	5.34786e-07	HSP90AA1, HSP90AB1, JAK2, PTGS2, ESR1	27	43	16792	72.317	0.000366796	0.000366863	0.000360446
GOTERM_BP_DIRECT	GO:0009409~response to cold	4	14.8148	2.27439e-05	HSP90AA1, PPARG, FOS, ADRB2	27	36	16792	69.1029	0.0154814	0.00780116	0.0076647
GOTERM_BP_DIRECT	GO:0009651~response to salt stress	3	11.1111	8.24402e-05	HSP90AA1, HSP90AB1, BAX	27	9	16792	207.309	0.0549867	0.0115811	0.0113785
GOTERM_BP_DIRECT	GO:0033160~positive regulation of protein import into nucleus, translocation	3	11.1111	0.000102952	HSP90AA1, HSP90AB1, JAK2	27	10	16792	186.578	0.0681923	0.0115811	0.0113785
GOTERM_BP_DIRECT	GO:0045893~positive regulation of transcription, DNA-templated	7	25.9259	0.000110279	CCNA2, AR, CDK2, PPARG, FOS, ESR1, ESR2	27	515	16792	8.45336	0.0728643	0.0115811	0.0113785
GOTERM_BP_DIRECT	GO:0032496~response to lipopolysaccharide	5	18.5185	0.000110878	VCAM1, FOS, JAK2, PTGS2, SELE	27	164	16792	18.9612	0.0732451	0.0115811	0.0113785
GOTERM_BP_DIRECT	GO:0050727~regulation of inflammatory response	4	14.8148	0.000123037	JAK2, PTGS2, SELE, ESR1	27	63	16792	39.4874	0.0809443	0.0115811	0.0113785
GOTERM_BP_DIRECT	GO:0043627~response to estrogen	4	14.8148	0.000135057	HSP90AA1, CA2, PPARG, ESR1	27	65	16792	38.2724	0.0884922	0.0115811	0.0113785
GOTERM_BP_DIRECT	GO:0071732~cellular response to nitric oxide	3	11.1111	0.0002074	CCNA2, CDK2, DPEP1	27	14	16792	133.27	0.132631	0.0158085	0.015532
GOTERM_BP_DIRECT	GO:0006954~inflammatory response	6	22.2222	0.000253796	FOS, F11R, PTGS2, SELE, PIK3CG, PTGS1	27	379	16792	9.84579	0.159809	0.0174104	0.0171058
GOTERM_BP_DIRECT	GO:0051091~positive regulation of sequence-specific DNA binding transcription factor activity	4	14.8148	0.000556309	PPARG, JAK2, ESR1, ESR2	27	105	16792	23.6924	0.317323	0.0320477	0.0314871
GOTERM_BP_DIRECT	GO:0045944~positive regulation of transcription from RNA polymerase II promoter	8	29.6296	0.0005606	NCOA2, GSK3B, AR, PPARG, FOS, ADRB2, MAPK14, ESR1	27	981	16792	5.07177	0.319331	0.0320477	0.0314871
GOTERM_BP_DIRECT	GO:0034612~response to tumor necrosis factor	3	11.1111	0.000676613	JAK2, PTGS2, SELE	27	25	16792	74.6311	0.371433	0.0357043	0.0350798
GOTERM_BP_DIRECT	GO:0001890~placenta development	3	11.1111	0.00132924	HSP90AB1, PPARG, MAPK14	27	35	16792	53.3079	0.598467	0.0651328	0.0639935
GOTERM_BP_DIRECT	GO:0045597~positive regulation of cell differentiation	3	11.1111	0.00148503	AR, HSP90AB1, JAK2	27	37	16792	50.4264	0.63922	0.0679154	0.0667273
GOTERM_BP_DIRECT	GO:0006367~transcription initiation from RNA polymerase II promoter	4	14.8148	0.00162272	AR, PPARG, ESR1, ESR2	27	152	16792	16.3665	0.671787	0.0695742	0.0683572
GOTERM_BP_DIRECT	GO:0008217~regulation of blood pressure	3	11.1111	0.0045162	PPARG, PTGS2, PTGS1	27	65	16792	28.7043	0.955181	0.182242	0.179054
GOTERM_BP_DIRECT	GO:0035690~cellular response to drug	3	11.1111	0.00507446	HSP90AB1, NOS2, DPEP1	27	69	16792	27.0403	0.969497	0.188425	0.185128
GOTERM_BP_DIRECT	GO:0007265~Ras protein signal transduction	3	11.1111	0.00521875	CCNA2, CDK2, MAPK14	27	70	16792	26.654	0.972386	0.188425	0.185128
GOTERM_BP_DIRECT	GO:1900034~regulation of cellular response to heat	3	11.1111	0.00596834	GSK3B, HSP90AA1, HSP90AB1	27	75	16792	24.877	0.983535	0.192691	0.189321
GOTERM_BP_DIRECT	GO:1900015~regulation of cytokine production involved in inflammatory response	2	7.40741	0.00617961	NOS2, MAPK14	27	4	16792	310.963	0.985769	0.192691	0.189321
GOTERM_BP_DIRECT	GO:0045986~negative regulation of smooth muscle contraction	2	7.40741	0.00617961	ADRB2, PTGS2	27	4	16792	310.963	0.985769	0.192691	0.189321
GOTERM_BP_DIRECT	GO:0006919~activation of cysteine-type endopeptidase activity involved in apoptotic process	3	11.1111	0.00726372	BAX, PPARG, JAK2	27	83	16792	22.4793	0.993269	0.213469	0.209735
GOTERM_BP_DIRECT	GO:0007165~signal transduction	7	25.9259	0.00748663	AR, HSP90AA1, PPARG, JAK2, MAPK14, ESR1, ESR2	27	1161	16792	3.74977	0.99423	0.213469	0.209735
GOTERM_BP_DIRECT	GO:0006928~movement of cell or subcellular component	3	11.1111	0.00777948	JAK2, MAPK14, PTGS2	27	86	16792	21.6951	0.995288	0.213469	0.209735
GOTERM_BP_DIRECT	GO:0090336~positive regulation of brown fat cell differentiation	2	7.40741	0.00925562	MAPK14, PTGS2	27	6	16792	207.309	0.998303	0.244206	0.239934
GOTERM_BP_DIRECT	GO:0006915~apoptotic process	5	18.5185	0.0106524	PIM1, BAX, DPEP1, JAK2, MAPK14	27	567	16792	5.48436	0.999355	0.270651	0.265917
GOTERM_BP_DIRECT	GO:0042493~response to drug	4	14.8148	0.0112244	HSP90AA1, PPARG, FOS, PTGS2	27	304	16792	8.18324	0.999566	0.274998	0.270188
GOTERM_BP_DIRECT	GO:0060068~vagina development	2	7.40741	0.0138525	BAX, ESR1	27	9	16792	138.206	0.99993	0.327683	0.321951
GOTERM_BP_DIRECT	GO:0019371~cyclooxygenase pathway	2	7.40741	0.0153802	PTGS2, PTGS1	27	10	16792	124.385	0.999976	0.329713	0.323946
GOTERM_BP_DIRECT	GO:0045793~positive regulation of cell size	2	7.40741	0.0153802	HSP90AA1, HSP90AB1	27	10	16792	124.385	0.999976	0.329713	0.323946
GOTERM_BP_DIRECT	GO:1901030~positive regulation of mitochondrial outer membrane permeabilization involved in apoptotic signaling pathway	2	7.40741	0.0153802	GSK3B, BAX	27	10	16792	124.385	0.999976	0.329713	0.323946
GOTERM_BP_DIRECT	GO:0018105~peptidyl-serine phosphorylation	3	11.1111	0.0158981	GSK3B, CDK2, MAPK14	27	125	16792	14.9262	0.999983	0.330487	0.324706
GOTERM_BP_DIRECT	GO:0043524~negative regulation of neuron apoptotic process	3	11.1111	0.0176193	HSP90AB1, BAX, JAK2	27	132	16792	14.1347	0.999995	0.342138	0.336153
GOTERM_BP_DIRECT	GO:0007204~positive regulation of cytosolic calcium ion concentration	3	11.1111	0.018125	JAK2, ESR1, PIK3CG	27	134	16792	13.9237	0.999996	0.342138	0.336153
GOTERM_BP_DIRECT	GO:0071498~cellular response to fluid shear stress	2	7.40741	0.0184288	CA2, PTGS2	27	12	16792	103.654	0.999997	0.342138	0.336153
GOTERM_BP_DIRECT	GO:0050901~leukocyte tethering or rolling	2	7.40741	0.0199498	VCAM1, SELE	27	13	16792	95.6809	0.999999	0.342138	0.336153
GOTERM_BP_DIRECT	GO:0097296~activation of cysteine-type endopeptidase activity involved in apoptotic signaling pathway	2	7.40741	0.0199498	BAX, JAK2	27	13	16792	95.6809	0.999999	0.342138	0.336153
GOTERM_BP_DIRECT	GO:0060334~regulation of interferon-gamma-mediated signaling pathway	2	7.40741	0.0199498	HSP90AB1, JAK2	27	13	16792	95.6809	0.999999	0.342138	0.336153
GOTERM_BP_DIRECT	GO:0032516~positive regulation of phosphoprotein phosphatase activity	2	7.40741	0.0199498	HSP90AB1, JAK2	27	13	16792	95.6809	0.999999	0.342138	0.336153
GOTERM_BP_DIRECT	GO:0001516~prostaglandin biosynthetic process	2	7.40741	0.0214684	PTGS2, PTGS1	27	14	16792	88.8466	1	0.350651	0.344517
GOTERM_BP_DIRECT	GO:0019395~fatty acid oxidation	2	7.40741	0.0214684	PPARG, MAPK14	27	14	16792	88.8466	1	0.350651	0.344517
GOTERM_BP_DIRECT	GO:0031396~regulation of protein ubiquitination	2	7.40741	0.0244989	HSP90AA1, HSP90AB1	27	16	16792	77.7407	1	0.38196	0.375279
GOTERM_BP_DIRECT	GO:0035994~response to muscle stretch	2	7.40741	0.0244989	FOS, MAPK14	27	16	16792	77.7407	1	0.38196	0.375279
GOTERM_BP_DIRECT	GO:0060749~mammary gland alveolus development	2	7.40741	0.0260108	AR, ESR1	27	17	16792	73.1678	1	0.39652	0.389583
GOTERM_BP_DIRECT	GO:0046777~protein autophosphorylation	3	11.1111	0.0288601	GSK3B, PIM1, JAK2	27	172	16792	10.8475	1	0.423681	0.41627
GOTERM_BP_DIRECT	GO:0045672~positive regulation of osteoclast differentiation	2	7.40741	0.0290277	CA2, FOS	27	19	16792	65.4659	1	0.423681	0.41627
GOTERM_BP_DIRECT	GO:0030520~intracellular estrogen receptor signaling pathway	2	7.40741	0.0320357	ESR1, ESR2	27	21	16792	59.231	1	0.443821	0.436058
GOTERM_BP_DIRECT	GO:0035902~response to immobilization stress	2	7.40741	0.0320357	PPARG, FOS	27	21	16792	59.231	1	0.443821	0.436058
GOTERM_BP_DIRECT	GO:0006468~protein phosphorylation	4	14.8148	0.0325602	GSK3B, PIM1, JAK2, PIK3CG	27	456	16792	5.45549	1	0.443821	0.436058
GOTERM_BP_DIRECT	GO:0042127~regulation of cell proliferation	3	11.1111	0.0329955	NOS2, JAK2, PTGS1	27	185	16792	10.0853	1	0.443821	0.436058
GOTERM_BP_DIRECT	GO:0035924~cellular response to vascular endothelial growth factor stimulus	2	7.40741	0.0350347	VCAM1, MAPK14	27	23	16792	54.0805	1	0.462189	0.454104
GOTERM_BP_DIRECT	GO:0007159~leukocyte cell-cell adhesion	2	7.40741	0.0380248	VCAM1, SELE	27	25	16792	49.7541	1	0.483056	0.474606
GOTERM_BP_DIRECT	GO:0051090~regulation of sequence-specific DNA binding transcription factor activity	2	7.40741	0.0380248	FOS, MAPK14	27	25	16792	49.7541	1	0.483056	0.474606
GOTERM_BP_DIRECT	GO:0042981~regulation of apoptotic process	3	11.1111	0.042635	BAX, JAK2, ESR1	27	213	16792	8.75952	1	0.531775	0.522473
GOTERM_BP_DIRECT	GO:0001525~angiogenesis	3	11.1111	0.0463062	MAPK14, PTGS2, PIK3CG	27	223	16792	8.36672	1	0.553604	0.54392
GOTERM_BP_DIRECT	GO:0071392~cellular response to estradiol stimulus	2	7.40741	0.0469417	CCNA2, ESR1	27	31	16792	40.1243	1	0.553604	0.54392
GOTERM_BP_DIRECT	GO:0050873~brown fat cell differentiation	2	7.40741	0.0484201	ADRB2, PTGS2	27	32	16792	38.8704	1	0.553604	0.54392
GOTERM_BP_DIRECT	GO:0042220~response to cocaine	2	7.40741	0.0484201	HSP90AA1, HSP90AB1	27	32	16792	38.8704	1	0.553604	0.54392
GOTERM_BP_DIRECT	GO:0046677~response to antibiotic	2	7.40741	0.0484201	HSP90AA1, JAK2	27	32	16792	38.8704	1	0.553604	0.54392
GOTERM_BP_DIRECT	GO:0070059~intrinsic apoptotic signaling pathway in response to endoplasmic reticulum stress	2	7.40741	0.0498963	GSK3B, BAX	27	33	16792	37.6925	1	0.561129	0.551314
GOTERM_BP_DIRECT	GO:0097192~extrinsic apoptotic signaling pathway in absence of ligand	2	7.40741	0.0513703	GSK3B, BAX	27	34	16792	36.5839	1	0.568388	0.558445
GOTERM_BP_DIRECT	GO:0010043~response to zinc ion	2	7.40741	0.0543117	VCAM1, CA2	27	36	16792	34.5514	1	0.591394	0.581049
GOTERM_BP_DIRECT	GO:0030522~intracellular receptor signaling pathway	2	7.40741	0.0572444	NCOA2, AR	27	38	16792	32.7329	1	0.613588	0.602855
GOTERM_BP_DIRECT	GO:0007267~cell-cell signaling	3	11.1111	0.0583904	AR, ADRB2, ESR2	27	254	16792	7.34558	1	0.616243	0.605464
GOTERM_BP_DIRECT	GO:0055114~oxidation-reduction process	4	14.8148	0.0621726	VCAM1, NOS2, PTGS2, PTGS1	27	592	16792	4.2022	1	0.6364	0.625268
GOTERM_BP_DIRECT	GO:0006986~response to unfolded protein	2	7.40741	0.0630834	HSP90AA1, HSP90AB1	27	42	16792	29.6155	1	0.6364	0.625268
GOTERM_BP_DIRECT	GO:0097191~extrinsic apoptotic signaling pathway	2	7.40741	0.0630834	BAX, JAK2	27	42	16792	29.6155	1	0.6364	0.625268
GOTERM_BP_DIRECT	GO:0034644~cellular response to UV	2	7.40741	0.0659899	BAX, PTGS2	27	44	16792	28.2694	1	0.656073	0.644597
GOTERM_BP_DIRECT	GO:0032870~cellular response to hormone stimulus	2	7.40741	0.0674398	NCOA2, FOS	27	45	16792	27.6412	1	0.660911	0.649349
GOTERM_BP_DIRECT	GO:0031100~organ regeneration	2	7.40741	0.0703333	CCNA2, PPARG	27	47	16792	26.4649	1	0.679559	0.667671
GOTERM_BP_DIRECT	GO:0007157~heterophilic cell-cell adhesion via plasma membrane cell adhesion molecules	2	7.40741	0.0746573	VCAM1, SELE	27	50	16792	24.877	1	0.711319	0.698876
GOTERM_BP_DIRECT	GO:0071277~cellular response to calcium ion	2	7.40741	0.0760944	DPEP1, FOS	27	51	16792	24.3893	1	0.715079	0.70257
GOTERM_BP_DIRECT	GO:0016032~viral process	3	11.1111	0.0776344	CCNA2, VCAM1, BAX	27	299	16792	6.24006	1	0.719691	0.707102
GOTERM_BP_DIRECT	GO:0048146~positive regulation of fibroblast proliferation	2	7.40741	0.0803926	CCNA2, ESR1	27	54	16792	23.0343	1	0.735325	0.722462
GOTERM_BP_DIRECT	GO:0042475~odontogenesis of dentin-containing tooth	2	7.40741	0.0818211	CA2, BAX	27	55	16792	22.6155	1	0.738543	0.725624
GOTERM_BP_DIRECT	GO:0032091~negative regulation of protein binding	2	7.40741	0.0846717	GSK3B, BAX	27	57	16792	21.822	1	0.744676	0.73165
GOTERM_BP_DIRECT	GO:0043401~steroid hormone mediated signaling pathway	2	7.40741	0.0846717	PPARG, ESR1	27	57	16792	21.822	1	0.744676	0.73165
GOTERM_BP_DIRECT	GO:0051259~protein oligomerization	2	7.40741	0.0860937	AR, BAX	27	58	16792	21.4457	1	0.747599	0.734521
GOTERM_BP_DIRECT	GO:0043433~negative regulation of sequence-specific DNA binding transcription factor activity	2	7.40741	0.0889315	PIM1, ESR1	27	60	16792	20.7309	1	0.755832	0.74261
GOTERM_BP_DIRECT	GO:0032092~positive regulation of protein binding	2	7.40741	0.0903472	GSK3B, HSP90AB1	27	61	16792	20.391	1	0.755832	0.74261
GOTERM_BP_DIRECT	GO:0006950~response to stress	2	7.40741	0.0903472	HSP90AA1, HSP90AB1	27	61	16792	20.391	1	0.755832	0.74261
GOTERM_BP_DIRECT	GO:0006977~DNA damage response, signal transduction by p53 class mediator resulting in cell cycle arrest	2	7.40741	0.0917609	CDK2, BAX	27	62	16792	20.0621	1	0.758409	0.745142
GOTERM_BP_DIRECT	GO:0000122~negative regulation of transcription from RNA polymerase II promoter	4	14.8148	0.0984048	NCOA2, PPARG, ESR1, ESR2	27	720	16792	3.45514	1	0.797352	0.783404
GOTERM_BP_DIRECT	GO:0050796~regulation of insulin secretion	2	7.40741	0.0987972	NOS2, SLC2A1	27	67	16792	18.565	1	0.797352	0.783404
Category	Term	Count	%	PValue	Genes	List Total	Pop Hits	Pop Total	Fold Enrichment	Bonferroni	Benjamini	FDR
GOTERM_CC_DIRECT	GO:0005634~nucleus	19	70.3704	3.61574e-05	NCOA2, GSK3B, HSP90AA1, HSP90AB1, NOS2, FOS, ADRB2, PTGS2, MAPK14, ESR1, ESR2, PTGS1, CCNA2, AR, CDK2, PIM1, BAX, PPARG, JAK2	27	5415	18224	2.36829	0.00411354	0.00412195	0.00372421
GOTERM_CC_DIRECT	GO:0005901~caveola	4	14.8148	0.000106184	SLC2A1, JAK2, PTGS2, SELE	27	65	18224	41.5362	0.0120327	0.0041265	0.00372833
GOTERM_CC_DIRECT	GO:0005737~cytoplasm	18	66.6667	0.000108592	NCOA2, GSK3B, GABBR1, HSP90AA1, HSP90AB1, NOS2, PTGS2, MAPK14, ESR1, PIK3CG, PTGS1, CCNA2, AR, CA2, CDK2, PIM1, BAX, JAK2	27	5222	18224	2.32657	0.0123038	0.0041265	0.00372833
GOTERM_CC_DIRECT	GO:0005829~cytosol	14	51.8519	0.000225492	GSK3B, HSP90AA1, HSP90AB1, NOS2, SLC2A1, FOS, MAPK14, PIK3CG, AR, CA2, CDK2, BAX, PPARG, JAK2	27	3315	18224	2.85052	0.0253814	0.00642654	0.00580643
GOTERM_CC_DIRECT	GO:0016324~apical plasma membrane	5	18.5185	0.00072154	HSP90AA1, HSP90AB1, SLC2A1, DPEP1, ADRB2	27	291	18224	11.5973	0.0789908	0.0163425	0.0147655
GOTERM_CC_DIRECT	GO:0005654~nucleoplasm	12	44.4444	0.000860129	CCNA2, NCOA2, AR, HSP90AA1, HSP90AB1, CDK2, PPARG, FOS, JAK2, MAPK14, ESR1, ESR2	27	2784	18224	2.90932	0.0934389	0.0163425	0.0147655
GOTERM_CC_DIRECT	GO:0005886~plasma membrane	14	51.8519	0.00201156	GSK3B, GABBR1, HSP90AA1, VCAM1, SLC2A1, ADRB2, F11R, SELE, ESR1, PIK3CG, AR, CA2, PIM1, DPEP1	27	4121	18224	2.29301	0.205108	0.0297029	0.0268368
GOTERM_CC_DIRECT	GO:0016323~basolateral plasma membrane	4	14.8148	0.00208441	HSP90AA1, HSP90AB1, CA2, SLC2A1	27	180	18224	14.9992	0.211696	0.0297029	0.0268368
GOTERM_CC_DIRECT	GO:0097124~cyclin A2-CDK2 complex	2	7.40741	0.00285142	CCNA2, CDK2	27	2	18224	674.963	0.277853	0.036118	0.032633
GOTERM_CC_DIRECT	GO:0045177~apical part of cell	3	11.1111	0.00509487	VCAM1, CA2, DPEP1	27	75	18224	26.9985	0.441388	0.0580815	0.0524771
GOTERM_CC_DIRECT	GO:0042470~melanosome	3	11.1111	0.00906362	HSP90AA1, HSP90AB1, SLC2A1	27	101	18224	20.0484	0.645825	0.0889834	0.0803973
GOTERM_CC_DIRECT	GO:0016020~membrane	9	33.3333	0.00936667	HSP90AA1, VCAM1, HSP90AB1, SLC2A1, BAX, FOS, JAK2, ESR1, PIK3CG	27	2200	18224	2.76121	0.657962	0.0889834	0.0803973
GOTERM_CC_DIRECT	GO:0048471~perinuclear region of cytoplasm	5	18.5185	0.0109953	GSK3B, HSP90AA1, NOS2, PPARG, SELE	27	621	18224	5.43448	0.716462	0.0924936	0.0835688
GOTERM_CC_DIRECT	GO:0001939~female pronucleus	2	7.40741	0.0113589	CCNA2, SLC2A1	27	8	18224	168.741	0.7281	0.0924936	0.0835688
GOTERM_CC_DIRECT	GO:0070062~extracellular exosome	10	37.037	0.0126106	HSP90AA1, VCAM1, HSP90AB1, CA2, SLC2A1, BAX, DPEP1, F11R, MAPK14, PTGS1	27	2811	18224	2.40115	0.764667	0.0958408	0.086593
GOTERM_CC_DIRECT	GO:0030863~cortical cytoskeleton	2	7.40741	0.030939	NOS2, SELE	27	22	18224	61.3603	0.972201	0.218254	0.197194
GOTERM_CC_DIRECT	GO:0005794~Golgi apparatus	5	18.5185	0.0325466	CCNA2, VCAM1, PPARG, ESR1, PTGS1	27	863	18224	3.91056	0.976995	0.218254	0.197194
GOTERM_CC_DIRECT	GO:0043005~neuron projection	3	11.1111	0.0446045	HSP90AA1, FOS, PTGS2	27	237	18224	8.54383	0.994493	0.282495	0.255237
GOTERM_CC_DIRECT	GO:0031526~brush border membrane	2	7.40741	0.0703186	HSP90AA1, HSP90AB1	27	51	18224	26.4691	0.999754	0.421911	0.381201
GOTERM_CC_DIRECT	GO:0005902~microvillus	2	7.40741	0.0782717	VCAM1, CA2	27	57	18224	23.6829	0.999908	0.446149	0.403099
Category	Term	Count	%	PValue	Genes	List Total	Pop Hits	Pop Total	Fold Enrichment	Bonferroni	Benjamini	FDR
GOTERM_MF_DIRECT	GO:0005515~protein binding	25	92.5926	1.25323e-05	GSK3B, HSP90AB1, SLC2A1, ADRB2, F11R, PTGS2, PIK3CG, CA2, PIM1, JAK2, NCOA2, GABBR1, HSP90AA1, NOS2, FOS, MAPK14, SELE, ESR1, ESR2, CCNA2, AR, CDK2, BAX, DPEP1, PPARG	27	8785	16881	1.77923	0.00201567	0.0018024	0.00154491
GOTERM_MF_DIRECT	GO:0005524~ATP binding	8	29.6296	0.00615533	GSK3B, HSP90AA1, HSP90AB1, CDK2, PIM1, JAK2, MAPK14, PIK3CG	27	1495	16881	3.34567	0.629933	0.0450458	0.0386107
GOTERM_MF_DIRECT	GO:0008134~transcription factor binding	6	22.2222	6.40487e-05	NCOA2, AR, PIM1, PPARG, FOS, ESR1	27	284	16881	13.2089	0.0102592	0.00257796	0.00220968
GOTERM_MF_DIRECT	GO:0019899~enzyme binding	6	22.2222	0.000135582	AR, PPARG, MAPK14, PTGS2, ESR1, ESR2	27	333	16881	11.2653	0.0215936	0.00363811	0.00311838
GOTERM_MF_DIRECT	GO:0008270~zinc ion binding	6	22.2222	0.0306918	AR, CA2, DPEP1, PPARG, ESR1, ESR2	27	1169	16881	3.20901	0.993387	0.149739	0.128347
GOTERM_MF_DIRECT	GO:0004672~protein kinase activity	5	18.5185	0.00207646	GSK3B, CDK2, JAK2, MAPK14, PIK3CG	27	359	16881	8.70783	0.284417	0.0330383	0.0283186
GOTERM_MF_DIRECT	GO:0004674~protein serine/threonine kinase activity	5	18.5185	0.0024565	GSK3B, CDK2, PIM1, MAPK14, PIK3CG	27	376	16881	8.31413	0.326981	0.0330383	0.0283186
GOTERM_MF_DIRECT	GO:0003682~chromatin binding	5	18.5185	0.00282967	NCOA2, AR, PPARG, FOS, ESR1	27	391	16881	7.99517	0.366327	0.0330383	0.0283186
GOTERM_MF_DIRECT	GO:0043565~sequence-specific DNA binding	5	18.5185	0.00766282	AR, PPARG, FOS, ESR1, ESR2	27	518	16881	6.03496	0.710171	0.0475457	0.0407535
GOTERM_MF_DIRECT	GO:0042803~protein homodimerization activity	5	18.5185	0.0243073	HSP90AA1, NOS2, BAX, ADRB2, PTGS2	27	730	16881	4.28234	0.980972	0.126573	0.108491
GOTERM_MF_DIRECT	GO:0042802~identical protein binding	5	18.5185	0.0264155	HSP90AA1, SLC2A1, BAX, PPARG, ESR1	27	749	16881	4.17371	0.986567	0.132903	0.113917
GOTERM_MF_DIRECT	GO:0003700~transcription factor activity, sequence-specific DNA binding	5	18.5185	0.0575014	AR, PPARG, FOS, ESR1, ESR2	27	961	16881	3.25298	0.999928	0.250209	0.214465
GOTERM_MF_DIRECT	GO:0004879~RNA polymerase II transcription factor activity, ligand-activated sequence-specific DNA binding	4	14.8148	2.23901e-05	AR, PPARG, ESR1, ESR2	27	36	16881	69.4691	0.00359835	0.0018024	0.00154491
GOTERM_MF_DIRECT	GO:0003707~steroid hormone receptor activity	4	14.8148	8.5168e-05	AR, PPARG, ESR1, ESR2	27	56	16881	44.6587	0.013619	0.00274241	0.00235064
GOTERM_MF_DIRECT	GO:0020037~heme binding	4	14.8148	0.00118584	NOS2, JAK2, PTGS2, PTGS1	27	137	16881	18.2547	0.173896	0.0238651	0.0204558
GOTERM_MF_DIRECT	GO:0016301~kinase activity	4	14.8148	0.00586241	GSK3B, CDK2, JAK2, PIK3CG	27	241	16881	10.3771	0.611952	0.0450458	0.0386107
GOTERM_MF_DIRECT	GO:0000978~RNA polymerase II core promoter proximal region sequence-specific DNA binding	4	14.8148	0.0167572	NCOA2, AR, FOS, ESR1	27	355	16881	7.04476	0.934176	0.0999227	0.085648
GOTERM_MF_DIRECT	GO:0019901~protein kinase binding	4	14.8148	0.0195006	CCNA2, GSK3B, HSP90AB1, JAK2	27	376	16881	6.6513	0.958022	0.112128	0.0961101
GOTERM_MF_DIRECT	GO:0030235~nitric-oxide synthase regulator activity	3	11.1111	6.35082e-05	HSP90AA1, HSP90AB1, ESR1	27	8	16881	234.458	0.0101731	0.00257796	0.00220968
GOTERM_MF_DIRECT	GO:0005496~steroid binding	3	11.1111	0.00078192	AR, ESR1, ESR2	27	27	16881	69.4691	0.118331	0.0179842	0.015415
GOTERM_MF_DIRECT	GO:0001046~core promoter sequence-specific DNA binding	3	11.1111	0.00198139	PPARG, ESR1, ESR2	27	43	16881	43.6202	0.273357	0.0330383	0.0283186
GOTERM_MF_DIRECT	GO:0019903~protein phosphatase binding	3	11.1111	0.00420511	HSP90AA1, PPARG, MAPK14	27	63	16881	29.7725	0.492597	0.0412673	0.035372
GOTERM_MF_DIRECT	GO:0008013~beta-catenin binding	3	11.1111	0.0070236	GSK3B, AR, ESR1	27	82	16881	22.874	0.67851	0.0475457	0.0407535
GOTERM_MF_DIRECT	GO:0046983~protein dimerization activity	3	11.1111	0.0221705	NCOA2, AR, HSP90AB1	27	150	16881	12.5044	0.972938	0.123084	0.105501
GOTERM_MF_DIRECT	GO:0044212~transcription regulatory region DNA binding	3	11.1111	0.0422307	AR, PPARG, FOS	27	213	16881	8.80595	0.999038	0.194261	0.16651
GOTERM_MF_DIRECT	GO:0001077~transcriptional activator activity, RNA polymerase II core promoter proximal region sequence-specific binding	3	11.1111	0.0507675	AR, FOS, ESR1	27	236	16881	7.94774	0.999772	0.227043	0.194609
GOTERM_MF_DIRECT	GO:0002135~CTP binding	2	7.40741	0.00307811	HSP90AA1, HSP90AB1	27	2	16881	625.222	0.391245	0.0330383	0.0283186
GOTERM_MF_DIRECT	GO:0004666~prostaglandin-endoperoxide synthase activity	2	7.40741	0.00307811	PTGS2, PTGS1	27	2	16881	625.222	0.391245	0.0330383	0.0283186
GOTERM_MF_DIRECT	GO:0038052~RNA polymerase II transcription factor activity, estrogen-activated sequence-specific DNA binding	2	7.40741	0.00307811	ESR1, ESR2	27	2	16881	625.222	0.391245	0.0330383	0.0283186
GOTERM_MF_DIRECT	GO:0002134~UTP binding	2	7.40741	0.00461374	HSP90AA1, HSP90AB1	27	3	16881	416.815	0.525043	0.0412673	0.035372
GOTERM_MF_DIRECT	GO:0017098~sulfonylurea receptor binding	2	7.40741	0.00461374	HSP90AA1, HSP90AB1	27	3	16881	416.815	0.525043	0.0412673	0.035372
GOTERM_MF_DIRECT	GO:0034056~estrogen response element binding	2	7.40741	0.0061471	ESR1, ESR2	27	4	16881	312.611	0.629439	0.0450458	0.0386107
GOTERM_MF_DIRECT	GO:0032564~dATP binding	2	7.40741	0.0061471	HSP90AA1, HSP90AB1	27	4	16881	312.611	0.629439	0.0450458	0.0386107
GOTERM_MF_DIRECT	GO:0030911~TPR domain binding	2	7.40741	0.00767819	HSP90AA1, HSP90AB1	27	5	16881	250.089	0.710893	0.0475457	0.0407535
GOTERM_MF_DIRECT	GO:0030284~estrogen receptor activity	2	7.40741	0.00767819	ESR1, ESR2	27	5	16881	250.089	0.710893	0.0475457	0.0407535
GOTERM_MF_DIRECT	GO:0023026~MHC class II protein complex binding	2	7.40741	0.0243712	HSP90AA1, HSP90AB1	27	16	16881	78.1528	0.981171	0.126573	0.108491
GOTERM_MF_DIRECT	GO:0004601~peroxidase activity	2	7.40741	0.0333623	PTGS2, PTGS1	27	22	16881	56.8384	0.995759	0.15798	0.135412
GOTERM_MF_DIRECT	GO:0001085~RNA polymerase II transcription factor binding	2	7.40741	0.069975	GSK3B, AR	27	47	16881	26.6052	0.999992	0.296473	0.25412
GOTERM_MF_DIRECT	GO:0030374~ligand-dependent nuclear receptor transcription coactivator activity	2	7.40741	0.0757079	NCOA2, PPARG	27	51	16881	24.5185	0.999997	0.312538	0.26789
GOTERM_MF_DIRECT	GO:0001948~glycoprotein binding	2	7.40741	0.0955066	HSP90AA1, HSP90AB1	27	65	16881	19.2376	1	0.384414	0.329498

## Sheet: ISL-CRC Network
AverageShortestPathLength	BetweennessCentrality	ClosenessCentrality	ClusteringCoefficient	Degree	Eccentricity	IsSingleNode	name	NeighborhoodConnectivity	NumberOfDirectedEdges	NumberOfUndirectedEdges	PartnerOfMultiEdgedNodePairs	Radiality	selected	SelfLoops	shared name	Stress	TopologicalCoefficient	TYPE
1.03571	0.257226	0.965517	0.233618	27	2	FALSE	CRC	8.07407	0	27	0	0.998677	TRUE	0	CRC	538	0.297668	CRC
1.03571	0.257226	0.965517	0.233618	27	2	FALSE	isoliquiritigenin	8.07407	0	27	0	0.998677	TRUE	0	isoliquiritigenin	538	0.297668	ISL
1.42857	0.0341431	0.7	0.525	17	2	FALSE	PTGS2	12.25	0	17	1	0.984127	TRUE	0	PTGS2	114	0.4375	TARGET
1.46429	0.0321925	0.682927	0.514286	15	2	FALSE	AR	12	0	15	0	0.982804	TRUE	0	AR	102	0.428571	TARGET
1.5	0.0145296	0.666667	0.648352	14	2	FALSE	ESR1	13.0714	0	14	0	0.981481	TRUE	0	ESR1	64	0.466837	TARGET
1.5	0.0286936	0.666667	0.516484	14	2	FALSE	FOS	12.2143	0	14	0	0.981481	TRUE	0	FOS	88	0.436224	TARGET
1.53571	0.016371	0.651163	0.615385	13	2	FALSE	MAPK14	13.7692	0	13	0	0.980159	TRUE	0	MAPK14	60	0.491758	TARGET
1.53571	0.0135082	0.651163	0.641026	13	2	FALSE	HSP90AA1	13.3077	0	13	0	0.980159	TRUE	0	HSP90AA1	56	0.475275	TARGET
1.60714	0.0148908	0.622222	0.563636	11	2	FALSE	PPARG	12.6364	0	11	0	0.977513	TRUE	0	PPARG	48	0.451299	TARGET
1.64286	0.00788752	0.608696	0.666667	10	2	FALSE	NOS2	13.7	0	10	0	0.97619	TRUE	0	NOS2	30	0.489286	TARGET
1.64286	0.0101876	0.608696	0.577778	10	2	FALSE	JAK2	14	0	10	0	0.97619	TRUE	0	JAK2	38	0.5	TARGET
1.64286	0.00430769	0.608696	0.733333	10	2	FALSE	HSP90AB1	14.5	0	10	0	0.97619	TRUE	0	HSP90AB1	24	0.517857	TARGET
1.67857	0.00295659	0.595745	0.777778	9	2	FALSE	ESR2	15.5556	0	9	0	0.974868	TRUE	0	ESR2	16	0.555556	TARGET
1.67857	0.00660466	0.595745	0.694444	9	2	FALSE	VCAM1	14.3333	0	9	0	0.974868	TRUE	0	VCAM1	22	0.511905	TARGET
1.67857	0.00760407	0.595745	0.666667	9	2	FALSE	GSK3B	15.1111	0	9	0	0.974868	TRUE	0	GSK3B	24	0.539683	TARGET
1.71429	0.00178082	0.583333	0.821429	8	2	FALSE	CDK2	15.75	0	8	0	0.973545	TRUE	0	CDK2	10	0.5625	TARGET
1.78571	0.00142073	0.56	0.8	7	2	FALSE	SELE	15.5	0	7	1	0.970899	TRUE	0	SELE	6	0.553571	TARGET
1.78571	0.000392	0.56	0.866667	6	2	FALSE	NCOA2	17.6667	0	6	0	0.970899	TRUE	0	NCOA2	4	0.630952	TARGET
1.78571	9.8e-05	0.56	0.933333	6	2	FALSE	CCNA2	17.5	0	6	0	0.970899	TRUE	0	CCNA2	2	0.625	TARGET
1.82143	9.8e-05	0.54902	0.9	5	2	FALSE	PTGS1	18.2	0	5	0	0.969577	TRUE	0	PTGS1	2	0.65	TARGET
1.82143	0.000429	0.54902	0.8	5	2	FALSE	PIM1	18.4	0	5	0	0.969577	TRUE	0	PIM1	4	0.657143	TARGET
1.82143	0.000759	0.54902	0.8	5	2	FALSE	ADRB2	16.6	0	5	0	0.969577	TRUE	0	ADRB2	4	0.592857	TARGET
1.85714	9.8e-05	0.538462	0.833333	4	2	FALSE	SLC2A1	20.25	0	4	0	0.968254	TRUE	0	SLC2A1	2	0.723214	TARGET
1.85714	0.000392	0.538462	0.666667	4	2	FALSE	PIK3CG	19.25	0	4	0	0.968254	TRUE	0	PIK3CG	4	0.6875	TARGET
1.85714	9.8e-05	0.538462	0.833333	4	2	FALSE	F11R	17.25	0	4	0	0.968254	TRUE	0	F11R	2	0.616071	TARGET
1.85714	9.8e-05	0.538462	0.833333	4	2	FALSE	GABBR1	18.25	0	4	0	0.968254	TRUE	0	GABBR1	2	0.651786	TARGET
1.89286	9.8e-05	0.528302	0.666667	3	2	FALSE	BAX	21	0	3	0	0.966931	TRUE	0	BAX	2	0.75	TARGET
1.89286	9.8e-05	0.528302	0.666667	3	2	FALSE	CA2	23	0	3	0	0.966931	TRUE	0	CA2	2	0.821429	TARGET
1.92857	9.8e-05	0.518519	0	2	2	FALSE	DPEP1	27	0	2	0	0.965608	TRUE	0	DPEP1	2	1	TARGET
